# Supplementary material for: shinyDepMap, a tool to identify targetable cancer genes and their functional connections from Cancer Dependency Map data
Source: eLife. 2021 Feb 8;10:e57116. doi: 10.7554/eLife.57116 (PMC7924953; doi:10.7554/eLife.57116)
Supplement: Figure 1—source data 1. [file elife-57116-fig1-data1.xlsx]

## Sheet: cell_lines
DepMap_ID	stripped_cell_line_name	CCLE_Name	lineage	lineage_subtype	lineage_sub_subtype	sex
ACH-000004	HEL	HEL_HAEMATOPOIETIC_AND_LYMPHOID_TISSUE	leukemia	AML		Male
ACH-000005	HEL9217	HEL9217_HAEMATOPOIETIC_AND_LYMPHOID_TISSUE	leukemia	AML		Male
ACH-000007	LS513	LS513_LARGE_INTESTINE	colorectal			Male
ACH-000009	C2BBE1	C2BBE1_LARGE_INTESTINE	colorectal			Male
ACH-000012	HCC827	HCC827_LUNG	lung	lung_NSC	lung_adenocarcinoma	Female
ACH-000014	HS294T	HS294T_SKIN	skin	melanoma		Male
ACH-000015	NCIH1581	NCIH1581_LUNG	lung	lung_NSC	lung_large	Male
ACH-000017	SKBR3	SKBR3_BREAST	breast	HER2Amp		Female
ACH-000018	T24	T24_URINARY_TRACT	urinary_tract			Female
ACH-000019	MCF7	MCF7_BREAST	breast	ERpos		Female
ACH-000021	NCIH1693	NCIH1693_LUNG	lung	lung_NSC	lung_adenocarcinoma	Female
ACH-000025	CH157MN	CH157MN_CENTRAL_NERVOUS_SYSTEM	central_nervous_system	meningioma		Female
ACH-000028	KPL1	KPL1_BREAST	breast	ERpos		Female
ACH-000029	HCC827GR5	HCC827GR5_LUNG	lung	lung_NSC	lung_adenocarcinoma	Female
ACH-000030	PC14	PC14_LUNG	lung	lung_NSC	lung_adenocarcinoma	Male
ACH-000035	NCIH1650	NCIH1650_LUNG	lung	lung_NSC	lung_adenocarcinoma	Male
ACH-000036	U343	U343_CENTRAL_NERVOUS_SYSTEM	central_nervous_system	glioma	glioblastoma
ACH-000039	SKNMC	SKNMC_BONE	bone	Ewing_sarcoma		Female
ACH-000040	U118MG	U118MG_CENTRAL_NERVOUS_SYSTEM	central_nervous_system	glioma	astrocytoma	Male
ACH-000041	RDES	RDES_BONE	bone	Ewing_sarcoma		Male
ACH-000042	PANC0203	PANC0203_PANCREAS	pancreas			Female
ACH-000045	MV411	MV411_HAEMATOPOIETIC_AND_LYMPHOID_TISSUE	leukemia	AML		Male
ACH-000052	A673	A673_BONE	bone	Ewing_sarcoma		Female
ACH-000054	HT1080	HT1080_SOFT_TISSUE	soft_tissue	fibrosarcoma		Male
ACH-000055	D283MED	D283MED_CENTRAL_NERVOUS_SYSTEM	central_nervous_system	medulloblastoma	med_group_3	Male
ACH-000060	PANC1005	PANC1005_PANCREAS	pancreas			Male
ACH-000067	HS683	HS683_CENTRAL_NERVOUS_SYSTEM	central_nervous_system	glioma	oligodendroglioma	Male
ACH-000070	697	697_HAEMATOPOIETIC_AND_LYMPHOID_TISSUE	leukemia	B-cell_ALL		Male
ACH-000075	U87MG	U87MG_CENTRAL_NERVOUS_SYSTEM	central_nervous_system	glioma	astrocytoma
ACH-000086	ACCMESO1	ACCMESO1_PLEURA	mesothelioma			Female
ACH-000087	SKES1	SKES1_BONE	bone	Ewing_sarcoma		Male
ACH-000092	NCIH2452	NCIH2452_PLEURA	mesothelioma			Male
ACH-000095	D341	D341MED_CENTRAL_NERVOUS_SYSTEM	central_nervous_system	medulloblastoma	med_group_3	Male
ACH-000096	G401	G401_SOFT_TISSUE	rhabdoid			Male
ACH-000097	ZR751	ZR751_BREAST	breast	ERpos		Female
ACH-000098	GAMG	GAMG_CENTRAL_NERVOUS_SYSTEM	central_nervous_system	glioma	glioblastoma	Female
ACH-000108	KP3	KP3_PANCREAS	pancreas			Male
ACH-000113	OCIAML2	OCIAML2_HAEMATOPOIETIC_AND_LYMPHOID_TISSUE	leukemia	AML		Male
ACH-000115	VCAP	VCAP_PROSTATE	prostate			Male
ACH-000118	HUPT3	HUPT3_PANCREAS	pancreas			Male
ACH-000123	COV434	COV434_OVARY	ovary	ovary_adenocarcinoma	ovary_endometrioid	Female
ACH-000127	SLR20	SLR20_KIDNEY	kidney
ACH-000128	LN319	LN319_CENTRAL_NERVOUS_SYSTEM	central_nervous_system	glioma	astrocytoma	Male
ACH-000132	JHOS2	JHOS2_OVARY	ovary	ovary_adenocarcinoma	ovary_high_grade_serous	Female
ACH-000133	HS729	HS729_SOFT_TISSUE	fibroblast			Male
ACH-000138	CFPAC1	CFPAC1_PANCREAS	pancreas			Male
ACH-000142	CAL29	CAL29_URINARY_TRACT	urinary_tract			Female
ACH-000143	HCC2429	HCC2429_LUNG	lung	lung_NSC		Female
ACH-000146	THP1	THP1_HAEMATOPOIETIC_AND_LYMPHOID_TISSUE	leukemia	AML		Male
ACH-000148	HS578T	HS578T_BREAST	breast	TNBC		Female
ACH-000152	M059K	M059K_CENTRAL_NERVOUS_SYSTEM	central_nervous_system	glioma	glioblastoma	Male
ACH-000153	NCIH2052	NCIH2052_PLEURA	mesothelioma			Male
ACH-000159	OSRC2	OSRC2_KIDNEY	kidney			Male
ACH-000160	BT12	BT12_SOFT_TISSUE	rhabdoid			Female
ACH-000163	SW579	SW579_THYROID	thyroid			Male
ACH-000168	NOMO1	NOMO1_HAEMATOPOIETIC_AND_LYMPHOID_TISSUE	leukemia	AML		Female
ACH-000169	RD	RD_SOFT_TISSUE	rhabdomyosarcoma			Female
ACH-000178	HS766T	HS766T_PANCREAS	pancreas			Male
ACH-000183	L363	L363_HAEMATOPOIETIC_AND_LYMPHOID_TISSUE	multiple_myeloma			Female
ACH-000188	SCC25	SCC25_UPPER_AERODIGESTIVE_TRACT	upper_aerodigestive	upper_aerodigestive_squamous		Male
ACH-000202	COLO320	COLO320_LARGE_INTESTINE	colorectal			Female
ACH-000206	C8166	C8166_HAEMATOPOIETIC_AND_LYMPHOID_TISSUE	lymphoma	T-cell_lymphoma_other
ACH-000207	DETROIT562	DETROIT562_UPPER_AERODIGESTIVE_TRACT	upper_aerodigestive	upper_aerodigestive_squamous		Female
ACH-000209	SNU1079	SNU1079_BILIARY_TRACT	bile_duct	cholangiocarcinoma	intrahepatic	Male
ACH-000211	DAOY	DAOY_CENTRAL_NERVOUS_SYSTEM	central_nervous_system	medulloblastoma	non-MYC	Male
ACH-000215	LN382	LN382_CENTRAL_NERVOUS_SYSTEM	central_nervous_system	glioma	glioblastoma	Male
ACH-000217	JHH6	JHH6_LIVER	liver			Female
ACH-000222	ASPC1	ASPC1_PANCREAS	pancreas			Female
ACH-000223	HCC1937	HCC1937_BREAST	breast	TNBC		Female
ACH-000227	KPNYN	KPNYN_AUTONOMIC_GANGLIA	peripheral_nervous_system	neuroblastoma		Male
ACH-000231	KALS1	KALS1_CENTRAL_NERVOUS_SYSTEM	central_nervous_system	glioma	glioblastoma	Female
ACH-000232	U251MG	U251MG_CENTRAL_NERVOUS_SYSTEM	central_nervous_system	glioma	astrocytoma	Male
ACH-000234	CAKI2	CAKI2_KIDNEY	kidney			Male
ACH-000235	PANC0403	PANC0403_PANCREAS	pancreas			Male
ACH-000237	JHOM1	JHOM1_OVARY	ovary	ovary_adenocarcinoma	ovary_mucinous	Female
ACH-000238	SCC4	SCC4_UPPER_AERODIGESTIVE_TRACT	upper_aerodigestive	upper_aerodigestive_squamous		Male
ACH-000243	DANG	DANG_PANCREAS	pancreas			Female
ACH-000244	DKMG	DKMG_CENTRAL_NERVOUS_SYSTEM	central_nervous_system	glioma	glioblastoma	Female
ACH-000246	SLR23	SLR23_KIDNEY	kidney
ACH-000248	AU565	AU565_BREAST	breast	HER2Amp		Female
ACH-000250	KMRC20	KMRC20_KIDNEY	kidney
ACH-000251	NCIH2887	NCIH2887_LUNG	lung	lung_NSC		Male
ACH-000253	COLO201	COLO201_LARGE_INTESTINE	colorectal			Male
ACH-000255	LMSU	LMSU_STOMACH	gastric			Female
ACH-000256	COV318	COV318_OVARY	ovary	ovary_adenocarcinoma	ovary_high_grade_serous	Female
ACH-000257	CORL279	CORL279_LUNG	lung	lung_small		Male
ACH-000258	DU4475	DU4475_BREAST	breast	TNBC		Female
ACH-000259	KELLY	KELLY_AUTONOMIC_GANGLIA	peripheral_nervous_system	neuroblastoma		Female
ACH-000260	SKNAS	SKNAS_AUTONOMIC_GANGLIA	peripheral_nervous_system	neuroblastoma		Female
ACH-000261	RERFLCAI	RERFLCAI_LUNG	lung	lung_NSC	lung_squamous
ACH-000262	UOK101	UOK101_KIDNEY	kidney			Female
ACH-000263	KASUMI1	KASUMI1_HAEMATOPOIETIC_AND_LYMPHOID_TISSUE	leukemia	AML		Male
ACH-000264	CALU6	CALU6_LUNG	lung	lung_NSC		Female
ACH-000265	KP4	KP4_PANCREAS	pancreas			Male
ACH-000272	SLR24	SLR24_KIDNEY	kidney
ACH-000274	HS852T	HS852T_SKIN	skin	melanoma		Male
ACH-000277	HCC1419	HCC1419_BREAST	breast	HER2Amp		Female
ACH-000278	COV362	COV362_OVARY	ovary	ovary_adenocarcinoma	ovary_high_grade_serous	Female
ACH-000279	EWS502	EWS502_BONE	bone	Ewing_sarcoma
ACH-000280	SNU840	SNU840_OVARY	ovary	ovary_non_epithelial	Brenner_tumor	Female
ACH-000281	KP2	KP2_PANCREAS	pancreas			Female
ACH-000288	BT549	BT549_BREAST	breast	TNBC		Female
ACH-000290	NCIH209	NCIH209_LUNG	lung	lung_small		Male
ACH-000291	OV90	OV90_OVARY	ovary	ovary_adenocarcinoma	ovary_high_grade_serous	Female
ACH-000292	NCIH841	NCIH841_LUNG	lung	lung_small		Male
ACH-000294	NB4	NB4_HAEMATOPOIETIC_AND_LYMPHOID_TISSUE	leukemia	AML		Female
ACH-000296	OUMS23	OUMS23_LARGE_INTESTINE	colorectal			Male
ACH-000304	WM115	WM115_SKIN	skin	melanoma		Female
ACH-000307	PK1	PK1_PANCREAS	pancreas			Male
ACH-000308	EFO21	EFO21_OVARY	ovary	ovary_adenocarcinoma	ovary_clear_cell	Female
ACH-000311	NCIH2122	NCIH2122_LUNG	lung	lung_NSC	lung_adenocarcinoma	Female
ACH-000312	SKNBE2	SKNBE2_AUTONOMIC_GANGLIA	peripheral_nervous_system	neuroblastoma		Male
ACH-000315	KARPAS422	KARPAS422_HAEMATOPOIETIC_AND_LYMPHOID_TISSUE	lymphoma	DLBCL		Female
ACH-000316	SNU886	SNU886_LIVER	liver			Male
ACH-000317	TUHR14TKB	TUHR14TKB_KIDNEY	kidney			Male
ACH-000318	TE10	TE10_OESOPHAGUS	esophagus	esophagus_squamous		Male
ACH-000319	MPP89	MPP89_PLEURA	mesothelioma			Male
ACH-000320	PSN1	PSN1_PANCREAS	pancreas			Male
ACH-000322	HT144	HT144_SKIN	skin	melanoma		Male
ACH-000324	JHOC5	JHOC5_OVARY	ovary	ovary_adenocarcinoma	ovary_clear_cell	Female
ACH-000330	EFM19	EFM19_BREAST	breast	ERpos		Female
ACH-000334	DB	DB_HAEMATOPOIETIC_AND_LYMPHOID_TISSUE	lymphoma	DLBCL		Male
ACH-000336	OCIAML3	OCIAML3_HAEMATOPOIETIC_AND_LYMPHOID_TISSUE	leukemia	AML		Male
ACH-000337	NCIH3122	NCIH3122_LUNG	lung	lung_NSC	lung_adenocarcinoma
ACH-000339	HCC461	HCC461_LUNG	lung	lung_NSC	lung_adenocarcinoma	Male
ACH-000341	SKNFI	SKNFI_AUTONOMIC_GANGLIA	peripheral_nervous_system	neuroblastoma		Male
ACH-000348	RPMI7951	RPMI7951_SKIN	skin	melanoma		Female
ACH-000350	COLO678	COLO678_LARGE_INTESTINE	colorectal			Male
ACH-000352	HCC1428	HCC1428_BREAST	breast	ERpos		Female
ACH-000356	MKN45	MKN45_STOMACH	gastric	gastric_adenocarcinoma	diffuse_gastric	Female
ACH-000361	SKHEP1	SKHEP1_LIVER	liver			Male
ACH-000362	MOLM13	MOLM13_HAEMATOPOIETIC_AND_LYMPHOID_TISSUE	leukemia	AML		Male
ACH-000363	SKMM2	SKMM2_HAEMATOPOIETIC_AND_LYMPHOID_TISSUE	multiple_myeloma			Male
ACH-000364	U2OS	U2OS_BONE	bone	osteosarcoma		Female
ACH-000365	SUDHL4	SUDHL4_HAEMATOPOIETIC_AND_LYMPHOID_TISSUE	lymphoma	DLBCL		Male
ACH-000366	SKNDZ	SKNDZ_AUTONOMIC_GANGLIA	peripheral_nervous_system	neuroblastoma		Female
ACH-000368	SNU1105	SNU1105_CENTRAL_NERVOUS_SYSTEM	central_nervous_system	glioma	glioblastoma	Male
ACH-000374	HCC1143	HCC1143_BREAST	breast	TNBC		Female
ACH-000375	G402	G402_SOFT_TISSUE	rhabdoid			Female
ACH-000376	SF295	SF295_CENTRAL_NERVOUS_SYSTEM	central_nervous_system	glioma	glioblastoma	Female
ACH-000378	NCIH647	NCIH647_LUNG	lung	lung_NSC		Male
ACH-000383	OE33	OE33_OESOPHAGUS	esophagus	esophagus_adenocarcinoma		Female
ACH-000390	LUDLU1	LUDLU1_LUNG	lung	lung_NSC	lung_squamous	Male
ACH-000393	HLF	HLF_LIVER	liver			Male
ACH-000395	NCIH520	NCIH520_LUNG	lung	lung_NSC	lung_squamous	Male
ACH-000397	TEN	TEN_ENDOMETRIUM	uterus	uterus_endometrium		Female
ACH-000401	COLO800	COLO800_SKIN	skin	melanoma		Male
ACH-000403	NCIH747	NCIH747_LARGE_INTESTINE	colorectal			Male
ACH-000404	K029AX	K029AX_SKIN	skin	melanoma
ACH-000406	U937	U937_HAEMATOPOIETIC_AND_LYMPHOID_TISSUE	leukemia	AML		Male
ACH-000407	SNU685	SNU685_ENDOMETRIUM	uterus	uterus_endometrium		Female
ACH-000410	SAOS2	SAOS2_BONE	bone	osteosarcoma		Female
ACH-000411	769P	769P_KIDNEY	kidney			Female
ACH-000414	NCIH1944	NCIH1944_LUNG	lung	lung_NSC	lung_adenocarcinoma	Female
ACH-000415	BICR6	BICR6_UPPER_AERODIGESTIVE_TRACT	upper_aerodigestive	upper_aerodigestive_squamous		Male
ACH-000416	NCIH838	NCIH838_LUNG	lung	lung_NSC	lung_adenocarcinoma	Male
ACH-000420	SNU449	SNU449_LIVER	liver			Male
ACH-000421	SW837	SW837_LARGE_INTESTINE	colorectal			Male
ACH-000424	TC71	TC71_BONE	bone	Ewing_sarcoma		Male
ACH-000425	UACC62	UACC62_SKIN	skin	melanoma
ACH-000427	NCIN87	NCIN87_STOMACH	gastric	gastric_adenocarcinoma		Male
ACH-000433	CAKI1	CAKI1_KIDNEY	kidney			Male
ACH-000434	NCIH1915	NCIH1915_LUNG	lung	lung_NSC	lung_large	Female
ACH-000436	OCIMY7	OCIMY7_HAEMATOPOIETIC_AND_LYMPHOID_TISSUE	multiple_myeloma
ACH-000437	SW1088	SW1088_CENTRAL_NERVOUS_SYSTEM	central_nervous_system	glioma		Male
ACH-000444	LU99	LU99_LUNG	lung	lung_NSC	lung_large	Male
ACH-000445	KNS60	KNS60_CENTRAL_NERVOUS_SYSTEM	central_nervous_system	glioma	glioblastoma	Male
ACH-000448	NCIH1666	NCIH1666_LUNG	lung	lung_NSC	lung_adenocarcinoma	Female
ACH-000450	MELHO	MELHO_SKIN	skin	melanoma		Female
ACH-000452	TE8	TE8_OESOPHAGUS	esophagus	esophagus_squamous		Male
ACH-000454	HCC95	HCC95_LUNG	lung	lung_NSC	lung_squamous	Male
ACH-000458	CJM	CJM_SKIN	skin	melanoma
ACH-000459	TUHR10TKB	TUHR10TKB_KIDNEY	kidney			Male
ACH-000460	SNU8	SNU8_OVARY	ovary	ovary_adenocarcinoma	ovary_high_grade_serous	Female
ACH-000463	NCIH460	NCIH460_LUNG	lung	lung_NSC	lung_large	Male
ACH-000464	CAS1	CAS1_CENTRAL_NERVOUS_SYSTEM	central_nervous_system	glioma	glioblastoma	Male
ACH-000466	SNU216	SNU216_STOMACH	gastric	gastric_adenocarcinoma		Female
ACH-000470	SW1463	SW1463_LARGE_INTESTINE	colorectal			Female
ACH-000471	LI7	LI7_LIVER	liver			Male
ACH-000472	HSC2	HSC2_UPPER_AERODIGESTIVE_TRACT	upper_aerodigestive	upper_aerodigestive_squamous		Male
ACH-000473	RT112	RT112_URINARY_TRACT	urinary_tract			Female
ACH-000475	HUH1	HUH1_LIVER	liver			Male
ACH-000480	HUH7	HUH7_LIVER	liver			Male
ACH-000481	NCIH2170	NCIH2170_LUNG	lung	lung_NSC	lung_squamous	Male
ACH-000484	VMRCRCW	VMRCRCW_KIDNEY	kidney			Male
ACH-000485	GSU	GSU_STOMACH	gastric	gastric_adenocarcinoma		Male
ACH-000486	KU1919	KU1919_URINARY_TRACT	urinary_tract			Male
ACH-000487	F36P	F36P_HAEMATOPOIETIC_AND_LYMPHOID_TISSUE	leukemia	AML		Male
ACH-000488	TE11	TE11_OESOPHAGUS	esophagus	esophagus_squamous		Male
ACH-000490	SF767	SF767_CENTRAL_NERVOUS_SYSTEM	central_nervous_system			Female
ACH-000491	NCIH716	NCIH716_LARGE_INTESTINE	colorectal			Male
ACH-000493	SNU423	SNU423_LIVER	liver			Male
ACH-000495	TUHR4TKB	TUHR4TKB_KIDNEY	kidney			Male
ACH-000496	NCIH1792	NCIH1792_LUNG	lung	lung_NSC	lung_adenocarcinoma	Male
ACH-000499	EW8	EW8_BONE	bone	Ewing_sarcoma		Male
ACH-000502	TCCPAN2	TCCPAN2_PANCREAS	pancreas			Female
ACH-000505	RKN	RKN_SOFT_TISSUE	soft_tissue	leiomyosarcoma		Female
ACH-000507	KE39	KE39_STOMACH	gastric	gastric_adenocarcinoma		Male
ACH-000510	NCIH1299	NCIH1299_LUNG	lung	lung_NSC	lung_large	Male
ACH-000511	CALU1	CALU1_LUNG	lung	lung_NSC	lung_squamous	Male
ACH-000512	INA6	INA6_HAEMATOPOIETIC_AND_LYMPHOID_TISSUE	multiple_myeloma			Male
ACH-000517	SNU410	SNU410_PANCREAS	pancreas			Male
ACH-000518	CAL33	CAL33_UPPER_AERODIGESTIVE_TRACT	upper_aerodigestive	upper_aerodigestive_squamous		Male
ACH-000521	NCIH2030	NCIH2030_LUNG	lung	lung_NSC	lung_adenocarcinoma	Male
ACH-000522	UMUC3	UMUC3_URINARY_TRACT	urinary_tract			Male
ACH-000524	KURAMOCHI	KURAMOCHI_OVARY	ovary	ovary_adenocarcinoma	ovary_high_grade_serous	Female
ACH-000527	OVISE	OVISE_OVARY	ovary	ovary_adenocarcinoma	ovary_clear_cell	Female
ACH-000528	ABC1	ABC1_LUNG	lung	lung_NSC	lung_adenocarcinoma	Male
ACH-000537	SNU761	SNU761_LIVER	liver			Male
ACH-000541	KMS34	KMS34_HAEMATOPOIETIC_AND_LYMPHOID_TISSUE	multiple_myeloma			Female
ACH-000542	HEYA8	HEYA8_OVARY	ovary	ovary_adenocarcinoma	ovary_low_grade_serous	Female
ACH-000544	OE21	OE21_OESOPHAGUS	esophagus	esophagus_squamous		Male
ACH-000547	HT1197	HT1197_URINARY_TRACT	urinary_tract			Male
ACH-000548	BHY	BHY_UPPER_AERODIGESTIVE_TRACT	upper_aerodigestive	upper_aerodigestive_squamous		Male
ACH-000549	SNU1076	SNU1076_UPPER_AERODIGESTIVE_TRACT	upper_aerodigestive	upper_aerodigestive_squamous		Male
ACH-000550	IGR39	IGR39_SKIN	skin	melanoma		Male
ACH-000552	HT29	HT29_LARGE_INTESTINE	colorectal			Female
ACH-000556	SIHA	SIHA_CERVIX	cervix			Female
ACH-000557	AML193	AML193_HAEMATOPOIETIC_AND_LYMPHOID_TISSUE	leukemia	AML		Female
ACH-000570	YKG1	YKG1_CENTRAL_NERVOUS_SYSTEM	central_nervous_system	glioma	glioblastoma	Female
ACH-000571	T98G	T98G_CENTRAL_NERVOUS_SYSTEM	central_nervous_system	glioma	glioblastoma	Male
ACH-000573	MDAMB436	MDAMB436_BREAST	breast	TNBC		Female
ACH-000576	KMS27	KMS27_HAEMATOPOIETIC_AND_LYMPHOID_TISSUE	multiple_myeloma			Male
ACH-000580	C32	C32_SKIN	skin	melanoma		Male
ACH-000585	EPLC272H	EPLC272H_LUNG	lung	lung_NSC	lung_squamous	Male
ACH-000589	NCIH1437	NCIH1437_LUNG	lung	lung_NSC	lung_adenocarcinoma	Male
ACH-000591	LN235	LN235_CENTRAL_NERVOUS_SYSTEM	central_nervous_system	glioma	astrocytoma	Male
ACH-000593	BC3C	BC3C_URINARY_TRACT	urinary_tract			Female
ACH-000596	LCLC97TM1	LCLC97TM1_LUNG	lung	lung_NSC	lung_large	Male
ACH-000600	SLR26	SLR26_KIDNEY	kidney
ACH-000601	MIAPACA2	MIAPACA2_PANCREAS	pancreas			Male
ACH-000605	TE6	TE6_OESOPHAGUS	esophagus	esophagus_squamous		Male
ACH-000606	PECAPJ34CLONEC12	PECAPJ34CLONEC12_UPPER_AERODIGESTIVE_TRACT	upper_aerodigestive	upper_aerodigestive_squamous		Male
ACH-000608	COV644	COV644_OVARY	ovary	ovary_adenocarcinoma	ovary_mucinous	Female
ACH-000614	RVH421	RVH421_SKIN	skin	melanoma		Male
ACH-000620	JHH1	JHH1_LIVER	liver			Male
ACH-000621	MDAMB157	MDAMB157_BREAST	breast	TNBC		Female
ACH-000622	KNS42	KNS42_CENTRAL_NERVOUS_SYSTEM	central_nervous_system	glioma	glioblastoma	Male
ACH-000624	HCC1806	HCC1806_BREAST	breast	TNBC		Female
ACH-000627	LCLC103H	LCLC103H_LUNG	lung	lung_NSC	lung_large	Male
ACH-000630	YD8	YD8_UPPER_AERODIGESTIVE_TRACT	upper_aerodigestive	upper_aerodigestive_squamous		Female
ACH-000632	HS944T	HS944T_SKIN	skin	melanoma		Male
ACH-000633	FU97	FU97_STOMACH	gastric	gastric_adenocarcinoma	diffuse_gastric	Female
ACH-000637	KYSE520	KYSE520_OESOPHAGUS	esophagus	esophagus_squamous		Female
ACH-000638	NCIH441	NCIH441_LUNG	lung	lung_NSC	lung_adenocarcinoma	Male
ACH-000639	NCIH211	NCIH211_LUNG	lung	lung_small		Female
ACH-000647	TE1	TE1_OESOPHAGUS	esophagus	esophagus_squamous		Male
ACH-000648	NCIH28	NCIH28_PLEURA	mesothelioma			Male
ACH-000649	786O	786O_KIDNEY	kidney			Male
ACH-000651	SW620	SW620_LARGE_INTESTINE	colorectal			Male
ACH-000652	SUIT2	SUIT2_PANCREAS	pancreas			Male
ACH-000653	JJN3	JJN3_HAEMATOPOIETIC_AND_LYMPHOID_TISSUE	multiple_myeloma			Female
ACH-000655	SF268	SF268_CENTRAL_NERVOUS_SYSTEM	central_nervous_system	glioma		Female
ACH-000657	A2780	A2780_OVARY	ovary	ovary_adenocarcinoma	ovary_endometrioid	Female
ACH-000658	KMS18	KMS18_HAEMATOPOIETIC_AND_LYMPHOID_TISSUE	multiple_myeloma			Male
ACH-000661	WM1799	WM1799_SKIN	skin	melanoma		Male
ACH-000662	CORL23	CORL23_LUNG	lung	lung_NSC	lung_large	Male
ACH-000663	OVTOKO	OVTOKO_OVARY	ovary	ovary_adenocarcinoma	ovary_clear_cell	Female
ACH-000665	SKMES1	SKMES1_LUNG	lung	lung_NSC	lung_squamous	Male
ACH-000671	HUH6	HUH6_LIVER	liver	hepatoblastoma		Male
ACH-000673	LN443	LN443_CENTRAL_NERVOUS_SYSTEM	central_nervous_system	glioma	glioblastoma
ACH-000676	LN464	LN464_CENTRAL_NERVOUS_SYSTEM	central_nervous_system	glioma	glioblastoma	Male
ACH-000677	SW1573	SW1573_LUNG	lung	lung_NSC	lung_squamous	Female
ACH-000681	A549	A549_LUNG	lung	lung_NSC	lung_adenocarcinoma	Male
ACH-000684	KMRC1	KMRC1_KIDNEY	kidney			Male
ACH-000688	OV7	OV7_OVARY	ovary	ovary_adenocarcinoma	ovary_clear_cell	Female
ACH-000693	KYSE180	KYSE180_OESOPHAGUS	esophagus	esophagus_squamous		Male
ACH-000694	TE9	TE9_OESOPHAGUS	esophagus	esophagus_squamous		Male
ACH-000696	OVCAR8	OVCAR8_OVARY	ovary	ovary_adenocarcinoma	ovary_high_grade_serous	Female
ACH-000697	A3KAW	A3KAW_HAEMATOPOIETIC_AND_LYMPHOID_TISSUE	lymphoma	DLBCL		Female
ACH-000699	HCC1395	HCC1395_BREAST	breast	TNBC		Female
ACH-000700	NCIH2882	NCIH2882_LUNG	lung	lung_NSC	lung_squamous	Female
ACH-000701	RMUGS	RMUGS_OVARY	ovary	ovary_adenocarcinoma	ovary_mucinous	Female
ACH-000706	EKVX	EKVX_LUNG	lung	lung_NSC	lung_adenocarcinoma	Male
ACH-000711	JIMT1	JIMT1_BREAST	breast	HER2Amp		Female
ACH-000713	CAOV3	CAOV3_OVARY	ovary	ovary_adenocarcinoma	ovary_high_grade_serous	Female
ACH-000718	NCIH2291	NCIH2291_LUNG	lung	lung_NSC	lung_adenocarcinoma	Male
ACH-000720	TCCSUP	TCCSUP_URINARY_TRACT	urinary_tract			Female
ACH-000721	HMC18	HMC18_BREAST	breast			Female
ACH-000724	HT1376	HT1376_URINARY_TRACT	urinary_tract			Female
ACH-000725	HCC202	HCC202_BREAST	breast	HER2Amp		Female
ACH-000732	PECAPJ41CLONED2	PECAPJ41CLONED2_UPPER_AERODIGESTIVE_TRACT	upper_aerodigestive	upper_aerodigestive_squamous		Female
ACH-000734	JHH5	JHH5_LIVER	liver			Male
ACH-000735	PECAPJ49	PECAPJ49_UPPER_AERODIGESTIVE_TRACT	upper_aerodigestive	upper_aerodigestive_squamous		Male
ACH-000736	SNU601	SNU601_STOMACH	gastric	gastric_adenocarcinoma		Male
ACH-000738	GB1	GB1_CENTRAL_NERVOUS_SYSTEM	central_nervous_system	glioma	glioblastoma	Male
ACH-000739	HEPG2	HEPG2_LIVER	liver			Male
ACH-000740	A253	A253_SALIVARY_GLAND	upper_aerodigestive	upper_aerodigestive_squamous		Male
ACH-000746	GSS	GSS_STOMACH	gastric	gastric_adenocarcinoma		Male
ACH-000747	NCIH1703	NCIH1703_LUNG	lung	lung_NSC	lung_adenocarcinoma	Male
ACH-000748	SJSA1	SJSA1_BONE	bone	osteosarcoma		Male
ACH-000753	JMSU1	JMSU1_URINARY_TRACT	urinary_tract			Male
ACH-000756	GI1	GI1_CENTRAL_NERVOUS_SYSTEM	central_nervous_system	glioma		Male
ACH-000757	A427	A427_LUNG	lung	lung_NSC	lung_adenocarcinoma	Male
ACH-000760	LNZ308	LNZ308_CENTRAL_NERVOUS_SYSTEM	central_nervous_system	glioma	glioblastoma
ACH-000762	YD38	YD38_UPPER_AERODIGESTIVE_TRACT	upper_aerodigestive	upper_aerodigestive_squamous		Male
ACH-000763	MM1S	MM1S_HAEMATOPOIETIC_AND_LYMPHOID_TISSUE	multiple_myeloma			Female
ACH-000765	WM983B	WM983B_SKIN	skin	melanoma		Male
ACH-000766	NCIH1648	NCIH1648_LUNG	lung	lung_NSC	lung_adenocarcinoma	Male
ACH-000767	NCIH526	NCIH526_LUNG	lung	lung_small		Male
ACH-000768	MDAMB231	MDAMB231_BREAST	breast	TNBC		Female
ACH-000769	LK2	LK2_LUNG	lung	lung_NSC	lung_squamous	Male
ACH-000771	BICR56	BICR56_UPPER_AERODIGESTIVE_TRACT	upper_aerodigestive	upper_aerodigestive_squamous		Female
ACH-000777	KYSE30	KYSE30_OESOPHAGUS	esophagus	esophagus_squamous		Male
ACH-000778	HSC3	HSC3_UPPER_AERODIGESTIVE_TRACT	upper_aerodigestive	upper_aerodigestive_squamous		Male
ACH-000781	NCIH2023	NCIH2023_LUNG	lung	lung_NSC	lung_adenocarcinoma	Male
ACH-000782	SEM	SEM_HAEMATOPOIETIC_AND_LYMPHOID_TISSUE	leukemia	B-cell_ALL		Female
ACH-000783	CAMA1	CAMA1_BREAST	breast	ERpos		Female
ACH-000784	KYSE70	KYSE70_OESOPHAGUS	esophagus	esophagus_squamous		Male
ACH-000785	NCIH2126	NCIH2126_LUNG	lung	lung_NSC	lung_adenocarcinoma	Male
ACH-000787	LXF289	LXF289_LUNG	lung	lung_NSC	lung_adenocarcinoma	Male
ACH-000788	A2058	A2058_SKIN	skin	melanoma		Male
ACH-000790	SHP77	SHP77_LUNG	lung	lung_small		Male
ACH-000792	BFTC909	BFTC909_KIDNEY	kidney			Male
ACH-000793	KATOIII	KATOIII_STOMACH	gastric	gastric_adenocarcinoma		Male
ACH-000794	BICR22	BICR22_UPPER_AERODIGESTIVE_TRACT	upper_aerodigestive	upper_aerodigestive_squamous		Male
ACH-000799	HS695T	HS695T_SKIN	skin	melanoma		Male
ACH-000800	NCIH446	NCIH446_LUNG	lung	lung_small		Male
ACH-000804	NB1	NB1_AUTONOMIC_GANGLIA	peripheral_nervous_system	neuroblastoma		Male
ACH-000805	COLO679	COLO679_SKIN	skin	melanoma		Female
ACH-000809	KYSE410	KYSE410_OESOPHAGUS	esophagus	esophagus_squamous		Male
ACH-000810	SKMEL30	SKMEL30_SKIN	skin	melanoma		Male
ACH-000811	SKOV3	SKOV3_OVARY	ovary	ovary_adenocarcinoma	ovary_serous	Female
ACH-000817	RPMI8226	RPMI8226_HAEMATOPOIETIC_AND_LYMPHOID_TISSUE	multiple_myeloma			Male
ACH-000819	LN18	LN18_CENTRAL_NERVOUS_SYSTEM	central_nervous_system	glioma	glioblastoma	Male
ACH-000820	SW403	SW403_LARGE_INTESTINE	colorectal			Female
ACH-000823	KYSE140	KYSE140_OESOPHAGUS	esophagus	esophagus_squamous		Male
ACH-000824	KYSE510	KYSE510_OESOPHAGUS	esophagus	esophagus_squamous		Female
ACH-000827	WM793	WM793_SKIN	skin	melanoma		Male
ACH-000831	HEC50B	HEC50B_ENDOMETRIUM	uterus	uterus_endometrium		Female
ACH-000832	CAL27	CAL27_UPPER_AERODIGESTIVE_TRACT	upper_aerodigestive	upper_aerodigestive_squamous		Male
ACH-000833	RH30	RH30_SOFT_TISSUE	rhabdomyosarcoma			Male
ACH-000837	NCIH322	NCIH322_LUNG	lung	lung_NSC	lung_adenocarcinoma	Male
ACH-000838	AMO1	AMO1_HAEMATOPOIETIC_AND_LYMPHOID_TISSUE	multiple_myeloma			Female
ACH-000840	HCC366	HCC366_LUNG	lung	lung_NSC	lung_mixed	Female
ACH-000841	NCIH2087	NCIH2087_LUNG	lung	lung_NSC	lung_adenocarcinoma	Male
ACH-000846	FADU	FADU_UPPER_AERODIGESTIVE_TRACT	upper_aerodigestive	upper_aerodigestive_squamous		Male
ACH-000847	HGC27	HGC27_STOMACH	gastric
ACH-000848	JHH7	JHH7_LIVER	liver			Male
ACH-000849	MDAMB468	MDAMB468_BREAST	breast	TNBC		Female
ACH-000851	MORCPR	MORCPR_LUNG	lung	lung_NSC	lung_adenocarcinoma
ACH-000853	NCIH661	NCIH661_LUNG	lung	lung_NSC	lung_large	Male
ACH-000855	KYSE150	KYSE150_OESOPHAGUS	esophagus	esophagus_squamous		Female
ACH-000856	CAL51	CAL51_BREAST	breast	TNBC		Female
ACH-000858	KNS62	KNS62_LUNG	lung	lung_NSC	lung_squamous	Male
ACH-000859	HCC1954	HCC1954_BREAST	breast	HER2Amp		Female
ACH-000861	HOP62	HOP62_LUNG	lung	lung_NSC	lung_adenocarcinoma	Female
ACH-000865	KYSE450	KYSE450_OESOPHAGUS	esophagus	esophagus_squamous		Male
ACH-000866	NCIH1048	NCIH1048_LUNG	lung	lung_small		Female
ACH-000867	CHAGOK1	CHAGOK1_LUNG	lung	lung_NSC		Male
ACH-000869	NCIH1568	NCIH1568_LUNG	lung	lung_NSC	lung_adenocarcinoma	Female
ACH-000872	HCC515	HCC515_LUNG	lung	lung_NSC	lung_adenocarcinoma	Female
ACH-000876	MDAMB415	MDAMB415_BREAST	breast	ERpos		Female
ACH-000878	HCC15	HCC15_LUNG	lung	lung_NSC	lung_squamous	Male
ACH-000880	AGS	AGS_STOMACH	gastric	gastric_adenocarcinoma		Female
ACH-000881	MELJUSO	MELJUSO_SKIN	skin	melanoma		Female
ACH-000882	IGR1	IGR1_SKIN	skin	melanoma		Male
ACH-000884	MDAMB435S	MDAMB435S_SKIN	skin	melanoma
ACH-000885	TOV21G	TOV21G_OVARY	ovary	ovary_adenocarcinoma	ovary_clear_cell	Female
ACH-000887	SF172	SF172_CENTRAL_NERVOUS_SYSTEM	central_nervous_system	glioma	glioblastoma	Female
ACH-000888	NCIH1793	NCIH1793_LUNG	lung	lung_NSC	lung_adenocarcinoma	Female
ACH-000889	KMM1	KMM1_HAEMATOPOIETIC_AND_LYMPHOID_TISSUE	multiple_myeloma			Male
ACH-000890	SW1271	SW1271_LUNG	lung	lung_small		Male
ACH-000898	SNU719	SNU719_STOMACH	gastric	gastric_adenocarcinoma		Male
ACH-000899	WM88	WM88_SKIN	skin	melanoma		Male
ACH-000900	NCIH23	NCIH23_LUNG	lung	lung_NSC	lung_adenocarcinoma	Male
ACH-000901	HCC1359	HCC1359_LUNG	lung	lung_NSC	lung_large	Female
ACH-000906	ES2	ES2_OVARY	ovary	ovary_adenocarcinoma	ovary_clear_cell	Female
ACH-000907	SNU349	SNU349_KIDNEY	kidney			Male
ACH-000910	MDAMB453	MDAMB453_BREAST	breast	TNBC		Female
ACH-000911	NUGC3	NUGC3_STOMACH	gastric	gastric_adenocarcinoma		Male
ACH-000912	NCIH2286	NCIH2286_LUNG	lung	lung_small		Female
ACH-000913	ESS1	ESS1_ENDOMETRIUM	uterus	uterus_endometrium		Female
ACH-000915	IPC298	IPC298_SKIN	skin	melanoma		Female
ACH-000916	NCIH1573	NCIH1573_LUNG	lung	lung_NSC	lung_adenocarcinoma	Female
ACH-000917	TE4	TE4_OESOPHAGUS	esophagus	esophagus_squamous		Female
ACH-000921	NCIH1339	NCIH1339_LUNG	lung	lung_small		Female
ACH-000924	NCIH2172	NCIH2172_LUNG	lung	lung_NSC		Female
ACH-000926	HT55	HT55_LARGE_INTESTINE	colorectal
ACH-000929	NCIH2110	NCIH2110_LUNG	lung	lung_NSC
ACH-000932	SNU1	SNU1_STOMACH	gastric			Male
ACH-000935	MDST8	MDST8_LARGE_INTESTINE	colorectal
ACH-000936	EFO27	EFO27_OVARY	ovary	ovary_adenocarcinoma	ovary_endometrioid	Female
ACH-000938	NALM6	NALM6_HAEMATOPOIETIC_AND_LYMPHOID_TISSUE	leukemia	B-cell_ALL		Male
ACH-000943	RKO	RKO_LARGE_INTESTINE	colorectal	colorectal_MSI
ACH-000946	HEC265	HEC265_ENDOMETRIUM	uterus	uterus_endometrium		Female
ACH-000948	2313287	2313287_STOMACH	gastric	gastric_adenocarcinoma		Male
ACH-000950	LOVO	LOVO_LARGE_INTESTINE	colorectal	colorectal_MSI		Male
ACH-000953	SUPT1	SUPT1_HAEMATOPOIETIC_AND_LYMPHOID_TISSUE	leukemia	T-cell_ALL		Male
ACH-000957	LS180	LS180_LARGE_INTESTINE	colorectal	colorectal_MSI		Female
ACH-000958	SW48	SW48_LARGE_INTESTINE	colorectal	colorectal_MSI		Female
ACH-000960	REH	REH_HAEMATOPOIETIC_AND_LYMPHOID_TISSUE	leukemia	B-cell_ALL		Female
ACH-000963	CCK81	CCK81_LARGE_INTESTINE	colorectal	colorectal_MSI		Female
ACH-000965	RL952	RL952_ENDOMETRIUM	uterus	uterus_endometrium		Female
ACH-000969	KM12	KM12_LARGE_INTESTINE	colorectal	colorectal_MSI
ACH-000974	SNGM	SNGM_ENDOMETRIUM	uterus	uterus_endometrium		Female
ACH-000975	HCC2450	HCC2450_LUNG	lung	lung_NSC	lung_adenocarcinoma	Male
ACH-000978	EN	EN_ENDOMETRIUM	uterus	uterus_endometrium		Female
ACH-000980	NCIH1155	NCIH1155_LUNG	lung	lung_NSC	lung_large	Male
ACH-000984	HEC6	HEC6_ENDOMETRIUM	uterus	uterus_endometrium		Female
ACH-000986	HT115	HT115_LARGE_INTESTINE	colorectal
ACH-000988	MFE319	MFE319_ENDOMETRIUM	uterus	uterus_endometrium		Female
ACH-000994	HEC59	HEC59_ENDOMETRIUM	uterus	uterus_endometrium		Female
ACH-000996	HEC251	HEC251_ENDOMETRIUM	uterus	uterus_endometrium		Female
ACH-001001	143B	143B_BONE	bone	osteosarcoma		Female
ACH-001020	BT16	BT16_SOFT_TISSUE	rhabdoid			Male
ACH-001048	COV504	COV504_OVARY	ovary	ovary_adenocarcinoma	ovary_high_grade_serous	Female
ACH-001050	CW9019	CW9019_SOFT_TISSUE	rhabdomyosarcoma
ACH-001053	D425	D425_CENTRAL_NERVOUS_SYSTEM	central_nervous_system	medulloblastoma	med_group_3
ACH-001054	D458	D458_CENTRAL_NERVOUS_SYSTEM	central_nervous_system	medulloblastoma	med_group_3
ACH-001061	DLD1	DLD1_LARGE_INTESTINE	colorectal			Male
ACH-001075	NCIH292	NCIH292_LUNG	lung	lung_NSC		Female
ACH-001096	JR	JR_SOFT_TISSUE	rhabdomyosarcoma
ACH-001190	SKMEL2	SKMEL2_SKIN	skin	melanoma		Male
ACH-001192	SKNEP1	SKNEP1_BONE	bone	Ewing_sarcoma		Female
ACH-001196	SMSCTR	SMSCTR_SOFT_TISSUE	rhabdomyosarcoma			Male
ACH-001211	TTC549	TTC549_SOFT_TISSUE	rhabdoid			Female
ACH-001239	WM2664	WM2664_SKIN	skin	melanoma		Female
ACH-001275	SYO1	SYO1_SOFT_TISSUE	soft_tissue	synovial_sarcoma		Female
ACH-001306	8305C	8305C_THYROID	thyroid			Female
ACH-001318	PLCPRF5	PLCPRF5_LIVER	liver			Male
ACH-001390	SUM149PT	SUM149PT_BREAST	breast	TNBC		Female
ACH-001391	SUM159PT	SUM159PT_BREAST	breast	TNBC		Female
