# Supplementary material for: shinyDepMap, a tool to identify targetable cancer genes and their functional connections from Cancer Dependency Map data
Source: eLife. 2021 Feb 8;10:e57116. doi: 10.7554/eLife.57116 (PMC7924953; doi:10.7554/eLife.57116)
Supplement: Figure 3—source data 1. [file elife-57116-fig3-data1.xlsx]

## Sheet: shRNA
EntrezID	GeneSymbol	q1.efficacy	q1.selectivity	q1.isEssential	q2.5.efficacy	q2.5.selectivity	q2.5.isEssential	q5.efficacy	q5.selectivity	q5.isEssential	q10.efficacy	q10.selectivity	q10.isEssential	q25.efficacy	q25.selectivity	q25.isEssential
1	A1BG	-0.464	0.122	FALSE	-0.351	0.113	FALSE	-0.3	0.131	FALSE	-0.22	0.073	FALSE	-0.108	-0.159	FALSE
29974	A1CF	-0.497	0.102	FALSE	-0.451	0.127	FALSE	-0.349	0.105	FALSE	-0.276	0.069	FALSE	-0.169	0.088	FALSE
2	A2M	-0.48	-0.038	FALSE	-0.385	-0.033	FALSE	-0.347	-0.029	FALSE	-0.274	-0.067	FALSE	-0.153	-0.225	FALSE
144568	A2ML1	-0.379	0.516	FALSE	-0.262	0.618	FALSE	-0.193	0.651	FALSE	-0.095	0.828	FALSE	-0.02	1.249	FALSE
53947	A4GALT	-0.411	0.193	FALSE	-0.309	0.169	FALSE	-0.217	0.155	FALSE	-0.138	0.133	FALSE	-0.028	0.059	FALSE
51146	A4GNT	-0.305	-0.131	FALSE	-0.224	-0.133	FALSE	-0.177	-0.141	FALSE	-0.123	-0.169	FALSE	-0.039	-0.341	FALSE
8086	AAAS	-0.702	0.044	TRUE	-0.52	-0.013	TRUE	-0.431	-0.03	TRUE	-0.365	-0.034	TRUE	-0.255	0.002	TRUE
65985	AACS	-0.49	0.168	FALSE	-0.447	0.239	FALSE	-0.31	0.239	FALSE	-0.183	0.241	FALSE	-0.048	0.068	FALSE
13	AADAC	-0.57	0.26	TRUE	-0.502	0.304	TRUE	-0.431	0.397	TRUE	-0.342	0.482	TRUE	-0.177	0.365	TRUE
344752	AADACL2	-0.485	-0.008	FALSE	-0.425	-0.062	FALSE	-0.342	-0.058	FALSE	-0.266	-0.179	FALSE	-0.086	-0.554	FALSE
343066	AADACL4	-0.379	0.061	FALSE	-0.284	0.072	FALSE	-0.199	-0.053	FALSE	-0.132	-0.169	FALSE	-0.032	-0.851	FALSE
51166	AADAT	-0.345	0.359	FALSE	-0.284	0.418	FALSE	-0.236	0.393	FALSE	-0.14	0.439	FALSE	-0.032	0.559	FALSE
195827	PRXL2C	-0.393	0.016	FALSE	-0.261	-0.012	FALSE	-0.214	-0.008	FALSE	-0.126	-0.034	FALSE	-0.028	-0.54	FALSE
79719	AAGAB	-0.406	-0.249	FALSE	-0.348	-0.232	FALSE	-0.284	-0.227	FALSE	-0.21	-0.379	FALSE	-0.099	-0.502	FALSE
22848	AAK1	-0.167	-0.077	FALSE	-0.121	-0.081	FALSE	-0.093	-0.077	FALSE	-0.054	0.013	FALSE	0.021	0.058	FALSE
28971	AAMDC	-0.325	-0.133	FALSE	-0.3	-0.123	FALSE	-0.248	-0.14	FALSE	-0.186	-0.265	FALSE	-0.072	-0.639	FALSE
14	AAMP	-1.213	0.109	TRUE	-1.118	0.131	TRUE	-0.987	0.14	TRUE	-0.822	0.155	TRUE	-0.597	0.224	TRUE
15	AANAT	-0.374	0.099	FALSE	-0.31	0.002	FALSE	-0.238	0.022	FALSE	-0.175	0.01	FALSE	-0.086	-0.007	FALSE
25980	AAR2	-0.353	0.021	FALSE	-0.275	0.02	FALSE	-0.217	0.02	FALSE	-0.158	-0.004	FALSE	-0.04	-0.752	FALSE
441376	AARD	-0.123	0.222	FALSE	-0.077	0.244	FALSE	-0.055	0.344	FALSE	-0.042	0.589	FALSE	-0.031	1.05	FALSE
16	AARS	-0.729	0.16	TRUE	-0.682	0.269	TRUE	-0.639	0.346	TRUE	-0.595	0.527	TRUE	-0.346	0.748	TRUE
57505	AARS2	-0.561	0.012	TRUE	-0.487	0.067	TRUE	-0.409	0.064	TRUE	-0.351	0.098	TRUE	-0.232	0.049	TRUE
132949	AASDH	-0.426	0.181	FALSE	-0.318	0.137	FALSE	-0.252	0.195	FALSE	-0.176	0.182	FALSE	-0.055	0.122	FALSE
60496	AASDHPPT	-0.295	0.107	FALSE	-0.259	0.169	FALSE	-0.231	0.322	FALSE	-0.169	0.393	FALSE	-0.093	0.701	FALSE
10157	AASS	-0.4	-0.159	FALSE	-0.319	-0.131	FALSE	-0.273	-0.114	FALSE	-0.205	-0.122	FALSE	-0.12	-0.22	FALSE
26574	AATF	-0.736	-0.107	TRUE	-0.678	-0.081	TRUE	-0.576	-0.102	TRUE	-0.5	-0.1	TRUE	-0.403	-0.106	TRUE
9625	AATK	-0.6	0.038	TRUE	-0.552	0.046	TRUE	-0.456	-0.013	TRUE	-0.398	0.038	TRUE	-0.277	0.013	TRUE
18	ABAT	-0.356	0	FALSE	-0.334	0.058	FALSE	-0.295	0.104	FALSE	-0.202	0.088	FALSE	-0.107	0.052	FALSE
19	ABCA1	-0.634	0.306	TRUE	-0.522	0.355	TRUE	-0.453	0.35	TRUE	-0.353	0.279	TRUE	-0.235	0.234	TRUE
10349	ABCA10	-0.512	-0.07	FALSE	-0.454	-0.066	FALSE	-0.402	-0.026	FALSE	-0.331	-0.018	FALSE	-0.233	-0.001	FALSE
26154	ABCA12	-0.474	0.081	FALSE	-0.41	0.142	FALSE	-0.354	0.119	FALSE	-0.266	0.071	FALSE	-0.184	0.114	FALSE
154664	ABCA13	-0.316	0.119	FALSE	-0.269	0.161	FALSE	-0.187	0.211	FALSE	-0.093	0.247	FALSE	0.004	0.268	FALSE
20	ABCA2	-0.36	-0.095	FALSE	-0.268	-0.085	FALSE	-0.216	-0.055	FALSE	-0.153	-0.067	FALSE	-0.081	-0.051	FALSE
21	ABCA3	-0.44	0.16	FALSE	-0.329	0.046	FALSE	-0.287	0.036	FALSE	-0.209	0.074	FALSE	-0.109	0.215	FALSE
24	ABCA4	-0.372	0.25	FALSE	-0.346	0.257	FALSE	-0.278	0.269	FALSE	-0.178	0.314	FALSE	-0.067	0.331	FALSE
23461	ABCA5	-0.343	0.287	FALSE	-0.238	0.231	FALSE	-0.195	0.254	FALSE	-0.123	0.34	FALSE	-0.007	0.365	FALSE
23460	ABCA6	-0.26	-0.184	FALSE	-0.236	-0.185	FALSE	-0.164	-0.176	FALSE	-0.117	-0.204	FALSE	-0.061	-0.189	FALSE
10347	ABCA7	-0.3	-0.06	FALSE	-0.25	-0.05	FALSE	-0.175	-0.05	FALSE	-0.114	-0.033	FALSE	-0.039	0.016	FALSE
10351	ABCA8	-0.218	-0.074	FALSE	-0.189	-0.059	FALSE	-0.146	-0.07	FALSE	-0.097	-0.074	FALSE	-0.03	-0.158	FALSE
10350	ABCA9	-0.239	0.057	FALSE	-0.188	0.124	FALSE	-0.119	0.027	FALSE	-0.067	0.081	FALSE	-0.004	0.193	FALSE
5243	ABCB1	-0.246	-0.127	FALSE	-0.184	-0.096	FALSE	-0.138	-0.068	FALSE	-0.101	0.007	FALSE	-0.039	0.059	FALSE
23456	ABCB10	-0.609	0.158	TRUE	-0.467	0.134	TRUE	-0.354	0.156	TRUE	-0.286	0.156	TRUE	-0.171	0.16	TRUE
8647	ABCB11	-0.59	0.052	TRUE	-0.365	-0.027	TRUE	-0.295	-0.074	TRUE	-0.233	-0.063	TRUE	-0.162	0.041	TRUE
5244	ABCB4	-0.524	0.055	FALSE	-0.436	0.033	FALSE	-0.369	0.002	FALSE	-0.279	-0.035	FALSE	-0.19	0.002	FALSE
340273	ABCB5	-0.675	0.323	TRUE	-0.542	0.409	TRUE	-0.427	0.484	TRUE	-0.327	0.416	TRUE	-0.179	0.558	TRUE
10058	ABCB6	-0.3	-0.085	FALSE	-0.209	-0.137	FALSE	-0.167	-0.138	FALSE	-0.12	-0.09	FALSE	-0.056	0.016	FALSE
22	ABCB7	-1.582	-0.07	TRUE	-1.414	-0.029	TRUE	-1.245	-0.018	TRUE	-1.093	-0.041	TRUE	-0.897	-0.077	TRUE
11194	ABCB8	-0.312	0.11	FALSE	-0.224	0.096	FALSE	-0.139	0.094	FALSE	-0.085	0.142	FALSE	-0.001	0.246	FALSE
23457	ABCB9	-0.694	-0.01	TRUE	-0.654	0.03	TRUE	-0.543	0.019	TRUE	-0.43	0.008	TRUE	-0.317	0.025	TRUE
4363	ABCC1	-0.307	0.145	FALSE	-0.232	0.064	FALSE	-0.177	0.077	FALSE	-0.122	0.059	FALSE	-0.026	0.059	FALSE
89845	ABCC10	-0.229	0.175	FALSE	-0.177	0.204	FALSE	-0.122	0.286	FALSE	-0.034	0.405	FALSE	0.059	0.636	FALSE
85320	ABCC11	-0.335	-0.125	FALSE	-0.273	-0.07	FALSE	-0.211	-0.084	FALSE	-0.14	-0.084	FALSE	-0.049	-0.116	FALSE
94160	ABCC12	-0.376	-0.024	FALSE	-0.34	-0.004	FALSE	-0.275	-0.03	FALSE	-0.199	-0.038	FALSE	-0.126	0.086	FALSE
1244	ABCC2	-0.329	-0.094	FALSE	-0.285	0	FALSE	-0.233	0.036	FALSE	-0.177	0.027	FALSE	-0.111	0.091	FALSE
8714	ABCC3	-0.466	0.217	FALSE	-0.377	0.275	FALSE	-0.307	0.231	FALSE	-0.241	0.257	FALSE	-0.125	0.381	FALSE
10257	ABCC4	-0.474	-0.172	FALSE	-0.372	-0.177	FALSE	-0.348	-0.096	FALSE	-0.285	-0.058	FALSE	-0.19	0.009	FALSE
10057	ABCC5	-0.384	-0.091	FALSE	-0.346	-0.069	FALSE	-0.31	-0.006	FALSE	-0.257	0.06	FALSE	-0.17	0.158	FALSE
368	ABCC6	-0.251	-0.199	FALSE	-0.213	-0.131	FALSE	-0.16	-0.098	FALSE	-0.105	-0.072	FALSE	-0.033	0.001	FALSE
6833	ABCC8	-0.354	0.106	FALSE	-0.285	0.098	FALSE	-0.25	0.15	FALSE	-0.185	0.163	FALSE	-0.073	0.237	FALSE
10060	ABCC9	-0.329	0.145	FALSE	-0.223	0.24	FALSE	-0.167	0.286	FALSE	-0.085	0.283	FALSE	-0.004	0.454	FALSE
215	ABCD1	-0.839	0.235	TRUE	-0.786	0.228	TRUE	-0.699	0.275	TRUE	-0.587	0.259	TRUE	-0.425	0.285	TRUE
225	ABCD2	-0.432	-0.081	FALSE	-0.365	-0.093	FALSE	-0.321	-0.058	FALSE	-0.251	-0.028	FALSE	-0.16	0.04	FALSE
5825	ABCD3	-0.341	0.171	FALSE	-0.281	0.218	FALSE	-0.225	0.276	FALSE	-0.17	0.353	FALSE	-0.051	0.497	FALSE
5826	ABCD4	-0.34	-0.144	FALSE	-0.273	-0.155	FALSE	-0.245	-0.129	FALSE	-0.193	-0.108	FALSE	-0.107	-0.148	FALSE
6059	ABCE1	-2.336	0.096	TRUE	-2.032	0.155	TRUE	-1.84	0.227	TRUE	-1.717	0.341	TRUE	-1.458	-0.044	TRUE
23	ABCF1	-0.913	0.026	TRUE	-0.686	-0.097	TRUE	-0.616	-0.146	TRUE	-0.531	-0.179	TRUE	-0.433	-0.213	TRUE
10061	ABCF2	-0.327	-0.082	FALSE	-0.256	-0.063	FALSE	-0.196	-0.084	FALSE	-0.144	-0.07	FALSE	-0.074	-0.009	FALSE
55324	ABCF3	-0.452	-0.023	FALSE	-0.388	-0.053	FALSE	-0.299	-0.07	FALSE	-0.238	-0.068	FALSE	-0.143	-0.081	FALSE
9619	ABCG1	-0.362	0.017	FALSE	-0.272	-0.028	FALSE	-0.219	-0.038	FALSE	-0.172	-0.038	FALSE	-0.105	-0.07	FALSE
9429	ABCG2	-0.38	-0.114	FALSE	-0.347	-0.045	FALSE	-0.304	-0.013	FALSE	-0.23	0	FALSE	-0.146	-0.005	FALSE
64137	ABCG4	-0.273	-0.042	FALSE	-0.244	0.019	FALSE	-0.177	0.05	FALSE	-0.124	0.062	FALSE	-0.048	0.153	FALSE
64240	ABCG5	-0.33	-0.015	FALSE	-0.227	-0.018	FALSE	-0.175	-0.039	FALSE	-0.138	-0.078	FALSE	-0.081	0.008	FALSE
64241	ABCG8	-0.328	-0.135	FALSE	-0.27	-0.141	FALSE	-0.226	-0.108	FALSE	-0.152	-0.14	FALSE	-0.065	-0.155	FALSE
55347	ABHD10	-0.537	0.047	FALSE	-0.493	0.149	FALSE	-0.426	0.193	FALSE	-0.347	0.199	FALSE	-0.187	0.021	FALSE
83451	ABHD11	-0.312	0.242	FALSE	-0.265	0.337	FALSE	-0.227	0.401	FALSE	-0.18	0.519	FALSE	-0.107	0.942	FALSE
26090	ABHD12	-1.071	0.316	TRUE	-0.93	0.325	TRUE	-0.803	0.358	TRUE	-0.702	0.471	TRUE	-0.47	0.713	TRUE
145447	ABHD12B	-0.306	-0.069	FALSE	-0.233	-0.118	FALSE	-0.184	-0.137	FALSE	-0.135	-0.147	FALSE	-0.065	-0.252	FALSE
84945	ABHD13	-0.423	-0.098	FALSE	-0.343	-0.047	FALSE	-0.286	-0.024	FALSE	-0.197	0.002	FALSE	-0.087	0.035	FALSE
25864	ABHD14A	-0.309	0.335	FALSE	-0.216	0.094	FALSE	-0.159	0.151	FALSE	-0.094	0.212	FALSE	-0.026	0.346	FALSE
84836	ABHD14B	-0.3	0.013	FALSE	-0.196	0.019	FALSE	-0.157	0.038	FALSE	-0.082	0.021	FALSE	-0.025	0.019	FALSE
116236	ABHD15	-0.412	-0.144	FALSE	-0.347	-0.16	FALSE	-0.292	-0.199	FALSE	-0.226	-0.313	FALSE	-0.091	-0.568	FALSE
7920	ABHD16A	-0.349	-0.209	FALSE	-0.287	-0.206	FALSE	-0.245	-0.263	FALSE	-0.207	-0.246	FALSE	-0.128	-0.363	FALSE
140701	ABHD16B	-0.251	-0.14	FALSE	-0.2	-0.234	FALSE	-0.163	-0.242	FALSE	-0.116	-0.259	FALSE	-0.039	-0.396	FALSE
81926	ABHD17A	-0.312	0.069	FALSE	-0.258	0.031	FALSE	-0.234	0.013	FALSE	-0.196	0.008	FALSE	-0.119	-0.045	FALSE
51104	ABHD17B	-0.322	0.297	FALSE	-0.204	0.377	FALSE	-0.13	0.409	FALSE	-0.065	0.512	FALSE	-0.02	0.811	FALSE
11057	ABHD2	-0.455	-0.109	FALSE	-0.367	-0.112	FALSE	-0.325	-0.127	FALSE	-0.256	-0.161	FALSE	-0.176	-0.148	FALSE
171586	ABHD3	-0.393	-0.107	FALSE	-0.303	-0.166	FALSE	-0.248	-0.201	FALSE	-0.2	-0.21	FALSE	-0.116	-0.36	FALSE
63874	ABHD4	-0.466	0.049	FALSE	-0.333	0.076	FALSE	-0.267	0.051	FALSE	-0.202	0.085	FALSE	-0.107	0.017	FALSE
51099	ABHD5	-0.446	0.03	FALSE	-0.351	-0.014	FALSE	-0.268	-0.039	FALSE	-0.208	-0.058	FALSE	-0.105	-0.124	FALSE
57406	ABHD6	-0.224	0.01	FALSE	-0.163	-0.028	FALSE	-0.141	-0.014	FALSE	-0.075	-0.126	FALSE	-0.024	-0.604	FALSE
79575	ABHD8	-0.229	-0.097	FALSE	-0.175	-0.099	FALSE	-0.12	-0.115	FALSE	-0.067	-0.09	FALSE	-0.024	-0.076	FALSE
10006	ABI1	-0.614	0.034	TRUE	-0.478	0.039	TRUE	-0.363	0.02	TRUE	-0.258	0.004	TRUE	-0.124	-0.102	TRUE
10152	ABI2	-0.45	-0.159	FALSE	-0.262	-0.231	FALSE	-0.184	-0.29	FALSE	-0.115	-0.392	FALSE	-0.029	-0.908	FALSE
51225	ABI3	-0.477	0.11	FALSE	-0.388	0.113	FALSE	-0.281	-0.008	FALSE	-0.204	-0.063	FALSE	-0.026	-0.888	FALSE
25	ABL1	-0.392	-0.129	FALSE	-0.364	-0.09	FALSE	-0.288	-0.087	FALSE	-0.252	-0.075	FALSE	-0.178	-0.132	FALSE
27	ABL2	-0.448	0.252	FALSE	-0.384	0.208	FALSE	-0.325	0.198	FALSE	-0.237	0.223	FALSE	-0.138	0.317	FALSE
3983	ABLIM1	-0.393	0.046	FALSE	-0.311	0.056	FALSE	-0.244	0.038	FALSE	-0.18	0.041	FALSE	-0.079	-0.131	FALSE
84448	ABLIM2	-0.391	-0.025	FALSE	-0.305	0.02	FALSE	-0.255	-0.041	FALSE	-0.188	-0.156	FALSE	-0.048	-0.799	FALSE
22885	ABLIM3	-0.555	0.1	TRUE	-0.463	0.128	TRUE	-0.413	0.121	TRUE	-0.342	0.172	TRUE	-0.228	0.09	TRUE
29	ABR	-0.455	0.176	FALSE	-0.397	0.239	FALSE	-0.281	0.315	FALSE	-0.196	0.381	FALSE	-0.086	0.421	FALSE
137735	ABRA	-0.274	0.182	FALSE	-0.213	0.044	FALSE	-0.171	-0.017	FALSE	-0.12	-0.013	FALSE	-0.037	-0.202	FALSE
84142	ABRAXAS1	-0.332	-0.025	FALSE	-0.285	0.001	FALSE	-0.233	0.006	FALSE	-0.172	0.043	FALSE	-0.071	-0.077	FALSE
23172	ABRAXAS2	-0.489	-0.163	FALSE	-0.417	-0.222	FALSE	-0.375	-0.243	FALSE	-0.303	-0.218	FALSE	-0.188	-0.045	FALSE
29777	ABT1	-0.462	0.023	FALSE	-0.37	-0.012	FALSE	-0.319	-0.027	FALSE	-0.253	-0.064	FALSE	-0.166	-0.175	FALSE
80325	ABTB1	-0.436	-0.118	FALSE	-0.335	-0.172	FALSE	-0.29	-0.139	FALSE	-0.238	-0.221	FALSE	-0.158	-0.213	FALSE
25841	ABTB2	-0.265	-0.052	FALSE	-0.213	-0.1	FALSE	-0.153	-0.117	FALSE	-0.109	-0.108	FALSE	-0.026	-0.189	FALSE
30	ACAA1	-0.251	-0.042	FALSE	-0.21	0.027	FALSE	-0.179	0.084	FALSE	-0.124	0.087	FALSE	-0.041	0.187	FALSE
10449	ACAA2	-0.233	0.089	FALSE	-0.152	0.135	FALSE	-0.082	0.214	FALSE	-0.034	0.299	FALSE	-0.024	0.731	FALSE
31	ACACA	-0.578	0.113	TRUE	-0.438	0.163	TRUE	-0.357	0.137	TRUE	-0.288	0.12	TRUE	-0.161	0.136	TRUE
32	ACACB	-0.62	0.123	TRUE	-0.455	0.08	TRUE	-0.391	0.109	TRUE	-0.304	0.112	TRUE	-0.18	0.206	TRUE
80724	ACAD10	-0.562	0.071	TRUE	-0.502	0.097	TRUE	-0.42	0.095	TRUE	-0.348	0.164	TRUE	-0.252	0.276	TRUE
84129	ACAD11	-0.545	0.129	TRUE	-0.445	0.195	TRUE	-0.342	0.176	TRUE	-0.279	0.205	TRUE	-0.16	0.285	TRUE
27034	ACAD8	-0.31	-0.049	FALSE	-0.239	-0.071	FALSE	-0.17	-0.06	FALSE	-0.118	-0.057	FALSE	-0.055	0.016	FALSE
28976	ACAD9	-0.563	-0.094	TRUE	-0.463	-0.039	TRUE	-0.393	-0.034	TRUE	-0.345	0.014	TRUE	-0.231	-0.002	TRUE
33	ACADL	-0.472	0.185	FALSE	-0.402	0.163	FALSE	-0.304	0.224	FALSE	-0.214	0.248	FALSE	-0.087	0.257	FALSE
34	ACADM	-0.46	0.125	FALSE	-0.377	0.15	FALSE	-0.318	0.202	FALSE	-0.262	0.305	FALSE	-0.147	0.496	FALSE
35	ACADS	-0.561	-0.025	TRUE	-0.47	-0.038	TRUE	-0.417	0.017	TRUE	-0.342	0.006	TRUE	-0.217	0.038	TRUE
36	ACADSB	-0.459	0.074	FALSE	-0.39	0.106	FALSE	-0.299	0.054	FALSE	-0.208	0.042	FALSE	-0.116	0.168	FALSE
37	ACADVL	-0.445	-0.06	FALSE	-0.349	-0.024	FALSE	-0.293	-0.017	FALSE	-0.206	0.005	FALSE	-0.11	0	FALSE
176	ACAN	-0.367	0.196	FALSE	-0.259	0.195	FALSE	-0.197	0.102	FALSE	-0.11	-0.013	FALSE	-0.029	-0.125	FALSE
9744	ACAP1	-0.447	-0.158	FALSE	-0.408	-0.137	FALSE	-0.339	-0.135	FALSE	-0.259	-0.165	FALSE	-0.189	-0.074	FALSE
23527	ACAP2	-0.304	-0.169	FALSE	-0.236	-0.13	FALSE	-0.192	-0.112	FALSE	-0.141	-0.186	FALSE	-0.068	-0.222	FALSE
116983	ACAP3	-0.415	0.034	FALSE	-0.36	0.068	FALSE	-0.278	0.064	FALSE	-0.195	0.073	FALSE	-0.081	0.05	FALSE
38	ACAT1	-0.456	0.118	FALSE	-0.421	0.144	FALSE	-0.338	0.231	FALSE	-0.262	0.237	FALSE	-0.133	0.418	FALSE
39	ACAT2	-0.58	0.057	TRUE	-0.49	0.094	TRUE	-0.412	0.096	TRUE	-0.322	0.037	TRUE	-0.2	0.003	TRUE
64746	ACBD3	-0.358	0.183	FALSE	-0.299	0.213	FALSE	-0.239	0.276	FALSE	-0.18	0.279	FALSE	-0.053	0.171	FALSE
79777	ACBD4	-0.204	-0.075	FALSE	-0.127	-0.203	FALSE	-0.086	-0.13	FALSE	-0.048	-0.169	FALSE	-0.026	-0.389	FALSE
91452	ACBD5	-0.498	0.114	FALSE	-0.29	-0.025	FALSE	-0.237	0.008	FALSE	-0.17	0.075	FALSE	-0.092	0.169	FALSE
84320	ACBD6	-0.29	0.028	FALSE	-0.189	0.043	FALSE	-0.086	-0.05	FALSE	-0.033	-0.081	FALSE	-0.023	-0.237	FALSE
84680	ACCS	-0.519	0.04	FALSE	-0.432	-0.042	FALSE	-0.395	0.009	FALSE	-0.291	-0.022	FALSE	-0.211	0.018	FALSE
390110	ACCSL	-0.35	-0.154	FALSE	-0.3	-0.132	FALSE	-0.241	-0.153	FALSE	-0.175	-0.217	FALSE	-0.085	-0.298	FALSE
65057	ACD	-0.286	0.155	FALSE	-0.244	0.127	FALSE	-0.2	0.177	FALSE	-0.16	0.244	FALSE	-0.114	0.271	FALSE
1636	ACE	-0.217	-0.049	FALSE	-0.142	-0.019	FALSE	-0.08	-0.049	FALSE	-0.047	0.071	FALSE	-0.027	0.375	FALSE
59272	ACE2	-0.328	0.058	FALSE	-0.275	0.119	FALSE	-0.206	0.076	FALSE	-0.149	0.076	FALSE	-0.055	0.018	FALSE
125981	ACER1	-0.286	-0.144	FALSE	-0.254	-0.099	FALSE	-0.197	-0.12	FALSE	-0.154	-0.086	FALSE	-0.06	-0.136	FALSE
340485	ACER2	-0.405	0.182	FALSE	-0.356	0.243	FALSE	-0.306	0.273	FALSE	-0.25	0.231	FALSE	-0.146	-0.013	FALSE
55331	ACER3	-0.476	0.013	FALSE	-0.435	0.005	FALSE	-0.374	0.002	FALSE	-0.303	-0.027	FALSE	-0.19	-0.055	FALSE
43	ACHE	-0.431	0.047	FALSE	-0.311	0.057	FALSE	-0.277	0.109	FALSE	-0.212	0.107	FALSE	-0.112	0.106	FALSE
22985	ACIN1	-0.649	-0.037	TRUE	-0.537	-0.069	TRUE	-0.47	-0.03	TRUE	-0.388	0.05	TRUE	-0.282	0.119	TRUE
2532	ACKR1	-0.443	0.086	FALSE	-0.396	0.115	FALSE	-0.294	0.068	FALSE	-0.231	0.102	FALSE	-0.083	-0.026	FALSE
1238	ACKR2	-0.486	0.055	FALSE	-0.384	0.063	FALSE	-0.281	-0.004	FALSE	-0.235	0.07	FALSE	-0.122	0.073	FALSE
57007	ACKR3	-0.544	-0.05	FALSE	-0.447	-0.07	FALSE	-0.394	-0.066	FALSE	-0.334	-0.029	FALSE	-0.234	-0.028	FALSE
51554	ACKR4	-0.547	0.052	TRUE	-0.409	-0.07	TRUE	-0.337	-0.053	TRUE	-0.261	-0.091	TRUE	-0.167	-0.094	TRUE
47	ACLY	-1.009	0.103	TRUE	-0.897	0.107	TRUE	-0.789	0.143	TRUE	-0.675	0.178	TRUE	-0.489	0.251	TRUE
130013	ACMSD	-0.45	0.162	FALSE	-0.378	0.208	FALSE	-0.286	0.233	FALSE	-0.217	0.169	FALSE	-0.091	0.129	FALSE
48	ACO1	-0.43	-0.051	FALSE	-0.372	0.002	FALSE	-0.314	0.048	FALSE	-0.235	0.095	FALSE	-0.121	0.147	FALSE
50	ACO2	-1.182	0.119	TRUE	-1.044	0.116	TRUE	-0.947	0.143	TRUE	-0.794	0.207	TRUE	-0.569	0.355	TRUE
641371	ACOT1	-0.43	-0.021	FALSE	-0.363	0.012	FALSE	-0.299	0.06	FALSE	-0.224	0.128	FALSE	-0.135	0.266	FALSE
26027	ACOT11	-0.615	-0.07	TRUE	-0.554	-0.003	TRUE	-0.494	0.016	TRUE	-0.43	-0.018	TRUE	-0.295	-0.011	TRUE
134526	ACOT12	-0.366	0.151	FALSE	-0.28	0	FALSE	-0.208	0.001	FALSE	-0.157	0.015	FALSE	-0.071	0.049	FALSE
55856	ACOT13	-0.435	0.077	FALSE	-0.328	0.075	FALSE	-0.271	0.116	FALSE	-0.208	0.12	FALSE	-0.083	-0.072	FALSE
10965	ACOT2	-0.229	0.096	FALSE	-0.162	0.184	FALSE	-0.097	0.267	FALSE	-0.052	0.428	FALSE	0.028	0.695	FALSE
122970	ACOT4	-0.202	0.153	FALSE	-0.149	0.08	FALSE	-0.098	0.11	FALSE	-0.067	0.209	FALSE	-0.028	0.459	FALSE
11332	ACOT7	-0.289	0.14	FALSE	-0.265	0.124	FALSE	-0.222	0.126	FALSE	-0.152	0.15	FALSE	-0.059	0.157	FALSE
10005	ACOT8	-0.804	0.252	TRUE	-0.72	0.204	TRUE	-0.638	0.058	TRUE	-0.584	0.124	TRUE	-0.441	0.63	TRUE
23597	ACOT9	-0.382	-0.039	FALSE	-0.267	-0.095	FALSE	-0.223	-0.085	FALSE	-0.163	-0.049	FALSE	-0.083	-0.034	FALSE
51	ACOX1	-0.419	0.02	FALSE	-0.33	-0.028	FALSE	-0.292	0.011	FALSE	-0.233	0.009	FALSE	-0.135	-0.045	FALSE
8309	ACOX2	-0.277	0.009	FALSE	-0.216	0.013	FALSE	-0.159	0.043	FALSE	-0.098	0.06	FALSE	-0.024	0.084	FALSE
8310	ACOX3	-0.575	-0.02	TRUE	-0.467	-0.022	TRUE	-0.401	0.01	TRUE	-0.312	0.013	TRUE	-0.208	0.034	TRUE
55289	ACOXL	-0.418	-0.106	FALSE	-0.357	-0.136	FALSE	-0.303	-0.181	FALSE	-0.239	-0.162	FALSE	-0.147	-0.127	FALSE
52	ACP1	-0.329	0.032	FALSE	-0.24	0.011	FALSE	-0.195	0.068	FALSE	-0.135	0.115	FALSE	-0.034	-0.061	FALSE
53	ACP2	-0.388	-0.157	FALSE	-0.341	-0.119	FALSE	-0.251	-0.157	FALSE	-0.209	-0.207	FALSE	-0.134	-0.268	FALSE
54	ACP5	-0.529	-0.045	FALSE	-0.456	-0.017	FALSE	-0.348	0.005	FALSE	-0.261	-0.057	FALSE	-0.174	-0.081	FALSE
51205	ACP6	-0.423	0.18	FALSE	-0.336	0.162	FALSE	-0.25	0.198	FALSE	-0.213	0.288	FALSE	-0.097	0.081	FALSE
390928	ACP7	-0.763	0.207	TRUE	-0.568	0.12	TRUE	-0.436	0.098	TRUE	-0.349	0.05	TRUE	-0.215	-0.034	TRUE
55	ACPP	-0.697	0.324	TRUE	-0.483	0.299	TRUE	-0.368	0.3	TRUE	-0.274	0.309	TRUE	-0.123	0.21	TRUE
49	ACR	-0.72	0.31	TRUE	-0.6	0.13	TRUE	-0.537	0.139	TRUE	-0.47	0.197	TRUE	-0.32	0.35	TRUE
84519	ACRBP	-0.269	0.028	FALSE	-0.235	0.049	FALSE	-0.173	0.052	FALSE	-0.08	0.005	FALSE	-0.026	0.15	FALSE
56	ACRV1	-0.587	-0.005	TRUE	-0.508	0.045	TRUE	-0.434	0.056	TRUE	-0.319	-0.124	TRUE	-0.136	-0.259	TRUE
23205	ACSBG1	-0.13	-0.134	FALSE	-0.072	-0.098	FALSE	-0.039	-0.152	FALSE	-0.025	-0.171	FALSE	-0.023	-0.094	FALSE
81616	ACSBG2	-0.227	-0.156	FALSE	-0.141	-0.201	FALSE	-0.103	-0.247	FALSE	-0.049	-0.288	FALSE	-0.028	-0.516	FALSE
80221	ACSF2	-0.407	-0.316	FALSE	-0.34	-0.334	FALSE	-0.313	-0.302	FALSE	-0.229	-0.399	FALSE	-0.127	-0.383	FALSE
197322	ACSF3	-0.095	0.223	FALSE	-0.048	0.291	FALSE	-0.031	0.378	FALSE	-0.027	0.541	FALSE	-0.024	0.985	FALSE
2180	ACSL1	-0.255	-0.133	FALSE	-0.228	-0.038	FALSE	-0.193	0.007	FALSE	-0.118	0.016	FALSE	-0.029	-0.075	FALSE
2181	ACSL3	-0.627	-0.014	TRUE	-0.506	0.014	TRUE	-0.453	0.054	TRUE	-0.329	0.054	TRUE	-0.195	-0.02	TRUE
2182	ACSL4	-0.714	0.209	TRUE	-0.52	0.183	TRUE	-0.408	0.176	TRUE	-0.315	0.143	TRUE	-0.223	0.204	TRUE
51703	ACSL5	-0.281	0.254	FALSE	-0.23	0.313	FALSE	-0.153	0.381	FALSE	-0.087	0.447	FALSE	-0.022	0.687	FALSE
23305	ACSL6	-0.436	0.179	FALSE	-0.347	0.134	FALSE	-0.267	0.148	FALSE	-0.174	0.185	FALSE	-0.088	0.337	FALSE
116285	ACSM1	-0.322	0.117	FALSE	-0.241	0.161	FALSE	-0.157	0.204	FALSE	-0.059	0.23	FALSE	-0.021	0.46	FALSE
348158	ACSM2B	-0.258	0.082	FALSE	-0.184	0.088	FALSE	-0.139	0.124	FALSE	-0.09	0.126	FALSE	-0.018	0.169	FALSE
6296	ACSM3	-0.346	0.023	FALSE	-0.284	0.081	FALSE	-0.218	0.052	FALSE	-0.137	0.007	FALSE	-0.044	-0.08	FALSE
54988	ACSM5	-0.372	0.027	FALSE	-0.262	0.004	FALSE	-0.17	-0.026	FALSE	-0.085	-0.113	FALSE	-0.023	-0.658	FALSE
142827	ACSM6	-0.52	0.165	FALSE	-0.334	0.119	FALSE	-0.221	0.099	FALSE	-0.09	0.021	FALSE	-0.028	-0.305	FALSE
84532	ACSS1	-0.739	-0.015	TRUE	-0.693	0.018	TRUE	-0.635	-0.001	TRUE	-0.551	0.093	TRUE	-0.422	0.609	TRUE
55902	ACSS2	-0.201	-0.002	FALSE	-0.118	0.085	FALSE	-0.071	0.085	FALSE	-0.028	0.154	FALSE	-0.014	0.496	FALSE
79611	ACSS3	-0.296	-0.056	FALSE	-0.22	-0.134	FALSE	-0.179	-0.258	FALSE	-0.12	-0.344	FALSE	-0.026	-0.879	FALSE
58	ACTA1	-0.319	0.032	FALSE	-0.236	0.019	FALSE	-0.182	-0.104	FALSE	-0.13	-0.091	FALSE	-0.057	-0.159	FALSE
59	ACTA2	-0.418	-0.206	FALSE	-0.325	-0.226	FALSE	-0.275	-0.232	FALSE	-0.227	-0.22	FALSE	-0.13	-0.331	FALSE
60	ACTB	-1.101	0.073	TRUE	-0.977	0.061	TRUE	-0.9	0.117	TRUE	-0.755	0.073	TRUE	-0.582	0.048	TRUE
345651	ACTBL2	-0.669	-0.123	TRUE	-0.613	-0.077	TRUE	-0.528	-0.128	TRUE	-0.46	-0.015	TRUE	-0.293	0.282	TRUE
70	ACTC1	-0.514	-0.145	FALSE	-0.451	-0.124	FALSE	-0.406	-0.145	FALSE	-0.352	-0.101	FALSE	-0.267	-0.108	FALSE
71	ACTG1	-1.016	-0.007	TRUE	-0.903	-0.004	TRUE	-0.818	0.005	TRUE	-0.744	0.033	TRUE	-0.608	0.032	TRUE
72	ACTG2	-1.261	-0.011	TRUE	-1.143	0.019	TRUE	-1.057	0.019	TRUE	-0.94	-0.024	TRUE	-0.758	-0.042	TRUE
86	ACTL6A	-1.446	0.016	TRUE	-1.305	0.039	TRUE	-1.255	0.084	TRUE	-1.136	0.069	TRUE	-0.935	0.017	TRUE
51412	ACTL6B	-0.464	0.04	FALSE	-0.39	0.033	FALSE	-0.273	-0.08	FALSE	-0.212	-0.106	FALSE	-0.116	-0.284	FALSE
10881	ACTL7A	-0.764	0.028	TRUE	-0.587	0.064	TRUE	-0.53	0.123	TRUE	-0.426	0.07	TRUE	-0.307	0.233	TRUE
10880	ACTL7B	-0.286	0.095	FALSE	-0.194	0.048	FALSE	-0.142	0.038	FALSE	-0.074	0.004	FALSE	-0.026	0.035	FALSE
81569	ACTL8	-0.245	0.143	FALSE	-0.17	0.192	FALSE	-0.091	0.214	FALSE	-0.04	0.304	FALSE	-0.024	0.684	FALSE
284382	ACTL9	-0.34	0.004	FALSE	-0.262	0.019	FALSE	-0.187	-0.006	FALSE	-0.117	-0.088	FALSE	-0.033	-0.785	FALSE
87	ACTN1	-0.521	0.018	FALSE	-0.449	-0.021	FALSE	-0.4	-0.084	FALSE	-0.31	-0.123	FALSE	-0.214	-0.031	FALSE
88	ACTN2	-0.346	0.059	FALSE	-0.255	0.085	FALSE	-0.182	0.123	FALSE	-0.121	0.163	FALSE	-0.039	0.098	FALSE
81	ACTN4	-0.322	0.499	FALSE	-0.192	0.376	FALSE	-0.154	0.444	FALSE	-0.083	0.571	FALSE	0.011	0.792	FALSE
55860	ACTR10	-0.992	-0.159	TRUE	-0.866	-0.146	TRUE	-0.739	-0.164	TRUE	-0.667	-0.106	TRUE	-0.517	-0.024	TRUE
10121	ACTR1A	-1.249	-0.015	TRUE	-1.16	-0.029	TRUE	-0.988	-0.077	TRUE	-0.883	-0.058	TRUE	-0.726	-0.049	TRUE
10120	ACTR1B	-0.25	0.229	FALSE	-0.224	0.333	FALSE	-0.193	0.414	FALSE	-0.155	0.596	FALSE	-0.071	1.101	FALSE
10097	ACTR2	-0.864	-0.043	TRUE	-0.713	-0.021	TRUE	-0.624	-0.031	TRUE	-0.528	-0.028	TRUE	-0.417	-0.012	TRUE
10096	ACTR3	-0.797	0.061	TRUE	-0.675	0.1	TRUE	-0.582	0.092	TRUE	-0.488	0.059	TRUE	-0.34	0.164	TRUE
57180	ACTR3B	-0.301	0.002	FALSE	-0.253	0.037	FALSE	-0.199	0.08	FALSE	-0.14	0.111	FALSE	-0.032	-0.024	FALSE
79913	ACTR5	-0.559	0.098	TRUE	-0.487	0.119	TRUE	-0.41	0.069	TRUE	-0.349	0.099	TRUE	-0.218	0.111	TRUE
64431	ACTR6	-0.788	-0.071	TRUE	-0.709	-0.033	TRUE	-0.636	0.025	TRUE	-0.542	0.037	TRUE	-0.41	0.034	TRUE
93973	ACTR8	-0.866	-0.125	TRUE	-0.799	-0.098	TRUE	-0.737	-0.116	TRUE	-0.654	-0.134	TRUE	-0.517	-0.141	TRUE
139741	ACTRT1	-0.381	0.113	FALSE	-0.187	0.037	FALSE	-0.139	0.001	FALSE	-0.071	-0.091	FALSE	-0.024	-0.39	FALSE
140625	ACTRT2	-0.361	-0.003	FALSE	-0.32	0.043	FALSE	-0.254	-0.002	FALSE	-0.178	0.03	FALSE	-0.078	-0.118	FALSE
84517	ACTRT3	-0.272	0.127	FALSE	-0.17	0.154	FALSE	-0.092	0.165	FALSE	-0.042	0.239	FALSE	0.05	0.361	FALSE
90	ACVR1	-0.424	-0.171	FALSE	-0.353	-0.178	FALSE	-0.312	-0.144	FALSE	-0.232	-0.164	FALSE	-0.154	-0.188	FALSE
91	ACVR1B	-0.408	0.06	FALSE	-0.343	0.076	FALSE	-0.28	0.046	FALSE	-0.214	0.087	FALSE	-0.114	0.123	FALSE
130399	ACVR1C	-0.345	0	FALSE	-0.259	-0.079	FALSE	-0.199	-0.112	FALSE	-0.149	-0.071	FALSE	-0.063	-0.057	FALSE
92	ACVR2A	-0.484	0.1	FALSE	-0.405	0.098	FALSE	-0.357	0.158	FALSE	-0.308	0.254	FALSE	-0.203	0.253	FALSE
93	ACVR2B	-0.483	-0.015	FALSE	-0.373	-0.074	FALSE	-0.326	-0.072	FALSE	-0.278	-0.033	FALSE	-0.176	-0.002	FALSE
94	ACVRL1	-0.446	-0.047	FALSE	-0.38	-0.127	FALSE	-0.335	-0.096	FALSE	-0.288	-0.058	FALSE	-0.192	-0.055	FALSE
95	ACY1	-0.651	0.149	TRUE	-0.568	0.14	TRUE	-0.499	0.215	TRUE	-0.367	0.239	TRUE	-0.219	0.191	TRUE
91703	ACY3	-0.286	0.368	FALSE	-0.177	0.345	FALSE	-0.13	0.457	FALSE	-0.047	0.588	FALSE	-0.022	0.927	FALSE
97	ACYP1	-0.394	-0.071	FALSE	-0.297	-0.061	FALSE	-0.232	-0.051	FALSE	-0.144	-0.1	FALSE	-0.058	-0.228	FALSE
98	ACYP2	-0.429	-0.038	FALSE	-0.347	-0.044	FALSE	-0.286	-0.046	FALSE	-0.23	-0.101	FALSE	-0.142	-0.013	FALSE
100	ADA	-0.423	0.093	FALSE	-0.359	0.135	FALSE	-0.282	0.174	FALSE	-0.226	0.26	FALSE	-0.092	0.131	FALSE
51816	ADA2	-0.407	0.006	FALSE	-0.323	0.033	FALSE	-0.246	-0.005	FALSE	-0.178	0.053	FALSE	-0.067	0.004	FALSE
132612	ADAD1	-0.532	-0.062	FALSE	-0.462	-0.085	FALSE	-0.386	-0.132	FALSE	-0.313	-0.231	FALSE	-0.166	-0.181	FALSE
161931	ADAD2	-0.38	0.167	FALSE	-0.313	0.143	FALSE	-0.278	0.195	FALSE	-0.186	0.13	FALSE	-0.086	0.04	FALSE
161823	ADAL	-0.21	-0.052	FALSE	-0.139	-0.076	FALSE	-0.094	-0.085	FALSE	-0.044	-0.053	FALSE	-0.021	0.127	FALSE
102	ADAM10	-0.538	0.1	FALSE	-0.469	0.057	FALSE	-0.382	-0.158	FALSE	-0.26	-0.324	FALSE	-0.078	-0.621	FALSE
4185	ADAM11	-0.307	0.076	FALSE	-0.224	0.115	FALSE	-0.177	0.155	FALSE	-0.11	0.155	FALSE	-0.056	0.293	FALSE
8038	ADAM12	-0.352	0.014	FALSE	-0.297	0.055	FALSE	-0.223	0.053	FALSE	-0.157	0.054	FALSE	-0.079	0.119	FALSE
8751	ADAM15	-0.376	-0.011	FALSE	-0.265	-0.002	FALSE	-0.216	0.037	FALSE	-0.143	0.026	FALSE	-0.044	-0.131	FALSE
6868	ADAM17	-0.447	0	FALSE	-0.391	0.001	FALSE	-0.309	-0.002	FALSE	-0.255	0.032	FALSE	-0.158	0.098	FALSE
8749	ADAM18	-0.281	-0.046	FALSE	-0.238	0.039	FALSE	-0.185	-0.02	FALSE	-0.141	0.078	FALSE	-0.035	-0.082	FALSE
8728	ADAM19	-0.563	0.165	TRUE	-0.364	0.153	TRUE	-0.31	0.115	TRUE	-0.226	0.169	TRUE	-0.119	0.095	TRUE
2515	ADAM2	-0.577	0.071	TRUE	-0.51	0.091	TRUE	-0.433	0.029	TRUE	-0.351	-0.007	TRUE	-0.233	0.086	TRUE
8748	ADAM20	-0.372	0.049	FALSE	-0.299	0.101	FALSE	-0.25	0.137	FALSE	-0.144	0.149	FALSE	-0.038	0.038	FALSE
8747	ADAM21	-0.365	-0.2	FALSE	-0.295	-0.159	FALSE	-0.244	-0.218	FALSE	-0.189	-0.231	FALSE	-0.127	-0.303	FALSE
53616	ADAM22	-0.217	-0.038	FALSE	-0.158	-0.06	FALSE	-0.116	-0.064	FALSE	-0.07	-0.073	FALSE	-0.025	-0.062	FALSE
8745	ADAM23	-0.599	0.041	TRUE	-0.479	-0.007	TRUE	-0.358	-0.022	TRUE	-0.29	-0.023	TRUE	-0.199	0.003	TRUE
10863	ADAM28	-0.355	-0.102	FALSE	-0.203	-0.205	FALSE	-0.16	-0.169	FALSE	-0.126	-0.133	FALSE	-0.053	-0.234	FALSE
11086	ADAM29	-0.332	0.044	FALSE	-0.3	0.106	FALSE	-0.191	0.088	FALSE	-0.13	0.119	FALSE	-0.035	0.075	FALSE
11085	ADAM30	-0.48	-0.107	FALSE	-0.392	-0.08	FALSE	-0.326	-0.062	FALSE	-0.265	-0.078	FALSE	-0.187	-0.033	FALSE
203102	ADAM32	-0.369	-0.127	FALSE	-0.285	-0.134	FALSE	-0.216	-0.115	FALSE	-0.177	-0.07	FALSE	-0.094	-0.25	FALSE
80332	ADAM33	-0.151	-0.08	FALSE	-0.124	-0.021	FALSE	-0.098	-0.051	FALSE	-0.05	-0.037	FALSE	-0.024	0.21	FALSE
8756	ADAM7	-0.368	0.066	FALSE	-0.29	0.023	FALSE	-0.253	0.028	FALSE	-0.202	0.071	FALSE	-0.094	-0.087	FALSE
101	ADAM8	-0.39	0.034	FALSE	-0.36	0.127	FALSE	-0.318	0.121	FALSE	-0.248	0.101	FALSE	-0.127	0.045	FALSE
8754	ADAM9	-0.177	0.095	FALSE	-0.128	0.094	FALSE	-0.093	0.149	FALSE	-0.04	0.239	FALSE	-0.023	0.492	FALSE
27299	ADAMDEC1	-0.78	-0.036	TRUE	-0.682	0.018	TRUE	-0.586	0.006	TRUE	-0.513	0.057	TRUE	-0.367	0.483	TRUE
9510	ADAMTS1	-0.497	-0.105	FALSE	-0.394	-0.148	FALSE	-0.351	-0.14	FALSE	-0.287	-0.142	FALSE	-0.187	-0.097	FALSE
81794	ADAMTS10	-0.521	0.013	FALSE	-0.408	-0.004	FALSE	-0.365	0.005	FALSE	-0.287	0.005	FALSE	-0.191	-0.042	FALSE
81792	ADAMTS12	-0.666	-0.061	TRUE	-0.482	-0.123	TRUE	-0.392	-0.162	TRUE	-0.32	-0.21	TRUE	-0.233	0.086	TRUE
11093	ADAMTS13	-0.446	-0.105	FALSE	-0.372	-0.084	FALSE	-0.299	-0.077	FALSE	-0.204	-0.131	FALSE	-0.106	-0.335	FALSE
140766	ADAMTS14	-0.299	0.162	FALSE	-0.175	0.152	FALSE	-0.125	0.247	FALSE	-0.043	0.351	FALSE	-0.021	0.679	FALSE
170689	ADAMTS15	-0.464	-0.008	FALSE	-0.395	0.084	FALSE	-0.305	-0.029	FALSE	-0.239	0.002	FALSE	-0.15	-0.107	FALSE
170690	ADAMTS16	-0.34	-0.055	FALSE	-0.284	-0.059	FALSE	-0.245	-0.084	FALSE	-0.189	-0.147	FALSE	-0.108	-0.245	FALSE
170691	ADAMTS17	-0.241	0.35	FALSE	-0.151	0.479	FALSE	-0.059	0.571	FALSE	-0.023	0.726	FALSE	-0.017	1.428	FALSE
170692	ADAMTS18	-0.37	-0.14	FALSE	-0.316	-0.161	FALSE	-0.262	-0.189	FALSE	-0.179	-0.269	FALSE	-0.115	-0.313	FALSE
171019	ADAMTS19	-0.49	0.046	FALSE	-0.397	0.055	FALSE	-0.366	0.122	FALSE	-0.288	0.114	FALSE	-0.158	-0.104	FALSE
9509	ADAMTS2	-0.313	0.149	FALSE	-0.239	0.113	FALSE	-0.167	0.141	FALSE	-0.105	0.176	FALSE	-0.033	0.294	FALSE
80070	ADAMTS20	-0.66	0.217	TRUE	-0.52	0.24	TRUE	-0.43	0.276	TRUE	-0.324	0.223	TRUE	-0.201	0.237	TRUE
9508	ADAMTS3	-0.394	0.044	FALSE	-0.315	0.003	FALSE	-0.262	0.001	FALSE	-0.192	0.027	FALSE	-0.081	-0.039	FALSE
9507	ADAMTS4	-0.467	0.336	FALSE	-0.268	0.341	FALSE	-0.204	0.46	FALSE	-0.131	0.5	FALSE	-0.028	0.816	FALSE
11096	ADAMTS5	-0.126	0.147	FALSE	-0.088	0.125	FALSE	-0.046	0.05	FALSE	-0.023	0.128	FALSE	-0.018	0.506	FALSE
11174	ADAMTS6	-0.327	-0.101	FALSE	-0.273	-0.024	FALSE	-0.208	-0.037	FALSE	-0.165	0.023	FALSE	-0.049	-0.063	FALSE
11173	ADAMTS7	-0.233	-0.014	FALSE	-0.174	0.016	FALSE	-0.135	-0.003	FALSE	-0.087	0.057	FALSE	-0.043	0.174	FALSE
11095	ADAMTS8	-0.375	-0.032	FALSE	-0.33	-0.043	FALSE	-0.213	-0.08	FALSE	-0.127	-0.088	FALSE	-0.044	-0.123	FALSE
56999	ADAMTS9	-0.325	0.068	FALSE	-0.242	0.112	FALSE	-0.189	0.105	FALSE	-0.132	0.117	FALSE	-0.034	0.01	FALSE
92949	ADAMTSL1	-0.26	-0.12	FALSE	-0.172	-0.13	FALSE	-0.138	-0.099	FALSE	-0.076	-0.115	FALSE	-0.027	-0.394	FALSE
9719	ADAMTSL2	-0.18	-0.032	FALSE	-0.094	-0.069	FALSE	-0.046	-0.065	FALSE	-0.029	-0.075	FALSE	-0.024	-0.076	FALSE
57188	ADAMTSL3	-0.375	-0.055	FALSE	-0.271	-0.075	FALSE	-0.212	-0.088	FALSE	-0.148	-0.084	FALSE	-0.048	-0.149	FALSE
54507	ADAMTSL4	-0.272	0.175	FALSE	-0.195	0.158	FALSE	-0.141	0.2	FALSE	-0.068	0.187	FALSE	-0.026	0.381	FALSE
339366	ADAMTSL5	-0.364	-0.065	FALSE	-0.282	-0.081	FALSE	-0.239	-0.103	FALSE	-0.188	-0.128	FALSE	-0.097	-0.18	FALSE
11033	ADAP1	-0.586	-0.064	TRUE	-0.544	-0.053	TRUE	-0.468	-0.017	TRUE	-0.364	-0.074	TRUE	-0.249	0.101	TRUE
55803	ADAP2	-0.4	-0.044	FALSE	-0.305	-0.045	FALSE	-0.207	-0.104	FALSE	-0.153	-0.11	FALSE	-0.081	-0.179	FALSE
103	ADAR	-1.236	0.154	TRUE	-1.08	0.15	TRUE	-0.828	0.117	TRUE	-0.628	0.116	TRUE	-0.419	0.18	TRUE
104	ADARB1	-0.407	-0.16	FALSE	-0.342	-0.16	FALSE	-0.308	-0.129	FALSE	-0.253	-0.113	FALSE	-0.147	-0.124	FALSE
105	ADARB2	-0.317	-0.03	FALSE	-0.254	-0.045	FALSE	-0.185	-0.12	FALSE	-0.11	-0.077	FALSE	-0.024	-0.132	FALSE
23536	ADAT1	-0.168	0.168	FALSE	-0.119	0.194	FALSE	-0.046	0.246	FALSE	0.014	0.315	FALSE	0.106	0.405	FALSE
134637	ADAT2	-0.482	0.329	FALSE	-0.385	0.186	FALSE	-0.358	0.241	FALSE	-0.288	0.275	FALSE	-0.186	0.423	FALSE
113179	ADAT3	-0.388	0.11	FALSE	-0.342	0.073	FALSE	-0.297	0.094	FALSE	-0.248	0.16	FALSE	-0.144	0.194	FALSE
57143	ADCK1	-0.508	0.144	FALSE	-0.403	0.091	FALSE	-0.356	0.176	FALSE	-0.246	0.24	FALSE	-0.123	0.242	FALSE
90956	ADCK2	-0.371	0.179	FALSE	-0.312	0.207	FALSE	-0.284	0.208	FALSE	-0.212	0.227	FALSE	-0.083	0.31	FALSE
203054	ADCK5	-0.345	0.138	FALSE	-0.267	0.071	FALSE	-0.221	0.072	FALSE	-0.158	0.069	FALSE	-0.071	0.075	FALSE
107	ADCY1	-0.447	-0.047	FALSE	-0.398	-0.047	FALSE	-0.346	-0.067	FALSE	-0.292	-0.074	FALSE	-0.202	-0.083	FALSE
55811	ADCY10	-0.528	0.106	FALSE	-0.445	0.042	FALSE	-0.344	0.048	FALSE	-0.273	0.057	FALSE	-0.16	0.095	FALSE
108	ADCY2	-0.475	-0.219	FALSE	-0.412	-0.189	FALSE	-0.377	-0.184	FALSE	-0.301	-0.189	FALSE	-0.225	-0.262	FALSE
109	ADCY3	-0.366	-0.023	FALSE	-0.3	-0.021	FALSE	-0.238	-0.007	FALSE	-0.18	0.022	FALSE	-0.09	0.055	FALSE
196883	ADCY4	-0.445	-0.024	FALSE	-0.385	-0.088	FALSE	-0.337	-0.115	FALSE	-0.277	-0.119	FALSE	-0.191	-0.084	FALSE
111	ADCY5	-0.353	0.021	FALSE	-0.281	0.003	FALSE	-0.242	0.031	FALSE	-0.168	0.008	FALSE	-0.076	0.009	FALSE
112	ADCY6	-0.603	0.171	TRUE	-0.511	0.265	TRUE	-0.419	0.283	TRUE	-0.334	0.302	TRUE	-0.184	0.339	TRUE
113	ADCY7	-0.334	-0.078	FALSE	-0.284	-0.075	FALSE	-0.233	-0.019	FALSE	-0.193	0.044	FALSE	-0.113	0.112	FALSE
114	ADCY8	-0.374	0.013	FALSE	-0.237	-0.034	FALSE	-0.176	-0.052	FALSE	-0.145	0.057	FALSE	-0.058	0.09	FALSE
115	ADCY9	-0.453	0.003	FALSE	-0.389	-0.097	FALSE	-0.312	-0.122	FALSE	-0.257	-0.107	FALSE	-0.174	-0.1	FALSE
116	ADCYAP1	-0.391	-0.12	FALSE	-0.351	-0.062	FALSE	-0.291	-0.045	FALSE	-0.241	-0.025	FALSE	-0.141	-0.105	FALSE
117	ADCYAP1R1	-0.607	-0.232	TRUE	-0.563	-0.185	TRUE	-0.512	-0.156	TRUE	-0.435	-0.058	TRUE	-0.317	0.31	TRUE
118	ADD1	-0.333	0.156	FALSE	-0.273	0.157	FALSE	-0.224	0.125	FALSE	-0.169	0.171	FALSE	-0.064	0.005	FALSE
119	ADD2	-0.423	0.074	FALSE	-0.258	-0.062	FALSE	-0.182	-0.112	FALSE	-0.115	-0.182	FALSE	-0.034	-0.787	FALSE
120	ADD3	-0.389	-0.06	FALSE	-0.322	-0.158	FALSE	-0.288	-0.154	FALSE	-0.226	-0.254	FALSE	-0.106	-0.463	FALSE
84435	ADGRA1	-0.488	-0.07	FALSE	-0.344	-0.115	FALSE	-0.263	-0.16	FALSE	-0.199	-0.174	FALSE	-0.116	-0.352	FALSE
25960	ADGRA2	-0.563	-0.162	TRUE	-0.464	-0.184	TRUE	-0.396	-0.193	TRUE	-0.326	-0.216	TRUE	-0.23	0.038	TRUE
166647	ADGRA3	-0.229	0.049	FALSE	-0.145	0.095	FALSE	-0.105	0.051	FALSE	-0.051	-0.024	FALSE	-0.029	0.044	FALSE
575	ADGRB1	-0.427	0.07	FALSE	-0.37	0.081	FALSE	-0.284	0.085	FALSE	-0.179	0.017	FALSE	-0.069	-0.045	FALSE
576	ADGRB2	-0.647	-0.112	TRUE	-0.557	-0.097	TRUE	-0.513	-0.091	TRUE	-0.422	-0.07	TRUE	-0.303	0.284	TRUE
577	ADGRB3	-0.344	0.088	FALSE	-0.254	0.154	FALSE	-0.179	0.172	FALSE	-0.113	0.169	FALSE	-0.038	0.292	FALSE
283383	ADGRD1	-0.727	0.043	TRUE	-0.624	-0.004	TRUE	-0.537	-0.03	TRUE	-0.452	-0.03	TRUE	-0.326	0.342	TRUE
2015	ADGRE1	-0.373	-0.111	FALSE	-0.295	-0.114	FALSE	-0.222	-0.172	FALSE	-0.182	-0.103	FALSE	-0.102	-0.182	FALSE
30817	ADGRE2	-0.344	0.15	FALSE	-0.244	0.15	FALSE	-0.187	0.165	FALSE	-0.116	0.25	FALSE	0.012	0.376	FALSE
84658	ADGRE3	-0.498	0.071	FALSE	-0.426	-0.011	FALSE	-0.361	-0.047	FALSE	-0.288	-0.095	FALSE	-0.179	-0.113	FALSE
976	ADGRE5	-0.32	-0.119	FALSE	-0.249	-0.092	FALSE	-0.188	-0.066	FALSE	-0.124	-0.076	FALSE	-0.052	-0.008	FALSE
266977	ADGRF1	-0.357	-0.153	FALSE	-0.327	-0.119	FALSE	-0.266	-0.181	FALSE	-0.223	-0.157	FALSE	-0.15	-0.143	FALSE
165082	ADGRF3	-0.43	-0.017	FALSE	-0.349	-0.067	FALSE	-0.304	-0.082	FALSE	-0.239	-0.117	FALSE	-0.137	-0.238	FALSE
221393	ADGRF4	-0.712	-0.105	TRUE	-0.576	-0.1	TRUE	-0.506	-0.123	TRUE	-0.39	-0.116	TRUE	-0.272	0.198	TRUE
221395	ADGRF5	-0.388	-0.057	FALSE	-0.292	-0.078	FALSE	-0.225	-0.105	FALSE	-0.16	-0.115	FALSE	-0.071	-0.135	FALSE
9289	ADGRG1	-0.247	0.245	FALSE	-0.216	0.322	FALSE	-0.149	0.294	FALSE	-0.078	0.344	FALSE	-0.025	0.448	FALSE
10149	ADGRG2	-0.291	-0.097	FALSE	-0.242	-0.074	FALSE	-0.216	-0.076	FALSE	-0.166	-0.066	FALSE	-0.097	-0.048	FALSE
222487	ADGRG3	-0.435	-0.065	FALSE	-0.336	-0.11	FALSE	-0.272	-0.169	FALSE	-0.221	-0.148	FALSE	-0.13	-0.275	FALSE
139378	ADGRG4	-1.161	-0.037	TRUE	-1.016	0.049	TRUE	-0.885	0.131	TRUE	-0.767	0.286	TRUE	-0.637	0.183	TRUE
221188	ADGRG5	-0.383	-0.153	FALSE	-0.299	-0.139	FALSE	-0.221	-0.123	FALSE	-0.155	-0.101	FALSE	-0.05	-0.322	FALSE
57211	ADGRG6	-0.371	0.355	FALSE	-0.277	0.44	FALSE	-0.18	0.452	FALSE	-0.067	0.443	FALSE	-0.019	0.877	FALSE
84873	ADGRG7	-0.521	-0.061	FALSE	-0.44	-0.062	FALSE	-0.363	-0.049	FALSE	-0.276	-0.117	FALSE	-0.167	-0.175	FALSE
22859	ADGRL1	-0.379	-0.086	FALSE	-0.277	-0.097	FALSE	-0.248	-0.006	FALSE	-0.171	0.044	FALSE	-0.059	-0.109	FALSE
23266	ADGRL2	-0.363	-0.053	FALSE	-0.294	-0.04	FALSE	-0.225	-0.056	FALSE	-0.172	-0.085	FALSE	-0.082	-0.275	FALSE
23284	ADGRL3	-0.403	-0.002	FALSE	-0.344	0.048	FALSE	-0.277	0.012	FALSE	-0.225	0.069	FALSE	-0.098	0.016	FALSE
64123	ADGRL4	-0.557	-0.125	TRUE	-0.487	-0.132	TRUE	-0.439	-0.146	TRUE	-0.354	-0.148	TRUE	-0.267	0.205	TRUE
84059	ADGRV1	-0.243	-0.041	FALSE	-0.151	-0.072	FALSE	-0.115	-0.081	FALSE	-0.062	-0.103	FALSE	-0.004	0.007	FALSE
124	ADH1A	-0.347	0.022	FALSE	-0.262	0.062	FALSE	-0.166	0.078	FALSE	-0.112	0.119	FALSE	-0.035	0.266	FALSE
125	ADH1B	-0.573	-0.015	TRUE	-0.494	-0.04	TRUE	-0.389	-0.076	TRUE	-0.309	-0.063	TRUE	-0.215	-0.003	TRUE
127	ADH4	-0.893	0.139	TRUE	-0.735	0.164	TRUE	-0.662	0.208	TRUE	-0.528	0.247	TRUE	-0.382	0.397	TRUE
128	ADH5	-0.588	0.018	TRUE	-0.456	-0.055	TRUE	-0.413	-0.006	TRUE	-0.326	0.005	TRUE	-0.215	0.046	TRUE
130	ADH6	-0.408	-0.15	FALSE	-0.27	-0.2	FALSE	-0.235	-0.199	FALSE	-0.192	-0.138	FALSE	-0.112	-0.147	FALSE
137872	ADHFE1	-0.326	-0.057	FALSE	-0.29	-0.003	FALSE	-0.244	0.034	FALSE	-0.177	0.071	FALSE	-0.073	-0.053	FALSE
55256	ADI1	-0.402	0.04	FALSE	-0.345	0.076	FALSE	-0.308	0.091	FALSE	-0.221	0.086	FALSE	-0.124	-0.114	FALSE
149685	ADIG	-0.264	-0.181	FALSE	-0.172	-0.182	FALSE	-0.128	-0.184	FALSE	-0.077	-0.245	FALSE	-0.025	-0.687	FALSE
9370	ADIPOQ	-0.429	-0.021	FALSE	-0.331	0.009	FALSE	-0.278	0.042	FALSE	-0.217	-0.042	FALSE	-0.09	-0.232	FALSE
51094	ADIPOR1	-0.309	-0.123	FALSE	-0.265	-0.035	FALSE	-0.202	-0.075	FALSE	-0.15	-0.057	FALSE	-0.091	0.004	FALSE
79602	ADIPOR2	-0.299	0.045	FALSE	-0.278	0.108	FALSE	-0.24	0.098	FALSE	-0.136	0.051	FALSE	-0.056	0.086	FALSE
10974	ADIRF	-0.379	-0.017	FALSE	-0.296	-0.017	FALSE	-0.234	-0.037	FALSE	-0.181	-0.014	FALSE	-0.092	-0.152	FALSE
132	ADK	-0.316	-0.047	FALSE	-0.221	-0.115	FALSE	-0.177	-0.089	FALSE	-0.149	-0.082	FALSE	-0.075	0.019	FALSE
133	ADM	-0.54	0.097	FALSE	-0.494	0.145	FALSE	-0.399	0.102	FALSE	-0.331	0.195	FALSE	-0.217	0.196	FALSE
79924	ADM2	-0.321	0.052	FALSE	-0.268	0.076	FALSE	-0.214	0.132	FALSE	-0.154	0.206	FALSE	-0.055	0.084	FALSE
23394	ADNP	-0.478	-0.008	FALSE	-0.42	-0.03	FALSE	-0.365	0.024	FALSE	-0.293	0.022	FALSE	-0.194	0.078	FALSE
22850	ADNP2	-0.446	-0.043	FALSE	-0.337	-0.044	FALSE	-0.253	-0.053	FALSE	-0.189	-0.087	FALSE	-0.095	-0.287	FALSE
134	ADORA1	-0.365	0.113	FALSE	-0.314	0.018	FALSE	-0.236	0.044	FALSE	-0.164	0.022	FALSE	-0.072	0.016	FALSE
135	ADORA2A	-0.554	0.106	TRUE	-0.457	0.089	TRUE	-0.379	0.085	TRUE	-0.264	0.107	TRUE	-0.159	0.021	TRUE
136	ADORA2B	-0.244	-0.169	FALSE	-0.19	-0.141	FALSE	-0.151	-0.189	FALSE	-0.112	-0.184	FALSE	-0.059	-0.109	FALSE
83440	ADPGK	-0.509	0.077	FALSE	-0.433	0.067	FALSE	-0.373	0.068	FALSE	-0.294	0.048	FALSE	-0.195	0.1	FALSE
141	ADPRH	-0.217	0.014	FALSE	-0.166	0.011	FALSE	-0.13	0.017	FALSE	-0.095	0.021	FALSE	-0.04	0.024	FALSE
113622	ADPRHL1	-0.236	-0.108	FALSE	-0.189	-0.188	FALSE	-0.121	-0.33	FALSE	-0.086	-0.417	FALSE	-0.046	-0.837	FALSE
54936	ADPRHL2	-0.302	0.362	FALSE	-0.232	0.323	FALSE	-0.192	0.358	FALSE	-0.109	0.396	FALSE	-0.046	0.65	FALSE
56985	ADPRM	-0.459	0.113	FALSE	-0.41	0.15	FALSE	-0.345	0.112	FALSE	-0.272	0.125	FALSE	-0.162	0.201	FALSE
148	ADRA1A	-0.504	0.118	FALSE	-0.412	0.147	FALSE	-0.283	0.19	FALSE	-0.213	0.141	FALSE	-0.118	0.196	FALSE
147	ADRA1B	-0.356	0.031	FALSE	-0.261	0.005	FALSE	-0.17	-0.023	FALSE	-0.109	0.033	FALSE	-0.023	0.083	FALSE
146	ADRA1D	-0.595	0.151	TRUE	-0.511	0.108	TRUE	-0.407	0.104	TRUE	-0.298	0.093	TRUE	-0.187	0.222	TRUE
150	ADRA2A	-0.358	0.017	FALSE	-0.271	0.01	FALSE	-0.205	0.01	FALSE	-0.145	0.014	FALSE	-0.059	0.03	FALSE
151	ADRA2B	-0.428	-0.074	FALSE	-0.349	-0.016	FALSE	-0.283	-0.067	FALSE	-0.205	-0.074	FALSE	-0.129	-0.022	FALSE
152	ADRA2C	-0.497	-0.024	FALSE	-0.413	-0.002	FALSE	-0.354	-0.006	FALSE	-0.269	-0.039	FALSE	-0.163	0.038	FALSE
153	ADRB1	-0.263	-0.054	FALSE	-0.221	-0.028	FALSE	-0.176	-0.04	FALSE	-0.115	-0.029	FALSE	-0.023	-0.059	FALSE
154	ADRB2	-0.336	-0.107	FALSE	-0.23	-0.099	FALSE	-0.191	-0.05	FALSE	-0.146	0.012	FALSE	-0.055	-0.075	FALSE
155	ADRB3	-0.351	0.086	FALSE	-0.288	0.001	FALSE	-0.222	0.014	FALSE	-0.164	-0.059	FALSE	-0.073	-0.055	FALSE
11047	ADRM1	-0.527	-0.027	FALSE	-0.475	-0.051	FALSE	-0.415	0.011	FALSE	-0.336	0.05	FALSE	-0.222	0.141	FALSE
158	ADSL	-1.165	0.075	TRUE	-1.044	0.126	TRUE	-0.892	0.171	TRUE	-0.703	0.16	TRUE	-0.503	0.318	TRUE
159	ADSS	-0.503	0.107	FALSE	-0.428	0.155	FALSE	-0.331	0.152	FALSE	-0.255	0.222	FALSE	-0.156	0.396	FALSE
122622	ADSSL1	-0.41	-0.07	FALSE	-0.314	-0.131	FALSE	-0.27	-0.131	FALSE	-0.215	-0.165	FALSE	-0.129	-0.285	FALSE
84830	ADTRP	-0.551	0.328	TRUE	-0.477	0.317	TRUE	-0.337	0.311	TRUE	-0.269	0.36	TRUE	-0.143	0.505	TRUE
165	AEBP1	-0.447	0.201	FALSE	-0.391	0.19	FALSE	-0.324	0.239	FALSE	-0.263	0.328	FALSE	-0.108	0.179	FALSE
121536	AEBP2	-0.483	0.155	FALSE	-0.352	0.074	FALSE	-0.283	0.024	FALSE	-0.228	0.028	FALSE	-0.126	-0.131	FALSE
64782	AEN	-0.447	0.066	FALSE	-0.386	0.165	FALSE	-0.302	0.206	FALSE	-0.205	0.273	FALSE	-0.089	0.078	FALSE
166	TLE5	-0.461	0.111	FALSE	-0.386	0.095	FALSE	-0.293	0.083	FALSE	-0.227	0.156	FALSE	-0.12	0.04	FALSE
60312	AFAP1	-0.309	-0.023	FALSE	-0.21	-0.029	FALSE	-0.135	-0.157	FALSE	-0.079	-0.273	FALSE	-0.022	-0.672	FALSE
4301	AFDN	-0.577	0.004	TRUE	-0.474	0.004	TRUE	-0.355	-0.002	TRUE	-0.228	-0.089	TRUE	-0.13	-0.256	TRUE
4299	AFF1	-0.456	0.267	FALSE	-0.402	0.237	FALSE	-0.311	0.244	FALSE	-0.204	0.183	FALSE	-0.069	0.179	FALSE
2334	AFF2	-0.129	-0.045	FALSE	-0.04	0.004	FALSE	-0.024	0.072	FALSE	-0.022	0.128	FALSE	-0.021	0.577	FALSE
3899	AFF3	-0.378	0.074	FALSE	-0.292	-0.131	FALSE	-0.233	-0.15	FALSE	-0.17	-0.145	FALSE	-0.1	-0.121	FALSE
27125	AFF4	-0.488	0.101	FALSE	-0.363	0.119	FALSE	-0.296	0.056	FALSE	-0.237	0.112	FALSE	-0.147	0.192	FALSE
246269	AFG1L	-0.314	0.211	FALSE	-0.169	0.131	FALSE	-0.125	0.184	FALSE	-0.046	0.084	FALSE	-0.025	0.032	FALSE
10939	AFG3L2	-2.112	0.06	TRUE	-1.981	0.135	TRUE	-1.69	0.05	TRUE	-1.478	-0.032	TRUE	-1.222	-0.302	TRUE
173	AFM	-0.32	0.17	FALSE	-0.233	0.183	FALSE	-0.164	0.188	FALSE	-0.103	0.217	FALSE	-0.024	0.165	FALSE
125061	AFMID	-0.32	-0.046	FALSE	-0.261	-0.03	FALSE	-0.202	-0.029	FALSE	-0.147	0.007	FALSE	-0.04	-0.09	FALSE
174	AFP	-0.244	0.038	FALSE	-0.201	0.03	FALSE	-0.155	0.081	FALSE	-0.089	0.119	FALSE	-0.005	0.17	FALSE
54812	AFTPH	-0.169	-0.222	FALSE	-0.118	-0.258	FALSE	-0.059	-0.316	FALSE	-0.036	-0.332	FALSE	-0.024	-0.307	FALSE
175	AGA	-0.717	-0.069	TRUE	-0.627	-0.067	TRUE	-0.518	-0.084	TRUE	-0.441	-0.034	TRUE	-0.335	0.4	TRUE
116987	AGAP1	-0.324	0.026	FALSE	-0.231	0.015	FALSE	-0.152	0.045	FALSE	-0.101	0.051	FALSE	-0.031	0.052	FALSE
116986	AGAP2	-0.402	0.014	FALSE	-0.346	0.032	FALSE	-0.274	0.053	FALSE	-0.208	0.024	FALSE	-0.113	0.053	FALSE
116988	AGAP3	-0.327	-0.004	FALSE	-0.262	0.038	FALSE	-0.224	0.084	FALSE	-0.147	0.039	FALSE	-0.069	0.08	FALSE
119016	AGAP4	-0.376	0.043	FALSE	-0.288	0.022	FALSE	-0.213	0.063	FALSE	-0.162	0.146	FALSE	-0.069	0.167	FALSE
729092	AGAP5	-0.227	-0.023	FALSE	-0.189	0.02	FALSE	-0.158	0.074	FALSE	-0.101	0.117	FALSE	-0.008	0.252	FALSE
414189	AGAP6	-0.45	-0.068	FALSE	-0.335	-0.037	FALSE	-0.28	0.014	FALSE	-0.223	0.065	FALSE	-0.127	0.08	FALSE
642517	AGAP9	-0.265	0.084	FALSE	-0.228	0.124	FALSE	-0.19	0.228	FALSE	-0.12	0.288	FALSE	-0.032	0.382	FALSE
79841	AGBL2	-0.422	-0.076	FALSE	-0.366	-0.107	FALSE	-0.311	-0.089	FALSE	-0.251	-0.068	FALSE	-0.136	-0.089	FALSE
340351	AGBL3	-0.41	0.328	FALSE	-0.304	0.406	FALSE	-0.245	0.382	FALSE	-0.174	0.427	FALSE	-0.07	0.352	FALSE
60509	AGBL5	-0.332	-0.045	FALSE	-0.239	-0.053	FALSE	-0.157	-0.061	FALSE	-0.099	-0.06	FALSE	-0.039	-0.106	FALSE
177	AGER	-0.345	-0.027	FALSE	-0.265	-0.106	FALSE	-0.229	-0.12	FALSE	-0.174	-0.148	FALSE	-0.089	-0.257	FALSE
3267	AGFG1	-0.477	-0.042	FALSE	-0.372	-0.026	FALSE	-0.334	0.016	FALSE	-0.262	0.031	FALSE	-0.171	0.016	FALSE
3268	AGFG2	-0.463	-0.022	FALSE	-0.383	-0.015	FALSE	-0.289	-0.052	FALSE	-0.199	-0.094	FALSE	-0.103	-0.297	FALSE
55109	AGGF1	-0.301	-0.143	FALSE	-0.264	-0.168	FALSE	-0.175	-0.229	FALSE	-0.103	-0.292	FALSE	-0.025	-0.72	FALSE
55750	AGK	-0.506	-0.086	FALSE	-0.346	-0.104	FALSE	-0.29	-0.093	FALSE	-0.2	-0.237	FALSE	-0.055	-0.729	FALSE
178	AGL	-0.644	-0.082	TRUE	-0.553	-0.1	TRUE	-0.468	-0.198	TRUE	-0.391	-0.122	TRUE	-0.279	0.18	TRUE
79814	AGMAT	-0.413	-0.146	FALSE	-0.356	-0.098	FALSE	-0.293	-0.107	FALSE	-0.208	-0.156	FALSE	-0.116	-0.283	FALSE
392636	AGMO	-0.451	-0.157	FALSE	-0.373	-0.156	FALSE	-0.332	-0.254	FALSE	-0.253	-0.342	FALSE	-0.141	-0.292	FALSE
26523	AGO1	-0.369	0.078	FALSE	-0.331	0.118	FALSE	-0.269	0.135	FALSE	-0.211	0.244	FALSE	-0.1	0.219	FALSE
27161	AGO2	-0.615	0.175	TRUE	-0.421	0.174	TRUE	-0.337	0.165	TRUE	-0.241	0.195	TRUE	-0.102	-0.014	TRUE
192669	AGO3	-0.39	0.137	FALSE	-0.328	0.142	FALSE	-0.271	0.174	FALSE	-0.217	0.273	FALSE	-0.121	0.43	FALSE
192670	AGO4	-0.239	-0.156	FALSE	-0.194	-0.129	FALSE	-0.18	-0.078	FALSE	-0.138	-0.073	FALSE	-0.058	-0.197	FALSE
10554	AGPAT1	-0.536	0.151	FALSE	-0.378	0.123	FALSE	-0.283	0.134	FALSE	-0.177	0.129	FALSE	-0.072	0.018	FALSE
10555	AGPAT2	-0.36	-0.061	FALSE	-0.33	-0.055	FALSE	-0.293	-0.057	FALSE	-0.238	-0.07	FALSE	-0.158	-0.073	FALSE
56894	AGPAT3	-0.646	0.087	TRUE	-0.576	0.068	TRUE	-0.464	0.056	TRUE	-0.378	0.081	TRUE	-0.256	0.183	TRUE
56895	AGPAT4	-0.406	0.362	FALSE	-0.265	0.436	FALSE	-0.217	0.437	FALSE	-0.152	0.623	FALSE	-0.025	0.856	FALSE
55326	AGPAT5	-0.493	0.087	FALSE	-0.376	0.045	FALSE	-0.34	0.09	FALSE	-0.274	0.155	FALSE	-0.15	0.205	FALSE
8540	AGPS	-0.484	0.219	FALSE	-0.387	0.203	FALSE	-0.306	0.205	FALSE	-0.24	0.236	FALSE	-0.108	0.016	FALSE
10551	AGR2	-0.481	-0.192	FALSE	-0.426	-0.24	FALSE	-0.362	-0.228	FALSE	-0.294	-0.254	FALSE	-0.2	-0.068	FALSE
155465	AGR3	-0.331	-0.06	FALSE	-0.228	-0.099	FALSE	-0.157	-0.191	FALSE	-0.089	-0.261	FALSE	-0.023	-0.734	FALSE
375790	AGRN	-0.384	0.187	FALSE	-0.302	0.179	FALSE	-0.217	0.221	FALSE	-0.142	0.299	FALSE	-0.054	0.504	FALSE
181	AGRP	-0.382	-0.018	FALSE	-0.304	-0.009	FALSE	-0.238	-0.006	FALSE	-0.162	-0.039	FALSE	-0.063	-0.238	FALSE
183	AGT	-0.552	0.295	TRUE	-0.431	0.335	TRUE	-0.35	0.382	TRUE	-0.282	0.485	TRUE	-0.126	0.744	TRUE
23287	AGTPBP1	-0.245	0.229	FALSE	-0.138	0.335	FALSE	-0.078	0.225	FALSE	-0.021	0.295	FALSE	-0.013	0.796	FALSE
185	AGTR1	-0.27	-0.159	FALSE	-0.231	-0.148	FALSE	-0.198	-0.141	FALSE	-0.168	-0.094	FALSE	-0.094	-0.056	FALSE
186	AGTR2	-0.342	-0.058	FALSE	-0.288	-0.017	FALSE	-0.23	-0.013	FALSE	-0.158	-0.04	FALSE	-0.078	-0.045	FALSE
57085	AGTRAP	-0.205	0.034	FALSE	-0.172	0.094	FALSE	-0.096	0.062	FALSE	-0.039	0.083	FALSE	-0.022	0.381	FALSE
189	AGXT	-0.462	0.108	FALSE	-0.397	0.077	FALSE	-0.327	0.124	FALSE	-0.232	0.107	FALSE	-0.112	0.046	FALSE
64902	AGXT2	-0.396	-0.14	FALSE	-0.3	-0.196	FALSE	-0.248	-0.168	FALSE	-0.195	-0.185	FALSE	-0.121	-0.155	FALSE
25909	AHCTF1	-1.466	0.001	TRUE	-1.3	0.01	TRUE	-1.185	-0.005	TRUE	-1.022	-0.065	TRUE	-0.899	-0.133	TRUE
191	AHCY	-0.799	0.099	TRUE	-0.639	0.092	TRUE	-0.54	0.118	TRUE	-0.459	0.139	TRUE	-0.29	0.175	TRUE
10768	AHCYL1	-0.762	0.17	TRUE	-0.71	0.239	TRUE	-0.578	0.273	TRUE	-0.459	0.31	TRUE	-0.264	0.386	TRUE
23382	AHCYL2	-0.447	-0.023	FALSE	-0.365	-0.085	FALSE	-0.281	-0.142	FALSE	-0.236	-0.109	FALSE	-0.153	-0.085	FALSE
54806	AHI1	-0.468	0.226	FALSE	-0.393	0.276	FALSE	-0.309	0.278	FALSE	-0.211	0.309	FALSE	-0.091	0.293	FALSE
79026	AHNAK	-0.479	-0.147	FALSE	-0.378	-0.198	FALSE	-0.322	-0.221	FALSE	-0.254	-0.32	FALSE	-0.149	-0.281	FALSE
196	AHR	-0.62	-0.01	TRUE	-0.484	0.004	TRUE	-0.433	0.005	TRUE	-0.355	-0.014	TRUE	-0.249	-0.031	TRUE
57491	AHRR	-0.503	-0.155	FALSE	-0.397	-0.174	FALSE	-0.307	-0.23	FALSE	-0.263	-0.198	FALSE	-0.176	-0.227	FALSE
10598	AHSA1	-0.376	-0.033	FALSE	-0.303	0.025	FALSE	-0.254	-0.012	FALSE	-0.127	-0.096	FALSE	-0.04	-0.599	FALSE
197	AHSG	-0.318	0.192	FALSE	-0.232	0.176	FALSE	-0.148	0.251	FALSE	-0.088	0.271	FALSE	-0.023	0.5	FALSE
51327	AHSP	-0.408	0.078	FALSE	-0.318	0.014	FALSE	-0.245	0.015	FALSE	-0.137	-0.104	FALSE	-0.031	-0.857	FALSE
57379	AICDA	-0.226	-0.108	FALSE	-0.182	-0.109	FALSE	-0.15	-0.075	FALSE	-0.086	-0.121	FALSE	-0.025	-0.159	FALSE
64853	AIDA	-0.615	-0.144	TRUE	-0.52	-0.232	TRUE	-0.476	-0.162	TRUE	-0.422	-0.042	TRUE	-0.256	0.201	TRUE
199	AIF1	-0.256	0.062	FALSE	-0.186	0.09	FALSE	-0.11	0.167	FALSE	-0.063	0.239	FALSE	-0.03	0.648	FALSE
83543	AIF1L	-0.341	-0.05	FALSE	-0.306	-0.061	FALSE	-0.222	-0.181	FALSE	-0.168	-0.169	FALSE	-0.08	-0.265	FALSE
9131	AIFM1	-0.987	0.019	TRUE	-0.835	0.061	TRUE	-0.695	0.042	TRUE	-0.586	0.04	TRUE	-0.432	0.08	TRUE
84883	AIFM2	-0.427	-0.01	FALSE	-0.385	-0.01	FALSE	-0.315	0.029	FALSE	-0.231	0.071	FALSE	-0.126	0.147	FALSE
150209	AIFM3	-0.243	0.054	FALSE	-0.215	-0.031	FALSE	-0.182	0.051	FALSE	-0.125	0.067	FALSE	-0.042	0.138	FALSE
51390	AIG1	-0.997	0.274	TRUE	-0.782	0.34	TRUE	-0.647	0.384	TRUE	-0.509	0.462	TRUE	-0.262	0.415	TRUE
9447	AIM2	-0.734	0.191	TRUE	-0.605	0.238	TRUE	-0.527	0.236	TRUE	-0.397	0.215	TRUE	-0.206	0.046	TRUE
9255	AIMP1	-0.184	0.055	FALSE	-0.131	0.098	FALSE	-0.078	0.087	FALSE	-0.043	0.09	FALSE	-0.028	-0.067	FALSE
7965	AIMP2	-0.505	-0.013	FALSE	-0.445	0.056	FALSE	-0.397	0.074	FALSE	-0.33	-0.034	FALSE	-0.218	-0.011	FALSE
9049	AIP	-0.36	0.145	FALSE	-0.287	0.198	FALSE	-0.226	0.241	FALSE	-0.165	0.281	FALSE	-0.067	0.378	FALSE
23746	AIPL1	-0.456	-0.069	FALSE	-0.387	-0.095	FALSE	-0.321	-0.071	FALSE	-0.259	-0.079	FALSE	-0.15	-0.079	FALSE
326	AIRE	-0.374	-0.139	FALSE	-0.346	-0.13	FALSE	-0.285	-0.15	FALSE	-0.236	-0.091	FALSE	-0.148	-0.127	FALSE
55966	AJAP1	-0.45	-0.084	FALSE	-0.347	-0.142	FALSE	-0.273	-0.165	FALSE	-0.23	-0.21	FALSE	-0.126	-0.267	FALSE
84962	AJUBA	-0.571	0.109	TRUE	-0.435	0.1	TRUE	-0.375	0.097	TRUE	-0.297	0.128	TRUE	-0.2	0.041	TRUE
203	AK1	-0.347	0.017	FALSE	-0.291	0.058	FALSE	-0.229	0.059	FALSE	-0.159	-0.017	FALSE	-0.081	0.012	FALSE
204	AK2	-0.19	0.032	FALSE	-0.141	-0.012	FALSE	-0.091	-0.037	FALSE	-0.03	-0.071	FALSE	-0.021	0.175	FALSE
50808	AK3	-0.508	-0.078	FALSE	-0.419	-0.079	FALSE	-0.341	-0.146	FALSE	-0.274	-0.198	FALSE	-0.173	-0.146	FALSE
205	AK4	-0.495	-0.02	FALSE	-0.379	-0.042	FALSE	-0.314	-0.055	FALSE	-0.261	-0.037	FALSE	-0.144	-0.062	FALSE
26289	AK5	-0.26	0.113	FALSE	-0.191	0.17	FALSE	-0.124	0.187	FALSE	-0.069	0.319	FALSE	0.014	0.404	FALSE
122481	AK7	-0.35	-0.118	FALSE	-0.299	-0.12	FALSE	-0.238	-0.153	FALSE	-0.169	-0.179	FALSE	-0.086	-0.311	FALSE
158067	AK8	-0.462	-0.159	FALSE	-0.394	-0.168	FALSE	-0.323	-0.175	FALSE	-0.246	-0.22	FALSE	-0.158	-0.226	FALSE
221264	AK9	-0.297	-0.278	FALSE	-0.218	-0.269	FALSE	-0.178	-0.255	FALSE	-0.143	-0.318	FALSE	-0.03	-0.915	FALSE
8165	AKAP1	-0.565	0.029	TRUE	-0.494	0.032	TRUE	-0.401	-0.003	TRUE	-0.325	-0.014	TRUE	-0.232	-0.1	TRUE
11216	AKAP10	-0.486	0.048	FALSE	-0.394	0.057	FALSE	-0.356	0.139	FALSE	-0.291	0.158	FALSE	-0.179	0.176	FALSE
11215	AKAP11	-0.411	0.096	FALSE	-0.318	0.122	FALSE	-0.236	0.145	FALSE	-0.161	0.066	FALSE	-0.063	-0.014	FALSE
9590	AKAP12	-0.402	0.001	FALSE	-0.33	0.007	FALSE	-0.263	0.003	FALSE	-0.199	-0.011	FALSE	-0.125	-0.012	FALSE
11214	AKAP13	-0.492	0.084	FALSE	-0.414	0.174	FALSE	-0.381	0.231	FALSE	-0.285	0.199	FALSE	-0.16	0.231	FALSE
158798	AKAP14	-0.42	0.095	FALSE	-0.321	0.079	FALSE	-0.269	0.071	FALSE	-0.194	0.079	FALSE	-0.097	-0.071	FALSE
8227	AKAP17A	-0.435	-0.17	FALSE	-0.393	-0.144	FALSE	-0.342	-0.161	FALSE	-0.297	-0.157	FALSE	-0.198	-0.051	FALSE
11217	AKAP2	-0.406	-0.045	FALSE	-0.359	-0.025	FALSE	-0.277	-0.051	FALSE	-0.189	-0.138	FALSE	-0.036	-0.865	FALSE
10566	AKAP3	-0.369	0.032	FALSE	-0.225	-0.024	FALSE	-0.167	0.029	FALSE	-0.09	-0.025	FALSE	-0.025	0.007	FALSE
9495	AKAP5	-0.439	-0.002	FALSE	-0.393	0.104	FALSE	-0.354	0.094	FALSE	-0.257	0.077	FALSE	-0.138	-0.081	FALSE
9472	AKAP6	-0.265	0.233	FALSE	-0.209	0.264	FALSE	-0.129	0.283	FALSE	-0.077	0.391	FALSE	-0.025	0.678	FALSE
9465	AKAP7	-0.347	-0.033	FALSE	-0.28	-0.083	FALSE	-0.235	-0.13	FALSE	-0.188	-0.155	FALSE	-0.119	-0.204	FALSE
10270	AKAP8	-0.423	0.056	FALSE	-0.351	0.122	FALSE	-0.291	0.109	FALSE	-0.243	0.102	FALSE	-0.138	0.176	FALSE
26993	AKAP8L	-0.365	-0.143	FALSE	-0.314	-0.22	FALSE	-0.277	-0.211	FALSE	-0.217	-0.28	FALSE	-0.14	-0.32	FALSE
10142	AKAP9	-0.427	-0.034	FALSE	-0.36	0.035	FALSE	-0.284	0.056	FALSE	-0.197	0.018	FALSE	-0.106	-0.024	FALSE
56672	AKIP1	-0.235	-0.177	FALSE	-0.188	-0.132	FALSE	-0.148	-0.093	FALSE	-0.101	-0.053	FALSE	-0.028	-0.1	FALSE
79647	AKIRIN1	-0.186	-0.168	FALSE	-0.166	-0.134	FALSE	-0.139	-0.133	FALSE	-0.114	-0.065	FALSE	-0.067	-0.014	FALSE
80709	AKNA	-0.396	-0.047	FALSE	-0.331	0.011	FALSE	-0.28	0.051	FALSE	-0.231	0.035	FALSE	-0.133	0.007	FALSE
10327	AKR1A1	-0.635	0.2	TRUE	-0.584	0.278	TRUE	-0.471	0.228	TRUE	-0.349	0.131	TRUE	-0.213	0.129	TRUE
231	AKR1B1	-0.437	-0.122	FALSE	-0.355	-0.089	FALSE	-0.309	-0.099	FALSE	-0.244	-0.133	FALSE	-0.176	-0.12	FALSE
57016	AKR1B10	-0.398	-0.098	FALSE	-0.305	-0.086	FALSE	-0.245	-0.048	FALSE	-0.167	-0.044	FALSE	-0.068	-0.03	FALSE
441282	AKR1B15	-0.444	-0.085	FALSE	-0.351	-0.065	FALSE	-0.271	-0.107	FALSE	-0.211	-0.13	FALSE	-0.099	-0.451	FALSE
1645	AKR1C1	-0.239	0.025	FALSE	-0.178	0.036	FALSE	-0.12	0.027	FALSE	-0.07	-0.013	FALSE	-0.004	0.033	FALSE
1646	AKR1C2	-0.682	0.162	TRUE	-0.587	0.073	TRUE	-0.469	0.061	TRUE	-0.362	0.089	TRUE	-0.237	0.105	TRUE
8644	AKR1C3	-0.424	0.091	FALSE	-0.348	-0.024	FALSE	-0.294	0.008	FALSE	-0.23	0.017	FALSE	-0.136	0.062	FALSE
1109	AKR1C4	-0.494	0.141	FALSE	-0.447	0.214	FALSE	-0.348	0.148	FALSE	-0.257	0.084	FALSE	-0.146	0.2	FALSE
6718	AKR1D1	-0.357	0.114	FALSE	-0.295	0.112	FALSE	-0.238	0.129	FALSE	-0.165	0.157	FALSE	-0.073	0.212	FALSE
83592	AKR1E2	-0.206	-0.004	FALSE	-0.162	0.029	FALSE	-0.133	0.068	FALSE	-0.084	0.054	FALSE	-0.01	0.075	FALSE
8574	AKR7A2	-0.309	-0.006	FALSE	-0.286	-0.031	FALSE	-0.238	-0.014	FALSE	-0.188	0.05	FALSE	-0.087	0.088	FALSE
22977	AKR7A3	-0.447	-0.009	FALSE	-0.385	-0.053	FALSE	-0.311	-0.075	FALSE	-0.24	-0.053	FALSE	-0.159	-0.114	FALSE
246181	AKR7L	-0.375	0.321	FALSE	-0.226	0.305	FALSE	-0.195	0.444	FALSE	-0.103	0.486	FALSE	0.016	0.727	FALSE
207	AKT1	-0.526	-0.05	FALSE	-0.435	-0.003	FALSE	-0.355	-0.064	FALSE	-0.247	-0.097	FALSE	-0.158	-0.089	FALSE
84335	AKT1S1	-0.422	-0.029	FALSE	-0.296	-0.033	FALSE	-0.237	-0.051	FALSE	-0.151	-0.082	FALSE	-0.057	-0.181	FALSE
208	AKT2	-0.456	0.127	FALSE	-0.375	0.222	FALSE	-0.271	0.237	FALSE	-0.197	0.268	FALSE	-0.067	0.404	FALSE
10000	AKT3	-0.443	0.107	FALSE	-0.302	0.074	FALSE	-0.219	0.067	FALSE	-0.144	0.088	FALSE	-0.039	0.102	FALSE
64400	AKTIP	-0.33	0.142	FALSE	-0.299	0.177	FALSE	-0.211	0.167	FALSE	-0.15	0.214	FALSE	-0.045	0.41	FALSE
210	ALAD	-0.307	0.054	FALSE	-0.243	0.127	FALSE	-0.178	0.12	FALSE	-0.119	0.091	FALSE	-0.042	0.046	FALSE
211	ALAS1	-0.328	-0.011	FALSE	-0.249	-0.028	FALSE	-0.185	0.005	FALSE	-0.135	0.109	FALSE	-0.033	0.12	FALSE
212	ALAS2	-0.351	0.005	FALSE	-0.303	-0.004	FALSE	-0.215	-0.005	FALSE	-0.146	0.015	FALSE	-0.061	0.074	FALSE
213	ALB	-0.477	-0.025	FALSE	-0.39	0.019	FALSE	-0.356	0.046	FALSE	-0.283	0.014	FALSE	-0.168	0.023	FALSE
214	ALCAM	-0.411	0.214	FALSE	-0.363	0.129	FALSE	-0.276	0.145	FALSE	-0.205	0.114	FALSE	-0.094	0.049	FALSE
126133	ALDH16A1	-0.484	-0.061	FALSE	-0.38	-0.014	FALSE	-0.315	-0.003	FALSE	-0.26	0.02	FALSE	-0.166	0.088	FALSE
5832	ALDH18A1	-0.88	0.046	TRUE	-0.592	-0.007	TRUE	-0.469	0.032	TRUE	-0.328	-0.016	TRUE	-0.2	0.006	TRUE
216	ALDH1A1	-0.275	-0.133	FALSE	-0.209	-0.127	FALSE	-0.17	-0.112	FALSE	-0.11	-0.153	FALSE	-0.045	-0.228	FALSE
8854	ALDH1A2	-0.584	0.048	TRUE	-0.511	0.104	TRUE	-0.443	0.082	TRUE	-0.376	0.114	TRUE	-0.266	0.063	TRUE
220	ALDH1A3	-0.381	0.002	FALSE	-0.301	-0.024	FALSE	-0.271	-0.028	FALSE	-0.223	-0.039	FALSE	-0.145	-0.049	FALSE
219	ALDH1B1	-0.448	-0.08	FALSE	-0.4	-0.057	FALSE	-0.369	-0.086	FALSE	-0.269	-0.232	FALSE	-0.188	-0.109	FALSE
10840	ALDH1L1	-0.465	0.272	FALSE	-0.363	0.282	FALSE	-0.267	0.293	FALSE	-0.199	0.407	FALSE	-0.077	0.612	FALSE
160428	ALDH1L2	-0.478	0.082	FALSE	-0.284	0.102	FALSE	-0.177	0.113	FALSE	-0.108	0.157	FALSE	-0.025	0.059	FALSE
217	ALDH2	-0.601	-0.013	TRUE	-0.478	-0.089	TRUE	-0.42	-0.044	TRUE	-0.37	0.02	TRUE	-0.251	0.041	TRUE
218	ALDH3A1	-0.364	-0.179	FALSE	-0.336	-0.193	FALSE	-0.288	-0.165	FALSE	-0.224	-0.194	FALSE	-0.15	-0.173	FALSE
222	ALDH3B2	-0.454	-0.119	FALSE	-0.347	-0.131	FALSE	-0.279	-0.164	FALSE	-0.214	-0.128	FALSE	-0.12	-0.143	FALSE
8659	ALDH4A1	-0.344	0.009	FALSE	-0.307	0.047	FALSE	-0.264	0.092	FALSE	-0.181	0.062	FALSE	-0.094	0.045	FALSE
7915	ALDH5A1	-0.307	-0.108	FALSE	-0.256	-0.121	FALSE	-0.211	-0.127	FALSE	-0.172	-0.133	FALSE	-0.1	-0.111	FALSE
501	ALDH7A1	-0.406	-0.04	FALSE	-0.336	-0.031	FALSE	-0.296	-0.012	FALSE	-0.229	0.018	FALSE	-0.102	0.011	FALSE
64577	ALDH8A1	-0.392	0.021	FALSE	-0.294	0.012	FALSE	-0.226	0.002	FALSE	-0.156	-0.02	FALSE	-0.073	-0.036	FALSE
223	ALDH9A1	-0.49	0.222	FALSE	-0.421	0.342	FALSE	-0.339	0.343	FALSE	-0.269	0.442	FALSE	-0.141	0.658	FALSE
226	ALDOA	-1.115	-0.076	TRUE	-1.04	-0.04	TRUE	-0.948	-0.062	TRUE	-0.858	-0.061	TRUE	-0.694	-0.075	TRUE
229	ALDOB	-0.39	0.194	FALSE	-0.346	0.321	FALSE	-0.281	0.321	FALSE	-0.184	0.442	FALSE	-0.064	0.573	FALSE
230	ALDOC	-0.627	0.015	TRUE	-0.581	0.062	TRUE	-0.457	0.021	TRUE	-0.392	0.057	TRUE	-0.283	0.023	TRUE
56052	ALG1	-0.479	0.004	FALSE	-0.431	0.115	FALSE	-0.404	0.231	FALSE	-0.341	0.265	FALSE	-0.177	0.437	FALSE
84920	ALG10	-0.381	-0.014	FALSE	-0.337	-0.02	FALSE	-0.291	-0.019	FALSE	-0.219	-0.001	FALSE	-0.141	-0.037	FALSE
144245	ALG10B	-0.893	-0.105	TRUE	-0.771	-0.078	TRUE	-0.651	-0.093	TRUE	-0.575	-0.112	TRUE	-0.473	-0.074	TRUE
440138	ALG11	-0.71	0.123	TRUE	-0.653	0.192	TRUE	-0.606	0.28	TRUE	-0.572	0.388	TRUE	-0.515	0.941	TRUE
79087	ALG12	-0.426	0.192	FALSE	-0.335	0.201	FALSE	-0.226	0.252	FALSE	-0.178	0.297	FALSE	-0.073	0.428	FALSE
79868	ALG13	-0.708	0.135	TRUE	-0.642	0.261	TRUE	-0.593	0.385	TRUE	-0.545	0.553	TRUE	-0.228	0.79	TRUE
200810	ALG1L	-0.362	0.03	FALSE	-0.318	0.071	FALSE	-0.289	0.113	FALSE	-0.252	0.149	FALSE	-0.177	0.464	FALSE
85365	ALG2	-0.603	0.169	TRUE	-0.557	0.286	TRUE	-0.521	0.369	TRUE	-0.475	0.498	TRUE	-0.177	0.583	TRUE
10195	ALG3	-0.282	0.096	FALSE	-0.197	0.077	FALSE	-0.156	0.113	FALSE	-0.096	0.107	FALSE	-0.004	0.28	FALSE
29880	ALG5	-0.552	0.047	TRUE	-0.442	0.045	TRUE	-0.361	-0.01	TRUE	-0.284	0.007	TRUE	-0.198	0.014	TRUE
29929	ALG6	-0.306	0.22	FALSE	-0.25	0.322	FALSE	-0.175	0.349	FALSE	-0.094	0.431	FALSE	0.012	0.552	FALSE
79053	ALG8	-0.307	0.069	FALSE	-0.235	-0.057	FALSE	-0.211	0.001	FALSE	-0.165	0.011	FALSE	-0.058	-0.038	FALSE
79796	ALG9	-0.333	0.097	FALSE	-0.271	0.062	FALSE	-0.212	0.107	FALSE	-0.162	0.187	FALSE	-0.054	0.089	FALSE
238	ALK	-0.322	0.034	FALSE	-0.269	0.055	FALSE	-0.178	-0.031	FALSE	-0.115	-0.027	FALSE	-0.037	0.079	FALSE
389658	ALKAL1	-0.317	0.054	FALSE	-0.261	0.074	FALSE	-0.21	0.064	FALSE	-0.103	-0.116	FALSE	-0.026	-0.689	FALSE
8846	ALKBH1	-0.343	-0.048	FALSE	-0.265	-0.129	FALSE	-0.202	-0.126	FALSE	-0.133	-0.147	FALSE	-0.056	-0.436	FALSE
121642	ALKBH2	-0.339	-0.006	FALSE	-0.244	-0.051	FALSE	-0.197	0.008	FALSE	-0.12	0.017	FALSE	-0.048	0.165	FALSE
221120	ALKBH3	-0.489	-0.085	FALSE	-0.431	-0.086	FALSE	-0.379	-0.039	FALSE	-0.319	-0.046	FALSE	-0.23	-0.007	FALSE
54784	ALKBH4	-0.329	0.131	FALSE	-0.255	0.187	FALSE	-0.17	0.19	FALSE	-0.098	0.224	FALSE	-0.027	0.313	FALSE
54890	ALKBH5	-0.386	-0.013	FALSE	-0.334	-0.022	FALSE	-0.26	-0.046	FALSE	-0.208	-0.022	FALSE	-0.118	-0.007	FALSE
84266	ALKBH7	-0.349	0.171	FALSE	-0.241	0.102	FALSE	-0.185	0.166	FALSE	-0.119	0.164	FALSE	-0.035	0.239	FALSE
91801	ALKBH8	-0.364	0.038	FALSE	-0.296	0.096	FALSE	-0.216	0.083	FALSE	-0.143	0.122	FALSE	-0.027	0.061	FALSE
55821	ALLC	-0.4	0.285	FALSE	-0.302	0.218	FALSE	-0.252	0.28	FALSE	-0.197	0.267	FALSE	-0.075	0.121	FALSE
7840	ALMS1	-0.338	0.168	FALSE	-0.282	0.256	FALSE	-0.219	0.312	FALSE	-0.149	0.302	FALSE	-0.036	0.233	FALSE
239	ALOX12	-0.307	0.119	FALSE	-0.232	0.122	FALSE	-0.187	0.134	FALSE	-0.122	0.159	FALSE	-0.029	0.217	FALSE
242	ALOX12B	-0.327	0.06	FALSE	-0.254	0.105	FALSE	-0.164	0.109	FALSE	-0.094	0.127	FALSE	-0.03	0.335	FALSE
246	ALOX15	-0.423	-0.048	FALSE	-0.359	0.006	FALSE	-0.258	0.011	FALSE	-0.198	0.066	FALSE	-0.115	0.18	FALSE
247	ALOX15B	-0.563	0.207	TRUE	-0.48	0.16	TRUE	-0.375	0.14	TRUE	-0.293	0.083	TRUE	-0.179	0.102	TRUE
240	ALOX5	-0.42	0.215	FALSE	-0.285	0.07	FALSE	-0.224	0.086	FALSE	-0.171	0.151	FALSE	-0.073	0.158	FALSE
241	ALOX5AP	-0.442	-0.009	FALSE	-0.345	0.032	FALSE	-0.287	0.061	FALSE	-0.211	0.002	FALSE	-0.132	0.062	FALSE
59344	ALOXE3	-0.699	0.082	TRUE	-0.583	0.04	TRUE	-0.492	0.009	TRUE	-0.427	0.001	TRUE	-0.306	-0.013	TRUE
251	ALPG	-0.438	0.063	FALSE	-0.359	0.126	FALSE	-0.298	0.19	FALSE	-0.224	0.223	FALSE	-0.132	0.261	FALSE
248	ALPI	-0.455	-0.138	FALSE	-0.336	-0.167	FALSE	-0.297	-0.194	FALSE	-0.229	-0.216	FALSE	-0.153	-0.222	FALSE
80216	ALPK1	-0.489	0.032	FALSE	-0.396	0.033	FALSE	-0.33	-0.014	FALSE	-0.244	-0.09	FALSE	-0.146	-0.222	FALSE
115701	ALPK2	-0.365	0.042	FALSE	-0.3	0.098	FALSE	-0.211	0.041	FALSE	-0.16	0.07	FALSE	-0.089	0.147	FALSE
57538	ALPK3	-0.329	0.09	FALSE	-0.281	0.018	FALSE	-0.248	0.036	FALSE	-0.188	0.098	FALSE	-0.104	0.234	FALSE
249	ALPL	-0.413	0.133	FALSE	-0.305	0.069	FALSE	-0.257	0.078	FALSE	-0.173	0.039	FALSE	-0.071	-0.05	FALSE
250	ALPP	-0.363	0.158	FALSE	-0.189	0.128	FALSE	-0.157	0.159	FALSE	-0.093	0.283	FALSE	0.002	0.389	FALSE
57679	ALS2	-0.427	0.041	FALSE	-0.375	0.099	FALSE	-0.24	0.131	FALSE	-0.176	0.104	FALSE	-0.106	0.18	FALSE
259173	ALS2CL	-0.412	0.066	FALSE	-0.33	0.025	FALSE	-0.267	0.014	FALSE	-0.232	0.036	FALSE	-0.123	0.087	FALSE
130540	FLACC1	-0.092	0.073	FALSE	-0.051	0.007	FALSE	-0.034	0.028	FALSE	-0.028	0.166	FALSE	-0.024	0.355	FALSE
8092	ALX1	-0.36	-0.048	FALSE	-0.297	-0.047	FALSE	-0.254	-0.072	FALSE	-0.207	-0.067	FALSE	-0.148	0.054	FALSE
257	ALX3	-0.361	0.124	FALSE	-0.29	0.017	FALSE	-0.235	0.036	FALSE	-0.173	0.05	FALSE	-0.091	0.065	FALSE
60529	ALX4	-0.305	-0.084	FALSE	-0.247	-0.079	FALSE	-0.193	-0.08	FALSE	-0.138	-0.038	FALSE	-0.07	-0.033	FALSE
10189	ALYREF	-2.022	-0.081	TRUE	-1.826	-0.059	TRUE	-1.741	-0.068	TRUE	-1.598	-0.126	TRUE	-1.386	-0.187	TRUE
23600	AMACR	-0.322	0.075	FALSE	-0.258	0.095	FALSE	-0.186	0.085	FALSE	-0.095	-0.021	FALSE	-0.024	-0.11	FALSE
258	AMBN	-0.119	-0.186	FALSE	-0.076	-0.168	FALSE	-0.047	-0.142	FALSE	-0.032	-0.165	FALSE	-0.026	-0.06	FALSE
259	AMBP	-0.419	-0.128	FALSE	-0.375	-0.081	FALSE	-0.307	-0.059	FALSE	-0.235	-0.084	FALSE	-0.137	-0.068	FALSE
55626	AMBRA1	-0.527	-0.091	FALSE	-0.395	-0.159	FALSE	-0.325	-0.209	FALSE	-0.285	-0.231	FALSE	-0.179	-0.133	FALSE
262	AMD1	-0.634	-0.084	TRUE	-0.585	-0.16	TRUE	-0.527	-0.153	TRUE	-0.461	-0.172	TRUE	-0.362	-0.16	TRUE
144193	AMDHD1	-0.292	0.002	FALSE	-0.267	0.046	FALSE	-0.203	0.08	FALSE	-0.121	0.051	FALSE	-0.028	-0.067	FALSE
51005	AMDHD2	-0.291	-0.041	FALSE	-0.193	-0.002	FALSE	-0.14	-0.088	FALSE	-0.09	-0.023	FALSE	-0.025	0.026	FALSE
265	AMELX	-0.298	0.168	FALSE	-0.219	0.077	FALSE	-0.165	0.077	FALSE	-0.116	0.07	FALSE	-0.034	-0.113	FALSE
139285	AMER1	-1.18	-0.01	TRUE	-1.094	0.088	TRUE	-0.973	0.183	TRUE	-0.832	0.336	TRUE	-0.679	0.226	TRUE
205147	AMER3	-0.159	0.024	FALSE	-0.081	-0.092	FALSE	-0.046	-0.067	FALSE	-0.033	-0.02	FALSE	-0.026	0.084	FALSE
267	AMFR	-0.336	0.03	FALSE	-0.262	0.038	FALSE	-0.182	0.063	FALSE	-0.137	0.144	FALSE	-0.044	0.253	FALSE
268	AMH	-0.39	-0.034	FALSE	-0.294	0.017	FALSE	-0.232	-0.034	FALSE	-0.187	-0.02	FALSE	-0.099	-0.128	FALSE
269	AMHR2	-0.373	0	FALSE	-0.308	0.055	FALSE	-0.218	0.003	FALSE	-0.176	0.043	FALSE	-0.066	0.067	FALSE
57463	AMIGO1	-0.361	0.11	FALSE	-0.264	-0.044	FALSE	-0.2	-0.02	FALSE	-0.148	-0.025	FALSE	-0.043	-0.181	FALSE
347902	AMIGO2	-0.452	-0.128	FALSE	-0.339	-0.155	FALSE	-0.24	-0.231	FALSE	-0.18	-0.277	FALSE	-0.115	-0.331	FALSE
386724	AMIGO3	-0.467	-0.129	FALSE	-0.389	-0.12	FALSE	-0.319	-0.185	FALSE	-0.237	-0.35	FALSE	-0.107	-0.458	FALSE
9949	AMMECR1	-0.743	0.361	TRUE	-0.642	0.312	TRUE	-0.562	0.274	TRUE	-0.469	0.16	TRUE	-0.202	-0.018	TRUE
81693	AMN	-0.419	0.119	FALSE	-0.362	0.019	FALSE	-0.275	-0.019	FALSE	-0.188	-0.087	FALSE	-0.059	-0.723	FALSE
196394	AMN1	-0.173	0.157	FALSE	-0.129	0.136	FALSE	-0.073	0.112	FALSE	-0.031	0.117	FALSE	-0.023	0.158	FALSE
154796	AMOT	-0.59	-0.067	TRUE	-0.476	-0.047	TRUE	-0.434	-0.058	TRUE	-0.322	-0.18	TRUE	-0.147	-0.259	TRUE
154810	AMOTL1	-0.468	-0.092	FALSE	-0.409	-0.138	FALSE	-0.355	-0.197	FALSE	-0.301	-0.248	FALSE	-0.158	-0.21	FALSE
51421	AMOTL2	-0.394	0.589	FALSE	-0.246	0.412	FALSE	-0.177	0.308	FALSE	-0.103	0.247	FALSE	-0.025	-0.46	FALSE
270	AMPD1	-0.571	-0.024	TRUE	-0.436	-0.037	TRUE	-0.36	-0.062	TRUE	-0.305	-0.061	TRUE	-0.217	0.033	TRUE
271	AMPD2	-0.2	-0.002	FALSE	-0.126	0.022	FALSE	-0.084	0.016	FALSE	-0.04	0.016	FALSE	-0.022	0.238	FALSE
272	AMPD3	-0.525	0.114	FALSE	-0.407	0.122	FALSE	-0.351	0.075	FALSE	-0.264	0.097	FALSE	-0.144	-0.051	FALSE
273	AMPH	-0.299	-0.083	FALSE	-0.266	-0.152	FALSE	-0.227	-0.135	FALSE	-0.175	-0.145	FALSE	-0.084	-0.241	FALSE
275	AMT	-0.482	-0.047	FALSE	-0.41	-0.131	FALSE	-0.349	-0.166	FALSE	-0.274	-0.196	FALSE	-0.196	-0.131	FALSE
401138	AMTN	-0.388	-0.052	FALSE	-0.293	-0.117	FALSE	-0.24	-0.103	FALSE	-0.142	-0.286	FALSE	-0.028	-0.922	FALSE
279	AMY2A	-0.398	0.136	FALSE	-0.279	0.099	FALSE	-0.253	0.131	FALSE	-0.199	0.169	FALSE	-0.1	0.094	FALSE
280	AMY2B	-0.104	0.303	FALSE	-0.052	0.342	FALSE	-0.037	0.484	FALSE	-0.029	0.79	FALSE	-0.01	1.593	FALSE
155185	AMZ1	-0.229	-0.038	FALSE	-0.167	-0.09	FALSE	-0.121	-0.106	FALSE	-0.075	-0.14	FALSE	-0.035	-0.32	FALSE
51321	AMZ2	-0.386	0.035	FALSE	-0.282	0.004	FALSE	-0.217	0.001	FALSE	-0.135	-0.001	FALSE	-0.059	-0.055	FALSE
64682	ANAPC1	-2.028	0.099	TRUE	-1.778	0.152	TRUE	-1.633	0.213	TRUE	-1.428	0.259	TRUE	-1.229	0.129	TRUE
10393	ANAPC10	-0.493	0.099	FALSE	-0.372	0.089	FALSE	-0.318	0.13	FALSE	-0.25	0.145	FALSE	-0.166	0.144	FALSE
51529	ANAPC11	-0.52	0.197	FALSE	-0.33	0.211	FALSE	-0.225	0.216	FALSE	-0.145	0.251	FALSE	-0.041	0.416	FALSE
25906	ANAPC15	-0.734	-0.207	TRUE	-0.577	-0.238	TRUE	-0.511	-0.199	TRUE	-0.44	-0.16	TRUE	-0.329	-0.177	TRUE
29882	ANAPC2	-0.62	0.134	TRUE	-0.585	0.178	TRUE	-0.539	0.216	TRUE	-0.49	0.321	TRUE	-0.392	0.559	TRUE
29945	ANAPC4	-1.456	-0.105	TRUE	-1.32	-0.121	TRUE	-1.222	-0.128	TRUE	-1.059	-0.177	TRUE	-0.881	-0.216	TRUE
51433	ANAPC5	-1.64	0.001	TRUE	-1.496	-0.013	TRUE	-1.394	-0.016	TRUE	-1.266	-0.049	TRUE	-1.081	-0.178	TRUE
51434	ANAPC7	-0.369	-0.228	FALSE	-0.293	-0.22	FALSE	-0.247	-0.263	FALSE	-0.204	-0.267	FALSE	-0.076	-0.659	FALSE
283	ANG	-0.876	-0.13	TRUE	-0.708	-0.124	TRUE	-0.612	-0.066	TRUE	-0.525	0.048	TRUE	-0.375	0.259	TRUE
23357	ANGEL1	-0.408	0.038	FALSE	-0.303	-0.036	FALSE	-0.237	-0.002	FALSE	-0.168	-0.032	FALSE	-0.061	-0.185	FALSE
90806	ANGEL2	-0.714	-0.001	TRUE	-0.593	-0.014	TRUE	-0.52	0.019	TRUE	-0.448	0.019	TRUE	-0.335	0.109	TRUE
285	ANGPT2	-0.269	-0.077	FALSE	-0.203	-0.031	FALSE	-0.148	-0.005	FALSE	-0.097	0.015	FALSE	-0.028	-0.076	FALSE
51378	ANGPT4	-0.698	0.178	TRUE	-0.595	0.141	TRUE	-0.545	0.183	TRUE	-0.475	0.249	TRUE	-0.308	0.377	TRUE
9068	ANGPTL1	-0.298	0.192	FALSE	-0.204	0.198	FALSE	-0.153	0.165	FALSE	-0.059	0.134	FALSE	-0.023	-0.028	FALSE
23452	ANGPTL2	-0.312	-0.206	FALSE	-0.25	-0.271	FALSE	-0.219	-0.289	FALSE	-0.166	-0.465	FALSE	-0.073	-0.643	FALSE
51129	ANGPTL4	-0.364	-0.058	FALSE	-0.303	-0.042	FALSE	-0.239	-0.063	FALSE	-0.162	-0.077	FALSE	-0.046	-0.237	FALSE
253935	ANGPTL5	-0.536	0.36	FALSE	-0.368	0.347	FALSE	-0.307	0.305	FALSE	-0.171	0.252	FALSE	-0.047	0.25	FALSE
83854	ANGPTL6	-0.403	-0.146	FALSE	-0.313	-0.207	FALSE	-0.263	-0.236	FALSE	-0.191	-0.318	FALSE	-0.082	-0.616	FALSE
10218	ANGPTL7	-0.515	-0.272	FALSE	-0.417	-0.328	FALSE	-0.34	-0.358	FALSE	-0.277	-0.31	FALSE	-0.169	-0.177	FALSE
55908	ANGPTL8	-0.323	-0.071	FALSE	-0.219	-0.114	FALSE	-0.156	-0.179	FALSE	-0.108	-0.298	FALSE	-0.031	-0.623	FALSE
286	ANK1	-0.315	0.206	FALSE	-0.265	0.235	FALSE	-0.208	0.259	FALSE	-0.136	0.354	FALSE	-0.022	0.479	FALSE
287	ANK2	-0.307	-0.07	FALSE	-0.253	-0.053	FALSE	-0.202	-0.059	FALSE	-0.15	0	FALSE	-0.061	0.002	FALSE
288	ANK3	-0.24	-0.162	FALSE	-0.173	-0.138	FALSE	-0.138	-0.069	FALSE	-0.076	-0.066	FALSE	-0.005	-0.023	FALSE
150709	ANKAR	-0.561	0.069	TRUE	-0.407	0.083	TRUE	-0.306	0.027	TRUE	-0.232	-0.115	TRUE	-0.12	-0.36	TRUE
63926	ANKEF1	-0.255	0.08	FALSE	-0.207	0.149	FALSE	-0.152	0.14	FALSE	-0.077	0.07	FALSE	-0.022	0.108	FALSE
162282	ANKFN1	-0.734	0.161	TRUE	-0.649	0.047	TRUE	-0.573	0.04	TRUE	-0.461	0.005	TRUE	-0.326	0.367	TRUE
51479	ANKFY1	-0.361	-0.055	FALSE	-0.303	-0.022	FALSE	-0.242	-0.004	FALSE	-0.175	-0.011	FALSE	-0.1	0.053	FALSE
56172	ANKH	-0.645	0.325	TRUE	-0.528	0.242	TRUE	-0.443	0.232	TRUE	-0.39	0.27	TRUE	-0.246	0.31	TRUE
54882	ANKHD1	-0.259	-0.006	FALSE	-0.212	0.017	FALSE	-0.154	0.026	FALSE	-0.095	0.053	FALSE	-0.028	0.09	FALSE
54467	ANKIB1	-0.23	-0.169	FALSE	-0.162	-0.267	FALSE	-0.101	-0.299	FALSE	-0.073	-0.307	FALSE	-0.027	-0.528	FALSE
255239	ANKK1	-0.489	-0.045	FALSE	-0.395	-0.01	FALSE	-0.346	0.007	FALSE	-0.287	0.04	FALSE	-0.191	0.087	FALSE
126549	ANKLE1	-0.209	-0.172	FALSE	-0.146	-0.163	FALSE	-0.098	-0.242	FALSE	-0.065	-0.313	FALSE	-0.033	-0.528	FALSE
23141	ANKLE2	-0.893	0.236	TRUE	-0.788	0.277	TRUE	-0.743	0.362	TRUE	-0.705	0.565	TRUE	-0.634	1.255	TRUE
51281	ANKMY1	-0.434	-0.021	FALSE	-0.351	-0.086	FALSE	-0.296	-0.101	FALSE	-0.221	-0.193	FALSE	-0.072	-0.646	FALSE
57037	ANKMY2	-0.317	-0.072	FALSE	-0.246	-0.08	FALSE	-0.177	-0.106	FALSE	-0.107	-0.135	FALSE	-0.031	-0.61	FALSE
57763	ANKRA2	-0.329	-0.043	FALSE	-0.259	-0.037	FALSE	-0.188	-0.036	FALSE	-0.124	-0.013	FALSE	-0.048	-0.005	FALSE
27063	ANKRD1	-0.069	0.117	FALSE	-0.029	0.075	FALSE	-0.025	0.144	FALSE	-0.024	0.275	FALSE	-0.022	0.639	FALSE
55608	ANKRD10	-0.205	-0.035	FALSE	-0.171	-0.115	FALSE	-0.136	-0.119	FALSE	-0.085	-0.122	FALSE	-0.027	-0.427	FALSE
29123	ANKRD11	-0.794	0.157	TRUE	-0.624	0.049	TRUE	-0.521	0.068	TRUE	-0.435	0.076	TRUE	-0.275	0.077	TRUE
23253	ANKRD12	-0.328	-0.209	FALSE	-0.276	-0.187	FALSE	-0.218	-0.207	FALSE	-0.182	-0.214	FALSE	-0.095	-0.306	FALSE
88455	ANKRD13A	-0.311	-0.08	FALSE	-0.252	-0.07	FALSE	-0.199	-0.062	FALSE	-0.12	-0.061	FALSE	-0.037	-0.112	FALSE
124930	ANKRD13B	-0.245	-0.121	FALSE	-0.14	-0.177	FALSE	-0.097	-0.23	FALSE	-0.048	-0.259	FALSE	-0.022	-0.524	FALSE
81573	ANKRD13C	-0.116	-0.032	FALSE	-0.089	-0.052	FALSE	-0.059	-0.037	FALSE	-0.037	0.055	FALSE	-0.025	0.172	FALSE
338692	ANKRD13D	-0.56	-0.02	TRUE	-0.454	-0.068	TRUE	-0.355	-0.158	TRUE	-0.295	-0.231	TRUE	-0.138	-0.291	TRUE
54522	ANKRD16	-0.379	-0.262	FALSE	-0.333	-0.265	FALSE	-0.303	-0.244	FALSE	-0.231	-0.345	FALSE	-0.116	-0.429	FALSE
26057	ANKRD17	-1.066	0.102	TRUE	-0.965	0.114	TRUE	-0.877	0.183	TRUE	-0.735	0.113	TRUE	-0.543	0.031	TRUE
253650	ANKRD18A	-0.419	-0.19	FALSE	-0.386	-0.196	FALSE	-0.33	-0.204	FALSE	-0.241	-0.278	FALSE	-0.148	-0.258	FALSE
26287	ANKRD2	-0.451	-0.011	FALSE	-0.32	-0.05	FALSE	-0.258	-0.145	FALSE	-0.191	-0.248	FALSE	-0.061	-0.725	FALSE
118932	ANKRD22	-0.528	-0.118	FALSE	-0.482	-0.071	FALSE	-0.373	-0.096	FALSE	-0.28	-0.172	FALSE	-0.116	-0.455	FALSE
200539	ANKRD23	-0.401	-0.051	FALSE	-0.301	-0.088	FALSE	-0.235	-0.14	FALSE	-0.153	-0.215	FALSE	-0.072	-0.606	FALSE
170961	ANKRD24	-0.513	-0.171	FALSE	-0.434	-0.182	FALSE	-0.314	-0.249	FALSE	-0.237	-0.308	FALSE	-0.138	-0.366	FALSE
22852	ANKRD26	-0.356	-0.244	FALSE	-0.288	-0.258	FALSE	-0.246	-0.251	FALSE	-0.204	-0.217	FALSE	-0.117	-0.312	FALSE
84079	ANKRD27	-0.355	-0.127	FALSE	-0.331	-0.149	FALSE	-0.27	-0.234	FALSE	-0.234	-0.212	FALSE	-0.144	-0.265	FALSE
23243	ANKRD28	-0.479	-0.012	FALSE	-0.387	-0.065	FALSE	-0.318	-0.145	FALSE	-0.267	-0.122	FALSE	-0.183	-0.09	FALSE
147463	ANKRD29	-0.385	0.018	FALSE	-0.276	0.055	FALSE	-0.225	0.109	FALSE	-0.162	0.171	FALSE	-0.046	0.288	FALSE
91074	ANKRD30A	-0.406	0.05	FALSE	-0.358	0.096	FALSE	-0.292	0.159	FALSE	-0.221	0.197	FALSE	-0.118	0.216	FALSE
374860	ANKRD30B	-0.467	-0.045	FALSE	-0.393	-0.03	FALSE	-0.331	-0.022	FALSE	-0.239	-0.024	FALSE	-0.128	-0.13	FALSE
256006	ANKRD31	-0.703	0.004	TRUE	-0.57	0.062	TRUE	-0.502	0.015	TRUE	-0.405	-0.084	TRUE	-0.253	0.065	TRUE
341405	ANKRD33	-0.226	0.005	FALSE	-0.174	-0.075	FALSE	-0.123	-0.167	FALSE	-0.07	-0.222	FALSE	-0.029	-0.429	FALSE
651746	ANKRD33B	-0.402	-0.056	FALSE	-0.223	-0.204	FALSE	-0.147	-0.19	FALSE	-0.084	-0.265	FALSE	-0.028	-0.597	FALSE
340120	ANKRD34B	-0.274	0.063	FALSE	-0.181	0.069	FALSE	-0.115	0.087	FALSE	-0.036	0.089	FALSE	-0.027	-0.03	FALSE
390616	ANKRD34C	-0.617	-0.049	TRUE	-0.461	-0.074	TRUE	-0.411	-0.135	TRUE	-0.285	-0.26	TRUE	-0.099	-0.504	TRUE
148741	ANKRD35	-0.285	0.029	FALSE	-0.199	0.088	FALSE	-0.171	0.152	FALSE	-0.099	0.171	FALSE	-0.031	0.286	FALSE
57730	ANKRD36B	-0.462	-0.015	FALSE	-0.404	0.013	FALSE	-0.356	0.035	FALSE	-0.325	0.036	FALSE	-0.264	0.086	FALSE
353322	ANKRD37	-0.374	-0.013	FALSE	-0.293	0.032	FALSE	-0.266	0.055	FALSE	-0.201	-0.016	FALSE	-0.103	-0.126	FALSE
91369	ANKRD40	-0.251	-0.073	FALSE	-0.223	-0.037	FALSE	-0.166	-0.078	FALSE	-0.11	-0.045	FALSE	-0.05	-0.008	FALSE
338699	ANKRD42	-0.407	-0.031	FALSE	-0.327	-0.079	FALSE	-0.288	-0.161	FALSE	-0.223	-0.211	FALSE	-0.097	-0.512	FALSE
91526	ANKRD44	-0.482	0.182	FALSE	-0.419	0.148	FALSE	-0.329	0.064	FALSE	-0.261	0.041	FALSE	-0.136	0.022	FALSE
339416	ANKRD45	-0.385	0.033	FALSE	-0.249	0	FALSE	-0.187	-0.049	FALSE	-0.126	-0.101	FALSE	-0.023	-0.86	FALSE
157567	ANKRD46	-0.359	0	FALSE	-0.312	0.046	FALSE	-0.243	0.031	FALSE	-0.133	-0.041	FALSE	-0.06	-0.142	FALSE
54851	ANKRD49	-0.582	-0.022	TRUE	-0.492	-0.022	TRUE	-0.44	-0.054	TRUE	-0.367	-0.126	TRUE	-0.254	-0.142	TRUE
57182	ANKRD50	-0.403	-0.098	FALSE	-0.293	-0.141	FALSE	-0.222	-0.224	FALSE	-0.15	-0.293	FALSE	-0.054	-0.713	FALSE
79998	ANKRD53	-0.195	0.014	FALSE	-0.136	0.1	FALSE	-0.073	0.083	FALSE	-0.039	0.129	FALSE	-0.028	0.058	FALSE
22881	ANKRD6	-0.348	0.119	FALSE	-0.261	0.13	FALSE	-0.193	0.095	FALSE	-0.119	0.11	FALSE	-0.029	0.04	FALSE
342850	ANKRD62	-0.373	-0.109	FALSE	-0.272	-0.111	FALSE	-0.215	-0.168	FALSE	-0.133	-0.242	FALSE	-0.037	-0.658	FALSE
441869	ANKRD65	-0.402	-0.16	FALSE	-0.337	-0.135	FALSE	-0.23	-0.218	FALSE	-0.175	-0.218	FALSE	-0.055	-0.709	FALSE
100287718	ANKRD66	-0.783	-0.199	TRUE	-0.621	-0.183	TRUE	-0.548	-0.119	TRUE	-0.461	-0.015	TRUE	-0.326	0.378	TRUE
56311	ANKRD7	-0.374	0.104	FALSE	-0.287	0.188	FALSE	-0.224	0.244	FALSE	-0.144	0.13	FALSE	-0.052	0.032	FALSE
23294	ANKS1A	-0.64	0.261	TRUE	-0.423	0.163	TRUE	-0.329	0.149	TRUE	-0.261	0.118	TRUE	-0.128	-0.018	TRUE
124401	ANKS3	-0.239	0.155	FALSE	-0.146	0.161	FALSE	-0.096	-0.009	FALSE	-0.055	0.018	FALSE	-0.03	0.201	FALSE
257629	ANKS4B	-0.302	0.035	FALSE	-0.213	-0.035	FALSE	-0.168	-0.1	FALSE	-0.096	-0.187	FALSE	-0.025	-0.63	FALSE
203286	ANKS6	-0.286	0.019	FALSE	-0.228	0.073	FALSE	-0.191	0.032	FALSE	-0.126	0.035	FALSE	-0.072	0.199	FALSE
55139	ANKZF1	-0.265	-0.104	FALSE	-0.196	-0.137	FALSE	-0.153	-0.183	FALSE	-0.119	-0.198	FALSE	-0.057	-0.306	FALSE
54443	ANLN	-0.872	0.127	TRUE	-0.78	0.217	TRUE	-0.554	0.188	TRUE	-0.434	0.154	TRUE	-0.246	-0.033	TRUE
55107	ANO1	-0.327	-0.109	FALSE	-0.299	-0.023	FALSE	-0.261	-0.052	FALSE	-0.203	0.007	FALSE	-0.122	0.051	FALSE
55129	ANO10	-0.156	-0.204	FALSE	-0.105	-0.146	FALSE	-0.087	-0.128	FALSE	-0.049	-0.248	FALSE	-0.021	-0.495	FALSE
57101	ANO2	-0.358	-0.202	FALSE	-0.245	-0.224	FALSE	-0.168	-0.25	FALSE	-0.121	-0.374	FALSE	-0.036	-0.878	FALSE
63982	ANO3	-0.226	-0.086	FALSE	-0.171	-0.111	FALSE	-0.129	-0.133	FALSE	-0.078	-0.283	FALSE	-0.023	-0.666	FALSE
203859	ANO5	-0.257	-0.117	FALSE	-0.164	-0.188	FALSE	-0.124	-0.192	FALSE	-0.07	-0.273	FALSE	-0.027	-0.465	FALSE
196527	ANO6	-0.105	-0.168	FALSE	-0.056	-0.189	FALSE	-0.032	-0.165	FALSE	-0.026	-0.101	FALSE	-0.023	0.049	FALSE
57719	ANO8	-0.454	-0.12	FALSE	-0.365	-0.116	FALSE	-0.304	-0.141	FALSE	-0.206	-0.282	FALSE	-0.078	-0.622	FALSE
3730	ANOS1	-0.286	-0.065	FALSE	-0.23	-0.115	FALSE	-0.199	-0.051	FALSE	-0.127	-0.041	FALSE	-0.03	-0.111	FALSE
8125	ANP32A	-0.444	0.117	FALSE	-0.345	0.171	FALSE	-0.295	0.183	FALSE	-0.23	0.189	FALSE	-0.11	0.161	FALSE
10541	ANP32B	-0.497	0.125	FALSE	-0.398	0.126	FALSE	-0.307	0.154	FALSE	-0.239	0.236	FALSE	-0.119	0.072	FALSE
23519	ANP32D	-0.399	0.012	FALSE	-0.339	0.045	FALSE	-0.256	0.025	FALSE	-0.169	-0.039	FALSE	-0.039	-0.844	FALSE
81611	ANP32E	-0.443	0.203	FALSE	-0.395	0.164	FALSE	-0.282	0.163	FALSE	-0.206	0.159	FALSE	-0.116	0.179	FALSE
290	ANPEP	-0.4	0.044	FALSE	-0.321	0.018	FALSE	-0.233	0.009	FALSE	-0.172	0.045	FALSE	-0.058	-0.016	FALSE
84168	ANTXR1	-0.604	-0.018	TRUE	-0.502	0.013	TRUE	-0.408	0.015	TRUE	-0.348	-0.03	TRUE	-0.239	0.049	TRUE
118429	ANTXR2	-0.35	0.078	FALSE	-0.261	0.028	FALSE	-0.199	-0.033	FALSE	-0.14	-0.036	FALSE	-0.058	-0.023	FALSE
195977	ANTXRL	-0.219	-0.059	FALSE	-0.171	-0.006	FALSE	-0.118	0.021	FALSE	-0.085	-0.004	FALSE	-0.043	0.107	FALSE
301	ANXA1	-0.248	-0.112	FALSE	-0.197	-0.134	FALSE	-0.142	-0.109	FALSE	-0.081	-0.072	FALSE	-0.021	-0.102	FALSE
11199	ANXA10	-0.322	0.018	FALSE	-0.245	-0.002	FALSE	-0.189	-0.015	FALSE	-0.107	-0.039	FALSE	-0.028	-0.179	FALSE
311	ANXA11	-0.346	0.135	FALSE	-0.243	0.111	FALSE	-0.181	0.109	FALSE	-0.119	0.181	FALSE	-0.028	0.304	FALSE
312	ANXA13	-0.41	0.049	FALSE	-0.347	0.08	FALSE	-0.271	0.046	FALSE	-0.212	0.104	FALSE	-0.106	0.161	FALSE
302	ANXA2	-0.324	0.079	FALSE	-0.271	0.091	FALSE	-0.2	0.072	FALSE	-0.152	0.107	FALSE	-0.059	0.029	FALSE
306	ANXA3	-0.448	0.002	FALSE	-0.364	0.021	FALSE	-0.311	0.017	FALSE	-0.259	0.055	FALSE	-0.109	-0.114	FALSE
307	ANXA4	-0.32	0.162	FALSE	-0.269	0.179	FALSE	-0.205	0.206	FALSE	-0.156	0.281	FALSE	-0.03	0.354	FALSE
308	ANXA5	-0.248	0.123	FALSE	-0.16	0.147	FALSE	-0.089	0.129	FALSE	-0.024	0.183	FALSE	-0.019	0.616	FALSE
309	ANXA6	-0.476	0.013	FALSE	-0.426	0.057	FALSE	-0.338	0.086	FALSE	-0.261	0.076	FALSE	-0.172	0.08	FALSE
310	ANXA7	-0.502	0.219	FALSE	-0.421	0.181	FALSE	-0.35	0.213	FALSE	-0.295	0.22	FALSE	-0.155	0.132	FALSE
8416	ANXA9	-0.586	0.348	TRUE	-0.508	0.325	TRUE	-0.412	0.37	TRUE	-0.36	0.344	TRUE	-0.224	0.319	TRUE
313	AOAH	-0.441	0.008	FALSE	-0.367	0.057	FALSE	-0.323	0.113	FALSE	-0.25	0.147	FALSE	-0.114	0.042	FALSE
26	AOC1	-0.181	0.025	FALSE	-0.136	0.038	FALSE	-0.066	0.042	FALSE	-0.04	0.172	FALSE	-0.024	0.501	FALSE
314	AOC2	-0.215	-0.077	FALSE	-0.177	-0.033	FALSE	-0.134	-0.014	FALSE	-0.074	0.006	FALSE	-0.031	0.186	FALSE
8639	AOC3	-0.304	-0.083	FALSE	-0.251	-0.146	FALSE	-0.194	-0.146	FALSE	-0.133	-0.185	FALSE	-0.066	-0.242	FALSE
316	AOX1	-0.31	0.196	FALSE	-0.228	0.211	FALSE	-0.149	0.234	FALSE	-0.07	0.328	FALSE	-0.021	0.541	FALSE
55435	AP1AR	-0.651	-0.141	TRUE	-0.564	-0.201	TRUE	-0.472	-0.191	TRUE	-0.391	-0.109	TRUE	-0.28	0.246	TRUE
162	AP1B1	-0.539	-0.06	FALSE	-0.411	-0.089	FALSE	-0.341	-0.071	FALSE	-0.259	-0.127	FALSE	-0.155	-0.218	FALSE
164	AP1G1	-0.279	-0.02	FALSE	-0.208	-0.021	FALSE	-0.157	-0.085	FALSE	-0.125	-0.024	FALSE	-0.038	-0.04	FALSE
8906	AP1G2	-0.502	0.229	FALSE	-0.354	0.182	FALSE	-0.306	0.202	FALSE	-0.235	0.211	FALSE	-0.136	0.184	FALSE
8907	AP1M1	-0.331	0.076	FALSE	-0.209	0.102	FALSE	-0.168	0.118	FALSE	-0.126	0.16	FALSE	-0.038	0.215	FALSE
10053	AP1M2	-0.624	0.086	TRUE	-0.353	-0.074	TRUE	-0.265	-0.16	TRUE	-0.212	-0.198	TRUE	-0.071	-0.671	TRUE
1174	AP1S1	-0.515	0.197	FALSE	-0.484	0.332	FALSE	-0.396	0.393	FALSE	-0.314	0.506	FALSE	-0.169	0.686	FALSE
8905	AP1S2	-0.506	0.276	FALSE	-0.394	0.341	FALSE	-0.311	0.39	FALSE	-0.231	0.498	FALSE	-0.092	0.615	FALSE
130340	AP1S3	-0.105	0.38	FALSE	-0.073	0.493	FALSE	-0.061	0.63	FALSE	-0.042	0.797	FALSE	-0.005	1.425	FALSE
160	AP2A1	-0.468	0.034	FALSE	-0.381	0.022	FALSE	-0.293	0.085	FALSE	-0.19	0.109	FALSE	-0.084	0.116	FALSE
161	AP2A2	-0.36	0.497	FALSE	-0.289	0.427	FALSE	-0.186	0.482	FALSE	-0.121	0.594	FALSE	-0.009	0.827	FALSE
163	AP2B1	-0.498	0.323	FALSE	-0.388	0.31	FALSE	-0.218	0.266	FALSE	-0.157	0.298	FALSE	-0.032	0.351	FALSE
1173	AP2M1	-1.752	0.221	TRUE	-1.605	0.303	TRUE	-1.435	0.231	TRUE	-1.191	0.204	TRUE	-0.999	0.227	TRUE
1175	AP2S1	-1.087	0.135	TRUE	-0.982	0.201	TRUE	-0.829	0.199	TRUE	-0.737	0.24	TRUE	-0.549	0.381	TRUE
8546	AP3B1	-0.444	0.271	FALSE	-0.413	0.332	FALSE	-0.314	0.363	FALSE	-0.24	0.456	FALSE	-0.103	0.507	FALSE
8943	AP3D1	-0.314	0.059	FALSE	-0.226	0.049	FALSE	-0.165	0.077	FALSE	-0.104	0.15	FALSE	-0.032	0.103	FALSE
26985	AP3M1	-0.378	0.055	FALSE	-0.289	0.074	FALSE	-0.222	0.03	FALSE	-0.154	0.112	FALSE	-0.052	0.077	FALSE
10947	AP3M2	-0.461	0.045	FALSE	-0.334	-0.05	FALSE	-0.262	-0.082	FALSE	-0.2	-0.123	FALSE	-0.124	-0.064	FALSE
1176	AP3S1	-0.356	0.003	FALSE	-0.255	0.019	FALSE	-0.195	0.019	FALSE	-0.144	0.069	FALSE	-0.064	0.105	FALSE
10239	AP3S2	-0.241	0.173	FALSE	-0.177	0.285	FALSE	-0.137	0.426	FALSE	-0.073	0.552	FALSE	-0.027	0.939	FALSE
10717	AP4B1	-0.243	-0.08	FALSE	-0.154	-0.065	FALSE	-0.096	-0.092	FALSE	-0.037	-0.179	FALSE	-0.025	-0.261	FALSE
23431	AP4E1	-0.284	-0.065	FALSE	-0.197	-0.108	FALSE	-0.115	-0.147	FALSE	-0.066	-0.199	FALSE	-0.029	-0.438	FALSE
9179	AP4M1	-0.468	0.129	FALSE	-0.421	0.153	FALSE	-0.361	0.129	FALSE	-0.306	0.104	FALSE	-0.188	-0.061	FALSE
11154	AP4S1	-0.353	0.123	FALSE	-0.28	0.216	FALSE	-0.204	0.22	FALSE	-0.114	0.261	FALSE	-0.048	0.387	FALSE
55745	AP5M1	-0.288	0.121	FALSE	-0.197	0.149	FALSE	-0.122	0.115	FALSE	-0.066	0.183	FALSE	0.007	0.418	FALSE
317	APAF1	-0.345	0.08	FALSE	-0.265	0.15	FALSE	-0.2	0.124	FALSE	-0.156	0.209	FALSE	-0.068	0.355	FALSE
320	APBA1	-0.53	0.127	FALSE	-0.435	0.063	FALSE	-0.373	-0.046	FALSE	-0.311	-0.021	FALSE	-0.202	-0.034	FALSE
321	APBA2	-0.461	0.136	FALSE	-0.38	0.182	FALSE	-0.275	0.132	FALSE	-0.201	0.172	FALSE	-0.1	0.01	FALSE
9546	APBA3	-0.272	-0.222	FALSE	-0.231	-0.232	FALSE	-0.158	-0.338	FALSE	-0.103	-0.445	FALSE	-0.024	-0.905	FALSE
322	APBB1	-0.402	0.241	FALSE	-0.33	0.338	FALSE	-0.225	0.336	FALSE	-0.152	0.47	FALSE	-0.033	0.753	FALSE
54518	APBB1IP	-0.199	-0.115	FALSE	-0.139	-0.105	FALSE	-0.106	-0.039	FALSE	-0.058	-0.035	FALSE	-0.022	0.14	FALSE
323	APBB2	-0.407	-0.138	FALSE	-0.344	-0.164	FALSE	-0.291	-0.186	FALSE	-0.248	-0.161	FALSE	-0.141	-0.286	FALSE
10307	APBB3	-0.342	0.129	FALSE	-0.228	0.142	FALSE	-0.172	0.183	FALSE	-0.081	0.164	FALSE	-0.027	0.213	FALSE
324	APC	-0.637	0.258	TRUE	-0.502	0.314	TRUE	-0.304	0.347	TRUE	-0.207	0.371	TRUE	-0.099	0.454	TRUE
10297	APC2	-0.542	-0.09	FALSE	-0.466	-0.06	FALSE	-0.388	-0.065	FALSE	-0.341	-0.039	FALSE	-0.22	0.011	FALSE
147495	APCDD1	-0.3	0.139	FALSE	-0.229	0.067	FALSE	-0.185	0.008	FALSE	-0.118	0.049	FALSE	-0.022	-0.598	FALSE
164284	APCDD1L	-0.523	-0.032	FALSE	-0.362	-0.091	FALSE	-0.264	-0.173	FALSE	-0.159	-0.29	FALSE	-0.065	-0.64	FALSE
325	APCS	-0.222	0.056	FALSE	-0.145	0.117	FALSE	-0.074	0.118	FALSE	-0.048	0.199	FALSE	-0.03	0.185	FALSE
327	APEH	-0.27	0.161	FALSE	-0.179	0.247	FALSE	-0.134	0.292	FALSE	-0.064	0.265	FALSE	-0.028	0.629	FALSE
328	APEX1	-0.358	0.068	FALSE	-0.313	0.109	FALSE	-0.252	0.097	FALSE	-0.205	0.113	FALSE	-0.108	0.046	FALSE
27301	APEX2	-0.447	-0.112	FALSE	-0.359	-0.096	FALSE	-0.278	-0.074	FALSE	-0.201	-0.122	FALSE	-0.111	-0.242	FALSE
51107	APH1A	-0.422	-0.177	FALSE	-0.321	-0.236	FALSE	-0.246	-0.254	FALSE	-0.182	-0.28	FALSE	-0.109	-0.394	FALSE
83464	APH1B	-0.352	0.058	FALSE	-0.266	-0.006	FALSE	-0.203	-0.009	FALSE	-0.152	-0.037	FALSE	-0.059	-0.152	FALSE
8539	API5	-0.426	0.053	FALSE	-0.325	0.08	FALSE	-0.25	0.075	FALSE	-0.178	0.087	FALSE	-0.085	0.082	FALSE
51074	APIP	-0.273	-0.01	FALSE	-0.171	-0.029	FALSE	-0.123	-0.059	FALSE	-0.046	-0.155	FALSE	-0.025	-0.213	FALSE
200558	APLF	-0.376	0.033	FALSE	-0.251	0.016	FALSE	-0.154	0.014	FALSE	-0.083	0.001	FALSE	-0.024	-0.328	FALSE
8862	APLN	-0.28	-0.172	FALSE	-0.223	-0.199	FALSE	-0.171	-0.242	FALSE	-0.111	-0.329	FALSE	-0.022	-0.887	FALSE
187	APLNR	-0.291	0.011	FALSE	-0.21	0.049	FALSE	-0.141	0.016	FALSE	-0.084	0.08	FALSE	-0.007	0.136	FALSE
333	APLP1	-0.456	0.368	FALSE	-0.341	0.433	FALSE	-0.256	0.46	FALSE	-0.154	0.41	FALSE	-0.042	0.435	FALSE
334	APLP2	-0.481	0.149	FALSE	-0.404	0.021	FALSE	-0.337	0.059	FALSE	-0.27	0.107	FALSE	-0.159	0.151	FALSE
57136	APMAP	-0.399	-0.181	FALSE	-0.329	-0.198	FALSE	-0.257	-0.23	FALSE	-0.191	-0.273	FALSE	-0.092	-0.538	FALSE
335	APOA1	-0.384	0.075	FALSE	-0.312	0.145	FALSE	-0.259	0.16	FALSE	-0.189	0.213	FALSE	-0.08	0.056	FALSE
336	APOA2	-0.608	0.265	TRUE	-0.425	0.272	TRUE	-0.36	0.295	TRUE	-0.302	0.391	TRUE	-0.165	0.458	TRUE
337	APOA4	-0.311	0.327	FALSE	-0.251	0.254	FALSE	-0.162	0.19	FALSE	-0.095	0.21	FALSE	-0.023	0.257	FALSE
116519	APOA5	-0.417	0.108	FALSE	-0.361	0.01	FALSE	-0.328	0.055	FALSE	-0.254	0.101	FALSE	-0.111	-0.065	FALSE
338	APOB	-0.406	0.058	FALSE	-0.309	-0.009	FALSE	-0.235	-0.031	FALSE	-0.158	-0.009	FALSE	-0.067	-0.043	FALSE
339	APOBEC1	-0.436	-0.169	FALSE	-0.389	-0.134	FALSE	-0.336	-0.159	FALSE	-0.285	-0.162	FALSE	-0.179	-0.14	FALSE
10930	APOBEC2	-0.299	0.099	FALSE	-0.23	0.122	FALSE	-0.167	0.08	FALSE	-0.117	0.079	FALSE	-0.031	0.124	FALSE
200315	APOBEC3A	-0.424	-0.091	FALSE	-0.365	-0.067	FALSE	-0.296	-0.088	FALSE	-0.247	-0.119	FALSE	-0.14	-0.284	FALSE
9582	APOBEC3B	-0.398	-0.188	FALSE	-0.32	-0.289	FALSE	-0.25	-0.404	FALSE	-0.173	-0.527	FALSE	-0.098	-0.531	FALSE
27350	APOBEC3C	-0.311	-0.02	FALSE	-0.264	-0.012	FALSE	-0.177	-0.071	FALSE	-0.126	-0.009	FALSE	-0.04	-0.156	FALSE
140564	APOBEC3D	-0.23	-0.224	FALSE	-0.205	-0.179	FALSE	-0.145	-0.239	FALSE	-0.084	-0.379	FALSE	-0.044	-0.626	FALSE
200316	APOBEC3F	-0.66	-0.022	TRUE	-0.528	0.008	TRUE	-0.465	0.02	TRUE	-0.35	-0.029	TRUE	-0.229	0.073	TRUE
60489	APOBEC3G	-0.43	-0.053	FALSE	-0.349	-0.019	FALSE	-0.303	-0.068	FALSE	-0.24	-0.096	FALSE	-0.161	-0.216	FALSE
164668	APOBEC3H	-0.175	0.305	FALSE	-0.102	0.328	FALSE	-0.036	0.339	FALSE	-0.026	0.443	FALSE	-0.02	1.082	FALSE
403314	APOBEC4	-0.199	-0.076	FALSE	-0.187	-0.075	FALSE	-0.124	-0.133	FALSE	-0.043	-0.228	FALSE	-0.022	-0.466	FALSE
55911	APOBR	-0.466	0.065	FALSE	-0.382	0.083	FALSE	-0.293	0.063	FALSE	-0.191	0.017	FALSE	-0.092	-0.146	FALSE
341	APOC1	-0.217	-0.158	FALSE	-0.204	-0.129	FALSE	-0.17	-0.139	FALSE	-0.112	-0.187	FALSE	-0.068	-0.517	FALSE
344	APOC2	-0.294	0.013	FALSE	-0.24	-0.014	FALSE	-0.176	-0.006	FALSE	-0.115	-0.062	FALSE	-0.032	-0.109	FALSE
345	APOC3	-0.361	0.068	FALSE	-0.278	-0.032	FALSE	-0.219	0.011	FALSE	-0.159	-0.042	FALSE	-0.08	-0.062	FALSE
346	APOC4	-0.21	0.068	FALSE	-0.156	0.074	FALSE	-0.125	-0.031	FALSE	-0.058	-0.116	FALSE	-0.024	-0.592	FALSE
347	APOD	-0.478	-0.003	FALSE	-0.427	0.077	FALSE	-0.344	0.079	FALSE	-0.25	0.114	FALSE	-0.144	0.193	FALSE
348	APOE	-0.498	0.056	FALSE	-0.444	0.023	FALSE	-0.373	-0.049	FALSE	-0.295	-0.081	FALSE	-0.188	-0.096	FALSE
319	APOF	-0.321	0.537	FALSE	-0.225	0.522	FALSE	-0.134	0.43	FALSE	-0.049	0.397	FALSE	-0.029	0.637	FALSE
350	APOH	-0.366	0.058	FALSE	-0.245	0.046	FALSE	-0.175	0.052	FALSE	-0.103	0.076	FALSE	0.001	0.116	FALSE
8542	APOL1	-0.84	-0.051	TRUE	-0.589	-0.175	TRUE	-0.445	-0.221	TRUE	-0.385	-0.123	TRUE	-0.21	-0.006	TRUE
23780	APOL2	-0.99	-0.101	TRUE	-0.871	-0.025	TRUE	-0.78	0.064	TRUE	-0.72	0.247	TRUE	-0.585	0.293	TRUE
80833	APOL3	-0.18	0.041	FALSE	-0.104	0.049	FALSE	-0.067	0.141	FALSE	-0.026	0.099	FALSE	-0.022	0.279	FALSE
80831	APOL5	-0.289	-0.294	FALSE	-0.25	-0.293	FALSE	-0.182	-0.354	FALSE	-0.137	-0.414	FALSE	-0.037	-0.893	FALSE
80830	APOL6	-0.355	-0.087	FALSE	-0.291	-0.102	FALSE	-0.248	-0.109	FALSE	-0.176	-0.283	FALSE	-0.047	-0.79	FALSE
81575	APOLD1	-0.26	-0.085	FALSE	-0.203	-0.039	FALSE	-0.174	-0.029	FALSE	-0.101	-0.068	FALSE	-0.042	-0.047	FALSE
55937	APOM	-0.509	0.338	FALSE	-0.345	0.297	FALSE	-0.283	0.221	FALSE	-0.215	0.186	FALSE	-0.091	-0.146	FALSE
79135	APOO	-0.384	0.06	FALSE	-0.289	0.126	FALSE	-0.202	0.05	FALSE	-0.136	0.09	FALSE	-0.058	-0.032	FALSE
139322	APOOL	-0.504	-0.107	FALSE	-0.359	-0.145	FALSE	-0.236	-0.255	FALSE	-0.194	-0.255	FALSE	-0.119	-0.391	FALSE
84334	COA8	-0.115	-0.176	FALSE	-0.071	-0.234	FALSE	-0.053	-0.193	FALSE	-0.036	-0.208	FALSE	-0.027	-0.105	FALSE
351	APP	-0.418	0.101	FALSE	-0.377	0.091	FALSE	-0.312	0.063	FALSE	-0.231	0.021	FALSE	-0.09	-0.276	FALSE
10513	APPBP2	-0.397	0.242	FALSE	-0.296	0.256	FALSE	-0.214	0.263	FALSE	-0.147	0.243	FALSE	-0.055	0.256	FALSE
26060	APPL1	-0.463	-0.13	FALSE	-0.384	-0.092	FALSE	-0.334	-0.132	FALSE	-0.276	-0.144	FALSE	-0.177	-0.129	FALSE
55198	APPL2	-0.224	-0.233	FALSE	-0.154	-0.315	FALSE	-0.109	-0.354	FALSE	-0.072	-0.41	FALSE	-0.022	-0.756	FALSE
353	APRT	-0.645	0.274	TRUE	-0.501	0.165	TRUE	-0.414	0.181	TRUE	-0.366	0.249	TRUE	-0.245	0.183	TRUE
54840	APTX	-0.441	-0.085	FALSE	-0.303	-0.088	FALSE	-0.233	-0.072	FALSE	-0.188	-0.1	FALSE	-0.101	-0.087	FALSE
358	AQP1	-0.345	0.015	FALSE	-0.249	-0.029	FALSE	-0.186	-0.007	FALSE	-0.128	-0.062	FALSE	-0.036	-0.158	FALSE
89872	AQP10	-0.173	0.231	FALSE	-0.112	0.104	FALSE	-0.069	0.166	FALSE	-0.047	0.229	FALSE	-0.025	0.603	FALSE
282679	AQP11	-0.368	-0.17	FALSE	-0.251	-0.247	FALSE	-0.184	-0.288	FALSE	-0.14	-0.262	FALSE	-0.083	-0.197	FALSE
653437	AQP12B	-0.162	0.378	FALSE	-0.113	0.53	FALSE	-0.091	0.566	FALSE	-0.057	0.832	FALSE	-0.026	1.478	FALSE
359	AQP2	-0.364	-0.076	FALSE	-0.322	-0.01	FALSE	-0.261	-0.055	FALSE	-0.2	-0.072	FALSE	-0.108	-0.206	FALSE
360	AQP3	-0.354	0.001	FALSE	-0.259	0.008	FALSE	-0.204	0.001	FALSE	-0.146	0.01	FALSE	-0.039	-0.201	FALSE
361	AQP4	-0.401	-0.002	FALSE	-0.314	-0.023	FALSE	-0.256	-0.031	FALSE	-0.209	0.02	FALSE	-0.121	-0.011	FALSE
362	AQP5	-0.253	0.221	FALSE	-0.163	0.165	FALSE	-0.113	0.114	FALSE	-0.054	0.168	FALSE	-0.025	0.512	FALSE
363	AQP6	-0.373	0.023	FALSE	-0.286	0.007	FALSE	-0.22	-0.021	FALSE	-0.162	-0.025	FALSE	-0.081	-0.069	FALSE
364	AQP7	-0.492	0.008	FALSE	-0.441	0.052	FALSE	-0.404	0.101	FALSE	-0.362	0.151	FALSE	-0.266	0.186	FALSE
343	AQP8	-0.29	-0.029	FALSE	-0.247	-0.014	FALSE	-0.208	0.016	FALSE	-0.147	0.005	FALSE	-0.06	-0.103	FALSE
366	AQP9	-0.217	-0.164	FALSE	-0.164	-0.17	FALSE	-0.134	-0.202	FALSE	-0.075	-0.314	FALSE	-0.038	-0.652	FALSE
9716	AQR	-1.41	-0.088	TRUE	-1.203	-0.062	TRUE	-1.133	-0.022	TRUE	-1.073	0.073	TRUE	-0.963	-0.221	TRUE
367	AR	-0.474	0.034	FALSE	-0.382	0.041	FALSE	-0.308	-0.004	FALSE	-0.203	-0.07	FALSE	-0.106	-0.163	FALSE
369	ARAF	-0.424	0.076	FALSE	-0.325	0.051	FALSE	-0.222	0.046	FALSE	-0.154	0.034	FALSE	-0.076	0.167	FALSE
116985	ARAP1	-0.26	0.011	FALSE	-0.215	-0.02	FALSE	-0.17	-0.004	FALSE	-0.114	0.014	FALSE	-0.03	0.061	FALSE
116984	ARAP2	-0.463	-0.072	FALSE	-0.368	-0.092	FALSE	-0.322	-0.04	FALSE	-0.248	-0.013	FALSE	-0.128	-0.241	FALSE
64411	ARAP3	-0.466	-0.161	FALSE	-0.392	-0.15	FALSE	-0.323	-0.141	FALSE	-0.253	-0.165	FALSE	-0.163	-0.166	FALSE
23237	ARC	-0.223	-0.259	FALSE	-0.164	-0.274	FALSE	-0.113	-0.325	FALSE	-0.064	-0.405	FALSE	-0.023	-0.689	FALSE
372	ARCN1	-2.04	0.049	TRUE	-1.841	0.118	TRUE	-1.709	0.183	TRUE	-1.586	0.294	TRUE	-1.415	-0.237	TRUE
374	AREG	-0.252	-0.11	FALSE	-0.208	-0.083	FALSE	-0.144	-0.1	FALSE	-0.068	-0.103	FALSE	-0.024	-0.393	FALSE
9870	AREL1	-0.722	0.04	TRUE	-0.602	0.079	TRUE	-0.523	0.107	TRUE	-0.456	0.095	TRUE	-0.337	0.132	TRUE
375	ARF1	-0.731	-0.014	TRUE	-0.651	0.014	TRUE	-0.544	-0.02	TRUE	-0.442	-0.026	TRUE	-0.301	-0.042	TRUE
377	ARF3	-0.436	0.074	FALSE	-0.335	0.068	FALSE	-0.29	0.065	FALSE	-0.214	0.046	FALSE	-0.125	0.131	FALSE
378	ARF4	-1.287	0.351	TRUE	-1.041	0.442	TRUE	-0.786	0.516	TRUE	-0.545	0.626	TRUE	-0.273	0.906	TRUE
381	ARF5	-0.344	-0.009	FALSE	-0.302	-0.014	FALSE	-0.251	-0.021	FALSE	-0.182	-0.018	FALSE	-0.1	0.04	FALSE
382	ARF6	-0.398	0.054	FALSE	-0.282	0.074	FALSE	-0.22	0.122	FALSE	-0.162	0.221	FALSE	-0.066	0.175	FALSE
55738	ARFGAP1	-0.603	0.047	TRUE	-0.568	0.107	TRUE	-0.45	0.08	TRUE	-0.379	0.091	TRUE	-0.263	0.171	TRUE
84364	ARFGAP2	-0.443	-0.091	FALSE	-0.344	-0.082	FALSE	-0.289	-0.042	FALSE	-0.217	-0.104	FALSE	-0.079	-0.614	FALSE
26286	ARFGAP3	-0.496	0.01	FALSE	-0.448	0.087	FALSE	-0.332	0.105	FALSE	-0.25	0.134	FALSE	-0.148	0.276	FALSE
10565	ARFGEF1	-0.418	0.2	FALSE	-0.336	0.197	FALSE	-0.243	0.156	FALSE	-0.199	0.217	FALSE	-0.07	0.097	FALSE
57221	ARFGEF3	-0.257	-0.087	FALSE	-0.19	-0.038	FALSE	-0.09	-0.153	FALSE	-0.031	-0.23	FALSE	-0.024	-0.396	FALSE
27236	ARFIP1	-0.792	0.147	TRUE	-0.565	0.093	TRUE	-0.478	0.103	TRUE	-0.418	0.087	TRUE	-0.285	0.258	TRUE
23647	ARFIP2	-0.431	0.092	FALSE	-0.317	0.063	FALSE	-0.252	0.08	FALSE	-0.187	0.121	FALSE	-0.073	-0.073	FALSE
10139	ARFRP1	-0.686	0.064	TRUE	-0.589	0.037	TRUE	-0.508	0.063	TRUE	-0.396	0.023	TRUE	-0.281	0.009	TRUE
383	ARG1	-0.416	-0.138	FALSE	-0.348	-0.138	FALSE	-0.305	-0.166	FALSE	-0.247	-0.154	FALSE	-0.147	-0.22	FALSE
384	ARG2	-0.362	-0.112	FALSE	-0.297	-0.105	FALSE	-0.231	-0.162	FALSE	-0.173	-0.163	FALSE	-0.109	-0.069	FALSE
503582	ARGFX	-0.302	0.123	FALSE	-0.27	0.189	FALSE	-0.245	0.255	FALSE	-0.219	0.348	FALSE	-0.177	0.795	FALSE
55082	ARGLU1	-0.744	0.013	TRUE	-0.677	-0.011	TRUE	-0.603	-0.067	TRUE	-0.493	-0.148	TRUE	-0.352	-0.307	TRUE
392	ARHGAP1	-0.365	0.226	FALSE	-0.238	0.075	FALSE	-0.177	0.067	FALSE	-0.127	0.068	FALSE	-0.039	0.049	FALSE
79658	ARHGAP10	-0.64	0.113	TRUE	-0.539	0.135	TRUE	-0.491	0.127	TRUE	-0.421	0.175	TRUE	-0.282	0.173	TRUE
9824	ARHGAP11A	-0.337	-0.116	FALSE	-0.288	-0.151	FALSE	-0.264	-0.109	FALSE	-0.213	-0.089	FALSE	-0.115	-0.07	FALSE
89839	ARHGAP11B	-0.31	-0.162	FALSE	-0.242	-0.178	FALSE	-0.192	-0.219	FALSE	-0.15	-0.223	FALSE	-0.088	-0.381	FALSE
94134	ARHGAP12	-0.507	0.026	FALSE	-0.409	0.07	FALSE	-0.277	0.01	FALSE	-0.201	0.026	FALSE	-0.112	-0.01	FALSE
55843	ARHGAP15	-0.233	0.285	FALSE	-0.182	0.237	FALSE	-0.132	0.271	FALSE	-0.063	0.407	FALSE	0.02	0.595	FALSE
55114	ARHGAP17	-0.36	-0.11	FALSE	-0.332	-0.076	FALSE	-0.282	-0.05	FALSE	-0.241	-0.009	FALSE	-0.136	-0.061	FALSE
93663	ARHGAP18	-0.489	0.029	FALSE	-0.424	0.061	FALSE	-0.344	0.036	FALSE	-0.273	0.013	FALSE	-0.173	0.067	FALSE
84986	ARHGAP19	-0.66	0.077	TRUE	-0.516	0.072	TRUE	-0.45	0.091	TRUE	-0.366	0.027	TRUE	-0.249	0.058	TRUE
57569	ARHGAP20	-0.235	-0.219	FALSE	-0.193	-0.185	FALSE	-0.153	-0.161	FALSE	-0.1	-0.144	FALSE	-0.025	-0.139	FALSE
57584	ARHGAP21	-0.425	-0.076	FALSE	-0.352	0	FALSE	-0.293	0.026	FALSE	-0.234	0.053	FALSE	-0.156	0.032	FALSE
58504	ARHGAP22	-0.582	0.164	TRUE	-0.511	0.195	TRUE	-0.436	0.134	TRUE	-0.33	0.156	TRUE	-0.209	0.18	TRUE
57636	ARHGAP23	-0.272	-0.141	FALSE	-0.224	-0.119	FALSE	-0.183	-0.1	FALSE	-0.14	-0.033	FALSE	-0.071	-0.015	FALSE
83478	ARHGAP24	-0.336	-0.034	FALSE	-0.268	-0.147	FALSE	-0.235	-0.174	FALSE	-0.188	-0.21	FALSE	-0.119	-0.257	FALSE
9938	ARHGAP25	-0.484	0.052	FALSE	-0.399	0.105	FALSE	-0.293	0.116	FALSE	-0.207	0.109	FALSE	-0.101	0.116	FALSE
23092	ARHGAP26	-0.328	-0.147	FALSE	-0.276	-0.124	FALSE	-0.23	-0.045	FALSE	-0.149	-0.04	FALSE	-0.076	0.033	FALSE
201176	ARHGAP27	-0.613	0.219	TRUE	-0.482	0.278	TRUE	-0.393	0.32	TRUE	-0.249	0.354	TRUE	-0.121	0.446	TRUE
79822	ARHGAP28	-0.535	-0.012	FALSE	-0.488	0.034	FALSE	-0.371	-0.044	FALSE	-0.307	0.029	FALSE	-0.185	-0.066	FALSE
9411	ARHGAP29	-0.778	0.051	TRUE	-0.568	-0.018	TRUE	-0.433	-0.064	TRUE	-0.343	-0.064	TRUE	-0.242	0.034	TRUE
257106	ARHGAP30	-0.41	-0.218	FALSE	-0.317	-0.207	FALSE	-0.238	-0.279	FALSE	-0.167	-0.36	FALSE	-0.079	-0.609	FALSE
57514	ARHGAP31	-0.458	0.051	FALSE	-0.391	0.054	FALSE	-0.334	0.063	FALSE	-0.276	0.023	FALSE	-0.17	0.071	FALSE
9743	ARHGAP32	-0.525	0.292	FALSE	-0.45	0.312	FALSE	-0.353	0.354	FALSE	-0.262	0.402	FALSE	-0.15	0.599	FALSE
115703	ARHGAP33	-0.336	0.079	FALSE	-0.304	0.07	FALSE	-0.234	0.043	FALSE	-0.17	0.068	FALSE	-0.065	0.013	FALSE
2909	ARHGAP35	-0.551	0.126	TRUE	-0.451	0.064	TRUE	-0.357	-0.001	TRUE	-0.299	0.008	TRUE	-0.2	-0.021	TRUE
158763	ARHGAP36	-0.634	0.017	TRUE	-0.494	-0.004	TRUE	-0.426	0.068	TRUE	-0.318	0.02	TRUE	-0.213	0.065	TRUE
80728	ARHGAP39	-0.412	-0.146	FALSE	-0.34	-0.102	FALSE	-0.279	-0.114	FALSE	-0.223	-0.12	FALSE	-0.147	-0.039	FALSE
393	ARHGAP4	-0.671	0.203	TRUE	-0.557	0.203	TRUE	-0.486	0.253	TRUE	-0.405	0.342	TRUE	-0.245	0.325	TRUE
9912	ARHGAP44	-0.275	0.022	FALSE	-0.231	0.085	FALSE	-0.171	0.107	FALSE	-0.108	0.126	FALSE	-0.018	0.059	FALSE
23526	ARHGAP45	-0.549	-0.002	TRUE	-0.454	0.005	TRUE	-0.405	0.048	TRUE	-0.33	0.021	TRUE	-0.223	0.05	TRUE
394	ARHGAP5	-0.608	0.043	TRUE	-0.455	-0.032	TRUE	-0.35	-0.08	TRUE	-0.29	-0.112	TRUE	-0.191	-0.078	TRUE
395	ARHGAP6	-0.418	0.055	FALSE	-0.332	0.069	FALSE	-0.231	0.087	FALSE	-0.157	0.087	FALSE	-0.05	0.16	FALSE
23779	ARHGAP8	-0.433	0.289	FALSE	-0.363	0.367	FALSE	-0.29	0.414	FALSE	-0.212	0.443	FALSE	-0.078	0.506	FALSE
64333	ARHGAP9	-0.846	0.13	TRUE	-0.678	0.14	TRUE	-0.561	0.108	TRUE	-0.445	0.095	TRUE	-0.274	0.082	TRUE
396	ARHGDIA	-0.273	0.067	FALSE	-0.234	0.162	FALSE	-0.183	0.177	FALSE	-0.112	0.271	FALSE	-0.034	0.349	FALSE
397	ARHGDIB	-0.348	-0.039	FALSE	-0.277	-0.005	FALSE	-0.181	-0.036	FALSE	-0.121	-0.034	FALSE	-0.036	-0.23	FALSE
398	ARHGDIG	-0.635	0.145	TRUE	-0.578	0.215	TRUE	-0.486	0.2	TRUE	-0.393	0.264	TRUE	-0.224	0.063	TRUE
9138	ARHGEF1	-0.251	0.16	FALSE	-0.19	0.202	FALSE	-0.145	0.261	FALSE	-0.061	0.244	FALSE	0.03	0.385	FALSE
9639	ARHGEF10	-0.361	0.194	FALSE	-0.214	0.114	FALSE	-0.166	0.131	FALSE	-0.121	0.212	FALSE	-0.035	0.313	FALSE
55160	ARHGEF10L	-0.415	-0.037	FALSE	-0.335	0.011	FALSE	-0.283	0.027	FALSE	-0.185	-0.006	FALSE	-0.098	-0.099	FALSE
9826	ARHGEF11	-0.302	-0.011	FALSE	-0.208	-0.04	FALSE	-0.155	-0.008	FALSE	-0.098	-0.037	FALSE	-0.026	0.009	FALSE
23365	ARHGEF12	-0.338	0.03	FALSE	-0.255	0.079	FALSE	-0.186	0.09	FALSE	-0.132	0.138	FALSE	-0.034	0.194	FALSE
22899	ARHGEF15	-0.359	0.312	FALSE	-0.307	0.347	FALSE	-0.246	0.386	FALSE	-0.142	0.382	FALSE	-0.049	0.539	FALSE
27237	ARHGEF16	-0.314	-0.069	FALSE	-0.275	0.003	FALSE	-0.231	0.05	FALSE	-0.174	0.097	FALSE	-0.074	0.071	FALSE
23370	ARHGEF18	-0.453	0.144	FALSE	-0.389	0.192	FALSE	-0.284	0.226	FALSE	-0.217	0.235	FALSE	-0.122	0.396	FALSE
128272	ARHGEF19	-0.318	0.32	FALSE	-0.258	0.171	FALSE	-0.196	0.225	FALSE	-0.134	0.285	FALSE	-0.011	0.363	FALSE
9181	ARHGEF2	-0.627	-0.112	TRUE	-0.579	-0.062	TRUE	-0.533	-0.068	TRUE	-0.474	-0.027	TRUE	-0.367	0.012	TRUE
115557	ARHGEF25	-0.311	0.007	FALSE	-0.229	-0.068	FALSE	-0.18	-0.085	FALSE	-0.14	-0.019	FALSE	-0.052	0.017	FALSE
26084	ARHGEF26	-0.286	0.223	FALSE	-0.21	0.342	FALSE	-0.118	0.355	FALSE	-0.055	0.471	FALSE	0.044	0.642	FALSE
64283	ARHGEF28	-0.318	-0.102	FALSE	-0.269	-0.066	FALSE	-0.216	-0.095	FALSE	-0.161	-0.107	FALSE	-0.085	-0.134	FALSE
50650	ARHGEF3	-0.28	-0.024	FALSE	-0.246	-0.012	FALSE	-0.176	-0.012	FALSE	-0.119	0.007	FALSE	-0.047	0.092	FALSE
100271715	ARHGEF33	-0.614	-0.2	TRUE	-0.528	-0.153	TRUE	-0.465	-0.188	TRUE	-0.408	-0.104	TRUE	-0.293	0.093	TRUE
445328	ARHGEF35	-0.363	0.09	FALSE	-0.264	0.14	FALSE	-0.173	0.179	FALSE	-0.089	0.231	FALSE	-0.02	0.389	FALSE
389337	ARHGEF37	-0.278	-0.111	FALSE	-0.218	-0.084	FALSE	-0.172	-0.026	FALSE	-0.114	-0.024	FALSE	-0.034	-0.035	FALSE
54848	ARHGEF38	-0.294	-0.049	FALSE	-0.255	0.05	FALSE	-0.169	-0.009	FALSE	-0.091	-0.056	FALSE	-0.023	-0.297	FALSE
84904	ARHGEF39	-0.462	0.227	FALSE	-0.343	0.281	FALSE	-0.275	0.355	FALSE	-0.174	0.392	FALSE	-0.031	0.455	FALSE
50649	ARHGEF4	-0.425	-0.027	FALSE	-0.344	-0.023	FALSE	-0.267	-0.06	FALSE	-0.225	-0.001	FALSE	-0.13	0.07	FALSE
55701	ARHGEF40	-0.431	-0.079	FALSE	-0.368	-0.099	FALSE	-0.315	-0.096	FALSE	-0.225	-0.137	FALSE	-0.084	-0.594	FALSE
7984	ARHGEF5	-0.311	-0.141	FALSE	-0.272	-0.119	FALSE	-0.211	-0.127	FALSE	-0.139	-0.144	FALSE	-0.046	-0.165	FALSE
9459	ARHGEF6	-0.261	0.101	FALSE	-0.22	0.098	FALSE	-0.18	0.119	FALSE	-0.118	0.145	FALSE	-0.047	0.197	FALSE
8874	ARHGEF7	-0.447	-0.059	FALSE	-0.354	-0.026	FALSE	-0.284	-0.05	FALSE	-0.218	-0.05	FALSE	-0.12	0.012	FALSE
23229	ARHGEF9	-0.357	0.178	FALSE	-0.244	0.257	FALSE	-0.175	0.215	FALSE	-0.134	0.29	FALSE	-0.032	0.329	FALSE
8289	ARID1A	-0.737	0.521	TRUE	-0.635	0.505	TRUE	-0.554	0.488	TRUE	-0.436	0.49	TRUE	-0.261	0.694	TRUE
57492	ARID1B	-0.985	0.214	TRUE	-0.744	0.205	TRUE	-0.467	0.13	TRUE	-0.298	0.049	TRUE	-0.167	0.063	TRUE
196528	ARID2	-0.655	0.122	TRUE	-0.503	0.112	TRUE	-0.384	0.03	TRUE	-0.303	0.023	TRUE	-0.203	-0.033	TRUE
1820	ARID3A	-0.365	-0.054	FALSE	-0.297	-0.061	FALSE	-0.234	-0.111	FALSE	-0.173	-0.117	FALSE	-0.082	-0.133	FALSE
10620	ARID3B	-0.621	0.083	TRUE	-0.537	0.038	TRUE	-0.477	0.038	TRUE	-0.378	-0.01	TRUE	-0.271	0.117	TRUE
138715	ARID3C	-0.302	-0.081	FALSE	-0.245	-0.108	FALSE	-0.199	-0.175	FALSE	-0.124	-0.264	FALSE	-0.061	-0.29	FALSE
5926	ARID4A	-0.528	-0.057	FALSE	-0.408	-0.101	FALSE	-0.346	-0.059	FALSE	-0.271	-0.063	FALSE	-0.172	-0.113	FALSE
51742	ARID4B	-0.493	-0.039	FALSE	-0.415	-0.061	FALSE	-0.356	-0.075	FALSE	-0.288	-0.12	FALSE	-0.181	-0.133	FALSE
10865	ARID5A	-0.336	0.035	FALSE	-0.277	0.03	FALSE	-0.215	-0.058	FALSE	-0.149	-0.113	FALSE	-0.064	-0.146	FALSE
84159	ARID5B	-0.6	-0.115	TRUE	-0.491	-0.101	TRUE	-0.423	-0.159	TRUE	-0.329	-0.21	TRUE	-0.218	-0.07	TRUE
25820	ARIH1	-1.149	-0.019	TRUE	-1.065	0.04	TRUE	-0.907	0.042	TRUE	-0.755	-0.059	TRUE	-0.632	-0.141	TRUE
10425	ARIH2	-0.299	0.113	FALSE	-0.223	0.124	FALSE	-0.183	0.162	FALSE	-0.113	0.189	FALSE	-0.033	0.357	FALSE
400	ARL1	-0.309	0.099	FALSE	-0.239	0.139	FALSE	-0.13	0.165	FALSE	-0.076	0.146	FALSE	0.009	0.243	FALSE
285598	ARL10	-0.425	0.006	FALSE	-0.363	-0.064	FALSE	-0.295	-0.079	FALSE	-0.213	-0.118	FALSE	-0.116	-0.245	FALSE
115761	ARL11	-0.867	0.079	TRUE	-0.804	0.076	TRUE	-0.709	0.072	TRUE	-0.604	0.143	TRUE	-0.443	0.458	TRUE
392509	ARL13A	-0.3	-0.14	FALSE	-0.271	-0.137	FALSE	-0.228	-0.164	FALSE	-0.182	-0.129	FALSE	-0.09	-0.166	FALSE
200894	ARL13B	-0.475	0.179	FALSE	-0.363	0.192	FALSE	-0.262	0.172	FALSE	-0.185	0.236	FALSE	-0.1	0.412	FALSE
80117	ARL14	-0.355	0.09	FALSE	-0.263	0.034	FALSE	-0.193	0.089	FALSE	-0.128	0.163	FALSE	-0.024	0.263	FALSE
120534	ARL14EP	-0.401	-0.064	FALSE	-0.323	-0.099	FALSE	-0.267	-0.135	FALSE	-0.187	-0.285	FALSE	-0.048	-0.794	FALSE
54622	ARL15	-0.315	-0.068	FALSE	-0.249	-0.06	FALSE	-0.188	-0.077	FALSE	-0.147	0.023	FALSE	-0.061	0.021	FALSE
339231	ARL16	-0.416	-0.205	FALSE	-0.375	-0.158	FALSE	-0.293	-0.187	FALSE	-0.211	-0.262	FALSE	-0.101	-0.495	FALSE
51326	ARL17A	-0.369	-0.17	FALSE	-0.287	-0.186	FALSE	-0.232	-0.184	FALSE	-0.162	-0.294	FALSE	-0.093	-0.439	FALSE
402	ARL2	-0.457	0.008	FALSE	-0.355	-0.029	FALSE	-0.319	-0.005	FALSE	-0.224	-0.034	FALSE	-0.121	-0.061	FALSE
23568	ARL2BP	-0.533	-0.239	FALSE	-0.499	-0.274	FALSE	-0.416	-0.26	FALSE	-0.318	-0.233	FALSE	-0.205	-0.027	FALSE
403	ARL3	-0.206	-0.111	FALSE	-0.146	-0.081	FALSE	-0.096	-0.091	FALSE	-0.052	-0.088	FALSE	0.002	0.025	FALSE
10124	ARL4A	-0.357	0.073	FALSE	-0.227	0.085	FALSE	-0.162	0.049	FALSE	-0.098	0.104	FALSE	-0.017	0.082	FALSE
10123	ARL4C	-0.577	0.14	TRUE	-0.535	0.032	TRUE	-0.469	0.053	TRUE	-0.396	0.035	TRUE	-0.28	0.022	TRUE
379	ARL4D	-0.477	0.166	FALSE	-0.376	0.196	FALSE	-0.294	0.26	FALSE	-0.212	0.288	FALSE	-0.077	0.423	FALSE
26225	ARL5A	-0.396	-0.209	FALSE	-0.319	-0.213	FALSE	-0.255	-0.218	FALSE	-0.193	-0.237	FALSE	-0.112	-0.357	FALSE
221079	ARL5B	-0.781	0.128	TRUE	-0.673	0.081	TRUE	-0.595	0.085	TRUE	-0.467	0.078	TRUE	-0.345	0.105	TRUE
390790	ARL5C	-0.5	-0.148	FALSE	-0.385	-0.183	FALSE	-0.291	-0.23	FALSE	-0.227	-0.277	FALSE	-0.156	-0.256	FALSE
84100	ARL6	-0.424	-0.077	FALSE	-0.339	-0.031	FALSE	-0.275	-0.037	FALSE	-0.205	-0.034	FALSE	-0.105	-0.003	FALSE
23204	ARL6IP1	-0.168	-0.129	FALSE	-0.103	-0.171	FALSE	-0.036	-0.29	FALSE	-0.026	-0.253	FALSE	-0.023	-0.18	FALSE
51329	ARL6IP4	-0.701	-0.034	TRUE	-0.576	-0.02	TRUE	-0.526	-0.056	TRUE	-0.415	-0.084	TRUE	-0.245	0.104	TRUE
10550	ARL6IP5	-0.185	0.073	FALSE	-0.145	0.095	FALSE	-0.095	0.145	FALSE	-0.045	0.235	FALSE	-0.025	0.657	FALSE
127829	ARL8A	-0.4	0.176	FALSE	-0.318	0.153	FALSE	-0.25	0.16	FALSE	-0.176	0.121	FALSE	-0.081	0.037	FALSE
55207	ARL8B	-0.393	-0.081	FALSE	-0.319	-0.047	FALSE	-0.276	-0.026	FALSE	-0.219	-0.01	FALSE	-0.135	0.074	FALSE
132946	ARL9	-0.381	0.137	FALSE	-0.328	0.177	FALSE	-0.203	0.11	FALSE	-0.138	0.129	FALSE	-0.043	0.153	FALSE
55156	ARMC1	-0.629	0.136	TRUE	-0.394	0.1	TRUE	-0.293	0.011	TRUE	-0.216	0.007	TRUE	-0.125	-0.117	TRUE
83787	ARMC10	-0.418	0.049	FALSE	-0.344	0.048	FALSE	-0.257	0.026	FALSE	-0.168	-0.074	FALSE	-0.054	-0.774	FALSE
84071	ARMC2	-0.439	-0.037	FALSE	-0.367	-0.122	FALSE	-0.286	-0.188	FALSE	-0.224	-0.203	FALSE	-0.073	-0.654	FALSE
219681	ARMC3	-0.274	-0.102	FALSE	-0.197	-0.121	FALSE	-0.144	-0.088	FALSE	-0.077	-0.161	FALSE	-0.023	-0.235	FALSE
55130	ARMC4	-0.266	-0.228	FALSE	-0.208	-0.211	FALSE	-0.163	-0.258	FALSE	-0.111	-0.331	FALSE	-0.027	-0.868	FALSE
79798	ARMC5	-0.368	0.022	FALSE	-0.315	0.049	FALSE	-0.291	0.098	FALSE	-0.214	0.039	FALSE	-0.111	-0.352	FALSE
93436	ARMC6	-0.242	-0.146	FALSE	-0.203	-0.11	FALSE	-0.172	-0.104	FALSE	-0.128	-0.093	FALSE	-0.071	0.064	FALSE
79637	ARMC7	-0.536	0.075	FALSE	-0.498	0.061	FALSE	-0.46	0.112	FALSE	-0.398	0.155	FALSE	-0.169	0.035	FALSE
25852	ARMC8	-0.511	0.02	FALSE	-0.427	0.056	FALSE	-0.368	0.056	FALSE	-0.271	0.077	FALSE	-0.164	0.052	FALSE
51309	ARMCX1	-0.162	-0.027	FALSE	-0.064	-0.076	FALSE	-0.032	-0.014	FALSE	-0.024	0.012	FALSE	-0.022	0.164	FALSE
9823	ARMCX2	-0.502	-0.032	FALSE	-0.407	-0.006	FALSE	-0.327	-0.005	FALSE	-0.227	-0.026	FALSE	-0.061	-0.724	FALSE
51566	ARMCX3	-0.317	-0.383	FALSE	-0.288	-0.345	FALSE	-0.237	-0.33	FALSE	-0.179	-0.415	FALSE	-0.088	-0.567	FALSE
64860	ARMCX5	-0.233	-0.148	FALSE	-0.154	-0.208	FALSE	-0.11	-0.198	FALSE	-0.049	-0.362	FALSE	-0.025	-0.518	FALSE
54470	ARMCX6	-0.422	0.355	FALSE	-0.183	0.413	FALSE	-0.085	0.492	FALSE	-0.047	0.591	FALSE	-0.028	0.851	FALSE
339541	ARMH1	-0.571	0.014	TRUE	-0.459	-0.011	TRUE	-0.387	0.027	TRUE	-0.262	-0.037	TRUE	-0.142	-0.171	TRUE
79591	ARMH3	-0.674	-0.237	TRUE	-0.556	-0.236	TRUE	-0.489	-0.183	TRUE	-0.404	-0.105	TRUE	-0.28	0.193	TRUE
145407	ARMH4	-0.859	-0.163	TRUE	-0.712	-0.12	TRUE	-0.495	-0.172	TRUE	-0.037	-0.941	TRUE	-0.026	-0.974	TRUE
405	ARNT	-0.654	0.434	TRUE	-0.525	0.499	TRUE	-0.343	0.529	TRUE	-0.239	0.646	TRUE	-0.083	0.861	TRUE
9915	ARNT2	-0.444	0.046	FALSE	-0.387	0.111	FALSE	-0.301	0.124	FALSE	-0.235	0.154	FALSE	-0.135	0.171	FALSE
406	ARNTL	-0.392	-0.133	FALSE	-0.348	-0.12	FALSE	-0.284	-0.155	FALSE	-0.213	-0.17	FALSE	-0.132	-0.117	FALSE
56938	ARNTL2	-0.413	0.009	FALSE	-0.341	0.026	FALSE	-0.268	-0.007	FALSE	-0.184	-0.002	FALSE	-0.101	0.086	FALSE
10552	ARPC1A	-0.884	-0.003	TRUE	-0.813	0.067	TRUE	-0.691	-0.012	TRUE	-0.58	-0.082	TRUE	-0.478	-0.042	TRUE
10095	ARPC1B	-0.581	0.207	TRUE	-0.444	0.178	TRUE	-0.361	0.143	TRUE	-0.283	0.162	TRUE	-0.169	0.27	TRUE
10109	ARPC2	-0.722	-0.041	TRUE	-0.61	-0.058	TRUE	-0.547	-0.042	TRUE	-0.48	-0.02	TRUE	-0.329	0.025	TRUE
10094	ARPC3	-0.351	-0.008	FALSE	-0.321	0.019	FALSE	-0.296	0.061	FALSE	-0.261	0.15	FALSE	-0.177	0.214	FALSE
10093	ARPC4	-0.706	-0.043	TRUE	-0.577	-0.085	TRUE	-0.487	-0.104	TRUE	-0.401	-0.11	TRUE	-0.284	-0.087	TRUE
10092	ARPC5	-0.369	0.126	FALSE	-0.31	0.084	FALSE	-0.256	0.102	FALSE	-0.177	0.059	FALSE	-0.082	-0.1	FALSE
81873	ARPC5L	-0.304	-0.155	FALSE	-0.244	-0.171	FALSE	-0.177	-0.206	FALSE	-0.095	-0.36	FALSE	-0.03	-0.832	FALSE
348110	ARPIN	-0.206	0.233	FALSE	-0.126	0.284	FALSE	-0.077	0.281	FALSE	-0.026	0.378	FALSE	-0.022	0.175	FALSE
10776	ARPP19	-0.39	-0.136	FALSE	-0.278	-0.163	FALSE	-0.204	-0.22	FALSE	-0.153	-0.283	FALSE	-0.076	-0.664	FALSE
10777	ARPP21	-0.551	-0.074	TRUE	-0.387	-0.113	TRUE	-0.362	-0.073	TRUE	-0.274	-0.101	TRUE	-0.166	-0.17	TRUE
407	ARR3	-0.328	-0.085	FALSE	-0.28	-0.041	FALSE	-0.209	-0.076	FALSE	-0.138	-0.156	FALSE	-0.03	-0.751	FALSE
408	ARRB1	-0.283	0.016	FALSE	-0.206	-0.033	FALSE	-0.16	-0.126	FALSE	-0.11	-0.156	FALSE	-0.042	-0.22	FALSE
409	ARRB2	-0.305	-0.194	FALSE	-0.231	-0.223	FALSE	-0.163	-0.34	FALSE	-0.102	-0.458	FALSE	-0.029	-0.906	FALSE
92714	ARRDC1	-0.302	-0.16	FALSE	-0.252	-0.212	FALSE	-0.197	-0.282	FALSE	-0.144	-0.323	FALSE	-0.063	-0.732	FALSE
27106	ARRDC2	-0.427	-0.243	FALSE	-0.371	-0.201	FALSE	-0.306	-0.21	FALSE	-0.212	-0.328	FALSE	-0.086	-0.597	FALSE
91947	ARRDC4	-0.439	0.253	FALSE	-0.364	0.276	FALSE	-0.274	0.276	FALSE	-0.189	0.371	FALSE	-0.068	0.26	FALSE
410	ARSA	-0.392	-0.045	FALSE	-0.318	-0.069	FALSE	-0.236	-0.081	FALSE	-0.153	-0.125	FALSE	-0.082	-0.218	FALSE
411	ARSB	-0.244	0.226	FALSE	-0.172	0.212	FALSE	-0.127	0.303	FALSE	-0.082	0.345	FALSE	-0.038	0.631	FALSE
414	ARSD	-0.444	-0.012	FALSE	-0.34	0.003	FALSE	-0.274	0.026	FALSE	-0.195	-0.006	FALSE	-0.117	-0.116	FALSE
415	ARSE	-0.29	-0.126	FALSE	-0.24	-0.084	FALSE	-0.187	-0.037	FALSE	-0.085	-0.148	FALSE	-0.024	-0.195	FALSE
416	ARSF	-0.393	-0.003	FALSE	-0.299	0.037	FALSE	-0.229	-0.01	FALSE	-0.161	0.02	FALSE	-0.074	-0.145	FALSE
22901	ARSG	-0.493	-0.048	FALSE	-0.355	-0.036	FALSE	-0.314	0.017	FALSE	-0.265	0.088	FALSE	-0.169	0.168	FALSE
347527	ARSH	-0.165	-0.043	FALSE	-0.134	-0.09	FALSE	-0.097	-0.118	FALSE	-0.03	-0.216	FALSE	-0.022	-0.407	FALSE
340075	ARSI	-0.249	-0.018	FALSE	-0.184	-0.036	FALSE	-0.16	-0.046	FALSE	-0.095	-0.144	FALSE	-0.049	-0.395	FALSE
79642	ARSJ	-0.392	0.019	FALSE	-0.335	-0.008	FALSE	-0.281	0.002	FALSE	-0.197	0.018	FALSE	-0.074	-0.088	FALSE
153642	ARSK	-0.773	-0.212	TRUE	-0.714	-0.124	TRUE	-0.622	-0.059	TRUE	-0.547	0.077	TRUE	-0.371	0.473	TRUE
417	ART1	-0.361	0.397	FALSE	-0.251	0.401	FALSE	-0.171	0.469	FALSE	-0.089	0.469	FALSE	-0.026	0.678	FALSE
419	ART3	-0.303	0.085	FALSE	-0.265	0.163	FALSE	-0.187	0.175	FALSE	-0.128	0.128	FALSE	-0.026	0.125	FALSE
420	ART4	-0.265	0.174	FALSE	-0.177	0.109	FALSE	-0.134	0.146	FALSE	-0.072	0.204	FALSE	-0.024	0.351	FALSE
116969	ART5	-0.476	-0.026	FALSE	-0.404	-0.02	FALSE	-0.33	-0.086	FALSE	-0.266	-0.087	FALSE	-0.159	-0.206	FALSE
64801	ARV1	-0.295	0.116	FALSE	-0.192	0.087	FALSE	-0.152	0.128	FALSE	-0.114	0.174	FALSE	-0.044	0.287	FALSE
421	ARVCF	-0.482	0.057	FALSE	-0.421	0.052	FALSE	-0.356	0.062	FALSE	-0.268	0.037	FALSE	-0.138	-0.044	FALSE
170302	ARX	-0.356	-0.071	FALSE	-0.279	-0.087	FALSE	-0.233	-0.076	FALSE	-0.188	-0.048	FALSE	-0.113	-0.008	FALSE
57412	AS3MT	-0.292	0.123	FALSE	-0.211	0.165	FALSE	-0.139	0.271	FALSE	-0.052	0.24	FALSE	-0.023	0.454	FALSE
56624	ASAH2	-0.276	0.118	FALSE	-0.225	0.149	FALSE	-0.174	0.216	FALSE	-0.101	0.235	FALSE	-0.022	0.366	FALSE
50807	ASAP1	-0.443	-0.034	FALSE	-0.328	-0.061	FALSE	-0.243	-0.095	FALSE	-0.197	-0.079	FALSE	-0.093	-0.118	FALSE
8853	ASAP2	-0.391	0.107	FALSE	-0.281	0.03	FALSE	-0.227	0.026	FALSE	-0.159	0.018	FALSE	-0.055	0.094	FALSE
55616	ASAP3	-0.439	-0.01	FALSE	-0.344	-0.006	FALSE	-0.256	-0.043	FALSE	-0.202	-0.019	FALSE	-0.089	-0.081	FALSE
51665	ASB1	-0.541	-0.34	FALSE	-0.461	-0.308	FALSE	-0.386	-0.287	FALSE	-0.323	-0.214	FALSE	-0.223	0.055	FALSE
136371	ASB10	-0.556	-0.081	TRUE	-0.424	-0.108	TRUE	-0.398	-0.062	TRUE	-0.327	-0.075	TRUE	-0.208	-0.022	TRUE
140456	ASB11	-0.493	0.186	FALSE	-0.43	0.206	FALSE	-0.36	0.212	FALSE	-0.275	0.262	FALSE	-0.146	0.22	FALSE
142689	ASB12	-0.466	-0.216	FALSE	-0.413	-0.158	FALSE	-0.331	-0.168	FALSE	-0.273	-0.192	FALSE	-0.153	-0.238	FALSE
79754	ASB13	-0.439	-0.093	FALSE	-0.388	-0.04	FALSE	-0.324	-0.032	FALSE	-0.236	-0.068	FALSE	-0.15	-0.165	FALSE
142686	ASB14	-0.437	-0.119	FALSE	-0.356	-0.048	FALSE	-0.271	-0.08	FALSE	-0.227	-0.029	FALSE	-0.119	-0.172	FALSE
142685	ASB15	-0.595	-0.135	TRUE	-0.523	-0.142	TRUE	-0.447	-0.195	TRUE	-0.397	-0.089	TRUE	-0.285	0.062	TRUE
92591	ASB16	-0.424	-0.117	FALSE	-0.356	-0.114	FALSE	-0.311	-0.146	FALSE	-0.242	-0.244	FALSE	-0.16	-0.246	FALSE
127247	ASB17	-0.23	0.121	FALSE	-0.173	0.222	FALSE	-0.073	0.234	FALSE	-0.03	0.253	FALSE	-0.025	0.379	FALSE
401036	ASB18	-0.459	-0.073	FALSE	-0.333	-0.1	FALSE	-0.29	-0.087	FALSE	-0.214	-0.102	FALSE	-0.107	-0.252	FALSE
51130	ASB3	-0.215	0.287	FALSE	-0.156	0.338	FALSE	-0.09	0.406	FALSE	-0.029	0.415	FALSE	-0.023	0.542	FALSE
51666	ASB4	-0.478	-0.046	FALSE	-0.412	-0.033	FALSE	-0.354	0.004	FALSE	-0.292	-0.035	FALSE	-0.161	-0.155	FALSE
140458	ASB5	-0.233	-0.117	FALSE	-0.197	-0.107	FALSE	-0.124	-0.159	FALSE	-0.071	-0.294	FALSE	-0.023	-0.619	FALSE
140459	ASB6	-0.183	0.006	FALSE	-0.147	0.041	FALSE	-0.124	0.099	FALSE	-0.099	0.27	FALSE	-0.068	0.376	FALSE
140460	ASB7	-0.276	0.106	FALSE	-0.25	0.123	FALSE	-0.192	0.026	FALSE	-0.128	0.064	FALSE	-0.043	0.097	FALSE
140461	ASB8	-0.078	0.11	FALSE	-0.06	0.202	FALSE	-0.049	0.259	FALSE	-0.04	0.407	FALSE	-0.029	0.758	FALSE
140462	ASB9	-0.346	-0.105	FALSE	-0.285	-0.051	FALSE	-0.208	-0.079	FALSE	-0.147	-0.116	FALSE	-0.062	-0.197	FALSE
51008	ASCC1	-0.376	0.099	FALSE	-0.27	0.099	FALSE	-0.2	-0.024	FALSE	-0.139	-0.105	FALSE	-0.043	-0.578	FALSE
84164	ASCC2	-0.58	0.013	TRUE	-0.454	0.025	TRUE	-0.382	0.026	TRUE	-0.26	0.003	TRUE	-0.171	0.035	TRUE
10973	ASCC3	-0.418	0.059	FALSE	-0.32	0.039	FALSE	-0.261	0.082	FALSE	-0.194	0.15	FALSE	-0.084	0.075	FALSE
429	ASCL1	-0.429	-0.061	FALSE	-0.355	-0.005	FALSE	-0.28	0.005	FALSE	-0.214	0.001	FALSE	-0.114	-0.023	FALSE
430	ASCL2	-0.31	0.224	FALSE	-0.255	0.301	FALSE	-0.178	0.408	FALSE	-0.111	0.448	FALSE	-0.001	0.688	FALSE
56676	ASCL3	-0.46	-0.023	FALSE	-0.396	0.01	FALSE	-0.294	-0.039	FALSE	-0.217	-0.043	FALSE	-0.13	0.027	FALSE
121549	ASCL4	-0.419	0.091	FALSE	-0.349	0.113	FALSE	-0.272	0.118	FALSE	-0.218	0.101	FALSE	-0.109	0.199	FALSE
25842	ASF1A	-0.465	-0.053	FALSE	-0.429	-0.035	FALSE	-0.396	-0.07	FALSE	-0.31	-0.091	FALSE	-0.204	-0.076	FALSE
55723	ASF1B	-0.546	-0.094	TRUE	-0.436	-0.053	TRUE	-0.396	-0.052	TRUE	-0.308	-0.036	TRUE	-0.206	-0.016	TRUE
432	ASGR1	-0.473	-0.048	FALSE	-0.44	-0.008	FALSE	-0.393	0.011	FALSE	-0.312	-0.034	FALSE	-0.236	-0.019	FALSE
433	ASGR2	-0.659	-0.08	TRUE	-0.546	-0.08	TRUE	-0.495	-0.053	TRUE	-0.426	-0.028	TRUE	-0.311	-0.064	TRUE
55870	ASH1L	-0.589	0.091	TRUE	-0.496	0.082	TRUE	-0.393	-0.003	TRUE	-0.298	-0.039	TRUE	-0.169	-0.13	TRUE
9070	ASH2L	-1.393	0.181	TRUE	-1.276	0.223	TRUE	-1.12	0.163	TRUE	-0.985	0.138	TRUE	-0.75	0.12	TRUE
41	ASIC1	-0.626	-0.167	TRUE	-0.456	-0.226	TRUE	-0.373	-0.289	TRUE	-0.309	-0.251	TRUE	-0.17	-0.186	TRUE
40	ASIC2	-0.611	0.091	TRUE	-0.534	0.161	TRUE	-0.48	0.151	TRUE	-0.396	0.135	TRUE	-0.252	0.144	TRUE
51802	ASIC5	-0.45	-0.199	FALSE	-0.381	-0.182	FALSE	-0.299	-0.261	FALSE	-0.207	-0.329	FALSE	-0.069	-0.664	FALSE
434	ASIP	-0.202	0.088	FALSE	-0.143	-0.006	FALSE	-0.103	-0.032	FALSE	-0.072	0.062	FALSE	-0.027	0.158	FALSE
435	ASL	-0.467	-0.061	FALSE	-0.422	-0.038	FALSE	-0.366	-0.037	FALSE	-0.303	-0.024	FALSE	-0.194	-0.032	FALSE
438	ASMT	-0.478	0.301	FALSE	-0.366	0.355	FALSE	-0.246	0.424	FALSE	-0.166	0.513	FALSE	-0.037	0.372	FALSE
8623	ASMTL	-0.436	0.03	FALSE	-0.388	0.061	FALSE	-0.35	0.068	FALSE	-0.287	0.098	FALSE	-0.167	-0.052	FALSE
439	ASNA1	-0.486	0.076	FALSE	-0.424	0.15	FALSE	-0.35	0.227	FALSE	-0.296	0.311	FALSE	-0.192	0.527	FALSE
440	ASNS	-0.804	0.074	TRUE	-0.6	0.081	TRUE	-0.488	0.122	TRUE	-0.338	0.065	TRUE	-0.157	-0.065	TRUE
54529	ASNSD1	-0.462	0.226	FALSE	-0.387	0.309	FALSE	-0.297	0.358	FALSE	-0.22	0.43	FALSE	-0.08	0.274	FALSE
443	ASPA	-0.253	0.122	FALSE	-0.193	0.173	FALSE	-0.15	0.208	FALSE	-0.076	0.188	FALSE	-0.02	0.378	FALSE
444	ASPH	-0.459	0.08	FALSE	-0.389	0.014	FALSE	-0.313	0.035	FALSE	-0.258	0.1	FALSE	-0.158	0.056	FALSE
253982	ASPHD1	-0.506	-0.299	FALSE	-0.42	-0.333	FALSE	-0.352	-0.345	FALSE	-0.298	-0.273	FALSE	-0.198	-0.073	FALSE
57168	ASPHD2	-0.314	0.037	FALSE	-0.241	0.002	FALSE	-0.178	-0.01	FALSE	-0.115	-0.023	FALSE	-0.031	-0.104	FALSE
259266	ASPM	-0.583	-0.222	TRUE	-0.469	-0.233	TRUE	-0.38	-0.307	TRUE	-0.297	-0.292	TRUE	-0.192	-0.232	TRUE
151516	ASPRV1	-0.632	0.051	TRUE	-0.44	0.058	TRUE	-0.366	0.062	TRUE	-0.303	0.042	TRUE	-0.161	-0.2	TRUE
80150	ASRGL1	-0.407	-0.036	FALSE	-0.35	-0.04	FALSE	-0.314	0.018	FALSE	-0.253	0.081	FALSE	-0.145	0	FALSE
445	ASS1	-0.588	0.204	TRUE	-0.447	0.21	TRUE	-0.355	0.234	TRUE	-0.294	0.337	TRUE	-0.158	0.389	TRUE
28990	ASTE1	-0.419	0.014	FALSE	-0.278	-0.019	FALSE	-0.196	-0.041	FALSE	-0.113	-0.118	FALSE	-0.026	-0.596	FALSE
431705	ASTL	-0.492	-0.284	FALSE	-0.44	-0.277	FALSE	-0.382	-0.296	FALSE	-0.312	-0.244	FALSE	-0.203	-0.04	FALSE
460	ASTN1	-0.353	0.122	FALSE	-0.255	0.115	FALSE	-0.193	0.031	FALSE	-0.123	-0.133	FALSE	-0.027	-0.894	FALSE
23245	ASTN2	-0.627	-0.196	TRUE	-0.578	-0.19	TRUE	-0.513	-0.155	TRUE	-0.436	-0.054	TRUE	-0.313	0.025	TRUE
171023	ASXL1	-0.484	-0.112	FALSE	-0.409	-0.197	FALSE	-0.362	-0.162	FALSE	-0.305	-0.186	FALSE	-0.21	-0.027	FALSE
80816	ASXL3	-0.381	-0.223	FALSE	-0.332	-0.233	FALSE	-0.234	-0.268	FALSE	-0.158	-0.346	FALSE	-0.061	-0.697	FALSE
136991	ASZ1	-0.385	0.133	FALSE	-0.321	0.107	FALSE	-0.221	0.103	FALSE	-0.136	-0.049	FALSE	-0.037	-0.656	FALSE
84896	ATAD1	-0.457	0.029	FALSE	-0.371	-0.037	FALSE	-0.286	-0.072	FALSE	-0.224	-0.065	FALSE	-0.112	-0.121	FALSE
29028	ATAD2	-0.394	-0.174	FALSE	-0.336	-0.228	FALSE	-0.308	-0.202	FALSE	-0.242	-0.271	FALSE	-0.156	-0.235	FALSE
54454	ATAD2B	-0.465	-0.076	FALSE	-0.328	-0.084	FALSE	-0.241	-0.116	FALSE	-0.188	-0.105	FALSE	-0.115	-0.044	FALSE
55210	ATAD3A	-0.571	0.002	TRUE	-0.491	-0.004	TRUE	-0.425	-0.027	TRUE	-0.309	-0.038	TRUE	-0.167	-0.144	TRUE
83858	ATAD3B	-1.076	-0.021	TRUE	-0.907	-0.007	TRUE	-0.838	0.097	TRUE	-0.728	0.239	TRUE	-0.541	0.415	TRUE
219293	ATAD3C	-0.32	-0.15	FALSE	-0.244	-0.17	FALSE	-0.206	-0.147	FALSE	-0.122	-0.275	FALSE	-0.026	-0.681	FALSE
79915	ATAD5	-0.5	-0.085	FALSE	-0.384	-0.129	FALSE	-0.3	-0.156	FALSE	-0.249	-0.135	FALSE	-0.154	-0.203	FALSE
79969	ATAT1	-0.333	-0.153	FALSE	-0.278	-0.176	FALSE	-0.203	-0.224	FALSE	-0.135	-0.3	FALSE	-0.051	-0.655	FALSE
85300	ATCAY	-0.352	0.128	FALSE	-0.318	0.125	FALSE	-0.259	0.147	FALSE	-0.172	0.181	FALSE	-0.057	0.034	FALSE
466	ATF1	-0.482	0.052	FALSE	-0.395	0.068	FALSE	-0.292	0.06	FALSE	-0.222	0.083	FALSE	-0.135	0.233	FALSE
1386	ATF2	-0.364	-0.05	FALSE	-0.281	-0.071	FALSE	-0.245	-0.032	FALSE	-0.154	-0.071	FALSE	-0.065	0.031	FALSE
467	ATF3	-0.571	-0.09	TRUE	-0.433	-0.114	TRUE	-0.372	-0.127	TRUE	-0.297	-0.206	TRUE	-0.211	-0.138	TRUE
468	ATF4	-0.9	0.107	TRUE	-0.807	0.147	TRUE	-0.696	0.163	TRUE	-0.531	0.165	TRUE	-0.327	0.258	TRUE
22926	ATF6	-0.379	0.033	FALSE	-0.292	0.07	FALSE	-0.231	0.062	FALSE	-0.17	0.139	FALSE	-0.071	0.216	FALSE
1388	ATF6B	-0.277	-0.105	FALSE	-0.216	-0.093	FALSE	-0.146	-0.096	FALSE	-0.104	-0.065	FALSE	-0.029	-0.077	FALSE
11016	ATF7	-0.437	-0.006	FALSE	-0.383	0.022	FALSE	-0.303	0.009	FALSE	-0.237	0.022	FALSE	-0.118	-0.138	FALSE
55729	ATF7IP	-0.538	0.034	FALSE	-0.401	0.061	FALSE	-0.326	0.019	FALSE	-0.275	0.041	FALSE	-0.146	-0.006	FALSE
80063	ATF7IP2	-0.355	-0.047	FALSE	-0.298	-0.043	FALSE	-0.257	-0.067	FALSE	-0.198	-0.054	FALSE	-0.108	-0.092	FALSE
83734	ATG10	-0.388	-0.064	FALSE	-0.237	-0.116	FALSE	-0.192	-0.094	FALSE	-0.144	-0.121	FALSE	-0.066	-0.209	FALSE
60673	ATG101	-0.462	-0.135	FALSE	-0.386	-0.173	FALSE	-0.344	-0.195	FALSE	-0.242	-0.301	FALSE	-0.108	-0.464	FALSE
9140	ATG12	-0.42	0.1	FALSE	-0.334	0.106	FALSE	-0.257	0.097	FALSE	-0.163	0.064	FALSE	-0.081	0.163	FALSE
9776	ATG13	-0.538	-0.167	FALSE	-0.407	-0.206	FALSE	-0.346	-0.193	FALSE	-0.272	-0.295	FALSE	-0.157	-0.242	FALSE
22863	ATG14	-0.455	-0.124	FALSE	-0.359	-0.188	FALSE	-0.322	-0.192	FALSE	-0.268	-0.182	FALSE	-0.174	-0.161	FALSE
55054	ATG16L1	-0.308	-0.162	FALSE	-0.272	-0.216	FALSE	-0.224	-0.206	FALSE	-0.167	-0.254	FALSE	-0.095	-0.371	FALSE
89849	ATG16L2	-0.41	0.145	FALSE	-0.309	0.145	FALSE	-0.183	0.04	FALSE	-0.14	0.039	FALSE	-0.048	0.076	FALSE
23130	ATG2A	-0.255	-0.062	FALSE	-0.171	-0.045	FALSE	-0.141	-0.056	FALSE	-0.101	-0.068	FALSE	-0.06	-0.164	FALSE
55102	ATG2B	-0.384	-0.241	FALSE	-0.326	-0.299	FALSE	-0.249	-0.377	FALSE	-0.206	-0.435	FALSE	-0.131	-0.334	FALSE
64422	ATG3	-0.339	-0.203	FALSE	-0.258	-0.204	FALSE	-0.217	-0.222	FALSE	-0.16	-0.326	FALSE	-0.104	-0.32	FALSE
115201	ATG4A	-0.244	0.14	FALSE	-0.198	0.159	FALSE	-0.138	0.099	FALSE	-0.085	0.162	FALSE	0.002	0.313	FALSE
23192	ATG4B	-0.288	0.006	FALSE	-0.209	0.075	FALSE	-0.161	0.091	FALSE	-0.105	0.11	FALSE	-0.01	0.147	FALSE
84938	ATG4C	-0.599	0.112	TRUE	-0.433	0.109	TRUE	-0.365	0.085	TRUE	-0.298	0.021	TRUE	-0.214	0.102	TRUE
84971	ATG4D	-0.523	0.043	FALSE	-0.456	0.034	FALSE	-0.413	0.044	FALSE	-0.32	0.053	FALSE	-0.216	0.073	FALSE
9474	ATG5	-0.285	-0.253	FALSE	-0.226	-0.248	FALSE	-0.192	-0.221	FALSE	-0.137	-0.28	FALSE	-0.057	-0.388	FALSE
10533	ATG7	-0.588	-0.047	TRUE	-0.443	-0.052	TRUE	-0.383	-0.099	TRUE	-0.33	-0.061	TRUE	-0.224	-0.077	TRUE
79065	ATG9A	-0.309	-0.152	FALSE	-0.271	-0.104	FALSE	-0.216	-0.123	FALSE	-0.171	-0.142	FALSE	-0.079	-0.488	FALSE
471	ATIC	-0.552	-0.034	TRUE	-0.479	0.02	TRUE	-0.382	-0.001	TRUE	-0.298	-0.042	TRUE	-0.202	-0.098	TRUE
51062	ATL1	-0.489	-0.043	FALSE	-0.406	-0.113	FALSE	-0.334	-0.101	FALSE	-0.233	-0.191	FALSE	-0.085	-0.586	FALSE
64225	ATL2	-0.502	-0.119	FALSE	-0.464	-0.074	FALSE	-0.419	-0.058	FALSE	-0.339	-0.071	FALSE	-0.236	-0.069	FALSE
25923	ATL3	-0.33	-0.06	FALSE	-0.231	-0.032	FALSE	-0.181	-0.069	FALSE	-0.11	-0.07	FALSE	-0.033	-0.171	FALSE
472	ATM	-0.224	0.339	FALSE	-0.191	0.348	FALSE	-0.15	0.163	FALSE	-0.102	0.043	FALSE	-0.045	0.089	FALSE
23300	ATMIN	-0.226	-0.115	FALSE	-0.203	-0.05	FALSE	-0.18	-0.082	FALSE	-0.139	-0.124	FALSE	-0.081	-0.227	FALSE
1822	ATN1	-0.355	-0.027	FALSE	-0.301	-0.072	FALSE	-0.258	-0.064	FALSE	-0.193	-0.146	FALSE	-0.131	-0.083	FALSE
474	ATOH1	-0.52	0.238	FALSE	-0.383	0.181	FALSE	-0.294	0.172	FALSE	-0.226	0.227	FALSE	-0.126	0.332	FALSE
220202	ATOH7	-0.311	-0.044	FALSE	-0.277	0.002	FALSE	-0.245	0.07	FALSE	-0.207	0.155	FALSE	-0.107	0.202	FALSE
84913	ATOH8	-0.686	-0.02	TRUE	-0.626	0.035	TRUE	-0.54	0.04	TRUE	-0.454	0.028	TRUE	-0.334	0.003	TRUE
475	ATOX1	-0.462	-0.065	FALSE	-0.394	-0.057	FALSE	-0.349	-0.035	FALSE	-0.266	-0.042	FALSE	-0.178	-0.04	FALSE
57194	ATP10A	-0.527	0.209	FALSE	-0.411	0.291	FALSE	-0.339	0.267	FALSE	-0.251	0.236	FALSE	-0.114	0.353	FALSE
23120	ATP10B	-0.262	-0.206	FALSE	-0.209	-0.19	FALSE	-0.151	-0.247	FALSE	-0.095	-0.33	FALSE	-0.028	-0.609	FALSE
57205	ATP10D	-0.56	0.224	TRUE	-0.49	0.186	TRUE	-0.4	0.117	TRUE	-0.313	0.082	TRUE	-0.187	-0.079	TRUE
23250	ATP11A	-0.478	0.144	FALSE	-0.392	0.215	FALSE	-0.303	0.207	FALSE	-0.224	0.181	FALSE	-0.099	0.197	FALSE
23200	ATP11B	-0.299	0.075	FALSE	-0.261	0.115	FALSE	-0.199	0.13	FALSE	-0.134	0.168	FALSE	-0.045	0.3	FALSE
286410	ATP11C	-0.478	0.003	FALSE	-0.371	0.035	FALSE	-0.314	0.084	FALSE	-0.246	0.09	FALSE	-0.145	0.097	FALSE
479	ATP12A	-0.514	0.165	FALSE	-0.42	0.171	FALSE	-0.311	0.064	FALSE	-0.228	-0.011	FALSE	-0.142	0.051	FALSE
57130	ATP13A1	-0.412	-0.011	FALSE	-0.375	0.051	FALSE	-0.309	0.046	FALSE	-0.267	0.088	FALSE	-0.186	0.084	FALSE
23400	ATP13A2	-0.332	-0.08	FALSE	-0.255	-0.059	FALSE	-0.216	-0.034	FALSE	-0.136	-0.048	FALSE	-0.051	-0.024	FALSE
79572	ATP13A3	-0.405	-0.205	FALSE	-0.309	-0.242	FALSE	-0.239	-0.309	FALSE	-0.169	-0.346	FALSE	-0.084	-0.601	FALSE
84239	ATP13A4	-0.375	-0.16	FALSE	-0.28	-0.233	FALSE	-0.219	-0.309	FALSE	-0.164	-0.357	FALSE	-0.069	-0.676	FALSE
344905	ATP13A5	-0.321	-0.067	FALSE	-0.264	-0.027	FALSE	-0.163	-0.117	FALSE	-0.098	-0.167	FALSE	-0.024	-0.504	FALSE
476	ATP1A1	-1.129	0.068	TRUE	-1.045	0.146	TRUE	-0.948	0.16	TRUE	-0.832	0.219	TRUE	-0.632	0.276	TRUE
477	ATP1A2	-0.389	-0.074	FALSE	-0.307	-0.079	FALSE	-0.254	-0.061	FALSE	-0.177	-0.127	FALSE	-0.114	-0.047	FALSE
478	ATP1A3	-0.316	0.11	FALSE	-0.28	0.008	FALSE	-0.234	0.046	FALSE	-0.168	0.068	FALSE	-0.089	0.109	FALSE
480	ATP1A4	-0.363	-0.031	FALSE	-0.298	0.017	FALSE	-0.245	-0.071	FALSE	-0.193	-0.034	FALSE	-0.107	-0.02	FALSE
481	ATP1B1	-0.254	0.08	FALSE	-0.181	0.031	FALSE	-0.123	0.043	FALSE	-0.066	-0.023	FALSE	-0.027	0.202	FALSE
482	ATP1B2	-0.311	-0.159	FALSE	-0.252	-0.167	FALSE	-0.196	-0.175	FALSE	-0.125	-0.261	FALSE	-0.049	-0.774	FALSE
483	ATP1B3	-0.447	0.001	FALSE	-0.355	0.035	FALSE	-0.274	0.026	FALSE	-0.207	0.027	FALSE	-0.105	0.047	FALSE
23439	ATP1B4	-0.219	-0.006	FALSE	-0.172	0.036	FALSE	-0.133	0.079	FALSE	-0.077	-0.016	FALSE	-0.032	-0.01	FALSE
91419	ATP23	-0.618	-0.211	TRUE	-0.526	-0.212	TRUE	-0.4	-0.28	TRUE	-0.296	-0.294	TRUE	-0.175	-0.288	TRUE
488	ATP2A2	-1.059	0.058	TRUE	-1.003	0.082	TRUE	-0.948	0.1	TRUE	-0.849	0.107	TRUE	-0.668	0.143	TRUE
489	ATP2A3	-0.328	0.049	FALSE	-0.207	-0.022	FALSE	-0.162	0.001	FALSE	-0.105	0.053	FALSE	-0.033	0.158	FALSE
490	ATP2B1	-0.556	-0.156	TRUE	-0.457	-0.163	TRUE	-0.392	-0.155	TRUE	-0.341	-0.146	TRUE	-0.248	-0.127	TRUE
491	ATP2B2	-0.399	0.025	FALSE	-0.356	0.043	FALSE	-0.301	0.051	FALSE	-0.224	0.054	FALSE	-0.12	0.002	FALSE
492	ATP2B3	-0.362	-0.032	FALSE	-0.292	-0.03	FALSE	-0.257	-0.021	FALSE	-0.203	0.055	FALSE	-0.1	0.001	FALSE
493	ATP2B4	-0.41	-0.17	FALSE	-0.364	-0.19	FALSE	-0.335	-0.165	FALSE	-0.248	-0.177	FALSE	-0.166	-0.175	FALSE
27032	ATP2C1	-0.409	-0.036	FALSE	-0.32	-0.08	FALSE	-0.275	-0.063	FALSE	-0.219	-0.032	FALSE	-0.137	0.009	FALSE
9914	ATP2C2	-0.498	0.091	FALSE	-0.362	0.109	FALSE	-0.275	0.079	FALSE	-0.171	0.006	FALSE	-0.065	-0.235	FALSE
495	ATP4A	-0.605	0.169	TRUE	-0.55	0.176	TRUE	-0.49	0.252	TRUE	-0.395	0.362	TRUE	-0.245	0.502	TRUE
496	ATP4B	-0.356	-0.137	FALSE	-0.272	-0.109	FALSE	-0.224	-0.157	FALSE	-0.145	-0.264	FALSE	-0.028	-0.893	FALSE
498	ATP5F1A	-1.029	-0.059	TRUE	-0.887	-0.027	TRUE	-0.755	-0.024	TRUE	-0.68	0.04	TRUE	-0.498	0.076	TRUE
506	ATP5F1B	-0.947	-0.025	TRUE	-0.837	-0.07	TRUE	-0.758	-0.044	TRUE	-0.685	-0.021	TRUE	-0.545	-0.025	TRUE
509	ATP5F1C	-1.096	0.024	TRUE	-0.901	0.017	TRUE	-0.797	0.034	TRUE	-0.66	0.052	TRUE	-0.453	0.02	TRUE
513	ATP5F1D	-0.569	0.013	TRUE	-0.495	-0.015	TRUE	-0.435	0.008	TRUE	-0.364	0.04	TRUE	-0.273	0.099	TRUE
514	ATP5F1E	-0.391	0.177	FALSE	-0.336	0.289	FALSE	-0.299	0.404	FALSE	-0.241	0.53	FALSE	-0.095	0.914	FALSE
93974	ATP5IF1	-0.085	-0.07	FALSE	-0.067	-0.033	FALSE	-0.056	-0.028	FALSE	-0.041	0.124	FALSE	-0.03	0.377	FALSE
516	ATP5MC1	-0.324	0.15	FALSE	-0.247	0.226	FALSE	-0.188	0.196	FALSE	-0.142	0.194	FALSE	-0.076	0.405	FALSE
517	ATP5MC2	-0.442	0.077	FALSE	-0.358	0.12	FALSE	-0.304	0.173	FALSE	-0.215	0.129	FALSE	-0.103	0.067	FALSE
518	ATP5MC3	-0.507	0.042	FALSE	-0.378	0.005	FALSE	-0.318	0.018	FALSE	-0.227	0.056	FALSE	-0.121	0.007	FALSE
84833	ATP5MD	-0.582	-0.069	TRUE	-0.504	-0.14	TRUE	-0.412	-0.213	TRUE	-0.336	-0.209	TRUE	-0.189	-0.117	TRUE
521	ATP5ME	-0.77	-0.089	TRUE	-0.708	-0.033	TRUE	-0.628	0.002	TRUE	-0.555	0.032	TRUE	-0.411	0.091	TRUE
9551	ATP5MF	-0.634	0.065	TRUE	-0.501	-0.031	TRUE	-0.427	-0.008	TRUE	-0.34	0.009	TRUE	-0.221	0.076	TRUE
10632	ATP5MG	-0.42	-0.094	FALSE	-0.377	-0.061	FALSE	-0.345	-0.049	FALSE	-0.261	-0.092	FALSE	-0.171	-0.14	FALSE
9556	ATP5MPL	-0.912	-0.089	TRUE	-0.833	-0.036	TRUE	-0.763	0.062	TRUE	-0.655	0.201	TRUE	-0.472	0.726	TRUE
515	ATP5PB	-0.371	-0.116	FALSE	-0.341	-0.022	FALSE	-0.254	-0.02	FALSE	-0.206	-0.014	FALSE	-0.128	-0.039	FALSE
10476	ATP5PD	-1.065	0.038	TRUE	-0.961	0.037	TRUE	-0.877	0.123	TRUE	-0.729	0.247	TRUE	-0.512	0.556	TRUE
522	ATP5PF	-0.638	-0.04	TRUE	-0.529	-0.02	TRUE	-0.489	0.002	TRUE	-0.396	-0.025	TRUE	-0.287	0.08	TRUE
539	ATP5PO	-0.968	0.026	TRUE	-0.792	0.063	TRUE	-0.71	0.093	TRUE	-0.609	0.115	TRUE	-0.421	0.122	TRUE
27109	DMAC2L	-0.29	-0.091	FALSE	-0.25	-0.044	FALSE	-0.192	-0.054	FALSE	-0.154	-0.059	FALSE	-0.049	-0.286	FALSE
537	ATP6AP1	-1.164	-0.088	TRUE	-1.098	-0.088	TRUE	-0.956	-0.061	TRUE	-0.85	-0.074	TRUE	-0.703	-0.133	TRUE
92270	ATP6AP1L	-0.496	-0.098	FALSE	-0.402	-0.106	FALSE	-0.364	-0.171	FALSE	-0.276	-0.288	FALSE	-0.141	-0.299	FALSE
10159	ATP6AP2	-0.785	-0.205	TRUE	-0.726	-0.182	TRUE	-0.644	-0.202	TRUE	-0.569	-0.249	TRUE	-0.469	-0.286	TRUE
535	ATP6V0A1	-0.344	0.143	FALSE	-0.234	0.065	FALSE	-0.183	0.063	FALSE	-0.125	0.084	FALSE	-0.043	0.11	FALSE
23545	ATP6V0A2	-0.304	-0.141	FALSE	-0.168	-0.192	FALSE	-0.115	-0.264	FALSE	-0.066	-0.438	FALSE	-0.032	-0.874	FALSE
50617	ATP6V0A4	-0.584	0.08	TRUE	-0.536	0.145	TRUE	-0.444	0.092	TRUE	-0.365	0.104	TRUE	-0.259	0.159	TRUE
533	ATP6V0B	-0.867	0.077	TRUE	-0.697	0.102	TRUE	-0.624	0.156	TRUE	-0.558	0.239	TRUE	-0.464	0.573	TRUE
527	ATP6V0C	-1.927	0.041	TRUE	-1.677	0.072	TRUE	-1.577	0.126	TRUE	-1.4	0.153	TRUE	-1.177	0.197	TRUE
9114	ATP6V0D1	-1.158	-0.053	TRUE	-1.028	0.026	TRUE	-0.952	0.12	TRUE	-0.878	0.248	TRUE	-0.755	0.341	TRUE
245972	ATP6V0D2	-0.185	0.061	FALSE	-0.144	0.034	FALSE	-0.098	0.002	FALSE	-0.05	0.047	FALSE	-0.021	0.309	FALSE
8992	ATP6V0E1	-0.533	0.147	FALSE	-0.412	0.118	FALSE	-0.37	0.117	FALSE	-0.323	0.155	FALSE	-0.203	0.188	FALSE
155066	ATP6V0E2	-0.141	0.27	FALSE	-0.065	0.029	FALSE	-0.038	0.028	FALSE	-0.023	0.106	FALSE	-0.018	0.401	FALSE
523	ATP6V1A	-1.104	-0.052	TRUE	-0.99	-0.012	TRUE	-0.877	0.03	TRUE	-0.736	0.05	TRUE	-0.595	0.087	TRUE
525	ATP6V1B1	-0.293	-0.069	FALSE	-0.255	-0.016	FALSE	-0.187	-0.059	FALSE	-0.12	-0.037	FALSE	-0.038	-0.018	FALSE
526	ATP6V1B2	-1.534	0.115	TRUE	-1.399	0.201	TRUE	-1.238	0.27	TRUE	-1.101	0.333	TRUE	-0.768	0.424	TRUE
528	ATP6V1C1	-0.631	-0.114	TRUE	-0.533	-0.13	TRUE	-0.481	-0.119	TRUE	-0.397	-0.093	TRUE	-0.3	-0.191	TRUE
245973	ATP6V1C2	-0.3	0.052	FALSE	-0.238	0.097	FALSE	-0.193	0.111	FALSE	-0.137	0.081	FALSE	-0.056	-0.011	FALSE
51382	ATP6V1D	-0.64	-0.021	TRUE	-0.443	-0.054	TRUE	-0.4	-0.097	TRUE	-0.344	-0.134	TRUE	-0.262	-0.135	TRUE
9296	ATP6V1F	-0.714	0.164	TRUE	-0.663	0.264	TRUE	-0.626	0.371	TRUE	-0.591	0.547	TRUE	-0.218	0.707	TRUE
534	ATP6V1G2	-0.489	0.048	FALSE	-0.444	0.074	FALSE	-0.386	0.111	FALSE	-0.32	0.159	FALSE	-0.188	0.194	FALSE
127124	ATP6V1G3	-0.639	0.518	TRUE	-0.529	0.519	TRUE	-0.424	0.567	TRUE	-0.312	0.527	TRUE	-0.145	0.385	TRUE
51606	ATP6V1H	-0.363	0.074	FALSE	-0.304	0.074	FALSE	-0.271	0.093	FALSE	-0.222	0.195	FALSE	-0.136	0.462	FALSE
538	ATP7A	-0.483	0.059	FALSE	-0.415	0.093	FALSE	-0.362	0.032	FALSE	-0.265	-0.023	FALSE	-0.16	-0.076	FALSE
540	ATP7B	-0.657	0	TRUE	-0.55	-0.026	TRUE	-0.48	0.014	TRUE	-0.404	-0.082	TRUE	-0.308	-0.019	TRUE
10396	ATP8A1	-0.291	0.017	FALSE	-0.229	0.009	FALSE	-0.163	-0.025	FALSE	-0.094	0.027	FALSE	-0.029	0.058	FALSE
51761	ATP8A2	-0.364	-0.031	FALSE	-0.314	-0.041	FALSE	-0.276	-0.051	FALSE	-0.225	-0.038	FALSE	-0.127	-0.046	FALSE
5205	ATP8B1	-0.313	-0.061	FALSE	-0.247	0.022	FALSE	-0.191	0.047	FALSE	-0.119	0.087	FALSE	-0.032	0.105	FALSE
57198	ATP8B2	-0.525	0.068	FALSE	-0.429	-0.068	FALSE	-0.356	-0.053	FALSE	-0.271	-0.078	FALSE	-0.188	-0.029	FALSE
148229	ATP8B3	-0.343	-0.062	FALSE	-0.305	-0.057	FALSE	-0.22	-0.123	FALSE	-0.165	-0.132	FALSE	-0.088	-0.163	FALSE
79895	ATP8B4	-0.365	0.102	FALSE	-0.304	0.07	FALSE	-0.262	0.071	FALSE	-0.216	0.067	FALSE	-0.115	0.039	FALSE
10079	ATP9A	-0.367	0.059	FALSE	-0.321	0.118	FALSE	-0.272	0.04	FALSE	-0.195	0.054	FALSE	-0.116	0.132	FALSE
374868	ATP9B	-0.522	-0.063	FALSE	-0.385	-0.102	FALSE	-0.332	-0.101	FALSE	-0.264	-0.123	FALSE	-0.173	-0.132	FALSE
64756	ATPAF1	-0.334	-0.013	FALSE	-0.279	0.043	FALSE	-0.195	0.039	FALSE	-0.13	0.061	FALSE	-0.043	0.055	FALSE
91647	ATPAF2	-0.156	-0.005	FALSE	-0.127	0.056	FALSE	-0.096	0.1	FALSE	-0.048	0.148	FALSE	-0.025	0.481	FALSE
545	ATR	-1.37	0.112	TRUE	-1.218	0.105	TRUE	-1.036	0.088	TRUE	-0.885	0.121	TRUE	-0.623	0.098	TRUE
51374	ATRAID	-0.785	-0.182	TRUE	-0.711	-0.117	TRUE	-0.612	-0.058	TRUE	-0.499	0.033	TRUE	-0.32	0.364	TRUE
84126	ATRIP	-0.549	-0.273	TRUE	-0.468	-0.282	TRUE	-0.408	-0.306	TRUE	-0.342	-0.323	TRUE	-0.261	-0.35	TRUE
8455	ATRN	-0.248	-0.074	FALSE	-0.204	-0.059	FALSE	-0.126	-0.127	FALSE	-0.086	-0.13	FALSE	-0.033	-0.131	FALSE
26033	ATRNL1	-0.586	0.101	TRUE	-0.508	0.126	TRUE	-0.444	0.161	TRUE	-0.381	0.229	TRUE	-0.266	0.362	TRUE
546	ATRX	-0.538	0.023	FALSE	-0.507	0.075	FALSE	-0.389	0.053	FALSE	-0.286	0.054	FALSE	-0.164	0.105	FALSE
6310	ATXN1	-0.398	0.167	FALSE	-0.302	0.214	FALSE	-0.22	0.19	FALSE	-0.166	0.202	FALSE	-0.049	0.117	FALSE
25814	ATXN10	-0.284	-0.013	FALSE	-0.188	-0.071	FALSE	-0.166	-0.054	FALSE	-0.122	-0.038	FALSE	-0.051	0.036	FALSE
6311	ATXN2	-0.098	-0.127	FALSE	-0.071	-0.168	FALSE	-0.043	-0.138	FALSE	-0.035	-0.101	FALSE	-0.026	0.084	FALSE
11273	ATXN2L	-0.371	0.155	FALSE	-0.318	0.124	FALSE	-0.213	0.105	FALSE	-0.12	0.081	FALSE	-0.043	-0.537	FALSE
4287	ATXN3	-0.491	0.086	FALSE	-0.417	0.09	FALSE	-0.312	0.084	FALSE	-0.259	0.102	FALSE	-0.145	0.107	FALSE
6314	ATXN7	-0.585	-0.02	TRUE	-0.552	0.009	TRUE	-0.445	-0.033	TRUE	-0.363	-0.031	TRUE	-0.229	0.079	TRUE
222255	ATXN7L1	-0.514	0.062	FALSE	-0.367	-0.137	FALSE	-0.289	-0.161	FALSE	-0.226	-0.259	FALSE	-0.097	-0.505	FALSE
127002	ATXN7L2	-0.344	-0.011	FALSE	-0.28	-0.12	FALSE	-0.196	-0.173	FALSE	-0.125	-0.284	FALSE	-0.035	-0.887	FALSE
549	AUH	-0.403	-0.048	FALSE	-0.323	-0.054	FALSE	-0.278	-0.067	FALSE	-0.218	-0.058	FALSE	-0.135	-0.02	FALSE
550	AUP1	-0.473	-0.044	FALSE	-0.423	0.011	FALSE	-0.353	0.002	FALSE	-0.296	-0.034	FALSE	-0.185	-0.093	FALSE
6790	AURKA	-0.892	0.027	TRUE	-0.779	-0.003	TRUE	-0.697	0.023	TRUE	-0.587	-0.004	TRUE	-0.444	-0.051	TRUE
54998	AURKAIP1	-0.551	-0.104	TRUE	-0.5	-0.164	TRUE	-0.426	-0.191	TRUE	-0.365	-0.21	TRUE	-0.283	-0.139	TRUE
9212	AURKB	-1.329	0.011	TRUE	-1.081	-0.022	TRUE	-0.972	-0.016	TRUE	-0.82	-0.017	TRUE	-0.65	0.021	TRUE
6795	AURKC	-0.307	-0.019	FALSE	-0.239	-0.035	FALSE	-0.174	-0.016	FALSE	-0.126	0.043	FALSE	-0.039	0.044	FALSE
26053	AUTS2	-0.522	-0.106	FALSE	-0.438	-0.056	FALSE	-0.333	-0.128	FALSE	-0.261	-0.176	FALSE	-0.105	-0.492	FALSE
57099	AVEN	-0.294	-0.016	FALSE	-0.187	-0.048	FALSE	-0.126	-0.051	FALSE	-0.061	-0.142	FALSE	-0.032	-0.254	FALSE
10677	AVIL	-0.262	-0.064	FALSE	-0.208	-0.066	FALSE	-0.165	-0.028	FALSE	-0.11	-0.076	FALSE	-0.038	-0.153	FALSE
23080	AVL9	-0.147	0.021	FALSE	-0.054	-0.041	FALSE	-0.035	-0.023	FALSE	-0.025	0.105	FALSE	-0.023	0.321	FALSE
551	AVP	-0.443	0	FALSE	-0.339	0.064	FALSE	-0.256	0.025	FALSE	-0.207	0.055	FALSE	-0.1	-0.198	FALSE
60370	AVPI1	-0.404	-0.134	FALSE	-0.339	-0.152	FALSE	-0.288	-0.131	FALSE	-0.219	-0.302	FALSE	-0.097	-0.53	FALSE
552	AVPR1A	-0.435	-0.071	FALSE	-0.374	-0.037	FALSE	-0.312	-0.044	FALSE	-0.23	-0.032	FALSE	-0.14	0.024	FALSE
553	AVPR1B	-0.609	0.004	TRUE	-0.527	-0.001	TRUE	-0.44	-0.108	TRUE	-0.37	-0.065	TRUE	-0.265	-0.052	TRUE
554	AVPR2	-0.424	0.168	FALSE	-0.352	0.159	FALSE	-0.279	0.172	FALSE	-0.195	0.199	FALSE	-0.09	0.143	FALSE
158833	AWAT1	-0.346	0.163	FALSE	-0.226	0.165	FALSE	-0.183	0.183	FALSE	-0.112	0.286	FALSE	-0.024	0.306	FALSE
158835	AWAT2	-0.612	-0.02	TRUE	-0.571	0.037	TRUE	-0.527	0.047	TRUE	-0.445	0.007	TRUE	-0.314	0.344	TRUE
126859	AXDND1	-0.258	-0.174	FALSE	-0.199	-0.183	FALSE	-0.146	-0.234	FALSE	-0.088	-0.326	FALSE	-0.034	-0.751	FALSE
8312	AXIN1	-0.372	0.208	FALSE	-0.341	0.241	FALSE	-0.264	0.25	FALSE	-0.18	0.255	FALSE	-0.058	0.273	FALSE
8313	AXIN2	-0.239	0.032	FALSE	-0.189	0.1	FALSE	-0.154	0.053	FALSE	-0.097	0.064	FALSE	-0.027	-0.002	FALSE
558	AXL	-0.352	-0.138	FALSE	-0.254	-0.144	FALSE	-0.202	-0.155	FALSE	-0.154	-0.183	FALSE	-0.075	-0.219	FALSE
563	AZGP1	-0.279	-0.207	FALSE	-0.242	-0.231	FALSE	-0.209	-0.181	FALSE	-0.138	-0.229	FALSE	-0.068	-0.202	FALSE
64343	AZI2	-0.445	-0.048	FALSE	-0.319	-0.087	FALSE	-0.244	-0.094	FALSE	-0.162	-0.08	FALSE	-0.061	-0.298	FALSE
51582	AZIN1	-0.527	-0.079	FALSE	-0.458	-0.152	FALSE	-0.406	-0.196	FALSE	-0.35	-0.184	FALSE	-0.266	0.085	FALSE
113451	AZIN2	-0.49	0	FALSE	-0.419	-0.057	FALSE	-0.332	-0.034	FALSE	-0.237	-0.107	FALSE	-0.145	-0.233	FALSE
566	AZU1	-0.844	-0.17	TRUE	-0.665	-0.153	TRUE	-0.584	-0.087	TRUE	-0.524	0.056	TRUE	-0.412	-0.028	TRUE
567	B2M	-0.354	0.072	FALSE	-0.281	0.123	FALSE	-0.231	0.107	FALSE	-0.174	0.145	FALSE	-0.067	0.111	FALSE
8706	B3GALNT1	-0.33	-0.1	FALSE	-0.301	-0.027	FALSE	-0.233	-0.006	FALSE	-0.169	-0.019	FALSE	-0.078	-0.165	FALSE
148789	B3GALNT2	-0.322	0.071	FALSE	-0.26	0.072	FALSE	-0.187	0.092	FALSE	-0.122	-0.011	FALSE	-0.042	-0.051	FALSE
8708	B3GALT1	-0.39	-0.175	FALSE	-0.329	-0.117	FALSE	-0.262	-0.177	FALSE	-0.186	-0.208	FALSE	-0.096	-0.329	FALSE
8707	B3GALT2	-0.22	-0.067	FALSE	-0.164	0.031	FALSE	-0.11	0.053	FALSE	-0.036	-0.014	FALSE	-0.022	0.197	FALSE
8705	B3GALT4	-0.158	-0.072	FALSE	-0.111	-0.06	FALSE	-0.076	0.002	FALSE	-0.043	0.009	FALSE	-0.023	0.264	FALSE
10317	B3GALT5	-0.274	0.064	FALSE	-0.2	0.106	FALSE	-0.16	0.066	FALSE	-0.103	0.153	FALSE	-0.019	0.026	FALSE
126792	B3GALT6	-0.469	0.133	FALSE	-0.337	0.028	FALSE	-0.268	-0.016	FALSE	-0.225	-0.038	FALSE	-0.146	0.003	FALSE
27087	B3GAT1	-0.1	-0.164	FALSE	-0.072	-0.136	FALSE	-0.027	-0.128	FALSE	-0.024	-0.055	FALSE	-0.022	0.132	FALSE
135152	B3GAT2	-0.471	0.166	FALSE	-0.38	0.174	FALSE	-0.322	0.21	FALSE	-0.243	0.247	FALSE	-0.114	0.019	FALSE
26229	B3GAT3	-0.489	-0.125	FALSE	-0.428	-0.139	FALSE	-0.394	-0.083	FALSE	-0.332	-0.069	FALSE	-0.226	0.043	FALSE
145173	B3GLCT	-0.72	0.049	TRUE	-0.625	0.107	TRUE	-0.537	0.152	TRUE	-0.413	0.142	TRUE	-0.311	0.134	TRUE
10678	B3GNT2	-0.62	0.094	TRUE	-0.504	0.144	TRUE	-0.382	0.146	TRUE	-0.294	0.19	TRUE	-0.147	0.221	TRUE
10331	B3GNT3	-0.312	-0.133	FALSE	-0.28	-0.06	FALSE	-0.247	-0.003	FALSE	-0.182	0.018	FALSE	-0.1	-0.015	FALSE
79369	B3GNT4	-0.34	-0.149	FALSE	-0.265	-0.194	FALSE	-0.217	-0.177	FALSE	-0.181	-0.145	FALSE	-0.099	-0.308	FALSE
84002	B3GNT5	-0.185	-0.033	FALSE	-0.152	-0.04	FALSE	-0.113	-0.038	FALSE	-0.061	-0.013	FALSE	-0.025	0.139	FALSE
192134	B3GNT6	-0.298	0.383	FALSE	-0.227	0.341	FALSE	-0.177	0.395	FALSE	-0.108	0.399	FALSE	-0.032	0.437	FALSE
374907	B3GNT8	-0.248	-0.166	FALSE	-0.192	-0.142	FALSE	-0.147	-0.16	FALSE	-0.114	-0.125	FALSE	-0.046	-0.309	FALSE
146712	B3GNTL1	-0.298	-0.191	FALSE	-0.229	-0.208	FALSE	-0.184	-0.218	FALSE	-0.12	-0.322	FALSE	-0.024	-0.768	FALSE
2583	B4GALNT1	-0.382	0.066	FALSE	-0.306	0.118	FALSE	-0.253	0.157	FALSE	-0.182	0.267	FALSE	-0.081	0.294	FALSE
124872	B4GALNT2	-0.366	0.098	FALSE	-0.304	0.137	FALSE	-0.246	0.183	FALSE	-0.192	0.283	FALSE	-0.073	0.244	FALSE
283358	B4GALNT3	-0.29	-0.035	FALSE	-0.259	0.064	FALSE	-0.221	0.036	FALSE	-0.171	-0.006	FALSE	-0.088	-0.037	FALSE
338707	B4GALNT4	-0.187	0.207	FALSE	-0.15	0.086	FALSE	-0.123	0.177	FALSE	-0.04	0.196	FALSE	-0.024	0.535	FALSE
2683	B4GALT1	-0.416	-0.011	FALSE	-0.337	-0.051	FALSE	-0.286	-0.008	FALSE	-0.22	-0.056	FALSE	-0.127	-0.142	FALSE
8704	B4GALT2	-0.388	0.082	FALSE	-0.28	0.131	FALSE	-0.225	0.11	FALSE	-0.155	0.175	FALSE	-0.043	0.08	FALSE
8703	B4GALT3	-0.552	-0.015	TRUE	-0.49	-0.003	TRUE	-0.421	0.031	TRUE	-0.344	-0.009	TRUE	-0.227	-0.013	TRUE
8702	B4GALT4	-0.889	0.308	TRUE	-0.797	0.414	TRUE	-0.695	0.443	TRUE	-0.502	0.535	TRUE	-0.225	0.438	TRUE
9334	B4GALT5	-0.356	-0.038	FALSE	-0.291	-0.066	FALSE	-0.256	-0.041	FALSE	-0.199	-0.054	FALSE	-0.103	-0.19	FALSE
11285	B4GALT7	-0.765	0.014	TRUE	-0.675	0.043	TRUE	-0.618	0.029	TRUE	-0.536	0.046	TRUE	-0.406	0.084	TRUE
27077	B9D1	-0.331	-0.036	FALSE	-0.261	-0.051	FALSE	-0.209	-0.026	FALSE	-0.151	-0.014	FALSE	-0.066	-0.171	FALSE
79870	BAALC	-0.077	0.104	FALSE	-0.038	0.138	FALSE	-0.028	0.241	FALSE	-0.026	0.453	FALSE	-0.024	0.844	FALSE
570	BAAT	-0.343	0.243	FALSE	-0.275	0.257	FALSE	-0.206	0.301	FALSE	-0.112	0.361	FALSE	-0.023	0.258	FALSE
9577	BABAM2	-0.299	0.129	FALSE	-0.239	0.135	FALSE	-0.19	0.197	FALSE	-0.122	0.172	FALSE	-0.032	0.052	FALSE
23621	BACE1	-0.539	0.246	FALSE	-0.456	0.349	FALSE	-0.346	0.391	FALSE	-0.251	0.374	FALSE	-0.119	0.486	FALSE
25825	BACE2	-0.618	0.305	TRUE	-0.568	0.341	TRUE	-0.497	0.391	TRUE	-0.42	0.432	TRUE	-0.236	0.204	TRUE
571	BACH1	-0.546	0.067	TRUE	-0.364	0.019	TRUE	-0.304	0.001	TRUE	-0.219	-0.029	TRUE	-0.114	-0.002	TRUE
60468	BACH2	-0.262	-0.021	FALSE	-0.236	-0.025	FALSE	-0.178	-0.005	FALSE	-0.122	-0.011	FALSE	-0.025	0.003	FALSE
572	BAD	-0.338	0.032	FALSE	-0.275	0.032	FALSE	-0.24	-0.031	FALSE	-0.175	-0.014	FALSE	-0.096	-0.006	FALSE
573	BAG1	-0.559	-0.168	TRUE	-0.523	-0.128	TRUE	-0.415	-0.184	TRUE	-0.364	-0.159	TRUE	-0.275	-0.14	TRUE
9532	BAG2	-0.426	0.093	FALSE	-0.301	0.006	FALSE	-0.242	-0.018	FALSE	-0.179	0.016	FALSE	-0.106	0.044	FALSE
9531	BAG3	-0.414	0.059	FALSE	-0.328	0.005	FALSE	-0.261	0.013	FALSE	-0.21	0.019	FALSE	-0.102	-0.007	FALSE
9530	BAG4	-0.223	0.103	FALSE	-0.138	0.179	FALSE	-0.062	0.06	FALSE	-0.029	0.158	FALSE	-0.021	0.537	FALSE
9529	BAG5	-0.593	-0.096	TRUE	-0.491	-0.144	TRUE	-0.433	-0.141	TRUE	-0.34	-0.185	TRUE	-0.259	0.16	TRUE
7917	BAG6	-0.524	0.106	FALSE	-0.446	0.11	FALSE	-0.389	0.149	FALSE	-0.29	0.182	FALSE	-0.176	0.151	FALSE
22893	BAHD1	-0.282	-0.108	FALSE	-0.191	-0.131	FALSE	-0.127	-0.197	FALSE	-0.074	-0.251	FALSE	-0.032	-0.433	FALSE
10458	BAIAP2	-0.426	0.083	FALSE	-0.314	0.101	FALSE	-0.267	0.107	FALSE	-0.185	0.158	FALSE	-0.079	0.245	FALSE
55971	BAIAP2L1	-0.243	-0.102	FALSE	-0.165	-0.073	FALSE	-0.108	-0.07	FALSE	-0.061	-0.06	FALSE	-0.024	0.03	FALSE
80115	BAIAP2L2	-0.415	-0.18	FALSE	-0.359	-0.237	FALSE	-0.294	-0.258	FALSE	-0.214	-0.337	FALSE	-0.096	-0.525	FALSE
8938	BAIAP3	-0.14	0.011	FALSE	-0.096	0.058	FALSE	-0.062	0.095	FALSE	-0.051	0.121	FALSE	-0.037	0.442	FALSE
578	BAK1	-0.209	0.057	FALSE	-0.131	0.092	FALSE	-0.101	0.191	FALSE	-0.066	0.347	FALSE	-0.027	0.76	FALSE
25805	BAMBI	-0.39	0.125	FALSE	-0.319	0.162	FALSE	-0.231	0.17	FALSE	-0.139	0.215	FALSE	-0.032	-0.455	FALSE
8815	BANF1	-0.968	-0.216	TRUE	-0.863	-0.222	TRUE	-0.798	-0.195	TRUE	-0.736	-0.179	TRUE	-0.61	-0.074	TRUE
140836	BANF2	-0.197	0.019	FALSE	-0.092	-0.048	FALSE	-0.026	-0.242	FALSE	-0.023	-0.148	FALSE	-0.022	-0.092	FALSE
55024	BANK1	-0.36	0.116	FALSE	-0.282	0.076	FALSE	-0.224	0.034	FALSE	-0.168	0.107	FALSE	-0.072	0.018	FALSE
8314	BAP1	-0.697	0.06	TRUE	-0.594	0.003	TRUE	-0.491	-0.02	TRUE	-0.404	-0.036	TRUE	-0.301	-0.039	TRUE
580	BARD1	-0.625	0.021	TRUE	-0.526	0.049	TRUE	-0.411	0.063	TRUE	-0.35	0.153	TRUE	-0.191	0.13	TRUE
343472	BARHL2	-0.563	-0.124	TRUE	-0.494	-0.048	TRUE	-0.423	-0.018	TRUE	-0.332	-0.039	TRUE	-0.222	0.047	TRUE
56033	BARX1	-0.393	0.103	FALSE	-0.331	0.195	FALSE	-0.184	0.085	FALSE	-0.107	0.142	FALSE	-0.029	0.135	FALSE
8538	BARX2	-0.426	-0.054	FALSE	-0.35	0.01	FALSE	-0.272	0.032	FALSE	-0.212	0.065	FALSE	-0.099	0.093	FALSE
10409	BASP1	-0.133	0.158	FALSE	-0.089	0.219	FALSE	-0.034	0.307	FALSE	-0.022	0.427	FALSE	-0.02	0.485	FALSE
10538	BATF	-0.56	0.039	TRUE	-0.479	0.123	TRUE	-0.298	0.071	TRUE	-0.236	0.106	TRUE	-0.122	0.157	TRUE
116071	BATF2	-0.231	0.118	FALSE	-0.16	0.128	FALSE	-0.107	0.122	FALSE	-0.074	0.233	FALSE	-0.029	0.595	FALSE
55509	BATF3	-0.457	-0.022	FALSE	-0.399	0.006	FALSE	-0.334	0.026	FALSE	-0.276	0.04	FALSE	-0.168	0.074	FALSE
581	BAX	-0.627	0.128	TRUE	-0.521	0.094	TRUE	-0.426	0.07	TRUE	-0.343	0.099	TRUE	-0.242	0.006	TRUE
11177	BAZ1A	-0.366	-0.183	FALSE	-0.274	-0.218	FALSE	-0.228	-0.2	FALSE	-0.165	-0.23	FALSE	-0.093	-0.198	FALSE
9031	BAZ1B	-0.589	0.009	TRUE	-0.543	-0.046	TRUE	-0.438	-0.11	TRUE	-0.364	-0.077	TRUE	-0.259	-0.029	TRUE
11176	BAZ2A	-0.354	0.082	FALSE	-0.284	0.058	FALSE	-0.193	0.059	FALSE	-0.131	0.08	FALSE	-0.049	0.098	FALSE
29994	BAZ2B	-0.448	-0.108	FALSE	-0.342	-0.095	FALSE	-0.27	-0.063	FALSE	-0.202	-0.071	FALSE	-0.119	-0.021	FALSE
27113	BBC3	-0.736	0.174	TRUE	-0.655	0.122	TRUE	-0.589	0.092	TRUE	-0.508	0.098	TRUE	-0.385	0.103	TRUE
8424	BBOX1	-0.415	0.282	FALSE	-0.346	0.366	FALSE	-0.267	0.359	FALSE	-0.177	0.443	FALSE	-0.064	0.697	FALSE
582	BBS1	-0.146	-0.14	FALSE	-0.135	-0.075	FALSE	-0.099	-0.071	FALSE	-0.073	-0.037	FALSE	-0.036	0.146	FALSE
583	BBS2	-0.309	0.228	FALSE	-0.213	0.249	FALSE	-0.164	0.325	FALSE	-0.052	0.334	FALSE	-0.022	0.424	FALSE
585	BBS4	-0.341	0.148	FALSE	-0.276	0.206	FALSE	-0.229	0.124	FALSE	-0.147	0.15	FALSE	-0.041	-0.046	FALSE
129880	BBS5	-0.301	-0.251	FALSE	-0.267	-0.269	FALSE	-0.225	-0.299	FALSE	-0.163	-0.406	FALSE	-0.054	-0.782	FALSE
55212	BBS7	-0.422	-0.056	FALSE	-0.316	-0.094	FALSE	-0.268	-0.054	FALSE	-0.221	-0.04	FALSE	-0.128	-0.066	FALSE
27241	BBS9	-0.218	-0.076	FALSE	-0.176	-0.131	FALSE	-0.129	-0.179	FALSE	-0.097	-0.16	FALSE	-0.051	-0.396	FALSE
56987	BBX	-0.181	0.342	FALSE	-0.118	0.301	FALSE	-0.059	0.384	FALSE	-0.025	0.43	FALSE	-0.02	0.99	FALSE
4059	BCAM	-0.338	-0.13	FALSE	-0.268	-0.151	FALSE	-0.206	-0.182	FALSE	-0.151	-0.219	FALSE	-0.081	-0.263	FALSE
63827	BCAN	-0.452	-0.145	FALSE	-0.364	-0.155	FALSE	-0.291	-0.179	FALSE	-0.205	-0.242	FALSE	-0.127	-0.29	FALSE
55973	BCAP29	-0.761	-0.108	TRUE	-0.611	-0.126	TRUE	-0.518	-0.148	TRUE	-0.447	-0.036	TRUE	-0.292	0.26	TRUE
9564	BCAR1	-0.72	0.089	TRUE	-0.597	0.108	TRUE	-0.525	0.116	TRUE	-0.433	0.158	TRUE	-0.278	0.223	TRUE
8412	BCAR3	-0.415	-0.124	FALSE	-0.32	-0.15	FALSE	-0.259	-0.146	FALSE	-0.183	-0.13	FALSE	-0.097	-0.155	FALSE
8537	BCAS1	-0.09	0.049	FALSE	-0.031	-0.133	FALSE	-0.024	-0.051	FALSE	-0.023	0.058	FALSE	-0.021	0.31	FALSE
10286	BCAS2	-0.775	0.09	TRUE	-0.594	0.058	TRUE	-0.464	0.017	TRUE	-0.347	0.031	TRUE	-0.229	-0.038	TRUE
54828	BCAS3	-0.21	-0.034	FALSE	-0.148	-0.093	FALSE	-0.114	-0.111	FALSE	-0.082	-0.072	FALSE	-0.037	0.097	FALSE
55653	BCAS4	-0.174	0.078	FALSE	-0.105	-0.006	FALSE	-0.074	0.036	FALSE	-0.039	0.031	FALSE	-0.027	-0.075	FALSE
586	BCAT1	-0.361	0.11	FALSE	-0.209	0.076	FALSE	-0.156	0.127	FALSE	-0.094	0.163	FALSE	-0.011	0.32	FALSE
587	BCAT2	-0.345	0.067	FALSE	-0.29	0.123	FALSE	-0.244	0.188	FALSE	-0.188	0.251	FALSE	-0.056	0.001	FALSE
56647	BCCIP	-1.07	0.066	TRUE	-0.925	0.063	TRUE	-0.847	0.125	TRUE	-0.709	0.062	TRUE	-0.54	-0.003	TRUE
144233	BCDIN3D	-0.491	0.005	FALSE	-0.426	-0.003	FALSE	-0.334	-0.025	FALSE	-0.276	0.004	FALSE	-0.159	-0.079	FALSE
590	BCHE	-0.332	0.182	FALSE	-0.266	0.137	FALSE	-0.196	0.135	FALSE	-0.116	0.201	FALSE	-0.019	0.365	FALSE
593	BCKDHA	-0.306	-0.09	FALSE	-0.267	-0.046	FALSE	-0.235	-0.015	FALSE	-0.174	-0.019	FALSE	-0.088	-0.18	FALSE
594	BCKDHB	-0.259	0.078	FALSE	-0.207	0.048	FALSE	-0.168	0.117	FALSE	-0.1	0.109	FALSE	-0.037	0.082	FALSE
10295	BCKDK	-0.454	0.068	FALSE	-0.409	0.032	FALSE	-0.362	0.015	FALSE	-0.275	-0.04	FALSE	-0.185	-0.059	FALSE
8915	BCL10	-0.484	0.012	FALSE	-0.398	0.017	FALSE	-0.353	0.068	FALSE	-0.294	0.141	FALSE	-0.192	0.252	FALSE
53335	BCL11A	-0.283	0.371	FALSE	-0.225	0.229	FALSE	-0.177	0.174	FALSE	-0.143	0.238	FALSE	-0.031	0.307	FALSE
64919	BCL11B	-0.371	0.108	FALSE	-0.285	0.048	FALSE	-0.242	0.067	FALSE	-0.182	0.044	FALSE	-0.088	0.053	FALSE
596	BCL2	-0.533	0.156	FALSE	-0.387	0.057	FALSE	-0.282	0.067	FALSE	-0.187	0.075	FALSE	-0.055	0.073	FALSE
597	BCL2A1	-0.313	-0.142	FALSE	-0.271	-0.053	FALSE	-0.217	-0.057	FALSE	-0.162	-0.07	FALSE	-0.086	-0.241	FALSE
598	BCL2L1	-1.684	0.51	TRUE	-1.472	0.625	TRUE	-1.214	0.741	TRUE	-0.9	0.88	TRUE	-0.53	1.366	TRUE
10017	BCL2L10	-0.545	0.334	TRUE	-0.372	0.174	TRUE	-0.315	0.128	TRUE	-0.251	0.132	TRUE	-0.161	0.197	TRUE
10018	BCL2L11	-0.387	-0.014	FALSE	-0.341	0.003	FALSE	-0.273	-0.014	FALSE	-0.202	-0.022	FALSE	-0.089	-0.247	FALSE
83596	BCL2L12	-0.638	0.267	TRUE	-0.563	0.23	TRUE	-0.5	0.287	TRUE	-0.446	0.244	TRUE	-0.303	0.296	TRUE
23786	BCL2L13	-0.28	-0.158	FALSE	-0.242	-0.209	FALSE	-0.205	-0.174	FALSE	-0.16	-0.136	FALSE	-0.079	-0.219	FALSE
79370	BCL2L14	-0.428	0.144	FALSE	-0.341	0.09	FALSE	-0.251	0.016	FALSE	-0.187	0.036	FALSE	-0.107	0.176	FALSE
599	BCL2L2	-0.5	0.074	FALSE	-0.377	0.073	FALSE	-0.277	0.105	FALSE	-0.215	0.153	FALSE	-0.101	0.188	FALSE
602	BCL3	-0.43	-0.046	FALSE	-0.367	-0.088	FALSE	-0.29	-0.083	FALSE	-0.236	-0.054	FALSE	-0.14	-0.087	FALSE
604	BCL6	-0.523	-0.106	FALSE	-0.403	-0.075	FALSE	-0.347	-0.109	FALSE	-0.267	-0.088	FALSE	-0.173	-0.124	FALSE
255877	BCL6B	-0.363	-0.145	FALSE	-0.279	-0.129	FALSE	-0.236	-0.18	FALSE	-0.169	-0.229	FALSE	-0.098	-0.248	FALSE
605	BCL7A	-0.513	0.112	FALSE	-0.402	0.088	FALSE	-0.324	0.093	FALSE	-0.273	0.148	FALSE	-0.144	0.126	FALSE
9275	BCL7B	-0.589	0.181	TRUE	-0.471	0.158	TRUE	-0.38	0.16	TRUE	-0.297	0.167	TRUE	-0.156	-0.036	TRUE
9274	BCL7C	-0.073	0.057	FALSE	-0.05	0.085	FALSE	-0.029	0.148	FALSE	-0.025	0.343	FALSE	0.002	0.721	FALSE
607	BCL9	-0.531	-0.093	FALSE	-0.437	-0.05	FALSE	-0.371	-0.075	FALSE	-0.331	-0.048	FALSE	-0.226	0.012	FALSE
283149	BCL9L	-0.333	-0.053	FALSE	-0.295	-0.019	FALSE	-0.27	0.005	FALSE	-0.186	-0.051	FALSE	-0.108	-0.134	FALSE
9774	BCLAF1	-0.999	0.042	TRUE	-0.907	0.025	TRUE	-0.785	0.048	TRUE	-0.674	0.065	TRUE	-0.469	0.052	TRUE
256643	BCLAF3	-0.206	-0.106	FALSE	-0.183	-0.1	FALSE	-0.156	-0.069	FALSE	-0.117	-0.082	FALSE	-0.031	-0.296	FALSE
53630	BCO1	-0.838	0.406	TRUE	-0.725	0.462	TRUE	-0.583	0.57	TRUE	-0.434	0.605	TRUE	-0.206	0.743	TRUE
83875	BCO2	-0.515	0.098	FALSE	-0.404	0.13	FALSE	-0.334	0.117	FALSE	-0.256	0.177	FALSE	-0.137	0.031	FALSE
54880	BCOR	-0.545	0.073	TRUE	-0.444	-0.005	TRUE	-0.383	0.053	TRUE	-0.328	0.048	TRUE	-0.188	0.064	TRUE
63035	BCORL1	-0.222	0.102	FALSE	-0.179	0.182	FALSE	-0.12	0.195	FALSE	-0.054	0.233	FALSE	-0.022	0.562	FALSE
613	BCR	-0.432	0.096	FALSE	-0.285	0.161	FALSE	-0.245	0.259	FALSE	-0.17	0.278	FALSE	-0.074	0.324	FALSE
617	BCS1L	-0.652	-0.171	TRUE	-0.571	-0.147	TRUE	-0.503	-0.136	TRUE	-0.439	-0.093	TRUE	-0.293	-0.122	TRUE
622	BDH1	-1.031	-0.042	TRUE	-0.924	0.001	TRUE	-0.837	0.018	TRUE	-0.756	0.013	TRUE	-0.576	-0.057	TRUE
56898	BDH2	-0.255	0.093	FALSE	-0.189	0.115	FALSE	-0.136	0.107	FALSE	-0.077	0.079	FALSE	-0.031	0.292	FALSE
623	BDKRB1	-0.505	-0.144	FALSE	-0.455	-0.181	FALSE	-0.381	-0.145	FALSE	-0.32	-0.14	FALSE	-0.232	-0.071	FALSE
624	BDKRB2	-0.568	-0.073	TRUE	-0.51	-0.048	TRUE	-0.426	-0.02	TRUE	-0.335	-0.052	TRUE	-0.242	0.007	TRUE
627	BDNF	-0.475	0.085	FALSE	-0.401	0.04	FALSE	-0.327	0.038	FALSE	-0.209	-0.024	FALSE	-0.116	-0.147	FALSE
55814	BDP1	-0.519	0.259	FALSE	-0.45	0.301	FALSE	-0.379	0.383	FALSE	-0.248	0.363	FALSE	-0.11	0.464	FALSE
8678	BECN1	-0.599	0.338	TRUE	-0.357	0.275	TRUE	-0.279	0.218	TRUE	-0.205	0.187	TRUE	-0.103	0.147	TRUE
57596	BEGAIN	-0.694	-0.23	TRUE	-0.59	-0.215	TRUE	-0.505	-0.169	TRUE	-0.444	-0.05	TRUE	-0.355	0.064	TRUE
139105	BEND2	-0.331	-0.05	FALSE	-0.256	-0.027	FALSE	-0.206	-0.029	FALSE	-0.109	-0.154	FALSE	-0.022	-0.594	FALSE
79656	BEND5	-0.261	-0.199	FALSE	-0.227	-0.169	FALSE	-0.17	-0.194	FALSE	-0.118	-0.228	FALSE	-0.027	-0.847	FALSE
221336	BEND6	-0.505	-0.106	FALSE	-0.415	-0.172	FALSE	-0.364	-0.192	FALSE	-0.298	-0.246	FALSE	-0.162	-0.197	FALSE
7439	BEST1	-0.357	0.147	FALSE	-0.26	0.142	FALSE	-0.18	0.158	FALSE	-0.089	0.059	FALSE	-0.023	-0.408	FALSE
54831	BEST2	-0.398	-0.076	FALSE	-0.309	-0.119	FALSE	-0.267	-0.086	FALSE	-0.179	-0.207	FALSE	-0.054	-0.773	FALSE
144453	BEST3	-0.258	-0.029	FALSE	-0.215	-0.034	FALSE	-0.157	-0.151	FALSE	-0.108	-0.221	FALSE	-0.039	-0.739	FALSE
266675	BEST4	-0.265	0.018	FALSE	-0.201	0.042	FALSE	-0.148	0.077	FALSE	-0.074	0.034	FALSE	-0.032	-0.135	FALSE
10282	BET1	-0.541	-0.129	FALSE	-0.443	-0.139	FALSE	-0.386	-0.102	FALSE	-0.326	-0.135	FALSE	-0.237	-0.071	FALSE
55859	BEX1	-0.122	-0.208	FALSE	-0.093	-0.222	FALSE	-0.043	-0.325	FALSE	-0.026	-0.358	FALSE	-0.023	-0.34	FALSE
84707	BEX2	-0.166	0.02	FALSE	-0.103	-0.028	FALSE	-0.062	-0.062	FALSE	-0.034	0.015	FALSE	-0.026	0.05	FALSE
27018	BEX3	-0.245	0.169	FALSE	-0.204	0.25	FALSE	-0.112	0.218	FALSE	-0.045	0.138	FALSE	-0.023	0.438	FALSE
340542	BEX5	-0.543	0.05	FALSE	-0.443	0.075	FALSE	-0.387	0.105	FALSE	-0.27	-0.005	FALSE	-0.074	-0.637	FALSE
51283	BFAR	-0.244	0.159	FALSE	-0.205	0.244	FALSE	-0.149	0.33	FALSE	-0.065	0.462	FALSE	-0.024	0.772	FALSE
631	BFSP1	-0.498	0.134	FALSE	-0.419	0.027	FALSE	-0.341	0.036	FALSE	-0.266	0.036	FALSE	-0.183	0.075	FALSE
8419	BFSP2	-0.304	-0.101	FALSE	-0.237	-0.104	FALSE	-0.203	-0.076	FALSE	-0.141	-0.154	FALSE	-0.055	-0.287	FALSE
632	BGLAP	-0.029	0.176	FALSE	0.008	0.251	FALSE	0.059	0.345	FALSE	0.116	0.449	FALSE	0.183	1.084	FALSE
633	BGN	-0.552	-0.037	TRUE	-0.518	-0.03	TRUE	-0.477	-0.03	TRUE	-0.379	-0.051	TRUE	-0.254	0.153	TRUE
168620	BHLHA15	-0.234	-0.212	FALSE	-0.153	-0.206	FALSE	-0.122	-0.218	FALSE	-0.084	-0.184	FALSE	-0.025	-0.113	FALSE
80823	BHLHB9	-0.198	-0.29	FALSE	-0.165	-0.256	FALSE	-0.132	-0.244	FALSE	-0.082	-0.355	FALSE	-0.025	-0.786	FALSE
27319	BHLHE22	-0.459	0.217	FALSE	-0.356	0.147	FALSE	-0.291	0.155	FALSE	-0.243	0.134	FALSE	-0.132	0.094	FALSE
128408	BHLHE23	-0.389	0.091	FALSE	-0.317	0.09	FALSE	-0.249	0.114	FALSE	-0.173	0.193	FALSE	-0.066	0.221	FALSE
8553	BHLHE40	-0.423	-0.058	FALSE	-0.328	-0.008	FALSE	-0.296	-0.008	FALSE	-0.226	0.032	FALSE	-0.127	0.028	FALSE
79365	BHLHE41	-0.515	0.39	FALSE	-0.436	0.342	FALSE	-0.371	0.399	FALSE	-0.27	0.462	FALSE	-0.121	0.526	FALSE
635	BHMT	-0.302	-0.096	FALSE	-0.241	-0.123	FALSE	-0.195	-0.112	FALSE	-0.146	-0.15	FALSE	-0.068	-0.157	FALSE
23743	BHMT2	-0.497	0.222	FALSE	-0.403	0.269	FALSE	-0.335	0.155	FALSE	-0.264	0.156	FALSE	-0.163	0.227	FALSE
80114	BICC1	-0.39	-0.235	FALSE	-0.354	-0.228	FALSE	-0.286	-0.284	FALSE	-0.2	-0.342	FALSE	-0.065	-0.698	FALSE
636	BICD1	-0.121	0.061	FALSE	-0.096	-0.003	FALSE	-0.075	0.055	FALSE	-0.05	0.151	FALSE	-0.034	0.24	FALSE
23299	BICD2	-0.485	0.046	FALSE	-0.39	0.049	FALSE	-0.335	-0.001	FALSE	-0.269	-0.013	FALSE	-0.163	-0.175	FALSE
92558	BICDL1	-0.346	0.096	FALSE	-0.269	0.054	FALSE	-0.205	0.024	FALSE	-0.121	-0.09	FALSE	-0.032	-0.769	FALSE
29998	BICRA	-0.354	0.045	FALSE	-0.231	0.044	FALSE	-0.191	0.094	FALSE	-0.121	0.119	FALSE	-0.037	-0.037	FALSE
637	BID	-0.346	0.155	FALSE	-0.272	0.097	FALSE	-0.225	0.08	FALSE	-0.168	0.067	FALSE	-0.057	-0.092	FALSE
638	BIK	-0.387	0.261	FALSE	-0.307	0.17	FALSE	-0.247	0.169	FALSE	-0.155	0.106	FALSE	-0.045	-0.073	FALSE
274	BIN1	-0.597	-0.157	TRUE	-0.477	-0.15	TRUE	-0.42	-0.142	TRUE	-0.341	-0.163	TRUE	-0.232	-0.019	TRUE
51411	BIN2	-0.266	-0.175	FALSE	-0.219	-0.191	FALSE	-0.161	-0.203	FALSE	-0.123	-0.164	FALSE	-0.044	-0.255	FALSE
55909	BIN3	-0.31	-0.122	FALSE	-0.252	-0.17	FALSE	-0.208	-0.191	FALSE	-0.142	-0.237	FALSE	-0.067	-0.301	FALSE
329	BIRC2	-0.552	-0.057	TRUE	-0.45	-0.051	TRUE	-0.371	-0.022	TRUE	-0.276	-0.038	TRUE	-0.186	0.029	TRUE
330	BIRC3	-0.446	-0.024	FALSE	-0.359	-0.052	FALSE	-0.238	-0.12	FALSE	-0.173	-0.146	FALSE	-0.089	-0.221	FALSE
332	BIRC5	-1.516	0.097	TRUE	-1.346	0.116	TRUE	-1.196	0.122	TRUE	-1.105	0.145	TRUE	-0.889	0.12	TRUE
57448	BIRC6	-0.697	-0.005	TRUE	-0.544	-0.05	TRUE	-0.461	-0.07	TRUE	-0.378	-0.103	TRUE	-0.259	-0.137	TRUE
79444	BIRC7	-0.431	-0.096	FALSE	-0.36	-0.131	FALSE	-0.308	-0.133	FALSE	-0.253	-0.15	FALSE	-0.185	-0.172	FALSE
112401	BIRC8	-0.573	0.162	TRUE	-0.536	0.184	TRUE	-0.45	0.183	TRUE	-0.325	0.18	TRUE	-0.208	0.086	TRUE
54841	BIVM	-0.324	-0.105	FALSE	-0.27	-0.095	FALSE	-0.234	-0.109	FALSE	-0.155	-0.248	FALSE	-0.042	-0.827	FALSE
10904	BLCAP	-0.426	-0.035	FALSE	-0.364	-0.046	FALSE	-0.265	-0.058	FALSE	-0.204	-0.071	FALSE	-0.117	-0.106	FALSE
640	BLK	-0.372	-0.078	FALSE	-0.287	-0.073	FALSE	-0.249	-0.058	FALSE	-0.157	-0.051	FALSE	-0.08	0.007	FALSE
641	BLM	-0.466	-0.035	FALSE	-0.389	-0.056	FALSE	-0.336	-0.106	FALSE	-0.267	-0.098	FALSE	-0.172	-0.118	FALSE
642	BLMH	-0.227	-0.048	FALSE	-0.12	-0.022	FALSE	-0.081	-0.003	FALSE	-0.037	-0.005	FALSE	-0.023	0.23	FALSE
29760	BLNK	-0.483	0.064	FALSE	-0.416	0.075	FALSE	-0.355	0.101	FALSE	-0.263	0.136	FALSE	-0.153	0.253	FALSE
2647	BLOC1S1	-0.12	0.313	FALSE	-0.069	0.426	FALSE	-0.03	0.58	FALSE	-0.024	0.779	FALSE	-0.018	1.433	FALSE
282991	BLOC1S2	-0.65	-0.075	TRUE	-0.59	-0.15	TRUE	-0.475	-0.196	TRUE	-0.408	-0.096	TRUE	-0.247	0.11	TRUE
55330	BLOC1S4	-0.269	-0.147	FALSE	-0.202	-0.19	FALSE	-0.125	-0.283	FALSE	-0.059	-0.383	FALSE	-0.026	-0.673	FALSE
63915	BLOC1S5	-0.75	-0.093	TRUE	-0.648	-0.093	TRUE	-0.59	-0.074	TRUE	-0.496	0.028	TRUE	-0.32	0.359	TRUE
26258	BLOC1S6	-0.179	0.17	FALSE	-0.136	0.239	FALSE	-0.069	0.284	FALSE	-0.034	0.367	FALSE	-0.026	0.301	FALSE
644	BLVRA	-0.324	0.314	FALSE	-0.247	0.468	FALSE	-0.184	0.553	FALSE	-0.101	0.555	FALSE	-0.022	0.742	FALSE
645	BLVRB	-0.323	0.592	FALSE	-0.276	0.755	FALSE	-0.192	0.863	FALSE	-0.089	0.906	FALSE	-0.022	1.346	FALSE
8548	BLZF1	-0.459	-0.08	FALSE	-0.367	-0.045	FALSE	-0.301	-0.013	FALSE	-0.254	0.054	FALSE	-0.151	0.02	FALSE
90427	BMF	-0.312	-0.089	FALSE	-0.238	-0.11	FALSE	-0.181	-0.161	FALSE	-0.108	-0.333	FALSE	-0.051	-0.77	FALSE
648	BMI1	-0.38	0.044	FALSE	-0.301	0.082	FALSE	-0.254	-0.013	FALSE	-0.198	0.042	FALSE	-0.097	-0.14	FALSE
649	BMP1	-0.432	0.024	FALSE	-0.347	0.029	FALSE	-0.272	-0.046	FALSE	-0.221	-0.09	FALSE	-0.127	-0.235	FALSE
27302	BMP10	-0.436	-0.046	FALSE	-0.279	-0.154	FALSE	-0.243	-0.184	FALSE	-0.166	-0.258	FALSE	-0.042	-0.853	FALSE
9210	BMP15	-0.272	0.002	FALSE	-0.186	0.009	FALSE	-0.145	0.064	FALSE	-0.079	0.09	FALSE	-0.023	0.169	FALSE
650	BMP2	-0.358	-0.166	FALSE	-0.278	-0.162	FALSE	-0.238	-0.129	FALSE	-0.19	-0.148	FALSE	-0.123	-0.113	FALSE
55589	BMP2K	-0.436	0.238	FALSE	-0.311	0.093	FALSE	-0.227	0.08	FALSE	-0.17	0.142	FALSE	-0.065	0.145	FALSE
651	BMP3	-0.368	-0.056	FALSE	-0.307	-0.015	FALSE	-0.249	-0.04	FALSE	-0.19	-0.08	FALSE	-0.09	-0.271	FALSE
652	BMP4	-0.503	-0.003	FALSE	-0.443	0.013	FALSE	-0.358	0.025	FALSE	-0.295	0.058	FALSE	-0.209	0.117	FALSE
653	BMP5	-0.19	-0.083	FALSE	-0.156	-0.045	FALSE	-0.133	0.003	FALSE	-0.09	-0.003	FALSE	-0.026	0.053	FALSE
654	BMP6	-0.582	-0.03	TRUE	-0.497	-0.019	TRUE	-0.434	-0.03	TRUE	-0.342	-0.065	TRUE	-0.219	-0.188	TRUE
353500	BMP8A	-0.415	-0.14	FALSE	-0.351	-0.122	FALSE	-0.292	-0.108	FALSE	-0.246	-0.097	FALSE	-0.144	-0.187	FALSE
656	BMP8B	-0.368	0.079	FALSE	-0.294	0.163	FALSE	-0.252	0.151	FALSE	-0.181	0.16	FALSE	-0.076	0.003	FALSE
168667	BMPER	-0.399	-0.016	FALSE	-0.34	-0.001	FALSE	-0.258	0.008	FALSE	-0.197	0.049	FALSE	-0.107	0.113	FALSE
657	BMPR1A	-0.489	0.034	FALSE	-0.427	0.079	FALSE	-0.342	0.034	FALSE	-0.265	-0.013	FALSE	-0.163	-0.106	FALSE
658	BMPR1B	-0.567	-0.043	TRUE	-0.489	-0.018	TRUE	-0.387	-0.07	TRUE	-0.332	-0.037	TRUE	-0.236	-0.044	TRUE
659	BMPR2	-0.346	0.019	FALSE	-0.25	-0.043	FALSE	-0.185	-0.041	FALSE	-0.143	-0.033	FALSE	-0.061	0.031	FALSE
9790	BMS1	-0.724	-0.211	TRUE	-0.685	-0.149	TRUE	-0.645	-0.104	TRUE	-0.573	-0.152	TRUE	-0.456	-0.268	TRUE
154743	BMT2	-0.379	-0.082	FALSE	-0.264	-0.204	FALSE	-0.209	-0.232	FALSE	-0.138	-0.392	FALSE	-0.043	-0.795	FALSE
660	BMX	-0.493	0.119	FALSE	-0.361	0.177	FALSE	-0.291	0.176	FALSE	-0.237	0.199	FALSE	-0.129	0.127	FALSE
646	BNC1	-0.413	-0.096	FALSE	-0.325	-0.1	FALSE	-0.256	-0.084	FALSE	-0.17	-0.111	FALSE	-0.095	-0.103	FALSE
54796	BNC2	-0.417	0.081	FALSE	-0.332	0.102	FALSE	-0.25	0.108	FALSE	-0.192	0.11	FALSE	-0.078	-0.069	FALSE
662	BNIP1	-0.267	0.028	FALSE	-0.23	0.056	FALSE	-0.183	0.092	FALSE	-0.13	0.147	FALSE	-0.038	0.239	FALSE
663	BNIP2	-0.266	0.095	FALSE	-0.201	0.129	FALSE	-0.144	0.233	FALSE	-0.074	0.26	FALSE	-0.028	0.586	FALSE
664	BNIP3	-0.388	-0.004	FALSE	-0.345	0.023	FALSE	-0.292	0.054	FALSE	-0.245	0.063	FALSE	-0.145	0.103	FALSE
149428	BNIPL	-0.418	0.147	FALSE	-0.288	0.165	FALSE	-0.225	0.157	FALSE	-0.145	0.087	FALSE	-0.058	-0.049	FALSE
91653	BOC	-0.249	0.064	FALSE	-0.167	0.07	FALSE	-0.122	0.094	FALSE	-0.072	0.188	FALSE	-0.026	0.272	FALSE
666	BOK	-0.246	-0.074	FALSE	-0.208	-0.024	FALSE	-0.147	-0.007	FALSE	-0.099	0.056	FALSE	-0.027	0.049	FALSE
51027	BOLA1	-0.241	0.205	FALSE	-0.19	0.16	FALSE	-0.122	0.072	FALSE	-0.087	0.115	FALSE	-0.037	0.139	FALSE
388962	BOLA3	-0.555	0.111	TRUE	-0.458	0.166	TRUE	-0.287	0.066	TRUE	-0.207	0.07	TRUE	-0.033	-0.704	TRUE
66037	BOLL	-0.352	-0.026	FALSE	-0.25	-0.033	FALSE	-0.189	-0.054	FALSE	-0.127	-0.092	FALSE	-0.045	-0.294	FALSE
23246	BOP1	-1.427	-0.095	TRUE	-1.281	-0.074	TRUE	-1.156	-0.104	TRUE	-1.061	-0.104	TRUE	-0.913	-0.088	TRUE
79866	BORA	-0.535	0.077	FALSE	-0.484	0.181	FALSE	-0.418	0.245	FALSE	-0.393	0.366	FALSE	-0.32	0.862	FALSE
118426	BORCS5	-0.327	-0.262	FALSE	-0.275	-0.262	FALSE	-0.23	-0.29	FALSE	-0.169	-0.369	FALSE	-0.097	-0.627	FALSE
119032	BORCS7	-0.192	0.11	FALSE	-0.142	0.133	FALSE	-0.108	0.163	FALSE	-0.081	0.173	FALSE	-0.046	0.263	FALSE
669	BPGM	-0.225	0.258	FALSE	-0.178	0.249	FALSE	-0.139	0.24	FALSE	-0.067	0.358	FALSE	0.016	0.473	FALSE
670	BPHL	-0.397	0.026	FALSE	-0.334	0.025	FALSE	-0.263	-0.162	FALSE	-0.188	-0.19	FALSE	-0.115	-0.29	FALSE
671	BPI	-0.294	-0.033	FALSE	-0.185	-0.109	FALSE	-0.141	-0.136	FALSE	-0.077	-0.236	FALSE	-0.024	-0.764	FALSE
51297	BPIFA1	-0.21	-0.185	FALSE	-0.111	-0.264	FALSE	-0.071	-0.303	FALSE	-0.025	-0.404	FALSE	-0.021	-0.436	FALSE
140683	BPIFA2	-0.31	-0.131	FALSE	-0.257	-0.113	FALSE	-0.196	-0.154	FALSE	-0.118	-0.282	FALSE	-0.022	-0.898	FALSE
128861	BPIFA3	-0.599	-0.262	TRUE	-0.518	-0.243	TRUE	-0.411	-0.268	TRUE	-0.313	-0.244	TRUE	-0.174	-0.163	TRUE
92747	BPIFB1	-0.759	-0.215	TRUE	-0.655	-0.16	TRUE	-0.59	-0.081	TRUE	-0.474	-0.002	TRUE	-0.344	0.421	TRUE
359710	BPIFB3	-0.365	0	FALSE	-0.298	0.054	FALSE	-0.21	-0.004	FALSE	-0.138	-0.085	FALSE	-0.046	-0.499	FALSE
128859	BPIFB6	-0.423	0.089	FALSE	-0.264	0.084	FALSE	-0.183	0.07	FALSE	-0.074	-0.018	FALSE	-0.026	-0.274	FALSE
254240	BPIFC	-0.225	-0.189	FALSE	-0.156	-0.209	FALSE	-0.12	-0.28	FALSE	-0.06	-0.345	FALSE	-0.024	-0.597	FALSE
10380	BPNT1	-0.422	0.061	FALSE	-0.307	0.078	FALSE	-0.228	0.097	FALSE	-0.159	0.105	FALSE	-0.067	0.11	FALSE
2186	BPTF	-0.754	0.014	TRUE	-0.706	0.034	TRUE	-0.66	0.071	TRUE	-0.594	0.174	TRUE	-0.392	0.2	TRUE
673	BRAF	-1.27	0.248	TRUE	-1.071	0.348	TRUE	-0.6	0.277	TRUE	-0.225	0.08	TRUE	-0.075	-0.04	TRUE
8315	BRAP	-0.543	-0.038	FALSE	-0.407	-0.047	FALSE	-0.329	-0.011	FALSE	-0.224	-0.015	FALSE	-0.113	0.035	FALSE
672	BRCA1	-0.687	0.019	TRUE	-0.52	-0.031	TRUE	-0.457	0.005	TRUE	-0.366	0.002	TRUE	-0.26	0.084	TRUE
675	BRCA2	-0.572	-0.182	TRUE	-0.511	-0.152	TRUE	-0.47	-0.11	TRUE	-0.383	-0.141	TRUE	-0.293	-0.123	TRUE
79184	BRCC3	-0.303	-0.071	FALSE	-0.253	-0.03	FALSE	-0.132	-0.164	FALSE	-0.103	-0.13	FALSE	-0.029	-0.125	FALSE
23774	BRD1	-0.426	0.139	FALSE	-0.312	0.173	FALSE	-0.255	0.09	FALSE	-0.192	0.117	FALSE	-0.114	0.203	FALSE
6046	BRD2	-0.553	0.115	TRUE	-0.488	0.142	TRUE	-0.426	0.121	TRUE	-0.331	0.129	TRUE	-0.217	0.164	TRUE
8019	BRD3	-0.303	-0.03	FALSE	-0.247	0.01	FALSE	-0.2	0.032	FALSE	-0.14	0.04	FALSE	-0.035	0.008	FALSE
23476	BRD4	-1.24	-0.004	TRUE	-1.074	-0.019	TRUE	-1.011	-0.036	TRUE	-0.942	-0.031	TRUE	-0.766	-0.113	TRUE
29117	BRD7	-0.688	0.041	TRUE	-0.549	-0.061	TRUE	-0.443	-0.054	TRUE	-0.353	-0.129	TRUE	-0.243	0.002	TRUE
10902	BRD8	-0.4	0.096	FALSE	-0.339	0.074	FALSE	-0.279	0.092	FALSE	-0.21	0.115	FALSE	-0.11	0.09	FALSE
65980	BRD9	-0.471	0.051	FALSE	-0.361	0.012	FALSE	-0.26	-0.026	FALSE	-0.18	-0.045	FALSE	-0.077	-0.088	FALSE
676	BRDT	-0.34	-0.229	FALSE	-0.261	-0.201	FALSE	-0.227	-0.185	FALSE	-0.185	-0.235	FALSE	-0.127	-0.176	FALSE
2972	BRF1	-0.623	-0.043	TRUE	-0.489	-0.13	TRUE	-0.438	-0.109	TRUE	-0.374	-0.138	TRUE	-0.303	-0.075	TRUE
55290	BRF2	-0.651	0.28	TRUE	-0.614	0.42	TRUE	-0.581	0.431	TRUE	-0.53	0.562	TRUE	-0.284	0.953	TRUE
25798	BRI3	-0.434	0.053	FALSE	-0.362	0.068	FALSE	-0.312	0.148	FALSE	-0.213	0.151	FALSE	-0.105	0.28	FALSE
57795	BRINP2	-0.21	-0.011	FALSE	-0.182	0.025	FALSE	-0.116	0.046	FALSE	-0.045	-0.112	FALSE	-0.028	-0.186	FALSE
339479	BRINP3	-0.357	-0.118	FALSE	-0.317	-0.185	FALSE	-0.251	-0.28	FALSE	-0.175	-0.402	FALSE	-0.083	-0.598	FALSE
83990	BRIP1	-0.367	-0.051	FALSE	-0.296	-0.1	FALSE	-0.261	-0.088	FALSE	-0.188	-0.07	FALSE	-0.091	-0.063	FALSE
55299	BRIX1	-0.901	-0.13	TRUE	-0.806	-0.08	TRUE	-0.712	-0.083	TRUE	-0.609	-0.118	TRUE	-0.478	-0.128	TRUE
55845	BRK1	-0.434	-0.056	FALSE	-0.37	-0.047	FALSE	-0.291	-0.084	FALSE	-0.254	-0.077	FALSE	-0.173	-0.224	FALSE
25855	BRMS1	-0.61	0.2	TRUE	-0.487	0.2	TRUE	-0.401	0.228	TRUE	-0.305	0.27	TRUE	-0.18	0.291	TRUE
84312	BRMS1L	-0.506	-0.16	FALSE	-0.438	-0.148	FALSE	-0.346	-0.171	FALSE	-0.276	-0.158	FALSE	-0.178	-0.148	FALSE
148362	BROX	-0.114	-0.105	FALSE	-0.055	-0.11	FALSE	-0.025	-0.155	FALSE	-0.023	-0.083	FALSE	-0.021	0.13	FALSE
7862	BRPF1	-0.389	-0.176	FALSE	-0.313	-0.159	FALSE	-0.277	-0.09	FALSE	-0.214	-0.072	FALSE	-0.118	-0.075	FALSE
27154	BRPF3	-0.31	-0.121	FALSE	-0.257	-0.153	FALSE	-0.229	-0.11	FALSE	-0.16	-0.121	FALSE	-0.098	-0.06	FALSE
680	BRS3	-0.407	0.05	FALSE	-0.312	0.008	FALSE	-0.284	-0.014	FALSE	-0.236	0.004	FALSE	-0.16	0.027	FALSE
84446	BRSK1	-0.225	0.073	FALSE	-0.144	0.073	FALSE	-0.065	0.025	FALSE	-0.022	0.051	FALSE	0.04	0.255	FALSE
9024	BRSK2	-0.617	-0.089	TRUE	-0.529	-0.06	TRUE	-0.466	-0.054	TRUE	-0.422	-0.016	TRUE	-0.302	-0.019	TRUE
54014	BRWD1	-0.339	0.008	FALSE	-0.232	-0.038	FALSE	-0.179	-0.07	FALSE	-0.132	-0.032	FALSE	-0.062	-0.054	FALSE
254065	BRWD3	-0.529	-0.009	FALSE	-0.431	-0.015	FALSE	-0.36	-0.012	FALSE	-0.269	-0.015	FALSE	-0.165	-0.024	FALSE
26580	BSCL2	-0.371	0.039	FALSE	-0.264	0.009	FALSE	-0.195	-0.05	FALSE	-0.132	-0.275	FALSE	-0.066	-0.678	FALSE
55108	BSDC1	-0.409	-0.158	FALSE	-0.353	-0.172	FALSE	-0.305	-0.204	FALSE	-0.222	-0.346	FALSE	-0.114	-0.439	FALSE
682	BSG	-0.509	0.025	FALSE	-0.432	0.038	FALSE	-0.358	0.018	FALSE	-0.282	0.064	FALSE	-0.179	0.046	FALSE
8927	BSN	-0.619	-0.071	TRUE	-0.483	-0.144	TRUE	-0.383	-0.2	TRUE	-0.296	-0.256	TRUE	-0.149	-0.257	TRUE
7809	BSND	-0.257	-0.046	FALSE	-0.226	0.032	FALSE	-0.126	0.043	FALSE	-0.064	0.057	FALSE	-0.029	0.304	FALSE
54836	BSPRY	-0.316	0.013	FALSE	-0.266	0.037	FALSE	-0.207	-0.029	FALSE	-0.125	-0.176	FALSE	-0.03	-0.78	FALSE
683	BST1	-0.334	0.176	FALSE	-0.267	0.21	FALSE	-0.212	0.192	FALSE	-0.128	0.224	FALSE	-0.023	0.118	FALSE
684	BST2	-0.549	0.232	TRUE	-0.469	0.224	TRUE	-0.394	0.29	TRUE	-0.295	0.325	TRUE	-0.149	0.171	TRUE
9044	BTAF1	-0.404	-0.008	FALSE	-0.354	0.021	FALSE	-0.29	0.029	FALSE	-0.216	0.044	FALSE	-0.113	0.167	FALSE
53339	BTBD1	-0.204	0.107	FALSE	-0.154	0.062	FALSE	-0.105	0.134	FALSE	-0.052	0.181	FALSE	-0.024	0.457	FALSE
84280	BTBD10	-0.137	0.39	FALSE	-0.058	0.478	FALSE	-0.046	0.507	FALSE	-0.033	0.752	FALSE	-0.027	1.153	FALSE
121551	BTBD11	-0.369	-0.114	FALSE	-0.292	-0.042	FALSE	-0.224	-0.072	FALSE	-0.176	-0.077	FALSE	-0.101	-0.142	FALSE
118663	BTBD16	-0.421	-0.119	FALSE	-0.343	-0.134	FALSE	-0.296	-0.247	FALSE	-0.222	-0.325	FALSE	-0.09	-0.547	FALSE
388419	BTBD17	-0.3	-0.184	FALSE	-0.219	-0.221	FALSE	-0.179	-0.222	FALSE	-0.117	-0.278	FALSE	-0.069	-0.398	FALSE
643376	BTBD18	-0.495	0.027	FALSE	-0.322	-0.203	FALSE	-0.24	-0.255	FALSE	-0.183	-0.317	FALSE	-0.072	-0.658	FALSE
55643	BTBD2	-0.349	-0.247	FALSE	-0.281	-0.21	FALSE	-0.252	-0.158	FALSE	-0.196	-0.179	FALSE	-0.087	-0.282	FALSE
22903	BTBD3	-0.211	-0.18	FALSE	-0.152	-0.159	FALSE	-0.11	-0.151	FALSE	-0.078	-0.134	FALSE	-0.026	-0.118	FALSE
90135	BTBD6	-0.611	-0.076	TRUE	-0.525	-0.066	TRUE	-0.473	-0.086	TRUE	-0.407	-0.103	TRUE	-0.3	-0.178	TRUE
55727	BTBD7	-0.679	0.16	TRUE	-0.592	0.103	TRUE	-0.515	0.147	TRUE	-0.388	0.092	TRUE	-0.238	0.098	TRUE
284697	BTBD8	-0.365	-0.075	FALSE	-0.266	-0.06	FALSE	-0.192	-0.076	FALSE	-0.141	-0.171	FALSE	-0.066	-0.219	FALSE
114781	BTBD9	-0.432	-0.003	FALSE	-0.355	-0.015	FALSE	-0.29	-0.001	FALSE	-0.228	0.039	FALSE	-0.113	-0.101	FALSE
685	BTC	-0.289	-0.102	FALSE	-0.239	-0.07	FALSE	-0.165	-0.208	FALSE	-0.1	-0.249	FALSE	-0.024	-0.609	FALSE
686	BTD	-0.651	0.029	TRUE	-0.56	0.031	TRUE	-0.497	0.033	TRUE	-0.405	0.041	TRUE	-0.284	0.129	TRUE
689	BTF3	-1.196	-0.043	TRUE	-1.04	-0.032	TRUE	-0.992	-0.026	TRUE	-0.885	-0.034	TRUE	-0.739	-0.112	TRUE
91408	BTF3L4	-0.605	0.221	TRUE	-0.566	0.328	TRUE	-0.437	0.346	TRUE	-0.326	0.423	TRUE	-0.197	0.568	TRUE
694	BTG1	-0.297	0.077	FALSE	-0.255	0.091	FALSE	-0.211	0.067	FALSE	-0.143	0.132	FALSE	-0.043	0.205	FALSE
7832	BTG2	-0.568	0.035	TRUE	-0.419	0.001	TRUE	-0.343	0.046	TRUE	-0.275	0.088	TRUE	-0.165	-0.036	TRUE
10950	BTG3	-0.266	-0.238	FALSE	-0.187	-0.269	FALSE	-0.137	-0.267	FALSE	-0.084	-0.338	FALSE	-0.025	-0.739	FALSE
54766	BTG4	-0.071	-0.006	FALSE	-0.046	0.084	FALSE	-0.026	0.055	FALSE	-0.024	0.194	FALSE	-0.022	0.189	FALSE
695	BTK	-0.499	0.207	FALSE	-0.439	0.283	FALSE	-0.344	0.282	FALSE	-0.243	0.327	FALSE	-0.12	0.363	FALSE
151888	BTLA	-0.568	-0.152	TRUE	-0.46	-0.186	TRUE	-0.367	-0.221	TRUE	-0.29	-0.255	TRUE	-0.161	-0.19	TRUE
696	BTN1A1	-0.442	0.012	FALSE	-0.365	0.038	FALSE	-0.3	-0.034	FALSE	-0.24	-0.039	FALSE	-0.154	-0.017	FALSE
11120	BTN2A1	-0.339	0.145	FALSE	-0.296	0.069	FALSE	-0.262	0.132	FALSE	-0.155	0.201	FALSE	-0.068	0.045	FALSE
10385	BTN2A2	-0.248	0	FALSE	-0.198	-0.06	FALSE	-0.147	-0.095	FALSE	-0.102	-0.14	FALSE	-0.036	-0.225	FALSE
11119	BTN3A1	-0.275	-0.053	FALSE	-0.159	-0.079	FALSE	-0.106	-0.11	FALSE	-0.062	-0.117	FALSE	-0.021	-0.068	FALSE
11118	BTN3A2	-0.388	0.145	FALSE	-0.331	0.126	FALSE	-0.273	0.137	FALSE	-0.188	0.152	FALSE	-0.093	0.18	FALSE
10384	BTN3A3	-0.288	0.106	FALSE	-0.25	0.159	FALSE	-0.198	0.181	FALSE	-0.124	0.234	FALSE	-0.028	0.339	FALSE
10917	BTNL3	-0.321	-0.017	FALSE	-0.253	-0.014	FALSE	-0.199	-0.032	FALSE	-0.144	0.004	FALSE	-0.066	0.031	FALSE
79908	BTNL8	-0.569	-0.081	TRUE	-0.488	-0.146	TRUE	-0.422	-0.149	TRUE	-0.354	-0.173	TRUE	-0.26	0.088	TRUE
153579	BTNL9	-0.457	-0.044	FALSE	-0.351	-0.006	FALSE	-0.298	-0.047	FALSE	-0.226	-0.069	FALSE	-0.131	-0.203	FALSE
8945	BTRC	-0.6	0.159	TRUE	-0.524	0.174	TRUE	-0.454	0.16	TRUE	-0.394	0.247	TRUE	-0.273	0.351	TRUE
699	BUB1	-0.962	0.11	TRUE	-0.812	0.126	TRUE	-0.727	0.168	TRUE	-0.628	0.211	TRUE	-0.446	0.131	TRUE
701	BUB1B	-2.155	0.043	TRUE	-1.764	-0.003	TRUE	-1.537	-0.047	TRUE	-1.42	-0.035	TRUE	-1.13	-0.264	TRUE
9184	BUB3	-1.127	-0.013	TRUE	-0.996	-0.007	TRUE	-0.945	-0.002	TRUE	-0.86	0.022	TRUE	-0.717	0.009	TRUE
84811	BUD13	-0.829	0.121	TRUE	-0.691	0.158	TRUE	-0.568	0.142	TRUE	-0.446	0.144	TRUE	-0.285	0.13	TRUE
114049	BUD23	-0.817	-0.013	TRUE	-0.737	0.037	TRUE	-0.655	0.059	TRUE	-0.551	0.083	TRUE	-0.434	0.188	TRUE
8896	BUD31	-1.403	-0.108	TRUE	-1.277	-0.116	TRUE	-1.242	-0.09	TRUE	-1.13	-0.094	TRUE	-0.953	-0.114	TRUE
11149	BVES	-0.328	0	FALSE	-0.223	0.029	FALSE	-0.14	-0.052	FALSE	-0.069	-0.203	FALSE	-0.026	-0.385	FALSE
705	BYSL	-0.796	0.165	TRUE	-0.682	0.182	TRUE	-0.583	0.219	TRUE	-0.52	0.287	TRUE	-0.442	0.137	TRUE
9689	BZW1	-0.42	0.047	FALSE	-0.299	-0.017	FALSE	-0.251	0.005	FALSE	-0.187	-0.153	FALSE	-0.046	-0.797	FALSE
28969	BZW2	-0.302	0.297	FALSE	-0.148	0.22	FALSE	-0.07	0.202	FALSE	-0.028	0.183	FALSE	-0.022	0.043	FALSE
387638	C10orf113	-0.894	-0.004	TRUE	-0.732	-0.042	TRUE	-0.579	-0.069	TRUE	-0.446	-0.016	TRUE	-0.272	0.243	TRUE
399814	C10orf120	-0.403	-0.113	FALSE	-0.341	-0.143	FALSE	-0.284	-0.132	FALSE	-0.18	-0.329	FALSE	-0.078	-0.606	FALSE
282966	C10orf53	-0.151	0.012	FALSE	-0.108	-0.032	FALSE	-0.072	0.026	FALSE	-0.048	0.041	FALSE	-0.03	-0.03	FALSE
118461	C10orf71	-0.277	0.088	FALSE	-0.173	0.135	FALSE	-0.12	0.198	FALSE	-0.02	0.116	FALSE	-0.015	0.04	FALSE
387695	C10orf99	-0.22	-0.195	FALSE	-0.153	-0.228	FALSE	-0.116	-0.369	FALSE	-0.079	-0.501	FALSE	-0.027	-0.917	FALSE
56673	C11orf16	-0.33	-0.09	FALSE	-0.25	-0.136	FALSE	-0.172	-0.232	FALSE	-0.118	-0.305	FALSE	-0.025	-0.896	FALSE
53838	C11orf24	-0.552	-0.014	TRUE	-0.485	0.025	TRUE	-0.427	0.077	TRUE	-0.338	0.066	TRUE	-0.227	-0.03	TRUE
143501	C11orf40	-0.437	-0.236	FALSE	-0.33	-0.315	FALSE	-0.294	-0.334	FALSE	-0.243	-0.369	FALSE	-0.129	-0.359	FALSE
160298	C11orf42	-0.327	-0.068	FALSE	-0.301	-0.086	FALSE	-0.235	-0.12	FALSE	-0.157	-0.18	FALSE	-0.032	-0.889	FALSE
219833	C11orf45	-0.562	0.278	TRUE	-0.414	0.219	TRUE	-0.333	0.217	TRUE	-0.271	0.279	TRUE	-0.13	0.034	TRUE
79096	C11orf49	-0.647	0.147	TRUE	-0.603	0.138	TRUE	-0.495	0.114	TRUE	-0.338	-0.016	TRUE	-0.095	-0.528	TRUE
10944	C11orf58	-0.18	-0.263	FALSE	-0.133	-0.262	FALSE	-0.101	-0.307	FALSE	-0.048	-0.341	FALSE	-0.029	-0.497	FALSE
54494	C11orf71	-0.562	0.207	TRUE	-0.434	0.285	TRUE	-0.325	0.297	TRUE	-0.213	0.304	TRUE	-0.071	0.265	TRUE
119710	C11orf74	-0.245	0.119	FALSE	-0.151	0.142	FALSE	-0.104	0.205	FALSE	-0.027	0.248	FALSE	-0.022	0.334	FALSE
79703	C11orf80	-0.286	-0.029	FALSE	-0.22	-0.036	FALSE	-0.139	-0.122	FALSE	-0.092	-0.147	FALSE	-0.032	-0.413	FALSE
60314	C12orf10	-0.184	-0.063	FALSE	-0.143	-0.085	FALSE	-0.119	-0.039	FALSE	-0.084	0.072	FALSE	-0.058	0.198	FALSE
57102	C12orf4	-0.171	-0.038	FALSE	-0.099	-0.084	FALSE	-0.059	-0.086	FALSE	-0.026	-0.138	FALSE	-0.023	-0.152	FALSE
283461	C12orf40	-0.337	-0.162	FALSE	-0.213	-0.27	FALSE	-0.166	-0.283	FALSE	-0.103	-0.386	FALSE	-0.023	-0.888	FALSE
64897	C12orf43	-0.324	-0.244	FALSE	-0.081	-0.754	FALSE	-0.042	-0.936	FALSE	-0.031	-0.963	FALSE	-0.026	-0.973	FALSE
121053	C12orf45	-0.923	-0.022	TRUE	-0.716	-0.056	TRUE	-0.637	-0.06	TRUE	-0.483	-0.113	TRUE	-0.281	-0.272	TRUE
79794	C12orf49	-0.412	0.158	FALSE	-0.278	0.113	FALSE	-0.189	0.072	FALSE	-0.124	0.105	FALSE	-0.052	0.252	FALSE
121273	C12orf54	-0.23	-0.059	FALSE	-0.134	-0.052	FALSE	-0.096	-0.037	FALSE	-0.047	-0.059	FALSE	-0.023	-0.257	FALSE
144608	C12orf60	-0.357	0.038	FALSE	-0.236	-0.001	FALSE	-0.165	-0.033	FALSE	-0.075	-0.135	FALSE	-0.023	-0.424	FALSE
144577	C12orf66	-0.333	-0.005	FALSE	-0.239	-0.01	FALSE	-0.199	0.008	FALSE	-0.126	-0.066	FALSE	-0.024	-0.57	FALSE
55017	C14orf119	-0.478	-0.068	FALSE	-0.386	-0.026	FALSE	-0.279	-0.054	FALSE	-0.173	-0.175	FALSE	-0.043	-0.838	FALSE
122525	C14orf28	-0.299	-0.044	FALSE	-0.216	-0.073	FALSE	-0.16	-0.075	FALSE	-0.103	-0.11	FALSE	-0.032	-0.569	FALSE
317761	C14orf39	-0.264	-0.15	FALSE	-0.255	-0.087	FALSE	-0.187	-0.094	FALSE	-0.136	-0.141	FALSE	-0.035	-0.313	FALSE
60686	C14orf93	-0.339	0.008	FALSE	-0.257	-0.012	FALSE	-0.199	-0.049	FALSE	-0.135	-0.071	FALSE	-0.031	-0.294	FALSE
56905	C15orf39	-0.25	0.072	FALSE	-0.154	0.045	FALSE	-0.092	0.08	FALSE	-0.041	0.103	FALSE	-0.027	0.029	FALSE
84419	C15orf48	-0.382	0.143	FALSE	-0.282	0.069	FALSE	-0.182	-0.006	FALSE	-0.116	-0.121	FALSE	-0.024	-0.887	FALSE
145853	C15orf61	-0.427	-0.144	FALSE	-0.345	-0.131	FALSE	-0.242	-0.222	FALSE	-0.175	-0.385	FALSE	-0.061	-0.669	FALSE
145788	C15orf65	-0.431	-0.061	FALSE	-0.312	-0.11	FALSE	-0.223	-0.143	FALSE	-0.161	-0.202	FALSE	-0.04	-0.62	FALSE
89927	BMERB1	-0.109	-0.056	FALSE	-0.054	-0.056	FALSE	-0.036	0.022	FALSE	-0.028	0.077	FALSE	-0.024	0.314	FALSE
123775	C16orf46	-0.346	-0.184	FALSE	-0.279	-0.194	FALSE	-0.222	-0.234	FALSE	-0.167	-0.309	FALSE	-0.073	-0.684	FALSE
64755	C16orf58	-0.343	0.134	FALSE	-0.252	0.078	FALSE	-0.168	-0.042	FALSE	-0.088	-0.192	FALSE	-0.023	-0.636	FALSE
146562	C16orf71	-0.767	0.063	TRUE	-0.641	0.062	TRUE	-0.522	-0.046	TRUE	-0.382	-0.117	TRUE	-0.222	0.051	TRUE
123970	C16orf78	-0.35	-0.12	FALSE	-0.298	-0.038	FALSE	-0.218	-0.049	FALSE	-0.13	-0.177	FALSE	-0.025	-0.852	FALSE
388272	C16orf87	-0.495	-0.335	FALSE	-0.453	-0.337	FALSE	-0.428	-0.255	FALSE	-0.37	-0.165	FALSE	-0.279	-0.217	FALSE
146556	C16orf89	-0.488	-0.24	FALSE	-0.394	-0.276	FALSE	-0.352	-0.32	FALSE	-0.248	-0.368	FALSE	-0.155	-0.253	FALSE
339263	LINC02693	-0.145	-0.151	FALSE	-0.102	-0.097	FALSE	-0.071	-0.097	FALSE	-0.033	-0.05	FALSE	-0.023	0.26	FALSE
284018	C17orf58	-0.36	-0.087	FALSE	-0.308	-0.029	FALSE	-0.236	-0.008	FALSE	-0.181	-0.038	FALSE	-0.102	-0.042	FALSE
124773	C17orf64	-0.246	-0.044	FALSE	-0.185	-0.073	FALSE	-0.13	-0.163	FALSE	-0.086	-0.245	FALSE	-0.021	-0.698	FALSE
64149	C17orf75	-0.283	0.03	FALSE	-0.249	0.003	FALSE	-0.2	-0.032	FALSE	-0.156	0.019	FALSE	-0.078	0.065	FALSE
284099	C17orf78	-0.235	0.098	FALSE	-0.165	0.096	FALSE	-0.073	0.095	FALSE	-0.026	0.045	FALSE	-0.022	0.001	FALSE
55028	C17orf80	-0.211	-0.153	FALSE	-0.132	-0.179	FALSE	-0.081	-0.157	FALSE	-0.054	-0.158	FALSE	-0.021	-0.079	FALSE
100141515	C17orf99	-0.59	0.053	TRUE	-0.44	0.036	TRUE	-0.314	-0.011	TRUE	-0.223	-0.015	TRUE	-0.091	-0.135	TRUE
147339	C18orf25	-0.523	-0.079	FALSE	-0.42	-0.089	FALSE	-0.296	-0.153	FALSE	-0.212	-0.218	FALSE	-0.071	-0.646	FALSE
83636	C19orf12	-0.444	-0.22	FALSE	-0.351	-0.217	FALSE	-0.317	-0.204	FALSE	-0.257	-0.23	FALSE	-0.161	-0.198	FALSE
147685	C19orf18	-0.485	-0.088	FALSE	-0.35	-0.097	FALSE	-0.309	-0.084	FALSE	-0.213	-0.201	FALSE	-0.069	-0.667	FALSE
28974	C19orf53	-0.491	-0.237	FALSE	-0.423	-0.242	FALSE	-0.386	-0.207	FALSE	-0.332	-0.181	FALSE	-0.265	-0.086	FALSE
10438	C1D	-0.524	-0.255	FALSE	-0.443	-0.265	FALSE	-0.413	-0.258	FALSE	-0.331	-0.259	FALSE	-0.221	-0.263	FALSE
56913	C1GALT1	-0.553	0.028	TRUE	-0.483	-0.042	TRUE	-0.431	-0.037	TRUE	-0.324	-0.104	TRUE	-0.224	0.049	TRUE
29071	C1GALT1C1	-0.517	-0.065	FALSE	-0.469	-0.064	FALSE	-0.377	-0.075	FALSE	-0.329	-0.097	FALSE	-0.206	-0.004	FALSE
712	C1QA	-0.422	0.097	FALSE	-0.336	0.106	FALSE	-0.243	0.074	FALSE	-0.189	0.096	FALSE	-0.076	0.062	FALSE
713	C1QB	-0.514	0.029	FALSE	-0.416	0.06	FALSE	-0.334	0.091	FALSE	-0.283	0.09	FALSE	-0.17	0.096	FALSE
708	C1QBP	-0.607	-0.09	TRUE	-0.495	-0.228	TRUE	-0.454	-0.221	TRUE	-0.401	-0.235	TRUE	-0.299	-0.29	TRUE
714	C1QC	-0.496	0.048	FALSE	-0.435	0.112	FALSE	-0.33	0.027	FALSE	-0.273	0.03	FALSE	-0.174	0.094	FALSE
10882	C1QL1	-0.38	-0.18	FALSE	-0.296	-0.213	FALSE	-0.239	-0.242	FALSE	-0.194	-0.218	FALSE	-0.106	-0.361	FALSE
165257	C1QL2	-0.224	0.018	FALSE	-0.169	-0.003	FALSE	-0.127	0.021	FALSE	-0.063	0.039	FALSE	-0.021	0.252	FALSE
389941	C1QL3	-0.385	-0.1	FALSE	-0.302	-0.055	FALSE	-0.245	-0.061	FALSE	-0.188	-0.082	FALSE	-0.091	-0.184	FALSE
338761	C1QL4	-0.538	-0.163	FALSE	-0.442	-0.164	FALSE	-0.377	-0.207	FALSE	-0.282	-0.278	FALSE	-0.159	-0.207	FALSE
114897	C1QTNF1	-0.496	-0.028	FALSE	-0.42	0.001	FALSE	-0.383	0.032	FALSE	-0.31	-0.005	FALSE	-0.192	-0.099	FALSE
388581	C1QTNF12	-0.483	-0.221	FALSE	-0.341	-0.278	FALSE	-0.294	-0.288	FALSE	-0.241	-0.365	FALSE	-0.156	-0.223	FALSE
114898	C1QTNF2	-0.441	-0.152	FALSE	-0.4	-0.116	FALSE	-0.315	-0.148	FALSE	-0.254	-0.143	FALSE	-0.142	-0.274	FALSE
114899	C1QTNF3	-0.191	-0.016	FALSE	-0.139	0.047	FALSE	-0.094	0.034	FALSE	-0.05	0.077	FALSE	-0.02	0.429	FALSE
114904	C1QTNF6	-0.631	0.023	TRUE	-0.498	0.012	TRUE	-0.424	-0.016	TRUE	-0.33	-0.058	TRUE	-0.201	-0.051	TRUE
114905	C1QTNF7	-0.339	-0.201	FALSE	-0.317	-0.19	FALSE	-0.226	-0.224	FALSE	-0.156	-0.246	FALSE	-0.088	-0.33	FALSE
390664	C1QTNF8	-0.436	0.212	FALSE	-0.27	-0.003	FALSE	-0.194	-0.112	FALSE	-0.134	-0.076	FALSE	-0.044	-0.122	FALSE
338872	C1QTNF9	-0.493	-0.038	FALSE	-0.395	-0.042	FALSE	-0.328	-0.032	FALSE	-0.261	-0.044	FALSE	-0.16	-0.113	FALSE
387911	C1QTNF9B	-0.459	0.103	FALSE	-0.37	0.143	FALSE	-0.313	0.133	FALSE	-0.243	0.118	FALSE	-0.134	0.061	FALSE
51279	C1RL	-0.307	0.149	FALSE	-0.252	0.185	FALSE	-0.203	0.158	FALSE	-0.135	0.137	FALSE	-0.038	0.037	FALSE
716	C1S	-0.598	0.11	TRUE	-0.48	-0.01	TRUE	-0.389	-0.06	TRUE	-0.318	-0.044	TRUE	-0.21	-0.026	TRUE
200159	C1orf100	-0.302	0.217	FALSE	-0.209	0.217	FALSE	-0.139	0.148	FALSE	-0.087	0.104	FALSE	-0.055	0.028	FALSE
92346	C1orf105	-0.142	0.274	FALSE	-0.089	0.337	FALSE	-0.05	0.409	FALSE	-0.034	0.583	FALSE	-0.027	0.852	FALSE
54955	C1orf109	-0.914	0.153	TRUE	-0.886	0.232	TRUE	-0.824	0.247	TRUE	-0.78	0.364	TRUE	-0.682	0.638	TRUE
79762	C1orf115	-0.208	0.067	FALSE	-0.152	-0.092	FALSE	-0.106	-0.144	FALSE	-0.032	-0.192	FALSE	-0.023	-0.274	FALSE
79098	C1orf116	-0.64	0.247	TRUE	-0.567	0.301	TRUE	-0.472	0.337	TRUE	-0.363	0.323	TRUE	-0.221	0.076	TRUE
127687	C1orf122	-0.256	0.02	FALSE	-0.223	0.066	FALSE	-0.147	0.066	FALSE	-0.072	-0.051	FALSE	-0.025	-0.405	FALSE
54987	CZIB	-0.521	-0.164	FALSE	-0.473	-0.221	FALSE	-0.415	-0.227	FALSE	-0.322	-0.236	FALSE	-0.2	-0.085	FALSE
128061	C1orf131	-0.584	-0.29	TRUE	-0.523	-0.281	TRUE	-0.454	-0.237	TRUE	-0.394	-0.167	TRUE	-0.272	-0.028	TRUE
400757	C1orf141	-0.382	-0.057	FALSE	-0.304	-0.029	FALSE	-0.218	-0.081	FALSE	-0.172	-0.049	FALSE	-0.075	-0.143	FALSE
388649	C1orf146	-0.27	-0.041	FALSE	-0.222	-0.08	FALSE	-0.161	-0.122	FALSE	-0.107	-0.237	FALSE	-0.026	-0.794	FALSE
93190	C1orf158	-0.458	-0.034	FALSE	-0.355	-0.077	FALSE	-0.301	-0.167	FALSE	-0.22	-0.211	FALSE	-0.089	-0.558	FALSE
54991	C1orf159	-0.3	-0.218	FALSE	-0.216	-0.288	FALSE	-0.182	-0.27	FALSE	-0.132	-0.305	FALSE	-0.061	-0.638	FALSE
128346	C1orf162	-0.439	-0.106	FALSE	-0.317	-0.212	FALSE	-0.253	-0.294	FALSE	-0.211	-0.355	FALSE	-0.094	-0.543	FALSE
339448	C1orf174	-0.399	-0.096	FALSE	-0.347	-0.082	FALSE	-0.262	-0.105	FALSE	-0.168	-0.286	FALSE	-0.063	-0.702	FALSE
84886	C1orf198	-0.348	-0.167	FALSE	-0.258	-0.236	FALSE	-0.187	-0.269	FALSE	-0.131	-0.345	FALSE	-0.03	-0.898	FALSE
81563	C1orf21	-0.119	-0.345	FALSE	-0.048	-0.56	FALSE	-0.032	-0.926	FALSE	-0.026	-0.975	FALSE	-0.024	-0.98	FALSE
79169	C1orf35	-0.234	-0.037	FALSE	-0.146	-0.081	FALSE	-0.078	-0.159	FALSE	-0.036	-0.204	FALSE	-0.025	-0.191	FALSE
25912	C1orf43	-0.15	-0.106	FALSE	-0.123	-0.053	FALSE	-0.098	-0.022	FALSE	-0.067	-0.015	FALSE	-0.038	-0.122	FALSE
388722	C1orf53	-0.437	-0.106	FALSE	-0.338	-0.151	FALSE	-0.294	-0.146	FALSE	-0.211	-0.273	FALSE	-0.085	-0.579	FALSE
79630	C1orf54	-0.816	0.029	TRUE	-0.697	0.061	TRUE	-0.597	-0.018	TRUE	-0.484	0.008	TRUE	-0.252	0.132	TRUE
54964	C1orf56	-0.289	0.039	FALSE	-0.251	0.028	FALSE	-0.204	0.076	FALSE	-0.148	0.095	FALSE	-0.053	0.151	FALSE
148304	C1orf74	-0.266	0.007	FALSE	-0.205	0.06	FALSE	-0.162	0.114	FALSE	-0.119	0.139	FALSE	-0.062	0.343	FALSE
127795	C1orf87	-0.237	-0.144	FALSE	-0.198	-0.13	FALSE	-0.161	-0.126	FALSE	-0.107	-0.081	FALSE	-0.032	-0.2	FALSE
717	C2	-0.327	-0.2	FALSE	-0.287	-0.151	FALSE	-0.257	-0.107	FALSE	-0.201	-0.154	FALSE	-0.128	-0.072	FALSE
140873	C20orf173	-0.225	-0.064	FALSE	-0.174	-0.002	FALSE	-0.122	-0.021	FALSE	-0.079	-0.03	FALSE	-0.026	-0.062	FALSE
400831	C20orf202	-0.358	0.203	FALSE	-0.223	0.273	FALSE	-0.13	0.192	FALSE	-0.053	0.131	FALSE	-0.028	-0.241	FALSE
128602	C20orf85	-0.208	-0.006	FALSE	-0.18	-0.019	FALSE	-0.107	-0.089	FALSE	-0.067	-0.15	FALSE	-0.024	-0.622	FALSE
54058	C21orf58	-0.249	-0.082	FALSE	-0.173	-0.05	FALSE	-0.097	-0.071	FALSE	-0.053	-0.188	FALSE	-0.032	-0.247	FALSE
56245	C21orf62	-0.783	0.047	TRUE	-0.704	0.106	TRUE	-0.638	0.106	TRUE	-0.499	0.081	TRUE	-0.221	0.051	TRUE
54149	C21orf91	-0.082	0.007	FALSE	-0.029	-0.033	FALSE	-0.024	0.053	FALSE	-0.023	0.148	FALSE	-0.022	0.498	FALSE
84645	C22orf23	-0.346	0.105	FALSE	-0.264	0.073	FALSE	-0.21	0.125	FALSE	-0.134	0.094	FALSE	-0.051	-0.393	FALSE
25770	C22orf31	-0.382	-0.226	FALSE	-0.314	-0.267	FALSE	-0.258	-0.281	FALSE	-0.19	-0.405	FALSE	-0.078	-0.609	FALSE
79640	C22orf46	-0.105	0.006	FALSE	-0.072	0.044	FALSE	-0.058	0.116	FALSE	-0.046	0.196	FALSE	-0.031	0.622	FALSE
25966	C2CD2	-0.158	-0.179	FALSE	-0.119	-0.206	FALSE	-0.083	-0.203	FALSE	-0.035	-0.282	FALSE	-0.024	-0.443	FALSE
9854	C2CD2L	-0.537	-0.111	FALSE	-0.418	-0.137	FALSE	-0.345	-0.237	FALSE	-0.258	-0.323	FALSE	-0.142	-0.278	FALSE
9847	C2CD5	-0.4	0.003	FALSE	-0.296	0.005	FALSE	-0.221	-0.017	FALSE	-0.157	-0.054	FALSE	-0.024	-0.786	FALSE
151254	C2CD6	-0.344	0.109	FALSE	-0.26	0.091	FALSE	-0.176	0.085	FALSE	-0.085	0.012	FALSE	-0.023	-0.333	FALSE
150590	C2orf15	-0.148	-0.106	FALSE	-0.113	-0.174	FALSE	-0.076	-0.163	FALSE	-0.042	-0.163	FALSE	-0.026	-0.231	FALSE
84226	C2orf16	-0.254	-0.153	FALSE	-0.188	-0.135	FALSE	-0.144	-0.158	FALSE	-0.077	-0.255	FALSE	-0.027	-0.743	FALSE
84417	ECRG4	-0.243	-0.075	FALSE	-0.19	-0.061	FALSE	-0.11	-0.128	FALSE	-0.047	-0.253	FALSE	-0.023	-0.442	FALSE
79074	C2orf49	-0.442	0.144	FALSE	-0.339	0.144	FALSE	-0.277	0.17	FALSE	-0.208	0.189	FALSE	-0.1	0.047	FALSE
130813	C2orf50	-0.413	-0.379	FALSE	-0.316	-0.433	FALSE	-0.273	-0.455	FALSE	-0.21	-0.449	FALSE	-0.125	-0.399	FALSE
401027	C2orf66	-0.42	-0.212	FALSE	-0.363	-0.196	FALSE	-0.301	-0.241	FALSE	-0.221	-0.357	FALSE	-0.107	-0.45	FALSE
205327	C2orf69	-0.363	-0.083	FALSE	-0.267	-0.06	FALSE	-0.18	-0.112	FALSE	-0.11	-0.165	FALSE	-0.051	-0.435	FALSE
129852	C2orf73	-0.57	0.176	TRUE	-0.418	0.156	TRUE	-0.348	0.136	TRUE	-0.245	0.011	TRUE	-0.067	-0.696	TRUE
130355	C2orf76	-0.265	-0.55	FALSE	-0.123	-0.763	FALSE	-0.04	-0.933	FALSE	-0.028	-0.967	FALSE	-0.024	-0.977	FALSE
718	C3	-0.321	-0.167	FALSE	-0.231	-0.167	FALSE	-0.196	-0.192	FALSE	-0.147	-0.152	FALSE	-0.069	-0.152	FALSE
719	C3AR1	-0.508	0.015	FALSE	-0.467	0.04	FALSE	-0.409	-0.001	FALSE	-0.341	0.048	FALSE	-0.236	0.008	FALSE
152405	TEX55	-0.353	0.094	FALSE	-0.254	0.052	FALSE	-0.174	0.04	FALSE	-0.092	-0.032	FALSE	-0.022	-0.544	FALSE
285315	C3orf33	-0.185	-0.033	FALSE	-0.147	-0.014	FALSE	-0.104	0.03	FALSE	-0.054	0.043	FALSE	-0.019	0.308	FALSE
285237	C3orf38	-0.36	-0.063	FALSE	-0.308	-0.023	FALSE	-0.248	-0.011	FALSE	-0.202	0.041	FALSE	-0.103	0.078	FALSE
79669	C3orf52	-0.843	-0.16	TRUE	-0.771	-0.075	TRUE	-0.576	-0.087	TRUE	-0.42	-0.067	TRUE	-0.274	0.229	TRUE
205428	DIPK2A	-0.428	0.063	FALSE	-0.321	0.107	FALSE	-0.269	0.053	FALSE	-0.178	-0.077	FALSE	-0.052	-0.729	FALSE
200844	C3orf67	-0.218	-0.046	FALSE	-0.167	-0.028	FALSE	-0.116	-0.062	FALSE	-0.05	-0.227	FALSE	-0.021	-0.553	FALSE
401097	C3orf80	-0.281	-0.185	FALSE	-0.219	-0.204	FALSE	-0.17	-0.217	FALSE	-0.118	-0.226	FALSE	-0.025	-0.686	FALSE
722	C4BPA	-0.349	-0.022	FALSE	-0.227	0.007	FALSE	-0.169	-0.04	FALSE	-0.115	-0.032	FALSE	-0.037	0.059	FALSE
725	C4BPB	-0.283	0.026	FALSE	-0.232	-0.036	FALSE	-0.146	-0.05	FALSE	-0.1	-0.027	FALSE	-0.044	0.065	FALSE
132321	C4orf33	-0.382	-0.075	FALSE	-0.246	-0.141	FALSE	-0.192	-0.146	FALSE	-0.141	-0.216	FALSE	-0.025	-0.745	FALSE
132989	C4orf36	-0.246	0.069	FALSE	-0.178	0	FALSE	-0.128	-0.061	FALSE	-0.066	-0.167	FALSE	-0.025	-0.465	FALSE
152940	C4orf45	-0.323	-0.006	FALSE	-0.232	0.003	FALSE	-0.197	0.022	FALSE	-0.109	-0.064	FALSE	-0.024	-0.706	FALSE
401115	C4orf48	-0.521	0.011	FALSE	-0.387	-0.013	FALSE	-0.282	-0.047	FALSE	-0.213	-0.179	FALSE	-0.058	-0.735	FALSE
727	C5	-0.308	-0.046	FALSE	-0.28	0.017	FALSE	-0.208	0.024	FALSE	-0.146	0.021	FALSE	-0.076	0.106	FALSE
728	C5AR1	-0.386	-0.144	FALSE	-0.3	-0.161	FALSE	-0.251	-0.141	FALSE	-0.201	-0.122	FALSE	-0.122	-0.127	FALSE
27202	C5AR2	-0.498	0.258	FALSE	-0.422	0.31	FALSE	-0.321	0.302	FALSE	-0.216	0.311	FALSE	-0.116	0.547	FALSE
56951	C5orf15	-0.187	-0.094	FALSE	-0.125	-0.076	FALSE	-0.084	-0.212	FALSE	-0.052	-0.242	FALSE	-0.033	-0.313	FALSE
55322	C5orf22	-0.519	-0.131	FALSE	-0.395	-0.156	FALSE	-0.363	-0.16	FALSE	-0.268	-0.288	FALSE	-0.14	-0.279	FALSE
134553	C5orf24	-0.268	-0.189	FALSE	-0.201	-0.187	FALSE	-0.164	-0.192	FALSE	-0.111	-0.308	FALSE	-0.029	-0.818	FALSE
375444	C5orf34	-0.296	-0.006	FALSE	-0.171	-0.062	FALSE	-0.131	-0.032	FALSE	-0.084	-0.029	FALSE	-0.034	-0.3	FALSE
389336	C5orf46	-0.228	0.094	FALSE	-0.155	0.089	FALSE	-0.073	0.011	FALSE	-0.022	-0.02	FALSE	-0.018	-0.153	FALSE
133491	C5orf47	-0.537	-0.111	FALSE	-0.401	-0.195	FALSE	-0.32	-0.27	FALSE	-0.236	-0.376	FALSE	-0.109	-0.452	FALSE
285636	C5orf51	-0.271	-0.27	FALSE	-0.218	-0.314	FALSE	-0.188	-0.276	FALSE	-0.111	-0.342	FALSE	-0.023	-0.834	FALSE
100190949	C5orf52	-0.67	-0.195	TRUE	-0.55	-0.216	TRUE	-0.471	-0.192	TRUE	-0.396	-0.102	TRUE	-0.228	0.068	TRUE
729	C6	-0.493	0.283	FALSE	-0.456	0.332	FALSE	-0.382	0.268	FALSE	-0.28	0.292	FALSE	-0.168	0.366	FALSE
10665	TSBP1	-0.424	0.062	FALSE	-0.329	0.044	FALSE	-0.268	-0.008	FALSE	-0.184	-0.102	FALSE	-0.037	-0.817	FALSE
64771	ILRUN	-0.367	-0.023	FALSE	-0.3	0.004	FALSE	-0.235	-0.029	FALSE	-0.164	-0.133	FALSE	-0.054	-0.765	FALSE
168090	C6orf118	-0.262	0.035	FALSE	-0.206	0.05	FALSE	-0.154	0.058	FALSE	-0.088	0.075	FALSE	-0.028	0.001	FALSE
221545	C6orf136	-0.516	0.035	FALSE	-0.4	-0.094	FALSE	-0.341	-0.11	FALSE	-0.28	-0.181	FALSE	-0.132	-0.354	FALSE
29113	C6orf15	-0.499	-0.167	FALSE	-0.387	-0.214	FALSE	-0.326	-0.315	FALSE	-0.246	-0.398	FALSE	-0.138	-0.467	FALSE
206412	C6orf163	-0.047	0.078	FALSE	-0.033	0.18	FALSE	-0.029	0.28	FALSE	-0.026	0.44	FALSE	-0.024	0.89	FALSE
404220	C6orf201	-0.244	-0.192	FALSE	-0.189	-0.276	FALSE	-0.15	-0.305	FALSE	-0.09	-0.402	FALSE	-0.024	-0.852	FALSE
221416	C6orf223	-0.302	-0.117	FALSE	-0.249	-0.087	FALSE	-0.197	-0.095	FALSE	-0.121	-0.167	FALSE	-0.022	-0.789	FALSE
50854	SNHG32	-0.341	-0.266	FALSE	-0.262	-0.258	FALSE	-0.227	-0.273	FALSE	-0.155	-0.345	FALSE	-0.052	-0.794	FALSE
347744	C6orf52	-0.672	-0.202	TRUE	-0.566	-0.184	TRUE	-0.46	-0.206	TRUE	-0.381	-0.128	TRUE	-0.226	0.061	TRUE
352999	C6orf58	-0.365	-0.17	FALSE	-0.303	-0.188	FALSE	-0.272	-0.156	FALSE	-0.203	-0.259	FALSE	-0.055	-0.767	FALSE
81688	C6orf62	-0.337	0.131	FALSE	-0.242	0.126	FALSE	-0.194	0.179	FALSE	-0.121	0.161	FALSE	-0.023	-0.265	FALSE
221477	C6orf89	-0.142	-0.052	FALSE	-0.093	-0.033	FALSE	-0.057	-0.022	FALSE	-0.033	0.075	FALSE	-0.025	0.19	FALSE
730	C7	-0.658	0.146	TRUE	-0.591	0.142	TRUE	-0.512	0.127	TRUE	-0.413	0.134	TRUE	-0.286	0.07	TRUE
136895	C7orf31	-0.393	-0.036	FALSE	-0.292	0.033	FALSE	-0.216	0.061	FALSE	-0.138	-0.051	FALSE	-0.024	-0.728	FALSE
55262	MAP11	-0.243	-0.141	FALSE	-0.185	-0.115	FALSE	-0.133	-0.09	FALSE	-0.087	-0.162	FALSE	-0.032	-0.551	FALSE
136288	C7orf57	-0.317	0.116	FALSE	-0.2	0.071	FALSE	-0.143	0.116	FALSE	-0.055	0.06	FALSE	-0.025	-0.034	FALSE
731	C8A	-0.404	0.018	FALSE	-0.342	0.053	FALSE	-0.316	0.038	FALSE	-0.245	0.007	FALSE	-0.148	-0.219	FALSE
732	C8B	-0.237	-0.053	FALSE	-0.177	0.035	FALSE	-0.139	0.064	FALSE	-0.084	0.123	FALSE	-0.021	0.305	FALSE
733	C8G	-0.251	-0.116	FALSE	-0.234	-0.103	FALSE	-0.19	-0.078	FALSE	-0.108	-0.088	FALSE	-0.056	-0.047	FALSE
65265	C8orf33	-0.377	-0.088	FALSE	-0.322	-0.095	FALSE	-0.23	-0.112	FALSE	-0.165	-0.127	FALSE	-0.084	-0.115	FALSE
116328	C8orf34	-0.196	-0.26	FALSE	-0.163	-0.279	FALSE	-0.132	-0.246	FALSE	-0.081	-0.35	FALSE	-0.023	-0.633	FALSE
157657	C8orf37	-0.376	-0.057	FALSE	-0.332	-0.123	FALSE	-0.257	-0.173	FALSE	-0.177	-0.285	FALSE	-0.057	-0.762	FALSE
56260	C8orf44	-0.515	0.183	FALSE	-0.43	0.212	FALSE	-0.315	0.129	FALSE	-0.247	0.237	FALSE	-0.078	0.007	FALSE
157773	C8orf48	-0.638	-0.273	TRUE	-0.529	-0.246	TRUE	-0.466	-0.19	TRUE	-0.353	-0.16	TRUE	-0.241	0.133	TRUE
414919	C8orf82	-0.356	0.057	FALSE	-0.266	0.035	FALSE	-0.183	0.064	FALSE	-0.1	-0.067	FALSE	-0.038	-0.556	FALSE
389649	C8orf86	-0.258	0.084	FALSE	-0.193	0.104	FALSE	-0.153	0.147	FALSE	-0.095	0.176	FALSE	-0.022	0.373	FALSE
735	C9	-0.439	0.026	FALSE	-0.379	-0.089	FALSE	-0.345	-0.035	FALSE	-0.285	-0.008	FALSE	-0.188	-0.071	FALSE
138724	C9orf131	-0.369	-0.043	FALSE	-0.281	-0.13	FALSE	-0.202	-0.242	FALSE	-0.15	-0.322	FALSE	-0.05	-0.807	FALSE
138255	C9orf135	-0.302	0.083	FALSE	-0.209	0.042	FALSE	-0.16	0.045	FALSE	-0.095	-0.103	FALSE	-0.025	-0.558	FALSE
401546	C9orf152	-0.29	-0.027	FALSE	-0.206	-0.062	FALSE	-0.158	-0.021	FALSE	-0.077	-0.104	FALSE	-0.024	-0.495	FALSE
84688	C9orf24	-0.493	0.171	FALSE	-0.332	0.132	FALSE	-0.278	0.19	FALSE	-0.189	0.093	FALSE	-0.092	-0.001	FALSE
84909	AOPEP	-0.332	-0.074	FALSE	-0.259	-0.044	FALSE	-0.2	-0.035	FALSE	-0.132	-0.056	FALSE	-0.036	-0.255	FALSE
55071	C9orf40	-0.411	0.185	FALSE	-0.287	0.112	FALSE	-0.183	0.05	FALSE	-0.075	-0.01	FALSE	-0.024	-0.322	FALSE
257169	C9orf43	-0.744	0.107	TRUE	-0.633	0.132	TRUE	-0.538	0.084	TRUE	-0.415	-0.015	TRUE	-0.211	0.005	TRUE
157983	DOCK8-AS1	-0.45	-0.102	FALSE	-0.383	-0.144	FALSE	-0.319	-0.14	FALSE	-0.26	-0.276	FALSE	-0.136	-0.322	FALSE
203228	C9orf72	-0.152	-0.083	FALSE	-0.11	-0.129	FALSE	-0.039	-0.141	FALSE	-0.026	-0.113	FALSE	-0.023	0.035	FALSE
138241	C9orf85	-0.335	-0.028	FALSE	-0.277	-0.162	FALSE	-0.234	-0.142	FALSE	-0.168	-0.243	FALSE	-0.046	-0.823	FALSE
759	CA1	-0.626	-0.064	TRUE	-0.516	-0.107	TRUE	-0.392	-0.141	TRUE	-0.303	-0.219	TRUE	-0.212	-0.01	TRUE
56934	CA10	-0.376	-0.021	FALSE	-0.332	0.04	FALSE	-0.279	-0.037	FALSE	-0.197	-0.066	FALSE	-0.099	-0.071	FALSE
770	CA11	-0.379	-0.117	FALSE	-0.304	-0.13	FALSE	-0.279	-0.081	FALSE	-0.188	-0.138	FALSE	-0.089	-0.241	FALSE
771	CA12	-0.429	0.189	FALSE	-0.246	0.081	FALSE	-0.178	0.126	FALSE	-0.12	0.197	FALSE	-0.012	0.32	FALSE
377677	CA13	-0.397	0.067	FALSE	-0.345	0.113	FALSE	-0.284	0.114	FALSE	-0.197	0.118	FALSE	-0.089	0.043	FALSE
23632	CA14	-0.331	-0.097	FALSE	-0.298	-0.089	FALSE	-0.252	-0.092	FALSE	-0.19	-0.095	FALSE	-0.08	-0.204	FALSE
760	CA2	-0.418	0.3	FALSE	-0.341	0.255	FALSE	-0.283	0.273	FALSE	-0.202	0.325	FALSE	-0.087	0.366	FALSE
761	CA3	-0.389	-0.039	FALSE	-0.264	-0.088	FALSE	-0.22	-0.132	FALSE	-0.165	-0.096	FALSE	-0.076	-0.216	FALSE
762	CA4	-0.414	-0.048	FALSE	-0.281	-0.137	FALSE	-0.233	-0.151	FALSE	-0.167	-0.204	FALSE	-0.095	-0.364	FALSE
763	CA5A	-0.439	0.071	FALSE	-0.359	0.13	FALSE	-0.26	0.189	FALSE	-0.184	0.242	FALSE	-0.084	0.267	FALSE
11238	CA5B	-0.423	-0.094	FALSE	-0.322	-0.095	FALSE	-0.218	-0.209	FALSE	-0.156	-0.213	FALSE	-0.096	-0.271	FALSE
765	CA6	-0.403	-0.174	FALSE	-0.337	-0.184	FALSE	-0.26	-0.207	FALSE	-0.214	-0.196	FALSE	-0.136	-0.187	FALSE
766	CA7	-0.384	-0.016	FALSE	-0.315	-0.059	FALSE	-0.259	-0.12	FALSE	-0.196	-0.146	FALSE	-0.119	-0.279	FALSE
767	CA8	-0.513	0.222	FALSE	-0.355	0.165	FALSE	-0.288	0.16	FALSE	-0.193	0.099	FALSE	-0.087	-0.006	FALSE
768	CA9	-0.389	-0.111	FALSE	-0.348	-0.093	FALSE	-0.274	-0.08	FALSE	-0.221	-0.106	FALSE	-0.117	-0.18	FALSE
51719	CAB39	-0.403	0.293	FALSE	-0.334	0.237	FALSE	-0.287	0.248	FALSE	-0.235	0.344	FALSE	-0.115	0.292	FALSE
81617	CAB39L	-0.321	-0.07	FALSE	-0.248	-0.052	FALSE	-0.21	-0.004	FALSE	-0.152	-0.001	FALSE	-0.057	-0.166	FALSE
23523	CABIN1	-0.567	0.135	TRUE	-0.381	0.052	TRUE	-0.291	-0.075	TRUE	-0.216	-0.142	TRUE	-0.073	-0.658	TRUE
81928	CABLES2	-0.513	0.073	FALSE	-0.404	0.029	FALSE	-0.271	-0.065	FALSE	-0.205	-0.094	FALSE	-0.116	-0.202	FALSE
9478	CABP1	-0.498	0.201	FALSE	-0.406	0.236	FALSE	-0.344	0.232	FALSE	-0.277	0.249	FALSE	-0.154	0.284	FALSE
51475	CABP2	-0.476	0.222	FALSE	-0.425	0.289	FALSE	-0.354	0.218	FALSE	-0.285	0.206	FALSE	-0.167	0.229	FALSE
57010	CABP4	-0.429	0.213	FALSE	-0.346	0.164	FALSE	-0.309	0.155	FALSE	-0.232	0.151	FALSE	-0.134	0.231	FALSE
56344	CABP5	-0.755	0.187	TRUE	-0.67	0.194	TRUE	-0.559	0.206	TRUE	-0.481	0.219	TRUE	-0.333	0.357	TRUE
164633	CABP7	-0.52	0.024	FALSE	-0.446	0.094	FALSE	-0.345	0.02	FALSE	-0.283	-0.018	FALSE	-0.171	-0.162	FALSE
85438	CABS1	-0.623	0.28	TRUE	-0.541	0.296	TRUE	-0.418	0.293	TRUE	-0.256	0.127	TRUE	-0.028	-0.859	TRUE
26256	CABYR	-0.407	0.022	FALSE	-0.358	0.022	FALSE	-0.303	0.073	FALSE	-0.188	0.03	FALSE	-0.107	0.067	FALSE
11094	CACFD1	-0.573	-0.091	TRUE	-0.494	-0.169	TRUE	-0.416	-0.212	TRUE	-0.328	-0.206	TRUE	-0.194	-0.063	TRUE
57685	CACHD1	-0.298	0.2	FALSE	-0.224	0.177	FALSE	-0.136	0.158	FALSE	-0.049	0.091	FALSE	-0.025	-0.187	FALSE
773	CACNA1A	-0.324	-0.099	FALSE	-0.267	-0.14	FALSE	-0.205	-0.169	FALSE	-0.152	-0.141	FALSE	-0.084	-0.131	FALSE
774	CACNA1B	-0.635	-0.024	TRUE	-0.599	-0.068	TRUE	-0.494	-0.079	TRUE	-0.405	-0.09	TRUE	-0.292	-0.077	TRUE
775	CACNA1C	-0.626	-0.013	TRUE	-0.575	0.048	TRUE	-0.501	0.053	TRUE	-0.44	0.093	TRUE	-0.317	0.089	TRUE
776	CACNA1D	-0.403	-0.095	FALSE	-0.299	-0.131	FALSE	-0.259	-0.134	FALSE	-0.197	-0.109	FALSE	-0.112	-0.161	FALSE
777	CACNA1E	-0.327	0.086	FALSE	-0.279	0.113	FALSE	-0.226	0.073	FALSE	-0.174	0.064	FALSE	-0.09	0.118	FALSE
778	CACNA1F	-0.465	-0.016	FALSE	-0.359	-0.047	FALSE	-0.297	-0.048	FALSE	-0.251	-0.092	FALSE	-0.158	-0.152	FALSE
8913	CACNA1G	-0.281	-0.061	FALSE	-0.208	-0.031	FALSE	-0.175	-0.059	FALSE	-0.121	-0.069	FALSE	-0.048	0.043	FALSE
8912	CACNA1H	-0.287	0.159	FALSE	-0.223	0.14	FALSE	-0.168	0.135	FALSE	-0.089	0.154	FALSE	0.013	0.168	FALSE
8911	CACNA1I	-0.59	0.224	TRUE	-0.485	0.248	TRUE	-0.328	0.236	TRUE	-0.227	0.288	TRUE	-0.096	0.298	TRUE
779	CACNA1S	-0.3	-0.07	FALSE	-0.234	-0.087	FALSE	-0.204	-0.002	FALSE	-0.132	0.011	FALSE	-0.052	-0.006	FALSE
781	CACNA2D1	-0.405	-0.03	FALSE	-0.298	-0.06	FALSE	-0.244	-0.014	FALSE	-0.166	-0.017	FALSE	-0.1	0.018	FALSE
9254	CACNA2D2	-0.334	-0.089	FALSE	-0.273	-0.133	FALSE	-0.201	-0.155	FALSE	-0.153	-0.167	FALSE	-0.09	-0.108	FALSE
55799	CACNA2D3	-0.629	-0.016	TRUE	-0.521	-0.061	TRUE	-0.467	-0.076	TRUE	-0.387	-0.08	TRUE	-0.279	0.237	TRUE
93589	CACNA2D4	-0.372	0.177	FALSE	-0.284	0.203	FALSE	-0.228	0.224	FALSE	-0.156	0.238	FALSE	-0.042	0.027	FALSE
782	CACNB1	-0.597	0.503	TRUE	-0.464	0.552	TRUE	-0.369	0.509	TRUE	-0.244	0.522	TRUE	-0.106	0.616	TRUE
783	CACNB2	-0.332	0.025	FALSE	-0.292	0.076	FALSE	-0.252	0.052	FALSE	-0.19	0.12	FALSE	-0.092	0.134	FALSE
784	CACNB3	-0.561	-0.075	TRUE	-0.537	0.002	TRUE	-0.425	-0.018	TRUE	-0.329	-0.028	TRUE	-0.22	-0.05	TRUE
785	CACNB4	-0.405	0.129	FALSE	-0.319	0.118	FALSE	-0.263	0.048	FALSE	-0.211	0.107	FALSE	-0.119	0.153	FALSE
786	CACNG1	-0.367	0.082	FALSE	-0.269	0.075	FALSE	-0.217	0.059	FALSE	-0.147	0.03	FALSE	-0.056	-0.043	FALSE
10369	CACNG2	-0.49	0.091	FALSE	-0.437	0.151	FALSE	-0.361	0.159	FALSE	-0.292	0.149	FALSE	-0.174	-0.137	FALSE
10368	CACNG3	-0.446	0.164	FALSE	-0.364	0.194	FALSE	-0.286	0.234	FALSE	-0.206	0.253	FALSE	-0.084	0.091	FALSE
27092	CACNG4	-0.401	-0.088	FALSE	-0.284	-0.111	FALSE	-0.231	-0.1	FALSE	-0.17	-0.095	FALSE	-0.088	-0.068	FALSE
27091	CACNG5	-0.672	-0.102	TRUE	-0.62	-0.063	TRUE	-0.542	-0.109	TRUE	-0.486	0.02	TRUE	-0.378	0.506	TRUE
59285	CACNG6	-0.264	0.07	FALSE	-0.205	0.039	FALSE	-0.175	0.046	FALSE	-0.106	0.084	FALSE	-0.033	0.117	FALSE
59284	CACNG7	-0.272	0.191	FALSE	-0.215	0.209	FALSE	-0.171	0.196	FALSE	-0.1	0.2	FALSE	-0.017	0.142	FALSE
59283	CACNG8	-0.53	-0.157	FALSE	-0.46	-0.18	FALSE	-0.381	-0.167	FALSE	-0.318	-0.14	FALSE	-0.219	-0.123	FALSE
143384	CACUL1	-0.369	-0.2	FALSE	-0.302	-0.19	FALSE	-0.255	-0.222	FALSE	-0.192	-0.314	FALSE	-0.073	-0.631	FALSE
27101	CACYBP	-0.436	-0.112	FALSE	-0.339	-0.112	FALSE	-0.283	-0.176	FALSE	-0.214	-0.277	FALSE	-0.095	-0.551	FALSE
790	CAD	-1.198	0.168	TRUE	-1.075	0.196	TRUE	-0.97	0.205	TRUE	-0.808	0.236	TRUE	-0.557	0.346	TRUE
23705	CADM1	-0.357	-0.122	FALSE	-0.311	-0.084	FALSE	-0.256	-0.086	FALSE	-0.184	-0.051	FALSE	-0.087	-0.159	FALSE
253559	CADM2	-0.312	-0.173	FALSE	-0.234	-0.184	FALSE	-0.195	-0.176	FALSE	-0.148	-0.256	FALSE	-0.078	-0.33	FALSE
57863	CADM3	-0.402	-0.064	FALSE	-0.341	-0.042	FALSE	-0.262	-0.028	FALSE	-0.2	-0.021	FALSE	-0.105	-0.018	FALSE
199731	CADM4	-0.45	0.041	FALSE	-0.348	-0.04	FALSE	-0.296	-0.045	FALSE	-0.256	-0.052	FALSE	-0.154	-0.185	FALSE
8618	CADPS	-0.248	-0.153	FALSE	-0.18	-0.18	FALSE	-0.131	-0.224	FALSE	-0.065	-0.272	FALSE	-0.025	-0.57	FALSE
93664	CADPS2	-0.356	-0.164	FALSE	-0.301	-0.149	FALSE	-0.243	-0.213	FALSE	-0.183	-0.282	FALSE	-0.035	-0.896	FALSE
285782	CAGE1	-0.735	0.18	TRUE	-0.541	0.21	TRUE	-0.418	0.141	TRUE	-0.314	0.032	TRUE	-0.077	-0.616	TRUE
793	CALB1	-0.379	0.024	FALSE	-0.323	0.011	FALSE	-0.277	0.093	FALSE	-0.192	0.105	FALSE	-0.076	-0.052	FALSE
794	CALB2	-0.425	-0.147	FALSE	-0.382	-0.145	FALSE	-0.331	-0.105	FALSE	-0.256	-0.13	FALSE	-0.154	-0.17	FALSE
796	CALCA	-0.293	-0.051	FALSE	-0.21	-0.081	FALSE	-0.168	-0.08	FALSE	-0.118	-0.067	FALSE	-0.035	-0.244	FALSE
797	CALCB	-0.266	-0.157	FALSE	-0.2	-0.179	FALSE	-0.153	-0.19	FALSE	-0.118	-0.301	FALSE	-0.065	-0.644	FALSE
10241	CALCOCO2	-0.492	0.058	FALSE	-0.394	0.032	FALSE	-0.314	-0.018	FALSE	-0.227	-0.059	FALSE	-0.134	-0.075	FALSE
799	CALCR	-0.394	0.013	FALSE	-0.307	0.03	FALSE	-0.263	0.049	FALSE	-0.202	0.033	FALSE	-0.115	0.074	FALSE
10203	CALCRL	-0.498	-0.201	FALSE	-0.435	-0.177	FALSE	-0.378	-0.176	FALSE	-0.298	-0.189	FALSE	-0.201	-0.042	FALSE
800	CALD1	-0.582	0.147	TRUE	-0.459	0.158	TRUE	-0.407	0.147	TRUE	-0.316	0.103	TRUE	-0.18	0.04	TRUE
255022	CALHM1	-0.429	0.023	FALSE	-0.306	-0.018	FALSE	-0.214	-0.12	FALSE	-0.133	-0.225	FALSE	-0.046	-0.81	FALSE
119395	CALHM3	-0.373	-0.137	FALSE	-0.298	-0.158	FALSE	-0.212	-0.246	FALSE	-0.156	-0.3	FALSE	-0.039	-0.875	FALSE
221301	CALHM4	-0.27	-0.172	FALSE	-0.202	-0.213	FALSE	-0.142	-0.235	FALSE	-0.106	-0.254	FALSE	-0.023	-0.789	FALSE
254228	CALHM5	-0.53	-0.132	FALSE	-0.468	-0.122	FALSE	-0.351	-0.213	FALSE	-0.284	-0.263	FALSE	-0.129	-0.345	FALSE
801	CALM1	-0.529	-0.065	FALSE	-0.45	-0.078	FALSE	-0.409	-0.088	FALSE	-0.334	-0.044	FALSE	-0.219	-0.041	FALSE
805	CALM2	-0.654	-0.094	TRUE	-0.595	-0.078	TRUE	-0.516	-0.051	TRUE	-0.415	-0.095	TRUE	-0.305	-0.1	TRUE
808	CALM3	-0.44	-0.132	FALSE	-0.364	-0.098	FALSE	-0.323	-0.085	FALSE	-0.25	-0.113	FALSE	-0.177	-0.094	FALSE
91860	CALML4	-0.212	-0.14	FALSE	-0.177	-0.101	FALSE	-0.142	-0.067	FALSE	-0.087	-0.014	FALSE	-0.027	-0.056	FALSE
51806	CALML5	-0.331	-0.057	FALSE	-0.278	-0.017	FALSE	-0.21	0.013	FALSE	-0.166	0.046	FALSE	-0.088	0.08	FALSE
163688	CALML6	-0.423	0.078	FALSE	-0.314	0.071	FALSE	-0.241	0.09	FALSE	-0.172	0.081	FALSE	-0.076	0.019	FALSE
83698	CALN1	-0.527	0.099	FALSE	-0.458	0.054	FALSE	-0.397	0.065	FALSE	-0.339	0.039	FALSE	-0.207	-0.046	FALSE
811	CALR	-0.37	-0.109	FALSE	-0.314	-0.083	FALSE	-0.262	-0.121	FALSE	-0.199	-0.119	FALSE	-0.12	-0.203	FALSE
125972	CALR3	-0.425	-0.027	FALSE	-0.34	-0.082	FALSE	-0.266	-0.107	FALSE	-0.217	-0.078	FALSE	-0.123	-0.203	FALSE
813	CALU	-0.205	-0.156	FALSE	-0.166	-0.221	FALSE	-0.112	-0.227	FALSE	-0.069	-0.261	FALSE	-0.022	-0.202	FALSE
50632	CALY	-0.483	0.342	FALSE	-0.395	0.192	FALSE	-0.318	0.229	FALSE	-0.254	0.277	FALSE	-0.124	0.156	FALSE
8536	CAMK1	-0.444	0.055	FALSE	-0.373	0.105	FALSE	-0.314	0.106	FALSE	-0.226	0.096	FALSE	-0.106	0.12	FALSE
57118	CAMK1D	-0.406	0.025	FALSE	-0.344	0.055	FALSE	-0.292	0.085	FALSE	-0.228	0.1	FALSE	-0.126	0.204	FALSE
57172	CAMK1G	-0.453	-0.119	FALSE	-0.317	-0.119	FALSE	-0.258	-0.104	FALSE	-0.189	-0.118	FALSE	-0.111	-0.072	FALSE
815	CAMK2A	-0.568	0.123	TRUE	-0.498	0.11	TRUE	-0.399	0.132	TRUE	-0.317	0.111	TRUE	-0.208	0.217	TRUE
816	CAMK2B	-0.741	0.308	TRUE	-0.62	0.342	TRUE	-0.515	0.301	TRUE	-0.384	0.299	TRUE	-0.232	0.306	TRUE
817	CAMK2D	-0.343	0.131	FALSE	-0.266	-0.039	FALSE	-0.237	-0.013	FALSE	-0.182	0.031	FALSE	-0.09	0.101	FALSE
818	CAMK2G	-0.553	-0.02	TRUE	-0.398	-0.053	TRUE	-0.335	-0.028	TRUE	-0.259	0	TRUE	-0.158	-0.037	TRUE
55450	CAMK2N1	-0.636	0.11	TRUE	-0.472	0.114	TRUE	-0.414	0.128	TRUE	-0.33	0.133	TRUE	-0.202	0.237	TRUE
814	CAMK4	-0.332	0.198	FALSE	-0.243	0.153	FALSE	-0.172	0.21	FALSE	-0.08	0.271	FALSE	0.026	0.394	FALSE
84254	CAMKK1	-0.689	0.197	TRUE	-0.618	0.218	TRUE	-0.499	0.211	TRUE	-0.4	0.234	TRUE	-0.255	0.318	TRUE
10645	CAMKK2	-0.44	-0.03	FALSE	-0.358	-0.028	FALSE	-0.303	-0.051	FALSE	-0.232	-0.099	FALSE	-0.149	-0.21	FALSE
79823	CAMKMT	-0.23	-0.014	FALSE	-0.165	-0.08	FALSE	-0.114	-0.155	FALSE	-0.072	-0.175	FALSE	-0.029	-0.514	FALSE
79012	CAMKV	-0.438	-0.019	FALSE	-0.386	0.013	FALSE	-0.298	-0.093	FALSE	-0.254	-0.026	FALSE	-0.167	0.049	FALSE
819	CAMLG	-0.482	0.234	FALSE	-0.404	0.264	FALSE	-0.32	0.326	FALSE	-0.251	0.387	FALSE	-0.131	0.447	FALSE
820	CAMP	-0.356	-0.205	FALSE	-0.222	-0.298	FALSE	-0.173	-0.304	FALSE	-0.108	-0.409	FALSE	-0.032	-0.896	FALSE
23261	CAMTA1	-0.281	-0.15	FALSE	-0.24	-0.085	FALSE	-0.137	-0.19	FALSE	-0.095	-0.281	FALSE	-0.028	-0.767	FALSE
23125	CAMTA2	-0.451	-0.275	FALSE	-0.351	-0.315	FALSE	-0.312	-0.288	FALSE	-0.263	-0.333	FALSE	-0.148	-0.275	FALSE
55832	CAND1	-0.767	0.289	TRUE	-0.706	0.117	TRUE	-0.652	0.134	TRUE	-0.554	0.12	TRUE	-0.422	0.197	TRUE
23066	CAND2	-0.369	0.086	FALSE	-0.306	0.102	FALSE	-0.22	0.115	FALSE	-0.138	0.108	FALSE	-0.038	0.022	FALSE
124583	CANT1	-0.329	-0.142	FALSE	-0.275	-0.113	FALSE	-0.214	-0.133	FALSE	-0.164	-0.076	FALSE	-0.091	-0.013	FALSE
821	CANX	-0.384	0.033	FALSE	-0.257	-0.003	FALSE	-0.22	0.037	FALSE	-0.162	0.003	FALSE	-0.089	0.066	FALSE
10487	CAP1	-0.5	0.019	FALSE	-0.436	0.058	FALSE	-0.391	0.066	FALSE	-0.33	0.074	FALSE	-0.207	-0.044	FALSE
10486	CAP2	-0.103	-0.1	FALSE	-0.081	-0.107	FALSE	-0.036	-0.131	FALSE	-0.022	-0.091	FALSE	-0.016	0.093	FALSE
822	CAPG	-0.749	-0.075	TRUE	-0.633	-0.098	TRUE	-0.572	-0.086	TRUE	-0.513	0.043	TRUE	-0.367	0.434	TRUE
823	CAPN1	-0.399	0.016	FALSE	-0.307	-0.001	FALSE	-0.267	0.03	FALSE	-0.195	0.03	FALSE	-0.115	0.046	FALSE
11132	CAPN10	-0.348	-0.043	FALSE	-0.254	-0.094	FALSE	-0.183	-0.126	FALSE	-0.132	-0.157	FALSE	-0.051	-0.332	FALSE
11131	CAPN11	-0.313	-0.03	FALSE	-0.286	-0.023	FALSE	-0.231	-0.053	FALSE	-0.179	-0.069	FALSE	-0.092	-0.188	FALSE
147968	CAPN12	-0.332	0.226	FALSE	-0.261	0.267	FALSE	-0.194	0.372	FALSE	-0.127	0.42	FALSE	-0.023	0.449	FALSE
92291	CAPN13	-0.256	0.077	FALSE	-0.175	0.112	FALSE	-0.099	0.094	FALSE	-0.041	0.079	FALSE	-0.024	0.458	FALSE
6650	CAPN15	-0.478	0.041	FALSE	-0.308	-0.047	FALSE	-0.259	-0.076	FALSE	-0.215	-0.039	FALSE	-0.117	-0.159	FALSE
824	CAPN2	-0.578	0.224	TRUE	-0.435	0.184	TRUE	-0.312	0.178	TRUE	-0.247	0.25	TRUE	-0.121	0.332	TRUE
825	CAPN3	-0.256	-0.079	FALSE	-0.216	0.01	FALSE	-0.187	0.042	FALSE	-0.137	0.08	FALSE	-0.043	0.008	FALSE
726	CAPN5	-0.203	0.141	FALSE	-0.144	0.228	FALSE	-0.114	0.293	FALSE	-0.067	0.363	FALSE	-0.027	0.751	FALSE
827	CAPN6	-0.351	-0.1	FALSE	-0.249	-0.098	FALSE	-0.219	-0.141	FALSE	-0.162	-0.138	FALSE	-0.092	-0.059	FALSE
23473	CAPN7	-0.238	-0.016	FALSE	-0.205	0.027	FALSE	-0.146	0.011	FALSE	-0.095	0.033	FALSE	-0.022	-0.018	FALSE
10753	CAPN9	-0.291	-0.139	FALSE	-0.222	-0.124	FALSE	-0.179	-0.105	FALSE	-0.133	-0.04	FALSE	-0.051	0.046	FALSE
826	CAPNS1	-0.537	-0.026	FALSE	-0.434	-0.014	FALSE	-0.383	-0.013	FALSE	-0.344	0.001	FALSE	-0.228	0.072	FALSE
84290	CAPNS2	-0.509	-0.218	FALSE	-0.466	-0.197	FALSE	-0.404	-0.199	FALSE	-0.36	-0.151	FALSE	-0.264	0.187	FALSE
4076	CAPRIN1	-0.416	-0.119	FALSE	-0.319	-0.125	FALSE	-0.287	-0.16	FALSE	-0.218	-0.172	FALSE	-0.15	-0.239	FALSE
65981	CAPRIN2	-0.6	-0.031	TRUE	-0.492	-0.002	TRUE	-0.412	-0.048	TRUE	-0.313	-0.096	TRUE	-0.189	-0.09	TRUE
828	CAPS	-0.289	-0.041	FALSE	-0.231	-0.022	FALSE	-0.171	-0.049	FALSE	-0.117	-0.01	FALSE	-0.052	-0.001	FALSE
84698	CAPS2	-0.435	-0.031	FALSE	-0.333	-0.071	FALSE	-0.289	-0.076	FALSE	-0.236	-0.133	FALSE	-0.124	-0.325	FALSE
829	CAPZA1	-0.356	0.005	FALSE	-0.277	0.029	FALSE	-0.242	0.068	FALSE	-0.151	-0.116	FALSE	-0.034	-0.865	FALSE
830	CAPZA2	-0.362	0.054	FALSE	-0.291	0.02	FALSE	-0.254	0.042	FALSE	-0.178	0.072	FALSE	-0.073	0.066	FALSE
93661	CAPZA3	-0.062	-0.088	FALSE	-0.03	-0.006	FALSE	-0.021	0.1	FALSE	-0.019	0.207	FALSE	-0.016	0.371	FALSE
832	CAPZB	-1.543	0.251	TRUE	-1.342	0.166	TRUE	-1.197	0.178	TRUE	-1.029	0.163	TRUE	-0.852	0.179	TRUE
29775	CARD10	-0.517	0.121	FALSE	-0.396	0.137	FALSE	-0.316	0.174	FALSE	-0.249	0.152	FALSE	-0.118	-0.057	FALSE
84433	CARD11	-0.519	0.075	FALSE	-0.429	0.119	FALSE	-0.326	0.067	FALSE	-0.271	0.024	FALSE	-0.161	0.064	FALSE
79092	CARD14	-0.511	0.14	FALSE	-0.445	0.187	FALSE	-0.364	0.207	FALSE	-0.289	0.242	FALSE	-0.174	0.247	FALSE
114769	CARD16	-0.334	-0.157	FALSE	-0.269	-0.152	FALSE	-0.213	-0.198	FALSE	-0.14	-0.241	FALSE	-0.035	-0.857	FALSE
440068	CARD17	-0.274	-0.052	FALSE	-0.21	-0.076	FALSE	-0.172	-0.064	FALSE	-0.105	-0.22	FALSE	-0.023	-0.72	FALSE
59082	CARD18	-0.367	0.321	FALSE	-0.288	0.375	FALSE	-0.22	0.408	FALSE	-0.087	0.207	FALSE	-0.023	-0.15	FALSE
84674	CARD6	-0.239	-0.053	FALSE	-0.167	-0.131	FALSE	-0.13	-0.179	FALSE	-0.071	-0.305	FALSE	-0.031	-0.611	FALSE
22900	CARD8	-0.48	0.134	FALSE	-0.383	0.188	FALSE	-0.286	0.122	FALSE	-0.21	0.159	FALSE	-0.049	-0.745	FALSE
64170	CARD9	-0.655	0.122	TRUE	-0.628	0.128	TRUE	-0.574	0.222	TRUE	-0.518	0.212	TRUE	-0.353	0.449	TRUE
79800	CARF	-0.3	-0.087	FALSE	-0.244	-0.13	FALSE	-0.211	-0.145	FALSE	-0.165	-0.145	FALSE	-0.073	-0.224	FALSE
23589	CARHSP1	-0.256	0.065	FALSE	-0.217	0.03	FALSE	-0.176	0.052	FALSE	-0.117	0.101	FALSE	-0.031	0.073	FALSE
10498	CARM1	-0.495	0.085	FALSE	-0.414	0.048	FALSE	-0.346	0.063	FALSE	-0.255	0.062	FALSE	-0.163	0.174	FALSE
55604	CARMIL1	-0.258	-0.25	FALSE	-0.231	-0.217	FALSE	-0.211	-0.225	FALSE	-0.169	-0.339	FALSE	-0.048	-0.805	FALSE
146206	CARMIL2	-0.532	-0.163	FALSE	-0.465	-0.106	FALSE	-0.373	-0.133	FALSE	-0.312	-0.224	FALSE	-0.18	-0.121	FALSE
833	CARS	-0.904	-0.075	TRUE	-0.828	-0.04	TRUE	-0.761	0.004	TRUE	-0.676	0.002	TRUE	-0.535	0.032	TRUE
79587	CARS2	-0.777	-0.095	TRUE	-0.633	-0.152	TRUE	-0.488	-0.192	TRUE	-0.431	-0.085	TRUE	-0.28	0.067	TRUE
9607	CARTPT	-0.686	-0.156	TRUE	-0.591	-0.201	TRUE	-0.537	-0.125	TRUE	-0.445	-0.033	TRUE	-0.267	0.207	TRUE
55259	CASC1	-0.355	0.168	FALSE	-0.27	0.121	FALSE	-0.217	0.156	FALSE	-0.152	0.144	FALSE	-0.045	0.212	FALSE
22794	CASC3	-0.359	0.142	FALSE	-0.295	0.161	FALSE	-0.226	0.117	FALSE	-0.166	0.143	FALSE	-0.082	0.135	FALSE
113201	CASC4	-0.145	0.261	FALSE	-0.094	0.195	FALSE	-0.037	0.25	FALSE	-0.028	0.402	FALSE	-0.024	0.426	FALSE
64921	CASD1	-0.375	0.183	FALSE	-0.327	0.18	FALSE	-0.252	0.205	FALSE	-0.177	0.178	FALSE	-0.102	0.122	FALSE
8573	CASK	-0.52	-0.03	FALSE	-0.414	-0.081	FALSE	-0.342	-0.083	FALSE	-0.269	-0.076	FALSE	-0.172	-0.051	FALSE
57524	CASKIN1	-0.213	-0.438	FALSE	-0.189	-0.423	FALSE	-0.149	-0.448	FALSE	-0.107	-0.5	FALSE	-0.052	-0.794	FALSE
57513	CASKIN2	-0.296	-0.24	FALSE	-0.195	-0.311	FALSE	-0.161	-0.332	FALSE	-0.115	-0.392	FALSE	-0.053	-0.797	FALSE
834	CASP1	-0.303	-0.028	FALSE	-0.226	0.063	FALSE	-0.146	0.031	FALSE	-0.089	0.03	FALSE	-0.024	0.098	FALSE
843	CASP10	-0.421	0.084	FALSE	-0.274	0.132	FALSE	-0.193	0.159	FALSE	-0.123	0.097	FALSE	-0.045	0.079	FALSE
23581	CASP14	-0.375	0.011	FALSE	-0.29	-0.005	FALSE	-0.215	0.023	FALSE	-0.14	0.053	FALSE	-0.053	0.147	FALSE
835	CASP2	-0.22	-0.011	FALSE	-0.176	-0.028	FALSE	-0.139	-0.006	FALSE	-0.103	0.017	FALSE	-0.02	-0.023	FALSE
836	CASP3	-0.277	-0.091	FALSE	-0.201	-0.049	FALSE	-0.123	-0.073	FALSE	-0.071	-0.069	FALSE	-0.023	-0.004	FALSE
837	CASP4	-0.32	-0.019	FALSE	-0.239	-0.006	FALSE	-0.188	-0.006	FALSE	-0.124	-0.039	FALSE	-0.05	-0.102	FALSE
838	CASP5	-0.275	-0.067	FALSE	-0.217	-0.028	FALSE	-0.166	-0.038	FALSE	-0.115	-0.025	FALSE	-0.042	-0.002	FALSE
839	CASP6	-0.536	-0.068	FALSE	-0.494	0	FALSE	-0.421	-0.019	FALSE	-0.351	0.026	FALSE	-0.239	0.061	FALSE
840	CASP7	-0.485	0.096	FALSE	-0.381	0.023	FALSE	-0.307	-0.01	FALSE	-0.252	-0.032	FALSE	-0.151	-0.193	FALSE
841	CASP8	-0.517	0.43	FALSE	-0.409	0.443	FALSE	-0.335	0.354	FALSE	-0.182	0.239	FALSE	-0.108	0.238	FALSE
842	CASP9	-0.347	0.249	FALSE	-0.279	0.271	FALSE	-0.204	0.27	FALSE	-0.144	0.318	FALSE	-0.042	0.387	FALSE
844	CASQ1	-0.296	-0.07	FALSE	-0.214	-0.053	FALSE	-0.147	-0.073	FALSE	-0.09	0.014	FALSE	-0.027	-0.002	FALSE
845	CASQ2	-0.288	0.058	FALSE	-0.227	0.073	FALSE	-0.151	0.087	FALSE	-0.104	0.121	FALSE	-0.036	0.211	FALSE
846	CASR	-0.877	-0.017	TRUE	-0.697	-0.039	TRUE	-0.578	-0.072	TRUE	-0.516	-0.067	TRUE	-0.388	-0.097	TRUE
831	CAST	-0.392	0.067	FALSE	-0.331	0.103	FALSE	-0.25	0.083	FALSE	-0.189	0.066	FALSE	-0.115	-0.001	FALSE
729438	CASTOR2	-0.913	-0.131	TRUE	-0.843	-0.034	TRUE	-0.713	0.022	TRUE	-0.602	0.145	TRUE	-0.477	0.73	TRUE
352954	CASTOR3	-0.357	-0.198	FALSE	-0.267	-0.177	FALSE	-0.197	-0.201	FALSE	-0.14	-0.227	FALSE	-0.068	-0.591	FALSE
54897	CASZ1	-0.237	0.118	FALSE	-0.181	0.203	FALSE	-0.132	0.255	FALSE	-0.096	0.271	FALSE	-0.057	0.384	FALSE
847	CAT	-0.335	-0.159	FALSE	-0.308	-0.092	FALSE	-0.254	-0.103	FALSE	-0.202	-0.117	FALSE	-0.125	-0.091	FALSE
117144	CATSPER1	-0.297	-0.003	FALSE	-0.265	0.057	FALSE	-0.217	0.04	FALSE	-0.168	0.083	FALSE	-0.064	-0.03	FALSE
347732	CATSPER3	-0.278	-0.095	FALSE	-0.19	-0.1	FALSE	-0.136	-0.065	FALSE	-0.097	0.008	FALSE	-0.048	0.185	FALSE
378807	CATSPER4	-0.354	-0.318	FALSE	-0.285	-0.369	FALSE	-0.253	-0.344	FALSE	-0.202	-0.438	FALSE	-0.095	-0.529	FALSE
79820	CATSPERB	-0.32	0.082	FALSE	-0.165	0.044	FALSE	-0.084	0.026	FALSE	-0.026	0.054	FALSE	-0.022	0.059	FALSE
257062	CATSPERD	-0.546	-0.187	TRUE	-0.501	-0.188	TRUE	-0.413	-0.268	TRUE	-0.365	-0.168	TRUE	-0.234	0.025	TRUE
257044	CATSPERE	-0.227	0.086	FALSE	-0.137	0.09	FALSE	-0.089	0.137	FALSE	-0.04	0.116	FALSE	-0.022	0.511	FALSE
57828	CATSPERG	-0.503	-0.072	FALSE	-0.407	-0.014	FALSE	-0.366	-0.014	FALSE	-0.286	-0.055	FALSE	-0.176	-0.15	FALSE
857	CAV1	-0.386	-0.07	FALSE	-0.304	-0.056	FALSE	-0.261	0.002	FALSE	-0.193	-0.037	FALSE	-0.122	-0.057	FALSE
858	CAV2	-0.307	0.214	FALSE	-0.247	0.229	FALSE	-0.205	0.241	FALSE	-0.132	0.288	FALSE	-0.026	0.305	FALSE
859	CAV3	-0.412	0.253	FALSE	-0.356	0.357	FALSE	-0.258	0.365	FALSE	-0.177	0.382	FALSE	-0.074	0.511	FALSE
284119	CAVIN1	-0.407	0.27	FALSE	-0.296	0.296	FALSE	-0.24	0.353	FALSE	-0.149	0.377	FALSE	-0.031	0.4	FALSE
8436	CAVIN2	-0.496	0.106	FALSE	-0.287	0.074	FALSE	-0.199	0.034	FALSE	-0.119	-0.106	FALSE	-0.023	-0.851	FALSE
112464	CAVIN3	-0.286	0.112	FALSE	-0.249	0.097	FALSE	-0.195	0.089	FALSE	-0.159	0.038	FALSE	-0.06	0.058	FALSE
347273	CAVIN4	-0.147	-0.192	FALSE	-0.09	-0.21	FALSE	-0.048	-0.259	FALSE	-0.025	-0.221	FALSE	-0.022	-0.132	FALSE
9139	CBFA2T2	-0.663	-0.014	TRUE	-0.567	-0.02	TRUE	-0.513	-0.033	TRUE	-0.434	-0.026	TRUE	-0.335	0.03	TRUE
863	CBFA2T3	-0.442	-0.121	FALSE	-0.314	-0.142	FALSE	-0.275	-0.128	FALSE	-0.207	-0.132	FALSE	-0.125	-0.138	FALSE
865	CBFB	-0.882	0.379	TRUE	-0.67	0.36	TRUE	-0.396	0.257	TRUE	-0.228	0.196	TRUE	-0.108	0.221	TRUE
867	CBL	-0.476	0.095	FALSE	-0.302	0.005	FALSE	-0.237	0.019	FALSE	-0.149	-0.045	FALSE	-0.061	0.037	FALSE
868	CBLB	-0.467	0.216	FALSE	-0.401	0.196	FALSE	-0.31	0.241	FALSE	-0.22	0.308	FALSE	-0.084	0.444	FALSE
23624	CBLC	-0.192	-0.14	FALSE	-0.156	-0.16	FALSE	-0.116	-0.13	FALSE	-0.08	-0.068	FALSE	-0.017	0.018	FALSE
79872	CBLL1	-0.637	0.246	TRUE	-0.556	0.269	TRUE	-0.488	0.3	TRUE	-0.401	0.354	TRUE	-0.256	0.319	TRUE
158506	CBLL2	-0.233	0.265	FALSE	-0.15	0.336	FALSE	-0.076	0.451	FALSE	-0.027	0.412	FALSE	-0.022	0.902	FALSE
869	CBLN1	-0.321	-0.08	FALSE	-0.258	-0.045	FALSE	-0.206	-0.047	FALSE	-0.164	0.013	FALSE	-0.078	0.069	FALSE
147381	CBLN2	-0.164	0.063	FALSE	-0.128	0.068	FALSE	-0.064	0.065	FALSE	-0.028	0.11	FALSE	-0.011	0.384	FALSE
643866	CBLN3	-0.272	-0.165	FALSE	-0.183	-0.199	FALSE	-0.117	-0.25	FALSE	-0.078	-0.244	FALSE	-0.035	-0.335	FALSE
140689	CBLN4	-0.358	-0.101	FALSE	-0.292	-0.1	FALSE	-0.236	-0.078	FALSE	-0.165	-0.153	FALSE	-0.069	-0.278	FALSE
873	CBR1	-0.439	0.04	FALSE	-0.37	0.123	FALSE	-0.306	0.119	FALSE	-0.249	0.201	FALSE	-0.149	0.25	FALSE
874	CBR3	-0.32	0.012	FALSE	-0.26	0.059	FALSE	-0.217	0.032	FALSE	-0.172	0.048	FALSE	-0.087	0.089	FALSE
84869	CBR4	-0.648	0.105	TRUE	-0.59	0.114	TRUE	-0.541	0.122	TRUE	-0.44	0.146	TRUE	-0.315	0.127	TRUE
55871	CBWD1	-0.613	-0.093	TRUE	-0.518	-0.069	TRUE	-0.472	-0.039	TRUE	-0.39	-0.066	TRUE	-0.248	0.074	TRUE
150472	CBWD2	-0.361	-0.031	FALSE	-0.326	-0.047	FALSE	-0.298	-0.007	FALSE	-0.268	0.006	FALSE	-0.177	0.081	FALSE
10951	CBX1	-0.22	-0.094	FALSE	-0.177	-0.051	FALSE	-0.152	0.02	FALSE	-0.121	0.073	FALSE	-0.043	0.11	FALSE
84733	CBX2	-0.484	-0.111	FALSE	-0.422	-0.142	FALSE	-0.372	-0.116	FALSE	-0.319	-0.105	FALSE	-0.217	-0.115	FALSE
11335	CBX3	-0.4	-0.132	FALSE	-0.336	-0.14	FALSE	-0.281	-0.122	FALSE	-0.211	-0.132	FALSE	-0.135	-0.08	FALSE
8535	CBX4	-0.426	0.082	FALSE	-0.312	0.051	FALSE	-0.255	0.021	FALSE	-0.204	0.054	FALSE	-0.084	0.036	FALSE
23468	CBX5	-0.508	-0.062	FALSE	-0.436	-0.117	FALSE	-0.364	-0.087	FALSE	-0.298	-0.064	FALSE	-0.189	0.006	FALSE
23466	CBX6	-0.363	-0.13	FALSE	-0.299	-0.114	FALSE	-0.245	-0.107	FALSE	-0.194	-0.187	FALSE	-0.12	-0.164	FALSE
23492	CBX7	-0.536	0.096	FALSE	-0.435	0.022	FALSE	-0.396	0.021	FALSE	-0.299	-0.005	FALSE	-0.197	-0.015	FALSE
57332	CBX8	-0.398	-0.087	FALSE	-0.286	-0.127	FALSE	-0.223	-0.113	FALSE	-0.156	-0.117	FALSE	-0.068	-0.061	FALSE
54862	CC2D1A	-0.896	-0.101	TRUE	-0.837	-0.037	TRUE	-0.772	0.063	TRUE	-0.691	0.227	TRUE	-0.527	0.507	TRUE
55749	CCAR1	-0.833	0.044	TRUE	-0.674	-0.007	TRUE	-0.583	-0.06	TRUE	-0.494	-0.068	TRUE	-0.405	-0.055	TRUE
57805	CCAR2	-0.547	0.018	TRUE	-0.458	0.057	TRUE	-0.343	0.08	TRUE	-0.249	0.091	TRUE	-0.159	0.193	TRUE
147372	CCBE1	-0.429	0.222	FALSE	-0.338	0.282	FALSE	-0.273	0.304	FALSE	-0.167	0.342	FALSE	-0.062	0.505	FALSE
79839	CCDC102B	-0.48	0.045	FALSE	-0.351	0.037	FALSE	-0.275	0.008	FALSE	-0.17	-0.065	FALSE	-0.034	-0.858	FALSE
256309	CCDC110	-0.297	-0.127	FALSE	-0.242	-0.169	FALSE	-0.184	-0.203	FALSE	-0.117	-0.253	FALSE	-0.025	-0.838	FALSE
153733	CCDC112	-0.568	-0.014	TRUE	-0.351	-0.147	TRUE	-0.311	-0.172	TRUE	-0.237	-0.28	TRUE	-0.112	-0.44	TRUE
29070	CCDC113	-0.224	0.041	FALSE	-0.17	0.022	FALSE	-0.117	-0.044	FALSE	-0.055	-0.096	FALSE	-0.03	-0.301	FALSE
93233	CCDC114	-0.701	-0.254	TRUE	-0.523	-0.273	TRUE	-0.245	-0.513	TRUE	-0.127	-0.673	TRUE	-0.076	-0.724	TRUE
84317	CCDC115	-0.543	0.119	FALSE	-0.5	0.106	FALSE	-0.473	0.185	FALSE	-0.423	0.257	FALSE	-0.364	0.641	FALSE
164592	CCDC116	-0.331	0.149	FALSE	-0.218	0.169	FALSE	-0.147	0.15	FALSE	-0.044	0.069	FALSE	-0.027	-0.095	FALSE
150275	CCDC117	-0.347	-0.009	FALSE	-0.281	-0.126	FALSE	-0.254	-0.124	FALSE	-0.173	-0.247	FALSE	-0.06	-0.738	FALSE
151903	CCDC12	-0.415	0.267	FALSE	-0.292	0.268	FALSE	-0.246	0.397	FALSE	-0.166	0.472	FALSE	-0.074	0.789	FALSE
79635	CCDC121	-0.218	0.181	FALSE	-0.144	0.154	FALSE	-0.074	0.18	FALSE	-0.032	0.211	FALSE	-0.026	0.305	FALSE
160857	CCDC122	-0.175	0.083	FALSE	-0.089	0.017	FALSE	-0.025	-0.044	FALSE	-0.022	0.056	FALSE	-0.02	0.1	FALSE
90693	CCDC126	-0.414	0.011	FALSE	-0.312	-0.111	FALSE	-0.249	-0.074	FALSE	-0.188	-0.115	FALSE	-0.092	-0.3	FALSE
64753	CCDC136	-0.301	-0.06	FALSE	-0.22	-0.097	FALSE	-0.176	-0.206	FALSE	-0.124	-0.277	FALSE	-0.029	-0.908	FALSE
165055	CCDC138	-0.275	0.023	FALSE	-0.16	-0.067	FALSE	-0.117	-0.108	FALSE	-0.063	-0.18	FALSE	-0.026	-0.356	FALSE
64770	CCDC14	-0.245	-0.066	FALSE	-0.158	-0.191	FALSE	-0.11	-0.216	FALSE	-0.058	-0.211	FALSE	-0.026	-0.589	FALSE
151278	CCDC140	-0.405	-0.116	FALSE	-0.337	-0.147	FALSE	-0.266	-0.141	FALSE	-0.191	-0.312	FALSE	-0.057	-0.743	FALSE
9720	CCDC144A	-0.27	0.071	FALSE	-0.209	0.1	FALSE	-0.166	0.155	FALSE	-0.123	0.242	FALSE	-0.056	0.489	FALSE
339184	CCDC144NL	-0.246	0.191	FALSE	-0.185	0.238	FALSE	-0.155	0.27	FALSE	-0.125	0.333	FALSE	-0.082	0.495	FALSE
57639	CCDC146	-0.544	0.129	FALSE	-0.469	0.192	FALSE	-0.398	0.175	FALSE	-0.329	0.184	FALSE	-0.185	0.059	FALSE
130940	CCDC148	-0.227	-0.051	FALSE	-0.133	-0.082	FALSE	-0.084	-0.146	FALSE	-0.029	-0.344	FALSE	-0.021	-0.478	FALSE
91050	CCDC149	-0.317	0.207	FALSE	-0.133	0.152	FALSE	-0.062	0.177	FALSE	-0.023	0.118	FALSE	-0.02	0.189	FALSE
284992	CCDC150	-0.229	0.161	FALSE	-0.172	0.152	FALSE	-0.086	0.096	FALSE	-0.028	0.064	FALSE	-0.022	0.062	FALSE
115948	CCDC151	-0.586	-0.209	TRUE	-0.526	-0.235	TRUE	-0.486	-0.179	TRUE	-0.42	-0.071	TRUE	-0.275	0.222	TRUE
147872	CCDC155	-0.478	-0.044	FALSE	-0.382	-0.061	FALSE	-0.293	-0.085	FALSE	-0.233	-0.081	FALSE	-0.146	-0.251	FALSE
154467	CCDC167	-0.185	-0.046	FALSE	-0.161	-0.011	FALSE	-0.117	-0.02	FALSE	-0.067	-0.099	FALSE	-0.025	-0.283	FALSE
728591	CCDC169	-0.515	-0.059	FALSE	-0.466	-0.028	FALSE	-0.384	-0.028	FALSE	-0.309	-0.051	FALSE	-0.162	-0.18	FALSE
149483	CCDC17	-0.245	-0.201	FALSE	-0.203	-0.243	FALSE	-0.164	-0.244	FALSE	-0.131	-0.271	FALSE	-0.049	-0.796	FALSE
80129	CCDC170	-0.381	-0.25	FALSE	-0.313	-0.282	FALSE	-0.264	-0.289	FALSE	-0.202	-0.369	FALSE	-0.111	-0.4	FALSE
203238	CCDC171	-0.557	0.015	TRUE	-0.508	0.082	TRUE	-0.453	0.125	TRUE	-0.352	0.069	TRUE	-0.217	0.029	TRUE
374355	CCDC172	-0.477	0.075	FALSE	-0.296	-0.006	FALSE	-0.225	-0.052	FALSE	-0.152	-0.229	FALSE	-0.024	-0.91	FALSE
374864	CCDC178	-0.502	-0.218	FALSE	-0.378	-0.282	FALSE	-0.301	-0.34	FALSE	-0.247	-0.355	FALSE	-0.15	-0.25	FALSE
100499483	CCDC180	-0.502	-0.151	FALSE	-0.391	-0.175	FALSE	-0.331	-0.229	FALSE	-0.255	-0.351	FALSE	-0.147	-0.31	FALSE
57821	CCDC181	-0.342	0.018	FALSE	-0.288	-0.076	FALSE	-0.243	-0.062	FALSE	-0.16	-0.167	FALSE	-0.047	-0.809	FALSE
84960	CCDC183	-0.201	-0.124	FALSE	-0.145	-0.198	FALSE	-0.117	-0.213	FALSE	-0.068	-0.281	FALSE	-0.022	-0.547	FALSE
55088	CCDC186	-0.318	-0.106	FALSE	-0.267	-0.109	FALSE	-0.198	-0.234	FALSE	-0.143	-0.349	FALSE	-0.036	-0.83	FALSE
90835	CCDC189	-0.201	0.006	FALSE	-0.101	-0.052	FALSE	-0.073	-0.109	FALSE	-0.046	-0.152	FALSE	-0.028	-0.185	FALSE
339512	CCDC190	-0.223	-0.089	FALSE	-0.185	-0.076	FALSE	-0.111	-0.093	FALSE	-0.063	-0.167	FALSE	-0.027	-0.427	FALSE
57577	CCDC191	-0.527	0.101	FALSE	-0.398	0.135	FALSE	-0.243	0.118	FALSE	-0.133	0.061	FALSE	-0.033	-0.487	FALSE
55195	CCDC198	-0.327	0.06	FALSE	-0.176	0.018	FALSE	-0.112	0.025	FALSE	-0.047	-0.002	FALSE	-0.028	-0.097	FALSE
28952	CCDC22	-0.724	-0.24	TRUE	-0.642	-0.175	TRUE	-0.567	-0.11	TRUE	-0.482	-0.005	TRUE	-0.33	0.301	TRUE
55246	CCDC25	-0.282	0.008	FALSE	-0.203	0.091	FALSE	-0.124	0.099	FALSE	-0.059	0.029	FALSE	-0.027	-0.072	FALSE
148870	CCDC27	-0.219	-0.046	FALSE	-0.112	-0.059	FALSE	-0.083	-0.117	FALSE	-0.044	-0.091	FALSE	-0.028	-0.079	FALSE
25901	CCDC28A	-0.246	0.145	FALSE	-0.135	0.116	FALSE	-0.06	0.134	FALSE	-0.023	0.156	FALSE	-0.018	0.645	FALSE
79140	CCDC28B	-0.288	0.036	FALSE	-0.226	-0.072	FALSE	-0.166	-0.149	FALSE	-0.1	-0.209	FALSE	-0.04	-0.638	FALSE
83643	CCDC3	-0.374	0.077	FALSE	-0.273	0.116	FALSE	-0.189	0.096	FALSE	-0.093	0.071	FALSE	-0.022	-0.383	FALSE
91057	CCDC34	-0.426	-0.108	FALSE	-0.353	-0.188	FALSE	-0.299	-0.247	FALSE	-0.238	-0.335	FALSE	-0.113	-0.428	FALSE
339834	CCDC36	-0.4	-0.109	FALSE	-0.314	-0.123	FALSE	-0.237	-0.159	FALSE	-0.176	-0.14	FALSE	-0.096	-0.203	FALSE
120935	CCDC38	-0.301	-0.01	FALSE	-0.25	-0.035	FALSE	-0.176	-0.071	FALSE	-0.102	-0.114	FALSE	-0.037	-0.468	FALSE
146849	CCDC42	-0.157	0.108	FALSE	-0.039	0.108	FALSE	-0.022	0.177	FALSE	-0.02	0.342	FALSE	-0.017	0.642	FALSE
57003	CCDC47	-0.239	-0.074	FALSE	-0.186	-0.04	FALSE	-0.141	-0.037	FALSE	-0.075	-0.015	FALSE	-0.025	0.16	FALSE
152137	CCDC50	-0.203	-0.017	FALSE	-0.157	-0.011	FALSE	-0.107	-0.084	FALSE	-0.051	-0.114	FALSE	-0.026	-0.343	FALSE
79714	CCDC51	-0.609	-0.085	TRUE	-0.524	-0.074	TRUE	-0.448	-0.098	TRUE	-0.324	-0.211	TRUE	-0.187	-0.095	TRUE
84692	CCDC54	-0.474	-0.002	FALSE	-0.369	0.011	FALSE	-0.276	-0.03	FALSE	-0.174	-0.163	FALSE	-0.021	-0.898	FALSE
131076	CCDC58	-0.376	-0.177	FALSE	-0.362	-0.125	FALSE	-0.289	-0.254	FALSE	-0.218	-0.386	FALSE	-0.126	-0.43	FALSE
8030	CCDC6	-0.479	0.26	FALSE	-0.407	0.318	FALSE	-0.303	0.272	FALSE	-0.221	0.319	FALSE	-0.118	0.27	FALSE
160777	CCDC60	-0.323	0.258	FALSE	-0.245	0.321	FALSE	-0.18	0.352	FALSE	-0.068	0.354	FALSE	-0.024	0.158	FALSE
84660	CCDC62	-0.42	-0.243	FALSE	-0.386	-0.18	FALSE	-0.368	-0.163	FALSE	-0.285	-0.28	FALSE	-0.145	-0.315	FALSE
160762	CCDC63	-0.156	-0.356	FALSE	-0.129	-0.362	FALSE	-0.098	-0.332	FALSE	-0.065	-0.405	FALSE	-0.031	-0.62	FALSE
85478	CCDC65	-0.228	-0.157	FALSE	-0.136	-0.138	FALSE	-0.099	-0.155	FALSE	-0.047	-0.232	FALSE	-0.028	-0.272	FALSE
285331	CCDC66	-0.285	-0.312	FALSE	-0.236	-0.294	FALSE	-0.184	-0.303	FALSE	-0.117	-0.362	FALSE	-0.029	-0.882	FALSE
[truncated: 13,848 more rows]

## Sheet: S80_C20
EntrezID	GeneSymbol	q1.efficacy	q1.selectivity	q1.isEssential	q2.5.efficacy	q2.5.selectivity	q2.5.isEssential	q5.efficacy	q5.selectivity	q5.isEssential	q10.efficacy	q10.selectivity	q10.isEssential	q25.efficacy	q25.selectivity	q25.isEssential
1	A1BG	-0.36	0.164	FALSE	-0.274	0.17	FALSE	-0.229	0.187	FALSE	-0.151	0.085	FALSE	-0.074	-0.068	FALSE
29974	A1CF	-0.39	0.116	FALSE	-0.331	0.148	FALSE	-0.268	0.123	FALSE	-0.202	0.116	FALSE	-0.126	0.128	FALSE
2	A2M	-0.406	-0.028	FALSE	-0.321	-0.02	FALSE	-0.293	-0.053	FALSE	-0.23	-0.074	FALSE	-0.14	-0.093	FALSE
144568	A2ML1	-0.281	0.574	FALSE	-0.183	0.629	FALSE	-0.127	0.695	FALSE	-0.052	0.805	FALSE	0.018	1.173	FALSE
53947	A4GALT	-0.315	0.161	FALSE	-0.239	0.154	FALSE	-0.178	0.147	FALSE	-0.12	0.086	FALSE	-0.048	0.122	FALSE
51146	A4GNT	-0.245	-0.109	FALSE	-0.171	-0.109	FALSE	-0.129	-0.099	FALSE	-0.08	-0.137	FALSE	-0.028	-0.18	FALSE
8086	AAAS	-0.719	0.022	TRUE	-0.557	-0.017	TRUE	-0.476	-0.034	TRUE	-0.411	-0.037	TRUE	-0.307	-0.008	TRUE
65985	AACS	-0.373	0.14	FALSE	-0.346	0.27	FALSE	-0.231	0.264	FALSE	-0.135	0.236	FALSE	-0.042	0.164	FALSE
13	AADAC	-0.443	0.259	TRUE	-0.386	0.349	TRUE	-0.327	0.466	TRUE	-0.24	0.512	TRUE	-0.116	0.465	TRUE
344752	AADACL2	-0.363	0.016	FALSE	-0.315	-0.007	FALSE	-0.24	-0.042	FALSE	-0.169	-0.111	FALSE	-0.042	-0.419	FALSE
343066	AADACL4	-0.308	0.063	FALSE	-0.221	-0.034	FALSE	-0.179	-0.055	FALSE	-0.113	-0.221	FALSE	-0.052	-0.537	FALSE
51166	AADAT	-0.269	0.4	FALSE	-0.209	0.383	FALSE	-0.166	0.402	FALSE	-0.112	0.428	FALSE	-0.02	0.528	FALSE
195827	PRXL2C	-0.32	0.005	FALSE	-0.211	-0.014	FALSE	-0.18	0.025	FALSE	-0.113	-0.017	FALSE	-0.048	-0.413	FALSE
79719	AAGAB	-0.326	-0.248	FALSE	-0.273	-0.258	FALSE	-0.227	-0.28	FALSE	-0.166	-0.321	FALSE	-0.077	-0.391	FALSE
22848	AAK1	-0.212	-0.142	FALSE	-0.18	-0.161	FALSE	-0.142	-0.15	FALSE	-0.111	-0.106	FALSE	-0.047	-0.123	FALSE
28971	AAMDC	-0.287	-0.137	FALSE	-0.266	-0.096	FALSE	-0.222	-0.139	FALSE	-0.158	-0.244	FALSE	-0.073	-0.434	FALSE
14	AAMP	-1.174	0.081	TRUE	-1.08	0.149	TRUE	-0.99	0.17	TRUE	-0.861	0.213	TRUE	-0.651	0.246	TRUE
15	AANAT	-0.325	0.031	FALSE	-0.298	0.011	FALSE	-0.238	-0.024	FALSE	-0.173	-0.064	FALSE	-0.109	-0.081	FALSE
25980	AAR2	-0.302	0.036	FALSE	-0.248	0.037	FALSE	-0.206	0.003	FALSE	-0.137	-0.031	FALSE	-0.059	-0.407	FALSE
441376	AARD	-0.21	0.205	FALSE	-0.148	0.186	FALSE	-0.115	0.235	FALSE	-0.094	0.381	FALSE	-0.067	0.791	FALSE
16	AARS	-0.987	-0.01	TRUE	-0.926	0.064	TRUE	-0.873	0.12	TRUE	-0.816	0.241	TRUE	-0.617	0.307	TRUE
57505	AARS2	-0.646	0.007	TRUE	-0.588	0.038	TRUE	-0.529	0.015	TRUE	-0.458	0.034	TRUE	-0.361	0.041	TRUE
132949	AASDH	-0.358	0.163	FALSE	-0.28	0.123	FALSE	-0.227	0.195	FALSE	-0.166	0.174	FALSE	-0.065	0.091	FALSE
60496	AASDHPPT	-0.396	0.054	FALSE	-0.357	0.105	FALSE	-0.317	0.168	FALSE	-0.268	0.219	FALSE	-0.184	0.425	FALSE
10157	AASS	-0.294	-0.097	FALSE	-0.231	-0.103	FALSE	-0.191	-0.102	FALSE	-0.145	-0.071	FALSE	-0.067	-0.188	FALSE
26574	AATF	-0.748	-0.131	TRUE	-0.683	-0.111	TRUE	-0.605	-0.125	TRUE	-0.537	-0.133	TRUE	-0.448	-0.165	TRUE
9625	AATK	-0.534	0.051	TRUE	-0.471	0.005	TRUE	-0.392	-0.006	TRUE	-0.344	0.027	TRUE	-0.252	0.008	TRUE
18	ABAT	-0.308	-0.035	FALSE	-0.289	0.056	FALSE	-0.262	0.091	FALSE	-0.178	0.063	FALSE	-0.099	-0.004	FALSE
19	ABCA1	-0.527	0.347	TRUE	-0.417	0.368	TRUE	-0.365	0.354	TRUE	-0.302	0.332	TRUE	-0.2	0.271	TRUE
10349	ABCA10	-0.357	-0.034	FALSE	-0.322	0.002	FALSE	-0.279	0.021	FALSE	-0.215	-0.001	FALSE	-0.141	0.088	FALSE
26154	ABCA12	-0.403	0.082	FALSE	-0.347	0.118	FALSE	-0.288	0.13	FALSE	-0.24	0.082	FALSE	-0.167	0.123	FALSE
154664	ABCA13	-0.261	0.061	FALSE	-0.218	0.149	FALSE	-0.142	0.185	FALSE	-0.087	0.203	FALSE	0.001	0.13	FALSE
20	ABCA2	-0.311	-0.048	FALSE	-0.227	-0.074	FALSE	-0.184	-0.07	FALSE	-0.128	-0.116	FALSE	-0.075	-0.061	FALSE
21	ABCA3	-0.376	0.155	FALSE	-0.277	0.054	FALSE	-0.233	0.014	FALSE	-0.179	0.093	FALSE	-0.095	0.133	FALSE
24	ABCA4	-0.322	0.224	FALSE	-0.29	0.216	FALSE	-0.223	0.209	FALSE	-0.169	0.242	FALSE	-0.083	0.289	FALSE
23461	ABCA5	-0.298	0.262	FALSE	-0.219	0.137	FALSE	-0.181	0.207	FALSE	-0.114	0.26	FALSE	-0.017	0.147	FALSE
23460	ABCA6	-0.193	-0.16	FALSE	-0.161	-0.117	FALSE	-0.104	-0.144	FALSE	-0.068	-0.13	FALSE	-0.017	-0.113	FALSE
10347	ABCA7	-0.246	-0.003	FALSE	-0.183	-0.059	FALSE	-0.126	-0.042	FALSE	-0.077	-0.057	FALSE	-0.016	-0.064	FALSE
10351	ABCA8	-0.179	-0.105	FALSE	-0.154	-0.097	FALSE	-0.122	-0.14	FALSE	-0.092	-0.082	FALSE	-0.042	-0.111	FALSE
10350	ABCA9	-0.157	0.056	FALSE	-0.122	0.1	FALSE	-0.074	0.076	FALSE	-0.022	0.101	FALSE	0.027	0.14	FALSE
5243	ABCB1	-0.213	-0.138	FALSE	-0.163	-0.121	FALSE	-0.132	-0.108	FALSE	-0.101	-0.058	FALSE	-0.044	-0.071	FALSE
23456	ABCB10	-0.574	0.102	TRUE	-0.479	0.101	TRUE	-0.377	0.076	TRUE	-0.321	0.066	TRUE	-0.239	0.106	TRUE
8647	ABCB11	-0.45	0.077	TRUE	-0.299	0	TRUE	-0.232	-0.05	TRUE	-0.195	-0.046	TRUE	-0.131	0.025	TRUE
5244	ABCB4	-0.418	0.077	FALSE	-0.363	0.042	FALSE	-0.302	0.009	FALSE	-0.233	0.002	FALSE	-0.148	-0.024	FALSE
340273	ABCB5	-0.512	0.34	TRUE	-0.461	0.454	TRUE	-0.356	0.464	TRUE	-0.261	0.444	TRUE	-0.148	0.538	TRUE
10058	ABCB6	-0.221	-0.153	FALSE	-0.183	-0.175	FALSE	-0.154	-0.156	FALSE	-0.116	-0.104	FALSE	-0.06	-0.072	FALSE
22	ABCB7	-1.511	-0.03	TRUE	-1.373	-0.021	TRUE	-1.273	0.011	TRUE	-1.11	-0.015	TRUE	-0.942	0.02	TRUE
11194	ABCB8	-0.217	0.052	FALSE	-0.175	0.106	FALSE	-0.103	0.092	FALSE	-0.055	0.106	FALSE	0.008	0.253	FALSE
23457	ABCB9	-0.576	0.012	TRUE	-0.511	0.021	TRUE	-0.456	0.023	TRUE	-0.377	0.027	TRUE	-0.278	0.047	TRUE
4363	ABCC1	-0.229	0.102	FALSE	-0.174	0.017	FALSE	-0.139	0.051	FALSE	-0.089	0.076	FALSE	-0.013	0.051	FALSE
89845	ABCC10	-0.21	0.104	FALSE	-0.191	0.138	FALSE	-0.127	0.202	FALSE	-0.061	0.225	FALSE	0.01	0.255	FALSE
85320	ABCC11	-0.245	-0.117	FALSE	-0.213	-0.072	FALSE	-0.148	-0.046	FALSE	-0.095	-0.039	FALSE	-0.021	-0.076	FALSE
94160	ABCC12	-0.279	-0.017	FALSE	-0.235	-0.003	FALSE	-0.192	-0.018	FALSE	-0.149	0.003	FALSE	-0.08	0.138	FALSE
1244	ABCC2	-0.276	-0.073	FALSE	-0.229	-0.033	FALSE	-0.193	0.016	FALSE	-0.148	-0.006	FALSE	-0.096	0.086	FALSE
8714	ABCC3	-0.426	0.179	TRUE	-0.352	0.182	TRUE	-0.301	0.166	TRUE	-0.247	0.229	TRUE	-0.148	0.223	TRUE
10257	ABCC4	-0.38	-0.157	FALSE	-0.305	-0.155	FALSE	-0.267	-0.099	FALSE	-0.213	-0.04	FALSE	-0.144	0.073	FALSE
10057	ABCC5	-0.29	-0.081	FALSE	-0.252	-0.035	FALSE	-0.222	0.017	FALSE	-0.181	0.093	FALSE	-0.104	0.137	FALSE
368	ABCC6	-0.261	-0.172	FALSE	-0.21	-0.136	FALSE	-0.167	-0.135	FALSE	-0.127	-0.083	FALSE	-0.069	-0.05	FALSE
6833	ABCC8	-0.293	0.03	FALSE	-0.236	0.087	FALSE	-0.201	0.151	FALSE	-0.147	0.166	FALSE	-0.062	0.233	FALSE
10060	ABCC9	-0.267	0.172	FALSE	-0.205	0.248	FALSE	-0.12	0.232	FALSE	-0.068	0.239	FALSE	-0.002	0.344	FALSE
215	ABCD1	-0.732	0.255	TRUE	-0.66	0.257	TRUE	-0.606	0.312	TRUE	-0.525	0.306	TRUE	-0.386	0.335	TRUE
225	ABCD2	-0.334	-0.076	FALSE	-0.283	-0.094	FALSE	-0.25	-0.051	FALSE	-0.201	-0.013	FALSE	-0.117	-0.001	FALSE
5825	ABCD3	-0.319	0.12	FALSE	-0.27	0.226	FALSE	-0.216	0.236	FALSE	-0.171	0.303	FALSE	-0.073	0.395	FALSE
5826	ABCD4	-0.318	-0.18	FALSE	-0.265	-0.194	FALSE	-0.24	-0.153	FALSE	-0.205	-0.17	FALSE	-0.133	-0.189	FALSE
6059	ABCE1	-2.088	0.125	TRUE	-1.893	0.186	TRUE	-1.73	0.252	TRUE	-1.607	0.366	TRUE	-1.385	0.026	TRUE
23	ABCF1	-0.953	0.006	TRUE	-0.771	-0.111	TRUE	-0.711	-0.156	TRUE	-0.64	-0.169	TRUE	-0.538	-0.262	TRUE
10061	ABCF2	-0.309	-0.094	FALSE	-0.24	-0.102	FALSE	-0.204	-0.097	FALSE	-0.167	-0.053	FALSE	-0.093	-0.122	FALSE
55324	ABCF3	-0.372	-0.006	FALSE	-0.292	-0.058	FALSE	-0.219	-0.092	FALSE	-0.188	-0.074	FALSE	-0.106	-0.099	FALSE
9619	ABCG1	-0.425	-0.016	TRUE	-0.359	-0.026	TRUE	-0.323	-0.026	TRUE	-0.272	-0.061	TRUE	-0.195	-0.139	TRUE
9429	ABCG2	-0.277	-0.093	FALSE	-0.252	-0.042	FALSE	-0.22	0.02	FALSE	-0.158	0.025	FALSE	-0.084	0.02	FALSE
64137	ABCG4	-0.229	-0.018	FALSE	-0.184	-0.001	FALSE	-0.151	0.034	FALSE	-0.114	0.084	FALSE	-0.035	0.081	FALSE
64240	ABCG5	-0.274	0.013	FALSE	-0.193	-0.049	FALSE	-0.152	-0.045	FALSE	-0.112	-0.082	FALSE	-0.075	-0.009	FALSE
64241	ABCG8	-0.266	-0.154	FALSE	-0.217	-0.144	FALSE	-0.184	-0.119	FALSE	-0.131	-0.148	FALSE	-0.06	-0.173	FALSE
55347	ABHD10	-0.45	0.103	TRUE	-0.393	0.168	TRUE	-0.331	0.228	TRUE	-0.279	0.205	TRUE	-0.146	0.117	TRUE
83451	ABHD11	-0.417	0.131	FALSE	-0.377	0.237	FALSE	-0.325	0.222	FALSE	-0.284	0.323	FALSE	-0.199	0.488	FALSE
26090	ABHD12	-0.868	0.358	TRUE	-0.73	0.379	TRUE	-0.663	0.442	TRUE	-0.57	0.531	TRUE	-0.381	0.883	TRUE
145447	ABHD12B	-0.259	-0.083	FALSE	-0.215	-0.119	FALSE	-0.181	-0.133	FALSE	-0.137	-0.178	FALSE	-0.078	-0.237	FALSE
84945	ABHD13	-0.445	-0.038	TRUE	-0.347	-0.083	TRUE	-0.296	-0.072	TRUE	-0.221	-0.075	TRUE	-0.133	-0.066	TRUE
25864	ABHD14A	-0.263	0.257	FALSE	-0.178	0.043	FALSE	-0.136	0.11	FALSE	-0.081	0.105	FALSE	-0.035	0.257	FALSE
84836	ABHD14B	-0.26	0.065	FALSE	-0.185	0.01	FALSE	-0.134	0.031	FALSE	-0.085	0.033	FALSE	-0.032	0.002	FALSE
116236	ABHD15	-0.368	-0.154	FALSE	-0.319	-0.171	FALSE	-0.277	-0.171	FALSE	-0.233	-0.195	FALSE	-0.128	-0.323	FALSE
7920	ABHD16A	-0.323	-0.206	FALSE	-0.265	-0.256	FALSE	-0.236	-0.265	FALSE	-0.204	-0.278	FALSE	-0.152	-0.243	FALSE
140701	ABHD16B	-0.209	-0.159	FALSE	-0.169	-0.24	FALSE	-0.136	-0.222	FALSE	-0.102	-0.223	FALSE	-0.046	-0.315	FALSE
81926	ABHD17A	-0.373	-0.023	FALSE	-0.335	-0.008	FALSE	-0.302	-0.021	FALSE	-0.272	-0.075	FALSE	-0.203	-0.154	FALSE
51104	ABHD17B	-0.222	0.31	FALSE	-0.143	0.439	FALSE	-0.078	0.383	FALSE	-0.031	0.458	FALSE	0.013	0.69	FALSE
11057	ABHD2	-0.391	-0.116	FALSE	-0.334	-0.12	FALSE	-0.283	-0.139	FALSE	-0.23	-0.171	FALSE	-0.171	-0.104	FALSE
171586	ABHD3	-0.326	-0.083	FALSE	-0.257	-0.2	FALSE	-0.216	-0.184	FALSE	-0.172	-0.22	FALSE	-0.102	-0.302	FALSE
63874	ABHD4	-0.353	0.046	FALSE	-0.259	0.1	FALSE	-0.209	0.085	FALSE	-0.15	0.077	FALSE	-0.063	-0.108	FALSE
51099	ABHD5	-0.376	0.029	FALSE	-0.287	-0.022	FALSE	-0.232	-0.027	FALSE	-0.174	-0.058	FALSE	-0.087	-0.149	FALSE
57406	ABHD6	-0.192	0.005	FALSE	-0.134	0.002	FALSE	-0.104	-0.033	FALSE	-0.069	-0.144	FALSE	-0.025	-0.561	FALSE
79575	ABHD8	-0.183	-0.154	FALSE	-0.145	-0.119	FALSE	-0.114	-0.116	FALSE	-0.072	-0.164	FALSE	-0.035	-0.126	FALSE
10006	ABI1	-0.492	0.068	TRUE	-0.416	0.051	TRUE	-0.352	0.079	TRUE	-0.231	0.046	TRUE	-0.111	-0.051	TRUE
10152	ABI2	-0.359	-0.117	FALSE	-0.186	-0.23	FALSE	-0.144	-0.289	FALSE	-0.084	-0.4	FALSE	-0.029	-0.582	FALSE
51225	ABI3	-0.376	0.168	FALSE	-0.29	0.093	FALSE	-0.222	0.039	FALSE	-0.145	-0.086	FALSE	-0.031	-0.538	FALSE
25	ABL1	-0.365	-0.007	FALSE	-0.308	-0.083	FALSE	-0.261	-0.07	FALSE	-0.221	-0.044	FALSE	-0.166	-0.105	FALSE
27	ABL2	-0.308	0.297	FALSE	-0.262	0.25	FALSE	-0.21	0.2	FALSE	-0.155	0.293	FALSE	-0.064	0.424	FALSE
3983	ABLIM1	-0.316	0.047	FALSE	-0.237	0.065	FALSE	-0.19	0.037	FALSE	-0.139	0.012	FALSE	-0.064	-0.155	FALSE
84448	ABLIM2	-0.322	0.014	FALSE	-0.25	0.058	FALSE	-0.198	-0.073	FALSE	-0.141	-0.163	FALSE	-0.052	-0.478	FALSE
22885	ABLIM3	-0.415	0.163	FALSE	-0.369	0.195	FALSE	-0.311	0.189	FALSE	-0.26	0.199	FALSE	-0.162	0.216	FALSE
29	ABR	-0.409	0.201	FALSE	-0.307	0.243	FALSE	-0.247	0.318	FALSE	-0.173	0.336	FALSE	-0.078	0.412	FALSE
137735	ABRA	-0.244	0.126	FALSE	-0.194	-0.006	FALSE	-0.168	-0.045	FALSE	-0.132	-0.029	FALSE	-0.066	-0.108	FALSE
84142	ABRAXAS1	-0.309	-0.035	FALSE	-0.281	0.004	FALSE	-0.235	0.008	FALSE	-0.186	0	FALSE	-0.105	-0.114	FALSE
23172	ABRAXAS2	-0.349	-0.133	FALSE	-0.291	-0.128	FALSE	-0.256	-0.097	FALSE	-0.199	-0.041	FALSE	-0.103	0.107	FALSE
29777	ABT1	-0.488	-0.036	TRUE	-0.427	-0.04	TRUE	-0.38	-0.089	TRUE	-0.331	-0.074	TRUE	-0.244	-0.086	TRUE
80325	ABTB1	-0.348	-0.094	FALSE	-0.252	-0.151	FALSE	-0.218	-0.121	FALSE	-0.179	-0.163	FALSE	-0.112	-0.192	FALSE
25841	ABTB2	-0.212	-0.068	FALSE	-0.156	-0.061	FALSE	-0.12	-0.096	FALSE	-0.073	-0.114	FALSE	-0.02	-0.133	FALSE
30	ACAA1	-0.203	-0.034	FALSE	-0.18	0.003	FALSE	-0.152	0.035	FALSE	-0.11	0.07	FALSE	-0.037	0.093	FALSE
10449	ACAA2	-0.197	0.118	FALSE	-0.147	0.121	FALSE	-0.106	0.195	FALSE	-0.056	0.239	FALSE	-0.024	0.494	FALSE
31	ACACA	-0.655	0.189	TRUE	-0.497	0.227	TRUE	-0.391	0.172	TRUE	-0.353	0.212	TRUE	-0.22	0.186	TRUE
32	ACACB	-0.505	0.105	TRUE	-0.374	0.089	TRUE	-0.323	0.098	TRUE	-0.251	0.092	TRUE	-0.167	0.191	TRUE
80724	ACAD10	-0.449	0.105	TRUE	-0.401	0.129	TRUE	-0.352	0.151	TRUE	-0.277	0.165	TRUE	-0.204	0.35	TRUE
84129	ACAD11	-0.431	0.162	TRUE	-0.348	0.208	TRUE	-0.254	0.176	TRUE	-0.211	0.24	TRUE	-0.117	0.284	TRUE
27034	ACAD8	-0.214	0	FALSE	-0.139	-0.055	FALSE	-0.095	-0.047	FALSE	-0.053	-0.026	FALSE	0	0.056	FALSE
28976	ACAD9	-0.511	-0.089	TRUE	-0.455	-0.044	TRUE	-0.407	-0.035	TRUE	-0.346	-0.035	TRUE	-0.25	0.008	TRUE
33	ACADL	-0.411	0.184	FALSE	-0.359	0.214	FALSE	-0.272	0.196	FALSE	-0.19	0.164	FALSE	-0.104	0.241	FALSE
34	ACADM	-0.382	0.117	FALSE	-0.324	0.127	FALSE	-0.272	0.172	FALSE	-0.225	0.281	FALSE	-0.124	0.414	FALSE
35	ACADS	-0.485	-0.027	TRUE	-0.418	-0.028	TRUE	-0.372	0.013	TRUE	-0.316	0.021	TRUE	-0.214	0.079	TRUE
36	ACADSB	-0.408	0.048	FALSE	-0.348	0.043	FALSE	-0.279	0.032	FALSE	-0.202	-0.014	FALSE	-0.133	0.078	FALSE
37	ACADVL	-0.387	-0.012	FALSE	-0.308	-0.015	FALSE	-0.247	-0.034	FALSE	-0.172	-0.034	FALSE	-0.105	0.03	FALSE
176	ACAN	-0.285	0.179	FALSE	-0.228	0.183	FALSE	-0.157	0.086	FALSE	-0.089	-0.036	FALSE	-0.039	-0.063	FALSE
9744	ACAP1	-0.411	-0.145	FALSE	-0.37	-0.16	FALSE	-0.302	-0.192	FALSE	-0.249	-0.171	FALSE	-0.181	-0.164	FALSE
23527	ACAP2	-0.222	-0.039	FALSE	-0.163	-0.103	FALSE	-0.139	-0.056	FALSE	-0.094	-0.138	FALSE	-0.024	-0.228	FALSE
116983	ACAP3	-0.363	-0.05	FALSE	-0.309	0.014	FALSE	-0.262	0.049	FALSE	-0.207	0.062	FALSE	-0.111	-0.001	FALSE
38	ACAT1	-0.355	0.162	FALSE	-0.303	0.203	FALSE	-0.248	0.297	FALSE	-0.176	0.24	FALSE	-0.081	0.49	FALSE
39	ACAT2	-0.412	0.084	FALSE	-0.358	0.147	FALSE	-0.274	0.117	FALSE	-0.22	0.13	FALSE	-0.122	0.165	FALSE
64746	ACBD3	-0.347	0.19	FALSE	-0.279	0.234	FALSE	-0.222	0.249	FALSE	-0.16	0.234	FALSE	-0.074	0.204	FALSE
79777	ACBD4	-0.184	-0.049	FALSE	-0.121	-0.207	FALSE	-0.098	-0.171	FALSE	-0.075	-0.173	FALSE	-0.042	-0.307	FALSE
91452	ACBD5	-0.398	0.12	FALSE	-0.242	-0.011	FALSE	-0.19	0.03	FALSE	-0.132	0.032	FALSE	-0.074	0.202	FALSE
84320	ACBD6	-0.243	0.057	FALSE	-0.141	0.036	FALSE	-0.068	-0.025	FALSE	-0.042	-0.051	FALSE	-0.012	-0.216	FALSE
84680	ACCS	-0.413	0.098	FALSE	-0.342	0.019	FALSE	-0.299	0.03	FALSE	-0.219	-0.011	FALSE	-0.156	0.113	FALSE
390110	ACCSL	-0.304	-0.173	FALSE	-0.265	-0.128	FALSE	-0.23	-0.148	FALSE	-0.162	-0.205	FALSE	-0.097	-0.264	FALSE
65057	ACD	-0.39	0.09	FALSE	-0.351	0.103	FALSE	-0.31	0.161	FALSE	-0.259	0.151	FALSE	-0.199	0.211	FALSE
1636	ACE	-0.207	-0.094	FALSE	-0.154	-0.106	FALSE	-0.118	-0.091	FALSE	-0.098	-0.014	FALSE	-0.06	0.153	FALSE
59272	ACE2	-0.265	0.084	FALSE	-0.17	0.115	FALSE	-0.141	0.122	FALSE	-0.091	0.112	FALSE	-0.016	0.046	FALSE
125981	ACER1	-0.214	-0.078	FALSE	-0.159	-0.09	FALSE	-0.13	-0.097	FALSE	-0.084	-0.063	FALSE	-0.019	-0.075	FALSE
340485	ACER2	-0.291	0.161	FALSE	-0.269	0.247	FALSE	-0.239	0.291	FALSE	-0.195	0.273	FALSE	-0.109	0.016	FALSE
55331	ACER3	-0.379	0.085	FALSE	-0.333	0.076	FALSE	-0.273	0.067	FALSE	-0.217	0.002	FALSE	-0.129	0.084	FALSE
43	ACHE	-0.397	0.041	FALSE	-0.326	0.037	FALSE	-0.273	0.028	FALSE	-0.23	0.017	FALSE	-0.147	-0.008	FALSE
22985	ACIN1	-0.721	-0.031	TRUE	-0.646	-0.048	TRUE	-0.566	-0.047	TRUE	-0.506	0.022	TRUE	-0.399	0.036	TRUE
2532	ACKR1	-0.382	0.083	FALSE	-0.331	0.082	FALSE	-0.278	0.032	FALSE	-0.202	0.038	FALSE	-0.097	0.002	FALSE
1238	ACKR2	-0.358	0.078	FALSE	-0.271	0.065	FALSE	-0.207	0.016	FALSE	-0.16	0.09	FALSE	-0.07	0.087	FALSE
57007	ACKR3	-0.424	-0.019	FALSE	-0.323	-0.047	FALSE	-0.292	-0.008	FALSE	-0.242	0.004	FALSE	-0.161	0.033	FALSE
51554	ACKR4	-0.437	-0.01	TRUE	-0.37	-0.053	TRUE	-0.301	-0.07	TRUE	-0.25	-0.075	TRUE	-0.173	-0.065	TRUE
47	ACLY	-0.975	0.165	TRUE	-0.864	0.17	TRUE	-0.8	0.267	TRUE	-0.711	0.318	TRUE	-0.533	0.467	TRUE
130013	ACMSD	-0.328	0.146	FALSE	-0.275	0.23	FALSE	-0.216	0.273	FALSE	-0.154	0.236	FALSE	-0.054	0.208	FALSE
48	ACO1	-0.324	-0.046	FALSE	-0.28	0.042	FALSE	-0.235	0.113	FALSE	-0.172	0.151	FALSE	-0.076	0.223	FALSE
50	ACO2	-1.175	0.209	TRUE	-1.092	0.266	TRUE	-0.995	0.316	TRUE	-0.838	0.392	TRUE	-0.609	0.607	TRUE
641371	ACOT1	-0.317	-0.001	FALSE	-0.281	0.094	FALSE	-0.219	0.152	FALSE	-0.162	0.167	FALSE	-0.085	0.381	FALSE
26027	ACOT11	-0.517	-0.051	TRUE	-0.459	0.006	TRUE	-0.41	0.03	TRUE	-0.354	0.031	TRUE	-0.243	-0.001	TRUE
134526	ACOT12	-0.389	0.029	FALSE	-0.331	-0.06	FALSE	-0.27	-0.116	FALSE	-0.234	-0.08	FALSE	-0.153	-0.113	FALSE
55856	ACOT13	-0.356	0.071	FALSE	-0.27	0.057	FALSE	-0.216	0.114	FALSE	-0.162	0.083	FALSE	-0.08	-0.003	FALSE
10965	ACOT2	-0.167	0.101	FALSE	-0.11	0.136	FALSE	-0.076	0.268	FALSE	-0.024	0.379	FALSE	0.051	0.563	FALSE
122970	ACOT4	-0.217	0.135	FALSE	-0.183	-0.004	FALSE	-0.159	0.043	FALSE	-0.107	0.073	FALSE	-0.058	0.223	FALSE
11332	ACOT7	-0.262	0.175	FALSE	-0.225	0.16	FALSE	-0.173	0.153	FALSE	-0.12	0.143	FALSE	-0.053	0.125	FALSE
10005	ACOT8	-0.641	0.258	TRUE	-0.589	0.203	TRUE	-0.532	0.139	TRUE	-0.498	0.245	TRUE	-0.363	0.652	TRUE
23597	ACOT9	-0.296	-0.007	FALSE	-0.208	-0.081	FALSE	-0.151	-0.097	FALSE	-0.115	-0.026	FALSE	-0.053	0.086	FALSE
51	ACOX1	-0.41	0.048	FALSE	-0.35	0.038	FALSE	-0.29	0.044	FALSE	-0.234	0.029	FALSE	-0.143	0.017	FALSE
8309	ACOX2	-0.251	-0.025	FALSE	-0.182	-0.023	FALSE	-0.147	0.002	FALSE	-0.098	0.014	FALSE	-0.024	-0.041	FALSE
8310	ACOX3	-0.464	0.005	TRUE	-0.366	-0.038	TRUE	-0.313	-0.02	TRUE	-0.263	0.032	TRUE	-0.175	0.046	TRUE
55289	ACOXL	-0.374	-0.134	FALSE	-0.32	-0.166	FALSE	-0.288	-0.155	FALSE	-0.232	-0.206	FALSE	-0.161	-0.147	FALSE
52	ACP1	-0.244	0.078	FALSE	-0.183	0.097	FALSE	-0.136	0.094	FALSE	-0.08	0.13	FALSE	-0.015	0.1	FALSE
53	ACP2	-0.285	-0.119	FALSE	-0.244	-0.093	FALSE	-0.179	-0.1	FALSE	-0.147	-0.148	FALSE	-0.075	-0.165	FALSE
54	ACP5	-0.408	-0.008	FALSE	-0.343	-0.014	FALSE	-0.267	0.027	FALSE	-0.201	0.002	FALSE	-0.127	-0.039	FALSE
51205	ACP6	-0.378	0.157	FALSE	-0.293	0.106	FALSE	-0.239	0.158	FALSE	-0.202	0.198	FALSE	-0.114	0.055	FALSE
390928	ACP7	-0.628	0.217	TRUE	-0.479	0.158	TRUE	-0.399	0.133	TRUE	-0.295	0.092	TRUE	-0.189	-0.071	TRUE
55	ACPP	-0.549	0.391	TRUE	-0.41	0.377	TRUE	-0.297	0.362	TRUE	-0.204	0.323	TRUE	-0.099	0.28	TRUE
49	ACR	-0.593	0.266	TRUE	-0.52	0.12	TRUE	-0.469	0.16	TRUE	-0.399	0.18	TRUE	-0.284	0.39	TRUE
84519	ACRBP	-0.249	-0.032	FALSE	-0.189	0.004	FALSE	-0.158	0.064	FALSE	-0.079	-0.009	FALSE	-0.037	0.118	FALSE
56	ACRV1	-0.417	0.092	FALSE	-0.342	0.165	FALSE	-0.288	0.168	FALSE	-0.203	0.036	FALSE	-0.052	-0.09	FALSE
23205	ACSBG1	-0.121	-0.106	FALSE	-0.071	-0.075	FALSE	-0.05	-0.135	FALSE	-0.035	-0.132	FALSE	-0.018	-0.106	FALSE
81616	ACSBG2	-0.195	-0.214	FALSE	-0.147	-0.253	FALSE	-0.113	-0.236	FALSE	-0.08	-0.29	FALSE	-0.051	-0.436	FALSE
80221	ACSF2	-0.377	-0.28	FALSE	-0.297	-0.321	FALSE	-0.268	-0.295	FALSE	-0.229	-0.287	FALSE	-0.134	-0.349	FALSE
197322	ACSF3	-0.134	0.213	FALSE	-0.086	0.22	FALSE	-0.063	0.333	FALSE	-0.047	0.469	FALSE	-0.027	0.779	FALSE
2180	ACSL1	-0.225	-0.14	FALSE	-0.2	-0.039	FALSE	-0.17	-0.023	FALSE	-0.11	-0.031	FALSE	-0.045	-0.061	FALSE
2181	ACSL3	-0.715	0.137	TRUE	-0.598	0.124	TRUE	-0.504	0.14	TRUE	-0.406	0.122	TRUE	-0.284	0.217	TRUE
2182	ACSL4	-0.605	0.247	TRUE	-0.45	0.18	TRUE	-0.382	0.203	TRUE	-0.3	0.204	TRUE	-0.202	0.251	TRUE
51703	ACSL5	-0.238	0.3	FALSE	-0.164	0.313	FALSE	-0.107	0.353	FALSE	-0.049	0.405	FALSE	0	0.652	FALSE
23305	ACSL6	-0.361	0.12	FALSE	-0.292	0.147	FALSE	-0.235	0.123	FALSE	-0.159	0.159	FALSE	-0.074	0.207	FALSE
116285	ACSM1	-0.234	0.113	FALSE	-0.177	0.126	FALSE	-0.105	0.187	FALSE	-0.037	0.205	FALSE	0.009	0.398	FALSE
348158	ACSM2B	-0.127	0.1	FALSE	-0.092	0.154	FALSE	-0.045	0.167	FALSE	-0.012	0.191	FALSE	0.039	0.276	FALSE
6296	ACSM3	-0.282	-0.022	FALSE	-0.235	0.042	FALSE	-0.185	-0.025	FALSE	-0.137	-0.036	FALSE	-0.065	-0.057	FALSE
54988	ACSM5	-0.293	0.113	FALSE	-0.192	0.004	FALSE	-0.119	-0.049	FALSE	-0.075	-0.037	FALSE	-0.017	-0.389	FALSE
142827	ACSM6	-0.439	0.146	TRUE	-0.277	0.124	TRUE	-0.181	0.046	TRUE	-0.092	-0.047	TRUE	-0.051	-0.273	TRUE
84532	ACSS1	-0.559	0.014	TRUE	-0.538	0.044	TRUE	-0.498	0.088	TRUE	-0.431	0.216	TRUE	-0.317	0.657	TRUE
55902	ACSS2	-0.119	0.109	FALSE	-0.041	0.105	FALSE	-0.007	0.165	FALSE	0.011	0.252	FALSE	0.049	0.438	FALSE
79611	ACSS3	-0.257	-0.05	FALSE	-0.173	-0.155	FALSE	-0.136	-0.23	FALSE	-0.088	-0.344	FALSE	-0.037	-0.521	FALSE
58	ACTA1	-0.299	-0.018	FALSE	-0.243	-0.06	FALSE	-0.198	-0.167	FALSE	-0.166	-0.154	FALSE	-0.109	-0.188	FALSE
59	ACTA2	-0.321	-0.205	FALSE	-0.266	-0.203	FALSE	-0.211	-0.225	FALSE	-0.169	-0.234	FALSE	-0.102	-0.198	FALSE
60	ACTB	-1.06	0.131	TRUE	-1.021	0.16	TRUE	-0.962	0.236	TRUE	-0.82	0.212	TRUE	-0.631	0.18	TRUE
345651	ACTBL2	-0.546	-0.073	TRUE	-0.487	-0.04	TRUE	-0.432	0.02	TRUE	-0.373	0.127	TRUE	-0.233	0.395	TRUE
70	ACTC1	-0.413	-0.104	FALSE	-0.359	-0.109	FALSE	-0.33	-0.129	FALSE	-0.302	-0.068	FALSE	-0.223	-0.064	FALSE
71	ACTG1	-0.933	0.057	TRUE	-0.831	0.053	TRUE	-0.763	0.057	TRUE	-0.699	0.076	TRUE	-0.582	0.118	TRUE
72	ACTG2	-1.003	0.047	TRUE	-0.903	0.095	TRUE	-0.828	0.101	TRUE	-0.728	0.052	TRUE	-0.595	0.088	TRUE
86	ACTL6A	-1.436	-0.02	TRUE	-1.381	0.019	TRUE	-1.295	0.029	TRUE	-1.218	0.053	TRUE	-1.04	0.01	TRUE
51412	ACTL6B	-0.369	0.033	FALSE	-0.297	-0.014	FALSE	-0.235	-0.062	FALSE	-0.169	-0.133	FALSE	-0.102	-0.208	FALSE
10881	ACTL7A	-0.647	0.07	TRUE	-0.541	0.057	TRUE	-0.477	0.068	TRUE	-0.412	0.068	TRUE	-0.303	0.184	TRUE
10880	ACTL7B	-0.234	-0.034	FALSE	-0.204	0.029	FALSE	-0.137	-0.006	FALSE	-0.083	-0.028	FALSE	-0.039	-0.044	FALSE
81569	ACTL8	-0.244	0.106	FALSE	-0.174	0.161	FALSE	-0.136	0.183	FALSE	-0.076	0.23	FALSE	-0.035	0.475	FALSE
284382	ACTL9	-0.319	0.038	FALSE	-0.227	0.002	FALSE	-0.172	-0.034	FALSE	-0.11	-0.117	FALSE	-0.059	-0.466	FALSE
87	ACTN1	-0.454	-0.036	TRUE	-0.398	-0.056	TRUE	-0.355	-0.072	TRUE	-0.295	-0.115	TRUE	-0.218	-0.04	TRUE
88	ACTN2	-0.296	0.043	FALSE	-0.216	0.008	FALSE	-0.178	0.086	FALSE	-0.128	0.101	FALSE	-0.066	0.105	FALSE
81	ACTN4	-0.288	0.432	FALSE	-0.18	0.361	FALSE	-0.133	0.457	FALSE	-0.083	0.563	FALSE	0.001	0.643	FALSE
55860	ACTR10	-1.032	-0.133	TRUE	-0.897	-0.136	TRUE	-0.799	-0.128	TRUE	-0.721	-0.098	TRUE	-0.606	-0.027	TRUE
10121	ACTR1A	-1.323	0.046	TRUE	-1.179	0.045	TRUE	-1.083	0.054	TRUE	-0.958	0.063	TRUE	-0.809	0.068	TRUE
10120	ACTR1B	-0.382	0.172	FALSE	-0.325	0.218	FALSE	-0.29	0.242	FALSE	-0.246	0.343	FALSE	-0.152	0.556	FALSE
10097	ACTR2	-0.953	-0.084	TRUE	-0.856	-0.067	TRUE	-0.789	-0.039	TRUE	-0.706	-0.032	TRUE	-0.595	-0.073	TRUE
10096	ACTR3	-0.784	0.057	TRUE	-0.658	0.081	TRUE	-0.599	0.137	TRUE	-0.514	0.145	TRUE	-0.378	0.215	TRUE
57180	ACTR3B	-0.243	0.004	FALSE	-0.216	0.063	FALSE	-0.141	0.088	FALSE	-0.098	0.111	FALSE	-0.029	0.027	FALSE
79913	ACTR5	-0.524	0.049	TRUE	-0.493	0.069	TRUE	-0.443	0.089	TRUE	-0.372	0.067	TRUE	-0.272	0.102	TRUE
64431	ACTR6	-0.882	-0.124	TRUE	-0.795	-0.077	TRUE	-0.729	-0.048	TRUE	-0.653	-0.049	TRUE	-0.556	0.025	TRUE
93973	ACTR8	-0.921	-0.157	TRUE	-0.877	-0.144	TRUE	-0.809	-0.149	TRUE	-0.745	-0.158	TRUE	-0.628	-0.14	TRUE
139741	ACTRT1	-0.318	0.136	FALSE	-0.155	0.044	FALSE	-0.116	-0.012	FALSE	-0.073	-0.096	FALSE	-0.026	-0.304	FALSE
140625	ACTRT2	-0.302	0.02	FALSE	-0.263	0.035	FALSE	-0.189	0.019	FALSE	-0.127	0.055	FALSE	-0.047	-0.08	FALSE
84517	ACTRT3	-0.228	0.135	FALSE	-0.136	0.108	FALSE	-0.081	0.145	FALSE	-0.034	0.167	FALSE	0.036	0.233	FALSE
90	ACVR1	-0.331	-0.066	FALSE	-0.262	-0.123	FALSE	-0.229	-0.127	FALSE	-0.164	-0.134	FALSE	-0.102	-0.107	FALSE
91	ACVR1B	-0.373	0.069	FALSE	-0.272	0.063	FALSE	-0.239	0.059	FALSE	-0.189	0.078	FALSE	-0.11	0.084	FALSE
130399	ACVR1C	-0.252	0.016	FALSE	-0.189	-0.051	FALSE	-0.144	-0.082	FALSE	-0.103	-0.042	FALSE	-0.033	-0.012	FALSE
92	ACVR2A	-0.404	0.117	FALSE	-0.334	0.121	FALSE	-0.303	0.159	FALSE	-0.258	0.247	FALSE	-0.185	0.325	FALSE
93	ACVR2B	-0.356	-0.006	FALSE	-0.275	-0.002	FALSE	-0.237	0.019	FALSE	-0.184	0.018	FALSE	-0.105	0.032	FALSE
94	ACVRL1	-0.351	-0.024	FALSE	-0.308	-0.08	FALSE	-0.264	-0.092	FALSE	-0.222	-0.052	FALSE	-0.144	-0.023	FALSE
95	ACY1	-0.502	0.183	TRUE	-0.437	0.19	TRUE	-0.386	0.229	TRUE	-0.289	0.278	TRUE	-0.169	0.259	TRUE
91703	ACY3	-0.242	0.386	FALSE	-0.15	0.392	FALSE	-0.089	0.452	FALSE	-0.045	0.53	FALSE	-0.005	0.837	FALSE
97	ACYP1	-0.32	-0.081	FALSE	-0.269	-0.066	FALSE	-0.202	-0.094	FALSE	-0.132	-0.088	FALSE	-0.065	-0.177	FALSE
98	ACYP2	-0.333	-0.016	FALSE	-0.235	-0.038	FALSE	-0.217	-0.011	FALSE	-0.17	-0.021	FALSE	-0.097	0.023	FALSE
100	ADA	-0.318	0.085	FALSE	-0.277	0.161	FALSE	-0.228	0.181	FALSE	-0.173	0.228	FALSE	-0.07	0.207	FALSE
51816	ADA2	-0.338	0.032	FALSE	-0.296	0.028	FALSE	-0.236	0.04	FALSE	-0.153	0.041	FALSE	-0.08	-0.019	FALSE
132612	ADAD1	-0.406	-0.092	FALSE	-0.362	-0.069	FALSE	-0.306	-0.13	FALSE	-0.257	-0.122	FALSE	-0.127	-0.158	FALSE
161931	ADAD2	-0.31	0.108	FALSE	-0.277	0.166	FALSE	-0.234	0.181	FALSE	-0.171	0.159	FALSE	-0.095	0.079	FALSE
161823	ADAL	-0.174	-0.027	FALSE	-0.145	-0.056	FALSE	-0.089	-0.041	FALSE	-0.052	-0.081	FALSE	-0.011	-0.032	FALSE
102	ADAM10	-0.412	0.159	FALSE	-0.387	0.115	FALSE	-0.288	-0.08	FALSE	-0.202	-0.184	FALSE	-0.096	-0.278	FALSE
4185	ADAM11	-0.333	0.005	FALSE	-0.274	0.021	FALSE	-0.218	0.029	FALSE	-0.179	0.051	FALSE	-0.119	0.09	FALSE
8038	ADAM12	-0.331	0.021	FALSE	-0.252	0.02	FALSE	-0.21	0.014	FALSE	-0.151	0.018	FALSE	-0.09	0.069	FALSE
8751	ADAM15	-0.302	-0.071	FALSE	-0.236	-0.026	FALSE	-0.195	0.037	FALSE	-0.128	-0.012	FALSE	-0.058	-0.101	FALSE
6868	ADAM17	-0.359	-0.007	FALSE	-0.321	0.037	FALSE	-0.264	0.02	FALSE	-0.205	0.057	FALSE	-0.124	0.088	FALSE
8749	ADAM18	-0.177	-0.049	FALSE	-0.166	0.017	FALSE	-0.14	0.03	FALSE	-0.098	0.096	FALSE	-0.019	0.068	FALSE
8728	ADAM19	-0.421	0.199	FALSE	-0.264	0.175	FALSE	-0.207	0.173	FALSE	-0.143	0.204	FALSE	-0.056	0.114	FALSE
2515	ADAM2	-0.456	0.091	TRUE	-0.398	0.127	TRUE	-0.339	0.061	TRUE	-0.277	0.065	TRUE	-0.171	0.12	TRUE
8748	ADAM20	-0.291	0.103	FALSE	-0.225	0.123	FALSE	-0.171	0.144	FALSE	-0.09	0.083	FALSE	-0.025	0.029	FALSE
8747	ADAM21	-0.276	-0.21	FALSE	-0.233	-0.171	FALSE	-0.178	-0.239	FALSE	-0.144	-0.213	FALSE	-0.092	-0.185	FALSE
53616	ADAM22	-0.176	-0.1	FALSE	-0.139	-0.048	FALSE	-0.091	-0.067	FALSE	-0.065	-0.101	FALSE	-0.027	-0.116	FALSE
8745	ADAM23	-0.48	0.066	TRUE	-0.377	0.021	TRUE	-0.297	0.03	TRUE	-0.221	0.031	TRUE	-0.145	0.007	TRUE
10863	ADAM28	-0.233	-0.106	FALSE	-0.148	-0.167	FALSE	-0.105	-0.135	FALSE	-0.072	-0.121	FALSE	-0.018	-0.177	FALSE
11086	ADAM29	-0.244	0.065	FALSE	-0.211	0.127	FALSE	-0.117	0.119	FALSE	-0.076	0.151	FALSE	-0.004	0.103	FALSE
11085	ADAM30	-0.432	-0.127	TRUE	-0.358	-0.106	TRUE	-0.301	-0.1	TRUE	-0.259	-0.098	TRUE	-0.207	-0.016	TRUE
203102	ADAM32	-0.255	-0.132	FALSE	-0.208	-0.102	FALSE	-0.158	-0.084	FALSE	-0.116	-0.013	FALSE	-0.051	-0.185	FALSE
80332	ADAM33	-0.143	-0.146	FALSE	-0.113	-0.088	FALSE	-0.088	-0.083	FALSE	-0.07	-0.029	FALSE	-0.029	0.141	FALSE
8756	ADAM7	-0.303	0.046	FALSE	-0.257	0	FALSE	-0.212	0.006	FALSE	-0.177	0.068	FALSE	-0.094	-0.032	FALSE
101	ADAM8	-0.288	0.067	FALSE	-0.268	0.152	FALSE	-0.226	0.158	FALSE	-0.167	0.163	FALSE	-0.068	0.13	FALSE
8754	ADAM9	-0.141	0.076	FALSE	-0.101	0.049	FALSE	-0.078	0.131	FALSE	-0.049	0.195	FALSE	-0.013	0.388	FALSE
27299	ADAMDEC1	-0.602	0.034	TRUE	-0.514	0.081	TRUE	-0.466	0.096	TRUE	-0.381	0.167	TRUE	-0.267	0.511	TRUE
9510	ADAMTS1	-0.426	-0.089	TRUE	-0.345	-0.115	TRUE	-0.301	-0.132	TRUE	-0.238	-0.16	TRUE	-0.16	-0.084	TRUE
81794	ADAMTS10	-0.468	-0.007	TRUE	-0.395	-0.012	TRUE	-0.335	-0.032	TRUE	-0.283	-0.051	TRUE	-0.204	-0.065	TRUE
81792	ADAMTS12	-0.492	-0.046	TRUE	-0.368	-0.111	TRUE	-0.308	-0.106	TRUE	-0.234	-0.119	TRUE	-0.159	0.098	TRUE
11093	ADAMTS13	-0.382	-0.108	FALSE	-0.32	-0.111	FALSE	-0.264	-0.108	FALSE	-0.185	-0.162	FALSE	-0.113	-0.274	FALSE
140766	ADAMTS14	-0.204	0.161	FALSE	-0.133	0.143	FALSE	-0.089	0.246	FALSE	-0.049	0.381	FALSE	0.001	0.565	FALSE
170689	ADAMTS15	-0.374	0.058	FALSE	-0.32	0.047	FALSE	-0.267	0.009	FALSE	-0.2	-0.026	FALSE	-0.12	-0.111	FALSE
170690	ADAMTS16	-0.281	-0.071	FALSE	-0.229	-0.074	FALSE	-0.191	-0.093	FALSE	-0.155	-0.135	FALSE	-0.088	-0.166	FALSE
170691	ADAMTS17	-0.167	0.335	FALSE	-0.097	0.492	FALSE	-0.03	0.535	FALSE	-0.01	0.699	FALSE	0.022	1.278	FALSE
170692	ADAMTS18	-0.288	-0.135	FALSE	-0.241	-0.156	FALSE	-0.179	-0.196	FALSE	-0.134	-0.227	FALSE	-0.072	-0.255	FALSE
171019	ADAMTS19	-0.337	0.072	FALSE	-0.288	0.12	FALSE	-0.256	0.191	FALSE	-0.187	0.156	FALSE	-0.09	0.092	FALSE
9509	ADAMTS2	-0.294	0.109	FALSE	-0.211	0.084	FALSE	-0.148	0.116	FALSE	-0.102	0.132	FALSE	-0.049	0.257	FALSE
80070	ADAMTS20	-0.532	0.242	TRUE	-0.396	0.267	TRUE	-0.339	0.322	TRUE	-0.258	0.253	TRUE	-0.156	0.303	TRUE
9508	ADAMTS3	-0.334	0.02	FALSE	-0.272	0.033	FALSE	-0.217	-0.02	FALSE	-0.171	0	FALSE	-0.081	-0.052	FALSE
9507	ADAMTS4	-0.404	0.36	FALSE	-0.23	0.345	FALSE	-0.163	0.418	FALSE	-0.118	0.426	FALSE	-0.039	0.614	FALSE
11096	ADAMTS5	-0.082	0.087	FALSE	-0.066	0.135	FALSE	-0.038	0.101	FALSE	-0.01	0.152	FALSE	0.021	0.319	FALSE
11174	ADAMTS6	-0.259	-0.1	FALSE	-0.222	-0.059	FALSE	-0.166	-0.069	FALSE	-0.123	-0.043	FALSE	-0.044	-0.089	FALSE
11173	ADAMTS7	-0.286	-0.086	FALSE	-0.232	-0.05	FALSE	-0.204	-0.017	FALSE	-0.157	-0.03	FALSE	-0.098	0.038	FALSE
11095	ADAMTS8	-0.326	0.001	FALSE	-0.251	-0.036	FALSE	-0.181	-0.055	FALSE	-0.095	-0.103	FALSE	-0.038	-0.176	FALSE
56999	ADAMTS9	-0.247	0.04	FALSE	-0.195	0.107	FALSE	-0.143	0.118	FALSE	-0.09	0.124	FALSE	-0.029	0.092	FALSE
92949	ADAMTSL1	-0.212	-0.15	FALSE	-0.168	-0.142	FALSE	-0.142	-0.08	FALSE	-0.092	-0.125	FALSE	-0.045	-0.373	FALSE
9719	ADAMTSL2	-0.171	-0.053	FALSE	-0.107	-0.051	FALSE	-0.079	-0.055	FALSE	-0.058	-0.034	FALSE	-0.027	-0.077	FALSE
57188	ADAMTSL3	-0.257	-0.086	FALSE	-0.207	-0.049	FALSE	-0.166	-0.01	FALSE	-0.106	-0.061	FALSE	-0.028	-0.116	FALSE
54507	ADAMTSL4	-0.282	0.152	FALSE	-0.194	0.084	FALSE	-0.144	0.107	FALSE	-0.106	0.128	FALSE	-0.054	0.205	FALSE
339366	ADAMTSL5	-0.362	-0.074	FALSE	-0.28	-0.106	FALSE	-0.238	-0.112	FALSE	-0.191	-0.157	FALSE	-0.128	-0.189	FALSE
11033	ADAP1	-0.517	-0.069	TRUE	-0.471	0	TRUE	-0.398	-0.06	TRUE	-0.336	-0.029	TRUE	-0.226	0.059	TRUE
55803	ADAP2	-0.337	-0.096	FALSE	-0.288	-0.108	FALSE	-0.236	-0.114	FALSE	-0.181	-0.155	FALSE	-0.12	-0.193	FALSE
103	ADAR	-1.15	0.234	TRUE	-1.022	0.268	TRUE	-0.846	0.27	TRUE	-0.63	0.268	TRUE	-0.435	0.326	TRUE
104	ADARB1	-0.335	-0.196	FALSE	-0.271	-0.171	FALSE	-0.235	-0.139	FALSE	-0.205	-0.094	FALSE	-0.115	-0.112	FALSE
105	ADARB2	-0.223	-0.016	FALSE	-0.181	-0.045	FALSE	-0.143	-0.065	FALSE	-0.073	-0.083	FALSE	-0.014	-0.087	FALSE
23536	ADAT1	-0.184	0.105	FALSE	-0.136	0.059	FALSE	-0.096	0.101	FALSE	-0.044	0.146	FALSE	0.029	0.096	FALSE
134637	ADAT2	-0.533	0.1	TRUE	-0.514	0.141	TRUE	-0.473	0.165	TRUE	-0.408	0.131	TRUE	-0.296	0.211	TRUE
113179	ADAT3	-0.433	0.026	TRUE	-0.394	0.021	TRUE	-0.355	0.047	TRUE	-0.314	0.09	TRUE	-0.228	0.057	TRUE
57143	ADCK1	-0.362	0.193	FALSE	-0.277	0.142	FALSE	-0.222	0.215	FALSE	-0.154	0.265	FALSE	-0.055	0.305	FALSE
90956	ADCK2	-0.342	0.187	FALSE	-0.285	0.148	FALSE	-0.255	0.169	FALSE	-0.182	0.194	FALSE	-0.089	0.197	FALSE
203054	ADCK5	-0.26	0.147	FALSE	-0.218	0.052	FALSE	-0.17	0.048	FALSE	-0.125	0.048	FALSE	-0.058	0.03	FALSE
107	ADCY1	-0.359	-0.007	FALSE	-0.323	-0.016	FALSE	-0.277	-0.018	FALSE	-0.222	-0.021	FALSE	-0.146	-0.007	FALSE
55811	ADCY10	-0.401	0.101	FALSE	-0.345	0.032	FALSE	-0.27	0.061	FALSE	-0.216	0.057	FALSE	-0.131	0.131	FALSE
108	ADCY2	-0.348	-0.171	FALSE	-0.308	-0.158	FALSE	-0.278	-0.134	FALSE	-0.212	-0.151	FALSE	-0.15	-0.216	FALSE
109	ADCY3	-0.362	-0.058	FALSE	-0.316	-0.082	FALSE	-0.275	-0.078	FALSE	-0.224	-0.057	FALSE	-0.153	0.014	FALSE
196883	ADCY4	-0.382	-0.066	FALSE	-0.35	-0.071	FALSE	-0.316	-0.114	FALSE	-0.259	-0.127	FALSE	-0.187	-0.099	FALSE
111	ADCY5	-0.278	0.067	FALSE	-0.214	-0.003	FALSE	-0.166	0.065	FALSE	-0.112	0.002	FALSE	-0.038	0.042	FALSE
112	ADCY6	-0.425	0.269	TRUE	-0.39	0.311	TRUE	-0.316	0.324	TRUE	-0.259	0.372	TRUE	-0.136	0.411	TRUE
113	ADCY7	-0.236	-0.033	FALSE	-0.193	-0.025	FALSE	-0.159	0.019	FALSE	-0.119	0.069	FALSE	-0.056	0.178	FALSE
114	ADCY8	-0.297	0.026	FALSE	-0.205	-0.048	FALSE	-0.151	-0.02	FALSE	-0.117	0.013	FALSE	-0.048	0.056	FALSE
115	ADCY9	-0.363	0.03	FALSE	-0.312	-0.077	FALSE	-0.267	-0.088	FALSE	-0.199	-0.095	FALSE	-0.134	-0.105	FALSE
116	ADCYAP1	-0.245	-0.105	FALSE	-0.217	-0.036	FALSE	-0.191	0	FALSE	-0.152	0.064	FALSE	-0.071	0.031	FALSE
117	ADCYAP1R1	-0.506	-0.2	TRUE	-0.463	-0.162	TRUE	-0.419	-0.1	TRUE	-0.363	-0.021	TRUE	-0.269	0.231	TRUE
118	ADD1	-0.251	0.153	FALSE	-0.211	0.221	FALSE	-0.174	0.175	FALSE	-0.121	0.203	FALSE	-0.036	0.053	FALSE
119	ADD2	-0.326	0.042	FALSE	-0.247	-0.048	FALSE	-0.161	-0.123	FALSE	-0.118	-0.192	FALSE	-0.063	-0.543	FALSE
120	ADD3	-0.322	-0.119	FALSE	-0.261	-0.158	FALSE	-0.231	-0.15	FALSE	-0.169	-0.209	FALSE	-0.08	-0.343	FALSE
84435	ADGRA1	-0.376	-0.048	FALSE	-0.246	-0.098	FALSE	-0.193	-0.123	FALSE	-0.146	-0.127	FALSE	-0.069	-0.223	FALSE
25960	ADGRA2	-0.469	-0.163	TRUE	-0.392	-0.209	TRUE	-0.335	-0.194	TRUE	-0.286	-0.165	TRUE	-0.218	0.029	TRUE
166647	ADGRA3	-0.199	-0.008	FALSE	-0.152	0.042	FALSE	-0.117	0.009	FALSE	-0.093	0.014	FALSE	-0.058	0.036	FALSE
575	ADGRB1	-0.319	-0.005	FALSE	-0.294	0.078	FALSE	-0.224	0.077	FALSE	-0.141	-0.041	FALSE	-0.059	-0.071	FALSE
576	ADGRB2	-0.521	-0.064	TRUE	-0.461	-0.094	TRUE	-0.419	-0.076	TRUE	-0.346	-0.004	TRUE	-0.263	0.264	TRUE
577	ADGRB3	-0.26	0.092	FALSE	-0.209	0.144	FALSE	-0.153	0.172	FALSE	-0.082	0.119	FALSE	-0.021	0.202	FALSE
283383	ADGRD1	-0.619	0.049	TRUE	-0.541	0.021	TRUE	-0.446	0.003	TRUE	-0.393	0.057	TRUE	-0.284	0.31	TRUE
2015	ADGRE1	-0.313	-0.135	FALSE	-0.254	-0.152	FALSE	-0.216	-0.138	FALSE	-0.169	-0.148	FALSE	-0.108	-0.223	FALSE
30817	ADGRE2	-0.314	0.106	FALSE	-0.241	0.116	FALSE	-0.194	0.12	FALSE	-0.132	0.167	FALSE	-0.037	0.221	FALSE
84658	ADGRE3	-0.379	0.117	FALSE	-0.325	0	FALSE	-0.289	-0.013	FALSE	-0.231	-0.041	FALSE	-0.138	0	FALSE
976	ADGRE5	-0.273	-0.099	FALSE	-0.2	-0.117	FALSE	-0.15	-0.12	FALSE	-0.11	-0.094	FALSE	-0.057	-0.065	FALSE
266977	ADGRF1	-0.299	-0.11	FALSE	-0.241	-0.12	FALSE	-0.207	-0.134	FALSE	-0.173	-0.116	FALSE	-0.12	-0.061	FALSE
165082	ADGRF3	-0.376	-0.044	FALSE	-0.294	-0.092	FALSE	-0.262	-0.114	FALSE	-0.208	-0.122	FALSE	-0.127	-0.184	FALSE
221393	ADGRF4	-0.589	-0.054	TRUE	-0.467	-0.091	TRUE	-0.413	-0.054	TRUE	-0.324	-0.033	TRUE	-0.224	0.18	TRUE
221395	ADGRF5	-0.37	-0.053	FALSE	-0.296	-0.09	FALSE	-0.237	-0.118	FALSE	-0.182	-0.161	FALSE	-0.114	-0.144	FALSE
9289	ADGRG1	-0.224	0.239	FALSE	-0.184	0.228	FALSE	-0.136	0.245	FALSE	-0.094	0.301	FALSE	-0.035	0.308	FALSE
10149	ADGRG2	-0.241	-0.051	FALSE	-0.195	-0.019	FALSE	-0.15	-0.069	FALSE	-0.112	-0.032	FALSE	-0.054	-0.033	FALSE
222487	ADGRG3	-0.404	-0.047	FALSE	-0.31	-0.112	FALSE	-0.259	-0.138	FALSE	-0.213	-0.164	FALSE	-0.131	-0.262	FALSE
139378	ADGRG4	-0.966	0.074	TRUE	-0.878	0.19	TRUE	-0.729	0.261	TRUE	-0.618	0.407	TRUE	-0.499	0.33	TRUE
221188	ADGRG5	-0.322	-0.149	FALSE	-0.245	-0.138	FALSE	-0.187	-0.122	FALSE	-0.131	-0.121	FALSE	-0.056	-0.305	FALSE
57211	ADGRG6	-0.272	0.409	FALSE	-0.191	0.497	FALSE	-0.105	0.499	FALSE	-0.02	0.493	FALSE	0.026	0.804	FALSE
84873	ADGRG7	-0.439	-0.039	TRUE	-0.363	-0.046	TRUE	-0.298	-0.057	TRUE	-0.235	-0.083	TRUE	-0.151	-0.08	TRUE
22859	ADGRL1	-0.268	-0.085	FALSE	-0.205	-0.044	FALSE	-0.169	0.025	FALSE	-0.108	-0.001	FALSE	-0.036	-0.07	FALSE
23266	ADGRL2	-0.315	-0.039	FALSE	-0.254	-0.037	FALSE	-0.207	-0.059	FALSE	-0.156	-0.127	FALSE	-0.081	-0.284	FALSE
23284	ADGRL3	-0.314	-0.05	FALSE	-0.288	0.038	FALSE	-0.241	0.052	FALSE	-0.195	0.029	FALSE	-0.095	-0.051	FALSE
64123	ADGRL4	-0.413	-0.118	FALSE	-0.375	-0.093	FALSE	-0.326	-0.046	FALSE	-0.254	-0.023	FALSE	-0.182	0.26	FALSE
84059	ADGRV1	-0.186	-0.11	FALSE	-0.118	-0.082	FALSE	-0.091	-0.105	FALSE	-0.052	-0.125	FALSE	-0.002	-0.068	FALSE
124	ADH1A	-0.283	0.025	FALSE	-0.204	0.066	FALSE	-0.126	0.048	FALSE	-0.084	0.088	FALSE	-0.021	0.153	FALSE
125	ADH1B	-0.476	0.048	TRUE	-0.39	-0.021	TRUE	-0.313	-0.055	TRUE	-0.248	-0.043	TRUE	-0.167	0.002	TRUE
127	ADH4	-0.685	0.181	TRUE	-0.571	0.217	TRUE	-0.53	0.274	TRUE	-0.428	0.331	TRUE	-0.306	0.55	TRUE
128	ADH5	-0.502	0.003	TRUE	-0.369	-0.079	TRUE	-0.328	-0.019	TRUE	-0.277	0.043	TRUE	-0.187	0.086	TRUE
130	ADH6	-0.283	-0.114	FALSE	-0.178	-0.15	FALSE	-0.15	-0.103	FALSE	-0.106	-0.115	FALSE	-0.046	-0.034	FALSE
137872	ADHFE1	-0.248	-0.051	FALSE	-0.21	0.016	FALSE	-0.173	0.07	FALSE	-0.109	0.08	FALSE	-0.033	-0.058	FALSE
55256	ADI1	-0.36	0.057	FALSE	-0.308	0.057	FALSE	-0.276	0.117	FALSE	-0.206	0.104	FALSE	-0.114	-0.046	FALSE
149685	ADIG	-0.214	-0.137	FALSE	-0.149	-0.167	FALSE	-0.103	-0.234	FALSE	-0.075	-0.25	FALSE	-0.033	-0.512	FALSE
9370	ADIPOQ	-0.342	0.008	FALSE	-0.267	0.053	FALSE	-0.213	0.098	FALSE	-0.152	-0.013	FALSE	-0.066	-0.164	FALSE
51094	ADIPOR1	-0.299	-0.029	FALSE	-0.24	-0.029	FALSE	-0.18	-0.059	FALSE	-0.144	-0.03	FALSE	-0.081	-0.033	FALSE
79602	ADIPOR2	-0.242	0.079	FALSE	-0.211	0.149	FALSE	-0.164	0.136	FALSE	-0.101	0.124	FALSE	-0.025	0.16	FALSE
10974	ADIRF	-0.333	-0.012	FALSE	-0.253	-0.034	FALSE	-0.199	-0.064	FALSE	-0.148	-0.046	FALSE	-0.09	-0.124	FALSE
132	ADK	-0.299	-0.053	FALSE	-0.231	-0.087	FALSE	-0.179	-0.114	FALSE	-0.144	-0.097	FALSE	-0.085	-0.016	FALSE
133	ADM	-0.403	0.116	FALSE	-0.35	0.188	FALSE	-0.296	0.208	FALSE	-0.237	0.246	FALSE	-0.132	0.244	FALSE
79924	ADM2	-0.279	0.062	FALSE	-0.241	0.131	FALSE	-0.19	0.173	FALSE	-0.141	0.203	FALSE	-0.057	0.114	FALSE
23394	ADNP	-0.511	-0.002	TRUE	-0.489	0.045	TRUE	-0.428	0.052	TRUE	-0.36	0.047	TRUE	-0.263	0.116	TRUE
22850	ADNP2	-0.345	-0.022	FALSE	-0.256	-0.023	FALSE	-0.201	-0.01	FALSE	-0.139	-0.086	FALSE	-0.065	-0.195	FALSE
134	ADORA1	-0.311	0.129	FALSE	-0.259	-0.006	FALSE	-0.21	0.063	FALSE	-0.147	0.023	FALSE	-0.068	-0.024	FALSE
135	ADORA2A	-0.471	0.081	TRUE	-0.394	0.081	TRUE	-0.308	0.089	TRUE	-0.232	0.055	TRUE	-0.137	-0.043	TRUE
136	ADORA2B	-0.216	-0.168	FALSE	-0.193	-0.162	FALSE	-0.151	-0.189	FALSE	-0.117	-0.203	FALSE	-0.067	-0.182	FALSE
83440	ADPGK	-0.455	0.09	TRUE	-0.374	0.082	TRUE	-0.301	0.063	TRUE	-0.252	0.059	TRUE	-0.163	0.126	TRUE
141	ADPRH	-0.204	-0.048	FALSE	-0.187	-0.077	FALSE	-0.166	-0.046	FALSE	-0.132	-0.011	FALSE	-0.079	-0.023	FALSE
113622	ADPRHL1	-0.25	-0.181	FALSE	-0.204	-0.242	FALSE	-0.17	-0.315	FALSE	-0.145	-0.349	FALSE	-0.094	-0.538	FALSE
54936	ADPRHL2	-0.303	0.301	FALSE	-0.247	0.194	FALSE	-0.213	0.227	FALSE	-0.164	0.269	FALSE	-0.097	0.422	FALSE
56985	ADPRM	-0.358	0.151	FALSE	-0.302	0.187	FALSE	-0.246	0.115	FALSE	-0.189	0.135	FALSE	-0.109	0.234	FALSE
148	ADRA1A	-0.354	0.161	FALSE	-0.272	0.216	FALSE	-0.173	0.202	FALSE	-0.134	0.225	FALSE	-0.045	0.23	FALSE
147	ADRA1B	-0.281	0.056	FALSE	-0.187	0	FALSE	-0.126	-0.035	FALSE	-0.082	0.02	FALSE	-0.007	0.04	FALSE
146	ADRA1D	-0.466	0.161	TRUE	-0.388	0.155	TRUE	-0.313	0.162	TRUE	-0.239	0.134	TRUE	-0.141	0.276	TRUE
150	ADRA2A	-0.324	-0.003	FALSE	-0.236	-0.02	FALSE	-0.176	-0.036	FALSE	-0.129	-0.01	FALSE	-0.06	0.011	FALSE
151	ADRA2B	-0.382	-0.087	FALSE	-0.308	-0.063	FALSE	-0.271	-0.02	FALSE	-0.208	-0.062	FALSE	-0.141	-0.051	FALSE
152	ADRA2C	-0.375	-0.031	FALSE	-0.321	-0.013	FALSE	-0.282	0.049	FALSE	-0.216	0.056	FALSE	-0.119	0.02	FALSE
153	ADRB1	-0.2	-0.082	FALSE	-0.162	0.005	FALSE	-0.122	-0.048	FALSE	-0.077	-0.033	FALSE	-0.004	-0.089	FALSE
154	ADRB2	-0.277	-0.103	FALSE	-0.205	-0.103	FALSE	-0.165	-0.066	FALSE	-0.121	-0.046	FALSE	-0.057	-0.081	FALSE
155	ADRB3	-0.263	0.032	FALSE	-0.217	0.061	FALSE	-0.174	0.028	FALSE	-0.114	-0.023	FALSE	-0.043	-0.041	FALSE
11047	ADRM1	-0.582	-0.05	TRUE	-0.549	0.005	TRUE	-0.496	0.04	TRUE	-0.414	0.069	TRUE	-0.313	0.185	TRUE
158	ADSL	-1.243	0.112	TRUE	-1.118	0.182	TRUE	-0.996	0.222	TRUE	-0.848	0.244	TRUE	-0.642	0.365	TRUE
159	ADSS	-0.594	0.118	TRUE	-0.519	0.177	TRUE	-0.424	0.183	TRUE	-0.346	0.276	TRUE	-0.247	0.435	TRUE
122622	ADSSL1	-0.354	-0.109	FALSE	-0.309	-0.142	FALSE	-0.259	-0.148	FALSE	-0.223	-0.189	FALSE	-0.148	-0.262	FALSE
84830	ADTRP	-0.453	0.342	TRUE	-0.373	0.343	TRUE	-0.282	0.362	TRUE	-0.213	0.382	TRUE	-0.116	0.503	TRUE
165	AEBP1	-0.391	0.101	FALSE	-0.366	0.129	FALSE	-0.314	0.164	FALSE	-0.267	0.236	FALSE	-0.147	0.102	FALSE
121536	AEBP2	-0.389	0.04	FALSE	-0.297	0.009	FALSE	-0.253	-0.004	FALSE	-0.201	-0.016	FALSE	-0.134	-0.075	FALSE
64782	AEN	-0.359	0.094	FALSE	-0.306	0.189	FALSE	-0.23	0.251	FALSE	-0.142	0.207	FALSE	-0.061	0.055	FALSE
166	TLE5	-0.415	0.033	FALSE	-0.36	0.089	FALSE	-0.292	0.06	FALSE	-0.229	0.095	FALSE	-0.149	0.02	FALSE
60312	AFAP1	-0.236	0.043	FALSE	-0.134	-0.034	FALSE	-0.074	-0.107	FALSE	-0.035	-0.234	FALSE	0.004	-0.399	FALSE
4301	AFDN	-0.528	0.039	TRUE	-0.428	0.034	TRUE	-0.359	0.071	TRUE	-0.241	-0.049	TRUE	-0.152	-0.131	TRUE
4299	AFF1	-0.424	0.39	FALSE	-0.332	0.322	FALSE	-0.246	0.371	FALSE	-0.128	0.231	FALSE	-0.029	0.217	FALSE
2334	AFF2	-0.089	-0.021	FALSE	-0.041	0.024	FALSE	-0.022	0.073	FALSE	-0.006	0.149	FALSE	0.01	0.485	FALSE
3899	AFF3	-0.361	0.03	FALSE	-0.271	-0.155	FALSE	-0.233	-0.168	FALSE	-0.194	-0.176	FALSE	-0.128	-0.175	FALSE
27125	AFF4	-0.426	0.098	TRUE	-0.308	0.125	TRUE	-0.249	0.052	TRUE	-0.203	0.138	TRUE	-0.139	0.22	TRUE
246269	AFG1L	-0.242	0.156	FALSE	-0.152	0.149	FALSE	-0.111	0.146	FALSE	-0.063	0.128	FALSE	-0.033	0.047	FALSE
10939	AFG3L2	-1.967	0.126	TRUE	-1.807	0.176	TRUE	-1.605	0.071	TRUE	-1.424	0.027	TRUE	-1.196	-0.231	TRUE
173	AFM	-0.215	0.158	FALSE	-0.187	0.173	FALSE	-0.133	0.211	FALSE	-0.092	0.23	FALSE	-0.021	0.133	FALSE
125061	AFMID	-0.287	-0.052	FALSE	-0.21	-0.057	FALSE	-0.17	-0.039	FALSE	-0.133	-0.029	FALSE	-0.053	-0.156	FALSE
174	AFP	-0.222	0.049	FALSE	-0.166	-0.016	FALSE	-0.123	0.04	FALSE	-0.079	0.09	FALSE	-0.015	0.183	FALSE
54812	AFTPH	-0.167	-0.147	FALSE	-0.107	-0.19	FALSE	-0.087	-0.263	FALSE	-0.063	-0.254	FALSE	-0.032	-0.316	FALSE
175	AGA	-0.535	-0.023	TRUE	-0.469	-0.02	TRUE	-0.405	0.023	TRUE	-0.339	0.093	TRUE	-0.241	0.437	TRUE
116987	AGAP1	-0.298	0.032	FALSE	-0.231	0.005	FALSE	-0.177	-0.016	FALSE	-0.119	-0.011	FALSE	-0.061	-0.02	FALSE
116986	AGAP2	-0.395	-0.039	FALSE	-0.34	-0.047	FALSE	-0.284	-0.052	FALSE	-0.237	-0.051	FALSE	-0.16	-0.057	FALSE
116988	AGAP3	-0.244	0.043	FALSE	-0.205	0.024	FALSE	-0.167	0.053	FALSE	-0.104	0.044	FALSE	-0.04	0.061	FALSE
119016	AGAP4	-0.207	0.128	FALSE	-0.15	0.133	FALSE	-0.093	0.186	FALSE	-0.051	0.258	FALSE	0.024	0.35	FALSE
729092	AGAP5	-0.325	-0.15	FALSE	-0.291	-0.121	FALSE	-0.248	-0.086	FALSE	-0.209	-0.063	FALSE	-0.139	-0.046	FALSE
414189	AGAP6	-0.498	-0.197	TRUE	-0.442	-0.156	TRUE	-0.397	-0.116	TRUE	-0.339	-0.097	TRUE	-0.268	-0.125	TRUE
642517	AGAP9	-0.276	0.035	FALSE	-0.238	0.073	FALSE	-0.204	0.113	FALSE	-0.161	0.155	FALSE	-0.081	0.191	FALSE
79841	AGBL2	-0.363	-0.095	FALSE	-0.314	-0.118	FALSE	-0.27	-0.145	FALSE	-0.231	-0.072	FALSE	-0.129	-0.144	FALSE
340351	AGBL3	-0.332	0.288	FALSE	-0.262	0.353	FALSE	-0.205	0.329	FALSE	-0.154	0.311	FALSE	-0.082	0.227	FALSE
60509	AGBL5	-0.331	-0.049	FALSE	-0.246	-0.069	FALSE	-0.17	-0.116	FALSE	-0.125	-0.114	FALSE	-0.079	-0.15	FALSE
177	AGER	-0.247	-0.055	FALSE	-0.196	-0.081	FALSE	-0.154	-0.101	FALSE	-0.116	-0.116	FALSE	-0.047	-0.265	FALSE
3267	AGFG1	-0.382	-0.024	FALSE	-0.323	0.012	FALSE	-0.284	0.047	FALSE	-0.225	0.047	FALSE	-0.143	0.064	FALSE
3268	AGFG2	-0.425	-0.008	TRUE	-0.349	-0.068	TRUE	-0.29	-0.101	TRUE	-0.209	-0.123	TRUE	-0.131	-0.32	TRUE
55109	AGGF1	-0.227	-0.139	FALSE	-0.201	-0.167	FALSE	-0.148	-0.179	FALSE	-0.081	-0.248	FALSE	-0.026	-0.417	FALSE
55750	AGK	-0.354	-0.065	FALSE	-0.244	-0.079	FALSE	-0.21	-0.039	FALSE	-0.136	-0.118	FALSE	-0.025	-0.476	FALSE
178	AGL	-0.53	-0.088	TRUE	-0.466	-0.09	TRUE	-0.401	-0.141	TRUE	-0.35	-0.071	TRUE	-0.25	0.082	TRUE
79814	AGMAT	-0.363	-0.172	FALSE	-0.317	-0.143	FALSE	-0.277	-0.103	FALSE	-0.206	-0.172	FALSE	-0.133	-0.233	FALSE
392636	AGMO	-0.351	-0.162	FALSE	-0.288	-0.157	FALSE	-0.25	-0.245	FALSE	-0.196	-0.251	FALSE	-0.107	-0.214	FALSE
26523	AGO1	-0.379	0.035	FALSE	-0.319	-0.012	FALSE	-0.286	0.076	FALSE	-0.23	0.117	FALSE	-0.145	0.051	FALSE
27161	AGO2	-0.573	0.238	TRUE	-0.412	0.196	TRUE	-0.356	0.241	TRUE	-0.272	0.236	TRUE	-0.142	0.115	TRUE
192669	AGO3	-0.351	0.136	FALSE	-0.292	0.13	FALSE	-0.245	0.124	FALSE	-0.203	0.189	FALSE	-0.127	0.422	FALSE
192670	AGO4	-0.196	-0.177	FALSE	-0.176	-0.111	FALSE	-0.141	-0.1	FALSE	-0.113	-0.094	FALSE	-0.058	-0.155	FALSE
10554	AGPAT1	-0.57	0.222	TRUE	-0.332	0.123	TRUE	-0.277	0.151	TRUE	-0.164	0.101	TRUE	-0.074	0.032	TRUE
10555	AGPAT2	-0.341	-0.057	FALSE	-0.269	-0.081	FALSE	-0.249	-0.072	FALSE	-0.211	-0.047	FALSE	-0.137	-0.091	FALSE
56894	AGPAT3	-0.531	0.133	TRUE	-0.458	0.114	TRUE	-0.359	0.103	TRUE	-0.305	0.155	TRUE	-0.206	0.236	TRUE
56895	AGPAT4	-0.343	0.334	FALSE	-0.213	0.387	FALSE	-0.18	0.442	FALSE	-0.116	0.546	FALSE	-0.029	0.753	FALSE
55326	AGPAT5	-0.382	0.126	FALSE	-0.302	0.102	FALSE	-0.251	0.169	FALSE	-0.21	0.235	FALSE	-0.11	0.3	FALSE
8540	AGPS	-0.398	0.284	FALSE	-0.306	0.186	FALSE	-0.255	0.23	FALSE	-0.185	0.22	FALSE	-0.089	0.079	FALSE
10551	AGR2	-0.362	-0.279	FALSE	-0.338	-0.23	FALSE	-0.305	-0.2	FALSE	-0.243	-0.189	FALSE	-0.168	-0.09	FALSE
155465	AGR3	-0.244	0.017	FALSE	-0.159	-0.076	FALSE	-0.105	-0.176	FALSE	-0.057	-0.251	FALSE	-0.008	-0.522	FALSE
375790	AGRN	-0.363	0.132	FALSE	-0.3	0.13	FALSE	-0.232	0.14	FALSE	-0.18	0.188	FALSE	-0.101	0.267	FALSE
181	AGRP	-0.3	-0.039	FALSE	-0.255	0.011	FALSE	-0.18	-0.029	FALSE	-0.136	0.019	FALSE	-0.057	-0.184	FALSE
183	AGT	-0.47	0.305	TRUE	-0.367	0.335	TRUE	-0.294	0.358	TRUE	-0.24	0.44	TRUE	-0.114	0.62	TRUE
23287	AGTPBP1	-0.146	0.324	FALSE	-0.069	0.4	FALSE	-0.014	0.271	FALSE	0.015	0.377	FALSE	0.054	0.787	FALSE
185	AGTR1	-0.248	-0.204	FALSE	-0.207	-0.165	FALSE	-0.185	-0.179	FALSE	-0.167	-0.117	FALSE	-0.102	-0.1	FALSE
186	AGTR2	-0.286	-0.017	FALSE	-0.223	-0.018	FALSE	-0.189	0.012	FALSE	-0.123	-0.019	FALSE	-0.051	-0.097	FALSE
57085	AGTRAP	-0.174	0	FALSE	-0.124	0.055	FALSE	-0.077	0.043	FALSE	-0.044	0.078	FALSE	-0.007	0.285	FALSE
189	AGXT	-0.384	0.059	FALSE	-0.344	0.081	FALSE	-0.295	0.133	FALSE	-0.213	0.104	FALSE	-0.113	0.068	FALSE
64902	AGXT2	-0.333	-0.132	FALSE	-0.257	-0.127	FALSE	-0.206	-0.151	FALSE	-0.17	-0.13	FALSE	-0.098	-0.154	FALSE
25909	AHCTF1	-1.414	0.023	TRUE	-1.262	-0.007	TRUE	-1.174	-0.008	TRUE	-1.061	-0.059	TRUE	-0.942	-0.067	TRUE
191	AHCY	-0.879	0.037	TRUE	-0.712	0.027	TRUE	-0.658	0.041	TRUE	-0.586	0.092	TRUE	-0.43	0.024	TRUE
10768	AHCYL1	-0.858	0.251	TRUE	-0.768	0.3	TRUE	-0.637	0.33	TRUE	-0.533	0.386	TRUE	-0.337	0.497	TRUE
23382	AHCYL2	-0.37	0.006	FALSE	-0.309	-0.044	FALSE	-0.253	-0.082	FALSE	-0.203	-0.111	FALSE	-0.13	-0.104	FALSE
54806	AHI1	-0.37	0.193	FALSE	-0.332	0.308	FALSE	-0.267	0.29	FALSE	-0.187	0.307	FALSE	-0.087	0.232	FALSE
79026	AHNAK	-0.43	-0.161	TRUE	-0.345	-0.193	TRUE	-0.304	-0.195	TRUE	-0.24	-0.245	TRUE	-0.165	-0.211	TRUE
196	AHR	-0.509	0.05	TRUE	-0.425	0.111	TRUE	-0.368	0.116	TRUE	-0.321	0.175	TRUE	-0.203	0.177	TRUE
57491	AHRR	-0.438	-0.165	TRUE	-0.377	-0.146	TRUE	-0.297	-0.199	TRUE	-0.253	-0.206	TRUE	-0.182	-0.255	TRUE
10598	AHSA1	-0.371	-0.005	FALSE	-0.275	-0.041	FALSE	-0.224	-0.05	FALSE	-0.151	-0.128	FALSE	-0.079	-0.415	FALSE
197	AHSG	-0.241	0.169	FALSE	-0.186	0.208	FALSE	-0.109	0.217	FALSE	-0.055	0.257	FALSE	-0.012	0.341	FALSE
51327	AHSP	-0.341	0.017	FALSE	-0.281	0.012	FALSE	-0.214	0.006	FALSE	-0.126	-0.166	FALSE	-0.059	-0.504	FALSE
57379	AICDA	-0.202	-0.097	FALSE	-0.15	-0.131	FALSE	-0.116	-0.119	FALSE	-0.074	-0.136	FALSE	-0.028	-0.138	FALSE
64853	AIDA	-0.431	-0.098	TRUE	-0.373	-0.059	TRUE	-0.331	-0.002	TRUE	-0.281	0.119	TRUE	-0.151	0.371	TRUE
199	AIF1	-0.268	0.001	FALSE	-0.199	0.034	FALSE	-0.166	0.096	FALSE	-0.11	0.081	FALSE	-0.065	0.339	FALSE
83543	AIF1L	-0.336	-0.084	FALSE	-0.303	-0.106	FALSE	-0.246	-0.161	FALSE	-0.19	-0.198	FALSE	-0.125	-0.242	FALSE
9131	AIFM1	-1.086	0.097	TRUE	-0.903	0.107	TRUE	-0.798	0.132	TRUE	-0.664	0.147	TRUE	-0.534	0.124	TRUE
84883	AIFM2	-0.378	-0.031	FALSE	-0.328	0.009	FALSE	-0.268	0.029	FALSE	-0.214	0.058	FALSE	-0.122	0.072	FALSE
150209	AIFM3	-0.245	0.001	FALSE	-0.223	-0.06	FALSE	-0.18	-0.065	FALSE	-0.145	0.007	FALSE	-0.079	0.052	FALSE
51390	AIG1	-0.785	0.308	TRUE	-0.637	0.37	TRUE	-0.537	0.426	TRUE	-0.415	0.494	TRUE	-0.229	0.421	TRUE
9447	AIM2	-0.586	0.24	TRUE	-0.465	0.279	TRUE	-0.417	0.273	TRUE	-0.308	0.244	TRUE	-0.166	0.185	TRUE
9255	AIMP1	-0.239	0.067	FALSE	-0.153	0.067	FALSE	-0.118	0.085	FALSE	-0.079	0.037	FALSE	-0.053	-0.093	FALSE
7965	AIMP2	-0.45	-0.044	TRUE	-0.416	0.031	TRUE	-0.362	0.047	TRUE	-0.318	-0.054	TRUE	-0.223	-0.025	TRUE
9049	AIP	-0.346	0.156	FALSE	-0.301	0.159	FALSE	-0.259	0.19	FALSE	-0.206	0.223	FALSE	-0.124	0.312	FALSE
23746	AIPL1	-0.373	-0.08	FALSE	-0.319	-0.085	FALSE	-0.265	-0.118	FALSE	-0.22	-0.083	FALSE	-0.138	-0.098	FALSE
326	AIRE	-0.293	-0.066	FALSE	-0.248	-0.132	FALSE	-0.203	-0.143	FALSE	-0.169	-0.066	FALSE	-0.096	-0.088	FALSE
55966	AJAP1	-0.372	-0.127	FALSE	-0.297	-0.132	FALSE	-0.238	-0.149	FALSE	-0.181	-0.208	FALSE	-0.107	-0.301	FALSE
84962	AJUBA	-0.498	0.172	TRUE	-0.41	0.178	TRUE	-0.327	0.184	TRUE	-0.27	0.147	TRUE	-0.187	0.152	TRUE
203	AK1	-0.321	-0.036	FALSE	-0.281	-0.009	FALSE	-0.226	-0.067	FALSE	-0.187	-0.077	FALSE	-0.121	-0.052	FALSE
204	AK2	-0.163	0.037	FALSE	-0.136	-0.033	FALSE	-0.075	-0.039	FALSE	-0.042	-0.014	FALSE	-0.007	0.087	FALSE
50808	AK3	-0.412	-0.044	FALSE	-0.331	-0.042	FALSE	-0.274	-0.054	FALSE	-0.208	-0.114	FALSE	-0.127	-0.081	FALSE
205	AK4	-0.456	-0.057	TRUE	-0.359	-0.07	TRUE	-0.321	-0.075	TRUE	-0.268	-0.07	TRUE	-0.167	-0.153	TRUE
26289	AK5	-0.218	0.126	FALSE	-0.151	0.158	FALSE	-0.093	0.148	FALSE	-0.051	0.282	FALSE	0.01	0.356	FALSE
122481	AK7	-0.308	-0.144	FALSE	-0.262	-0.126	FALSE	-0.219	-0.146	FALSE	-0.162	-0.219	FALSE	-0.093	-0.277	FALSE
158067	AK8	-0.397	-0.146	FALSE	-0.338	-0.195	FALSE	-0.275	-0.222	FALSE	-0.229	-0.22	FALSE	-0.15	-0.213	FALSE
221264	AK9	-0.256	-0.242	FALSE	-0.167	-0.291	FALSE	-0.139	-0.267	FALSE	-0.104	-0.343	FALSE	-0.04	-0.548	FALSE
8165	AKAP1	-0.462	0.026	TRUE	-0.401	0.056	TRUE	-0.317	0.035	TRUE	-0.256	0.032	TRUE	-0.185	-0.033	TRUE
11216	AKAP10	-0.4	0	FALSE	-0.34	0.072	FALSE	-0.304	0.123	FALSE	-0.251	0.15	FALSE	-0.163	0.13	FALSE
11215	AKAP11	-0.34	0.119	FALSE	-0.243	0.127	FALSE	-0.199	0.159	FALSE	-0.12	0.082	FALSE	-0.05	0.033	FALSE
9590	AKAP12	-0.328	0.027	FALSE	-0.264	-0.003	FALSE	-0.218	-0.032	FALSE	-0.177	0.024	FALSE	-0.103	0.033	FALSE
11214	AKAP13	-0.414	0.085	FALSE	-0.358	0.162	FALSE	-0.304	0.225	FALSE	-0.242	0.216	FALSE	-0.142	0.232	FALSE
158798	AKAP14	-0.332	0.086	FALSE	-0.245	0.042	FALSE	-0.188	0.085	FALSE	-0.145	0.066	FALSE	-0.075	-0.001	FALSE
8227	AKAP17A	-0.375	-0.125	FALSE	-0.328	-0.172	FALSE	-0.293	-0.147	FALSE	-0.249	-0.109	FALSE	-0.181	0.049	FALSE
11217	AKAP2	-0.356	-0.021	FALSE	-0.293	-0.004	FALSE	-0.223	-0.062	FALSE	-0.154	-0.125	FALSE	-0.056	-0.513	FALSE
10566	AKAP3	-0.298	0.07	FALSE	-0.206	0.002	FALSE	-0.135	0.021	FALSE	-0.083	-0.034	FALSE	-0.028	-0.035	FALSE
9495	AKAP5	-0.36	0.06	FALSE	-0.31	0.076	FALSE	-0.266	0.078	FALSE	-0.207	0.073	FALSE	-0.106	-0.135	FALSE
9472	AKAP6	-0.236	0.164	FALSE	-0.179	0.217	FALSE	-0.133	0.244	FALSE	-0.091	0.317	FALSE	-0.034	0.475	FALSE
9465	AKAP7	-0.31	-0.055	FALSE	-0.251	-0.16	FALSE	-0.222	-0.135	FALSE	-0.181	-0.171	FALSE	-0.121	-0.203	FALSE
10270	AKAP8	-0.352	0.053	FALSE	-0.311	0.106	FALSE	-0.266	0.094	FALSE	-0.213	0.073	FALSE	-0.134	0.177	FALSE
26993	AKAP8L	-0.337	-0.144	FALSE	-0.309	-0.153	FALSE	-0.254	-0.239	FALSE	-0.215	-0.283	FALSE	-0.145	-0.308	FALSE
10142	AKAP9	-0.34	-0.004	FALSE	-0.273	-0.005	FALSE	-0.223	0.05	FALSE	-0.151	-0.001	FALSE	-0.09	0.015	FALSE
56672	AKIP1	-0.222	-0.175	FALSE	-0.164	-0.135	FALSE	-0.142	-0.115	FALSE	-0.104	-0.109	FALSE	-0.047	-0.128	FALSE
79647	AKIRIN1	-0.293	-0.149	FALSE	-0.271	-0.109	FALSE	-0.228	-0.115	FALSE	-0.198	-0.063	FALSE	-0.137	-0.128	FALSE
80709	AKNA	-0.339	-0.004	FALSE	-0.291	0.001	FALSE	-0.251	0.077	FALSE	-0.203	0.094	FALSE	-0.123	0.042	FALSE
10327	AKR1A1	-0.525	0.175	TRUE	-0.485	0.255	TRUE	-0.409	0.233	TRUE	-0.285	0.112	TRUE	-0.188	0.153	TRUE
231	AKR1B1	-0.299	-0.009	FALSE	-0.218	-0.052	FALSE	-0.188	-0.013	FALSE	-0.137	-0.033	FALSE	-0.074	-0.019	FALSE
57016	AKR1B10	-0.327	-0.066	FALSE	-0.259	-0.068	FALSE	-0.195	-0.054	FALSE	-0.143	-0.042	FALSE	-0.059	-0.023	FALSE
441282	AKR1B15	-0.352	-0.066	FALSE	-0.256	-0.059	FALSE	-0.207	-0.059	FALSE	-0.155	-0.107	FALSE	-0.061	-0.321	FALSE
1645	AKR1C1	-0.214	-0.043	FALSE	-0.175	0.002	FALSE	-0.141	-0.012	FALSE	-0.089	-0.097	FALSE	-0.032	-0.134	FALSE
1646	AKR1C2	-0.499	0.172	TRUE	-0.419	0.18	TRUE	-0.336	0.175	TRUE	-0.235	0.163	TRUE	-0.148	0.215	TRUE
8644	AKR1C3	-0.334	0.043	FALSE	-0.281	0.013	FALSE	-0.224	0.009	FALSE	-0.186	0.042	FALSE	-0.107	0.05	FALSE
1109	AKR1C4	-0.412	0.167	FALSE	-0.33	0.194	FALSE	-0.272	0.156	FALSE	-0.213	0.131	FALSE	-0.107	0.171	FALSE
6718	AKR1D1	-0.277	0.074	FALSE	-0.235	0.064	FALSE	-0.197	0.088	FALSE	-0.144	0.14	FALSE	-0.058	0.178	FALSE
83592	AKR1E2	-0.158	0.023	FALSE	-0.127	0.049	FALSE	-0.094	0.095	FALSE	-0.05	0.035	FALSE	0.013	-0.021	FALSE
8574	AKR7A2	-0.301	-0.013	FALSE	-0.238	-0.061	FALSE	-0.202	-0.066	FALSE	-0.164	0.004	FALSE	-0.085	0.02	FALSE
22977	AKR7A3	-0.454	-0.042	TRUE	-0.391	-0.108	TRUE	-0.32	-0.148	TRUE	-0.272	-0.128	TRUE	-0.205	-0.175	TRUE
246181	AKR7L	-0.348	0.288	FALSE	-0.227	0.243	FALSE	-0.187	0.306	FALSE	-0.122	0.323	FALSE	-0.024	0.445	FALSE
207	AKT1	-0.513	0.03	TRUE	-0.403	0.05	TRUE	-0.312	0.023	TRUE	-0.227	-0.014	TRUE	-0.144	0.009	TRUE
84335	AKT1S1	-0.309	-0.009	FALSE	-0.232	-0.032	FALSE	-0.172	-0.003	FALSE	-0.126	-0.039	FALSE	-0.042	-0.186	FALSE
208	AKT2	-0.471	0.177	TRUE	-0.368	0.229	TRUE	-0.272	0.236	TRUE	-0.205	0.26	TRUE	-0.101	0.434	TRUE
10000	AKT3	-0.327	0.06	FALSE	-0.25	0.117	FALSE	-0.165	0.14	FALSE	-0.096	0.134	FALSE	-0.017	0.122	FALSE
64400	AKTIP	-0.312	0.161	FALSE	-0.254	0.141	FALSE	-0.205	0.173	FALSE	-0.137	0.144	FALSE	-0.064	0.288	FALSE
210	ALAD	-0.289	0.061	FALSE	-0.238	0.093	FALSE	-0.199	0.113	FALSE	-0.13	0.067	FALSE	-0.068	0.002	FALSE
211	ALAS1	-0.314	0.025	FALSE	-0.245	0	FALSE	-0.196	0.044	FALSE	-0.157	0.119	FALSE	-0.064	0.064	FALSE
212	ALAS2	-0.249	0.002	FALSE	-0.212	0.005	FALSE	-0.163	0.037	FALSE	-0.1	0.041	FALSE	-0.026	0.097	FALSE
213	ALB	-0.383	0.005	FALSE	-0.3	0.038	FALSE	-0.262	0.05	FALSE	-0.211	0.037	FALSE	-0.119	0.044	FALSE
214	ALCAM	-0.356	0.236	FALSE	-0.279	0.146	FALSE	-0.224	0.171	FALSE	-0.177	0.122	FALSE	-0.08	-0.014	FALSE
126133	ALDH16A1	-0.39	-0.069	FALSE	-0.313	-0.009	FALSE	-0.27	0.039	FALSE	-0.213	0.013	FALSE	-0.138	0.106	FALSE
5832	ALDH18A1	-0.806	0.093	TRUE	-0.606	0.064	TRUE	-0.458	0.004	TRUE	-0.344	-0.028	TRUE	-0.231	-0.029	TRUE
216	ALDH1A1	-0.208	-0.149	FALSE	-0.155	-0.128	FALSE	-0.13	-0.149	FALSE	-0.085	-0.187	FALSE	-0.036	-0.232	FALSE
8854	ALDH1A2	-0.472	0.063	TRUE	-0.402	0.089	TRUE	-0.346	0.1	TRUE	-0.296	0.105	TRUE	-0.22	0.135	TRUE
220	ALDH1A3	-0.263	-0.009	FALSE	-0.215	-0.022	FALSE	-0.184	0.01	FALSE	-0.151	0.046	FALSE	-0.087	0.072	FALSE
219	ALDH1B1	-0.39	-0.074	FALSE	-0.357	-0.072	FALSE	-0.301	-0.093	FALSE	-0.242	-0.181	FALSE	-0.167	-0.13	FALSE
10840	ALDH1L1	-0.365	0.199	FALSE	-0.309	0.265	FALSE	-0.239	0.298	FALSE	-0.179	0.365	FALSE	-0.088	0.48	FALSE
160428	ALDH1L2	-0.362	0.103	FALSE	-0.224	0.11	FALSE	-0.15	0.128	FALSE	-0.081	0.127	FALSE	-0.019	0.053	FALSE
217	ALDH2	-0.495	-0.035	TRUE	-0.406	-0.068	TRUE	-0.363	-0.026	TRUE	-0.317	0.036	TRUE	-0.22	0.076	TRUE
218	ALDH3A1	-0.331	-0.161	FALSE	-0.291	-0.2	FALSE	-0.249	-0.179	FALSE	-0.212	-0.146	FALSE	-0.147	-0.151	FALSE
222	ALDH3B2	-0.398	-0.151	FALSE	-0.322	-0.124	FALSE	-0.257	-0.143	FALSE	-0.202	-0.175	FALSE	-0.136	-0.163	FALSE
8659	ALDH4A1	-0.294	0	FALSE	-0.253	0.034	FALSE	-0.222	0.061	FALSE	-0.168	0.083	FALSE	-0.089	0.046	FALSE
7915	ALDH5A1	-0.256	-0.14	FALSE	-0.22	-0.11	FALSE	-0.199	-0.119	FALSE	-0.155	-0.136	FALSE	-0.098	-0.059	FALSE
501	ALDH7A1	-0.383	-0.046	FALSE	-0.302	-0.072	FALSE	-0.268	-0.032	FALSE	-0.208	-0.015	FALSE	-0.119	-0.019	FALSE
64577	ALDH8A1	-0.337	-0.008	FALSE	-0.264	-0.024	FALSE	-0.213	-0.011	FALSE	-0.152	-0.03	FALSE	-0.084	-0.109	FALSE
223	ALDH9A1	-0.343	0.257	FALSE	-0.303	0.419	FALSE	-0.23	0.428	FALSE	-0.178	0.519	FALSE	-0.062	0.71	FALSE
226	ALDOA	-1.256	-0.072	TRUE	-1.159	-0.028	TRUE	-1.082	-0.074	TRUE	-0.999	-0.083	TRUE	-0.848	-0.085	TRUE
229	ALDOB	-0.319	0.195	FALSE	-0.289	0.293	FALSE	-0.23	0.325	FALSE	-0.155	0.425	FALSE	-0.061	0.51	FALSE
230	ALDOC	-0.566	-0.003	TRUE	-0.509	0.006	TRUE	-0.41	-0.006	TRUE	-0.363	0.031	TRUE	-0.27	-0.006	TRUE
56052	ALG1	-0.668	-0.07	TRUE	-0.608	-0.001	TRUE	-0.579	0.069	TRUE	-0.516	0.135	TRUE	-0.35	0.115	TRUE
84920	ALG10	-0.364	0.007	FALSE	-0.289	-0.036	FALSE	-0.253	-0.01	FALSE	-0.198	-0.061	FALSE	-0.134	-0.09	FALSE
144245	ALG10B	-0.729	-0.044	TRUE	-0.633	0.002	TRUE	-0.522	-0.019	TRUE	-0.458	-0.036	TRUE	-0.357	-0.06	TRUE
440138	ALG11	-0.962	0.02	TRUE	-0.89	0.064	TRUE	-0.83	0.1	TRUE	-0.787	0.204	TRUE	-0.716	0.593	TRUE
79087	ALG12	-0.52	0.172	TRUE	-0.392	0.166	TRUE	-0.293	0.152	TRUE	-0.233	0.178	TRUE	-0.145	0.313	TRUE
79868	ALG13	-0.959	0.236	TRUE	-0.876	0.246	TRUE	-0.813	0.301	TRUE	-0.752	0.415	TRUE	-0.487	0.382	TRUE
200810	ALG1L	-0.502	-0.076	TRUE	-0.442	-0.068	TRUE	-0.411	-0.018	TRUE	-0.373	0.014	TRUE	-0.301	0.218	TRUE
85365	ALG2	-0.826	0.048	TRUE	-0.768	0.086	TRUE	-0.722	0.136	TRUE	-0.664	0.211	TRUE	-0.421	0.108	TRUE
10195	ALG3	-0.194	0.077	FALSE	-0.167	0.094	FALSE	-0.142	0.108	FALSE	-0.088	0.141	FALSE	0.001	0.224	FALSE
29880	ALG5	-0.519	0.086	TRUE	-0.447	0.056	TRUE	-0.349	-0.008	TRUE	-0.309	0.043	TRUE	-0.228	0.075	TRUE
29929	ALG6	-0.342	0.164	FALSE	-0.273	0.214	FALSE	-0.233	0.257	FALSE	-0.153	0.259	FALSE	-0.065	0.333	FALSE
79053	ALG8	-0.343	-0.025	FALSE	-0.308	-0.082	FALSE	-0.274	-0.097	FALSE	-0.217	-0.114	FALSE	-0.15	-0.096	FALSE
79796	ALG9	-0.328	0.09	FALSE	-0.26	0.057	FALSE	-0.23	0.093	FALSE	-0.161	0.123	FALSE	-0.092	0.151	FALSE
238	ALK	-0.3	-0.016	FALSE	-0.25	-0.013	FALSE	-0.176	-0.04	FALSE	-0.12	-0.07	FALSE	-0.064	-0.033	FALSE
389658	ALKAL1	-0.257	0.095	FALSE	-0.205	0.126	FALSE	-0.158	0.083	FALSE	-0.085	-0.117	FALSE	-0.032	-0.397	FALSE
8846	ALKBH1	-0.317	-0.062	FALSE	-0.253	-0.136	FALSE	-0.213	-0.162	FALSE	-0.164	-0.234	FALSE	-0.109	-0.308	FALSE
121642	ALKBH2	-0.24	0.035	FALSE	-0.152	-0.061	FALSE	-0.128	0.021	FALSE	-0.072	0.047	FALSE	-0.01	0.167	FALSE
221120	ALKBH3	-0.415	-0.062	FALSE	-0.365	-0.067	FALSE	-0.322	-0.042	FALSE	-0.275	-0.012	FALSE	-0.193	-0.006	FALSE
54784	ALKBH4	-0.294	0.11	FALSE	-0.219	0.15	FALSE	-0.166	0.131	FALSE	-0.12	0.165	FALSE	-0.051	0.166	FALSE
54890	ALKBH5	-0.345	0.01	FALSE	-0.299	-0.071	FALSE	-0.258	-0.057	FALSE	-0.212	-0.024	FALSE	-0.13	-0.028	FALSE
84266	ALKBH7	-0.317	0.139	FALSE	-0.249	0.103	FALSE	-0.188	0.098	FALSE	-0.131	0.094	FALSE	-0.059	0.101	FALSE
91801	ALKBH8	-0.308	0.074	FALSE	-0.25	0.108	FALSE	-0.192	0.094	FALSE	-0.129	0.124	FALSE	-0.03	0.011	FALSE
55821	ALLC	-0.37	0.288	FALSE	-0.266	0.186	FALSE	-0.223	0.228	FALSE	-0.172	0.225	FALSE	-0.087	0.08	FALSE
7840	ALMS1	-0.275	0.159	FALSE	-0.233	0.258	FALSE	-0.186	0.257	FALSE	-0.122	0.267	FALSE	-0.039	0.274	FALSE
239	ALOX12	-0.25	0.146	FALSE	-0.169	0.137	FALSE	-0.13	0.151	FALSE	-0.077	0.173	FALSE	-0.007	0.238	FALSE
242	ALOX12B	-0.253	0.069	FALSE	-0.192	0.084	FALSE	-0.136	0.127	FALSE	-0.093	0.182	FALSE	-0.011	0.265	FALSE
246	ALOX15	-0.356	-0.07	FALSE	-0.324	-0.042	FALSE	-0.24	-0.023	FALSE	-0.2	0.049	FALSE	-0.121	0.129	FALSE
247	ALOX15B	-0.424	0.206	FALSE	-0.332	0.21	FALSE	-0.279	0.197	FALSE	-0.206	0.162	FALSE	-0.121	0.198	FALSE
240	ALOX5	-0.353	0.172	FALSE	-0.239	0.05	FALSE	-0.202	0.072	FALSE	-0.157	0.119	FALSE	-0.079	0.083	FALSE
241	ALOX5AP	-0.306	0.027	FALSE	-0.269	0.117	FALSE	-0.195	0.109	FALSE	-0.13	0.073	FALSE	-0.063	0.105	FALSE
59344	ALOXE3	-0.618	0.042	TRUE	-0.488	0.025	TRUE	-0.443	0.019	TRUE	-0.376	-0.008	TRUE	-0.287	0.022	TRUE
251	ALPG	-0.34	0.096	FALSE	-0.27	0.093	FALSE	-0.236	0.121	FALSE	-0.18	0.165	FALSE	-0.107	0.231	FALSE
248	ALPI	-0.316	-0.165	FALSE	-0.284	-0.11	FALSE	-0.239	-0.205	FALSE	-0.183	-0.213	FALSE	-0.124	-0.23	FALSE
80216	ALPK1	-0.396	0.06	FALSE	-0.315	0.049	FALSE	-0.247	0.015	FALSE	-0.192	-0.081	FALSE	-0.111	-0.144	FALSE
115701	ALPK2	-0.273	0.073	FALSE	-0.215	0.093	FALSE	-0.162	0.064	FALSE	-0.111	0.066	FALSE	-0.053	0.155	FALSE
57538	ALPK3	-0.23	0.042	FALSE	-0.205	0.014	FALSE	-0.178	0.069	FALSE	-0.131	0.101	FALSE	-0.062	0.261	FALSE
249	ALPL	-0.321	0.127	FALSE	-0.259	0.073	FALSE	-0.216	0.082	FALSE	-0.135	0.085	FALSE	-0.054	-0.067	FALSE
250	ALPP	-0.258	0.134	FALSE	-0.153	0.154	FALSE	-0.111	0.17	FALSE	-0.054	0.265	FALSE	0.026	0.34	FALSE
57679	ALS2	-0.32	0.072	FALSE	-0.259	0.139	FALSE	-0.158	0.125	FALSE	-0.11	0.098	FALSE	-0.054	0.232	FALSE
259173	ALS2CL	-0.339	0.006	FALSE	-0.276	0	FALSE	-0.229	0.02	FALSE	-0.189	0.025	FALSE	-0.105	0.083	FALSE
130540	FLACC1	-0.11	0.029	FALSE	-0.078	-0.02	FALSE	-0.067	0.038	FALSE	-0.053	0.141	FALSE	-0.029	0.262	FALSE
8092	ALX1	-0.324	-0.11	FALSE	-0.287	-0.06	FALSE	-0.249	-0.068	FALSE	-0.204	-0.1	FALSE	-0.143	-0.054	FALSE
257	ALX3	-0.366	0.046	FALSE	-0.318	-0.029	FALSE	-0.262	-0.073	FALSE	-0.215	-0.072	FALSE	-0.146	-0.067	FALSE
60529	ALX4	-0.278	-0.12	FALSE	-0.22	-0.119	FALSE	-0.184	-0.117	FALSE	-0.148	-0.087	FALSE	-0.089	-0.105	FALSE
10189	ALYREF	-1.801	-0.009	TRUE	-1.649	0.024	TRUE	-1.547	-0.01	TRUE	-1.433	-0.043	TRUE	-1.267	-0.049	TRUE
23600	AMACR	-0.234	0.07	FALSE	-0.21	0.099	FALSE	-0.141	0.06	FALSE	-0.068	0.012	FALSE	-0.021	0.003	FALSE
258	AMBN	-0.128	-0.185	FALSE	-0.114	-0.164	FALSE	-0.087	-0.159	FALSE	-0.064	-0.154	FALSE	-0.044	-0.134	FALSE
259	AMBP	-0.372	-0.131	FALSE	-0.331	-0.061	FALSE	-0.278	-0.042	FALSE	-0.218	-0.104	FALSE	-0.127	-0.128	FALSE
55626	AMBRA1	-0.557	0.247	TRUE	-0.41	0.093	TRUE	-0.357	0.063	TRUE	-0.31	0.136	TRUE	-0.222	0.261	TRUE
262	AMD1	-0.654	-0.047	TRUE	-0.606	-0.047	TRUE	-0.565	-0.027	TRUE	-0.493	-0.026	TRUE	-0.38	0.016	TRUE
144193	AMDHD1	-0.26	0.046	FALSE	-0.22	0.024	FALSE	-0.188	0.109	FALSE	-0.108	0.019	FALSE	-0.043	-0.077	FALSE
51005	AMDHD2	-0.248	-0.022	FALSE	-0.159	-0.007	FALSE	-0.127	-0.073	FALSE	-0.082	-0.064	FALSE	-0.031	0.07	FALSE
265	AMELX	-0.225	0.172	FALSE	-0.156	0.098	FALSE	-0.113	0.061	FALSE	-0.069	0.033	FALSE	-0.009	-0.086	FALSE
139285	AMER1	-0.9	0.084	TRUE	-0.847	0.205	TRUE	-0.752	0.302	TRUE	-0.658	0.476	TRUE	-0.524	0.434	TRUE
205147	AMER3	-0.144	-0.027	FALSE	-0.108	-0.062	FALSE	-0.094	-0.1	FALSE	-0.066	-0.053	FALSE	-0.042	-0.11	FALSE
267	AMFR	-0.383	0.048	FALSE	-0.272	-0.002	FALSE	-0.222	0.014	FALSE	-0.182	0.117	FALSE	-0.089	0.114	FALSE
268	AMH	-0.309	0.009	FALSE	-0.222	0.041	FALSE	-0.194	-0.018	FALSE	-0.149	-0.001	FALSE	-0.083	-0.104	FALSE
269	AMHR2	-0.317	-0.011	FALSE	-0.267	0.035	FALSE	-0.194	0.01	FALSE	-0.154	0.006	FALSE	-0.072	0.04	FALSE
57463	AMIGO1	-0.274	0.092	FALSE	-0.216	-0.02	FALSE	-0.153	-0.028	FALSE	-0.111	-0.051	FALSE	-0.043	-0.183	FALSE
347902	AMIGO2	-0.38	-0.091	FALSE	-0.25	-0.111	FALSE	-0.181	-0.178	FALSE	-0.12	-0.268	FALSE	-0.073	-0.23	FALSE
386724	AMIGO3	-0.364	-0.117	FALSE	-0.306	-0.119	FALSE	-0.253	-0.157	FALSE	-0.18	-0.261	FALSE	-0.085	-0.317	FALSE
9949	AMMECR1	-0.589	0.407	TRUE	-0.546	0.406	TRUE	-0.443	0.33	TRUE	-0.353	0.258	TRUE	-0.155	0.165	TRUE
81693	AMN	-0.338	0.115	FALSE	-0.273	0.057	FALSE	-0.205	-0.01	FALSE	-0.139	-0.12	FALSE	-0.061	-0.405	FALSE
196394	AMN1	-0.146	0.13	FALSE	-0.08	0.12	FALSE	-0.065	0.106	FALSE	-0.042	0.141	FALSE	-0.016	0.168	FALSE
154796	AMOT	-0.466	-0.029	TRUE	-0.428	0.024	TRUE	-0.338	0.001	TRUE	-0.239	-0.091	TRUE	-0.111	-0.151	TRUE
154810	AMOTL1	-0.403	-0.034	FALSE	-0.324	-0.101	FALSE	-0.285	-0.135	FALSE	-0.232	-0.106	FALSE	-0.114	-0.122	FALSE
51421	AMOTL2	-0.299	0.599	FALSE	-0.195	0.444	FALSE	-0.137	0.318	FALSE	-0.091	0.301	FALSE	-0.024	-0.033	FALSE
270	AMPD1	-0.45	-0.007	TRUE	-0.376	-0.017	TRUE	-0.31	-0.036	TRUE	-0.262	-0.01	TRUE	-0.186	0.201	TRUE
271	AMPD2	-0.14	-0.036	FALSE	-0.099	-0.035	FALSE	-0.069	-0.021	FALSE	-0.039	-0.003	FALSE	-0.012	0.154	FALSE
272	AMPD3	-0.441	0.138	TRUE	-0.325	0.101	TRUE	-0.296	0.087	TRUE	-0.225	0.084	TRUE	-0.117	-0.036	TRUE
273	AMPH	-0.247	-0.142	FALSE	-0.215	-0.13	FALSE	-0.198	-0.11	FALSE	-0.148	-0.089	FALSE	-0.076	-0.226	FALSE
275	AMT	-0.354	-0.058	FALSE	-0.3	-0.112	FALSE	-0.261	-0.11	FALSE	-0.208	-0.114	FALSE	-0.134	-0.075	FALSE
401138	AMTN	-0.285	-0.073	FALSE	-0.23	-0.109	FALSE	-0.181	-0.112	FALSE	-0.104	-0.301	FALSE	-0.035	-0.576	FALSE
279	AMY2A	-0.37	0.076	FALSE	-0.294	0.054	FALSE	-0.266	0.084	FALSE	-0.221	0.138	FALSE	-0.141	0.056	FALSE
280	AMY2B	-0.133	0.165	FALSE	-0.099	0.232	FALSE	-0.081	0.356	FALSE	-0.061	0.594	FALSE	-0.031	1.135	FALSE
155185	AMZ1	-0.212	-0.068	FALSE	-0.185	-0.106	FALSE	-0.146	-0.145	FALSE	-0.108	-0.143	FALSE	-0.07	-0.27	FALSE
51321	AMZ2	-0.286	0.009	FALSE	-0.203	0.035	FALSE	-0.142	-0.012	FALSE	-0.073	-0.019	FALSE	-0.015	-0.047	FALSE
64682	ANAPC1	-1.84	0.121	TRUE	-1.641	0.188	TRUE	-1.55	0.25	TRUE	-1.351	0.241	TRUE	-1.193	0.166	TRUE
10393	ANAPC10	-0.513	0.016	TRUE	-0.437	0.027	TRUE	-0.381	0.009	TRUE	-0.318	0.008	TRUE	-0.253	0.009	TRUE
51529	ANAPC11	-0.721	0.011	TRUE	-0.583	-0.068	TRUE	-0.521	-0.077	TRUE	-0.44	-0.11	TRUE	-0.362	-0.05	TRUE
25906	ANAPC15	-0.778	-0.134	TRUE	-0.676	-0.098	TRUE	-0.631	-0.066	TRUE	-0.559	-0.031	TRUE	-0.462	0.054	TRUE
29882	ANAPC2	-0.838	0.014	TRUE	-0.782	0.064	TRUE	-0.737	0.047	TRUE	-0.682	0.098	TRUE	-0.583	0.271	TRUE
29945	ANAPC4	-1.48	-0.142	TRUE	-1.355	-0.149	TRUE	-1.277	-0.142	TRUE	-1.131	-0.226	TRUE	-0.988	-0.226	TRUE
51433	ANAPC5	-1.574	0.013	TRUE	-1.391	-0.028	TRUE	-1.32	-0.016	TRUE	-1.208	-0.009	TRUE	-1.051	-0.149	TRUE
51434	ANAPC7	-0.347	-0.219	FALSE	-0.291	-0.215	FALSE	-0.261	-0.217	FALSE	-0.215	-0.265	FALSE	-0.129	-0.349	FALSE
283	ANG	-0.724	-0.07	TRUE	-0.578	-0.077	TRUE	-0.527	-0.001	TRUE	-0.466	0.096	TRUE	-0.347	0.29	TRUE
23357	ANGEL1	-0.354	0.065	FALSE	-0.278	-0.022	FALSE	-0.2	-0.04	FALSE	-0.145	-0.08	FALSE	-0.067	-0.246	FALSE
90806	ANGEL2	-0.591	0.034	TRUE	-0.498	0.03	TRUE	-0.426	0.015	TRUE	-0.372	0.051	TRUE	-0.275	0.128	TRUE
285	ANGPT2	-0.241	-0.064	FALSE	-0.169	-0.075	FALSE	-0.133	-0.023	FALSE	-0.096	-0.019	FALSE	-0.041	-0.098	FALSE
51378	ANGPT4	-0.513	0.261	TRUE	-0.444	0.271	TRUE	-0.378	0.333	TRUE	-0.313	0.383	TRUE	-0.189	0.632	TRUE
9068	ANGPTL1	-0.235	0.192	FALSE	-0.167	0.164	FALSE	-0.136	0.163	FALSE	-0.053	0.116	FALSE	-0.015	-0.047	FALSE
23452	ANGPTL2	-0.235	-0.145	FALSE	-0.195	-0.238	FALSE	-0.16	-0.299	FALSE	-0.112	-0.414	FALSE	-0.044	-0.51	FALSE
51129	ANGPTL4	-0.294	-0.073	FALSE	-0.252	-0.032	FALSE	-0.197	-0.062	FALSE	-0.13	-0.08	FALSE	-0.047	-0.229	FALSE
253935	ANGPTL5	-0.427	0.372	TRUE	-0.284	0.399	TRUE	-0.213	0.34	TRUE	-0.126	0.269	TRUE	-0.031	0.271	TRUE
83854	ANGPTL6	-0.388	-0.165	FALSE	-0.304	-0.213	FALSE	-0.252	-0.249	FALSE	-0.198	-0.283	FALSE	-0.112	-0.4	FALSE
10218	ANGPTL7	-0.444	-0.248	TRUE	-0.339	-0.284	TRUE	-0.278	-0.297	TRUE	-0.238	-0.242	TRUE	-0.143	-0.196	TRUE
55908	ANGPTL8	-0.273	-0.028	FALSE	-0.201	-0.138	FALSE	-0.132	-0.218	FALSE	-0.094	-0.269	FALSE	-0.044	-0.487	FALSE
286	ANK1	-0.228	0.201	FALSE	-0.202	0.251	FALSE	-0.151	0.291	FALSE	-0.091	0.363	FALSE	0	0.447	FALSE
287	ANK2	-0.225	-0.058	FALSE	-0.179	-0.028	FALSE	-0.143	-0.046	FALSE	-0.101	0.033	FALSE	-0.025	0.004	FALSE
288	ANK3	-0.201	-0.149	FALSE	-0.16	-0.133	FALSE	-0.12	-0.08	FALSE	-0.072	-0.053	FALSE	-0.01	-0.1	FALSE
150709	ANKAR	-0.414	0.116	FALSE	-0.298	0.135	FALSE	-0.219	0.025	FALSE	-0.152	-0.092	FALSE	-0.063	-0.213	FALSE
63926	ANKEF1	-0.191	0.091	FALSE	-0.139	0.128	FALSE	-0.105	0.121	FALSE	-0.049	0.064	FALSE	-0.003	0.108	FALSE
162282	ANKFN1	-0.6	0.165	TRUE	-0.523	0.058	TRUE	-0.465	0.087	TRUE	-0.388	0.126	TRUE	-0.264	0.391	TRUE
51479	ANKFY1	-0.338	-0.004	FALSE	-0.265	-0.007	FALSE	-0.229	-0.021	FALSE	-0.173	-0.006	FALSE	-0.1	0.015	FALSE
56172	ANKH	-0.534	0.29	TRUE	-0.443	0.233	TRUE	-0.393	0.28	TRUE	-0.331	0.262	TRUE	-0.217	0.32	TRUE
54882	ANKHD1	-0.256	-0.044	FALSE	-0.217	0.015	FALSE	-0.182	0.024	FALSE	-0.13	0.048	FALSE	-0.064	0.051	FALSE
54467	ANKIB1	-0.212	-0.142	FALSE	-0.145	-0.268	FALSE	-0.124	-0.265	FALSE	-0.082	-0.323	FALSE	-0.048	-0.458	FALSE
255239	ANKK1	-0.389	-0.008	FALSE	-0.321	0.008	FALSE	-0.277	0.008	FALSE	-0.232	0.032	FALSE	-0.157	0.151	FALSE
126549	ANKLE1	-0.223	-0.182	FALSE	-0.179	-0.188	FALSE	-0.148	-0.221	FALSE	-0.113	-0.271	FALSE	-0.075	-0.453	FALSE
23141	ANKLE2	-1.197	0.075	TRUE	-1.062	0.125	TRUE	-1.004	0.188	TRUE	-0.956	0.314	TRUE	-0.868	0.831	TRUE
51281	ANKMY1	-0.331	-0.013	FALSE	-0.273	-0.048	FALSE	-0.223	-0.093	FALSE	-0.164	-0.14	FALSE	-0.059	-0.398	FALSE
57037	ANKMY2	-0.286	-0.108	FALSE	-0.234	-0.087	FALSE	-0.182	-0.124	FALSE	-0.121	-0.163	FALSE	-0.066	-0.388	FALSE
57763	ANKRA2	-0.27	-0.085	FALSE	-0.237	-0.1	FALSE	-0.2	-0.041	FALSE	-0.146	-0.092	FALSE	-0.085	-0.057	FALSE
27063	ANKRD1	-0.081	0.127	FALSE	-0.055	0.109	FALSE	-0.038	0.164	FALSE	-0.024	0.289	FALSE	-0.004	0.567	FALSE
55608	ANKRD10	-0.184	-0.008	FALSE	-0.159	-0.136	FALSE	-0.142	-0.115	FALSE	-0.106	-0.113	FALSE	-0.043	-0.316	FALSE
29123	ANKRD11	-0.755	0.158	TRUE	-0.658	0.119	TRUE	-0.565	0.075	TRUE	-0.478	0.096	TRUE	-0.336	0.112	TRUE
23253	ANKRD12	-0.262	-0.185	FALSE	-0.222	-0.171	FALSE	-0.194	-0.118	FALSE	-0.139	-0.19	FALSE	-0.084	-0.228	FALSE
88455	ANKRD13A	-0.264	-0.077	FALSE	-0.223	-0.071	FALSE	-0.183	-0.057	FALSE	-0.118	-0.091	FALSE	-0.054	-0.169	FALSE
124930	ANKRD13B	-0.172	-0.139	FALSE	-0.1	-0.168	FALSE	-0.059	-0.208	FALSE	-0.026	-0.27	FALSE	0.001	-0.348	FALSE
81573	ANKRD13C	-0.159	-0.064	FALSE	-0.115	-0.054	FALSE	-0.096	-0.008	FALSE	-0.069	-0.012	FALSE	-0.036	0.066	FALSE
338692	ANKRD13D	-0.424	-0.004	FALSE	-0.358	-0.003	FALSE	-0.27	-0.102	FALSE	-0.214	-0.11	FALSE	-0.094	-0.144	FALSE
54522	ANKRD16	-0.334	-0.259	FALSE	-0.294	-0.242	FALSE	-0.261	-0.247	FALSE	-0.21	-0.283	FALSE	-0.115	-0.379	FALSE
26057	ANKRD17	-0.993	0.199	TRUE	-0.925	0.227	TRUE	-0.814	0.282	TRUE	-0.709	0.293	TRUE	-0.514	0.171	TRUE
253650	ANKRD18A	-0.337	-0.138	FALSE	-0.328	-0.137	FALSE	-0.269	-0.146	FALSE	-0.193	-0.224	FALSE	-0.114	-0.183	FALSE
26287	ANKRD2	-0.346	-0.007	FALSE	-0.267	-0.067	FALSE	-0.218	-0.144	FALSE	-0.162	-0.205	FALSE	-0.067	-0.447	FALSE
118932	ANKRD22	-0.471	-0.151	TRUE	-0.424	-0.094	TRUE	-0.363	-0.094	TRUE	-0.276	-0.159	TRUE	-0.147	-0.369	TRUE
200539	ANKRD23	-0.37	-0.087	FALSE	-0.273	-0.173	FALSE	-0.228	-0.191	FALSE	-0.184	-0.211	FALSE	-0.114	-0.432	FALSE
170961	ANKRD24	-0.446	-0.216	TRUE	-0.403	-0.195	TRUE	-0.302	-0.291	TRUE	-0.249	-0.312	TRUE	-0.168	-0.327	TRUE
22852	ANKRD26	-0.235	-0.179	FALSE	-0.185	-0.252	FALSE	-0.147	-0.216	FALSE	-0.108	-0.183	FALSE	-0.051	-0.191	FALSE
84079	ANKRD27	-0.32	-0.104	FALSE	-0.273	-0.122	FALSE	-0.224	-0.186	FALSE	-0.184	-0.2	FALSE	-0.117	-0.198	FALSE
23243	ANKRD28	-0.383	0.076	FALSE	-0.29	0.038	FALSE	-0.238	-0.042	FALSE	-0.185	-0.057	FALSE	-0.125	0.056	FALSE
147463	ANKRD29	-0.269	0.051	FALSE	-0.213	0.065	FALSE	-0.146	0.119	FALSE	-0.093	0.205	FALSE	-0.016	0.339	FALSE
91074	ANKRD30A	-0.342	0.041	FALSE	-0.282	0.072	FALSE	-0.252	0.131	FALSE	-0.204	0.166	FALSE	-0.108	0.186	FALSE
374860	ANKRD30B	-0.349	-0.031	FALSE	-0.32	-0.013	FALSE	-0.273	-0.035	FALSE	-0.2	-0.035	FALSE	-0.113	-0.128	FALSE
256006	ANKRD31	-0.601	-0.031	TRUE	-0.53	0.04	TRUE	-0.469	-0.018	TRUE	-0.388	-0.02	TRUE	-0.272	0.069	TRUE
341405	ANKRD33	-0.216	0.003	FALSE	-0.19	-0.081	FALSE	-0.126	-0.216	FALSE	-0.098	-0.239	FALSE	-0.056	-0.424	FALSE
651746	ANKRD33B	-0.323	-0.091	FALSE	-0.2	-0.157	FALSE	-0.141	-0.2	FALSE	-0.092	-0.245	FALSE	-0.049	-0.382	FALSE
340120	ANKRD34B	-0.247	0.06	FALSE	-0.167	0.043	FALSE	-0.117	0.037	FALSE	-0.076	0.031	FALSE	-0.049	-0.006	FALSE
390616	ANKRD34C	-0.497	0.003	TRUE	-0.377	-0.034	TRUE	-0.306	-0.114	TRUE	-0.222	-0.136	TRUE	-0.085	-0.321	TRUE
148741	ANKRD35	-0.269	0.007	FALSE	-0.212	0.038	FALSE	-0.178	0.09	FALSE	-0.132	0.164	FALSE	-0.068	0.161	FALSE
57730	ANKRD36B	-0.583	-0.112	TRUE	-0.546	-0.064	TRUE	-0.502	-0.006	TRUE	-0.466	-0.057	TRUE	-0.395	-0.047	TRUE
353322	ANKRD37	-0.284	0	FALSE	-0.236	0.07	FALSE	-0.193	0.057	FALSE	-0.146	-0.02	FALSE	-0.081	-0.05	FALSE
91369	ANKRD40	-0.263	-0.133	FALSE	-0.236	-0.072	FALSE	-0.198	-0.105	FALSE	-0.154	-0.102	FALSE	-0.098	-0.049	FALSE
338699	ANKRD42	-0.336	-0.071	FALSE	-0.275	-0.084	FALSE	-0.254	-0.094	FALSE	-0.183	-0.186	FALSE	-0.088	-0.316	FALSE
91526	ANKRD44	-0.402	0.188	FALSE	-0.342	0.17	FALSE	-0.273	0.071	FALSE	-0.224	0.069	FALSE	-0.12	0.022	FALSE
339416	ANKRD45	-0.27	0.046	FALSE	-0.184	0.015	FALSE	-0.122	-0.009	FALSE	-0.076	-0.106	FALSE	-0.011	-0.476	FALSE
157567	ANKRD46	-0.277	0.018	FALSE	-0.238	0.036	FALSE	-0.169	0.062	FALSE	-0.093	-0.062	FALSE	-0.038	-0.147	FALSE
54851	ANKRD49	-0.636	-0.038	TRUE	-0.563	-0.035	TRUE	-0.504	-0.05	TRUE	-0.449	-0.086	TRUE	-0.356	-0.082	TRUE
57182	ANKRD50	-0.325	-0.088	FALSE	-0.229	-0.158	FALSE	-0.186	-0.228	FALSE	-0.129	-0.285	FALSE	-0.055	-0.511	FALSE
79998	ANKRD53	-0.201	-0.029	FALSE	-0.157	0.058	FALSE	-0.113	0.09	FALSE	-0.078	0.1	FALSE	-0.052	-0.015	FALSE
22881	ANKRD6	-0.291	0.136	FALSE	-0.2	0.104	FALSE	-0.157	0.073	FALSE	-0.101	0.084	FALSE	-0.039	0.026	FALSE
342850	ANKRD62	-0.3	-0.08	FALSE	-0.233	-0.067	FALSE	-0.172	-0.12	FALSE	-0.108	-0.221	FALSE	-0.043	-0.444	FALSE
441869	ANKRD65	-0.34	-0.136	FALSE	-0.273	-0.146	FALSE	-0.203	-0.2	FALSE	-0.146	-0.267	FALSE	-0.068	-0.472	FALSE
100287718	ANKRD66	-0.634	-0.091	TRUE	-0.507	-0.076	TRUE	-0.432	-0.027	TRUE	-0.371	0.103	TRUE	-0.249	0.47	TRUE
56311	ANKRD7	-0.307	0.098	FALSE	-0.238	0.142	FALSE	-0.154	0.182	FALSE	-0.121	0.095	FALSE	-0.052	0.026	FALSE
23294	ANKS1A	-0.485	0.317	TRUE	-0.312	0.159	TRUE	-0.251	0.204	TRUE	-0.189	0.158	TRUE	-0.075	-0.026	TRUE
124401	ANKS3	-0.225	0.159	FALSE	-0.175	0.162	FALSE	-0.138	0.022	FALSE	-0.096	-0.017	FALSE	-0.058	0.162	FALSE
257629	ANKS4B	-0.231	0.012	FALSE	-0.171	-0.057	FALSE	-0.13	-0.119	FALSE	-0.069	-0.228	FALSE	-0.029	-0.423	FALSE
203286	ANKS6	-0.331	-0.07	FALSE	-0.296	-0.036	FALSE	-0.262	-0.018	FALSE	-0.205	-0.028	FALSE	-0.148	-0.031	FALSE
55139	ANKZF1	-0.254	-0.15	FALSE	-0.177	-0.206	FALSE	-0.145	-0.209	FALSE	-0.11	-0.213	FALSE	-0.064	-0.334	FALSE
54443	ANLN	-0.891	0.17	TRUE	-0.815	0.201	TRUE	-0.627	0.193	TRUE	-0.504	0.191	TRUE	-0.353	0.125	TRUE
55107	ANO1	-0.289	-0.098	FALSE	-0.264	-0.052	FALSE	-0.23	-0.013	FALSE	-0.196	0.045	FALSE	-0.125	0.081	FALSE
55129	ANO10	-0.095	-0.194	FALSE	-0.056	-0.135	FALSE	-0.035	-0.12	FALSE	-0.015	-0.2	FALSE	0.007	-0.343	FALSE
57101	ANO2	-0.28	-0.211	FALSE	-0.223	-0.24	FALSE	-0.155	-0.274	FALSE	-0.12	-0.347	FALSE	-0.055	-0.616	FALSE
63982	ANO3	-0.161	-0.133	FALSE	-0.123	-0.115	FALSE	-0.082	-0.167	FALSE	-0.052	-0.271	FALSE	-0.015	-0.522	FALSE
203859	ANO5	-0.201	-0.144	FALSE	-0.152	-0.193	FALSE	-0.121	-0.229	FALSE	-0.085	-0.281	FALSE	-0.045	-0.375	FALSE
196527	ANO6	-0.108	-0.172	FALSE	-0.089	-0.141	FALSE	-0.058	-0.137	FALSE	-0.044	-0.091	FALSE	-0.021	-0.052	FALSE
57719	ANO8	-0.35	-0.146	FALSE	-0.314	-0.1	FALSE	-0.248	-0.124	FALSE	-0.17	-0.237	FALSE	-0.078	-0.397	FALSE
3730	ANOS1	-0.224	-0.067	FALSE	-0.167	-0.076	FALSE	-0.143	-0.007	FALSE	-0.087	-0.022	FALSE	-0.008	-0.132	FALSE
8125	ANP32A	-0.397	0.104	FALSE	-0.351	0.185	FALSE	-0.282	0.141	FALSE	-0.24	0.172	FALSE	-0.132	0.094	FALSE
10541	ANP32B	-0.438	0.181	TRUE	-0.352	0.202	TRUE	-0.278	0.177	TRUE	-0.224	0.304	TRUE	-0.111	0.076	TRUE
23519	ANP32D	-0.33	0	FALSE	-0.298	0.026	FALSE	-0.237	0.053	FALSE	-0.16	-0.068	FALSE	-0.066	-0.5	FALSE
81611	ANP32E	-0.45	0.19	TRUE	-0.371	0.147	TRUE	-0.303	0.154	TRUE	-0.241	0.121	TRUE	-0.166	0.121	TRUE
290	ANPEP	-0.343	0.04	FALSE	-0.279	0.012	FALSE	-0.203	0.021	FALSE	-0.146	0.013	FALSE	-0.066	-0.005	FALSE
84168	ANTXR1	-0.495	0.037	TRUE	-0.402	0.035	TRUE	-0.335	0.03	TRUE	-0.261	-0.017	TRUE	-0.187	0.078	TRUE
118429	ANTXR2	-0.273	0.1	FALSE	-0.192	0.045	FALSE	-0.141	0.011	FALSE	-0.093	-0.026	FALSE	-0.024	-0.061	FALSE
195977	ANTXRL	-0.277	-0.082	FALSE	-0.214	-0.069	FALSE	-0.175	-0.029	FALSE	-0.142	-0.092	FALSE	-0.097	-0.05	FALSE
301	ANXA1	-0.16	-0.096	FALSE	-0.13	-0.097	FALSE	-0.072	-0.121	FALSE	-0.042	-0.057	FALSE	0.005	-0.08	FALSE
11199	ANXA10	-0.239	-0.018	FALSE	-0.188	-0.033	FALSE	-0.137	-0.043	FALSE	-0.081	-0.08	FALSE	-0.028	-0.154	FALSE
311	ANXA11	-0.305	0.097	FALSE	-0.23	0.08	FALSE	-0.175	0.069	FALSE	-0.12	0.11	FALSE	-0.05	0.188	FALSE
312	ANXA13	-0.342	0.04	FALSE	-0.288	0.089	FALSE	-0.225	0.072	FALSE	-0.172	0.096	FALSE	-0.094	0.18	FALSE
302	ANXA2	-0.253	0.111	FALSE	-0.205	0.126	FALSE	-0.152	0.067	FALSE	-0.117	0.087	FALSE	-0.035	0.09	FALSE
306	ANXA3	-0.344	0.023	FALSE	-0.296	0.055	FALSE	-0.24	0.057	FALSE	-0.205	0.078	FALSE	-0.078	-0.083	FALSE
307	ANXA4	-0.228	0.149	FALSE	-0.188	0.201	FALSE	-0.157	0.257	FALSE	-0.096	0.274	FALSE	-0.007	0.334	FALSE
308	ANXA5	-0.147	0.07	FALSE	-0.099	0.104	FALSE	-0.046	0.152	FALSE	-0.014	0.198	FALSE	0.016	0.582	FALSE
309	ANXA6	-0.394	0.019	FALSE	-0.346	0.062	FALSE	-0.284	0.089	FALSE	-0.232	0.098	FALSE	-0.151	0.047	FALSE
310	ANXA7	-0.444	0.153	TRUE	-0.365	0.178	TRUE	-0.311	0.199	TRUE	-0.263	0.204	TRUE	-0.156	0.051	TRUE
8416	ANXA9	-0.532	0.32	TRUE	-0.47	0.287	TRUE	-0.4	0.264	TRUE	-0.353	0.34	TRUE	-0.243	0.27	TRUE
313	AOAH	-0.288	0.088	FALSE	-0.234	0.068	FALSE	-0.185	0.157	FALSE	-0.133	0.202	FALSE	-0.04	0.169	FALSE
26	AOC1	-0.189	0	FALSE	-0.133	-0.03	FALSE	-0.106	0.044	FALSE	-0.064	0.085	FALSE	-0.03	0.328	FALSE
314	AOC2	-0.206	-0.135	FALSE	-0.194	-0.093	FALSE	-0.169	-0.034	FALSE	-0.125	-0.042	FALSE	-0.067	0.057	FALSE
8639	AOC3	-0.278	-0.131	FALSE	-0.255	-0.187	FALSE	-0.214	-0.174	FALSE	-0.165	-0.194	FALSE	-0.102	-0.251	FALSE
316	AOX1	-0.222	0.192	FALSE	-0.164	0.207	FALSE	-0.107	0.246	FALSE	-0.046	0.307	FALSE	0.003	0.482	FALSE
55435	AP1AR	-0.501	-0.113	TRUE	-0.443	-0.088	TRUE	-0.367	-0.087	TRUE	-0.314	0.018	TRUE	-0.207	0.309	TRUE
162	AP1B1	-0.5	-0.035	TRUE	-0.377	-0.074	TRUE	-0.312	-0.053	TRUE	-0.245	-0.104	TRUE	-0.159	-0.06	TRUE
164	AP1G1	-0.323	-0.039	FALSE	-0.256	0.017	FALSE	-0.209	-0.002	FALSE	-0.153	-0.029	FALSE	-0.077	-0.03	FALSE
8906	AP1G2	-0.49	0.172	TRUE	-0.357	0.11	TRUE	-0.319	0.153	TRUE	-0.272	0.115	TRUE	-0.196	0.105	TRUE
8907	AP1M1	-0.333	0.083	FALSE	-0.26	0.103	FALSE	-0.191	0.12	FALSE	-0.156	0.188	FALSE	-0.072	0.127	FALSE
10053	AP1M2	-0.515	0.079	TRUE	-0.298	-0.092	TRUE	-0.244	-0.156	TRUE	-0.196	-0.215	TRUE	-0.092	-0.401	TRUE
1174	AP1S1	-0.489	0.254	TRUE	-0.424	0.307	TRUE	-0.368	0.401	TRUE	-0.285	0.452	TRUE	-0.167	0.548	TRUE
8905	AP1S2	-0.325	0.354	FALSE	-0.27	0.409	FALSE	-0.206	0.516	FALSE	-0.139	0.588	FALSE	-0.03	0.754	FALSE
130340	AP1S3	-0.148	0.344	FALSE	-0.137	0.411	FALSE	-0.12	0.469	FALSE	-0.09	0.59	FALSE	-0.033	0.952	FALSE
160	AP2A1	-0.383	0.026	FALSE	-0.322	0.074	FALSE	-0.246	0.1	FALSE	-0.173	0.094	FALSE	-0.084	0.131	FALSE
161	AP2A2	-0.258	0.559	FALSE	-0.186	0.499	FALSE	-0.13	0.612	FALSE	-0.051	0.666	FALSE	0.048	0.881	FALSE
163	AP2B1	-0.425	0.351	TRUE	-0.346	0.303	TRUE	-0.23	0.303	TRUE	-0.148	0.247	TRUE	-0.054	0.279	TRUE
1173	AP2M1	-1.544	0.27	TRUE	-1.45	0.344	TRUE	-1.368	0.336	TRUE	-1.168	0.291	TRUE	-0.997	0.389	TRUE
1175	AP2S1	-1.097	0.18	TRUE	-1.038	0.285	TRUE	-0.888	0.236	TRUE	-0.799	0.288	TRUE	-0.652	0.343	TRUE
8546	AP3B1	-0.431	0.262	TRUE	-0.394	0.286	TRUE	-0.316	0.318	TRUE	-0.259	0.322	TRUE	-0.15	0.449	TRUE
8943	AP3D1	-0.265	0.077	FALSE	-0.206	0.059	FALSE	-0.147	0.04	FALSE	-0.102	0.132	FALSE	-0.049	0.087	FALSE
26985	AP3M1	-0.353	0.039	FALSE	-0.291	0.077	FALSE	-0.216	0.044	FALSE	-0.153	0.047	FALSE	-0.084	0.06	FALSE
10947	AP3M2	-0.411	-0.011	FALSE	-0.323	-0.094	FALSE	-0.261	-0.137	FALSE	-0.208	-0.163	FALSE	-0.145	-0.148	FALSE
1176	AP3S1	-0.338	-0.005	FALSE	-0.259	0.017	FALSE	-0.199	0.007	FALSE	-0.159	0.07	FALSE	-0.089	0.063	FALSE
10239	AP3S2	-0.216	0.115	FALSE	-0.174	0.218	FALSE	-0.144	0.337	FALSE	-0.107	0.43	FALSE	-0.049	0.671	FALSE
10717	AP4B1	-0.175	-0.091	FALSE	-0.126	-0.064	FALSE	-0.097	-0.078	FALSE	-0.058	-0.088	FALSE	-0.03	-0.209	FALSE
23431	AP4E1	-0.252	-0.089	FALSE	-0.17	-0.164	FALSE	-0.127	-0.136	FALSE	-0.085	-0.184	FALSE	-0.054	-0.327	FALSE
9179	AP4M1	-0.347	0.174	FALSE	-0.309	0.168	FALSE	-0.276	0.138	FALSE	-0.222	0.131	FALSE	-0.127	0.03	FALSE
11154	AP4S1	-0.337	0.1	FALSE	-0.3	0.133	FALSE	-0.228	0.175	FALSE	-0.165	0.15	FALSE	-0.096	0.224	FALSE
55745	AP5M1	-0.211	0.114	FALSE	-0.14	0.13	FALSE	-0.085	0.083	FALSE	-0.043	0.108	FALSE	0.019	0.287	FALSE
317	APAF1	-0.302	0.091	FALSE	-0.218	0.094	FALSE	-0.186	0.146	FALSE	-0.142	0.182	FALSE	-0.067	0.261	FALSE
320	APBA1	-0.437	0.139	TRUE	-0.356	0.098	TRUE	-0.306	-0.023	TRUE	-0.252	-0.031	TRUE	-0.166	0.021	TRUE
321	APBA2	-0.398	0.153	FALSE	-0.321	0.175	FALSE	-0.247	0.122	FALSE	-0.176	0.129	FALSE	-0.096	-0.056	FALSE
9546	APBA3	-0.201	-0.201	FALSE	-0.158	-0.198	FALSE	-0.104	-0.274	FALSE	-0.05	-0.411	FALSE	-0.008	-0.531	FALSE
322	APBB1	-0.325	0.279	FALSE	-0.242	0.314	FALSE	-0.179	0.331	FALSE	-0.126	0.45	FALSE	-0.03	0.59	FALSE
54518	APBB1IP	-0.153	-0.146	FALSE	-0.096	-0.099	FALSE	-0.069	-0.024	FALSE	-0.038	-0.015	FALSE	-0.002	0.126	FALSE
323	APBB2	-0.33	-0.14	FALSE	-0.293	-0.088	FALSE	-0.238	-0.15	FALSE	-0.193	-0.122	FALSE	-0.113	-0.15	FALSE
10307	APBB3	-0.304	0.148	FALSE	-0.203	0.088	FALSE	-0.158	0.142	FALSE	-0.087	0.077	FALSE	-0.05	0.134	FALSE
324	APC	-0.701	0.329	TRUE	-0.498	0.252	TRUE	-0.357	0.221	TRUE	-0.287	0.254	TRUE	-0.178	0.327	TRUE
10297	APC2	-0.478	-0.074	TRUE	-0.415	-0.041	TRUE	-0.348	-0.066	TRUE	-0.304	-0.018	TRUE	-0.201	-0.044	TRUE
147495	APCDD1	-0.184	0.165	FALSE	-0.141	0.147	FALSE	-0.097	0.091	FALSE	-0.053	0.049	FALSE	0.002	-0.315	FALSE
164284	APCDD1L	-0.383	-0.003	FALSE	-0.254	-0.067	FALSE	-0.182	-0.129	FALSE	-0.091	-0.232	FALSE	-0.021	-0.429	FALSE
325	APCS	-0.218	0.005	FALSE	-0.163	0.053	FALSE	-0.125	0.076	FALSE	-0.1	0.123	FALSE	-0.066	0.087	FALSE
327	APEH	-0.27	0.121	FALSE	-0.186	0.151	FALSE	-0.151	0.217	FALSE	-0.099	0.162	FALSE	-0.055	0.374	FALSE
328	APEX1	-0.293	0.016	FALSE	-0.255	0.09	FALSE	-0.218	0.094	FALSE	-0.177	0.101	FALSE	-0.103	0.02	FALSE
27301	APEX2	-0.509	-0.066	TRUE	-0.434	-0.035	TRUE	-0.357	-0.013	TRUE	-0.274	-0.05	TRUE	-0.163	-0.202	TRUE
51107	APH1A	-0.347	-0.143	FALSE	-0.269	-0.22	FALSE	-0.219	-0.212	FALSE	-0.159	-0.263	FALSE	-0.099	-0.318	FALSE
83464	APH1B	-0.265	-0.009	FALSE	-0.228	0.01	FALSE	-0.176	-0.039	FALSE	-0.12	-0.071	FALSE	-0.059	-0.169	FALSE
8539	API5	-0.439	0.067	TRUE	-0.339	0.08	TRUE	-0.29	0.038	TRUE	-0.224	0.078	TRUE	-0.146	0.04	TRUE
51074	APIP	-0.22	0.001	FALSE	-0.151	-0.005	FALSE	-0.117	-0.039	FALSE	-0.076	-0.099	FALSE	-0.035	-0.208	FALSE
200558	APLF	-0.308	0.068	FALSE	-0.201	0.035	FALSE	-0.121	0.008	FALSE	-0.067	-0.061	FALSE	-0.024	-0.239	FALSE
8862	APLN	-0.198	-0.134	FALSE	-0.139	-0.19	FALSE	-0.108	-0.199	FALSE	-0.05	-0.294	FALSE	0.006	-0.557	FALSE
187	APLNR	-0.245	-0.05	FALSE	-0.21	-0.022	FALSE	-0.153	-0.056	FALSE	-0.105	0	FALSE	-0.04	-0.046	FALSE
333	APLP1	-0.419	0.314	FALSE	-0.317	0.404	FALSE	-0.259	0.409	FALSE	-0.161	0.329	FALSE	-0.082	0.328	FALSE
334	APLP2	-0.365	0.217	FALSE	-0.298	0.127	FALSE	-0.243	0.105	FALSE	-0.187	0.185	FALSE	-0.095	0.192	FALSE
57136	APMAP	-0.319	-0.168	FALSE	-0.262	-0.181	FALSE	-0.207	-0.218	FALSE	-0.166	-0.246	FALSE	-0.08	-0.405	FALSE
335	APOA1	-0.327	0.062	FALSE	-0.26	0.114	FALSE	-0.221	0.144	FALSE	-0.17	0.22	FALSE	-0.075	0.076	FALSE
336	APOA2	-0.468	0.301	TRUE	-0.341	0.248	TRUE	-0.293	0.286	TRUE	-0.226	0.376	TRUE	-0.135	0.409	TRUE
337	APOA4	-0.223	0.347	FALSE	-0.18	0.258	FALSE	-0.112	0.221	FALSE	-0.06	0.209	FALSE	-0.004	0.298	FALSE
116519	APOA5	-0.347	0.094	FALSE	-0.303	0.047	FALSE	-0.27	0.054	FALSE	-0.207	0.074	FALSE	-0.103	-0.049	FALSE
338	APOB	-0.297	0.056	FALSE	-0.244	0.036	FALSE	-0.159	-0.01	FALSE	-0.108	0.044	FALSE	-0.022	-0.007	FALSE
339	APOBEC1	-0.365	-0.162	FALSE	-0.337	-0.164	FALSE	-0.285	-0.177	FALSE	-0.242	-0.168	FALSE	-0.162	-0.146	FALSE
10930	APOBEC2	-0.261	0.097	FALSE	-0.215	0.07	FALSE	-0.164	0.036	FALSE	-0.121	0.019	FALSE	-0.055	0.05	FALSE
200315	APOBEC3A	-0.341	-0.105	FALSE	-0.286	-0.056	FALSE	-0.234	-0.097	FALSE	-0.191	-0.15	FALSE	-0.113	-0.17	FALSE
9582	APOBEC3B	-0.341	-0.24	FALSE	-0.281	-0.294	FALSE	-0.216	-0.4	FALSE	-0.167	-0.45	FALSE	-0.111	-0.441	FALSE
27350	APOBEC3C	-0.249	-0.003	FALSE	-0.192	-0.038	FALSE	-0.145	-0.036	FALSE	-0.103	-0.004	FALSE	-0.035	-0.075	FALSE
140564	APOBEC3D	-0.256	-0.167	FALSE	-0.201	-0.199	FALSE	-0.173	-0.188	FALSE	-0.135	-0.298	FALSE	-0.087	-0.498	FALSE
200316	APOBEC3F	-0.533	0.021	TRUE	-0.423	0.026	TRUE	-0.361	0.077	TRUE	-0.274	-0.015	TRUE	-0.186	0.192	TRUE
60489	APOBEC3G	-0.364	-0.111	FALSE	-0.324	-0.101	FALSE	-0.282	-0.1	FALSE	-0.229	-0.119	FALSE	-0.165	-0.156	FALSE
164668	APOBEC3H	-0.164	0.251	FALSE	-0.089	0.249	FALSE	-0.06	0.292	FALSE	-0.043	0.349	FALSE	-0.002	0.736	FALSE
403314	APOBEC4	-0.15	-0.079	FALSE	-0.118	-0.109	FALSE	-0.086	-0.131	FALSE	-0.039	-0.131	FALSE	-0.007	-0.354	FALSE
55911	APOBR	-0.395	0.081	FALSE	-0.333	0.057	FALSE	-0.241	0.051	FALSE	-0.177	0.035	FALSE	-0.088	-0.181	FALSE
341	APOC1	-0.256	-0.195	FALSE	-0.23	-0.188	FALSE	-0.206	-0.194	FALSE	-0.179	-0.217	FALSE	-0.133	-0.361	FALSE
344	APOC2	-0.26	-0.025	FALSE	-0.216	-0.028	FALSE	-0.164	-0.048	FALSE	-0.112	-0.06	FALSE	-0.054	-0.144	FALSE
345	APOC3	-0.284	0.078	FALSE	-0.217	-0.024	FALSE	-0.174	-0.01	FALSE	-0.118	-0.038	FALSE	-0.046	-0.096	FALSE
346	APOC4	-0.142	0.049	FALSE	-0.119	0.047	FALSE	-0.087	-0.002	FALSE	-0.05	-0.113	FALSE	-0.021	-0.44	FALSE
347	APOD	-0.439	0.015	TRUE	-0.364	0.087	TRUE	-0.282	0.075	TRUE	-0.227	0.078	TRUE	-0.142	0.271	TRUE
348	APOE	-0.44	0.063	TRUE	-0.381	0.012	TRUE	-0.321	-0.054	TRUE	-0.265	-0.068	TRUE	-0.173	-0.041	TRUE
319	APOF	-0.297	0.462	FALSE	-0.231	0.445	FALSE	-0.147	0.323	FALSE	-0.092	0.294	FALSE	-0.055	0.362	FALSE
350	APOH	-0.286	0.101	FALSE	-0.198	0.047	FALSE	-0.124	0.012	FALSE	-0.077	0.063	FALSE	0.009	0.029	FALSE
8542	APOL1	-0.663	-0.002	TRUE	-0.494	-0.079	TRUE	-0.364	-0.134	TRUE	-0.313	-0.055	TRUE	-0.173	0.026	TRUE
23780	APOL2	-0.766	-0.038	TRUE	-0.704	0.056	TRUE	-0.639	0.156	TRUE	-0.574	0.322	TRUE	-0.475	0.318	TRUE
80833	APOL3	-0.104	0.04	FALSE	-0.072	0.071	FALSE	-0.05	0.157	FALSE	-0.032	0.213	FALSE	-0.004	0.31	FALSE
80831	APOL5	-0.244	-0.308	FALSE	-0.203	-0.35	FALSE	-0.164	-0.364	FALSE	-0.132	-0.4	FALSE	-0.066	-0.595	FALSE
80830	APOL6	-0.274	-0.065	FALSE	-0.218	-0.065	FALSE	-0.171	-0.079	FALSE	-0.118	-0.227	FALSE	-0.034	-0.501	FALSE
81575	APOLD1	-0.265	-0.089	FALSE	-0.198	-0.04	FALSE	-0.17	-0.073	FALSE	-0.124	-0.097	FALSE	-0.074	-0.069	FALSE
55937	APOM	-0.408	0.303	FALSE	-0.309	0.254	FALSE	-0.248	0.171	FALSE	-0.197	0.124	FALSE	-0.095	-0.111	FALSE
79135	APOO	-0.282	0.075	FALSE	-0.222	0.113	FALSE	-0.15	0.077	FALSE	-0.101	0.1	FALSE	-0.027	-0.022	FALSE
139322	APOOL	-0.394	-0.133	FALSE	-0.301	-0.155	FALSE	-0.22	-0.221	FALSE	-0.159	-0.299	FALSE	-0.115	-0.275	FALSE
84334	COA8	-0.163	-0.115	FALSE	-0.119	-0.16	FALSE	-0.1	-0.174	FALSE	-0.078	-0.176	FALSE	-0.052	-0.158	FALSE
351	APP	-0.353	0.094	FALSE	-0.304	0.067	FALSE	-0.25	0.058	FALSE	-0.19	0.085	FALSE	-0.072	-0.225	FALSE
10513	APPBP2	-0.305	0.216	FALSE	-0.229	0.285	FALSE	-0.164	0.267	FALSE	-0.119	0.268	FALSE	-0.039	0.281	FALSE
26060	APPL1	-0.378	-0.11	FALSE	-0.301	-0.119	FALSE	-0.265	-0.101	FALSE	-0.222	-0.102	FALSE	-0.145	-0.008	FALSE
55198	APPL2	-0.14	-0.303	FALSE	-0.09	-0.304	FALSE	-0.062	-0.349	FALSE	-0.036	-0.352	FALSE	-0.003	-0.551	FALSE
353	APRT	-0.574	0.205	TRUE	-0.458	0.164	TRUE	-0.395	0.156	TRUE	-0.329	0.154	TRUE	-0.249	0.157	TRUE
54840	APTX	-0.361	-0.078	FALSE	-0.247	-0.087	FALSE	-0.205	-0.101	FALSE	-0.159	-0.113	FALSE	-0.094	-0.092	FALSE
358	AQP1	-0.267	0.019	FALSE	-0.175	-0.04	FALSE	-0.122	-0.035	FALSE	-0.078	-0.043	FALSE	-0.022	-0.067	FALSE
89872	AQP10	-0.192	0.109	FALSE	-0.157	0.057	FALSE	-0.123	0.083	FALSE	-0.088	0.125	FALSE	-0.044	0.287	FALSE
282679	AQP11	-0.264	-0.134	FALSE	-0.18	-0.193	FALSE	-0.127	-0.237	FALSE	-0.09	-0.225	FALSE	-0.042	-0.232	FALSE
653437	AQP12B	-0.214	0.306	FALSE	-0.177	0.413	FALSE	-0.131	0.474	FALSE	-0.098	0.653	FALSE	-0.05	1.203	FALSE
359	AQP2	-0.313	-0.066	FALSE	-0.28	-0.04	FALSE	-0.243	-0.089	FALSE	-0.193	-0.096	FALSE	-0.124	-0.168	FALSE
360	AQP3	-0.325	0.011	FALSE	-0.222	-0.043	FALSE	-0.187	-0.035	FALSE	-0.142	-0.021	FALSE	-0.067	-0.183	FALSE
361	AQP4	-0.299	0.03	FALSE	-0.231	0.006	FALSE	-0.188	-0.011	FALSE	-0.157	0.005	FALSE	-0.082	0.039	FALSE
362	AQP5	-0.21	0.181	FALSE	-0.152	0.132	FALSE	-0.121	0.112	FALSE	-0.09	0.173	FALSE	-0.035	0.318	FALSE
363	AQP6	-0.333	0.029	FALSE	-0.248	-0.015	FALSE	-0.219	-0.049	FALSE	-0.175	-0.045	FALSE	-0.102	-0.139	FALSE
364	AQP7	-0.574	-0.101	TRUE	-0.553	-0.035	TRUE	-0.525	-0.014	TRUE	-0.479	0.015	TRUE	-0.396	0.004	TRUE
343	AQP8	-0.224	-0.026	FALSE	-0.168	-0.025	FALSE	-0.146	0.04	FALSE	-0.096	-0.022	FALSE	-0.034	-0.091	FALSE
366	AQP9	-0.2	-0.19	FALSE	-0.169	-0.231	FALSE	-0.142	-0.272	FALSE	-0.12	-0.287	FALSE	-0.078	-0.525	FALSE
9716	AQR	-1.314	-0.083	TRUE	-1.24	-0.015	TRUE	-1.155	-0.007	TRUE	-1.086	0.057	TRUE	-0.996	-0.152	TRUE
367	AR	-0.405	0.089	FALSE	-0.298	0.009	FALSE	-0.261	0.01	FALSE	-0.172	-0.074	FALSE	-0.097	-0.16	FALSE
369	ARAF	-0.328	0.077	FALSE	-0.268	0.07	FALSE	-0.183	0.027	FALSE	-0.133	0.053	FALSE	-0.065	0.159	FALSE
116985	ARAP1	-0.215	-0.023	FALSE	-0.179	-0.018	FALSE	-0.143	-0.012	FALSE	-0.101	-0.031	FALSE	-0.038	0.034	FALSE
116984	ARAP2	-0.325	-0.043	FALSE	-0.269	-0.042	FALSE	-0.237	0.027	FALSE	-0.173	0.012	FALSE	-0.078	-0.148	FALSE
64411	ARAP3	-0.351	-0.18	FALSE	-0.298	-0.126	FALSE	-0.247	-0.121	FALSE	-0.181	-0.12	FALSE	-0.119	-0.132	FALSE
23237	ARC	-0.174	-0.235	FALSE	-0.117	-0.254	FALSE	-0.085	-0.3	FALSE	-0.045	-0.362	FALSE	-0.01	-0.493	FALSE
372	ARCN1	-1.891	0.085	TRUE	-1.76	0.153	TRUE	-1.656	0.217	TRUE	-1.538	0.313	TRUE	-1.384	-0.072	TRUE
374	AREG	-0.21	-0.073	FALSE	-0.156	-0.056	FALSE	-0.119	-0.106	FALSE	-0.072	-0.073	FALSE	-0.025	-0.298	FALSE
9870	AREL1	-0.624	0.075	TRUE	-0.552	0.089	TRUE	-0.473	0.067	TRUE	-0.419	0.059	TRUE	-0.326	0.146	TRUE
375	ARF1	-0.762	0.025	TRUE	-0.702	0.055	TRUE	-0.575	0.057	TRUE	-0.483	0.08	TRUE	-0.35	0.065	TRUE
377	ARF3	-0.425	0.03	TRUE	-0.327	0.003	TRUE	-0.295	-0.004	TRUE	-0.234	-0.04	TRUE	-0.165	0.039	TRUE
378	ARF4	-1.269	0.4	TRUE	-1.09	0.491	TRUE	-0.895	0.565	TRUE	-0.682	0.671	TRUE	-0.39	0.893	TRUE
381	ARF5	-0.326	0.079	FALSE	-0.239	-0.048	FALSE	-0.206	-0.033	FALSE	-0.153	-0.016	FALSE	-0.085	0.037	FALSE
382	ARF6	-0.413	0.159	FALSE	-0.346	0.12	FALSE	-0.281	0.146	FALSE	-0.219	0.144	FALSE	-0.142	0.207	FALSE
55738	ARFGAP1	-0.492	0.098	TRUE	-0.439	0.123	TRUE	-0.365	0.128	TRUE	-0.306	0.13	TRUE	-0.208	0.214	TRUE
84364	ARFGAP2	-0.38	-0.091	FALSE	-0.331	-0.068	FALSE	-0.253	-0.103	FALSE	-0.213	-0.125	FALSE	-0.105	-0.356	FALSE
26286	ARFGAP3	-0.38	0.06	FALSE	-0.32	0.131	FALSE	-0.243	0.119	FALSE	-0.178	0.192	FALSE	-0.092	0.34	FALSE
10565	ARFGEF1	-0.356	0.124	FALSE	-0.295	0.098	FALSE	-0.233	0.137	FALSE	-0.186	0.165	FALSE	-0.095	0.052	FALSE
57221	ARFGEF3	-0.208	-0.045	FALSE	-0.149	-0.09	FALSE	-0.084	-0.138	FALSE	-0.043	-0.201	FALSE	-0.021	-0.3	FALSE
27236	ARFIP1	-0.643	0.199	TRUE	-0.444	0.107	TRUE	-0.37	0.165	TRUE	-0.326	0.137	TRUE	-0.211	0.303	TRUE
23647	ARFIP2	-0.388	0.129	FALSE	-0.28	0.056	FALSE	-0.226	0.068	FALSE	-0.172	0.138	FALSE	-0.083	-0.068	FALSE
10139	ARFRP1	-0.705	-0.023	TRUE	-0.623	-0.042	TRUE	-0.572	-0.045	TRUE	-0.473	-0.044	TRUE	-0.378	-0.048	TRUE
383	ARG1	-0.308	-0.113	FALSE	-0.249	-0.107	FALSE	-0.219	-0.1	FALSE	-0.165	-0.128	FALSE	-0.095	-0.117	FALSE
384	ARG2	-0.27	-0.128	FALSE	-0.233	-0.079	FALSE	-0.171	-0.168	FALSE	-0.13	-0.131	FALSE	-0.084	0.018	FALSE
503582	ARGFX	-0.442	0.029	TRUE	-0.401	0.028	TRUE	-0.37	0.098	TRUE	-0.336	0.187	TRUE	-0.281	0.492	TRUE
55082	ARGLU1	-0.823	-0.007	TRUE	-0.763	-0.019	TRUE	-0.674	-0.053	TRUE	-0.606	-0.094	TRUE	-0.483	-0.185	TRUE
392	ARHGAP1	-0.306	0.125	FALSE	-0.261	0.104	FALSE	-0.208	0.047	FALSE	-0.16	0.037	FALSE	-0.074	-0.023	FALSE
79658	ARHGAP10	-0.452	0.151	TRUE	-0.393	0.17	TRUE	-0.348	0.236	TRUE	-0.293	0.267	TRUE	-0.191	0.353	TRUE
9824	ARHGAP11A	-0.366	-0.126	FALSE	-0.309	-0.153	FALSE	-0.282	-0.114	FALSE	-0.241	-0.079	FALSE	-0.16	-0.067	FALSE
89839	ARHGAP11B	-0.375	-0.197	FALSE	-0.298	-0.213	FALSE	-0.257	-0.26	FALSE	-0.221	-0.279	FALSE	-0.163	-0.367	FALSE
94134	ARHGAP12	-0.389	0.029	FALSE	-0.321	0.06	FALSE	-0.196	0	FALSE	-0.16	0.057	FALSE	-0.086	0.064	FALSE
55843	ARHGAP15	-0.181	0.217	FALSE	-0.15	0.181	FALSE	-0.099	0.208	FALSE	-0.066	0.313	FALSE	0.016	0.452	FALSE
55114	ARHGAP17	-0.299	-0.07	FALSE	-0.273	-0.026	FALSE	-0.23	0.009	FALSE	-0.178	0.02	FALSE	-0.101	-0.035	FALSE
93663	ARHGAP18	-0.388	0.074	FALSE	-0.307	0.091	FALSE	-0.258	0.08	FALSE	-0.199	0.059	FALSE	-0.118	0.088	FALSE
84986	ARHGAP19	-0.563	0.137	TRUE	-0.442	0.105	TRUE	-0.387	0.142	TRUE	-0.313	0.081	TRUE	-0.206	0.062	TRUE
57569	ARHGAP20	-0.182	-0.102	FALSE	-0.147	-0.119	FALSE	-0.107	-0.157	FALSE	-0.046	-0.157	FALSE	-0.002	-0.136	FALSE
57584	ARHGAP21	-0.334	0.016	FALSE	-0.298	0.053	FALSE	-0.249	0.087	FALSE	-0.197	0.098	FALSE	-0.128	0.119	FALSE
58504	ARHGAP22	-0.46	0.224	TRUE	-0.424	0.24	TRUE	-0.34	0.199	TRUE	-0.252	0.197	TRUE	-0.163	0.236	TRUE
57636	ARHGAP23	-0.282	-0.242	FALSE	-0.26	-0.193	FALSE	-0.229	-0.147	FALSE	-0.194	-0.116	FALSE	-0.134	-0.144	FALSE
83478	ARHGAP24	-0.239	-0.027	FALSE	-0.19	-0.118	FALSE	-0.168	-0.126	FALSE	-0.127	-0.198	FALSE	-0.073	-0.182	FALSE
9938	ARHGAP25	-0.375	0.023	FALSE	-0.332	0.121	FALSE	-0.257	0.131	FALSE	-0.176	0.089	FALSE	-0.096	0.053	FALSE
23092	ARHGAP26	-0.237	-0.094	FALSE	-0.192	-0.053	FALSE	-0.143	0.021	FALSE	-0.095	0.02	FALSE	-0.027	0.098	FALSE
201176	ARHGAP27	-0.5	0.236	TRUE	-0.402	0.299	TRUE	-0.339	0.358	TRUE	-0.222	0.328	TRUE	-0.12	0.436	TRUE
79822	ARHGAP28	-0.407	0.009	FALSE	-0.366	0.046	FALSE	-0.278	0.022	FALSE	-0.228	0.079	FALSE	-0.13	0.063	FALSE
9411	ARHGAP29	-0.717	0.121	TRUE	-0.531	0.089	TRUE	-0.425	0.063	TRUE	-0.336	0.047	TRUE	-0.228	0.159	TRUE
257106	ARHGAP30	-0.324	-0.212	FALSE	-0.277	-0.192	FALSE	-0.199	-0.254	FALSE	-0.14	-0.33	FALSE	-0.073	-0.443	FALSE
57514	ARHGAP31	-0.376	0.068	FALSE	-0.337	0.06	FALSE	-0.285	0.068	FALSE	-0.236	0.021	FALSE	-0.147	0.042	FALSE
9743	ARHGAP32	-0.388	0.323	FALSE	-0.333	0.362	FALSE	-0.256	0.412	FALSE	-0.187	0.457	FALSE	-0.085	0.636	FALSE
115703	ARHGAP33	-0.273	0.021	FALSE	-0.249	0.042	FALSE	-0.213	0.069	FALSE	-0.153	0.081	FALSE	-0.077	0.066	FALSE
2909	ARHGAP35	-0.373	0.28	FALSE	-0.319	0.272	FALSE	-0.232	0.088	FALSE	-0.176	0.139	FALSE	-0.098	0.111	FALSE
158763	ARHGAP36	-0.506	0.062	TRUE	-0.414	0.07	TRUE	-0.322	0.113	TRUE	-0.238	0.09	TRUE	-0.157	0.243	TRUE
80728	ARHGAP39	-0.298	-0.163	FALSE	-0.262	-0.101	FALSE	-0.223	-0.115	FALSE	-0.177	-0.112	FALSE	-0.115	-0.034	FALSE
393	ARHGAP4	-0.553	0.251	TRUE	-0.451	0.209	TRUE	-0.395	0.328	TRUE	-0.323	0.391	TRUE	-0.194	0.384	TRUE
9912	ARHGAP44	-0.176	0.085	FALSE	-0.13	0.125	FALSE	-0.085	0.176	FALSE	-0.038	0.174	FALSE	0.034	0.19	FALSE
23526	ARHGAP45	-0.517	0.042	TRUE	-0.448	0.082	TRUE	-0.365	0.083	TRUE	-0.305	0.074	TRUE	-0.195	0.059	TRUE
394	ARHGAP5	-0.541	0.048	TRUE	-0.42	0.009	TRUE	-0.345	-0.053	TRUE	-0.293	-0.066	TRUE	-0.204	-0.064	TRUE
395	ARHGAP6	-0.316	0.028	FALSE	-0.25	0.104	FALSE	-0.169	0.093	FALSE	-0.111	0.129	FALSE	-0.024	0.151	FALSE
23779	ARHGAP8	-0.357	0.266	FALSE	-0.315	0.362	FALSE	-0.245	0.399	FALSE	-0.182	0.391	FALSE	-0.074	0.409	FALSE
64333	ARHGAP9	-0.73	0.089	TRUE	-0.601	0.113	TRUE	-0.515	0.066	TRUE	-0.432	0.062	TRUE	-0.297	0.05	TRUE
396	ARHGDIA	-0.248	0.022	FALSE	-0.228	0.102	FALSE	-0.199	0.193	FALSE	-0.14	0.209	FALSE	-0.071	0.284	FALSE
397	ARHGDIB	-0.262	-0.006	FALSE	-0.177	0.011	FALSE	-0.108	-0.028	FALSE	-0.072	0.02	FALSE	-0.006	-0.11	FALSE
398	ARHGDIG	-0.503	0.174	TRUE	-0.471	0.251	TRUE	-0.388	0.255	TRUE	-0.318	0.305	TRUE	-0.186	0.242	TRUE
9138	ARHGEF1	-0.23	0.193	FALSE	-0.169	0.176	FALSE	-0.118	0.195	FALSE	-0.055	0.194	FALSE	0.009	0.283	FALSE
9639	ARHGEF10	-0.303	0.231	FALSE	-0.17	0.146	FALSE	-0.118	0.155	FALSE	-0.086	0.176	FALSE	-0.018	0.257	FALSE
55160	ARHGEF10L	-0.348	0.01	FALSE	-0.271	0.025	FALSE	-0.216	0.03	FALSE	-0.148	0.012	FALSE	-0.071	-0.051	FALSE
9826	ARHGEF11	-0.292	-0.082	FALSE	-0.228	-0.07	FALSE	-0.18	-0.059	FALSE	-0.137	-0.125	FALSE	-0.076	-0.093	FALSE
23365	ARHGEF12	-0.301	0.144	FALSE	-0.222	0.138	FALSE	-0.174	0.226	FALSE	-0.099	0.2	FALSE	-0.014	0.208	FALSE
22899	ARHGEF15	-0.273	0.276	FALSE	-0.231	0.312	FALSE	-0.19	0.341	FALSE	-0.114	0.363	FALSE	-0.034	0.475	FALSE
27237	ARHGEF16	-0.292	-0.089	FALSE	-0.267	0.008	FALSE	-0.218	0.005	FALSE	-0.172	0.024	FALSE	-0.093	0.004	FALSE
23370	ARHGEF18	-0.351	0.189	FALSE	-0.284	0.216	FALSE	-0.213	0.255	FALSE	-0.16	0.262	FALSE	-0.088	0.439	FALSE
128272	ARHGEF19	-0.264	0.252	FALSE	-0.229	0.142	FALSE	-0.194	0.183	FALSE	-0.135	0.212	FALSE	-0.033	0.262	FALSE
9181	ARHGEF2	-0.558	-0.079	TRUE	-0.503	-0.055	TRUE	-0.454	-0.041	TRUE	-0.41	0.012	TRUE	-0.325	0.051	TRUE
115557	ARHGEF25	-0.285	0.019	FALSE	-0.205	-0.055	FALSE	-0.17	-0.089	FALSE	-0.123	-0.052	FALSE	-0.06	-0.089	FALSE
26084	ARHGEF26	-0.288	0.239	FALSE	-0.221	0.282	FALSE	-0.119	0.319	FALSE	-0.061	0.37	FALSE	0.021	0.484	FALSE
64283	ARHGEF28	-0.331	-0.129	FALSE	-0.285	-0.088	FALSE	-0.239	-0.148	FALSE	-0.194	-0.138	FALSE	-0.124	-0.197	FALSE
50650	ARHGEF3	-0.216	-0.033	FALSE	-0.178	-0.049	FALSE	-0.138	-0.018	FALSE	-0.092	0.019	FALSE	-0.033	0.111	FALSE
100271715	ARHGEF33	-0.554	-0.152	TRUE	-0.489	-0.149	TRUE	-0.424	-0.143	TRUE	-0.356	-0.109	TRUE	-0.276	0.042	TRUE
445328	ARHGEF35	-0.23	0.151	FALSE	-0.176	0.204	FALSE	-0.107	0.275	FALSE	-0.038	0.289	FALSE	0.022	0.44	FALSE
389337	ARHGEF37	-0.194	-0.069	FALSE	-0.149	-0.052	FALSE	-0.12	-0.028	FALSE	-0.059	-0.033	FALSE	-0.009	-0.025	FALSE
54848	ARHGEF38	-0.227	0.05	FALSE	-0.175	0.015	FALSE	-0.129	0.046	FALSE	-0.061	-0.054	FALSE	-0.014	-0.145	FALSE
84904	ARHGEF39	-0.359	0.175	FALSE	-0.307	0.289	FALSE	-0.235	0.338	FALSE	-0.162	0.39	FALSE	-0.052	0.456	FALSE
50649	ARHGEF4	-0.358	0.004	FALSE	-0.27	-0.042	FALSE	-0.224	-0.017	FALSE	-0.18	0.02	FALSE	-0.11	0.099	FALSE
55701	ARHGEF40	-0.373	-0.154	FALSE	-0.331	-0.139	FALSE	-0.275	-0.146	FALSE	-0.227	-0.172	FALSE	-0.118	-0.413	FALSE
7984	ARHGEF5	-0.357	-0.162	FALSE	-0.288	-0.151	FALSE	-0.252	-0.16	FALSE	-0.199	-0.167	FALSE	-0.105	-0.287	FALSE
9459	ARHGEF6	-0.177	0.139	FALSE	-0.135	0.082	FALSE	-0.112	0.125	FALSE	-0.069	0.159	FALSE	-0.007	0.247	FALSE
8874	ARHGEF7	-0.539	-0.034	TRUE	-0.46	0.001	TRUE	-0.383	0.013	TRUE	-0.322	0.029	TRUE	-0.232	0.16	TRUE
23229	ARHGEF9	-0.279	0.238	FALSE	-0.193	0.263	FALSE	-0.143	0.223	FALSE	-0.096	0.221	FALSE	-0.019	0.259	FALSE
8289	ARID1A	-0.776	0.574	TRUE	-0.644	0.628	TRUE	-0.604	0.667	TRUE	-0.462	0.593	TRUE	-0.297	0.839	TRUE
57492	ARID1B	-0.942	0.289	TRUE	-0.761	0.337	TRUE	-0.442	0.22	TRUE	-0.301	0.166	TRUE	-0.173	0.148	TRUE
196528	ARID2	-0.676	0.202	TRUE	-0.549	0.207	TRUE	-0.439	0.147	TRUE	-0.37	0.136	TRUE	-0.268	0.142	TRUE
1820	ARID3A	-0.428	-0.126	TRUE	-0.365	-0.09	TRUE	-0.306	-0.163	TRUE	-0.241	-0.195	TRUE	-0.175	-0.161	TRUE
10620	ARID3B	-0.556	0.086	TRUE	-0.506	0.055	TRUE	-0.432	0.023	TRUE	-0.377	0.03	TRUE	-0.274	0.086	TRUE
138715	ARID3C	-0.286	-0.14	FALSE	-0.247	-0.141	FALSE	-0.2	-0.229	FALSE	-0.157	-0.258	FALSE	-0.103	-0.277	FALSE
5926	ARID4A	-0.46	-0.005	TRUE	-0.385	0.016	TRUE	-0.302	0.029	TRUE	-0.25	0.036	TRUE	-0.152	-0.069	TRUE
51742	ARID4B	-0.489	0.057	TRUE	-0.426	0.086	TRUE	-0.331	0.002	TRUE	-0.283	-0.028	TRUE	-0.195	0.042	TRUE
10865	ARID5A	-0.337	-0.013	FALSE	-0.287	-0.071	FALSE	-0.225	-0.099	FALSE	-0.174	-0.165	FALSE	-0.103	-0.177	FALSE
84159	ARID5B	-0.516	-0.085	TRUE	-0.417	-0.097	TRUE	-0.365	-0.094	TRUE	-0.298	-0.078	TRUE	-0.193	-0.051	TRUE
25820	ARIH1	-1.255	-0.039	TRUE	-1.153	0.012	TRUE	-1.018	-0.016	TRUE	-0.901	-0.066	TRUE	-0.779	-0.14	TRUE
10425	ARIH2	-0.251	0.204	FALSE	-0.197	0.239	FALSE	-0.158	0.269	FALSE	-0.107	0.353	FALSE	-0.026	0.446	FALSE
400	ARL1	-0.239	0.085	FALSE	-0.173	0.125	FALSE	-0.123	0.196	FALSE	-0.067	0.19	FALSE	0.017	0.208	FALSE
285598	ARL10	-0.376	0.014	FALSE	-0.307	-0.078	FALSE	-0.262	-0.061	FALSE	-0.2	-0.111	FALSE	-0.114	-0.286	FALSE
115761	ARL11	-0.728	0.103	TRUE	-0.651	0.121	TRUE	-0.576	0.146	TRUE	-0.497	0.247	TRUE	-0.37	0.579	TRUE
392509	ARL13A	-0.256	-0.111	FALSE	-0.196	-0.149	FALSE	-0.165	-0.148	FALSE	-0.122	-0.147	FALSE	-0.054	-0.161	FALSE
200894	ARL13B	-0.415	0.167	FALSE	-0.326	0.166	FALSE	-0.244	0.181	FALSE	-0.192	0.18	FALSE	-0.109	0.332	FALSE
80117	ARL14	-0.29	0.063	FALSE	-0.212	0.046	FALSE	-0.155	0.085	FALSE	-0.107	0.12	FALSE	-0.021	0.27	FALSE
120534	ARL14EP	-0.329	-0.049	FALSE	-0.244	-0.049	FALSE	-0.203	-0.096	FALSE	-0.135	-0.265	FALSE	-0.04	-0.5	FALSE
54622	ARL15	-0.234	-0.024	FALSE	-0.197	-0.042	FALSE	-0.142	-0.046	FALSE	-0.105	0.048	FALSE	-0.036	0.069	FALSE
339231	ARL16	-0.362	-0.169	FALSE	-0.308	-0.165	FALSE	-0.24	-0.173	FALSE	-0.187	-0.232	FALSE	-0.102	-0.342	FALSE
51326	ARL17A	-0.273	-0.194	FALSE	-0.237	-0.134	FALSE	-0.189	-0.168	FALSE	-0.148	-0.229	FALSE	-0.078	-0.272	FALSE
402	ARL2	-0.661	-0.167	TRUE	-0.586	-0.223	TRUE	-0.544	-0.222	TRUE	-0.479	-0.28	TRUE	-0.395	-0.327	TRUE
23568	ARL2BP	-0.451	-0.198	TRUE	-0.412	-0.187	TRUE	-0.347	-0.161	TRUE	-0.27	-0.138	TRUE	-0.172	-0.011	TRUE
403	ARL3	-0.185	-0.156	FALSE	-0.14	-0.122	FALSE	-0.107	-0.1	FALSE	-0.059	-0.114	FALSE	-0.004	-0.079	FALSE
10124	ARL4A	-0.297	0.092	FALSE	-0.191	0.094	FALSE	-0.14	0.012	FALSE	-0.098	0.059	FALSE	-0.018	-0.015	FALSE
10123	ARL4C	-0.497	0.107	TRUE	-0.448	0.041	TRUE	-0.398	0.122	TRUE	-0.351	0.04	TRUE	-0.239	0.02	TRUE
379	ARL4D	-0.502	0.078	TRUE	-0.403	0.093	TRUE	-0.336	0.098	TRUE	-0.269	0.143	TRUE	-0.176	0.157	TRUE
26225	ARL5A	-0.328	-0.185	FALSE	-0.26	-0.196	FALSE	-0.208	-0.196	FALSE	-0.16	-0.216	FALSE	-0.091	-0.282	FALSE
221079	ARL5B	-0.605	0.185	TRUE	-0.532	0.166	TRUE	-0.451	0.178	TRUE	-0.362	0.184	TRUE	-0.246	0.174	TRUE
390790	ARL5C	-0.458	-0.12	TRUE	-0.335	-0.212	TRUE	-0.278	-0.241	TRUE	-0.234	-0.28	TRUE	-0.167	-0.258	TRUE
84100	ARL6	-0.32	-0.028	FALSE	-0.25	-0.008	FALSE	-0.192	-0.002	FALSE	-0.14	0.019	FALSE	-0.064	0.054	FALSE
23204	ARL6IP1	-0.126	-0.141	FALSE	-0.088	-0.175	FALSE	-0.055	-0.225	FALSE	-0.039	-0.179	FALSE	-0.02	-0.179	FALSE
51329	ARL6IP4	-0.599	-0.019	TRUE	-0.502	-0.018	TRUE	-0.457	-0.032	TRUE	-0.366	-0.003	TRUE	-0.238	0.151	TRUE
10550	ARL6IP5	-0.185	0.037	FALSE	-0.165	0.051	FALSE	-0.127	0.099	FALSE	-0.089	0.184	FALSE	-0.043	0.469	FALSE
127829	ARL8A	-0.322	0.158	FALSE	-0.261	0.122	FALSE	-0.214	0.135	FALSE	-0.147	0.093	FALSE	-0.08	0.03	FALSE
55207	ARL8B	-0.381	-0.077	FALSE	-0.335	-0.063	FALSE	-0.305	-0.016	FALSE	-0.243	-0.048	FALSE	-0.169	0.026	FALSE
132946	ARL9	-0.335	0.113	FALSE	-0.26	0.187	FALSE	-0.182	0.113	FALSE	-0.137	0.109	FALSE	-0.051	0.043	FALSE
55156	ARMC1	-0.439	0.201	TRUE	-0.253	0.177	TRUE	-0.172	0.111	TRUE	-0.112	0.076	TRUE	-0.043	0.055	TRUE
83787	ARMC10	-0.386	0.006	FALSE	-0.323	0.009	FALSE	-0.233	-0.07	FALSE	-0.179	-0.136	FALSE	-0.096	-0.469	FALSE
84071	ARMC2	-0.361	-0.027	FALSE	-0.302	-0.126	FALSE	-0.244	-0.15	FALSE	-0.181	-0.183	FALSE	-0.066	-0.487	FALSE
219681	ARMC3	-0.22	-0.101	FALSE	-0.154	-0.099	FALSE	-0.103	-0.094	FALSE	-0.053	-0.145	FALSE	-0.006	-0.199	FALSE
55130	ARMC4	-0.219	-0.23	FALSE	-0.162	-0.223	FALSE	-0.13	-0.237	FALSE	-0.091	-0.314	FALSE	-0.035	-0.477	FALSE
79798	ARMC5	-0.488	0.085	TRUE	-0.447	0.079	TRUE	-0.387	0.058	TRUE	-0.314	0.071	TRUE	-0.193	-0.074	TRUE
93436	ARMC6	-0.305	-0.153	FALSE	-0.29	-0.193	FALSE	-0.253	-0.169	FALSE	-0.214	-0.151	FALSE	-0.153	-0.114	FALSE
79637	ARMC7	-0.742	-0.082	TRUE	-0.693	-0.061	TRUE	-0.652	-0.039	TRUE	-0.568	-0.05	TRUE	-0.411	-0.174	TRUE
25852	ARMC8	-0.401	0.102	FALSE	-0.321	0.111	FALSE	-0.286	0.147	FALSE	-0.205	0.131	FALSE	-0.108	0.108	FALSE
51309	ARMCX1	-0.147	0.025	FALSE	-0.072	-0.052	FALSE	-0.046	0.009	FALSE	-0.025	0.052	FALSE	-0.006	0.106	FALSE
9823	ARMCX2	-0.415	-0.039	FALSE	-0.318	-0.032	FALSE	-0.266	-0.018	FALSE	-0.198	-0.024	FALSE	-0.07	-0.463	FALSE
51566	ARMCX3	-0.248	-0.353	FALSE	-0.231	-0.32	FALSE	-0.186	-0.328	FALSE	-0.147	-0.341	FALSE	-0.074	-0.409	FALSE
64860	ARMCX5	-0.199	-0.15	FALSE	-0.137	-0.176	FALSE	-0.094	-0.24	FALSE	-0.058	-0.288	FALSE	-0.029	-0.414	FALSE
54470	ARMCX6	-0.347	0.333	FALSE	-0.18	0.324	FALSE	-0.133	0.422	FALSE	-0.088	0.505	FALSE	-0.052	0.686	FALSE
339541	ARMH1	-0.515	-0.041	TRUE	-0.437	-0.036	TRUE	-0.362	-0.032	TRUE	-0.281	-0.058	TRUE	-0.19	-0.169	TRUE
79591	ARMH3	-0.609	-0.141	TRUE	-0.536	-0.115	TRUE	-0.462	-0.081	TRUE	-0.384	-0.016	TRUE	-0.276	0.202	TRUE
145407	ARMH4	-0.684	-0.083	TRUE	-0.573	-0.029	TRUE	-0.38	-0.109	TRUE	-0.081	-0.646	TRUE	-0.043	-0.733	TRUE
405	ARNT	-0.609	0.569	TRUE	-0.505	0.671	TRUE	-0.323	0.719	TRUE	-0.203	0.77	TRUE	-0.085	1.046	TRUE
9915	ARNT2	-0.331	0.052	FALSE	-0.285	0.131	FALSE	-0.227	0.198	FALSE	-0.169	0.174	FALSE	-0.088	0.193	FALSE
406	ARNTL	-0.378	-0.116	FALSE	-0.304	-0.155	FALSE	-0.273	-0.16	FALSE	-0.224	-0.142	FALSE	-0.142	-0.107	FALSE
56938	ARNTL2	-0.33	-0.027	FALSE	-0.28	-0.024	FALSE	-0.239	-0.022	FALSE	-0.17	-0.032	FALSE	-0.098	-0.018	FALSE
10552	ARPC1A	-0.712	0.07	TRUE	-0.659	0.12	TRUE	-0.571	0.065	TRUE	-0.469	-0.029	TRUE	-0.387	0.021	TRUE
10095	ARPC1B	-0.43	0.259	TRUE	-0.327	0.229	TRUE	-0.271	0.192	TRUE	-0.193	0.251	TRUE	-0.104	0.289	TRUE
10109	ARPC2	-0.69	-0.057	TRUE	-0.618	-0.044	TRUE	-0.558	-0.012	TRUE	-0.496	0.018	TRUE	-0.374	0.058	TRUE
10094	ARPC3	-0.47	-0.013	TRUE	-0.429	-0.049	TRUE	-0.405	-0.009	TRUE	-0.364	0.068	TRUE	-0.286	0.061	TRUE
10093	ARPC4	-0.816	-0.001	TRUE	-0.647	-0.066	TRUE	-0.579	-0.066	TRUE	-0.509	-0.05	TRUE	-0.404	-0.048	TRUE
10092	ARPC5	-0.359	0.068	FALSE	-0.318	0.059	FALSE	-0.268	0.042	FALSE	-0.196	0.07	FALSE	-0.115	-0.076	FALSE
81873	ARPC5L	-0.274	-0.179	FALSE	-0.211	-0.174	FALSE	-0.161	-0.216	FALSE	-0.098	-0.346	FALSE	-0.053	-0.553	FALSE
348110	ARPIN	-0.143	0.221	FALSE	-0.087	0.243	FALSE	-0.059	0.279	FALSE	-0.027	0.343	FALSE	-0.01	0.195	FALSE
10776	ARPP19	-0.377	-0.191	FALSE	-0.308	-0.187	FALSE	-0.252	-0.215	FALSE	-0.194	-0.335	FALSE	-0.138	-0.417	FALSE
10777	ARPP21	-0.405	-0.051	FALSE	-0.301	-0.054	FALSE	-0.259	-0.06	FALSE	-0.198	-0.09	FALSE	-0.112	-0.081	FALSE
407	ARR3	-0.288	-0.056	FALSE	-0.221	-0.078	FALSE	-0.182	-0.045	FALSE	-0.116	-0.153	FALSE	-0.048	-0.423	FALSE
408	ARRB1	-0.255	-0.035	FALSE	-0.204	-0.093	FALSE	-0.174	-0.09	FALSE	-0.128	-0.155	FALSE	-0.067	-0.23	FALSE
409	ARRB2	-0.215	-0.192	FALSE	-0.184	-0.225	FALSE	-0.125	-0.277	FALSE	-0.091	-0.369	FALSE	-0.042	-0.453	FALSE
92714	ARRDC1	-0.289	-0.206	FALSE	-0.256	-0.217	FALSE	-0.218	-0.223	FALSE	-0.164	-0.357	FALSE	-0.106	-0.471	FALSE
27106	ARRDC2	-0.373	-0.204	FALSE	-0.349	-0.197	FALSE	-0.281	-0.209	FALSE	-0.205	-0.303	FALSE	-0.119	-0.396	FALSE
91947	ARRDC4	-0.348	0.292	FALSE	-0.265	0.274	FALSE	-0.211	0.283	FALSE	-0.145	0.383	FALSE	-0.047	0.238	FALSE
410	ARSA	-0.381	-0.123	FALSE	-0.325	-0.127	FALSE	-0.259	-0.175	FALSE	-0.201	-0.179	FALSE	-0.14	-0.236	FALSE
411	ARSB	-0.286	0.142	FALSE	-0.222	0.172	FALSE	-0.171	0.19	FALSE	-0.134	0.24	FALSE	-0.085	0.345	FALSE
414	ARSD	-0.3	0.054	FALSE	-0.229	0.049	FALSE	-0.184	0.135	FALSE	-0.11	0.006	FALSE	-0.053	0.018	FALSE
415	ARSE	-0.23	-0.113	FALSE	-0.188	-0.066	FALSE	-0.147	-0.041	FALSE	-0.079	-0.124	FALSE	-0.019	-0.185	FALSE
416	ARSF	-0.3	0.03	FALSE	-0.226	0.012	FALSE	-0.177	0.005	FALSE	-0.126	0.045	FALSE	-0.057	-0.122	FALSE
22901	ARSG	-0.342	0.041	FALSE	-0.218	0.045	FALSE	-0.193	0.101	FALSE	-0.143	0.204	FALSE	-0.061	0.277	FALSE
347527	ARSH	-0.131	-0.072	FALSE	-0.102	-0.076	FALSE	-0.063	-0.116	FALSE	-0.034	-0.134	FALSE	-0.007	-0.34	FALSE
340075	ARSI	-0.245	-0.056	FALSE	-0.214	-0.039	FALSE	-0.185	-0.112	FALSE	-0.155	-0.187	FALSE	-0.104	-0.411	FALSE
79642	ARSJ	-0.302	-0.017	FALSE	-0.263	-0.011	FALSE	-0.202	0.01	FALSE	-0.135	0.03	FALSE	-0.036	-0.196	FALSE
153642	ARSK	-0.648	-0.154	TRUE	-0.599	-0.072	TRUE	-0.525	-0.007	TRUE	-0.468	0.127	TRUE	-0.329	0.509	TRUE
417	ART1	-0.305	0.342	FALSE	-0.196	0.34	FALSE	-0.129	0.355	FALSE	-0.089	0.393	FALSE	-0.041	0.618	FALSE
419	ART3	-0.262	0.05	FALSE	-0.227	0.102	FALSE	-0.172	0.123	FALSE	-0.119	0.071	FALSE	-0.044	0.084	FALSE
420	ART4	-0.222	0.172	FALSE	-0.152	0.102	FALSE	-0.126	0.1	FALSE	-0.08	0.179	FALSE	-0.033	0.304	FALSE
116969	ART5	-0.391	-0.008	FALSE	-0.32	-0.019	FALSE	-0.258	-0.088	FALSE	-0.198	-0.123	FALSE	-0.128	-0.129	FALSE
64801	ARV1	-0.272	0.027	FALSE	-0.21	0.031	FALSE	-0.175	0.066	FALSE	-0.137	0.068	FALSE	-0.079	0.173	FALSE
421	ARVCF	-0.415	0.035	FALSE	-0.383	0.063	FALSE	-0.323	0.074	FALSE	-0.245	0.028	FALSE	-0.141	-0.028	FALSE
170302	ARX	-0.278	-0.084	FALSE	-0.218	-0.077	FALSE	-0.189	-0.09	FALSE	-0.152	-0.071	FALSE	-0.086	-0.003	FALSE
57412	AS3MT	-0.238	0.143	FALSE	-0.181	0.172	FALSE	-0.111	0.208	FALSE	-0.061	0.179	FALSE	-0.021	0.334	FALSE
56624	ASAH2	-0.196	0.119	FALSE	-0.161	0.144	FALSE	-0.118	0.199	FALSE	-0.06	0.226	FALSE	0.001	0.348	FALSE
50807	ASAP1	-0.326	0.023	FALSE	-0.241	-0.021	FALSE	-0.185	-0.032	FALSE	-0.134	-0.036	FALSE	-0.058	-0.021	FALSE
8853	ASAP2	-0.332	0.194	FALSE	-0.214	0.118	FALSE	-0.154	0.017	FALSE	-0.093	0.097	FALSE	-0.018	0.129	FALSE
55616	ASAP3	-0.392	-0.028	FALSE	-0.285	-0.065	FALSE	-0.228	-0.058	FALSE	-0.195	-0.044	FALSE	-0.107	-0.151	FALSE
51665	ASB1	-0.421	-0.204	FALSE	-0.334	-0.21	FALSE	-0.282	-0.183	FALSE	-0.236	-0.108	FALSE	-0.154	0.112	FALSE
136371	ASB10	-0.48	-0.068	TRUE	-0.374	-0.087	TRUE	-0.336	-0.074	TRUE	-0.275	-0.079	TRUE	-0.187	-0.005	TRUE
140456	ASB11	-0.366	0.275	FALSE	-0.317	0.3	FALSE	-0.255	0.255	FALSE	-0.179	0.314	FALSE	-0.08	0.264	FALSE
142689	ASB12	-0.422	-0.164	FALSE	-0.353	-0.127	FALSE	-0.274	-0.139	FALSE	-0.212	-0.173	FALSE	-0.131	-0.155	FALSE
79754	ASB13	-0.319	-0.047	FALSE	-0.269	-0.013	FALSE	-0.199	-0.012	FALSE	-0.146	-0.017	FALSE	-0.08	-0.043	FALSE
142686	ASB14	-0.333	-0.086	FALSE	-0.267	-0.06	FALSE	-0.202	-0.063	FALSE	-0.172	-0.051	FALSE	-0.09	-0.094	FALSE
142685	ASB15	-0.426	-0.076	TRUE	-0.357	-0.076	TRUE	-0.307	-0.065	TRUE	-0.261	0.007	TRUE	-0.18	0.181	TRUE
92591	ASB16	-0.391	-0.118	FALSE	-0.329	-0.182	FALSE	-0.296	-0.148	FALSE	-0.254	-0.226	FALSE	-0.18	-0.222	FALSE
127247	ASB17	-0.214	0.178	FALSE	-0.147	0.159	FALSE	-0.085	0.197	FALSE	-0.056	0.226	FALSE	-0.032	0.297	FALSE
401036	ASB18	-0.33	-0.09	FALSE	-0.268	-0.09	FALSE	-0.232	-0.058	FALSE	-0.171	-0.105	FALSE	-0.082	-0.218	FALSE
51130	ASB3	-0.197	0.28	FALSE	-0.165	0.385	FALSE	-0.101	0.426	FALSE	-0.054	0.367	FALSE	-0.022	0.391	FALSE
51666	ASB4	-0.34	0.005	FALSE	-0.304	0.034	FALSE	-0.25	0.042	FALSE	-0.194	0.035	FALSE	-0.098	0.029	FALSE
140458	ASB5	-0.177	-0.137	FALSE	-0.143	-0.104	FALSE	-0.089	-0.152	FALSE	-0.044	-0.278	FALSE	-0.016	-0.427	FALSE
140459	ASB6	-0.273	-0.068	FALSE	-0.237	0.004	FALSE	-0.203	0.023	FALSE	-0.179	0.118	FALSE	-0.135	0.144	FALSE
140460	ASB7	-0.293	0.198	FALSE	-0.235	0.109	FALSE	-0.191	0.055	FALSE	-0.128	0.05	FALSE	-0.068	0.119	FALSE
140461	ASB8	-0.148	0.082	FALSE	-0.123	0.16	FALSE	-0.104	0.163	FALSE	-0.088	0.295	FALSE	-0.059	0.472	FALSE
140462	ASB9	-0.281	-0.11	FALSE	-0.204	-0.103	FALSE	-0.163	-0.087	FALSE	-0.106	-0.121	FALSE	-0.052	-0.155	FALSE
51008	ASCC1	-0.342	0.075	FALSE	-0.237	0.044	FALSE	-0.192	-0.06	FALSE	-0.158	-0.158	FALSE	-0.088	-0.325	FALSE
84164	ASCC2	-0.445	0.026	TRUE	-0.369	0.035	TRUE	-0.292	0.032	TRUE	-0.209	0.034	TRUE	-0.137	0.041	TRUE
10973	ASCC3	-0.395	0.052	FALSE	-0.318	0.058	FALSE	-0.279	0.072	FALSE	-0.208	0.047	FALSE	-0.126	0.054	FALSE
429	ASCL1	-0.385	-0.017	FALSE	-0.329	0.028	FALSE	-0.236	-0.021	FALSE	-0.181	-0.01	FALSE	-0.102	-0.035	FALSE
430	ASCL2	-0.237	0.221	FALSE	-0.184	0.33	FALSE	-0.152	0.395	FALSE	-0.079	0.437	FALSE	0.019	0.569	FALSE
56676	ASCL3	-0.348	0.01	FALSE	-0.286	0.048	FALSE	-0.217	0.027	FALSE	-0.136	-0.035	FALSE	-0.067	0.074	FALSE
121549	ASCL4	-0.357	0.066	FALSE	-0.295	0.085	FALSE	-0.248	0.082	FALSE	-0.193	0.097	FALSE	-0.096	0.109	FALSE
25842	ASF1A	-0.498	-0.054	TRUE	-0.451	-0.034	TRUE	-0.404	-0.014	TRUE	-0.338	-0.041	TRUE	-0.236	-0.054	TRUE
55723	ASF1B	-0.559	-0.109	TRUE	-0.502	-0.091	TRUE	-0.437	-0.086	TRUE	-0.381	-0.052	TRUE	-0.273	-0.071	TRUE
432	ASGR1	-0.365	-0.006	FALSE	-0.33	0.056	FALSE	-0.288	0.039	FALSE	-0.239	0.032	FALSE	-0.163	0.024	FALSE
433	ASGR2	-0.52	-0.056	TRUE	-0.423	-0.062	TRUE	-0.392	-0.001	TRUE	-0.325	0.007	TRUE	-0.241	0.046	TRUE
55870	ASH1L	-0.599	0.117	TRUE	-0.502	0.114	TRUE	-0.419	0.094	TRUE	-0.317	0.016	TRUE	-0.185	-0.126	TRUE
9070	ASH2L	-1.23	0.227	TRUE	-1.133	0.31	TRUE	-0.98	0.203	TRUE	-0.891	0.23	TRUE	-0.69	0.265	TRUE
41	ASIC1	-0.53	-0.153	TRUE	-0.412	-0.202	TRUE	-0.346	-0.207	TRUE	-0.281	-0.17	TRUE	-0.19	-0.072	TRUE
40	ASIC2	-0.499	0.103	TRUE	-0.457	0.186	TRUE	-0.411	0.171	TRUE	-0.336	0.142	TRUE	-0.224	0.206	TRUE
51802	ASIC5	-0.366	-0.135	FALSE	-0.272	-0.176	FALSE	-0.217	-0.234	FALSE	-0.151	-0.266	FALSE	-0.039	-0.523	FALSE
434	ASIP	-0.201	0.036	FALSE	-0.167	-0.026	FALSE	-0.138	0.005	FALSE	-0.099	0.012	FALSE	-0.053	0.092	FALSE
435	ASL	-0.452	-0.08	TRUE	-0.386	-0.094	TRUE	-0.346	-0.07	TRUE	-0.296	-0.056	TRUE	-0.212	-0.05	TRUE
438	ASMT	-0.395	0.245	FALSE	-0.316	0.357	FALSE	-0.22	0.418	FALSE	-0.149	0.425	FALSE	-0.055	0.397	FALSE
8623	ASMTL	-0.369	-0.001	FALSE	-0.345	0.022	FALSE	-0.297	0.054	FALSE	-0.251	0.067	FALSE	-0.16	0.002	FALSE
439	ASNA1	-0.646	0.027	TRUE	-0.594	0.098	TRUE	-0.509	0.151	TRUE	-0.446	0.212	TRUE	-0.338	0.367	TRUE
440	ASNS	-0.749	0.12	TRUE	-0.628	0.137	TRUE	-0.48	0.128	TRUE	-0.351	0.103	TRUE	-0.204	0.052	TRUE
54529	ASNSD1	-0.407	0.185	FALSE	-0.346	0.28	FALSE	-0.276	0.31	FALSE	-0.213	0.385	FALSE	-0.11	0.232	FALSE
443	ASPA	-0.176	0.176	FALSE	-0.117	0.258	FALSE	-0.092	0.236	FALSE	-0.027	0.197	FALSE	0.021	0.369	FALSE
444	ASPH	-0.337	0.087	FALSE	-0.262	0.099	FALSE	-0.22	0.093	FALSE	-0.167	0.175	FALSE	-0.083	0.18	FALSE
253982	ASPHD1	-0.434	-0.316	TRUE	-0.381	-0.282	TRUE	-0.337	-0.242	TRUE	-0.271	-0.226	TRUE	-0.196	-0.054	TRUE
57168	ASPHD2	-0.279	-0.003	FALSE	-0.211	-0.003	FALSE	-0.167	-0.027	FALSE	-0.113	-0.033	FALSE	-0.052	-0.09	FALSE
259266	ASPM	-0.604	-0.171	TRUE	-0.512	-0.179	TRUE	-0.423	-0.18	TRUE	-0.362	-0.15	TRUE	-0.265	-0.093	TRUE
151516	ASPRV1	-0.531	0.026	TRUE	-0.408	0.065	TRUE	-0.357	0.083	TRUE	-0.296	0.038	TRUE	-0.167	-0.133	TRUE
80150	ASRGL1	-0.363	-0.066	FALSE	-0.293	-0.026	FALSE	-0.258	0.036	FALSE	-0.212	0.086	FALSE	-0.124	0.031	FALSE
445	ASS1	-0.54	0.159	TRUE	-0.453	0.133	TRUE	-0.378	0.149	TRUE	-0.315	0.226	TRUE	-0.205	0.255	TRUE
28990	ASTE1	-0.348	0.052	FALSE	-0.221	-0.035	FALSE	-0.166	-0.036	FALSE	-0.094	-0.144	FALSE	-0.036	-0.4	FALSE
431705	ASTL	-0.423	-0.262	FALSE	-0.377	-0.245	FALSE	-0.319	-0.23	FALSE	-0.268	-0.18	FALSE	-0.18	-0.034	FALSE
460	ASTN1	-0.299	0.111	FALSE	-0.215	0.103	FALSE	-0.165	0.011	FALSE	-0.103	-0.129	FALSE	-0.043	-0.517	FALSE
23245	ASTN2	-0.527	-0.137	TRUE	-0.452	-0.146	TRUE	-0.41	-0.087	TRUE	-0.348	-0.012	TRUE	-0.262	0.143	TRUE
171023	ASXL1	-0.413	-0.128	FALSE	-0.366	-0.106	FALSE	-0.3	-0.117	FALSE	-0.265	-0.098	FALSE	-0.185	-0.007	FALSE
80816	ASXL3	-0.283	-0.201	FALSE	-0.249	-0.21	FALSE	-0.176	-0.229	FALSE	-0.115	-0.325	FALSE	-0.038	-0.483	FALSE
136991	ASZ1	-0.351	0.04	FALSE	-0.281	0.029	FALSE	-0.21	0.005	FALSE	-0.145	-0.092	FALSE	-0.073	-0.474	FALSE
84896	ATAD1	-0.261	0.104	FALSE	-0.212	0.051	FALSE	-0.154	0.019	FALSE	-0.087	0.029	FALSE	-0.004	0.013	FALSE
29028	ATAD2	-0.308	-0.23	FALSE	-0.284	-0.204	FALSE	-0.258	-0.171	FALSE	-0.209	-0.221	FALSE	-0.143	-0.18	FALSE
54454	ATAD2B	-0.369	-0.041	FALSE	-0.248	-0.058	FALSE	-0.174	-0.079	FALSE	-0.131	-0.101	FALSE	-0.071	-0.022	FALSE
55210	ATAD3A	-0.479	0.004	TRUE	-0.414	0.024	TRUE	-0.361	0.063	TRUE	-0.298	0.09	TRUE	-0.147	-0.034	TRUE
83858	ATAD3B	-0.921	0.017	TRUE	-0.819	0.091	TRUE	-0.717	0.161	TRUE	-0.64	0.296	TRUE	-0.474	0.488	TRUE
219293	ATAD3C	-0.239	-0.121	FALSE	-0.186	-0.112	FALSE	-0.151	-0.093	FALSE	-0.085	-0.237	FALSE	-0.017	-0.436	FALSE
79915	ATAD5	-0.425	-0.097	TRUE	-0.328	-0.126	TRUE	-0.291	-0.108	TRUE	-0.237	-0.13	TRUE	-0.155	-0.106	TRUE
79969	ATAT1	-0.298	-0.172	FALSE	-0.246	-0.192	FALSE	-0.183	-0.236	FALSE	-0.127	-0.332	FALSE	-0.078	-0.47	FALSE
85300	ATCAY	-0.352	0.101	FALSE	-0.308	0.09	FALSE	-0.247	0.097	FALSE	-0.191	0.156	FALSE	-0.104	0.023	FALSE
466	ATF1	-0.436	0.017	TRUE	-0.361	0.028	TRUE	-0.295	-0.009	TRUE	-0.247	0.055	TRUE	-0.171	0.121	TRUE
1386	ATF2	-0.235	-0.079	FALSE	-0.186	-0.025	FALSE	-0.158	-0.003	FALSE	-0.1	-0.017	FALSE	-0.024	0.117	FALSE
467	ATF3	-0.472	-0.114	TRUE	-0.369	-0.134	TRUE	-0.322	-0.119	TRUE	-0.256	-0.187	TRUE	-0.187	-0.167	TRUE
468	ATF4	-0.959	0.09	TRUE	-0.854	0.122	TRUE	-0.725	0.138	TRUE	-0.634	0.171	TRUE	-0.446	0.203	TRUE
22926	ATF6	-0.329	0.044	FALSE	-0.29	0.085	FALSE	-0.209	0.058	FALSE	-0.164	0.088	FALSE	-0.084	0.133	FALSE
1388	ATF6B	-0.28	-0.133	FALSE	-0.219	-0.132	FALSE	-0.178	-0.11	FALSE	-0.137	-0.142	FALSE	-0.078	-0.181	FALSE
11016	ATF7	-0.384	-0.016	FALSE	-0.339	0.017	FALSE	-0.275	0.042	FALSE	-0.208	-0.022	FALSE	-0.126	-0.112	FALSE
55729	ATF7IP	-0.514	0.09	TRUE	-0.383	0.126	TRUE	-0.33	0.142	TRUE	-0.278	0.141	TRUE	-0.17	0.159	TRUE
80063	ATF7IP2	-0.316	-0.041	FALSE	-0.259	-0.017	FALSE	-0.212	-0.06	FALSE	-0.165	-0.033	FALSE	-0.092	-0.087	FALSE
83734	ATG10	-0.33	-0.075	FALSE	-0.234	-0.153	FALSE	-0.193	-0.14	FALSE	-0.157	-0.118	FALSE	-0.092	-0.177	FALSE
60673	ATG101	-0.423	-0.11	FALSE	-0.377	-0.105	FALSE	-0.309	-0.147	FALSE	-0.249	-0.134	FALSE	-0.136	-0.205	FALSE
9140	ATG12	-0.346	0.154	FALSE	-0.261	0.098	FALSE	-0.209	0.1	FALSE	-0.143	0.11	FALSE	-0.069	0.154	FALSE
9776	ATG13	-0.469	-0.176	TRUE	-0.378	-0.172	TRUE	-0.317	-0.196	TRUE	-0.25	-0.216	TRUE	-0.171	-0.177	TRUE
22863	ATG14	-0.394	-0.101	FALSE	-0.333	-0.159	FALSE	-0.293	-0.159	FALSE	-0.241	-0.152	FALSE	-0.166	-0.101	FALSE
55054	ATG16L1	-0.259	-0.18	FALSE	-0.229	-0.224	FALSE	-0.191	-0.245	FALSE	-0.155	-0.267	FALSE	-0.094	-0.334	FALSE
89849	ATG16L2	-0.377	0.116	FALSE	-0.305	0.124	FALSE	-0.199	0.02	FALSE	-0.148	-0.066	FALSE	-0.084	-0.013	FALSE
23130	ATG2A	-0.319	-0.071	FALSE	-0.235	-0.123	FALSE	-0.203	-0.103	FALSE	-0.173	-0.136	FALSE	-0.124	-0.182	FALSE
55102	ATG2B	-0.308	-0.207	FALSE	-0.234	-0.282	FALSE	-0.188	-0.319	FALSE	-0.138	-0.366	FALSE	-0.081	-0.298	FALSE
64422	ATG3	-0.304	-0.201	FALSE	-0.248	-0.192	FALSE	-0.193	-0.258	FALSE	-0.161	-0.311	FALSE	-0.114	-0.289	FALSE
115201	ATG4A	-0.243	0.164	FALSE	-0.171	0.102	FALSE	-0.138	0.053	FALSE	-0.094	0.098	FALSE	-0.013	0.114	FALSE
23192	ATG4B	-0.274	-0.049	FALSE	-0.238	0.024	FALSE	-0.194	0.024	FALSE	-0.142	0.018	FALSE	-0.059	0.015	FALSE
84938	ATG4C	-0.46	0.117	TRUE	-0.366	0.144	TRUE	-0.311	0.088	TRUE	-0.251	0.005	TRUE	-0.187	0.065	TRUE
84971	ATG4D	-0.458	0.043	TRUE	-0.427	0.038	TRUE	-0.385	0.043	TRUE	-0.315	0.021	TRUE	-0.22	0.033	TRUE
9474	ATG5	-0.195	-0.093	FALSE	-0.156	-0.172	FALSE	-0.111	-0.177	FALSE	-0.067	-0.256	FALSE	-0.006	-0.293	FALSE
10533	ATG7	-0.439	-0.023	TRUE	-0.353	-0.04	TRUE	-0.304	0.008	TRUE	-0.26	-0.002	TRUE	-0.176	-0.014	TRUE
79065	ATG9A	-0.358	-0.117	FALSE	-0.321	-0.083	FALSE	-0.274	-0.065	FALSE	-0.214	-0.116	FALSE	-0.129	-0.224	FALSE
471	ATIC	-0.605	-0.005	TRUE	-0.494	-0.011	TRUE	-0.437	0.001	TRUE	-0.374	0.005	TRUE	-0.277	-0.016	TRUE
51062	ATL1	-0.428	-0.045	TRUE	-0.353	-0.122	TRUE	-0.275	-0.143	TRUE	-0.199	-0.21	TRUE	-0.096	-0.36	TRUE
64225	ATL2	-0.635	-0.124	TRUE	-0.572	-0.102	TRUE	-0.534	-0.082	TRUE	-0.469	-0.074	TRUE	-0.368	-0.056	TRUE
25923	ATL3	-0.291	-0.041	FALSE	-0.216	-0.045	FALSE	-0.167	-0.039	FALSE	-0.109	-0.085	FALSE	-0.047	-0.116	FALSE
472	ATM	-0.238	0.483	FALSE	-0.197	0.485	FALSE	-0.145	0.388	FALSE	-0.111	0.175	FALSE	-0.062	0.166	FALSE
23300	ATMIN	-0.326	-0.057	FALSE	-0.297	-0.063	FALSE	-0.276	-0.064	FALSE	-0.22	-0.092	FALSE	-0.154	-0.147	FALSE
1822	ATN1	-0.352	-0.087	FALSE	-0.306	-0.087	FALSE	-0.27	-0.114	FALSE	-0.217	-0.137	FALSE	-0.155	-0.142	FALSE
474	ATOH1	-0.371	0.238	FALSE	-0.283	0.145	FALSE	-0.226	0.196	FALSE	-0.159	0.207	FALSE	-0.089	0.362	FALSE
220202	ATOH7	-0.285	-0.088	FALSE	-0.255	-0.023	FALSE	-0.234	0.063	FALSE	-0.188	0.083	FALSE	-0.112	0.091	FALSE
84913	ATOH8	-0.555	0.024	TRUE	-0.496	0.07	TRUE	-0.419	0.068	TRUE	-0.358	0.046	TRUE	-0.258	0.109	TRUE
475	ATOX1	-0.392	0.01	FALSE	-0.339	0.047	FALSE	-0.278	0.033	FALSE	-0.213	0.011	FALSE	-0.13	0.062	FALSE
57194	ATP10A	-0.417	0.267	FALSE	-0.326	0.309	FALSE	-0.264	0.278	FALSE	-0.195	0.263	FALSE	-0.084	0.315	FALSE
23120	ATP10B	-0.203	-0.198	FALSE	-0.167	-0.188	FALSE	-0.13	-0.261	FALSE	-0.077	-0.345	FALSE	-0.041	-0.493	FALSE
57205	ATP10D	-0.442	0.232	TRUE	-0.382	0.186	TRUE	-0.324	0.146	TRUE	-0.25	0.073	TRUE	-0.146	0.017	TRUE
23250	ATP11A	-0.384	0.158	FALSE	-0.319	0.195	FALSE	-0.239	0.178	FALSE	-0.176	0.182	FALSE	-0.075	0.179	FALSE
23200	ATP11B	-0.239	0.142	FALSE	-0.184	0.119	FALSE	-0.149	0.131	FALSE	-0.1	0.175	FALSE	-0.037	0.368	FALSE
286410	ATP11C	-0.365	0.042	FALSE	-0.289	0.111	FALSE	-0.223	0.103	FALSE	-0.169	0.103	FALSE	-0.089	0.096	FALSE
479	ATP12A	-0.423	0.241	FALSE	-0.333	0.13	FALSE	-0.252	0.068	FALSE	-0.189	0.009	FALSE	-0.124	0.069	FALSE
57130	ATP13A1	-0.386	-0.047	FALSE	-0.342	0.019	FALSE	-0.312	0.009	FALSE	-0.275	0.054	FALSE	-0.203	0.042	FALSE
23400	ATP13A2	-0.293	-0.072	FALSE	-0.253	-0.05	FALSE	-0.202	-0.016	FALSE	-0.136	-0.069	FALSE	-0.067	-0.049	FALSE
79572	ATP13A3	-0.355	-0.191	FALSE	-0.292	-0.221	FALSE	-0.235	-0.273	FALSE	-0.165	-0.378	FALSE	-0.106	-0.422	FALSE
84239	ATP13A4	-0.308	-0.168	FALSE	-0.24	-0.223	FALSE	-0.196	-0.279	FALSE	-0.138	-0.39	FALSE	-0.08	-0.446	FALSE
344905	ATP13A5	-0.226	-0.074	FALSE	-0.199	-0.007	FALSE	-0.115	-0.104	FALSE	-0.063	-0.178	FALSE	-0.015	-0.361	FALSE
476	ATP1A1	-1.349	0.121	TRUE	-1.211	0.175	TRUE	-1.13	0.21	TRUE	-1.007	0.282	TRUE	-0.821	0.325	TRUE
477	ATP1A2	-0.304	-0.027	FALSE	-0.22	-0.083	FALSE	-0.181	-0.031	FALSE	-0.121	-0.069	FALSE	-0.068	-0.021	FALSE
478	ATP1A3	-0.303	0.063	FALSE	-0.27	0.041	FALSE	-0.212	-0.03	FALSE	-0.175	-0.023	FALSE	-0.113	0.037	FALSE
480	ATP1A4	-0.289	-0.039	FALSE	-0.253	0	FALSE	-0.207	-0.022	FALSE	-0.157	-0.014	FALSE	-0.089	-0.018	FALSE
481	ATP1B1	-0.211	0.012	FALSE	-0.19	0.028	FALSE	-0.138	0.016	FALSE	-0.095	-0.028	FALSE	-0.048	0.068	FALSE
482	ATP1B2	-0.283	-0.206	FALSE	-0.228	-0.213	FALSE	-0.191	-0.192	FALSE	-0.15	-0.247	FALSE	-0.092	-0.453	FALSE
483	ATP1B3	-0.525	0.009	TRUE	-0.486	0.071	TRUE	-0.403	0.088	TRUE	-0.314	0.055	TRUE	-0.193	0.051	TRUE
23439	ATP1B4	-0.237	0	FALSE	-0.189	0.009	FALSE	-0.141	-0.032	FALSE	-0.11	-0.04	FALSE	-0.065	-0.051	FALSE
91419	ATP23	-0.572	-0.208	TRUE	-0.507	-0.189	TRUE	-0.406	-0.218	TRUE	-0.325	-0.236	TRUE	-0.226	-0.258	TRUE
488	ATP2A2	-1.151	-0.058	TRUE	-1.116	-0.022	TRUE	-1.072	-0.005	TRUE	-1.004	0.035	TRUE	-0.833	0.049	TRUE
489	ATP2A3	-0.271	-0.011	FALSE	-0.191	-0.038	FALSE	-0.15	-0.014	FALSE	-0.109	0.026	FALSE	-0.044	0.083	FALSE
490	ATP2B1	-0.546	-0.101	TRUE	-0.433	-0.132	TRUE	-0.378	-0.108	TRUE	-0.335	-0.046	TRUE	-0.247	0.008	TRUE
491	ATP2B2	-0.328	0.013	FALSE	-0.294	0.041	FALSE	-0.259	0.045	FALSE	-0.187	0.029	FALSE	-0.104	-0.001	FALSE
492	ATP2B3	-0.308	-0.035	FALSE	-0.252	-0.072	FALSE	-0.228	-0.004	FALSE	-0.185	0.043	FALSE	-0.11	0.067	FALSE
493	ATP2B4	-0.406	-0.223	FALSE	-0.354	-0.205	FALSE	-0.315	-0.204	FALSE	-0.265	-0.229	FALSE	-0.19	-0.245	FALSE
27032	ATP2C1	-0.37	-0.106	FALSE	-0.331	-0.041	FALSE	-0.287	-0.052	FALSE	-0.23	0.002	FALSE	-0.15	-0.052	FALSE
9914	ATP2C2	-0.442	0.107	TRUE	-0.32	0.093	TRUE	-0.232	0.025	TRUE	-0.154	-0.038	TRUE	-0.081	-0.24	TRUE
495	ATP4A	-0.499	0.193	TRUE	-0.466	0.22	TRUE	-0.386	0.263	TRUE	-0.327	0.41	TRUE	-0.203	0.566	TRUE
496	ATP4B	-0.276	-0.093	FALSE	-0.197	-0.132	FALSE	-0.152	-0.17	FALSE	-0.101	-0.237	FALSE	-0.025	-0.517	FALSE
498	ATP5F1A	-0.968	-0.007	TRUE	-0.86	0.023	TRUE	-0.745	0.04	TRUE	-0.678	0.094	TRUE	-0.513	0.133	TRUE
506	ATP5F1B	-0.94	-0.068	TRUE	-0.878	-0.057	TRUE	-0.819	-0.026	TRUE	-0.735	-0.038	TRUE	-0.626	-0.006	TRUE
509	ATP5F1C	-1.067	0.046	TRUE	-0.916	0.07	TRUE	-0.816	0.083	TRUE	-0.698	0.089	TRUE	-0.517	0.002	TRUE
513	ATP5F1D	-0.633	-0.088	TRUE	-0.59	-0.084	TRUE	-0.563	-0.039	TRUE	-0.5	-0.024	TRUE	-0.409	0.005	TRUE
514	ATP5F1E	-0.556	0.14	TRUE	-0.486	0.145	TRUE	-0.439	0.204	TRUE	-0.366	0.309	TRUE	-0.23	0.398	TRUE
93974	ATP5IF1	-0.157	-0.117	FALSE	-0.133	-0.082	FALSE	-0.113	-0.021	FALSE	-0.089	0.036	FALSE	-0.061	0.184	FALSE
516	ATP5MC1	-0.365	0.075	FALSE	-0.298	0.146	FALSE	-0.253	0.097	FALSE	-0.218	0.076	FALSE	-0.149	0.177	FALSE
517	ATP5MC2	-0.396	0.036	FALSE	-0.335	0.133	FALSE	-0.271	0.126	FALSE	-0.218	0.086	FALSE	-0.123	0.042	FALSE
518	ATP5MC3	-0.385	0.096	FALSE	-0.307	0.024	FALSE	-0.242	0.016	FALSE	-0.17	0.048	FALSE	-0.086	-0.013	FALSE
84833	ATP5MD	-0.504	-0.111	TRUE	-0.458	-0.136	TRUE	-0.385	-0.148	TRUE	-0.313	-0.14	TRUE	-0.194	-0.099	TRUE
521	ATP5ME	-0.847	-0.03	TRUE	-0.775	0.006	TRUE	-0.709	0.05	TRUE	-0.649	0.136	TRUE	-0.518	0.134	TRUE
9551	ATP5MF	-0.709	-0.056	TRUE	-0.566	-0.098	TRUE	-0.519	-0.056	TRUE	-0.449	-0.06	TRUE	-0.337	-0.053	TRUE
10632	ATP5MG	-0.473	-0.113	TRUE	-0.431	-0.077	TRUE	-0.378	-0.11	TRUE	-0.327	-0.09	TRUE	-0.244	-0.12	TRUE
9556	ATP5MPL	-0.739	0.021	TRUE	-0.659	0.099	TRUE	-0.589	0.201	TRUE	-0.503	0.365	TRUE	-0.352	0.929	TRUE
515	ATP5PB	-0.437	-0.127	TRUE	-0.407	-0.071	TRUE	-0.355	-0.003	TRUE	-0.3	-0.056	TRUE	-0.219	-0.107	TRUE
10476	ATP5PD	-0.894	0.049	TRUE	-0.839	0.127	TRUE	-0.766	0.229	TRUE	-0.637	0.334	TRUE	-0.464	0.602	TRUE
522	ATP5PF	-0.594	-0.04	TRUE	-0.54	-0.014	TRUE	-0.473	-0.039	TRUE	-0.425	-0.001	TRUE	-0.328	0.096	TRUE
539	ATP5PO	-0.881	0.053	TRUE	-0.78	0.115	TRUE	-0.706	0.143	TRUE	-0.608	0.163	TRUE	-0.447	0.176	TRUE
27109	DMAC2L	-0.2	-0.098	FALSE	-0.174	-0.032	FALSE	-0.142	-0.01	FALSE	-0.095	0	FALSE	-0.019	-0.251	FALSE
537	ATP6AP1	-1.268	-0.048	TRUE	-1.201	0.018	TRUE	-1.07	-0.017	TRUE	-0.976	-0.028	TRUE	-0.855	-0.144	TRUE
92270	ATP6AP1L	-0.398	-0.076	FALSE	-0.332	-0.09	FALSE	-0.302	-0.136	FALSE	-0.228	-0.181	FALSE	-0.118	-0.249	FALSE
10159	ATP6AP2	-0.913	-0.2	TRUE	-0.863	-0.164	TRUE	-0.799	-0.145	TRUE	-0.751	-0.158	TRUE	-0.65	-0.225	TRUE
535	ATP6V0A1	-0.369	0.1	FALSE	-0.276	0.038	FALSE	-0.211	0.034	FALSE	-0.168	0.049	FALSE	-0.098	0.07	FALSE
23545	ATP6V0A2	-0.309	-0.142	FALSE	-0.257	-0.131	FALSE	-0.147	-0.284	FALSE	-0.105	-0.403	FALSE	-0.063	-0.582	FALSE
50617	ATP6V0A4	-0.508	0.105	TRUE	-0.442	0.147	TRUE	-0.36	0.087	TRUE	-0.305	0.101	TRUE	-0.217	0.144	TRUE
533	ATP6V0B	-0.993	-0.038	TRUE	-0.893	-0.016	TRUE	-0.828	0.004	TRUE	-0.782	0.089	TRUE	-0.665	0.276	TRUE
527	ATP6V0C	-1.95	0.036	TRUE	-1.753	0.047	TRUE	-1.65	0.061	TRUE	-1.484	0.081	TRUE	-1.307	0.172	TRUE
9114	ATP6V0D1	-1.026	-0.011	TRUE	-0.932	0.069	TRUE	-0.881	0.168	TRUE	-0.808	0.264	TRUE	-0.701	0.419	TRUE
245972	ATP6V0D2	-0.137	0.058	FALSE	-0.092	-0.026	FALSE	-0.061	-0.015	FALSE	-0.03	0.066	FALSE	0.007	0.219	FALSE
8992	ATP6V0E1	-0.467	0.15	TRUE	-0.404	0.165	TRUE	-0.347	0.085	TRUE	-0.306	0.162	TRUE	-0.212	0.205	TRUE
155066	ATP6V0E2	-0.073	0.239	FALSE	-0.05	0.05	FALSE	-0.035	0.057	FALSE	-0.009	0.126	FALSE	0.023	0.275	FALSE
523	ATP6V1A	-1.205	-0.126	TRUE	-1.129	-0.087	TRUE	-1.033	-0.052	TRUE	-0.912	-0.064	TRUE	-0.779	-0.02	TRUE
525	ATP6V1B1	-0.256	-0.105	FALSE	-0.22	-0.044	FALSE	-0.159	-0.086	FALSE	-0.115	-0.085	FALSE	-0.058	-0.024	FALSE
526	ATP6V1B2	-1.622	0.157	TRUE	-1.508	0.167	TRUE	-1.401	0.222	TRUE	-1.242	0.209	TRUE	-0.982	0.232	TRUE
528	ATP6V1C1	-0.713	-0.116	TRUE	-0.614	-0.131	TRUE	-0.555	-0.134	TRUE	-0.491	-0.153	TRUE	-0.397	-0.182	TRUE
245973	ATP6V1C2	-0.23	0.065	FALSE	-0.174	0.067	FALSE	-0.142	0.107	FALSE	-0.09	0.075	FALSE	-0.032	-0.02	FALSE
51382	ATP6V1D	-0.694	-0.067	TRUE	-0.564	-0.13	TRUE	-0.506	-0.152	TRUE	-0.454	-0.188	TRUE	-0.38	-0.121	TRUE
9296	ATP6V1F	-0.968	0.024	TRUE	-0.902	0.08	TRUE	-0.856	0.162	TRUE	-0.811	0.275	TRUE	-0.527	0.279	TRUE
534	ATP6V1G2	-0.453	0.099	TRUE	-0.38	0.068	TRUE	-0.333	0.112	TRUE	-0.271	0.112	TRUE	-0.179	0.156	TRUE
127124	ATP6V1G3	-0.487	0.602	TRUE	-0.383	0.582	TRUE	-0.289	0.637	TRUE	-0.213	0.617	TRUE	-0.073	0.394	TRUE
51606	ATP6V1H	-0.515	0	TRUE	-0.455	0.047	TRUE	-0.402	0.022	TRUE	-0.343	0.099	TRUE	-0.245	0.183	TRUE
538	ATP7A	-0.401	0.08	FALSE	-0.346	0.095	FALSE	-0.303	0.053	FALSE	-0.243	0.047	FALSE	-0.143	-0.039	FALSE
540	ATP7B	-0.509	0.031	TRUE	-0.434	0.019	TRUE	-0.377	0.049	TRUE	-0.314	-0.035	TRUE	-0.238	0.043	TRUE
10396	ATP8A1	-0.213	-0.014	FALSE	-0.166	0.03	FALSE	-0.116	0.003	FALSE	-0.066	0.012	FALSE	-0.006	-0.006	FALSE
51761	ATP8A2	-0.302	-0.036	FALSE	-0.263	-0.084	FALSE	-0.247	-0.064	FALSE	-0.198	-0.052	FALSE	-0.121	-0.075	FALSE
5205	ATP8B1	-0.242	-0.019	FALSE	-0.173	0.043	FALSE	-0.128	0.079	FALSE	-0.073	0.09	FALSE	-0.008	0.177	FALSE
57198	ATP8B2	-0.435	0.145	TRUE	-0.338	-0.039	TRUE	-0.278	-0.053	TRUE	-0.209	-0.072	TRUE	-0.148	-0.031	TRUE
148229	ATP8B3	-0.326	-0.075	FALSE	-0.249	-0.073	FALSE	-0.194	-0.153	FALSE	-0.143	-0.154	FALSE	-0.087	-0.212	FALSE
79895	ATP8B4	-0.243	0.114	FALSE	-0.189	0.113	FALSE	-0.155	0.091	FALSE	-0.122	0.058	FALSE	-0.047	0.105	FALSE
10079	ATP9A	-0.317	0.074	FALSE	-0.269	0.08	FALSE	-0.233	-0.004	FALSE	-0.172	0.02	FALSE	-0.11	0.098	FALSE
374868	ATP9B	-0.42	-0.04	FALSE	-0.325	-0.113	FALSE	-0.27	-0.119	FALSE	-0.225	-0.128	FALSE	-0.152	-0.141	FALSE
64756	ATPAF1	-0.305	-0.079	FALSE	-0.253	-0.022	FALSE	-0.208	-0.008	FALSE	-0.141	-0.038	FALSE	-0.083	-0.042	FALSE
91647	ATPAF2	-0.233	0.011	FALSE	-0.198	0.029	FALSE	-0.161	0.056	FALSE	-0.108	0.058	FALSE	-0.054	0.135	FALSE
545	ATR	-1.409	0.116	TRUE	-1.195	0.096	TRUE	-1.02	0.069	TRUE	-0.896	0.091	TRUE	-0.693	0.066	TRUE
51374	ATRAID	-0.636	-0.094	TRUE	-0.566	-0.005	TRUE	-0.455	0.022	TRUE	-0.372	0.122	TRUE	-0.239	0.48	TRUE
84126	ATRIP	-0.592	-0.29	TRUE	-0.519	-0.297	TRUE	-0.491	-0.291	TRUE	-0.45	-0.261	TRUE	-0.374	-0.259	TRUE
8455	ATRN	-0.292	-0.026	FALSE	-0.206	-0.08	FALSE	-0.169	-0.064	FALSE	-0.12	-0.062	FALSE	-0.057	-0.086	FALSE
26033	ATRNL1	-0.438	0.15	TRUE	-0.383	0.221	TRUE	-0.314	0.212	TRUE	-0.254	0.31	TRUE	-0.175	0.5	TRUE
546	ATRX	-0.56	0.111	TRUE	-0.485	0.12	TRUE	-0.389	0.123	TRUE	-0.311	0.146	TRUE	-0.182	0.153	TRUE
6310	ATXN1	-0.29	0.114	FALSE	-0.25	0.165	FALSE	-0.211	0.215	FALSE	-0.155	0.165	FALSE	-0.061	0.078	FALSE
25814	ATXN10	-0.298	-0.045	FALSE	-0.258	-0.065	FALSE	-0.22	-0.059	FALSE	-0.181	-0.08	FALSE	-0.113	-0.062	FALSE
6311	ATXN2	-0.16	-0.06	FALSE	-0.12	-0.11	FALSE	-0.088	-0.141	FALSE	-0.07	-0.096	FALSE	-0.041	-0.014	FALSE
11273	ATXN2L	-0.363	0.266	FALSE	-0.283	0.155	FALSE	-0.223	0.175	FALSE	-0.174	0.167	FALSE	-0.088	-0.092	FALSE
4287	ATXN3	-0.407	0.119	FALSE	-0.34	0.088	FALSE	-0.265	0.053	FALSE	-0.205	0.083	FALSE	-0.119	0.052	FALSE
6314	ATXN7	-0.487	0.018	TRUE	-0.413	0.061	TRUE	-0.342	0.066	TRUE	-0.277	0.135	TRUE	-0.161	0.207	TRUE
222255	ATXN7L1	-0.399	0.052	FALSE	-0.288	-0.12	FALSE	-0.214	-0.151	FALSE	-0.164	-0.231	FALSE	-0.061	-0.42	FALSE
127002	ATXN7L2	-0.307	0.03	FALSE	-0.255	-0.103	FALSE	-0.191	-0.141	FALSE	-0.138	-0.24	FALSE	-0.067	-0.502	FALSE
549	AUH	-0.314	-0.077	FALSE	-0.296	-0.001	FALSE	-0.251	-0.048	FALSE	-0.196	-0.04	FALSE	-0.131	0.02	FALSE
550	AUP1	-0.428	-0.009	TRUE	-0.397	0.029	TRUE	-0.321	0.018	TRUE	-0.263	-0.019	TRUE	-0.161	-0.007	TRUE
6790	AURKA	-0.984	-0.04	TRUE	-0.883	-0.064	TRUE	-0.815	-0.049	TRUE	-0.73	-0.068	TRUE	-0.598	-0.076	TRUE
54998	AURKAIP1	-0.541	-0.164	TRUE	-0.511	-0.173	TRUE	-0.472	-0.193	TRUE	-0.422	-0.166	TRUE	-0.354	-0.122	TRUE
9212	AURKB	-1.411	-0.037	TRUE	-1.178	-0.083	TRUE	-1.077	-0.084	TRUE	-0.959	-0.084	TRUE	-0.818	-0.033	TRUE
6795	AURKC	-0.268	-0.04	FALSE	-0.2	-0.07	FALSE	-0.157	-0.004	FALSE	-0.113	-0.006	FALSE	-0.047	-0.053	FALSE
26053	AUTS2	-0.471	-0.059	TRUE	-0.368	-0.107	TRUE	-0.294	-0.125	TRUE	-0.231	-0.161	TRUE	-0.128	-0.321	TRUE
57099	AVEN	-0.296	-0.031	FALSE	-0.213	-0.051	FALSE	-0.164	-0.031	FALSE	-0.105	-0.092	FALSE	-0.068	-0.333	FALSE
10677	AVIL	-0.26	-0.115	FALSE	-0.214	-0.108	FALSE	-0.169	-0.106	FALSE	-0.126	-0.141	FALSE	-0.073	-0.152	FALSE
23080	AVL9	-0.146	0.027	FALSE	-0.098	0.02	FALSE	-0.054	0.007	FALSE	-0.034	0.117	FALSE	-0.015	0.231	FALSE
551	AVP	-0.392	0.018	FALSE	-0.289	0	FALSE	-0.238	0.037	FALSE	-0.183	0.017	FALSE	-0.105	-0.071	FALSE
60370	AVPI1	-0.363	-0.134	FALSE	-0.292	-0.164	FALSE	-0.258	-0.183	FALSE	-0.195	-0.267	FALSE	-0.108	-0.401	FALSE
552	AVPR1A	-0.404	-0.063	FALSE	-0.327	-0.082	FALSE	-0.272	-0.107	FALSE	-0.215	-0.105	FALSE	-0.157	-0.012	FALSE
553	AVPR1B	-0.499	0.005	TRUE	-0.444	-0.026	TRUE	-0.374	-0.084	TRUE	-0.328	-0.023	TRUE	-0.235	-0.043	TRUE
554	AVPR2	-0.341	0.183	FALSE	-0.299	0.189	FALSE	-0.226	0.194	FALSE	-0.157	0.158	FALSE	-0.075	0.215	FALSE
158833	AWAT1	-0.251	0.18	FALSE	-0.186	0.148	FALSE	-0.145	0.177	FALSE	-0.088	0.233	FALSE	-0.027	0.261	FALSE
158835	AWAT2	-0.515	0.081	TRUE	-0.467	0.103	TRUE	-0.408	0.116	TRUE	-0.345	0.127	TRUE	-0.234	0.41	TRUE
126859	AXDND1	-0.246	-0.206	FALSE	-0.195	-0.217	FALSE	-0.153	-0.236	FALSE	-0.118	-0.316	FALSE	-0.07	-0.521	FALSE
8312	AXIN1	-0.352	0.37	FALSE	-0.293	0.372	FALSE	-0.227	0.338	FALSE	-0.154	0.326	FALSE	-0.051	0.322	FALSE
8313	AXIN2	-0.225	0.048	FALSE	-0.186	0.123	FALSE	-0.129	0.036	FALSE	-0.094	0.034	FALSE	-0.041	0.009	FALSE
558	AXL	-0.294	-0.14	FALSE	-0.237	-0.15	FALSE	-0.19	-0.168	FALSE	-0.15	-0.162	FALSE	-0.086	-0.161	FALSE
563	AZGP1	-0.257	-0.266	FALSE	-0.217	-0.233	FALSE	-0.19	-0.226	FALSE	-0.14	-0.23	FALSE	-0.081	-0.225	FALSE
64343	AZI2	-0.328	0	FALSE	-0.238	-0.062	FALSE	-0.176	-0.063	FALSE	-0.107	-0.093	FALSE	-0.035	-0.221	FALSE
51582	AZIN1	-0.516	-0.097	TRUE	-0.474	-0.097	TRUE	-0.409	-0.112	TRUE	-0.359	-0.065	TRUE	-0.279	0.106	TRUE
113451	AZIN2	-0.382	-0.053	FALSE	-0.35	-0.081	FALSE	-0.288	-0.08	FALSE	-0.235	-0.093	FALSE	-0.145	-0.19	FALSE
566	AZU1	-0.649	-0.103	TRUE	-0.531	-0.075	TRUE	-0.483	0.01	TRUE	-0.416	0.109	TRUE	-0.334	0.126	TRUE
567	B2M	-0.299	0.048	FALSE	-0.243	0.111	FALSE	-0.21	0.115	FALSE	-0.132	0.104	FALSE	-0.054	0.101	FALSE
8706	B3GALNT1	-0.234	-0.071	FALSE	-0.191	-0.004	FALSE	-0.141	0.023	FALSE	-0.094	0.01	FALSE	-0.022	-0.097	FALSE
148789	B3GALNT2	-0.24	0.107	FALSE	-0.2	0.107	FALSE	-0.136	0.134	FALSE	-0.074	0.024	FALSE	-0.012	-0.039	FALSE
8708	B3GALT1	-0.323	-0.133	FALSE	-0.28	-0.15	FALSE	-0.225	-0.165	FALSE	-0.156	-0.247	FALSE	-0.095	-0.313	FALSE
8707	B3GALT2	-0.164	-0.043	FALSE	-0.121	0.001	FALSE	-0.089	0.031	FALSE	-0.037	-0.016	FALSE	-0.004	0.139	FALSE
8705	B3GALT4	-0.13	-0.11	FALSE	-0.101	-0.074	FALSE	-0.078	-0.02	FALSE	-0.054	0.025	FALSE	-0.012	0.115	FALSE
10317	B3GALT5	-0.165	0.134	FALSE	-0.115	0.17	FALSE	-0.072	0.103	FALSE	-0.034	0.201	FALSE	0.029	0.071	FALSE
126792	B3GALT6	-0.422	0.131	FALSE	-0.306	0.027	FALSE	-0.259	0.028	FALSE	-0.224	0.006	FALSE	-0.14	-0.02	FALSE
27087	B3GAT1	-0.09	-0.085	FALSE	-0.067	-0.099	FALSE	-0.042	-0.071	FALSE	-0.026	0.005	FALSE	-0.003	0.123	FALSE
135152	B3GAT2	-0.417	0.129	FALSE	-0.334	0.156	FALSE	-0.285	0.152	FALSE	-0.234	0.206	FALSE	-0.14	0.085	FALSE
26229	B3GAT3	-0.461	-0.086	TRUE	-0.393	-0.051	TRUE	-0.354	-0.079	TRUE	-0.303	-0.061	TRUE	-0.216	0.043	TRUE
145173	B3GLCT	-0.54	0.077	TRUE	-0.473	0.165	TRUE	-0.41	0.223	TRUE	-0.314	0.205	TRUE	-0.211	0.131	TRUE
10678	B3GNT2	-0.56	0.126	TRUE	-0.451	0.149	TRUE	-0.344	0.145	TRUE	-0.264	0.166	TRUE	-0.153	0.153	TRUE
10331	B3GNT3	-0.319	-0.169	FALSE	-0.298	-0.116	FALSE	-0.272	-0.072	FALSE	-0.225	-0.062	FALSE	-0.158	-0.121	FALSE
79369	B3GNT4	-0.368	-0.221	FALSE	-0.296	-0.211	FALSE	-0.261	-0.186	FALSE	-0.218	-0.209	FALSE	-0.163	-0.252	FALSE
84002	B3GNT5	-0.217	0.012	FALSE	-0.174	-0.022	FALSE	-0.127	-0.026	FALSE	-0.088	0.014	FALSE	-0.038	0.017	FALSE
192134	B3GNT6	-0.281	0.315	FALSE	-0.221	0.287	FALSE	-0.17	0.312	FALSE	-0.139	0.361	FALSE	-0.063	0.319	FALSE
374907	B3GNT8	-0.222	-0.144	FALSE	-0.167	-0.168	FALSE	-0.133	-0.152	FALSE	-0.106	-0.155	FALSE	-0.052	-0.277	FALSE
146712	B3GNTL1	-0.237	-0.164	FALSE	-0.189	-0.154	FALSE	-0.128	-0.229	FALSE	-0.073	-0.319	FALSE	-0.019	-0.507	FALSE
2583	B4GALNT1	-0.315	0.029	FALSE	-0.292	0.095	FALSE	-0.233	0.175	FALSE	-0.175	0.227	FALSE	-0.095	0.221	FALSE
124872	B4GALNT2	-0.322	0.079	FALSE	-0.281	0.108	FALSE	-0.231	0.147	FALSE	-0.185	0.201	FALSE	-0.098	0.229	FALSE
283358	B4GALNT3	-0.283	-0.063	FALSE	-0.235	0.006	FALSE	-0.191	0.019	FALSE	-0.161	-0.056	FALSE	-0.097	-0.042	FALSE
338707	B4GALNT4	-0.159	0.164	FALSE	-0.131	0.056	FALSE	-0.096	0.099	FALSE	-0.058	0.187	FALSE	-0.02	0.396	FALSE
2683	B4GALT1	-0.339	-0.027	FALSE	-0.284	-0.002	FALSE	-0.235	-0.009	FALSE	-0.194	0.001	FALSE	-0.119	-0.044	FALSE
8704	B4GALT2	-0.349	0.079	FALSE	-0.243	0.119	FALSE	-0.201	0.126	FALSE	-0.149	0.117	FALSE	-0.068	0.084	FALSE
8703	B4GALT3	-0.522	-0.066	TRUE	-0.466	-0.023	TRUE	-0.422	-0.016	TRUE	-0.35	-0.044	TRUE	-0.262	0.034	TRUE
8702	B4GALT4	-0.694	0.363	TRUE	-0.627	0.469	TRUE	-0.538	0.534	TRUE	-0.382	0.567	TRUE	-0.164	0.478	TRUE
9334	B4GALT5	-0.366	0.017	FALSE	-0.285	-0.054	FALSE	-0.246	-0.007	FALSE	-0.203	-0.047	FALSE	-0.123	-0.129	FALSE
11285	B4GALT7	-0.692	0.069	TRUE	-0.567	0.047	TRUE	-0.525	0.023	TRUE	-0.47	0.072	TRUE	-0.36	0.078	TRUE
27077	B9D1	-0.288	-0.028	FALSE	-0.235	-0.044	FALSE	-0.194	-0.055	FALSE	-0.15	-0.022	FALSE	-0.075	-0.134	FALSE
79870	BAALC	-0.097	0.028	FALSE	-0.078	0.16	FALSE	-0.052	0.2	FALSE	-0.041	0.319	FALSE	-0.024	0.643	FALSE
570	BAAT	-0.252	0.227	FALSE	-0.195	0.272	FALSE	-0.142	0.308	FALSE	-0.071	0.301	FALSE	-0.01	0.345	FALSE
9577	BABAM2	-0.241	0.118	FALSE	-0.184	0.171	FALSE	-0.156	0.173	FALSE	-0.108	0.17	FALSE	-0.041	0.176	FALSE
23621	BACE1	-0.467	0.235	TRUE	-0.38	0.28	TRUE	-0.316	0.357	TRUE	-0.238	0.346	TRUE	-0.134	0.389	TRUE
25825	BACE2	-0.493	0.363	TRUE	-0.439	0.335	TRUE	-0.405	0.454	TRUE	-0.332	0.48	TRUE	-0.197	0.395	TRUE
571	BACH1	-0.454	0.146	TRUE	-0.259	0.052	TRUE	-0.212	0.071	TRUE	-0.146	0.053	TRUE	-0.075	0.083	TRUE
60468	BACH2	-0.249	0.027	FALSE	-0.181	0.005	FALSE	-0.13	-0.022	FALSE	-0.082	-0.044	FALSE	-0.01	-0.019	FALSE
572	BAD	-0.287	0.002	FALSE	-0.261	0.091	FALSE	-0.211	-0.048	FALSE	-0.181	0	FALSE	-0.105	-0.001	FALSE
573	BAG1	-0.461	-0.123	TRUE	-0.402	-0.12	TRUE	-0.334	-0.132	TRUE	-0.282	-0.142	TRUE	-0.211	-0.088	TRUE
9532	BAG2	-0.39	-0.002	FALSE	-0.308	-0.031	FALSE	-0.249	-0.06	FALSE	-0.209	-0.044	FALSE	-0.145	-0.055	FALSE
9531	BAG3	-0.348	-0.007	FALSE	-0.291	-0.053	FALSE	-0.248	-0.029	FALSE	-0.189	-0.057	FALSE	-0.113	-0.025	FALSE
9530	BAG4	-0.172	0.065	FALSE	-0.123	0.127	FALSE	-0.063	0.041	FALSE	-0.048	0.144	FALSE	-0.003	0.352	FALSE
9529	BAG5	-0.49	-0.068	TRUE	-0.39	-0.14	TRUE	-0.342	-0.123	TRUE	-0.282	-0.08	TRUE	-0.208	0.112	TRUE
7917	BAG6	-0.516	0.133	TRUE	-0.449	0.158	TRUE	-0.374	0.206	TRUE	-0.292	0.231	TRUE	-0.195	0.245	TRUE
22893	BAHD1	-0.246	-0.157	FALSE	-0.203	-0.14	FALSE	-0.144	-0.173	FALSE	-0.103	-0.218	FALSE	-0.067	-0.288	FALSE
10458	BAIAP2	-0.392	0.049	FALSE	-0.284	0.072	FALSE	-0.246	0.082	FALSE	-0.179	0.087	FALSE	-0.095	0.153	FALSE
55971	BAIAP2L1	-0.226	-0.083	FALSE	-0.16	-0.081	FALSE	-0.108	-0.083	FALSE	-0.067	-0.027	FALSE	-0.025	0.036	FALSE
80115	BAIAP2L2	-0.366	-0.156	FALSE	-0.305	-0.21	FALSE	-0.256	-0.236	FALSE	-0.198	-0.245	FALSE	-0.103	-0.338	FALSE
8938	BAIAP3	-0.186	-0.054	FALSE	-0.16	0.032	FALSE	-0.127	0.013	FALSE	-0.108	0.079	FALSE	-0.081	0.259	FALSE
578	BAK1	-0.253	-0.008	FALSE	-0.221	0.04	FALSE	-0.171	0.102	FALSE	-0.129	0.157	FALSE	-0.065	0.323	FALSE
25805	BAMBI	-0.457	0.188	TRUE	-0.326	0.196	TRUE	-0.231	0.206	TRUE	-0.137	0.185	TRUE	-0.059	-0.231	TRUE
8815	BANF1	-1.016	-0.257	TRUE	-0.927	-0.234	TRUE	-0.876	-0.204	TRUE	-0.826	-0.18	TRUE	-0.721	-0.092	TRUE
140836	BANF2	-0.117	-0.002	FALSE	-0.06	-0.005	FALSE	-0.029	-0.153	FALSE	-0.019	-0.093	FALSE	0	-0.091	FALSE
55024	BANK1	-0.304	0.088	FALSE	-0.246	0.097	FALSE	-0.2	-0.001	FALSE	-0.161	0.077	FALSE	-0.083	-0.008	FALSE
8314	BAP1	-0.715	0.07	TRUE	-0.639	-0.005	TRUE	-0.559	-0.017	TRUE	-0.48	-0.013	TRUE	-0.381	-0.016	TRUE
580	BARD1	-0.635	-0.058	TRUE	-0.578	-0.016	TRUE	-0.513	0.008	TRUE	-0.432	0.05	TRUE	-0.321	0.048	TRUE
343472	BARHL2	-0.489	-0.115	TRUE	-0.442	-0.051	TRUE	-0.386	-0.041	TRUE	-0.307	-0.07	TRUE	-0.22	0	TRUE
56033	BARX1	-0.322	0.101	FALSE	-0.272	0.178	FALSE	-0.143	0.051	FALSE	-0.105	0.158	FALSE	-0.031	0.152	FALSE
8538	BARX2	-0.342	-0.012	FALSE	-0.293	0.039	FALSE	-0.229	0.046	FALSE	-0.178	0.114	FALSE	-0.086	0.15	FALSE
10409	BASP1	-0.075	0.202	FALSE	-0.048	0.309	FALSE	-0.018	0.353	FALSE	0.001	0.436	FALSE	0.02	0.577	FALSE
10538	BATF	-0.44	0.056	TRUE	-0.361	0.151	TRUE	-0.222	0.086	TRUE	-0.176	0.13	TRUE	-0.078	0.183	TRUE
116071	BATF2	-0.245	0.057	FALSE	-0.209	0.075	FALSE	-0.173	0.087	FALSE	-0.125	0.151	FALSE	-0.068	0.309	FALSE
55509	BATF3	-0.348	0.026	FALSE	-0.282	0.063	FALSE	-0.227	0.041	FALSE	-0.18	0.085	FALSE	-0.103	0.143	FALSE
581	BAX	-0.472	0.222	TRUE	-0.377	0.147	TRUE	-0.316	0.162	TRUE	-0.244	0.19	TRUE	-0.167	0.169	TRUE
11177	BAZ1A	-0.318	-0.157	FALSE	-0.248	-0.186	FALSE	-0.204	-0.204	FALSE	-0.161	-0.158	FALSE	-0.103	-0.124	FALSE
9031	BAZ1B	-0.554	0.003	TRUE	-0.513	-0.045	TRUE	-0.452	-0.057	TRUE	-0.376	-0.059	TRUE	-0.281	0.025	TRUE
11176	BAZ2A	-0.35	0.105	FALSE	-0.276	0.077	FALSE	-0.207	0.041	FALSE	-0.142	0.031	FALSE	-0.064	0.026	FALSE
29994	BAZ2B	-0.33	-0.054	FALSE	-0.24	-0.072	FALSE	-0.192	-0.025	FALSE	-0.138	-0.042	FALSE	-0.068	-0.011	FALSE
27113	BBC3	-0.582	0.238	TRUE	-0.533	0.232	TRUE	-0.465	0.159	TRUE	-0.409	0.162	TRUE	-0.306	0.25	TRUE
8424	BBOX1	-0.324	0.317	FALSE	-0.247	0.36	FALSE	-0.179	0.375	FALSE	-0.112	0.471	FALSE	-0.032	0.688	FALSE
582	BBS1	-0.232	-0.105	FALSE	-0.184	-0.13	FALSE	-0.163	-0.061	FALSE	-0.137	-0.069	FALSE	-0.082	0.007	FALSE
583	BBS2	-0.234	0.178	FALSE	-0.165	0.24	FALSE	-0.105	0.279	FALSE	-0.042	0.206	FALSE	-0.008	0.333	FALSE
585	BBS4	-0.258	0.126	FALSE	-0.205	0.157	FALSE	-0.171	0.172	FALSE	-0.108	0.174	FALSE	-0.034	0.016	FALSE
129880	BBS5	-0.274	-0.256	FALSE	-0.234	-0.267	FALSE	-0.192	-0.313	FALSE	-0.135	-0.42	FALSE	-0.066	-0.604	FALSE
55212	BBS7	-0.331	-0.069	FALSE	-0.246	-0.069	FALSE	-0.206	-0.044	FALSE	-0.165	-0.009	FALSE	-0.087	-0.071	FALSE
27241	BBS9	-0.258	-0.115	FALSE	-0.217	-0.115	FALSE	-0.184	-0.175	FALSE	-0.147	-0.227	FALSE	-0.105	-0.366	FALSE
56987	BBX	-0.167	0.287	FALSE	-0.114	0.283	FALSE	-0.066	0.323	FALSE	-0.031	0.387	FALSE	0.004	0.741	FALSE
4059	BCAM	-0.261	-0.184	FALSE	-0.217	-0.163	FALSE	-0.171	-0.179	FALSE	-0.135	-0.165	FALSE	-0.068	-0.25	FALSE
63827	BCAN	-0.431	-0.164	TRUE	-0.385	-0.179	TRUE	-0.309	-0.203	TRUE	-0.263	-0.233	TRUE	-0.183	-0.288	TRUE
55973	BCAP29	-0.616	-0.073	TRUE	-0.509	-0.062	TRUE	-0.413	-0.07	TRUE	-0.356	0.035	TRUE	-0.24	0.252	TRUE
9564	BCAR1	-0.786	0.047	TRUE	-0.693	0.069	TRUE	-0.607	0.124	TRUE	-0.525	0.151	TRUE	-0.4	0.205	TRUE
8412	BCAR3	-0.432	-0.035	TRUE	-0.308	-0.068	TRUE	-0.232	-0.063	TRUE	-0.168	-0.055	TRUE	-0.091	0.008	TRUE
8537	BCAS1	-0.071	0.007	FALSE	-0.037	-0.097	FALSE	-0.029	0.009	FALSE	-0.014	0.104	FALSE	0.005	0.331	FALSE
10286	BCAS2	-0.813	0.084	TRUE	-0.643	0.048	TRUE	-0.522	-0.002	TRUE	-0.434	0.008	TRUE	-0.324	-0.01	TRUE
54828	BCAS3	-0.219	-0.119	FALSE	-0.177	-0.193	FALSE	-0.157	-0.153	FALSE	-0.129	-0.166	FALSE	-0.082	-0.061	FALSE
55653	BCAS4	-0.178	0.001	FALSE	-0.123	0.027	FALSE	-0.09	0.003	FALSE	-0.071	0.024	FALSE	-0.046	-0.118	FALSE
586	BCAT1	-0.281	0.101	FALSE	-0.163	0.09	FALSE	-0.105	0.097	FALSE	-0.063	0.153	FALSE	0.002	0.305	FALSE
587	BCAT2	-0.273	0.13	FALSE	-0.224	0.15	FALSE	-0.174	0.202	FALSE	-0.126	0.237	FALSE	-0.037	0.078	FALSE
56647	BCCIP	-0.958	0.08	TRUE	-0.835	0.087	TRUE	-0.761	0.127	TRUE	-0.661	0.087	TRUE	-0.521	0.092	TRUE
144233	BCDIN3D	-0.49	-0.023	TRUE	-0.41	-0.065	TRUE	-0.353	-0.049	TRUE	-0.308	-0.004	TRUE	-0.208	-0.09	TRUE
590	BCHE	-0.276	0.187	FALSE	-0.208	0.183	FALSE	-0.16	0.17	FALSE	-0.103	0.197	FALSE	-0.017	0.309	FALSE
593	BCKDHA	-0.258	-0.064	FALSE	-0.217	-0.019	FALSE	-0.182	-0.042	FALSE	-0.142	-0.026	FALSE	-0.074	-0.173	FALSE
594	BCKDHB	-0.258	-0.031	FALSE	-0.22	0.043	FALSE	-0.174	0.028	FALSE	-0.127	0.049	FALSE	-0.071	0.077	FALSE
10295	BCKDK	-0.389	0.038	FALSE	-0.352	0.022	FALSE	-0.289	0.009	FALSE	-0.24	-0.001	FALSE	-0.155	-0.042	FALSE
8915	BCL10	-0.403	0.042	FALSE	-0.335	0.052	FALSE	-0.295	0.127	FALSE	-0.236	0.111	FALSE	-0.159	0.335	FALSE
53335	BCL11A	-0.264	0.284	FALSE	-0.22	0.176	FALSE	-0.171	0.118	FALSE	-0.137	0.163	FALSE	-0.06	0.255	FALSE
64919	BCL11B	-0.319	0.1	FALSE	-0.249	0.107	FALSE	-0.195	0.09	FALSE	-0.148	0.106	FALSE	-0.057	0.069	FALSE
596	BCL2	-0.504	0.237	TRUE	-0.391	0.125	TRUE	-0.236	0.079	TRUE	-0.17	0.118	TRUE	-0.046	0.042	TRUE
597	BCL2A1	-0.284	-0.141	FALSE	-0.239	-0.107	FALSE	-0.199	-0.094	FALSE	-0.16	-0.136	FALSE	-0.096	-0.268	FALSE
598	BCL2L1	-1.669	0.594	TRUE	-1.526	0.705	TRUE	-1.249	0.802	TRUE	-1.04	0.97	TRUE	-0.66	1.492	TRUE
10017	BCL2L10	-0.47	0.365	TRUE	-0.314	0.175	TRUE	-0.25	0.155	TRUE	-0.205	0.134	TRUE	-0.133	0.157	TRUE
10018	BCL2L11	-0.323	-0.014	FALSE	-0.276	-0.057	FALSE	-0.237	-0.017	FALSE	-0.174	-0.087	FALSE	-0.09	-0.248	FALSE
83596	BCL2L12	-0.533	0.291	TRUE	-0.478	0.21	TRUE	-0.426	0.264	TRUE	-0.384	0.233	TRUE	-0.273	0.348	TRUE
23786	BCL2L13	-0.243	-0.209	FALSE	-0.214	-0.191	FALSE	-0.181	-0.194	FALSE	-0.137	-0.18	FALSE	-0.077	-0.252	FALSE
79370	BCL2L14	-0.396	0.129	FALSE	-0.279	0.041	FALSE	-0.219	-0.034	FALSE	-0.171	0.01	FALSE	-0.106	0.108	FALSE
599	BCL2L2	-0.437	0.051	TRUE	-0.366	0.025	TRUE	-0.323	0.06	TRUE	-0.255	0.116	TRUE	-0.148	0.102	TRUE
602	BCL3	-0.359	-0.052	FALSE	-0.291	-0.078	FALSE	-0.243	-0.041	FALSE	-0.188	-0.039	FALSE	-0.108	-0.057	FALSE
604	BCL6	-0.489	-0.037	TRUE	-0.407	-0.005	TRUE	-0.303	-0.051	TRUE	-0.229	-0.068	TRUE	-0.153	-0.052	TRUE
255877	BCL6B	-0.296	-0.17	FALSE	-0.232	-0.145	FALSE	-0.197	-0.146	FALSE	-0.146	-0.218	FALSE	-0.092	-0.217	FALSE
605	BCL7A	-0.415	0.14	FALSE	-0.354	0.12	FALSE	-0.287	0.109	FALSE	-0.229	0.146	FALSE	-0.124	0.176	FALSE
9275	BCL7B	-0.46	0.27	TRUE	-0.335	0.201	TRUE	-0.28	0.253	TRUE	-0.212	0.255	TRUE	-0.096	0.132	TRUE
9274	BCL7C	-0.116	0.073	FALSE	-0.07	0.071	FALSE	-0.051	0.172	FALSE	-0.036	0.238	FALSE	0.008	0.525	FALSE
607	BCL9	-0.461	-0.086	TRUE	-0.36	-0.11	TRUE	-0.312	-0.103	TRUE	-0.279	-0.054	TRUE	-0.198	-0.031	TRUE
283149	BCL9L	-0.382	-0.1	FALSE	-0.358	-0.021	FALSE	-0.268	-0.008	FALSE	-0.225	-0.006	FALSE	-0.146	-0.088	FALSE
9774	BCLAF1	-1.03	0.084	TRUE	-0.937	0.057	TRUE	-0.818	0.066	TRUE	-0.717	0.1	TRUE	-0.537	0.076	TRUE
256643	BCLAF3	-0.17	-0.146	FALSE	-0.142	-0.102	FALSE	-0.121	-0.08	FALSE	-0.084	-0.076	FALSE	-0.023	-0.227	FALSE
53630	BCO1	-0.703	0.411	TRUE	-0.623	0.508	TRUE	-0.482	0.555	TRUE	-0.391	0.627	TRUE	-0.199	0.65	TRUE
83875	BCO2	-0.395	0.134	FALSE	-0.317	0.15	FALSE	-0.263	0.133	FALSE	-0.199	0.217	FALSE	-0.103	0.131	FALSE
54880	BCOR	-0.51	0.265	TRUE	-0.407	0.198	TRUE	-0.351	0.198	TRUE	-0.27	0.218	TRUE	-0.146	0.237	TRUE
63035	BCORL1	-0.184	0.067	FALSE	-0.139	0.15	FALSE	-0.111	0.209	FALSE	-0.059	0.271	FALSE	-0.009	0.423	FALSE
613	BCR	-0.35	0.162	FALSE	-0.246	0.219	FALSE	-0.198	0.225	FALSE	-0.133	0.271	FALSE	-0.048	0.295	FALSE
617	BCS1L	-0.695	-0.152	TRUE	-0.61	-0.148	TRUE	-0.553	-0.113	TRUE	-0.474	-0.099	TRUE	-0.373	-0.066	TRUE
622	BDH1	-0.834	-0.02	TRUE	-0.758	0.046	TRUE	-0.676	0.06	TRUE	-0.611	0.048	TRUE	-0.481	0.045	TRUE
56898	BDH2	-0.258	0.045	FALSE	-0.213	0.055	FALSE	-0.166	0.018	FALSE	-0.123	0.018	FALSE	-0.071	0.097	FALSE
623	BDKRB1	-0.422	-0.076	FALSE	-0.346	-0.084	FALSE	-0.297	-0.112	FALSE	-0.237	-0.087	FALSE	-0.161	-0.006	FALSE
624	BDKRB2	-0.494	-0.075	TRUE	-0.423	-0.009	TRUE	-0.345	-0.017	TRUE	-0.277	-0.002	TRUE	-0.201	-0.012	TRUE
627	BDNF	-0.38	0.088	FALSE	-0.339	0.03	FALSE	-0.267	0.039	FALSE	-0.182	0.012	FALSE	-0.102	-0.136	FALSE
55814	BDP1	-0.657	0.185	TRUE	-0.551	0.206	TRUE	-0.466	0.212	TRUE	-0.36	0.202	TRUE	-0.246	0.256	TRUE
8678	BECN1	-0.545	0.319	TRUE	-0.342	0.273	TRUE	-0.305	0.201	TRUE	-0.24	0.195	TRUE	-0.151	0.148	TRUE
57596	BEGAIN	-0.575	-0.171	TRUE	-0.504	-0.164	TRUE	-0.451	-0.108	TRUE	-0.385	-0.033	TRUE	-0.311	0.033	TRUE
139105	BEND2	-0.222	-0.058	FALSE	-0.182	0.003	FALSE	-0.146	0.008	FALSE	-0.063	-0.114	FALSE	0	-0.463	FALSE
79656	BEND5	-0.215	-0.195	FALSE	-0.172	-0.152	FALSE	-0.134	-0.18	FALSE	-0.088	-0.244	FALSE	-0.035	-0.487	FALSE
221336	BEND6	-0.373	-0.156	FALSE	-0.332	-0.16	FALSE	-0.289	-0.146	FALSE	-0.24	-0.15	FALSE	-0.129	-0.128	FALSE
7439	BEST1	-0.271	0.131	FALSE	-0.199	0.146	FALSE	-0.141	0.169	FALSE	-0.064	0.071	FALSE	-0.02	-0.324	FALSE
54831	BEST2	-0.334	-0.075	FALSE	-0.262	-0.124	FALSE	-0.229	-0.125	FALSE	-0.169	-0.214	FALSE	-0.076	-0.454	FALSE
144453	BEST3	-0.248	-0.084	FALSE	-0.204	-0.123	FALSE	-0.172	-0.134	FALSE	-0.12	-0.256	FALSE	-0.076	-0.535	FALSE
266675	BEST4	-0.252	-0.036	FALSE	-0.179	-0.028	FALSE	-0.147	0.026	FALSE	-0.097	-0.01	FALSE	-0.065	-0.136	FALSE
10282	BET1	-0.542	-0.181	TRUE	-0.452	-0.181	TRUE	-0.396	-0.165	TRUE	-0.356	-0.143	TRUE	-0.287	-0.098	TRUE
55859	BEX1	-0.114	-0.162	FALSE	-0.083	-0.266	FALSE	-0.05	-0.286	FALSE	-0.034	-0.32	FALSE	-0.015	-0.374	FALSE
84707	BEX2	-0.158	-0.019	FALSE	-0.12	-0.065	FALSE	-0.093	-0.05	FALSE	-0.066	-0.033	FALSE	-0.04	-0.011	FALSE
27018	BEX3	-0.211	0.193	FALSE	-0.168	0.194	FALSE	-0.092	0.138	FALSE	-0.049	0.116	FALSE	-0.016	0.327	FALSE
340542	BEX5	-0.448	0.088	TRUE	-0.346	0.074	TRUE	-0.288	0.092	TRUE	-0.216	0.001	TRUE	-0.066	-0.398	TRUE
51283	BFAR	-0.218	0.12	FALSE	-0.16	0.192	FALSE	-0.124	0.249	FALSE	-0.069	0.374	FALSE	-0.027	0.627	FALSE
631	BFSP1	-0.387	0.134	FALSE	-0.325	0.027	FALSE	-0.274	0.029	FALSE	-0.212	0.053	FALSE	-0.15	0.128	FALSE
8419	BFSP2	-0.208	-0.101	FALSE	-0.17	-0.071	FALSE	-0.141	-0.088	FALSE	-0.089	-0.15	FALSE	-0.024	-0.259	FALSE
632	BGLAP	-0.057	0.092	FALSE	0	0.187	FALSE	0.029	0.212	FALSE	0.067	0.312	FALSE	0.126	0.6	FALSE
633	BGN	-0.432	-0.031	TRUE	-0.415	0.013	TRUE	-0.376	0.026	TRUE	-0.291	0.037	TRUE	-0.187	0.169	TRUE
168620	BHLHA15	-0.279	-0.244	FALSE	-0.193	-0.309	FALSE	-0.159	-0.32	FALSE	-0.144	-0.268	FALSE	-0.09	-0.258	FALSE
80823	BHLHB9	-0.179	-0.257	FALSE	-0.137	-0.248	FALSE	-0.09	-0.304	FALSE	-0.066	-0.349	FALSE	-0.032	-0.568	FALSE
27319	BHLHE22	-0.365	0.211	FALSE	-0.311	0.145	FALSE	-0.264	0.146	FALSE	-0.216	0.12	FALSE	-0.121	0.03	FALSE
128408	BHLHE23	-0.32	0.093	FALSE	-0.256	0.078	FALSE	-0.207	0.111	FALSE	-0.149	0.194	FALSE	-0.058	0.203	FALSE
8553	BHLHE40	-0.314	0.019	FALSE	-0.242	0.051	FALSE	-0.219	0.094	FALSE	-0.162	0.118	FALSE	-0.08	0.211	FALSE
79365	BHLHE41	-0.453	0.33	TRUE	-0.377	0.29	TRUE	-0.336	0.351	TRUE	-0.26	0.451	TRUE	-0.131	0.493	TRUE
635	BHMT	-0.241	-0.136	FALSE	-0.214	-0.086	FALSE	-0.176	-0.097	FALSE	-0.131	-0.15	FALSE	-0.07	-0.206	FALSE
23743	BHMT2	-0.423	0.218	FALSE	-0.355	0.25	FALSE	-0.312	0.15	FALSE	-0.256	0.128	FALSE	-0.166	0.163	FALSE
80114	BICC1	-0.36	-0.122	FALSE	-0.288	-0.2	FALSE	-0.227	-0.238	FALSE	-0.144	-0.327	FALSE	-0.06	-0.472	FALSE
636	BICD1	-0.182	0.073	FALSE	-0.156	-0.012	FALSE	-0.134	0.031	FALSE	-0.104	0.081	FALSE	-0.074	0.107	FALSE
23299	BICD2	-0.439	0.044	TRUE	-0.352	-0.024	TRUE	-0.309	-0.022	TRUE	-0.266	-0.067	TRUE	-0.183	-0.102	TRUE
92558	BICDL1	-0.291	0.067	FALSE	-0.242	0.048	FALSE	-0.181	0.021	FALSE	-0.114	-0.105	FALSE	-0.057	-0.348	FALSE
29998	BICRA	-0.316	0.14	FALSE	-0.224	0.206	FALSE	-0.16	0.209	FALSE	-0.101	0.197	FALSE	-0.041	0.223	FALSE
637	BID	-0.283	0.197	FALSE	-0.21	0.116	FALSE	-0.167	0.105	FALSE	-0.126	0.096	FALSE	-0.042	0.008	FALSE
638	BIK	-0.274	0.23	FALSE	-0.221	0.179	FALSE	-0.171	0.181	FALSE	-0.099	0.175	FALSE	-0.028	-0.001	FALSE
274	BIN1	-0.502	-0.151	TRUE	-0.429	-0.141	TRUE	-0.383	-0.151	TRUE	-0.329	-0.13	TRUE	-0.232	-0.081	TRUE
51411	BIN2	-0.245	-0.201	FALSE	-0.2	-0.249	FALSE	-0.171	-0.238	FALSE	-0.138	-0.217	FALSE	-0.081	-0.248	FALSE
55909	BIN3	-0.16	-0.088	FALSE	-0.128	-0.109	FALSE	-0.082	-0.113	FALSE	-0.035	-0.138	FALSE	0.026	-0.231	FALSE
329	BIRC2	-0.511	-0.036	TRUE	-0.435	0.01	TRUE	-0.351	-0.014	TRUE	-0.283	0.007	TRUE	-0.208	0.124	TRUE
330	BIRC3	-0.312	-0.039	FALSE	-0.247	-0.03	FALSE	-0.167	-0.093	FALSE	-0.118	-0.099	FALSE	-0.052	-0.12	FALSE
332	BIRC5	-1.539	0.031	TRUE	-1.383	0.077	TRUE	-1.281	0.043	TRUE	-1.212	0.1	TRUE	-1.031	0.107	TRUE
57448	BIRC6	-0.812	0.185	TRUE	-0.602	0.079	TRUE	-0.505	0.062	TRUE	-0.423	0.046	TRUE	-0.314	0.001	TRUE
79444	BIRC7	-0.316	-0.094	FALSE	-0.249	-0.127	FALSE	-0.211	-0.127	FALSE	-0.17	-0.129	FALSE	-0.118	-0.118	FALSE
112401	BIRC8	-0.525	0.208	TRUE	-0.46	0.158	TRUE	-0.394	0.171	TRUE	-0.308	0.191	TRUE	-0.195	0.119	TRUE
54841	BIVM	-0.251	-0.12	FALSE	-0.215	-0.063	FALSE	-0.168	-0.086	FALSE	-0.114	-0.186	FALSE	-0.035	-0.502	FALSE
10904	BLCAP	-0.35	-0.106	FALSE	-0.31	-0.052	FALSE	-0.252	-0.05	FALSE	-0.207	-0.037	FALSE	-0.125	-0.139	FALSE
640	BLK	-0.294	-0.074	FALSE	-0.248	-0.06	FALSE	-0.207	-0.037	FALSE	-0.13	-0.05	FALSE	-0.06	-0.07	FALSE
641	BLM	-0.434	0.008	TRUE	-0.368	-0.065	TRUE	-0.321	-0.061	TRUE	-0.265	-0.059	TRUE	-0.187	-0.063	TRUE
642	BLMH	-0.166	-0.042	FALSE	-0.11	-0.016	FALSE	-0.085	-0.019	FALSE	-0.052	0.012	FALSE	-0.017	0.122	FALSE
29760	BLNK	-0.4	0.028	FALSE	-0.323	0.059	FALSE	-0.294	0.133	FALSE	-0.208	0.197	FALSE	-0.127	0.253	FALSE
2647	BLOC1S1	-0.132	0.284	FALSE	-0.069	0.413	FALSE	-0.045	0.568	FALSE	-0.025	0.648	FALSE	0.014	1.191	FALSE
282991	BLOC1S2	-0.571	-0.096	TRUE	-0.478	-0.147	TRUE	-0.434	-0.082	TRUE	-0.357	-0.04	TRUE	-0.23	0.11	TRUE
55330	BLOC1S4	-0.245	-0.13	FALSE	-0.166	-0.192	FALSE	-0.119	-0.24	FALSE	-0.07	-0.331	FALSE	-0.038	-0.507	FALSE
63915	BLOC1S5	-0.626	-0.054	TRUE	-0.51	-0.04	TRUE	-0.465	0.03	TRUE	-0.395	0.139	TRUE	-0.261	0.472	TRUE
26258	BLOC1S6	-0.181	0.163	FALSE	-0.143	0.247	FALSE	-0.095	0.257	FALSE	-0.068	0.311	FALSE	-0.044	0.244	FALSE
644	BLVRA	-0.286	0.345	FALSE	-0.177	0.401	FALSE	-0.127	0.504	FALSE	-0.08	0.6	FALSE	-0.009	0.697	FALSE
645	BLVRB	-0.239	0.624	FALSE	-0.203	0.759	FALSE	-0.155	0.852	FALSE	-0.066	0.91	FALSE	0	1.275	FALSE
8548	BLZF1	-0.384	-0.111	FALSE	-0.308	-0.085	FALSE	-0.273	-0.008	FALSE	-0.228	0.023	FALSE	-0.141	0.009	FALSE
90427	BMF	-0.288	-0.113	FALSE	-0.239	-0.094	FALSE	-0.195	-0.196	FALSE	-0.155	-0.289	FALSE	-0.1	-0.418	FALSE
648	BMI1	-0.329	0.114	FALSE	-0.253	0.158	FALSE	-0.196	0.155	FALSE	-0.144	0.167	FALSE	-0.044	-0.129	FALSE
649	BMP1	-0.349	0.034	FALSE	-0.281	0.048	FALSE	-0.212	-0.059	FALSE	-0.176	-0.079	FALSE	-0.104	-0.212	FALSE
27302	BMP10	-0.385	-0.032	FALSE	-0.234	-0.199	FALSE	-0.208	-0.202	FALSE	-0.15	-0.272	FALSE	-0.063	-0.544	FALSE
9210	BMP15	-0.198	-0.045	FALSE	-0.146	-0.034	FALSE	-0.105	0.012	FALSE	-0.066	0.094	FALSE	-0.019	0.085	FALSE
650	BMP2	-0.263	-0.181	FALSE	-0.201	-0.164	FALSE	-0.177	-0.122	FALSE	-0.15	-0.091	FALSE	-0.087	-0.089	FALSE
55589	BMP2K	-0.351	0.257	FALSE	-0.235	0.086	FALSE	-0.177	0.109	FALSE	-0.136	0.121	FALSE	-0.042	0.061	FALSE
651	BMP3	-0.276	-0.02	FALSE	-0.231	0.017	FALSE	-0.18	-0.054	FALSE	-0.127	-0.071	FALSE	-0.048	-0.222	FALSE
652	BMP4	-0.386	0.024	FALSE	-0.343	0.046	FALSE	-0.279	0.049	FALSE	-0.233	0.051	FALSE	-0.159	0.143	FALSE
653	BMP5	-0.176	-0.109	FALSE	-0.15	-0.073	FALSE	-0.117	-0.04	FALSE	-0.084	-0.068	FALSE	-0.041	-0.017	FALSE
654	BMP6	-0.462	-0.016	TRUE	-0.408	-0.02	TRUE	-0.351	-0.055	TRUE	-0.282	-0.033	TRUE	-0.193	-0.092	TRUE
353500	BMP8A	-0.302	-0.154	FALSE	-0.259	-0.099	FALSE	-0.227	-0.091	FALSE	-0.17	-0.096	FALSE	-0.095	-0.052	FALSE
656	BMP8B	-0.307	0.079	FALSE	-0.258	0.129	FALSE	-0.204	0.145	FALSE	-0.166	0.161	FALSE	-0.072	0.001	FALSE
168667	BMPER	-0.31	-0.018	FALSE	-0.26	0.045	FALSE	-0.199	0.019	FALSE	-0.149	0.072	FALSE	-0.072	0.062	FALSE
657	BMPR1A	-0.479	0.081	TRUE	-0.41	0.099	TRUE	-0.348	0.109	TRUE	-0.28	0.092	TRUE	-0.189	0.052	TRUE
658	BMPR1B	-0.438	-0.053	TRUE	-0.358	0.01	TRUE	-0.286	-0.02	TRUE	-0.239	0.005	TRUE	-0.171	0.052	TRUE
659	BMPR2	-0.325	0.078	FALSE	-0.227	0.022	FALSE	-0.176	0.031	FALSE	-0.114	0.011	FALSE	-0.048	0.059	FALSE
9790	BMS1	-0.849	-0.257	TRUE	-0.806	-0.229	TRUE	-0.756	-0.216	TRUE	-0.713	-0.201	TRUE	-0.624	-0.237	TRUE
154743	BMT2	-0.268	-0.059	FALSE	-0.19	-0.17	FALSE	-0.137	-0.197	FALSE	-0.088	-0.335	FALSE	-0.013	-0.543	FALSE
660	BMX	-0.362	0.129	FALSE	-0.279	0.189	FALSE	-0.242	0.253	FALSE	-0.176	0.289	FALSE	-0.086	0.176	FALSE
646	BNC1	-0.389	-0.065	FALSE	-0.288	-0.075	FALSE	-0.241	-0.05	FALSE	-0.162	-0.078	FALSE	-0.104	-0.005	FALSE
54796	BNC2	-0.326	0.108	FALSE	-0.261	0.141	FALSE	-0.203	0.131	FALSE	-0.147	0.183	FALSE	-0.066	0.099	FALSE
662	BNIP1	-0.347	-0.08	FALSE	-0.315	-0.022	FALSE	-0.269	-0.012	FALSE	-0.218	-0.044	FALSE	-0.138	-0.042	FALSE
663	BNIP2	-0.271	0.048	FALSE	-0.238	0.125	FALSE	-0.162	0.163	FALSE	-0.107	0.208	FALSE	-0.055	0.325	FALSE
664	BNIP3	-0.367	-0.02	FALSE	-0.342	0.013	FALSE	-0.293	0.007	FALSE	-0.245	-0.002	FALSE	-0.167	0.055	FALSE
149428	BNIPL	-0.367	0.057	FALSE	-0.277	0.062	FALSE	-0.226	0.087	FALSE	-0.178	-0.002	FALSE	-0.108	-0.031	FALSE
91653	BOC	-0.234	0.042	FALSE	-0.161	0.05	FALSE	-0.14	0.055	FALSE	-0.092	0.106	FALSE	-0.04	0.159	FALSE
666	BOK	-0.232	-0.067	FALSE	-0.169	-0.03	FALSE	-0.134	-0.034	FALSE	-0.097	-0.005	FALSE	-0.04	0.1	FALSE
51027	BOLA1	-0.224	0.138	FALSE	-0.206	0.102	FALSE	-0.167	0.029	FALSE	-0.131	0.009	FALSE	-0.085	0.007	FALSE
388962	BOLA3	-0.444	0.147	TRUE	-0.367	0.224	TRUE	-0.253	0.082	TRUE	-0.181	0.094	TRUE	-0.059	-0.331	TRUE
66037	BOLL	-0.284	-0.034	FALSE	-0.198	-0.03	FALSE	-0.148	-0.019	FALSE	-0.098	-0.088	FALSE	-0.035	-0.282	FALSE
23246	BOP1	-1.438	-0.1	TRUE	-1.309	-0.075	TRUE	-1.208	-0.107	TRUE	-1.107	-0.1	TRUE	-0.981	-0.093	TRUE
79866	BORA	-0.74	0.018	TRUE	-0.676	0.107	TRUE	-0.591	0.112	TRUE	-0.559	0.221	TRUE	-0.466	0.575	TRUE
118426	BORCS5	-0.351	-0.292	FALSE	-0.306	-0.34	FALSE	-0.268	-0.365	FALSE	-0.226	-0.399	FALSE	-0.167	-0.475	FALSE
119032	BORCS7	-0.28	0.051	FALSE	-0.206	0.08	FALSE	-0.167	0.084	FALSE	-0.141	0.064	FALSE	-0.1	0.087	FALSE
669	BPGM	-0.156	0.204	FALSE	-0.131	0.241	FALSE	-0.095	0.266	FALSE	-0.048	0.333	FALSE	0.028	0.352	FALSE
670	BPHL	-0.309	-0.006	FALSE	-0.282	0.01	FALSE	-0.213	-0.146	FALSE	-0.161	-0.175	FALSE	-0.093	-0.254	FALSE
671	BPI	-0.223	-0.031	FALSE	-0.14	-0.109	FALSE	-0.098	-0.143	FALSE	-0.061	-0.179	FALSE	-0.017	-0.478	FALSE
51297	BPIFA1	-0.164	-0.184	FALSE	-0.07	-0.229	FALSE	-0.048	-0.269	FALSE	-0.02	-0.293	FALSE	0.002	-0.388	FALSE
140683	BPIFA2	-0.196	-0.065	FALSE	-0.143	-0.079	FALSE	-0.103	-0.113	FALSE	-0.038	-0.306	FALSE	0.01	-0.523	FALSE
128861	BPIFA3	-0.513	-0.224	TRUE	-0.469	-0.167	TRUE	-0.35	-0.208	TRUE	-0.266	-0.209	TRUE	-0.167	-0.129	TRUE
92747	BPIFB1	-0.596	-0.15	TRUE	-0.533	-0.069	TRUE	-0.478	0.013	TRUE	-0.382	0.085	TRUE	-0.278	0.492	TRUE
359710	BPIFB3	-0.339	0.016	FALSE	-0.277	-0.02	FALSE	-0.212	-0.02	FALSE	-0.159	-0.124	FALSE	-0.098	-0.344	FALSE
128859	BPIFB6	-0.347	0.082	FALSE	-0.214	0.048	FALSE	-0.163	0.036	FALSE	-0.084	-0.018	FALSE	-0.042	-0.183	FALSE
254240	BPIFC	-0.167	-0.21	FALSE	-0.124	-0.197	FALSE	-0.082	-0.293	FALSE	-0.051	-0.34	FALSE	-0.025	-0.49	FALSE
10380	BPNT1	-0.438	0.076	TRUE	-0.325	0.042	TRUE	-0.267	0.047	TRUE	-0.207	-0.002	TRUE	-0.128	0.044	TRUE
2186	BPTF	-0.782	0	TRUE	-0.734	0.072	TRUE	-0.693	0.113	TRUE	-0.619	0.181	TRUE	-0.451	0.247	TRUE
673	BRAF	-1.254	0.377	TRUE	-1.137	0.506	TRUE	-0.723	0.482	TRUE	-0.249	0.152	TRUE	-0.108	0.012	TRUE
8315	BRAP	-0.529	0.058	TRUE	-0.374	-0.003	TRUE	-0.325	0.028	TRUE	-0.251	0.08	TRUE	-0.129	-0.035	TRUE
672	BRCA1	-0.752	0.024	TRUE	-0.61	0.009	TRUE	-0.535	0.047	TRUE	-0.462	-0.009	TRUE	-0.365	0.07	TRUE
675	BRCA2	-0.618	-0.15	TRUE	-0.573	-0.177	TRUE	-0.521	-0.168	TRUE	-0.473	-0.142	TRUE	-0.389	-0.14	TRUE
79184	BRCC3	-0.245	-0.056	FALSE	-0.203	0.013	FALSE	-0.121	-0.114	FALSE	-0.098	-0.119	FALSE	-0.038	-0.054	FALSE
23774	BRD1	-0.458	0.143	TRUE	-0.335	0.125	TRUE	-0.298	0.193	TRUE	-0.228	0.167	TRUE	-0.157	0.223	TRUE
6046	BRD2	-0.629	0.165	TRUE	-0.525	0.15	TRUE	-0.485	0.209	TRUE	-0.423	0.235	TRUE	-0.307	0.306	TRUE
8019	BRD3	-0.217	0.017	FALSE	-0.172	0.05	FALSE	-0.142	0.091	FALSE	-0.097	0.126	FALSE	-0.013	0.129	FALSE
23476	BRD4	-1.256	0.031	TRUE	-1.129	0.033	TRUE	-1.083	-0.018	TRUE	-0.999	-0.023	TRUE	-0.848	-0.051	TRUE
29117	BRD7	-0.607	0.096	TRUE	-0.511	0.001	TRUE	-0.443	0	TRUE	-0.343	-0.044	TRUE	-0.245	0.047	TRUE
10902	BRD8	-0.438	0.004	TRUE	-0.387	0.006	TRUE	-0.343	0.01	TRUE	-0.287	0.03	TRUE	-0.198	0.031	TRUE
65980	BRD9	-0.403	0.154	FALSE	-0.317	0.174	FALSE	-0.235	0.092	FALSE	-0.169	0.096	FALSE	-0.074	0.087	FALSE
676	BRDT	-0.294	-0.199	FALSE	-0.247	-0.175	FALSE	-0.205	-0.204	FALSE	-0.175	-0.193	FALSE	-0.119	-0.146	FALSE
2972	BRF1	-0.7	-0.141	TRUE	-0.628	-0.161	TRUE	-0.583	-0.208	TRUE	-0.528	-0.208	TRUE	-0.444	-0.221	TRUE
55290	BRF2	-0.887	0.125	TRUE	-0.84	0.17	TRUE	-0.798	0.17	TRUE	-0.733	0.27	TRUE	-0.529	0.389	TRUE
25798	BRI3	-0.386	-0.001	FALSE	-0.34	0.063	FALSE	-0.29	0.061	FALSE	-0.219	0.108	FALSE	-0.133	0.145	FALSE
57795	BRINP2	-0.18	-0.096	FALSE	-0.147	-0.031	FALSE	-0.117	-0.025	FALSE	-0.083	-0.071	FALSE	-0.051	-0.213	FALSE
339479	BRINP3	-0.307	-0.113	FALSE	-0.262	-0.206	FALSE	-0.203	-0.263	FALSE	-0.15	-0.354	FALSE	-0.072	-0.516	FALSE
83990	BRIP1	-0.419	-0.147	FALSE	-0.368	-0.113	FALSE	-0.313	-0.142	FALSE	-0.247	-0.157	FALSE	-0.167	-0.11	FALSE
55299	BRIX1	-0.992	-0.165	TRUE	-0.874	-0.16	TRUE	-0.821	-0.16	TRUE	-0.757	-0.138	TRUE	-0.629	-0.139	TRUE
55845	BRK1	-0.52	-0.061	TRUE	-0.445	-0.064	TRUE	-0.408	-0.066	TRUE	-0.361	0.022	TRUE	-0.267	-0.074	TRUE
25855	BRMS1	-0.539	0.139	TRUE	-0.469	0.174	TRUE	-0.39	0.156	TRUE	-0.324	0.145	TRUE	-0.231	0.165	TRUE
84312	BRMS1L	-0.449	-0.161	TRUE	-0.376	-0.146	TRUE	-0.32	-0.147	TRUE	-0.263	-0.167	TRUE	-0.182	-0.118	TRUE
148362	BROX	-0.079	-0.061	FALSE	-0.046	-0.095	FALSE	-0.029	-0.093	FALSE	-0.012	-0.057	FALSE	0.005	0.107	FALSE
7862	BRPF1	-0.423	-0.157	FALSE	-0.368	-0.117	FALSE	-0.333	-0.071	FALSE	-0.269	-0.063	FALSE	-0.187	-0.051	FALSE
27154	BRPF3	-0.269	-0.161	FALSE	-0.233	-0.134	FALSE	-0.2	-0.123	FALSE	-0.15	-0.103	FALSE	-0.093	-0.083	FALSE
680	BRS3	-0.351	0.122	FALSE	-0.233	0.044	FALSE	-0.201	0.008	FALSE	-0.168	0.027	FALSE	-0.104	0.087	FALSE
84446	BRSK1	-0.193	0.051	FALSE	-0.13	0.045	FALSE	-0.057	-0.005	FALSE	-0.024	-0.006	FALSE	0.026	0.165	FALSE
9024	BRSK2	-0.526	-0.103	TRUE	-0.442	-0.075	TRUE	-0.412	-0.026	TRUE	-0.366	-0.027	TRUE	-0.268	0.014	TRUE
54014	BRWD1	-0.279	-0.04	FALSE	-0.206	-0.041	FALSE	-0.171	-0.096	FALSE	-0.126	-0.091	FALSE	-0.075	-0.066	FALSE
254065	BRWD3	-0.419	0.006	FALSE	-0.338	-0.014	FALSE	-0.288	0.022	FALSE	-0.207	-0.018	FALSE	-0.129	0.041	FALSE
26580	BSCL2	-0.402	0.047	FALSE	-0.262	-0.041	FALSE	-0.214	-0.11	FALSE	-0.178	-0.289	FALSE	-0.122	-0.467	FALSE
55108	BSDC1	-0.366	-0.168	FALSE	-0.301	-0.214	FALSE	-0.264	-0.193	FALSE	-0.206	-0.279	FALSE	-0.114	-0.36	FALSE
682	BSG	-0.449	0.033	TRUE	-0.378	0.049	TRUE	-0.326	0.028	TRUE	-0.263	0.042	TRUE	-0.18	0.152	TRUE
8927	BSN	-0.483	-0.074	TRUE	-0.401	-0.093	TRUE	-0.317	-0.146	TRUE	-0.248	-0.148	TRUE	-0.13	-0.159	TRUE
7809	BSND	-0.246	-0.094	FALSE	-0.208	-0.026	FALSE	-0.143	-0.002	FALSE	-0.111	0.044	FALSE	-0.06	0.101	FALSE
54836	BSPRY	-0.259	-0.044	FALSE	-0.226	0.007	FALSE	-0.185	-0.065	FALSE	-0.13	-0.135	FALSE	-0.058	-0.552	FALSE
683	BST1	-0.245	0.187	FALSE	-0.186	0.205	FALSE	-0.145	0.25	FALSE	-0.081	0.258	FALSE	-0.004	0.213	FALSE
684	BST2	-0.423	0.233	FALSE	-0.372	0.287	FALSE	-0.286	0.32	FALSE	-0.225	0.395	FALSE	-0.105	0.187	FALSE
9044	BTAF1	-0.487	-0.003	TRUE	-0.389	0.012	TRUE	-0.337	0.031	TRUE	-0.278	0.025	TRUE	-0.182	0.062	TRUE
53339	BTBD1	-0.182	0.088	FALSE	-0.156	0.039	FALSE	-0.108	0.045	FALSE	-0.081	0.108	FALSE	-0.032	0.237	FALSE
84280	BTBD10	-0.155	0.318	FALSE	-0.115	0.376	FALSE	-0.1	0.438	FALSE	-0.071	0.646	FALSE	-0.048	0.943	FALSE
121551	BTBD11	-0.351	-0.105	FALSE	-0.278	-0.079	FALSE	-0.224	-0.055	FALSE	-0.18	-0.09	FALSE	-0.124	-0.092	FALSE
118663	BTBD16	-0.327	-0.096	FALSE	-0.251	-0.156	FALSE	-0.215	-0.225	FALSE	-0.158	-0.274	FALSE	-0.06	-0.414	FALSE
388419	BTBD17	-0.307	-0.229	FALSE	-0.266	-0.238	FALSE	-0.244	-0.24	FALSE	-0.184	-0.305	FALSE	-0.134	-0.389	FALSE
643376	BTBD18	-0.422	-0.009	FALSE	-0.269	-0.192	FALSE	-0.193	-0.279	FALSE	-0.156	-0.288	FALSE	-0.078	-0.381	FALSE
55643	BTBD2	-0.283	-0.207	FALSE	-0.224	-0.19	FALSE	-0.195	-0.108	FALSE	-0.151	-0.14	FALSE	-0.061	-0.219	FALSE
22903	BTBD3	-0.241	-0.155	FALSE	-0.193	-0.109	FALSE	-0.123	-0.145	FALSE	-0.09	-0.138	FALSE	-0.036	-0.129	FALSE
90135	BTBD6	-0.499	-0.094	TRUE	-0.453	-0.079	TRUE	-0.396	-0.054	TRUE	-0.339	-0.094	TRUE	-0.26	-0.096	TRUE
55727	BTBD7	-0.556	0.169	TRUE	-0.505	0.151	TRUE	-0.421	0.141	TRUE	-0.322	0.143	TRUE	-0.209	0.196	TRUE
284697	BTBD8	-0.277	-0.057	FALSE	-0.221	-0.059	FALSE	-0.168	-0.121	FALSE	-0.11	-0.198	FALSE	-0.055	-0.25	FALSE
114781	BTBD9	-0.392	-0.09	FALSE	-0.355	-0.062	FALSE	-0.314	-0.009	FALSE	-0.269	-0.019	FALSE	-0.165	-0.168	FALSE
685	BTC	-0.207	-0.12	FALSE	-0.159	-0.098	FALSE	-0.105	-0.194	FALSE	-0.072	-0.258	FALSE	-0.025	-0.397	FALSE
686	BTD	-0.506	0.03	TRUE	-0.44	0.067	TRUE	-0.395	0.11	TRUE	-0.319	0.084	TRUE	-0.225	0.128	TRUE
689	BTF3	-1.076	-0.009	TRUE	-0.94	-0.027	TRUE	-0.891	0.024	TRUE	-0.826	0.033	TRUE	-0.694	-0.034	TRUE
91408	BTF3L4	-0.587	0.142	TRUE	-0.545	0.24	TRUE	-0.446	0.222	TRUE	-0.388	0.28	TRUE	-0.275	0.384	TRUE
694	BTG1	-0.246	0.028	FALSE	-0.228	0.035	FALSE	-0.198	0.068	FALSE	-0.152	0.11	FALSE	-0.068	0.131	FALSE
7832	BTG2	-0.459	0.017	TRUE	-0.358	0.034	TRUE	-0.292	0.039	TRUE	-0.229	0.032	TRUE	-0.14	-0.017	TRUE
10950	BTG3	-0.221	-0.192	FALSE	-0.155	-0.261	FALSE	-0.105	-0.254	FALSE	-0.069	-0.351	FALSE	-0.027	-0.543	FALSE
54766	BTG4	-0.065	-0.013	FALSE	-0.05	0.062	FALSE	-0.038	0.059	FALSE	-0.024	0.176	FALSE	-0.005	0.156	FALSE
695	BTK	-0.43	0.22	TRUE	-0.362	0.274	TRUE	-0.287	0.262	TRUE	-0.209	0.295	TRUE	-0.112	0.298	TRUE
151888	BTLA	-0.411	-0.102	FALSE	-0.34	-0.157	FALSE	-0.279	-0.141	FALSE	-0.212	-0.127	FALSE	-0.108	-0.076	FALSE
696	BTN1A1	-0.345	0.025	FALSE	-0.298	0.048	FALSE	-0.26	-0.029	FALSE	-0.208	-0.002	FALSE	-0.136	0.011	FALSE
11120	BTN2A1	-0.277	0.134	FALSE	-0.248	0.065	FALSE	-0.199	0.118	FALSE	-0.14	0.211	FALSE	-0.052	0.043	FALSE
10385	BTN2A2	-0.185	0.051	FALSE	-0.141	-0.047	FALSE	-0.101	-0.028	FALSE	-0.058	-0.147	FALSE	-0.009	-0.199	FALSE
11119	BTN3A1	-0.194	-0.015	FALSE	-0.084	-0.082	FALSE	-0.043	-0.112	FALSE	-0.018	-0.117	FALSE	0.01	-0.042	FALSE
11118	BTN3A2	-0.281	0.184	FALSE	-0.245	0.195	FALSE	-0.195	0.205	FALSE	-0.12	0.182	FALSE	-0.043	0.229	FALSE
10384	BTN3A3	-0.228	0.103	FALSE	-0.202	0.158	FALSE	-0.156	0.167	FALSE	-0.098	0.248	FALSE	-0.016	0.274	FALSE
10917	BTNL3	-0.257	0	FALSE	-0.199	-0.003	FALSE	-0.161	-0.014	FALSE	-0.122	-0.011	FALSE	-0.055	-0.011	FALSE
79908	BTNL8	-0.474	-0.101	TRUE	-0.425	-0.1	TRUE	-0.349	-0.147	TRUE	-0.314	-0.098	TRUE	-0.225	0.05	TRUE
153579	BTNL9	-0.372	0.061	FALSE	-0.273	0.046	FALSE	-0.206	-0.034	FALSE	-0.16	-0.044	FALSE	-0.079	-0.118	FALSE
8945	BTRC	-0.496	0.176	TRUE	-0.462	0.223	TRUE	-0.38	0.226	TRUE	-0.33	0.302	TRUE	-0.213	0.34	TRUE
699	BUB1	-0.94	0.067	TRUE	-0.808	0.098	TRUE	-0.75	0.127	TRUE	-0.661	0.137	TRUE	-0.51	0.038	TRUE
701	BUB1B	-2.034	0.069	TRUE	-1.746	0.016	TRUE	-1.581	-0.025	TRUE	-1.416	-0.068	TRUE	-1.2	-0.209	TRUE
9184	BUB3	-1.368	-0.11	TRUE	-1.262	-0.065	TRUE	-1.193	-0.103	TRUE	-1.126	-0.095	TRUE	-0.997	-0.11	TRUE
84811	BUD13	-0.841	0.086	TRUE	-0.777	0.155	TRUE	-0.655	0.125	TRUE	-0.54	0.138	TRUE	-0.408	0.178	TRUE
114049	BUD23	-0.991	-0.094	TRUE	-0.902	-0.073	TRUE	-0.803	-0.073	TRUE	-0.754	-0.026	TRUE	-0.633	-0.04	TRUE
8896	BUD31	-1.489	-0.177	TRUE	-1.393	-0.161	TRUE	-1.339	-0.133	TRUE	-1.241	-0.17	TRUE	-1.106	-0.149	TRUE
11149	BVES	-0.283	-0.02	FALSE	-0.188	-0.025	FALSE	-0.12	-0.137	FALSE	-0.088	-0.138	FALSE	-0.042	-0.318	FALSE
705	BYSL	-0.903	0.048	TRUE	-0.83	0.051	TRUE	-0.756	0.066	TRUE	-0.7	0.133	TRUE	-0.622	-0.008	TRUE
9689	BZW1	-0.34	0.05	FALSE	-0.239	0.034	FALSE	-0.208	-0.014	FALSE	-0.137	-0.135	FALSE	-0.049	-0.409	FALSE
28969	BZW2	-0.24	0.348	FALSE	-0.138	0.267	FALSE	-0.073	0.27	FALSE	-0.036	0.227	FALSE	-0.007	0.059	FALSE
387638	C10orf113	-0.668	0.056	TRUE	-0.487	0.02	TRUE	-0.409	0.074	TRUE	-0.311	0.143	TRUE	-0.169	0.397	TRUE
399814	C10orf120	-0.293	-0.094	FALSE	-0.258	-0.093	FALSE	-0.206	-0.125	FALSE	-0.126	-0.247	FALSE	-0.048	-0.409	FALSE
282966	C10orf53	-0.182	-0.044	FALSE	-0.142	-0.065	FALSE	-0.121	-0.019	FALSE	-0.097	0.026	FALSE	-0.061	-0.072	FALSE
118461	C10orf71	-0.161	0.154	FALSE	-0.06	0.188	FALSE	-0.025	0.274	FALSE	0.025	0.2	FALSE	0.049	0.22	FALSE
387695	C10orf99	-0.185	-0.185	FALSE	-0.132	-0.325	FALSE	-0.106	-0.364	FALSE	-0.067	-0.469	FALSE	-0.036	-0.56	FALSE
56673	C11orf16	-0.217	-0.122	FALSE	-0.178	-0.093	FALSE	-0.129	-0.209	FALSE	-0.077	-0.303	FALSE	-0.021	-0.519	FALSE
53838	C11orf24	-0.477	0.033	TRUE	-0.395	0.093	TRUE	-0.344	0.081	TRUE	-0.277	0.088	TRUE	-0.183	0.026	TRUE
143501	C11orf40	-0.365	-0.223	FALSE	-0.291	-0.301	FALSE	-0.263	-0.277	FALSE	-0.207	-0.294	FALSE	-0.12	-0.284	FALSE
160298	C11orf42	-0.281	-0.055	FALSE	-0.21	-0.143	FALSE	-0.177	-0.137	FALSE	-0.118	-0.198	FALSE	-0.043	-0.51	FALSE
219833	C11orf45	-0.425	0.309	TRUE	-0.316	0.226	TRUE	-0.239	0.272	TRUE	-0.179	0.31	TRUE	-0.077	0.13	TRUE
79096	C11orf49	-0.532	0.177	TRUE	-0.47	0.176	TRUE	-0.394	0.159	TRUE	-0.277	0.022	TRUE	-0.084	-0.395	TRUE
10944	C11orf58	-0.208	-0.256	FALSE	-0.162	-0.246	FALSE	-0.118	-0.316	FALSE	-0.091	-0.308	FALSE	-0.06	-0.425	FALSE
54494	C11orf71	-0.475	0.197	TRUE	-0.388	0.25	TRUE	-0.284	0.246	TRUE	-0.213	0.216	TRUE	-0.11	0.221	TRUE
119710	C11orf74	-0.182	0.134	FALSE	-0.11	0.2	FALSE	-0.075	0.18	FALSE	-0.035	0.289	FALSE	-0.003	0.264	FALSE
79703	C11orf80	-0.266	-0.062	FALSE	-0.214	-0.074	FALSE	-0.171	-0.127	FALSE	-0.117	-0.171	FALSE	-0.067	-0.376	FALSE
60314	C12orf10	-0.248	-0.165	FALSE	-0.221	-0.091	FALSE	-0.196	-0.077	FALSE	-0.155	-0.071	FALSE	-0.12	-0.002	FALSE
57102	C12orf4	-0.122	-0.045	FALSE	-0.063	-0.111	FALSE	-0.05	-0.113	FALSE	-0.033	-0.11	FALSE	-0.016	-0.1	FALSE
283461	C12orf40	-0.212	-0.164	FALSE	-0.134	-0.216	FALSE	-0.09	-0.217	FALSE	-0.04	-0.302	FALSE	0.014	-0.549	FALSE
64897	C12orf43	-0.276	-0.271	FALSE	-0.135	-0.556	FALSE	-0.089	-0.664	FALSE	-0.065	-0.717	FALSE	-0.045	-0.754	FALSE
121053	C12orf45	-0.881	-0.032	TRUE	-0.714	-0.062	TRUE	-0.665	-0.033	TRUE	-0.524	-0.093	TRUE	-0.379	-0.198	TRUE
79794	C12orf49	-0.441	0.119	TRUE	-0.34	0.102	TRUE	-0.283	0.06	TRUE	-0.205	0.083	TRUE	-0.12	0.039	TRUE
121273	C12orf54	-0.19	-0.022	FALSE	-0.114	-0.061	FALSE	-0.08	-0.045	FALSE	-0.04	-0.062	FALSE	-0.013	-0.232	FALSE
144608	C12orf60	-0.306	0.057	FALSE	-0.184	0	FALSE	-0.112	-0.035	FALSE	-0.056	-0.167	FALSE	-0.014	-0.382	FALSE
144577	C12orf66	-0.263	0.029	FALSE	-0.184	0.016	FALSE	-0.131	0.01	FALSE	-0.085	-0.058	FALSE	-0.016	-0.269	FALSE
55017	C14orf119	-0.407	-0.052	FALSE	-0.318	-0.032	FALSE	-0.237	-0.087	FALSE	-0.153	-0.201	FALSE	-0.071	-0.482	FALSE
122525	C14orf28	-0.264	-0.095	FALSE	-0.21	-0.099	FALSE	-0.152	-0.11	FALSE	-0.111	-0.169	FALSE	-0.066	-0.442	FALSE
317761	C14orf39	-0.204	-0.12	FALSE	-0.183	-0.097	FALSE	-0.142	-0.084	FALSE	-0.096	-0.151	FALSE	-0.022	-0.278	FALSE
60686	C14orf93	-0.282	-0.017	FALSE	-0.214	-0.035	FALSE	-0.176	0.019	FALSE	-0.116	-0.079	FALSE	-0.047	-0.223	FALSE
56905	C15orf39	-0.233	0.014	FALSE	-0.157	0.027	FALSE	-0.122	0.083	FALSE	-0.083	0.089	FALSE	-0.05	-0.052	FALSE
84419	C15orf48	-0.286	0.124	FALSE	-0.196	0.086	FALSE	-0.14	0.015	FALSE	-0.061	-0.176	FALSE	-0.022	-0.527	FALSE
145853	C15orf61	-0.317	-0.068	FALSE	-0.25	-0.05	FALSE	-0.158	-0.18	FALSE	-0.114	-0.214	FALSE	-0.021	-0.406	FALSE
145788	C15orf65	-0.32	0.022	FALSE	-0.239	-0.074	FALSE	-0.175	-0.095	FALSE	-0.103	-0.166	FALSE	-0.026	-0.386	FALSE
89927	BMERB1	-0.134	-0.074	FALSE	-0.077	-0.042	FALSE	-0.06	0.008	FALSE	-0.046	0.075	FALSE	-0.026	0.219	FALSE
123775	C16orf46	-0.32	-0.178	FALSE	-0.279	-0.211	FALSE	-0.232	-0.262	FALSE	-0.183	-0.361	FALSE	-0.123	-0.451	FALSE
64755	C16orf58	-0.268	0.165	FALSE	-0.166	0.075	FALSE	-0.111	-0.039	FALSE	-0.056	-0.175	FALSE	-0.007	-0.406	FALSE
146562	C16orf71	-0.587	0.106	TRUE	-0.521	0.1	TRUE	-0.413	0.055	TRUE	-0.292	-0.017	TRUE	-0.169	0.141	TRUE
123970	C16orf78	-0.267	-0.08	FALSE	-0.223	-0.014	FALSE	-0.141	-0.044	FALSE	-0.081	-0.16	FALSE	-0.017	-0.518	FALSE
388272	C16orf87	-0.43	-0.356	TRUE	-0.405	-0.291	TRUE	-0.377	-0.232	TRUE	-0.324	-0.201	TRUE	-0.267	-0.171	TRUE
146556	C16orf89	-0.411	-0.274	FALSE	-0.359	-0.27	FALSE	-0.309	-0.269	FALSE	-0.236	-0.289	FALSE	-0.159	-0.231	FALSE
339263	LINC02693	-0.156	-0.108	FALSE	-0.116	-0.138	FALSE	-0.077	-0.112	FALSE	-0.059	-0.058	FALSE	-0.021	0.07	FALSE
284018	C17orf58	-0.374	-0.15	FALSE	-0.342	-0.083	FALSE	-0.297	-0.1	FALSE	-0.247	-0.109	FALSE	-0.183	-0.116	FALSE
124773	C17orf64	-0.163	0.058	FALSE	-0.094	-0.086	FALSE	-0.07	-0.069	FALSE	-0.03	-0.183	FALSE	0.011	-0.418	FALSE
64149	C17orf75	-0.283	-0.06	FALSE	-0.253	-0.009	FALSE	-0.211	-0.077	FALSE	-0.173	-0.07	FALSE	-0.114	-0.064	FALSE
284099	C17orf78	-0.163	0.109	FALSE	-0.112	0.114	FALSE	-0.051	0.092	FALSE	-0.025	0.122	FALSE	-0.001	0.06	FALSE
55028	C17orf80	-0.169	-0.151	FALSE	-0.11	-0.166	FALSE	-0.074	-0.138	FALSE	-0.045	-0.177	FALSE	-0.008	-0.177	FALSE
100141515	C17orf99	-0.481	0.055	TRUE	-0.374	0.057	TRUE	-0.277	-0.013	TRUE	-0.199	-0.022	TRUE	-0.095	-0.096	TRUE
147339	C18orf25	-0.378	-0.111	FALSE	-0.331	-0.043	FALSE	-0.242	-0.119	FALSE	-0.155	-0.18	FALSE	-0.054	-0.416	FALSE
83636	C19orf12	-0.344	-0.164	FALSE	-0.273	-0.184	FALSE	-0.222	-0.18	FALSE	-0.183	-0.197	FALSE	-0.106	-0.149	FALSE
147685	C19orf18	-0.386	-0.043	FALSE	-0.288	-0.055	FALSE	-0.229	-0.089	FALSE	-0.149	-0.256	FALSE	-0.057	-0.417	FALSE
28974	C19orf53	-0.644	-0.181	TRUE	-0.595	-0.161	TRUE	-0.549	-0.116	TRUE	-0.487	-0.093	TRUE	-0.4	-0.062	TRUE
10438	C1D	-0.58	-0.202	TRUE	-0.503	-0.212	TRUE	-0.464	-0.187	TRUE	-0.393	-0.172	TRUE	-0.312	-0.133	TRUE
56913	C1GALT1	-0.458	0.028	TRUE	-0.396	-0.009	TRUE	-0.348	-0.013	TRUE	-0.268	-0.072	TRUE	-0.175	0.063	TRUE
29071	C1GALT1C1	-0.443	0.041	TRUE	-0.393	0.031	TRUE	-0.311	-0.015	TRUE	-0.23	-0.023	TRUE	-0.14	0.089	TRUE
712	C1QA	-0.373	0.081	FALSE	-0.265	0.071	FALSE	-0.221	0.098	FALSE	-0.161	0.093	FALSE	-0.078	0.036	FALSE
713	C1QB	-0.436	0.003	TRUE	-0.371	0.071	TRUE	-0.291	0.069	TRUE	-0.24	0.104	TRUE	-0.157	0.097	TRUE
708	C1QBP	-0.609	-0.132	TRUE	-0.552	-0.175	TRUE	-0.515	-0.172	TRUE	-0.452	-0.222	TRUE	-0.358	-0.248	TRUE
714	C1QC	-0.423	0.027	FALSE	-0.353	0.095	FALSE	-0.286	0.03	FALSE	-0.235	0.022	FALSE	-0.155	0.103	FALSE
10882	C1QL1	-0.296	-0.197	FALSE	-0.229	-0.227	FALSE	-0.196	-0.215	FALSE	-0.157	-0.213	FALSE	-0.093	-0.248	FALSE
165257	C1QL2	-0.177	0.048	FALSE	-0.141	0.044	FALSE	-0.079	0.021	FALSE	-0.032	0.017	FALSE	0.011	0.144	FALSE
389941	C1QL3	-0.286	-0.063	FALSE	-0.22	-0.02	FALSE	-0.169	-0.006	FALSE	-0.119	-0.044	FALSE	-0.04	-0.137	FALSE
338761	C1QL4	-0.389	-0.167	FALSE	-0.344	-0.126	FALSE	-0.286	-0.161	FALSE	-0.209	-0.201	FALSE	-0.111	-0.19	FALSE
114897	C1QTNF1	-0.473	-0.061	TRUE	-0.421	-0.034	TRUE	-0.366	-0.054	TRUE	-0.318	-0.033	TRUE	-0.219	-0.1	TRUE
388581	C1QTNF12	-0.389	-0.177	FALSE	-0.276	-0.278	FALSE	-0.243	-0.243	FALSE	-0.19	-0.28	FALSE	-0.119	-0.204	FALSE
114898	C1QTNF2	-0.367	-0.123	FALSE	-0.324	-0.109	FALSE	-0.275	-0.109	FALSE	-0.207	-0.137	FALSE	-0.121	-0.161	FALSE
114899	C1QTNF3	-0.156	0.008	FALSE	-0.106	0.03	FALSE	-0.061	0.03	FALSE	-0.037	0.105	FALSE	0.007	0.318	FALSE
114904	C1QTNF6	-0.526	0.011	TRUE	-0.421	-0.029	TRUE	-0.358	-0.025	TRUE	-0.295	-0.055	TRUE	-0.184	-0.082	TRUE
114905	C1QTNF7	-0.259	-0.164	FALSE	-0.222	-0.167	FALSE	-0.179	-0.145	FALSE	-0.11	-0.188	FALSE	-0.052	-0.249	FALSE
390664	C1QTNF8	-0.359	0.22	FALSE	-0.222	-0.044	FALSE	-0.154	-0.12	FALSE	-0.115	-0.079	FALSE	-0.049	-0.1	FALSE
338872	C1QTNF9	-0.416	-0.033	FALSE	-0.363	-0.031	FALSE	-0.296	-0.073	FALSE	-0.243	-0.05	FALSE	-0.162	-0.059	FALSE
387911	C1QTNF9B	-0.4	0.081	FALSE	-0.364	0.076	FALSE	-0.303	0.108	FALSE	-0.238	0.018	FALSE	-0.161	0.046	FALSE
51279	C1RL	-0.217	0.139	FALSE	-0.171	0.236	FALSE	-0.136	0.186	FALSE	-0.088	0.159	FALSE	-0.012	0.123	FALSE
716	C1S	-0.483	0.115	TRUE	-0.387	0.014	TRUE	-0.313	-0.019	TRUE	-0.264	-0.036	TRUE	-0.167	-0.099	TRUE
200159	C1orf100	-0.314	0.154	FALSE	-0.237	0.111	FALSE	-0.18	0.049	FALSE	-0.153	0.048	FALSE	-0.115	0.02	FALSE
92346	C1orf105	-0.163	0.2	FALSE	-0.12	0.254	FALSE	-0.098	0.313	FALSE	-0.073	0.429	FALSE	-0.049	0.675	FALSE
54955	C1orf109	-1.223	0.034	TRUE	-1.187	0.12	TRUE	-1.108	0.089	TRUE	-1.052	0.166	TRUE	-0.927	0.353	TRUE
79762	C1orf115	-0.162	0.094	FALSE	-0.116	-0.094	FALSE	-0.075	-0.125	FALSE	-0.039	-0.156	FALSE	-0.011	-0.249	FALSE
79098	C1orf116	-0.545	0.265	TRUE	-0.466	0.323	TRUE	-0.385	0.334	TRUE	-0.298	0.311	TRUE	-0.185	0.185	TRUE
127687	C1orf122	-0.2	-0.015	FALSE	-0.162	0.041	FALSE	-0.117	0.025	FALSE	-0.074	-0.019	FALSE	-0.033	-0.271	FALSE
54987	CZIB	-0.481	-0.179	TRUE	-0.442	-0.199	TRUE	-0.38	-0.209	TRUE	-0.311	-0.185	TRUE	-0.212	-0.076	TRUE
128061	C1orf131	-0.574	-0.281	TRUE	-0.506	-0.237	TRUE	-0.46	-0.188	TRUE	-0.402	-0.153	TRUE	-0.313	-0.049	TRUE
400757	C1orf141	-0.296	-0.068	FALSE	-0.245	-0.02	FALSE	-0.178	-0.055	FALSE	-0.124	-0.075	FALSE	-0.055	-0.145	FALSE
388649	C1orf146	-0.23	-0.059	FALSE	-0.164	-0.086	FALSE	-0.12	-0.146	FALSE	-0.079	-0.241	FALSE	-0.035	-0.568	FALSE
93190	C1orf158	-0.332	-0.079	FALSE	-0.299	-0.058	FALSE	-0.24	-0.148	FALSE	-0.176	-0.191	FALSE	-0.07	-0.407	FALSE
54991	C1orf159	-0.272	-0.265	FALSE	-0.239	-0.271	FALSE	-0.187	-0.285	FALSE	-0.162	-0.325	FALSE	-0.108	-0.433	FALSE
128346	C1orf162	-0.357	-0.188	FALSE	-0.285	-0.2	FALSE	-0.229	-0.279	FALSE	-0.184	-0.321	FALSE	-0.11	-0.369	FALSE
339448	C1orf174	-0.319	-0.084	FALSE	-0.288	-0.025	FALSE	-0.216	-0.049	FALSE	-0.133	-0.234	FALSE	-0.051	-0.453	FALSE
84886	C1orf198	-0.281	-0.157	FALSE	-0.226	-0.194	FALSE	-0.151	-0.23	FALSE	-0.096	-0.315	FALSE	-0.036	-0.538	FALSE
81563	C1orf21	-0.151	-0.27	FALSE	-0.096	-0.488	FALSE	-0.063	-0.66	FALSE	-0.043	-0.726	FALSE	-0.026	-0.745	FALSE
79169	C1orf35	-0.203	-0.053	FALSE	-0.137	-0.118	FALSE	-0.096	-0.132	FALSE	-0.069	-0.141	FALSE	-0.038	-0.201	FALSE
25912	C1orf43	-0.211	-0.097	FALSE	-0.18	-0.096	FALSE	-0.16	-0.038	FALSE	-0.125	-0.057	FALSE	-0.085	-0.212	FALSE
388722	C1orf53	-0.346	-0.102	FALSE	-0.264	-0.111	FALSE	-0.214	-0.166	FALSE	-0.158	-0.277	FALSE	-0.078	-0.343	FALSE
79630	C1orf54	-0.678	0.027	TRUE	-0.603	0.063	TRUE	-0.52	0.046	TRUE	-0.398	0.072	TRUE	-0.238	0.186	TRUE
54964	C1orf56	-0.262	0	FALSE	-0.237	0.002	FALSE	-0.197	0.007	FALSE	-0.146	0.018	FALSE	-0.082	0.032	FALSE
148304	C1orf74	-0.318	-0.032	FALSE	-0.276	0.014	FALSE	-0.233	0.009	FALSE	-0.196	0.042	FALSE	-0.127	0.084	FALSE
127795	C1orf87	-0.196	-0.113	FALSE	-0.168	-0.117	FALSE	-0.133	-0.144	FALSE	-0.094	-0.138	FALSE	-0.04	-0.114	FALSE
717	C2	-0.272	-0.203	FALSE	-0.249	-0.141	FALSE	-0.221	-0.139	FALSE	-0.186	-0.097	FALSE	-0.111	-0.126	FALSE
140873	C20orf173	-0.215	-0.027	FALSE	-0.164	-0.008	FALSE	-0.107	-0.069	FALSE	-0.076	-0.097	FALSE	-0.038	-0.044	FALSE
400831	C20orf202	-0.298	0.182	FALSE	-0.197	0.205	FALSE	-0.132	0.159	FALSE	-0.086	0.084	FALSE	-0.05	-0.238	FALSE
128602	C20orf85	-0.17	-0.007	FALSE	-0.122	0.01	FALSE	-0.093	-0.101	FALSE	-0.054	-0.103	FALSE	-0.024	-0.399	FALSE
54058	C21orf58	-0.251	-0.051	FALSE	-0.189	-0.047	FALSE	-0.132	-0.137	FALSE	-0.097	-0.172	FALSE	-0.069	-0.223	FALSE
56245	C21orf62	-0.594	0.101	TRUE	-0.552	0.151	TRUE	-0.492	0.19	TRUE	-0.379	0.233	TRUE	-0.163	0.195	TRUE
54149	C21orf91	-0.068	0.065	FALSE	-0.042	0.006	FALSE	-0.027	0.071	FALSE	-0.015	0.159	FALSE	0.001	0.455	FALSE
84645	C22orf23	-0.344	0.056	FALSE	-0.29	0.084	FALSE	-0.217	0.072	FALSE	-0.17	0.042	FALSE	-0.097	-0.275	FALSE
25770	C22orf31	-0.278	-0.234	FALSE	-0.238	-0.232	FALSE	-0.2	-0.224	FALSE	-0.145	-0.315	FALSE	-0.048	-0.475	FALSE
79640	C22orf46	-0.186	-0.001	FALSE	-0.141	0.05	FALSE	-0.121	0.096	FALSE	-0.101	0.173	FALSE	-0.065	0.405	FALSE
25966	C2CD2	-0.148	-0.199	FALSE	-0.108	-0.214	FALSE	-0.083	-0.179	FALSE	-0.057	-0.257	FALSE	-0.029	-0.41	FALSE
9854	C2CD2L	-0.396	-0.095	FALSE	-0.317	-0.131	FALSE	-0.257	-0.17	FALSE	-0.197	-0.191	FALSE	-0.096	-0.192	FALSE
9847	C2CD5	-0.294	0.035	FALSE	-0.212	0.006	FALSE	-0.164	0.013	FALSE	-0.113	0.01	FALSE	-0.021	-0.396	FALSE
151254	C2CD6	-0.268	0.116	FALSE	-0.205	0.151	FALSE	-0.132	0.095	FALSE	-0.056	0.011	FALSE	-0.012	-0.243	FALSE
150590	C2orf15	-0.152	-0.123	FALSE	-0.13	-0.133	FALSE	-0.097	-0.15	FALSE	-0.069	-0.187	FALSE	-0.041	-0.297	FALSE
84226	C2orf16	-0.209	-0.15	FALSE	-0.169	-0.146	FALSE	-0.123	-0.172	FALSE	-0.076	-0.236	FALSE	-0.037	-0.549	FALSE
84417	ECRG4	-0.176	-0.1	FALSE	-0.141	-0.065	FALSE	-0.091	-0.113	FALSE	-0.047	-0.187	FALSE	-0.015	-0.357	FALSE
79074	C2orf49	-0.385	0.134	FALSE	-0.326	0.122	FALSE	-0.244	0.146	FALSE	-0.207	0.171	FALSE	-0.114	0.026	FALSE
130813	C2orf50	-0.372	-0.337	FALSE	-0.298	-0.37	FALSE	-0.249	-0.375	FALSE	-0.208	-0.358	FALSE	-0.145	-0.317	FALSE
401027	C2orf66	-0.329	-0.171	FALSE	-0.286	-0.152	FALSE	-0.236	-0.161	FALSE	-0.169	-0.23	FALSE	-0.07	-0.35	FALSE
205327	C2orf69	-0.365	-0.08	FALSE	-0.307	-0.104	FALSE	-0.221	-0.132	FALSE	-0.157	-0.192	FALSE	-0.107	-0.326	FALSE
129852	C2orf73	-0.479	0.168	TRUE	-0.361	0.188	TRUE	-0.303	0.086	TRUE	-0.215	-0.014	TRUE	-0.079	-0.481	TRUE
130355	C2orf76	-0.205	-0.498	FALSE	-0.1	-0.632	FALSE	-0.071	-0.665	FALSE	-0.049	-0.703	FALSE	-0.027	-0.719	FALSE
718	C3	-0.241	-0.162	FALSE	-0.177	-0.189	FALSE	-0.16	-0.185	FALSE	-0.12	-0.138	FALSE	-0.055	-0.167	FALSE
719	C3AR1	-0.406	0.035	FALSE	-0.38	0.033	FALSE	-0.327	0.035	FALSE	-0.272	0.053	FALSE	-0.183	0.014	FALSE
152405	TEX55	-0.245	0.124	FALSE	-0.161	0.045	FALSE	-0.113	0.055	FALSE	-0.04	-0.049	FALSE	0	-0.308	FALSE
285315	C3orf33	-0.103	-0.039	FALSE	-0.082	0.031	FALSE	-0.043	0.042	FALSE	-0.022	0.067	FALSE	0.025	0.296	FALSE
285237	C3orf38	-0.515	-0.024	TRUE	-0.424	-0.002	TRUE	-0.369	0.029	TRUE	-0.285	0.033	TRUE	-0.193	0.024	TRUE
79669	C3orf52	-0.671	-0.038	TRUE	-0.59	0.038	TRUE	-0.445	0.035	TRUE	-0.308	0.019	TRUE	-0.201	0.347	TRUE
205428	DIPK2A	-0.311	0.119	FALSE	-0.262	0.16	FALSE	-0.164	0.071	FALSE	-0.098	-0.058	FALSE	-0.02	-0.392	FALSE
200844	C3orf67	-0.129	-0.034	FALSE	-0.082	-0.093	FALSE	-0.056	-0.079	FALSE	-0.021	-0.119	FALSE	0.008	-0.268	FALSE
401097	C3orf80	-0.195	-0.124	FALSE	-0.165	-0.162	FALSE	-0.114	-0.175	FALSE	-0.071	-0.255	FALSE	-0.018	-0.447	FALSE
722	C4BPA	-0.257	0.006	FALSE	-0.159	0.003	FALSE	-0.125	-0.009	FALSE	-0.072	0.001	FALSE	-0.006	0.103	FALSE
725	C4BPB	-0.236	-0.022	FALSE	-0.187	-0.063	FALSE	-0.134	-0.074	FALSE	-0.101	-0.053	FALSE	-0.056	0.085	FALSE
132321	C4orf33	-0.302	-0.049	FALSE	-0.19	-0.12	FALSE	-0.148	-0.169	FALSE	-0.1	-0.23	FALSE	-0.028	-0.508	FALSE
132989	C4orf36	-0.206	-0.011	FALSE	-0.153	-0.007	FALSE	-0.105	-0.087	FALSE	-0.071	-0.133	FALSE	-0.035	-0.386	FALSE
152940	C4orf45	-0.257	0.008	FALSE	-0.176	0.003	FALSE	-0.14	0.046	FALSE	-0.07	-0.045	FALSE	-0.02	-0.441	FALSE
401115	C4orf48	-0.416	0.019	FALSE	-0.306	-0.005	FALSE	-0.218	-0.061	FALSE	-0.167	-0.136	FALSE	-0.069	-0.401	FALSE
727	C5	-0.251	-0.077	FALSE	-0.228	-0.007	FALSE	-0.175	0.025	FALSE	-0.124	0.018	FALSE	-0.061	0.035	FALSE
728	C5AR1	-0.325	-0.129	FALSE	-0.242	-0.154	FALSE	-0.207	-0.136	FALSE	-0.171	-0.143	FALSE	-0.11	-0.11	FALSE
27202	C5AR2	-0.383	0.294	FALSE	-0.312	0.349	FALSE	-0.232	0.331	FALSE	-0.161	0.365	FALSE	-0.07	0.537	FALSE
56951	C5orf15	-0.213	-0.145	FALSE	-0.166	-0.132	FALSE	-0.134	-0.206	FALSE	-0.107	-0.254	FALSE	-0.074	-0.317	FALSE
55322	C5orf22	-0.375	-0.095	FALSE	-0.285	-0.128	FALSE	-0.258	-0.105	FALSE	-0.184	-0.177	FALSE	-0.081	-0.216	FALSE
134553	C5orf24	-0.225	-0.183	FALSE	-0.171	-0.194	FALSE	-0.147	-0.211	FALSE	-0.101	-0.33	FALSE	-0.046	-0.529	FALSE
375444	C5orf34	-0.272	-0.044	FALSE	-0.188	-0.057	FALSE	-0.155	-0.025	FALSE	-0.121	-0.07	FALSE	-0.073	-0.273	FALSE
389336	C5orf46	-0.125	0.128	FALSE	-0.072	0.169	FALSE	-0.017	0.084	FALSE	0.007	0.121	FALSE	0.033	-0.052	FALSE
133491	C5orf47	-0.43	-0.089	TRUE	-0.326	-0.142	TRUE	-0.26	-0.239	TRUE	-0.192	-0.251	TRUE	-0.092	-0.355	TRUE
285636	C5orf51	-0.188	-0.315	FALSE	-0.161	-0.261	FALSE	-0.118	-0.284	FALSE	-0.066	-0.354	FALSE	-0.009	-0.539	FALSE
100190949	C5orf52	-0.539	-0.156	TRUE	-0.43	-0.142	TRUE	-0.38	-0.075	TRUE	-0.3	-0.014	TRUE	-0.167	0.107	TRUE
729	C6	-0.398	0.288	FALSE	-0.343	0.344	FALSE	-0.273	0.34	FALSE	-0.209	0.364	FALSE	-0.118	0.403	FALSE
10665	TSBP1	-0.331	0.094	FALSE	-0.262	0.039	FALSE	-0.211	0.023	FALSE	-0.136	-0.115	FALSE	-0.05	-0.404	FALSE
64771	ILRUN	-0.357	-0.025	FALSE	-0.281	-0.054	FALSE	-0.234	-0.078	FALSE	-0.173	-0.171	FALSE	-0.098	-0.383	FALSE
168090	C6orf118	-0.223	0.001	FALSE	-0.161	0.009	FALSE	-0.116	0.007	FALSE	-0.08	0.029	FALSE	-0.044	0.032	FALSE
221545	C6orf136	-0.455	0.013	TRUE	-0.387	-0.059	TRUE	-0.321	-0.085	TRUE	-0.269	-0.116	TRUE	-0.157	-0.171	TRUE
29113	C6orf15	-0.497	-0.184	TRUE	-0.387	-0.255	TRUE	-0.351	-0.294	TRUE	-0.284	-0.355	TRUE	-0.205	-0.38	TRUE
206412	C6orf163	-0.091	0.065	FALSE	-0.069	0.186	FALSE	-0.057	0.254	FALSE	-0.045	0.396	FALSE	-0.025	0.712	FALSE
404220	C6orf201	-0.186	-0.19	FALSE	-0.14	-0.249	FALSE	-0.114	-0.281	FALSE	-0.054	-0.39	FALSE	-0.02	-0.579	FALSE
[truncated: 14,158 more rows]

## Sheet: S60_C40
EntrezID	GeneSymbol	q1.efficacy	q1.selectivity	q1.isEssential	q2.5.efficacy	q2.5.selectivity	q2.5.isEssential	q5.efficacy	q5.selectivity	q5.isEssential	q10.efficacy	q10.selectivity	q10.isEssential	q25.efficacy	q25.selectivity	q25.isEssential
[truncated: 15,847 more rows]

[truncated: 3 more sheets: S40_C60, S20_C80, CRISPR]
