# Supplementary material for: shinyDepMap, a tool to identify targetable cancer genes and their functional connections from Cancer Dependency Map data
Source: eLife. 2021 Feb 8;10:e57116. doi: 10.7554/eLife.57116 (PMC7924953; doi:10.7554/eLife.57116)
Supplement: Figure 3—source data 2. [file elife-57116-fig3-data2.xlsx]

## Sheet: shRNA
Gene set	Pathway	Signed logP (Efficacy)	Signed logP (Selectivity)
Essential	KEGG_OXIDATIVE_PHOSPHORYLATION	-6.99997	0.00560787
Essential	REACTOME_ANTIVIRAL_MECHANISM_BY_IFN_STIMULATED_GENES	-6.99966	-0.0692951
Essential	REACTOME_TRANSPORT_OF_MATURE_TRANSCRIPT_TO_CYTOPLASM	-6.99971	-0.235289
Essential	REACTOME_RECRUITMENT_OF_NUMA_TO_MITOTIC_CENTROSOMES	-6.99971	0.0287683
Essential	REACTOME_HIV_INFECTION	-7	0.121338
Essential	REACTOME_HIV_LIFE_CYCLE	-7	0.0922207
Essential	REACTOME_MITOTIC_PROMETAPHASE	-7	0.1551
Essential	REACTOME_SIGNALING_BY_FGFR	-6.99981	0.147166
Essential	REACTOME_REGULATION_OF_PLK1_ACTIVITY_AT_G2_M_TRANSITION	-6.99971	0.0888871
Essential	REACTOME_CENTROSOME_MATURATION	-6.99936	0.000664888
Essential	REACTOME_INTERLEUKIN_1_FAMILY_SIGNALING	-7	0.0895806
Essential	REACTOME_DISORDERS_OF_TRANSMEMBRANE_TRANSPORTERS	-7	0.164251
Essential	REACTOME_HDR_THROUGH_HOMOLOGOUS_RECOMBINATION_HRR	-6.99906	0.203702
Essential	REACTOME_GLOBAL_GENOME_NUCLEOTIDE_EXCISION_REPAIR_GG_NER	-6.99979	0.0129744
Essential	REACTOME_RNA_POLYMERASE_II_PRE_TRANSCRIPTION_EVENTS	-6.99969	-0.191496
Essential	REACTOME_DUAL_INCISION_IN_TC_NER	-6.99906	0.225001
Essential	REACTOME_PTEN_REGULATION	-6.99999	-0.0986232
Essential	REACTOME_RNA_POLYMERASE_II_TRANSCRIBES_SNRNA_GENES	-6.99919	0.10029
Essential	REACTOME_MITOTIC_SPINDLE_CHECKPOINT	-6.99994	0.171154
Essential	REACTOME_TRNA_PROCESSING	-6.99994	-0.0915787
Essential	REACTOME_THE_ROLE_OF_GTSE1_IN_G2_M_PROGRESSION_AFTER_G2_CHECKPOINT	-6.99961	0.241424
Essential	REACTOME_GOLGI_TO_ER_RETROGRADE_TRANSPORT	-6.99999	0.0404763
Essential	GO_HEMATOPOIETIC_PROGENITOR_CELL_DIFFERENTIATION	-7	0.0650845
Essential	GO_DNA_TEMPLATED_TRANSCRIPTION_ELONGATION	-6.99995	-0.102075
Essential	GO_REGULATION_OF_MRNA_CATABOLIC_PROCESS	-7	-0.12966
Essential	GO_TELOMERE_ORGANIZATION	-7	0.230334
Essential	GO_MICROTUBULE_CYTOSKELETON_ORGANIZATION	-7	0.182528
Essential	GO_NUCLEIC_ACID_PHOSPHODIESTER_BOND_HYDROLYSIS	-7	0.0538838
Essential	GO_INNATE_IMMUNE_RESPONSE_ACTIVATING_CELL_SURFACE_RECEPTOR_SIGNALING_PATHWAY	-6.99995	0.148889
Essential	GO_AMINE_METABOLIC_PROCESS	-6.99999	-0.120972
Essential	GO_NCRNA_TRANSCRIPTION	-6.99989	0.156121
Essential	GO_DNA_REPAIR	-7	0.190027
Essential	GO_FC_EPSILON_RECEPTOR_SIGNALING_PATHWAY	-6.99997	0.0576259
Essential	GO_CANONICAL_WNT_SIGNALING_PATHWAY	-7	0.243939
Essential	GO_TRANSCRIPTION_ELONGATION_FROM_RNA_POLYMERASE_II_PROMOTER	-6.99969	-0.244829
Essential	GO_PROTEIN_LOCALIZATION_TO_CHROMOSOME	-6.99969	-0.131577
Essential	GO_FC_RECEPTOR_SIGNALING_PATHWAY	-7	0.137739
Essential	GO_NUCLEOBASE_CONTAINING_COMPOUND_TRANSPORT	-7	0.242154
Essential	GO_NIK_NF_KAPPAB_SIGNALING	-7	0.105044
Essential	GO_NEGATIVE_REGULATION_OF_CHROMOSOME_ORGANIZATION	-6.99999	0.223225
Essential	GO_TUMOR_NECROSIS_FACTOR_MEDIATED_SIGNALING_PATHWAY	-7	0.0990234
Essential	GO_MULTI_ORGANISM_LOCALIZATION	-6.99926	0.129174
Essential	GO_INTERLEUKIN_1_MEDIATED_SIGNALING_PATHWAY	-6.99992	0.0892825
Essential	GO_NEGATIVE_REGULATION_OF_CELL_CYCLE_G2_M_PHASE_TRANSITION	-6.99991	0.122651
Essential	GO_REGULATION_OF_CELLULAR_AMIDE_METABOLIC_PROCESS	-7	0.106443
Essential	GO_REGULATION_OF_DNA_BIOSYNTHETIC_PROCESS	-6.99994	0.0998674
Essential	GO_POSITIVE_REGULATION_OF_CHROMOSOME_ORGANIZATION	-7	0.214349
Essential	GO_REGULATION_OF_POSTTRANSCRIPTIONAL_GENE_SILENCING	-6.99993	0.146014
Essential	GO_NEGATIVE_REGULATION_OF_WNT_SIGNALING_PATHWAY	-7	0.165795
Essential	GO_REGULATION_OF_CARBOHYDRATE_CATABOLIC_PROCESS	-6.99966	0.185821
Essential	GO_REGULATION_OF_RNA_SPLICING	-6.99998	0.164816
Essential	GO_NUCLEAR_CHROMOSOME_TELOMERIC_REGION	-6.99997	0.0665259
Essential	GO_CHROMOSOME_CENTROMERIC_REGION	-7	-0.0305718
Essential	GO_NUCLEAR_SPECK	-7	0.0606753
Essential	GO_CHROMOSOMAL_REGION	-7	0.0101123
Essential	GO_SPINDLE_POLE	-6.99999	-0.131427
Essential	GO_CENTROSOME	-7	0.0172579
Essential	GO_MITOCHONDRIAL_MATRIX	-7	0.0195241
Essential	GO_RIBONUCLEOPROTEIN_GRANULE	-7	0.0812196
Essential	GO_KINETOCHORE	-6.99999	-0.104985
Essential	GO_CONDENSED_CHROMOSOME_CENTROMERIC_REGION	-6.99995	-0.0454101
Essential	GO_NUCLEAR_PORE	-6.99971	0.058423
Essential	GO_ATPASE_ACTIVITY_COUPLED	-7	0.047218
Essential	GO_UNFOLDED_PROTEIN_BINDING	-6.99997	-0.149305
Essential	GO_SINGLE_STRANDED_DNA_BINDING	-6.99992	0.0177604
Essential	GO_TRANSLATION_REGULATOR_ACTIVITY_NUCLEIC_ACID_BINDING	-6.99988	0.0836348
Essential	GO_ATPASE_ACTIVITY	-7	0.000985181
Essential	GO_MRNA_EXPORT_FROM_NUCLEUS	-6.99994	-0.159026
Essential	GO_SNRNA_TRANSCRIPTION	-6.99906	-0.129724
Essential	GO_PROTEIN_CONTAINING_COMPLEX_DISASSEMBLY	-7	0.0695869
Essential	GO_NEGATIVE_REGULATION_OF_NUCLEOBASE_CONTAINING_COMPOUND_METABOLIC_PROCESS	-7	0.120187
Essential	GO_REGULATION_OF_MRNA_PROCESSING	-6.99999	0.105958
Essential	GO_MRNA_TRANSPORT	-7	0.0699263
Essential	GO_ESTABLISHMENT_OF_RNA_LOCALIZATION	-7	-0.0890279
Essential	GO_REGULATION_OF_RNA_METABOLIC_PROCESS	-7	0.157165
Essential	GO_OTHER_ORGANISM	-6.99936	-0.0267791
Essential	ONCOGENIC_SIGNATURE_GCNP_SHH_UP_LATE.V1_UP	-7	0.103169
Essential	HALLMARK_OXIDATIVE_PHOSPHORYLATION	-7	0.000545431

## Sheet: S80_C20
Gene set	Pathway	Signed logP (Efficacy)	Signed logP (Selectivity)
Essential	KEGG_OXIDATIVE_PHOSPHORYLATION	-6.99999	3.47065e-05
Essential	KEGG_PARKINSONS_DISEASE	-6.99999	-0.00623238
Essential	REACTOME_ANTIVIRAL_MECHANISM_BY_IFN_STIMULATED_GENES	-6.99982	0.00268878
Essential	REACTOME_DOWNSTREAM_SIGNALING_EVENTS_OF_B_CELL_RECEPTOR_BCR	-6.99985	0.239757
Essential	REACTOME_TRANSPORT_OF_MATURE_TRANSCRIPT_TO_CYTOPLASM	-6.99985	-0.155535
Essential	REACTOME_GLYCOLYSIS	-6.99971	0.000976182
Essential	REACTOME_RECRUITMENT_OF_NUMA_TO_MITOTIC_CENTROSOMES	-6.99985	0.00833433
Essential	REACTOME_CHROMOSOME_MAINTENANCE	-6.99996	0.174484
Essential	REACTOME_HOST_INTERACTIONS_OF_HIV_FACTORS	-7	0.247314
Essential	REACTOME_MITOTIC_PROMETAPHASE	-7	0.0433266
Essential	REACTOME_RESPIRATORY_ELECTRON_TRANSPORT_ATP_SYNTHESIS_BY_CHEMIOSMOTIC_COUPLING_AND_HEAT_PRODUCTION_BY_UNCOUPLING_PROTEINS	-6.99998	-0.120074
Essential	REACTOME_ORGANELLE_BIOGENESIS_AND_MAINTENANCE	-7	0.0176866
Essential	REACTOME_ER_TO_GOLGI_ANTEROGRADE_TRANSPORT	-7	0.112034
Essential	REACTOME_EPIGENETIC_REGULATION_OF_GENE_EXPRESSION	-7	0.0987723
Essential	REACTOME_RESOLUTION_OF_SISTER_CHROMATID_COHESION	-6.99999	0.213136
Essential	REACTOME_CENTROSOME_MATURATION	-6.99963	0.002022
Essential	REACTOME_NEGATIVE_EPIGENETIC_REGULATION_OF_RRNA_EXPRESSION	-6.99996	-0.150293
Essential	REACTOME_DISORDERS_OF_TRANSMEMBRANE_TRANSPORTERS	-7	0.0220553
Essential	REACTOME_COPI_MEDIATED_ANTEROGRADE_TRANSPORT	-6.99995	0.0422697
Essential	REACTOME_INTRA_GOLGI_AND_RETROGRADE_GOLGI_TO_ER_TRAFFIC	-7	0.126198
Essential	REACTOME_MITOTIC_SPINDLE_CHECKPOINT	-6.99997	0.125574
Essential	REACTOME_AURKA_ACTIVATION_BY_TPX2	-6.99948	4.16099e-05
Essential	REACTOME_GOLGI_TO_ER_RETROGRADE_TRANSPORT	-7	0.155462
Essential	REACTOME_NEDDYLATION	-7	0.102714
Essential	REACTOME_INTERLEUKIN_1_SIGNALING	-6.99997	0.175406
Essential	GO_DNA_DEPENDENT_DNA_REPLICATION	-7	0.169718
Essential	GO_CHROMOSOME_SEPARATION	-6.99989	0.147393
Essential	GO_CELLULAR_AMINO_ACID_METABOLIC_PROCESS	-7	0.0726798
Essential	GO_DNA_CONFORMATION_CHANGE	-7	0.22457
Essential	GO_OXIDATIVE_PHOSPHORYLATION	-6.99999	0.0311446
Essential	GO_NUCLEOBASE_CONTAINING_COMPOUND_TRANSPORT	-7	0.0828241
Essential	GO_TUMOR_NECROSIS_FACTOR_MEDIATED_SIGNALING_PATHWAY	-7	0.0657868
Essential	GO_MULTI_ORGANISM_LOCALIZATION	-6.99957	0.028119
Essential	GO_MEIOTIC_CELL_CYCLE	-7	0.0730139
Essential	GO_NUCLEUS_ORGANIZATION	-6.99999	-0.247937
Essential	GO_GOLGI_VESICLE_TRANSPORT	-7	0.134298
Essential	GO_RECOMBINATIONAL_REPAIR	-6.99999	0.179465
Essential	GO_REGULATION_OF_POSTTRANSCRIPTIONAL_GENE_SILENCING	-6.99997	0.208652
Essential	GO_METHYLATION	-7	0.0970029
Essential	GO_MACROMOLECULE_METHYLATION	-7	0.0419621
Essential	GO_DNA_PACKAGING	-7	0.248822
Essential	GO_GENE_SILENCING_BY_RNA	-7	0.173156
Essential	GO_REGULATION_OF_GENE_SILENCING	-7	0.0969863
Essential	GO_CHROMOSOME_CENTROMERIC_REGION	-7	-0.0410718
Essential	GO_RNA_POLYMERASE_COMPLEX	-6.99997	0.163795
Essential	GO_NUCLEAR_SPECK	-7	0.236385
Essential	GO_CHROMOSOMAL_REGION	-7	-0.0360896
Essential	GO_SPINDLE_POLE	-7	0.00587466
Essential	GO_CENTROSOME	-7	0.0298047
Essential	GO_RIBONUCLEOPROTEIN_GRANULE	-7	0.209143
Essential	GO_INNER_MITOCHONDRIAL_MEMBRANE_PROTEIN_COMPLEX	-6.99999	-0.0660641
Essential	GO_KINETOCHORE	-6.99999	-0.197346
Essential	GO_CONDENSED_CHROMOSOME_CENTROMERIC_REGION	-6.99998	-0.0865405
Essential	GO_CHROMOSOME_TELOMERIC_REGION	-7	0.102501
Essential	GO_NUCLEAR_PORE	-6.99985	0.041577
Essential	GO_SPINDLE	-7	-0.0191054
Essential	GO_ATPASE_ACTIVITY_COUPLED	-7	0.052096
Essential	GO_UNFOLDED_PROTEIN_BINDING	-6.99999	-0.203288
Essential	GO_MRNA_BINDING	-7	0.0637659
Essential	GO_RNA_POLYMERASE_BINDING	-6.99916	-0.0305101
Essential	GO_SINGLE_STRANDED_DNA_BINDING	-6.99997	-0.0444377
Essential	GO_ATPASE_ACTIVITY	-7	-0.0580029
Essential	GO_RNA_EXPORT_FROM_NUCLEUS	-7	-0.127224
Essential	GO_MRNA_EXPORT_FROM_NUCLEUS	-6.99997	-0.182776
Essential	GO_ENDOPLASMIC_RETICULUM_TO_GOLGI_VESICLE_MEDIATED_TRANSPORT	-7	0.0926859
Essential	GO_PROTEIN_CONTAINING_COMPLEX_LOCALIZATION	-7	-0.055783
Essential	GO_PROTEIN_CONTAINING_COMPLEX_DISASSEMBLY	-7	0.150018
Essential	GO_ATP_SYNTHESIS_COUPLED_ELECTRON_TRANSPORT	-6.99983	-0.0170439
Essential	GO_MRNA_TRANSPORT	-7	-0.123535
Essential	GO_ESTABLISHMENT_OF_RNA_LOCALIZATION	-7	-0.0216257
Essential	GO_MICROTUBULE_CYTOSKELETON_ORGANIZATION_INVOLVED_IN_MITOSIS	-6.99999	0.0675727
Essential	GO_FIBRILLAR_CENTER	-6.99999	-0.106325
Essential	GO_OTHER_ORGANISM	-6.99963	0.00118074
Essential	ONCOGENIC_SIGNATURE_CAMP_UP.V1_UP	-7	-0.190697
Essential	HALLMARK_OXIDATIVE_PHOSPHORYLATION	-7	0.00025696

## Sheet: S60_C40
Gene set	Pathway	Signed logP (Efficacy)	Signed logP (Selectivity)
Essential	KEGG_PURINE_METABOLISM	-7	0.0411379
Essential	KEGG_PARKINSONS_DISEASE	-7	0.210936
Essential	REACTOME_BASE_EXCISION_REPAIR	-6.99996	0.183142
Essential	REACTOME_MITOCHONDRIAL_PROTEIN_IMPORT	-6.99946	0.0862381
Essential	REACTOME_TRANSPORT_OF_MATURE_TRANSCRIPT_TO_CYTOPLASM	-6.99995	0.00117182
Essential	REACTOME_RECRUITMENT_OF_NUMA_TO_MITOTIC_CENTROSOMES	-6.99995	0.194206
Essential	REACTOME_DEADENYLATION_DEPENDENT_MRNA_DECAY	-6.99951	0.0735137
Essential	REACTOME_CHROMOSOME_MAINTENANCE	-6.99999	0.121003
Essential	REACTOME_RESPIRATORY_ELECTRON_TRANSPORT	-6.99997	0.0416726
Essential	REACTOME_HIV_INFECTION	-7	0.154385
Essential	REACTOME_GLUCOSE_METABOLISM	-6.99998	0.106616
Essential	REACTOME_TELOMERE_MAINTENANCE	-6.9999	0.130513
Essential	REACTOME_RESPIRATORY_ELECTRON_TRANSPORT_ATP_SYNTHESIS_BY_CHEMIOSMOTIC_COUPLING_AND_HEAT_PRODUCTION_BY_UNCOUPLING_PROTEINS	-7	0.156653
Essential	REACTOME_ORGANELLE_BIOGENESIS_AND_MAINTENANCE	-7	0.179372
Essential	REACTOME_GENE_SILENCING_BY_RNA	-7	-0.193332
Essential	REACTOME_NUCLEAR_ENVELOPE_BREAKDOWN	-6.99928	0.0375775
Essential	REACTOME_CENTROSOME_MATURATION	-6.99986	0.14862
Essential	REACTOME_SIGNALING_BY_HEDGEHOG	-7	0.236451
Essential	REACTOME_TRANSCRIPTIONAL_REGULATION_BY_SMALL_RNAS	-6.99999	-0.167316
Essential	REACTOME_DECTIN_1_MEDIATED_NONCANONICAL_NF_KB_SIGNALING	-6.99969	0.156131
Essential	REACTOME_DISORDERS_OF_TRANSMEMBRANE_TRANSPORTERS	-7	0.0200432
Essential	REACTOME_TNFR2_NON_CANONICAL_NF_KB_PATHWAY	-6.99999	0.0764686
Essential	REACTOME_HDR_THROUGH_HOMOLOGOUS_RECOMBINATION_HRR	-6.99977	0.211295
Essential	REACTOME_MAPK6_MAPK4_SIGNALING	-6.99998	0.229185
Essential	REACTOME_AURKA_ACTIVATION_BY_TPX2	-6.99979	0.148458
Essential	GO_CELLULAR_PROTEIN_COMPLEX_DISASSEMBLY	-7	0.193618
Essential	GO_MITOCHONDRIAL_RESPIRATORY_CHAIN_COMPLEX_ASSEMBLY	-6.99995	0.119196
Essential	GO_POSTREPLICATION_REPAIR	-6.99903	0.0642014
Essential	GO_CELLULAR_AMINO_ACID_METABOLIC_PROCESS	-7	0.212849
Essential	GO_NUCLEIC_ACID_PHOSPHODIESTER_BOND_HYDROLYSIS	-7	0.0538968
Essential	GO_TRANSCRIPTION_ELONGATION_FROM_RNA_POLYMERASE_II_PROMOTER	-6.99994	0.232001
Essential	GO_REGULATION_OF_CELLULAR_KETONE_METABOLIC_PROCESS	-7	0.127771
Essential	GO_MRNA_3_END_PROCESSING	-6.99999	0.0370116
Essential	GO_RNA_SPLICING_VIA_TRANSESTERIFICATION_REACTIONS	-7	0.118763
Essential	GO_NUCLEOBASE_CONTAINING_COMPOUND_TRANSPORT	-7	0.222949
Essential	GO_TUMOR_NECROSIS_FACTOR_MEDIATED_SIGNALING_PATHWAY	-7	0.12968
Essential	GO_MULTI_ORGANISM_LOCALIZATION	-6.99982	0.0604597
Essential	GO_DNA_SYNTHESIS_INVOLVED_IN_DNA_REPAIR	-6.99913	0.158908
Essential	GO_RNA_3_END_PROCESSING	-7	0.0501883
Essential	GO_RNA_CATABOLIC_PROCESS	-7	0.128549
Essential	GO_RNA_LOCALIZATION	-7	0.137073
Essential	GO_RNA_SPLICING	-7	0.114828
Essential	GO_PROTEIN_TARGETING_TO_MITOCHONDRION	-6.99998	0.146635
Essential	GO_NUCLEAR_CHROMOSOME_TELOMERIC_REGION	-7	0.0656787
Essential	GO_ORGANELLE_INNER_MEMBRANE	-7	0.0119514
Essential	GO_MITOCHONDRIAL_MATRIX	-7	0.0737172
Essential	GO_MITOCHONDRIAL_MEMBRANE_PART	-7	0.00457618
Essential	GO_INNER_MITOCHONDRIAL_MEMBRANE_PROTEIN_COMPLEX	-7	0.113004
Essential	GO_CONDENSED_CHROMOSOME	-7	0.0492489
Essential	GO_NUCLEAR_PORE	-6.99995	0.0826326
Essential	GO_MITOCHONDRIAL_PROTEIN_COMPLEX	-7	-0.0190718
Essential	GO_UNFOLDED_PROTEIN_BINDING	-7	0.0528622
Essential	GO_TRNA_BINDING	-6.9994	-0.145546
Essential	GO_RIBONUCLEOPROTEIN_COMPLEX_BINDING	-7	0.147933
Essential	GO_TRANSLATION_FACTOR_ACTIVITY_RNA_BINDING	-6.99993	0.0457159
Essential	GO_METAL_CLUSTER_BINDING	-6.99934	0.0678446
Essential	GO_SINGLE_STRANDED_DNA_BINDING	-6.99999	0.0306865
Essential	GO_TRANSLATION_REGULATOR_ACTIVITY_NUCLEIC_ACID_BINDING	-6.99998	0.246982
Essential	GO_RIBONUCLEASE_ACTIVITY	-6.99999	0.19816
Essential	GO_RNA_EXPORT_FROM_NUCLEUS	-7	0.0961811
Essential	GO_MRNA_EXPORT_FROM_NUCLEUS	-6.99999	0.0130952
Essential	GO_RESPIRATORY_ELECTRON_TRANSPORT_CHAIN	-6.99999	0.226161
Essential	GO_PROTEIN_CONTAINING_COMPLEX_LOCALIZATION	-7	0.143856
Essential	GO_NUCLEAR_DNA_REPLICATION	-6.99921	0.204399
Essential	GO_TRANSPORT_OF_VIRUS	-6.99946	0.0884381
Essential	GO_MRNA_TRANSPORT	-7	0.23754
Essential	GO_OTHER_ORGANISM	-6.99986	0.00045849
Essential	GO_RESPIRASOME	-6.99996	0.110358
Essential	GO_RESPIRATORY_CHAIN_COMPLEX	-6.99988	0.194932
Essential	GO_TETHERING_COMPLEX	-6.9994	0.0761066
Essential	GO_PEPTIDASE_COMPLEX	-6.99995	0.167751
Essential	ONCOGENIC_SIGNATURE_CAMP_UP.V1_UP	-7	0.0246199
Essential	HALLMARK_UNFOLDED_PROTEIN_RESPONSE	-7	-0.235346

## Sheet: S40_C60
Gene set	Pathway	Signed logP (Efficacy)	Signed logP (Selectivity)
Selective & Essential	REACTOME_SIGNALING_BY_RHO_GTPASES	-7	6.99991
Selective & Essential	REACTOME_CELL_CYCLE_MITOTIC	-7	6.99997
Selective & Essential	REACTOME_RHO_GTPASE_EFFECTORS	-7	6.99935
Selective & Essential	REACTOME_CELLULAR_RESPONSES_TO_STRESS	-7	6.99991
Selective & Essential	REACTOME_TRANSCRIPTIONAL_REGULATION_BY_TP53	-7	6.99971
Selective & Essential	REACTOME_OTHER_INTERLEUKIN_SIGNALING	-7	6.99911
Selective & Essential	REACTOME_DISEASES_OF_SIGNAL_TRANSDUCTION	-7	6.99981
Selective & Essential	REACTOME_MAPK_FAMILY_SIGNALING_CASCADES	-7	6.99919
Selective & Essential	REACTOME_INTRACELLULAR_SIGNALING_BY_SECOND_MESSENGERS	-7	6.99932
Selective & Essential	GO_REGULATION_OF_WNT_SIGNALING_PATHWAY	-7	6.99959
Selective & Essential	GO_PEPTIDYL_LYSINE_MODIFICATION	-7	6.99975
Selective & Essential	GO_IN_UTERO_EMBRYONIC_DEVELOPMENT	-7	6.99958
Selective & Essential	GO_NEGATIVE_REGULATION_OF_CELL_CYCLE_PROCESS	-7	6.99951
Selective & Essential	GO_RESPONSE_TO_OXYGEN_LEVELS	-7	6.99976
Selective & Essential	GO_COVALENT_CHROMATIN_MODIFICATION	-7	6.99993
Selective & Essential	GO_NEGATIVE_REGULATION_OF_MITOTIC_CELL_CYCLE	-7	6.99934
Selective & Essential	GO_MITOCHONDRION_ORGANIZATION	-7	6.99996
Selective & Essential	GO_REGULATION_OF_CHROMOSOME_ORGANIZATION	-7	6.99954
Selective & Essential	GO_REGULATION_OF_CELL_CYCLE_PHASE_TRANSITION	-7	6.9999
Selective & Essential	GO_METHYLATION	-7	6.9995
Selective & Essential	GO_POSITIVE_REGULATION_OF_CELL_CYCLE	-7	6.99979
Selective & Essential	GO_REGULATION_OF_GENE_EXPRESSION_EPIGENETIC	-7	6.99942
Selective & Essential	GO_NUCLEAR_CHROMATIN	-7	6.9997
Selective & Essential	GO_TRANSCRIPTION_FACTOR_COMPLEX	-7	6.99968
Selective & Essential	GO_UBIQUITIN_LIKE_PROTEIN_LIGASE_BINDING	-7	6.99927
Selective & Essential	GO_CHROMATIN_BINDING	-7	6.99997
Selective & Essential	GO_TRANSCRIPTION_COACTIVATOR_ACTIVITY	-7	6.99942
Selective & Essential	GO_REGULATION_OF_NUCLEOBASE_CONTAINING_COMPOUND_METABOLIC_PROCESS	-7	6.99996
Selective & Essential	GO_CELL_CELL_SIGNALING_BY_WNT	-7	6.99996
Selective & Essential	GO_DNA_BINDING_TRANSCRIPTION_FACTOR_BINDING	-7	6.99956
Essential	KEGG_RNA_DEGRADATION	-6.99979	0.108268
Essential	REACTOME_BASE_EXCISION_REPAIR	-6.99999	0.108788
Essential	REACTOME_TRANSPORT_OF_MATURE_TRANSCRIPT_TO_CYTOPLASM	-6.99999	0.101648
Essential	REACTOME_NUCLEOTIDE_EXCISION_REPAIR	-7	0.200995
Essential	REACTOME_TELOMERE_MAINTENANCE	-6.99997	0.199257
Essential	REACTOME_HOST_INTERACTIONS_WITH_INFLUENZA_FACTORS	-6.99906	0.0812678
Essential	REACTOME_GENE_SILENCING_BY_RNA	-7	0.0642796
Essential	REACTOME_NUCLEAR_ENVELOPE_BREAKDOWN	-6.9997	0.243376
Essential	REACTOME_AUF1_HNRNP_D0_BINDS_AND_DESTABILIZES_MRNA	-6.99979	0.157979
Essential	REACTOME_SUMOYLATION_OF_RNA_BINDING_PROTEINS	-6.99947	0.0760871
Essential	REACTOME_SUMOYLATION_OF_DNA_REPLICATION_PROTEINS	-6.9994	-0.0362939
Essential	REACTOME_MITOCHONDRIAL_TRANSLATION	-6.99999	0.073986
Essential	REACTOME_TRANSCRIPTIONAL_REGULATION_BY_SMALL_RNAS	-7	0.0305583
Essential	REACTOME_DISORDERS_OF_TRANSMEMBRANE_TRANSPORTERS	-7	0.0865786
Essential	REACTOME_HEDGEHOG_ON_STATE	-6.99999	0.13807
Essential	REACTOME_INFECTIOUS_DISEASE	-7	0.228155
Essential	REACTOME_MAPK6_MAPK4_SIGNALING	-7	0.249082
Essential	REACTOME_GLOBAL_GENOME_NUCLEOTIDE_EXCISION_REPAIR_GG_NER	-6.99999	0.15829
Essential	REACTOME_TRNA_PROCESSING	-7	0.0029324
Essential	REACTOME_RNA_POLYMERASE_I_TRANSCRIPTION	-7	0.226782
Essential	GO_TRNA_METABOLIC_PROCESS	-7	0.0182316
Essential	GO_MITOCHONDRIAL_TRANSLATION	-7	0.126093
Essential	GO_POSTREPLICATION_REPAIR	-6.99958	0.081808
Essential	GO_TRANSLATIONAL_TERMINATION	-7	0.0517371
Essential	GO_NUCLEIC_ACID_PHOSPHODIESTER_BOND_HYDROLYSIS	-7	0.0565377
Essential	GO_PROTEIN_TARGETING_TO_MEMBRANE	-7	0.0886196
Essential	GO_RNA_MODIFICATION	-7	0.0389399
Essential	GO_PROTEIN_FOLDING	-7	0.154877
Essential	GO_MULTI_ORGANISM_LOCALIZATION	-6.99994	0.166808
Essential	GO_ANTIGEN_PROCESSING_AND_PRESENTATION_OF_EXOGENOUS_PEPTIDE_ANTIGEN_VIA_MHC_CLASS_I	-6.99998	0.171363
Essential	GO_DNA_SYNTHESIS_INVOLVED_IN_DNA_REPAIR	-6.99962	0.0698142
Essential	GO_TRANSLATIONAL_ELONGATION	-7	0.0560146
Essential	GO_RNA_POLYADENYLATION	-6.99934	0.171654
Essential	GO_TRNA_PROCESSING	-7	0.059205
Essential	GO_CONDENSED_NUCLEAR_CHROMOSOME	-6.99999	0.0321236
Essential	GO_ORGANELLAR_RIBOSOME	-6.99998	0.147148
Essential	GO_SPLICEOSOMAL_COMPLEX	-7	0.182518
Essential	GO_POLYSOME	-6.99995	0.169267
Essential	GO_NUCLEAR_PORE	-6.99999	0.158215
Essential	GO_UNFOLDED_PROTEIN_BINDING	-7	0.138869
Essential	GO_TRANSLATION_INITIATION_FACTOR_ACTIVITY	-6.9994	0.117042
Essential	GO_TRNA_BINDING	-6.99976	0.193482
Essential	GO_SINGLE_STRANDED_DNA_BINDING	-7	0.157194
Essential	GO_RIBONUCLEASE_ACTIVITY	-7	0.172366
Essential	GO_NUCLEOTIDYLTRANSFERASE_ACTIVITY	-7	0.0500851
Essential	GO_MRNA_EXPORT_FROM_NUCLEUS	-7	0.199103
Essential	GO_VIRAL_GENE_EXPRESSION	-7	0.164842
Essential	GO_TRANSPORT_OF_VIRUS	-6.99979	0.0563742
Essential	GO_MITOCHONDRIAL_TRANSLATIONAL_TERMINATION	-6.99998	0.120586
Essential	GO_MITOCHONDRIAL_GENE_EXPRESSION	-7	0.0862264
Essential	GO_OTHER_ORGANISM	-6.99996	-0.0695109
Selective	GO_MUSCLE_TISSUE_DEVELOPMENT	-0.0762513	6.99976
Selective	GO_REGULATION_OF_DEVELOPMENTAL_GROWTH	-0.0193963	6.99942
Selective	GO_POSITIVE_REGULATION_OF_MAPK_CASCADE	-0.000431643	6.99997
Selective	GO_LEUKOCYTE_DIFFERENTIATION	-0.121065	6.99997
Selective	GO_FOREBRAIN_DEVELOPMENT	-0.124021	6.99974
Selective	GO_AMEBOIDAL_TYPE_CELL_MIGRATION	-0.0622898	6.99976
Selective	GO_CELL_SUBSTRATE_ADHESION	-0.00167025	6.99941
Selective	GO_REGULATION_OF_LIPID_METABOLIC_PROCESS	-0.165651	6.99972
Selective	GO_REGULATION_OF_SMALL_GTPASE_MEDIATED_SIGNAL_TRANSDUCTION	-0.000336709	6.99949
Selective	GO_POSITIVE_REGULATION_OF_CELL_ADHESION	-0.0309609	6.9998
Selective	GO_RAS_PROTEIN_SIGNAL_TRANSDUCTION	-0.0150255	6.9999
Selective	GO_UROGENITAL_SYSTEM_DEVELOPMENT	-0.0157707	6.99944
Selective	GO_REGULATION_OF_MAP_KINASE_ACTIVITY	-0.086791	6.99956
Selective	GO_SENSORY_ORGAN_DEVELOPMENT	-0.000184745	6.99997
Selective	GO_RESPONSE_TO_TOXIC_SUBSTANCE	-0.0306877	6.99996
Selective	GO_EPITHELIAL_CELL_PROLIFERATION	-0.0823043	6.99973
Selective	GO_EMBRYONIC_ORGAN_DEVELOPMENT	-0.188751	6.99988
Selective	GO_REGULATION_OF_GTPASE_ACTIVITY	-0.000519423	6.99993
Selective	GO_CELL_GROWTH	-0.123012	6.99993
Selective	GO_TRANSMEMBRANE_RECEPTOR_PROTEIN_SERINE_THREONINE_KINASE_SIGNALING_PATHWAY	-0.107765	6.99944
Selective	GO_LYMPHOCYTE_DIFFERENTIATION	-0.146257	6.99961
Selective	GO_ENZYME_ACTIVATOR_ACTIVITY	-0.0356457	6.99996
Selective	GO_CAMERA_TYPE_EYE_DEVELOPMENT	-0.006184	6.9992
Selective	GO_SENSORY_SYSTEM_DEVELOPMENT	-0.00398604	6.99966
Selective	GO_EPITHELIAL_TUBE_MORPHOGENESIS	-0.0686995	6.99937
Selective	GO_REGULATION_OF_SUPRAMOLECULAR_FIBER_ORGANIZATION	-0.00528433	6.99947

## Sheet: S20_C80
Gene set	Pathway	Signed logP (Efficacy)	Signed logP (Selectivity)
Selective & Essential	REACTOME_CELLULAR_RESPONSES_TO_STRESS	-7	6.99995
Selective & Essential	REACTOME_TRANSCRIPTIONAL_REGULATION_BY_TP53	-7	6.99982
Selective & Essential	REACTOME_CHROMATIN_ORGANIZATION	-7	6.99907
Selective & Essential	REACTOME_DISEASES_OF_SIGNAL_TRANSDUCTION	-7	6.99988
Selective & Essential	REACTOME_DEUBIQUITINATION	-7	6.99922
Selective & Essential	REACTOME_INTRACELLULAR_SIGNALING_BY_SECOND_MESSENGERS	-7	6.99955
Selective & Essential	GO_REGULATION_OF_WNT_SIGNALING_PATHWAY	-7	6.99974
Selective & Essential	GO_PROTEIN_MODIFICATION_BY_SMALL_PROTEIN_REMOVAL	-7	6.99914
Selective & Essential	GO_PEPTIDYL_LYSINE_MODIFICATION	-7	6.99984
Selective & Essential	GO_IN_UTERO_EMBRYONIC_DEVELOPMENT	-7	6.99973
Selective & Essential	GO_NEGATIVE_REGULATION_OF_CELL_CYCLE_PROCESS	-7	6.99968
Selective & Essential	GO_RESPONSE_TO_OXYGEN_LEVELS	-7	6.99986
Selective & Essential	GO_COVALENT_CHROMATIN_MODIFICATION	-7	6.99996
Selective & Essential	GO_POSITIVE_REGULATION_OF_CELL_CYCLE_PROCESS	-7	6.99927
Selective & Essential	GO_NEGATIVE_REGULATION_OF_MITOTIC_CELL_CYCLE	-7	6.99956
Selective & Essential	GO_RESPONSE_TO_RADIATION	-7	6.99995
Selective & Essential	GO_SIGNAL_TRANSDUCTION_BY_P53_CLASS_MEDIATOR	-7	6.99915
Selective & Essential	GO_MITOCHONDRION_ORGANIZATION	-7	6.99998
Selective & Essential	GO_REGULATION_OF_CHROMOSOME_ORGANIZATION	-7	6.9997
Selective & Essential	GO_REGULATION_OF_CELL_CYCLE_PHASE_TRANSITION	-7	6.99994
Selective & Essential	GO_METHYLATION	-7	6.99968
Selective & Essential	GO_MACROMOLECULE_METHYLATION	-7	6.99929
Selective & Essential	GO_POSITIVE_REGULATION_OF_CELL_CYCLE	-7	6.99987
Selective & Essential	GO_REGULATION_OF_GENE_EXPRESSION_EPIGENETIC	-7	6.99962
Selective & Essential	GO_NUCLEAR_CHROMATIN	-7	6.99981
Selective & Essential	GO_TRANSCRIPTION_FACTOR_COMPLEX	-7	6.9998
Selective & Essential	GO_UBIQUITIN_LIKE_PROTEIN_LIGASE_BINDING	-7	6.99951
Selective & Essential	GO_CHROMATIN_BINDING	-7	6.99999
Selective & Essential	GO_TRANSCRIPTION_COACTIVATOR_ACTIVITY	-7	6.99962
Selective & Essential	GO_REGULATION_OF_NUCLEOBASE_CONTAINING_COMPOUND_METABOLIC_PROCESS	-7	6.99998
Selective & Essential	GO_RNA_POLYMERASE_II_SPECIFIC_DNA_BINDING_TRANSCRIPTION_FACTOR_BINDING	-7	6.9991
Selective & Essential	GO_DNA_BINDING_TRANSCRIPTION_FACTOR_BINDING	-7	6.99972
Essential	REACTOME_BASE_EXCISION_REPAIR	-7	0.0220781
Essential	REACTOME_NUCLEOTIDE_EXCISION_REPAIR	-7	0.24874
Essential	REACTOME_CHROMOSOME_MAINTENANCE	-7	0.171166
Essential	REACTOME_HIV_INFECTION	-7	0.170296
Essential	REACTOME_GENE_SILENCING_BY_RNA	-7	0.0243843
Essential	REACTOME_SUMOYLATION_OF_UBIQUITINYLATION_PROTEINS	-6.99913	0.191619
Essential	REACTOME_PCP_CE_PATHWAY	-7	0.233614
Essential	REACTOME_SUMOYLATION_OF_RNA_BINDING_PROTEINS	-6.99968	0.118698
Essential	REACTOME_NEGATIVE_EPIGENETIC_REGULATION_OF_RRNA_EXPRESSION	-7	0.20335
Essential	REACTOME_MITOCHONDRIAL_TRANSLATION	-7	0.239996
Essential	REACTOME_HEDGEHOG_OFF_STATE	-7	0.194275
Essential	REACTOME_DISORDERS_OF_TRANSMEMBRANE_TRANSPORTERS	-7	0.044438
Essential	REACTOME_HEDGEHOG_ON_STATE	-7	0.168492
Essential	REACTOME_INFECTIOUS_DISEASE	-7	0.124588
Essential	REACTOME_MAPK6_MAPK4_SIGNALING	-7	0.149888
Essential	REACTOME_GLOBAL_GENOME_NUCLEOTIDE_EXCISION_REPAIR_GG_NER	-7	0.236141
Essential	REACTOME_TRNA_PROCESSING	-7	-0.0934661
Essential	REACTOME_RNA_POLYMERASE_I_TRANSCRIPTION	-7	0.14702
Essential	REACTOME_DNA_DAMAGE_BYPASS	-6.99968	0.200322
Essential	GO_TRNA_METABOLIC_PROCESS	-7	0.0470102
Essential	GO_TRANSLATIONAL_TERMINATION	-7	0.102821
Essential	GO_NUCLEIC_ACID_PHOSPHODIESTER_BOND_HYDROLYSIS	-7	0.0735749
Essential	GO_RNA_MODIFICATION	-7	0.207638
Essential	GO_RNA_SPLICING_VIA_TRANSESTERIFICATION_REACTIONS	-7	0.150012
Essential	GO_NUCLEOBASE_CONTAINING_COMPOUND_TRANSPORT	-7	0.151114
Essential	GO_PROTEIN_FOLDING	-7	0.187956
Essential	GO_MULTI_ORGANISM_LOCALIZATION	-6.99997	0.0587352
Essential	GO_ANTIGEN_PROCESSING_AND_PRESENTATION_OF_EXOGENOUS_PEPTIDE_ANTIGEN_VIA_MHC_CLASS_I	-6.99999	0.215763
Essential	GO_TRANSLATIONAL_ELONGATION	-7	0.148196
Essential	GO_NEGATIVE_REGULATION_OF_CELL_CYCLE_G2_M_PHASE_TRANSITION	-7	0.219878
Essential	GO_RNA_LOCALIZATION	-7	0.0824564
Essential	GO_TRNA_PROCESSING	-7	0.112258
Essential	GO_CONDENSED_NUCLEAR_CHROMOSOME	-7	0.114727
Essential	GO_RNA_POLYMERASE_COMPLEX	-7	0.236008
Essential	GO_CAJAL_BODY	-6.99964	0.222095
Essential	GO_POLYSOME	-6.99998	0.243965
Essential	GO_PURINE_NTP_DEPENDENT_HELICASE_ACTIVITY	-6.99998	0.230834
Essential	GO_UNFOLDED_PROTEIN_BINDING	-7	0.144138
Essential	GO_TRANSLATION_INITIATION_FACTOR_ACTIVITY	-6.99964	-0.226762
Essential	GO_HELICASE_ACTIVITY	-7	0.183216
Essential	GO_TRANSLATION_FACTOR_ACTIVITY_RNA_BINDING	-6.99999	0.101917
Essential	GO_RNA_HELICASE_ACTIVITY	-6.99968	0.180068
Essential	GO_SINGLE_STRANDED_DNA_BINDING	-7	0.133581
Essential	GO_RIBONUCLEASE_ACTIVITY	-7	0.220116
Essential	GO_NUCLEOTIDYLTRANSFERASE_ACTIVITY	-7	0.173264
Essential	GO_RNA_EXPORT_FROM_NUCLEUS	-7	0.141125
Essential	GO_PROTEIN_CONTAINING_COMPLEX_LOCALIZATION	-7	0.104397
Essential	GO_MRNA_TRANSPORT	-7	0.108302
Essential	GO_ESTABLISHMENT_OF_RNA_LOCALIZATION	-7	0.240055
Essential	HALLMARK_DNA_REPAIR	-7	0.178171
Essential	HALLMARK_MYC_TARGETS_V1	-7	0.245837
Selective	KEGG_MAPK_SIGNALING_PATHWAY	-0.123657	6.99915
Selective	GO_MUSCLE_TISSUE_DEVELOPMENT	-0.0304951	6.99986
Selective	GO_POSITIVE_REGULATION_OF_MAPK_CASCADE	-7.11433e-05	6.99999
Selective	GO_LEUKOCYTE_DIFFERENTIATION	-0.0375059	6.99998
Selective	GO_FOREBRAIN_DEVELOPMENT	-0.0528538	6.99984
Selective	GO_AMEBOIDAL_TYPE_CELL_MIGRATION	-0.0133483	6.99986
Selective	GO_CELL_SUBSTRATE_ADHESION	-0.00482913	6.99961
Selective	GO_REGULATION_OF_LIPID_METABOLIC_PROCESS	-0.212494	6.99982
Selective	GO_CELL_JUNCTION_ORGANIZATION	-0.192328	6.99921
Selective	GO_REGULATION_OF_SMALL_GTPASE_MEDIATED_SIGNAL_TRANSDUCTION	-0.00147755	6.99967
Selective	GO_POSITIVE_REGULATION_OF_CELL_ADHESION	-0.036572	6.99988
Selective	GO_TISSUE_MIGRATION	-0.0382524	6.99927
Selective	GO_RAS_PROTEIN_SIGNAL_TRANSDUCTION	-0.0376096	6.99995
Selective	GO_UROGENITAL_SYSTEM_DEVELOPMENT	-0.0216106	6.99963
Selective	GO_REGULATION_OF_MAP_KINASE_ACTIVITY	-0.107889	6.99972
Selective	GO_SENSORY_ORGAN_DEVELOPMENT	-4.40397e-05	6.99999
Selective	GO_RESPONSE_TO_TOXIC_SUBSTANCE	-0.0156917	6.99998
Selective	GO_EPITHELIAL_CELL_PROLIFERATION	-0.0662537	6.99983
Selective	GO_STRESS_ACTIVATED_PROTEIN_KINASE_SIGNALING_CASCADE	-0.165506	6.99947
Selective	GO_EMBRYONIC_ORGAN_DEVELOPMENT	-0.146123	6.99993
Selective	GO_DEVELOPMENTAL_MATURATION	-0.0780481	6.99905
Selective	GO_CELL_GROWTH	-0.0484013	6.99996
Selective	GO_TRANSMEMBRANE_RECEPTOR_PROTEIN_SERINE_THREONINE_KINASE_SIGNALING_PATHWAY	-0.167773	6.99963
Selective	GO_LYMPHOCYTE_DIFFERENTIATION	-0.0810734	6.99976
Selective	GO_ERK1_AND_ERK2_CASCADE	-0.000157547	6.99941
Selective	GO_CAMERA_TYPE_EYE_DEVELOPMENT	-0.00893495	6.99945
Selective	GO_SENSORY_SYSTEM_DEVELOPMENT	-0.00282999	6.99978
Selective	GO_REGULATION_OF_DNA_BINDING_TRANSCRIPTION_FACTOR_ACTIVITY	-0.227151	6.99993
Selective	GO_EPITHELIAL_TUBE_MORPHOGENESIS	-0.00731869	6.99959

## Sheet: CRISPR
Gene set	Pathway	Signed logP (Efficacy)	Signed logP (Selectivity)
Selective & Essential	REACTOME_CELLULAR_RESPONSES_TO_STRESS	-7	6.99991
Selective & Essential	REACTOME_TRANSCRIPTIONAL_REGULATION_BY_TP53	-7	6.9997
Selective & Essential	REACTOME_DISEASES_OF_SIGNAL_TRANSDUCTION	-7	6.99981
Selective & Essential	REACTOME_INTRACELLULAR_SIGNALING_BY_SECOND_MESSENGERS	-7	6.9993
Selective & Essential	GO_PEPTIDYL_LYSINE_MODIFICATION	-7	6.99974
Selective & Essential	GO_IN_UTERO_EMBRYONIC_DEVELOPMENT	-7	6.99957
Selective & Essential	GO_NEGATIVE_REGULATION_OF_CELL_CYCLE_PROCESS	-7	6.9995
Selective & Essential	GO_RESPONSE_TO_OXYGEN_LEVELS	-7	6.99976
Selective & Essential	GO_COVALENT_CHROMATIN_MODIFICATION	-7	6.99993
Selective & Essential	GO_NEGATIVE_REGULATION_OF_MITOTIC_CELL_CYCLE	-7	6.99932
Selective & Essential	GO_RESPONSE_TO_RADIATION	-7	6.99991
Selective & Essential	GO_MITOCHONDRION_ORGANIZATION	-7	6.99996
Selective & Essential	GO_REGULATION_OF_CHROMOSOME_ORGANIZATION	-7	6.99953
Selective & Essential	GO_REGULATION_OF_CELL_CYCLE_PHASE_TRANSITION	-7	6.9999
Selective & Essential	GO_METHYLATION	-7	6.99949
Selective & Essential	GO_POSITIVE_REGULATION_OF_CELL_CYCLE	-7	6.99979
Selective & Essential	GO_REGULATION_OF_GENE_EXPRESSION_EPIGENETIC	-7	6.9994
Selective & Essential	GO_NUCLEAR_CHROMATIN	-7	6.99969
Selective & Essential	GO_UBIQUITIN_LIKE_PROTEIN_LIGASE_BINDING	-7	6.99925
Selective & Essential	GO_CHROMATIN_BINDING	-7	6.99997
Selective & Essential	GO_TRANSCRIPTION_COACTIVATOR_ACTIVITY	-7	6.9994
Selective & Essential	GO_REGULATION_OF_NUCLEOBASE_CONTAINING_COMPOUND_METABOLIC_PROCESS	-7	6.99996
Selective & Essential	GO_DNA_BINDING_TRANSCRIPTION_FACTOR_BINDING	-7	6.99955
Essential	REACTOME_CHROMOSOME_MAINTENANCE	-7	0.0756433
Essential	REACTOME_HIV_INFECTION	-7	0.111525
Essential	REACTOME_HOST_INTERACTIONS_OF_HIV_FACTORS	-7	0.205468
Essential	REACTOME_NUCLEAR_ENVELOPE_BREAKDOWN	-6.99985	0.153701
Essential	REACTOME_SUMOYLATION_OF_UBIQUITINYLATION_PROTEINS	-6.9992	0.100168
Essential	REACTOME_SUMOYLATION_OF_RNA_BINDING_PROTEINS	-6.99971	0.138014
Essential	REACTOME_DEGRADATION_OF_AXIN	-6.9999	0.243833
Essential	REACTOME_SIGNALING_BY_HEDGEHOG	-7	0.235998
Essential	REACTOME_HEDGEHOG_OFF_STATE	-7	0.171579
Essential	REACTOME_DISORDERS_OF_TRANSMEMBRANE_TRANSPORTERS	-7	0.0389476
Essential	REACTOME_HEDGEHOG_ON_STATE	-7	0.167149
Essential	REACTOME_GLOBAL_GENOME_NUCLEOTIDE_EXCISION_REPAIR_GG_NER	-7	0.249185
Essential	REACTOME_RNA_POLYMERASE_I_TRANSCRIPTION	-7	0.165222
Essential	GO_TRNA_METABOLIC_PROCESS	-7	0.0668608
Essential	GO_TRANSLATIONAL_TERMINATION	-7	0.117855
Essential	GO_NUCLEIC_ACID_PHOSPHODIESTER_BOND_HYDROLYSIS	-7	0.0866308
Essential	GO_NUCLEOBASE_CONTAINING_COMPOUND_TRANSPORT	-7	0.154144
Essential	GO_PROTEIN_FOLDING	-7	0.170376
Essential	GO_TRANSLATIONAL_ELONGATION	-7	0.182774
Essential	GO_NEGATIVE_REGULATION_OF_CELL_CYCLE_G2_M_PHASE_TRANSITION	-7	0.222454
Essential	GO_RNA_LOCALIZATION	-7	0.0665435
Essential	GO_TRNA_PROCESSING	-7	0.135193
Essential	GO_CONDENSED_NUCLEAR_CHROMOSOME	-7	0.103914
Essential	GO_RNA_POLYMERASE_COMPLEX	-7	0.194554
Essential	GO_PURINE_NTP_DEPENDENT_HELICASE_ACTIVITY	-6.99998	0.207154
Essential	GO_UNFOLDED_PROTEIN_BINDING	-7	0.104587
Essential	GO_TRANSLATION_INITIATION_FACTOR_ACTIVITY	-6.99967	0.0903335
Essential	GO_HELICASE_ACTIVITY	-7	0.156915
Essential	GO_RIBONUCLEOPROTEIN_COMPLEX_BINDING	-7	0.232453
Essential	GO_TRANSLATION_FACTOR_ACTIVITY_RNA_BINDING	-6.99999	0.158954
Essential	GO_SINGLE_STRANDED_DNA_BINDING	-7	0.1255
Essential	GO_RIBONUCLEASE_ACTIVITY	-7	0.187651
Essential	GO_NUCLEOTIDYLTRANSFERASE_ACTIVITY	-7	0.229879
Essential	GO_RNA_EXPORT_FROM_NUCLEUS	-7	0.157314
Essential	GO_PROTEIN_CONTAINING_COMPLEX_LOCALIZATION	-7	0.0852739
Essential	GO_MRNA_TRANSPORT	-7	0.12231
Essential	GO_ESTABLISHMENT_OF_RNA_LOCALIZATION	-7	0.189055
Essential	GO_NCRNA_EXPORT_FROM_NUCLEUS	-6.99909	0.161363
Essential	HALLMARK_DNA_REPAIR	-7	0.18353
Selective	GO_MUSCLE_TISSUE_DEVELOPMENT	-0.00908881	6.99976
Selective	GO_LEUKOCYTE_DIFFERENTIATION	-0.0285264	6.99997
Selective	GO_FOREBRAIN_DEVELOPMENT	-0.0525932	6.99974
Selective	GO_AMEBOIDAL_TYPE_CELL_MIGRATION	-0.015341	6.99976
Selective	GO_CELL_SUBSTRATE_ADHESION	-0.0157945	6.99939
Selective	GO_POSITIVE_REGULATION_OF_CELL_ADHESION	-0.0440457	6.9998
Selective	GO_RAS_PROTEIN_SIGNAL_TRANSDUCTION	-0.0247641	6.9999
Selective	GO_UROGENITAL_SYSTEM_DEVELOPMENT	-0.0112859	6.99943
Selective	GO_REGULATION_OF_MAP_KINASE_ACTIVITY	-0.0855169	6.99955
Selective	GO_SENSORY_ORGAN_DEVELOPMENT	-9.64144e-06	6.99997
Selective	GO_EPITHELIAL_CELL_PROLIFERATION	-0.0224416	6.99972
Selective	GO_STRESS_ACTIVATED_PROTEIN_KINASE_SIGNALING_CASCADE	-0.158252	6.9992
Selective	GO_EMBRYONIC_ORGAN_DEVELOPMENT	-0.0701061	6.99988
Selective	GO_CELL_GROWTH	-0.0358572	6.99993
Selective	GO_TRANSMEMBRANE_RECEPTOR_PROTEIN_SERINE_THREONINE_KINASE_SIGNALING_PATHWAY	-0.12414	6.99943
Selective	GO_LYMPHOCYTE_DIFFERENTIATION	-0.04694	6.99961
Selective	GO_SENSORY_SYSTEM_DEVELOPMENT	-0.00206393	6.99965
Selective	GO_REGULATION_OF_DNA_BINDING_TRANSCRIPTION_FACTOR_ACTIVITY	-0.135238	6.99987
Selective	GO_EPITHELIAL_TUBE_MORPHOGENESIS	-0.00543959	6.99936

## Sheet: Overrep_in_Essential
Pathway	shRNA	80:20	60:40	40:60	20:80	CRISPR
KEGG_OXIDATIVE_PHOSPHORYLATION	1	1	0	0	0	0
REACTOME_ANTIVIRAL_MECHANISM_BY_IFN_STIMULATED_GENES	1	1	0	0	0	0
REACTOME_TRANSPORT_OF_MATURE_TRANSCRIPT_TO_CYTOPLASM	1	1	1	1	0	0
REACTOME_RECRUITMENT_OF_NUMA_TO_MITOTIC_CENTROSOMES	1	1	1	0	0	0
REACTOME_HIV_INFECTION	1	0	1	0	1	1
REACTOME_HIV_LIFE_CYCLE	1	0	0	0	0	0
REACTOME_MITOTIC_PROMETAPHASE	1	1	0	0	0	0
REACTOME_SIGNALING_BY_FGFR	1	0	0	0	0	0
REACTOME_REGULATION_OF_PLK1_ACTIVITY_AT_G2_M_TRANSITION	1	0	0	0	0	0
REACTOME_CENTROSOME_MATURATION	1	1	1	0	0	0
REACTOME_INTERLEUKIN_1_FAMILY_SIGNALING	1	0	0	0	0	0
REACTOME_DISORDERS_OF_TRANSMEMBRANE_TRANSPORTERS	1	1	1	1	1	1
REACTOME_HDR_THROUGH_HOMOLOGOUS_RECOMBINATION_HRR	1	0	1	0	0	0
REACTOME_GLOBAL_GENOME_NUCLEOTIDE_EXCISION_REPAIR_GG_NER	1	0	0	1	1	1
REACTOME_RNA_POLYMERASE_II_PRE_TRANSCRIPTION_EVENTS	1	0	0	0	0	0
REACTOME_DUAL_INCISION_IN_TC_NER	1	0	0	0	0	0
REACTOME_PTEN_REGULATION	1	0	0	0	0	0
REACTOME_RNA_POLYMERASE_II_TRANSCRIBES_SNRNA_GENES	1	0	0	0	0	0
REACTOME_MITOTIC_SPINDLE_CHECKPOINT	1	1	0	0	0	0
REACTOME_TRNA_PROCESSING	1	0	0	1	1	0
REACTOME_THE_ROLE_OF_GTSE1_IN_G2_M_PROGRESSION_AFTER_G2_CHECKPOINT	1	0	0	0	0	0
REACTOME_GOLGI_TO_ER_RETROGRADE_TRANSPORT	1	1	0	0	0	0
GO_HEMATOPOIETIC_PROGENITOR_CELL_DIFFERENTIATION	1	0	0	0	0	0
GO_DNA_TEMPLATED_TRANSCRIPTION_ELONGATION	1	0	0	0	0	0
GO_REGULATION_OF_MRNA_CATABOLIC_PROCESS	1	0	0	0	0	0
GO_TELOMERE_ORGANIZATION	1	0	0	0	0	0
GO_MICROTUBULE_CYTOSKELETON_ORGANIZATION	1	0	0	0	0	0
GO_NUCLEIC_ACID_PHOSPHODIESTER_BOND_HYDROLYSIS	1	0	1	1	1	1
GO_INNATE_IMMUNE_RESPONSE_ACTIVATING_CELL_SURFACE_RECEPTOR_SIGNALING_PATHWAY	1	0	0	0	0	0
GO_AMINE_METABOLIC_PROCESS	1	0	0	0	0	0
GO_NCRNA_TRANSCRIPTION	1	0	0	0	0	0
GO_DNA_REPAIR	1	0	0	0	0	0
GO_FC_EPSILON_RECEPTOR_SIGNALING_PATHWAY	1	0	0	0	0	0
GO_CANONICAL_WNT_SIGNALING_PATHWAY	1	0	0	0	0	0
GO_TRANSCRIPTION_ELONGATION_FROM_RNA_POLYMERASE_II_PROMOTER	1	0	1	0	0	0
GO_PROTEIN_LOCALIZATION_TO_CHROMOSOME	1	0	0	0	0	0
GO_FC_RECEPTOR_SIGNALING_PATHWAY	1	0	0	0	0	0
GO_NUCLEOBASE_CONTAINING_COMPOUND_TRANSPORT	1	1	1	0	1	1
GO_NIK_NF_KAPPAB_SIGNALING	1	0	0	0	0	0
GO_NEGATIVE_REGULATION_OF_CHROMOSOME_ORGANIZATION	1	0	0	0	0	0
GO_TUMOR_NECROSIS_FACTOR_MEDIATED_SIGNALING_PATHWAY	1	1	1	0	0	0
GO_MULTI_ORGANISM_LOCALIZATION	1	1	1	1	1	0
GO_INTERLEUKIN_1_MEDIATED_SIGNALING_PATHWAY	1	0	0	0	0	0
GO_NEGATIVE_REGULATION_OF_CELL_CYCLE_G2_M_PHASE_TRANSITION	1	0	0	0	1	1
GO_REGULATION_OF_CELLULAR_AMIDE_METABOLIC_PROCESS	1	0	0	0	0	0
GO_REGULATION_OF_DNA_BIOSYNTHETIC_PROCESS	1	0	0	0	0	0
GO_POSITIVE_REGULATION_OF_CHROMOSOME_ORGANIZATION	1	0	0	0	0	0
GO_REGULATION_OF_POSTTRANSCRIPTIONAL_GENE_SILENCING	1	1	0	0	0	0
GO_NEGATIVE_REGULATION_OF_WNT_SIGNALING_PATHWAY	1	0	0	0	0	0
GO_REGULATION_OF_CARBOHYDRATE_CATABOLIC_PROCESS	1	0	0	0	0	0
GO_REGULATION_OF_RNA_SPLICING	1	0	0	0	0	0
GO_NUCLEAR_CHROMOSOME_TELOMERIC_REGION	1	0	1	0	0	0
GO_CHROMOSOME_CENTROMERIC_REGION	1	1	0	0	0	0
GO_NUCLEAR_SPECK	1	1	0	0	0	0
GO_CHROMOSOMAL_REGION	1	1	0	0	0	0
GO_SPINDLE_POLE	1	1	0	0	0	0
GO_CENTROSOME	1	1	0	0	0	0
GO_MITOCHONDRIAL_MATRIX	1	0	1	0	0	0
GO_RIBONUCLEOPROTEIN_GRANULE	1	1	0	0	0	0
GO_KINETOCHORE	1	1	0	0	0	0
GO_CONDENSED_CHROMOSOME_CENTROMERIC_REGION	1	1	0	0	0	0
GO_NUCLEAR_PORE	1	1	1	1	0	0
GO_ATPASE_ACTIVITY_COUPLED	1	1	0	0	0	0
GO_UNFOLDED_PROTEIN_BINDING	1	1	1	1	1	1
GO_SINGLE_STRANDED_DNA_BINDING	1	1	1	1	1	1
GO_TRANSLATION_REGULATOR_ACTIVITY_NUCLEIC_ACID_BINDING	1	0	1	0	0	0
GO_ATPASE_ACTIVITY	1	1	0	0	0	0
GO_MRNA_EXPORT_FROM_NUCLEUS	1	1	1	1	0	0
GO_SNRNA_TRANSCRIPTION	1	0	0	0	0	0
GO_PROTEIN_CONTAINING_COMPLEX_DISASSEMBLY	1	1	0	0	0	0
GO_NEGATIVE_REGULATION_OF_NUCLEOBASE_CONTAINING_COMPOUND_METABOLIC_PROCESS	1	0	0	0	0	0
GO_REGULATION_OF_MRNA_PROCESSING	1	0	0	0	0	0
GO_MRNA_TRANSPORT	1	1	1	0	1	1
GO_ESTABLISHMENT_OF_RNA_LOCALIZATION	1	1	0	0	1	1
GO_REGULATION_OF_RNA_METABOLIC_PROCESS	1	0	0	0	0	0
GO_OTHER_ORGANISM	1	1	1	1	0	0
ONCOGENIC_SIGNATURE_GCNP_SHH_UP_LATE.V1_UP	1	0	0	0	0	0
HALLMARK_OXIDATIVE_PHOSPHORYLATION	1	1	0	0	0	0
KEGG_PARKINSONS_DISEASE	0	1	1	0	0	0
REACTOME_DOWNSTREAM_SIGNALING_EVENTS_OF_B_CELL_RECEPTOR_BCR	0	1	0	0	0	0
REACTOME_GLYCOLYSIS	0	1	0	0	0	0
REACTOME_CHROMOSOME_MAINTENANCE	0	1	1	0	1	1
REACTOME_HOST_INTERACTIONS_OF_HIV_FACTORS	0	1	0	0	0	1
REACTOME_RESPIRATORY_ELECTRON_TRANSPORT_ATP_SYNTHESIS_BY_CHEMIOSMOTIC_COUPLING_AND_HEAT_PRODUCTION_BY_UNCOUPLING_PROTEINS	0	1	1	0	0	0
REACTOME_ORGANELLE_BIOGENESIS_AND_MAINTENANCE	0	1	1	0	0	0
REACTOME_ER_TO_GOLGI_ANTEROGRADE_TRANSPORT	0	1	0	0	0	0
REACTOME_EPIGENETIC_REGULATION_OF_GENE_EXPRESSION	0	1	0	0	0	0
REACTOME_RESOLUTION_OF_SISTER_CHROMATID_COHESION	0	1	0	0	0	0
REACTOME_NEGATIVE_EPIGENETIC_REGULATION_OF_RRNA_EXPRESSION	0	1	0	0	1	0
REACTOME_COPI_MEDIATED_ANTEROGRADE_TRANSPORT	0	1	0	0	0	0
REACTOME_INTRA_GOLGI_AND_RETROGRADE_GOLGI_TO_ER_TRAFFIC	0	1	0	0	0	0
REACTOME_AURKA_ACTIVATION_BY_TPX2	0	1	1	0	0	0
REACTOME_NEDDYLATION	0	1	0	0	0	0
REACTOME_INTERLEUKIN_1_SIGNALING	0	1	0	0	0	0
GO_DNA_DEPENDENT_DNA_REPLICATION	0	1	0	0	0	0
GO_CHROMOSOME_SEPARATION	0	1	0	0	0	0
GO_CELLULAR_AMINO_ACID_METABOLIC_PROCESS	0	1	1	0	0	0
GO_DNA_CONFORMATION_CHANGE	0	1	0	0	0	0
GO_OXIDATIVE_PHOSPHORYLATION	0	1	0	0	0	0
GO_MEIOTIC_CELL_CYCLE	0	1	0	0	0	0
GO_NUCLEUS_ORGANIZATION	0	1	0	0	0	0
GO_GOLGI_VESICLE_TRANSPORT	0	1	0	0	0	0
GO_RECOMBINATIONAL_REPAIR	0	1	0	0	0	0
GO_METHYLATION	0	1	0	0	0	0
GO_MACROMOLECULE_METHYLATION	0	1	0	0	0	0
GO_DNA_PACKAGING	0	1	0	0	0	0
GO_GENE_SILENCING_BY_RNA	0	1	0	0	0	0
GO_REGULATION_OF_GENE_SILENCING	0	1	0	0	0	0
GO_RNA_POLYMERASE_COMPLEX	0	1	0	0	1	1
GO_INNER_MITOCHONDRIAL_MEMBRANE_PROTEIN_COMPLEX	0	1	1	0	0	0
GO_CHROMOSOME_TELOMERIC_REGION	0	1	0	0	0	0
GO_SPINDLE	0	1	0	0	0	0
GO_MRNA_BINDING	0	1	0	0	0	0
GO_RNA_POLYMERASE_BINDING	0	1	0	0	0	0
GO_RNA_EXPORT_FROM_NUCLEUS	0	1	1	0	1	1
GO_ENDOPLASMIC_RETICULUM_TO_GOLGI_VESICLE_MEDIATED_TRANSPORT	0	1	0	0	0	0
GO_PROTEIN_CONTAINING_COMPLEX_LOCALIZATION	0	1	1	0	1	1
GO_ATP_SYNTHESIS_COUPLED_ELECTRON_TRANSPORT	0	1	0	0	0	0
GO_MICROTUBULE_CYTOSKELETON_ORGANIZATION_INVOLVED_IN_MITOSIS	0	1	0	0	0	0
GO_FIBRILLAR_CENTER	0	1	0	0	0	0
ONCOGENIC_SIGNATURE_CAMP_UP.V1_UP	0	1	1	0	0	0
KEGG_PURINE_METABOLISM	0	0	1	0	0	0
REACTOME_BASE_EXCISION_REPAIR	0	0	1	1	1	0
REACTOME_MITOCHONDRIAL_PROTEIN_IMPORT	0	0	1	0	0	0
REACTOME_DEADENYLATION_DEPENDENT_MRNA_DECAY	0	0	1	0	0	0
REACTOME_RESPIRATORY_ELECTRON_TRANSPORT	0	0	1	0	0	0
REACTOME_GLUCOSE_METABOLISM	0	0	1	0	0	0
REACTOME_TELOMERE_MAINTENANCE	0	0	1	1	0	0
REACTOME_GENE_SILENCING_BY_RNA	0	0	1	1	1	0
REACTOME_NUCLEAR_ENVELOPE_BREAKDOWN	0	0	1	1	0	1
REACTOME_SIGNALING_BY_HEDGEHOG	0	0	1	0	0	1
REACTOME_TRANSCRIPTIONAL_REGULATION_BY_SMALL_RNAS	0	0	1	1	0	0
REACTOME_DECTIN_1_MEDIATED_NONCANONICAL_NF_KB_SIGNALING	0	0	1	0	0	0
REACTOME_TNFR2_NON_CANONICAL_NF_KB_PATHWAY	0	0	1	0	0	0
REACTOME_MAPK6_MAPK4_SIGNALING	0	0	1	1	1	0
GO_CELLULAR_PROTEIN_COMPLEX_DISASSEMBLY	0	0	1	0	0	0
GO_MITOCHONDRIAL_RESPIRATORY_CHAIN_COMPLEX_ASSEMBLY	0	0	1	0	0	0
GO_POSTREPLICATION_REPAIR	0	0	1	1	0	0
GO_REGULATION_OF_CELLULAR_KETONE_METABOLIC_PROCESS	0	0	1	0	0	0
GO_MRNA_3_END_PROCESSING	0	0	1	0	0	0
GO_RNA_SPLICING_VIA_TRANSESTERIFICATION_REACTIONS	0	0	1	0	1	0
GO_DNA_SYNTHESIS_INVOLVED_IN_DNA_REPAIR	0	0	1	1	0	0
GO_RNA_3_END_PROCESSING	0	0	1	0	0	0
GO_RNA_CATABOLIC_PROCESS	0	0	1	0	0	0
GO_RNA_LOCALIZATION	0	0	1	0	1	1
GO_RNA_SPLICING	0	0	1	0	0	0
GO_PROTEIN_TARGETING_TO_MITOCHONDRION	0	0	1	0	0	0
GO_ORGANELLE_INNER_MEMBRANE	0	0	1	0	0	0
GO_MITOCHONDRIAL_MEMBRANE_PART	0	0	1	0	0	0
GO_CONDENSED_CHROMOSOME	0	0	1	0	0	0
GO_MITOCHONDRIAL_PROTEIN_COMPLEX	0	0	1	0	0	0
GO_TRNA_BINDING	0	0	1	1	0	0
GO_RIBONUCLEOPROTEIN_COMPLEX_BINDING	0	0	1	0	0	1
GO_TRANSLATION_FACTOR_ACTIVITY_RNA_BINDING	0	0	1	0	1	1
GO_METAL_CLUSTER_BINDING	0	0	1	0	0	0
GO_RIBONUCLEASE_ACTIVITY	0	0	1	1	1	1
GO_RESPIRATORY_ELECTRON_TRANSPORT_CHAIN	0	0	1	0	0	0
GO_NUCLEAR_DNA_REPLICATION	0	0	1	0	0	0
GO_TRANSPORT_OF_VIRUS	0	0	1	1	0	0
GO_RESPIRASOME	0	0	1	0	0	0
GO_RESPIRATORY_CHAIN_COMPLEX	0	0	1	0	0	0
GO_TETHERING_COMPLEX	0	0	1	0	0	0
GO_PEPTIDASE_COMPLEX	0	0	1	0	0	0
HALLMARK_UNFOLDED_PROTEIN_RESPONSE	0	0	1	0	0	0
KEGG_RNA_DEGRADATION	0	0	0	1	0	0
REACTOME_NUCLEOTIDE_EXCISION_REPAIR	0	0	0	1	1	0
REACTOME_HOST_INTERACTIONS_WITH_INFLUENZA_FACTORS	0	0	0	1	0	0
REACTOME_AUF1_HNRNP_D0_BINDS_AND_DESTABILIZES_MRNA	0	0	0	1	0	0
REACTOME_SUMOYLATION_OF_RNA_BINDING_PROTEINS	0	0	0	1	1	1
REACTOME_SUMOYLATION_OF_DNA_REPLICATION_PROTEINS	0	0	0	1	0	0
REACTOME_MITOCHONDRIAL_TRANSLATION	0	0	0	1	1	0
REACTOME_HEDGEHOG_ON_STATE	0	0	0	1	1	1
REACTOME_INFECTIOUS_DISEASE	0	0	0	1	1	0
REACTOME_RNA_POLYMERASE_I_TRANSCRIPTION	0	0	0	1	1	1
GO_TRNA_METABOLIC_PROCESS	0	0	0	1	1	1
GO_MITOCHONDRIAL_TRANSLATION	0	0	0	1	0	0
GO_TRANSLATIONAL_TERMINATION	0	0	0	1	1	1
GO_PROTEIN_TARGETING_TO_MEMBRANE	0	0	0	1	0	0
GO_RNA_MODIFICATION	0	0	0	1	1	0
GO_PROTEIN_FOLDING	0	0	0	1	1	1
GO_ANTIGEN_PROCESSING_AND_PRESENTATION_OF_EXOGENOUS_PEPTIDE_ANTIGEN_VIA_MHC_CLASS_I	0	0	0	1	1	0
GO_TRANSLATIONAL_ELONGATION	0	0	0	1	1	1
GO_RNA_POLYADENYLATION	0	0	0	1	0	0
GO_TRNA_PROCESSING	0	0	0	1	1	1
GO_CONDENSED_NUCLEAR_CHROMOSOME	0	0	0	1	1	1
GO_ORGANELLAR_RIBOSOME	0	0	0	1	0	0
GO_SPLICEOSOMAL_COMPLEX	0	0	0	1	0	0
GO_POLYSOME	0	0	0	1	1	0
GO_TRANSLATION_INITIATION_FACTOR_ACTIVITY	0	0	0	1	1	1
GO_NUCLEOTIDYLTRANSFERASE_ACTIVITY	0	0	0	1	1	1
GO_VIRAL_GENE_EXPRESSION	0	0	0	1	0	0
GO_MITOCHONDRIAL_TRANSLATIONAL_TERMINATION	0	0	0	1	0	0
GO_MITOCHONDRIAL_GENE_EXPRESSION	0	0	0	1	0	0
REACTOME_SUMOYLATION_OF_UBIQUITINYLATION_PROTEINS	0	0	0	0	1	1
REACTOME_PCP_CE_PATHWAY	0	0	0	0	1	0
REACTOME_HEDGEHOG_OFF_STATE	0	0	0	0	1	1
REACTOME_DNA_DAMAGE_BYPASS	0	0	0	0	1	0
GO_CAJAL_BODY	0	0	0	0	1	0
GO_PURINE_NTP_DEPENDENT_HELICASE_ACTIVITY	0	0	0	0	1	1
GO_HELICASE_ACTIVITY	0	0	0	0	1	1
GO_RNA_HELICASE_ACTIVITY	0	0	0	0	1	0
HALLMARK_DNA_REPAIR	0	0	0	0	1	1
HALLMARK_MYC_TARGETS_V1	0	0	0	0	1	0
REACTOME_DEGRADATION_OF_AXIN	0	0	0	0	0	1
GO_NCRNA_EXPORT_FROM_NUCLEUS	0	0	0	0	0	1

## Sheet: Overrep_in_Selective
Pathway	shRNA	80:20	60:40	40:60	20:80	CRISPR
GO_MUSCLE_TISSUE_DEVELOPMENT	0	0	0	1	1	1
GO_REGULATION_OF_DEVELOPMENTAL_GROWTH	0	0	0	1	0	0
GO_POSITIVE_REGULATION_OF_MAPK_CASCADE	0	0	0	1	1	0
GO_LEUKOCYTE_DIFFERENTIATION	0	0	0	1	1	1
GO_FOREBRAIN_DEVELOPMENT	0	0	0	1	1	1
GO_AMEBOIDAL_TYPE_CELL_MIGRATION	0	0	0	1	1	1
GO_CELL_SUBSTRATE_ADHESION	0	0	0	1	1	1
GO_REGULATION_OF_LIPID_METABOLIC_PROCESS	0	0	0	1	1	0
GO_REGULATION_OF_SMALL_GTPASE_MEDIATED_SIGNAL_TRANSDUCTION	0	0	0	1	1	0
GO_POSITIVE_REGULATION_OF_CELL_ADHESION	0	0	0	1	1	1
GO_RAS_PROTEIN_SIGNAL_TRANSDUCTION	0	0	0	1	1	1
GO_UROGENITAL_SYSTEM_DEVELOPMENT	0	0	0	1	1	1
GO_REGULATION_OF_MAP_KINASE_ACTIVITY	0	0	0	1	1	1
GO_SENSORY_ORGAN_DEVELOPMENT	0	0	0	1	1	1
GO_RESPONSE_TO_TOXIC_SUBSTANCE	0	0	0	1	1	0
GO_EPITHELIAL_CELL_PROLIFERATION	0	0	0	1	1	1
GO_EMBRYONIC_ORGAN_DEVELOPMENT	0	0	0	1	1	1
GO_REGULATION_OF_GTPASE_ACTIVITY	0	0	0	1	0	0
GO_CELL_GROWTH	0	0	0	1	1	1
GO_TRANSMEMBRANE_RECEPTOR_PROTEIN_SERINE_THREONINE_KINASE_SIGNALING_PATHWAY	0	0	0	1	1	1
GO_LYMPHOCYTE_DIFFERENTIATION	0	0	0	1	1	1
GO_ENZYME_ACTIVATOR_ACTIVITY	0	0	0	1	0	0
GO_CAMERA_TYPE_EYE_DEVELOPMENT	0	0	0	1	1	0
GO_SENSORY_SYSTEM_DEVELOPMENT	0	0	0	1	1	1
GO_EPITHELIAL_TUBE_MORPHOGENESIS	0	0	0	1	1	1
GO_REGULATION_OF_SUPRAMOLECULAR_FIBER_ORGANIZATION	0	0	0	1	0	0
KEGG_MAPK_SIGNALING_PATHWAY	0	0	0	0	1	0
GO_CELL_JUNCTION_ORGANIZATION	0	0	0	0	1	0
GO_TISSUE_MIGRATION	0	0	0	0	1	0
GO_STRESS_ACTIVATED_PROTEIN_KINASE_SIGNALING_CASCADE	0	0	0	0	1	1
GO_DEVELOPMENTAL_MATURATION	0	0	0	0	1	0
GO_ERK1_AND_ERK2_CASCADE	0	0	0	0	1	0
GO_REGULATION_OF_DNA_BINDING_TRANSCRIPTION_FACTOR_ACTIVITY	0	0	0	0	1	1

## Sheet: Overrep_in_Selective-essential
Pathway	shRNA	80:20	60:40	40:60	20:80	CRISPR
REACTOME_SIGNALING_BY_RHO_GTPASES	0	0	0	1	0	0
REACTOME_CELL_CYCLE_MITOTIC	0	0	0	1	0	0
REACTOME_RHO_GTPASE_EFFECTORS	0	0	0	1	0	0
REACTOME_CELLULAR_RESPONSES_TO_STRESS	0	0	0	1	1	1
REACTOME_TRANSCRIPTIONAL_REGULATION_BY_TP53	0	0	0	1	1	1
REACTOME_OTHER_INTERLEUKIN_SIGNALING	0	0	0	1	0	0
REACTOME_DISEASES_OF_SIGNAL_TRANSDUCTION	0	0	0	1	1	1
REACTOME_MAPK_FAMILY_SIGNALING_CASCADES	0	0	0	1	0	0
REACTOME_INTRACELLULAR_SIGNALING_BY_SECOND_MESSENGERS	0	0	0	1	1	1
GO_REGULATION_OF_WNT_SIGNALING_PATHWAY	0	0	0	1	1	0
GO_PEPTIDYL_LYSINE_MODIFICATION	0	0	0	1	1	1
GO_IN_UTERO_EMBRYONIC_DEVELOPMENT	0	0	0	1	1	1
GO_NEGATIVE_REGULATION_OF_CELL_CYCLE_PROCESS	0	0	0	1	1	1
GO_RESPONSE_TO_OXYGEN_LEVELS	0	0	0	1	1	1
GO_COVALENT_CHROMATIN_MODIFICATION	0	0	0	1	1	1
GO_NEGATIVE_REGULATION_OF_MITOTIC_CELL_CYCLE	0	0	0	1	1	1
GO_MITOCHONDRION_ORGANIZATION	0	0	0	1	1	1
GO_REGULATION_OF_CHROMOSOME_ORGANIZATION	0	0	0	1	1	1
GO_REGULATION_OF_CELL_CYCLE_PHASE_TRANSITION	0	0	0	1	1	1
GO_METHYLATION	0	0	0	1	1	1
GO_POSITIVE_REGULATION_OF_CELL_CYCLE	0	0	0	1	1	1
GO_REGULATION_OF_GENE_EXPRESSION_EPIGENETIC	0	0	0	1	1	1
GO_NUCLEAR_CHROMATIN	0	0	0	1	1	1
GO_TRANSCRIPTION_FACTOR_COMPLEX	0	0	0	1	1	0
GO_UBIQUITIN_LIKE_PROTEIN_LIGASE_BINDING	0	0	0	1	1	1
GO_CHROMATIN_BINDING	0	0	0	1	1	1
GO_TRANSCRIPTION_COACTIVATOR_ACTIVITY	0	0	0	1	1	1
GO_REGULATION_OF_NUCLEOBASE_CONTAINING_COMPOUND_METABOLIC_PROCESS	0	0	0	1	1	1
GO_CELL_CELL_SIGNALING_BY_WNT	0	0	0	1	0	0
GO_DNA_BINDING_TRANSCRIPTION_FACTOR_BINDING	0	0	0	1	1	1
REACTOME_CHROMATIN_ORGANIZATION	0	0	0	0	1	0
REACTOME_DEUBIQUITINATION	0	0	0	0	1	0
GO_PROTEIN_MODIFICATION_BY_SMALL_PROTEIN_REMOVAL	0	0	0	0	1	0
GO_POSITIVE_REGULATION_OF_CELL_CYCLE_PROCESS	0	0	0	0	1	0
GO_RESPONSE_TO_RADIATION	0	0	0	0	1	1
GO_SIGNAL_TRANSDUCTION_BY_P53_CLASS_MEDIATOR	0	0	0	0	1	0
GO_MACROMOLECULE_METHYLATION	0	0	0	0	1	0
GO_RNA_POLYMERASE_II_SPECIFIC_DNA_BINDING_TRANSCRIPTION_FACTOR_BINDING	0	0	0	0	1	0
