# Supplementary material for: shinyDepMap, a tool to identify targetable cancer genes and their functional connections from Cancer Dependency Map data
Source: eLife. 2021 Feb 8;10:e57116. doi: 10.7554/eLife.57116 (PMC7924953; doi:10.7554/eLife.57116)
Supplement: Figure 4—source data 1. [file elife-57116-fig4-data1.xlsx]

## Sheet: shRNA
EntrezID	GeneSymbol	bone	breast	central_nervous_system	colorectal	esophagus	gastric	kidney	leukemia	liver	lung	multiple_myeloma	ovary	pancreas	skin	upper_aerodigestive	urinary_tract	uterus	n_dependent_lineage	is_commonly_essential
1	A1BG	0	0	0	0	0	0	0	0	0	0	0	0	0	0	0	0	0	0	FALSE
29974	A1CF	0	0	0	0	0	0	0	0	0	0	0	0	0	0	0	0	0	0	FALSE
2	A2M	0	0	0	0	0	0	0	0	0	0	0	0	0	0	0	0	0	0	FALSE
144568	A2ML1	0	0	0	0	0	0	0	0	0	0	0	0	0	0	0	0	0	0	FALSE
53947	A4GALT	0	0	0	0	0	0	0	0	0	0	0	0	0	0	0	0	0	0	FALSE
51146	A4GNT	0	0	0	0	0	0	0	0	0	0	0	0	0	0	0	0	0	0	FALSE
8086	AAAS	0	0	0	0	0	0	0	0	0	0	0	0	0	0	0	0	0	0	FALSE
65985	AACS	0	0	0	0	0	0	0	0	0	0	0	0	0	0	0	0	0	0	FALSE
13	AADAC	0	0	0	0	0	0	0	0	0	0	0	0	0	0	0	0	0	0	FALSE
344752	AADACL2	0	0	0	0	0	0	0	0	0	0	0	0	0	0	0	0	0	0	FALSE
343066	AADACL4	0	0	0	0	0	0	0	0	0	0	0	0	0	0	0	0	0	0	FALSE
51166	AADAT	0	0	0	0	0	0	0	0	0	0	0	0	0	0	0	0	0	0	FALSE
195827	PRXL2C	0	0	0	0	0	0	0	0	0	0	0	0	0	0	0	0	0	0	FALSE
79719	AAGAB	0	0	0	0	0	0	0	0	0	0	0	0	0	0	0	0	0	0	FALSE
22848	AAK1	0	0	0	0	0	0	0	0	0	0	0	0	0	0	0	0	0	0	FALSE
28971	AAMDC	0	0	0	0	0	0	0	0	0	0	0	0	0	0	0	0	0	0	FALSE
14	AAMP	0	0	0	0	0	0	0	0	0	0	0	0	0	0	0	0	0	0	FALSE
15	AANAT	0	0	0	0	0	0	0	0	0	0	0	0	0	0	0	0	0	0	FALSE
25980	AAR2	0	0	0	0	0	0	0	0	0	0	0	0	0	0	0	0	0	0	FALSE
441376	AARD	0	0	0	0	0	0	0	0	0	0	0	0	0	0	0	0	0	0	FALSE
16	AARS	0	0	0	0	0	0	0	0	1	0	0	0	0	0	0	0	0	1	FALSE
57505	AARS2	0	0	0	0	0	0	0	0	0	0	0	0	0	0	0	0	0	0	FALSE
132949	AASDH	0	0	0	0	0	0	0	0	0	0	0	0	0	0	0	0	0	0	FALSE
60496	AASDHPPT	0	0	0	0	0	0	0	0	0	0	0	0	0	0	0	0	0	0	FALSE
10157	AASS	0	0	0	0	0	0	0	0	0	0	0	0	0	0	0	0	0	0	FALSE
26574	AATF	0	0	0	0	0	0	0	0	0	0	0	0	0	0	0	0	0	0	FALSE
9625	AATK	0	0	0	0	0	0	0	0	0	0	0	0	0	0	0	0	0	0	FALSE
18	ABAT	0	0	0	0	0	0	0	0	0	0	0	0	0	0	0	0	0	0	FALSE
19	ABCA1	0	0	0	0	0	0	0	0	0	0	0	0	0	0	0	0	0	0	FALSE
10349	ABCA10	0	0	0	0	0	0	0	0	0	0	0	0	0	0	0	0	0	0	FALSE
26154	ABCA12	0	0	0	0	0	0	0	0	0	0	0	0	0	0	0	0	0	0	FALSE
154664	ABCA13	0	0	0	0	0	0	0	0	0	0	0	0	0	0	0	0	0	0	FALSE
20	ABCA2	0	0	0	0	0	0	0	0	0	0	0	0	0	0	0	0	0	0	FALSE
21	ABCA3	0	0	0	0	0	0	0	0	0	0	0	0	0	0	0	0	0	0	FALSE
24	ABCA4	0	0	0	0	0	0	0	0	0	0	0	0	0	0	0	0	0	0	FALSE
23461	ABCA5	0	0	0	0	0	0	0	0	0	0	0	0	0	0	0	0	0	0	FALSE
23460	ABCA6	0	0	0	0	0	0	0	0	0	0	0	0	0	0	0	0	0	0	FALSE
10347	ABCA7	0	0	0	0	0	0	0	0	0	0	0	0	0	0	0	0	0	0	FALSE
10351	ABCA8	0	0	0	0	0	0	0	0	0	0	0	0	0	0	0	0	0	0	FALSE
10350	ABCA9	0	0	0	0	0	0	0	0	0	0	0	0	0	0	0	0	0	0	FALSE
5243	ABCB1	0	0	0	0	0	0	0	0	0	0	0	0	0	0	0	0	0	0	FALSE
23456	ABCB10	0	0	0	0	0	0	0	0	0	0	0	0	0	0	0	0	0	0	FALSE
8647	ABCB11	0	0	0	0	0	0	0	0	0	0	0	0	0	0	0	0	0	0	FALSE
5244	ABCB4	0	0	0	0	0	0	0	0	0	0	0	0	0	0	0	0	0	0	FALSE
340273	ABCB5	0	0	0	0	0	0	0	0	0	0	0	0	0	0	0	0	0	0	FALSE
10058	ABCB6	0	0	0	0	0	0	0	0	0	0	0	0	0	0	0	0	0	0	FALSE
22	ABCB7	0	1	1	1	1	0	0	0	0	1	0	1	0	1	1	1	1	10	FALSE
11194	ABCB8	0	0	0	0	0	0	0	0	0	0	0	0	0	0	0	0	0	0	FALSE
23457	ABCB9	0	0	0	0	0	0	0	0	0	0	0	0	0	0	0	0	0	0	FALSE
4363	ABCC1	0	0	0	0	0	0	0	0	0	0	0	0	0	0	0	0	0	0	FALSE
89845	ABCC10	0	0	0	0	0	0	0	0	0	0	0	0	0	0	0	0	0	0	FALSE
85320	ABCC11	0	0	0	0	0	0	0	0	0	0	0	0	0	0	0	0	0	0	FALSE
94160	ABCC12	0	0	0	0	0	0	0	0	0	0	0	0	0	0	0	0	0	0	FALSE
1244	ABCC2	0	0	0	0	0	0	0	0	0	0	0	0	0	0	0	0	0	0	FALSE
8714	ABCC3	0	0	0	0	0	0	0	0	0	0	0	0	0	0	0	0	0	0	FALSE
10257	ABCC4	0	0	0	0	0	0	0	0	0	0	0	0	0	0	0	0	0	0	FALSE
10057	ABCC5	0	0	0	0	0	0	0	0	0	0	0	0	0	0	0	0	0	0	FALSE
368	ABCC6	0	0	0	0	0	0	0	0	0	0	0	0	0	0	0	0	0	0	FALSE
6833	ABCC8	0	0	0	0	0	0	0	0	0	0	0	0	0	0	0	0	0	0	FALSE
10060	ABCC9	0	0	0	0	0	0	0	0	0	0	0	0	0	0	0	0	0	0	FALSE
215	ABCD1	0	0	0	0	0	0	0	0	0	0	0	0	0	0	0	0	0	0	FALSE
225	ABCD2	0	0	0	0	0	0	0	0	0	0	0	0	0	0	0	0	0	0	FALSE
5825	ABCD3	0	0	0	0	0	0	0	0	0	0	0	0	0	0	0	0	0	0	FALSE
5826	ABCD4	0	0	0	0	0	0	0	0	0	0	0	0	0	0	0	0	0	0	FALSE
6059	ABCE1	1	1	1	1	1	1	1	0	1	1	0	1	1	1	1	1	1	15	TRUE
23	ABCF1	0	0	0	0	0	0	0	0	0	0	0	0	0	0	0	0	0	0	FALSE
10061	ABCF2	0	0	0	0	0	0	0	0	0	0	0	0	0	0	0	0	0	0	FALSE
55324	ABCF3	0	0	0	0	0	0	0	0	0	0	0	0	0	0	0	0	0	0	FALSE
9619	ABCG1	0	0	0	0	0	0	0	0	0	0	0	0	0	0	0	0	0	0	FALSE
9429	ABCG2	0	0	0	0	0	0	0	0	0	0	0	0	0	0	0	0	0	0	FALSE
64137	ABCG4	0	0	0	0	0	0	0	0	0	0	0	0	0	0	0	0	0	0	FALSE
64240	ABCG5	0	0	0	0	0	0	0	0	0	0	0	0	0	0	0	0	0	0	FALSE
64241	ABCG8	0	0	0	0	0	0	0	0	0	0	0	0	0	0	0	0	0	0	FALSE
55347	ABHD10	0	0	0	0	0	0	0	0	0	0	0	0	0	0	0	0	0	0	FALSE
83451	ABHD11	0	0	0	0	0	0	0	0	0	0	0	0	0	0	0	0	0	0	FALSE
26090	ABHD12	0	0	0	0	0	0	0	0	0	0	0	0	0	0	0	0	0	0	FALSE
145447	ABHD12B	0	0	0	0	0	0	0	0	0	0	0	0	0	0	0	0	0	0	FALSE
84945	ABHD13	0	0	0	0	0	0	0	0	0	0	0	0	0	0	0	0	0	0	FALSE
25864	ABHD14A	0	0	0	0	0	0	0	0	0	0	0	0	0	0	0	0	0	0	FALSE
84836	ABHD14B	0	0	0	0	0	0	0	0	0	0	0	0	0	0	0	0	0	0	FALSE
116236	ABHD15	0	0	0	0	0	0	0	0	0	0	0	0	0	0	0	0	0	0	FALSE
7920	ABHD16A	0	0	0	0	0	0	0	0	0	0	0	0	0	0	0	0	0	0	FALSE
140701	ABHD16B	0	0	0	0	0	0	0	0	0	0	0	0	0	0	0	0	0	0	FALSE
81926	ABHD17A	0	0	0	0	0	0	0	0	0	0	0	0	0	0	0	0	0	0	FALSE
51104	ABHD17B	0	0	0	0	0	0	0	0	0	0	0	0	0	0	0	0	0	0	FALSE
11057	ABHD2	0	0	0	0	0	0	0	0	0	0	0	0	0	0	0	0	0	0	FALSE
171586	ABHD3	0	0	0	0	0	0	0	0	0	0	0	0	0	0	0	0	0	0	FALSE
63874	ABHD4	0	0	0	0	0	0	0	0	0	0	0	0	0	0	0	0	0	0	FALSE
51099	ABHD5	0	0	0	0	0	0	0	0	0	0	0	0	0	0	0	0	0	0	FALSE
57406	ABHD6	0	0	0	0	0	0	0	0	0	0	0	0	0	0	0	0	0	0	FALSE
79575	ABHD8	0	0	0	0	0	0	0	0	0	0	0	0	0	0	0	0	0	0	FALSE
10006	ABI1	0	0	0	0	0	0	0	0	0	0	0	0	0	0	0	0	0	0	FALSE
10152	ABI2	0	0	0	0	0	0	0	0	0	0	0	0	0	0	0	0	0	0	FALSE
51225	ABI3	0	0	0	0	0	0	0	0	0	0	0	0	0	0	0	0	0	0	FALSE
25	ABL1	0	0	0	0	0	0	0	0	0	0	0	0	0	0	0	0	0	0	FALSE
27	ABL2	0	0	0	0	0	0	0	0	0	0	0	0	0	0	0	0	0	0	FALSE
3983	ABLIM1	0	0	0	0	0	0	0	0	0	0	0	0	0	0	0	0	0	0	FALSE
84448	ABLIM2	0	0	0	0	0	0	0	0	0	0	0	0	0	0	0	0	0	0	FALSE
22885	ABLIM3	0	0	0	0	0	0	0	0	0	0	0	0	0	0	0	0	0	0	FALSE
29	ABR	0	0	0	0	0	0	0	0	0	0	0	0	0	0	0	0	0	0	FALSE
137735	ABRA	0	0	0	0	0	0	0	0	0	0	0	0	0	0	0	0	0	0	FALSE
84142	ABRAXAS1	0	0	0	0	0	0	0	0	0	0	0	0	0	0	0	0	0	0	FALSE
23172	ABRAXAS2	0	0	0	0	0	0	0	0	0	0	0	0	0	0	0	0	0	0	FALSE
29777	ABT1	0	0	0	0	0	0	0	0	0	0	0	0	0	0	0	0	0	0	FALSE
80325	ABTB1	0	0	0	0	0	0	0	0	0	0	0	0	0	0	0	0	0	0	FALSE
25841	ABTB2	0	0	0	0	0	0	0	0	0	0	0	0	0	0	0	0	0	0	FALSE
30	ACAA1	0	0	0	0	0	0	0	0	0	0	0	0	0	0	0	0	0	0	FALSE
10449	ACAA2	0	0	0	0	0	0	0	0	0	0	0	0	0	0	0	0	0	0	FALSE
31	ACACA	0	0	0	0	0	0	0	0	0	0	0	0	0	0	0	0	0	0	FALSE
32	ACACB	0	0	0	0	0	0	0	0	0	0	0	0	0	0	0	0	0	0	FALSE
80724	ACAD10	0	0	0	0	0	0	0	0	0	0	0	0	0	0	0	0	0	0	FALSE
84129	ACAD11	0	0	0	0	0	0	0	0	0	0	0	0	0	0	0	0	0	0	FALSE
27034	ACAD8	0	0	0	0	0	0	0	0	0	0	0	0	0	0	0	0	0	0	FALSE
28976	ACAD9	0	0	0	0	0	0	0	0	0	0	0	0	0	0	0	0	0	0	FALSE
33	ACADL	0	0	0	0	0	0	0	0	0	0	0	0	0	0	0	0	0	0	FALSE
34	ACADM	0	0	0	0	0	0	0	0	0	0	0	0	0	0	0	0	0	0	FALSE
35	ACADS	0	0	0	0	0	0	0	0	0	0	0	0	0	0	0	0	0	0	FALSE
36	ACADSB	0	0	0	0	0	0	0	0	0	0	0	0	0	0	0	0	0	0	FALSE
37	ACADVL	0	0	0	0	0	0	0	0	0	0	0	0	0	0	0	0	0	0	FALSE
176	ACAN	0	0	0	0	0	0	0	0	0	0	0	0	0	0	0	0	0	0	FALSE
9744	ACAP1	0	0	0	0	0	0	0	0	0	0	0	0	0	0	0	0	0	0	FALSE
23527	ACAP2	0	0	0	0	0	0	0	0	0	0	0	0	0	0	0	0	0	0	FALSE
116983	ACAP3	0	0	0	0	0	0	0	0	0	0	0	0	0	0	0	0	0	0	FALSE
38	ACAT1	0	0	0	0	0	0	0	0	0	0	0	0	0	0	0	0	0	0	FALSE
39	ACAT2	0	0	0	0	0	0	0	0	0	0	0	0	0	0	0	0	0	0	FALSE
64746	ACBD3	0	0	0	0	0	0	0	0	0	0	0	0	0	0	0	0	0	0	FALSE
79777	ACBD4	0	0	0	0	0	0	0	0	0	0	0	0	0	0	0	0	0	0	FALSE
91452	ACBD5	0	0	0	0	0	0	0	0	0	0	0	0	0	0	0	0	0	0	FALSE
84320	ACBD6	0	0	0	0	0	0	0	0	0	0	0	0	0	0	0	0	0	0	FALSE
84680	ACCS	0	0	0	0	0	0	0	0	0	0	0	0	0	0	0	0	0	0	FALSE
390110	ACCSL	0	0	0	0	0	0	0	0	0	0	0	0	0	0	0	0	0	0	FALSE
65057	ACD	0	0	0	0	0	0	0	0	0	0	0	0	0	0	0	0	0	0	FALSE
1636	ACE	0	0	0	0	0	0	0	0	0	0	0	0	0	0	0	0	0	0	FALSE
59272	ACE2	0	0	0	0	0	0	0	0	0	0	0	0	0	0	0	0	0	0	FALSE
125981	ACER1	0	0	0	0	0	0	0	0	0	0	0	0	0	0	0	0	0	0	FALSE
340485	ACER2	0	0	0	0	0	0	0	0	0	0	0	0	0	0	0	0	0	0	FALSE
55331	ACER3	0	0	0	0	0	0	0	0	0	0	0	0	0	0	0	0	0	0	FALSE
43	ACHE	0	0	0	0	0	0	0	0	0	0	0	0	0	0	0	0	0	0	FALSE
22985	ACIN1	0	0	0	0	0	0	0	0	0	0	0	0	0	0	0	0	0	0	FALSE
2532	ACKR1	0	0	0	0	0	0	0	0	0	0	0	0	0	0	0	0	0	0	FALSE
1238	ACKR2	0	0	0	0	0	0	0	0	0	0	0	0	0	0	0	0	0	0	FALSE
57007	ACKR3	0	0	0	0	0	0	0	0	0	0	0	0	0	0	0	0	0	0	FALSE
51554	ACKR4	0	0	0	0	0	0	0	0	0	0	0	0	0	0	0	0	0	0	FALSE
47	ACLY	0	0	0	0	0	0	0	0	0	0	0	0	0	0	0	0	0	0	FALSE
130013	ACMSD	0	0	0	0	0	0	0	0	0	0	0	0	0	0	0	0	0	0	FALSE
48	ACO1	0	0	0	0	0	0	0	0	0	0	0	0	0	0	0	0	0	0	FALSE
50	ACO2	0	1	0	0	0	0	0	0	0	0	0	0	0	0	0	0	0	1	FALSE
641371	ACOT1	0	0	0	0	0	0	0	0	0	0	0	0	0	0	0	0	0	0	FALSE
26027	ACOT11	0	0	0	0	0	0	0	0	0	0	0	0	0	0	0	0	0	0	FALSE
134526	ACOT12	0	0	0	0	0	0	0	0	0	0	0	0	0	0	0	0	0	0	FALSE
55856	ACOT13	0	0	0	0	0	0	0	0	0	0	0	0	0	0	0	0	0	0	FALSE
10965	ACOT2	0	0	0	0	0	0	0	0	0	0	0	0	0	0	0	0	0	0	FALSE
122970	ACOT4	0	0	0	0	0	0	0	0	0	0	0	0	0	0	0	0	0	0	FALSE
11332	ACOT7	0	0	0	0	0	0	0	0	0	0	0	0	0	0	0	0	0	0	FALSE
10005	ACOT8	0	0	0	0	0	0	0	0	0	0	0	0	0	0	0	0	0	0	FALSE
23597	ACOT9	0	0	0	0	0	0	0	0	0	0	0	0	0	0	0	0	0	0	FALSE
51	ACOX1	0	0	0	0	0	0	0	0	0	0	0	0	0	0	0	0	0	0	FALSE
8309	ACOX2	0	0	0	0	0	0	0	0	0	0	0	0	0	0	0	0	0	0	FALSE
8310	ACOX3	0	0	0	0	0	0	0	0	0	0	0	0	0	0	0	0	0	0	FALSE
55289	ACOXL	0	0	0	0	0	0	0	0	0	0	0	0	0	0	0	0	0	0	FALSE
52	ACP1	0	0	0	0	0	0	0	0	0	0	0	0	0	0	0	0	0	0	FALSE
53	ACP2	0	0	0	0	0	0	0	0	0	0	0	0	0	0	0	0	0	0	FALSE
54	ACP5	0	0	0	0	0	0	0	0	0	0	0	0	0	0	0	0	0	0	FALSE
51205	ACP6	0	0	0	0	0	0	0	0	0	0	0	0	0	0	0	0	0	0	FALSE
390928	ACP7	0	0	0	0	0	0	0	0	0	0	0	0	0	0	0	0	0	0	FALSE
55	ACPP	0	0	0	0	0	0	0	0	0	0	0	0	0	0	0	0	0	0	FALSE
49	ACR	0	0	0	0	0	0	0	0	0	0	0	0	0	0	0	0	0	0	FALSE
84519	ACRBP	0	0	0	0	0	0	0	0	0	0	0	0	0	0	0	0	0	0	FALSE
56	ACRV1	0	0	0	0	0	0	0	0	0	0	0	0	0	0	0	0	0	0	FALSE
23205	ACSBG1	0	0	0	0	0	0	0	0	0	0	0	0	0	0	0	0	0	0	FALSE
81616	ACSBG2	0	0	0	0	0	0	0	0	0	0	0	0	0	0	0	0	0	0	FALSE
80221	ACSF2	0	0	0	0	0	0	0	0	0	0	0	0	0	0	0	0	0	0	FALSE
197322	ACSF3	0	0	0	0	0	0	0	0	0	0	0	0	0	0	0	0	0	0	FALSE
2180	ACSL1	0	0	0	0	0	0	0	0	0	0	0	0	0	0	0	0	0	0	FALSE
2181	ACSL3	0	0	0	0	0	0	0	0	0	0	0	0	0	0	0	0	0	0	FALSE
2182	ACSL4	0	0	0	0	0	0	0	0	0	0	0	0	0	0	0	0	0	0	FALSE
51703	ACSL5	0	0	0	0	0	0	0	0	0	0	0	0	0	0	0	0	0	0	FALSE
23305	ACSL6	0	0	0	0	0	0	0	0	0	0	0	0	0	0	0	0	0	0	FALSE
116285	ACSM1	0	0	0	0	0	0	0	0	0	0	0	0	0	0	0	0	0	0	FALSE
348158	ACSM2B	0	0	0	0	0	0	0	0	0	0	0	0	0	0	0	0	0	0	FALSE
6296	ACSM3	0	0	0	0	0	0	0	0	0	0	0	0	0	0	0	0	0	0	FALSE
54988	ACSM5	0	0	0	0	0	0	0	0	0	0	0	0	0	0	0	0	0	0	FALSE
142827	ACSM6	0	0	0	0	0	0	0	0	0	0	0	0	0	0	0	0	0	0	FALSE
84532	ACSS1	0	0	0	0	0	0	0	0	0	0	0	0	0	0	0	0	0	0	FALSE
55902	ACSS2	0	0	0	0	0	0	0	0	0	0	0	0	0	0	0	0	0	0	FALSE
79611	ACSS3	0	0	0	0	0	0	0	0	0	0	0	0	0	0	0	0	0	0	FALSE
58	ACTA1	0	0	0	0	0	0	0	0	0	0	0	0	0	0	0	0	0	0	FALSE
59	ACTA2	0	0	0	0	0	0	0	0	0	0	0	0	0	0	0	0	0	0	FALSE
60	ACTB	0	0	0	0	0	0	0	0	0	0	0	0	0	0	0	0	0	0	FALSE
345651	ACTBL2	0	0	0	0	0	0	0	0	0	0	0	0	0	0	0	0	0	0	FALSE
70	ACTC1	0	0	0	0	0	0	0	0	0	0	0	0	0	0	0	0	0	0	FALSE
71	ACTG1	0	0	0	0	0	0	0	0	0	1	0	0	0	0	0	0	0	1	FALSE
72	ACTG2	0	1	1	1	0	0	0	0	0	1	0	0	0	0	0	1	0	5	FALSE
86	ACTL6A	1	1	1	1	0	1	0	1	1	1	1	0	0	1	0	0	0	10	FALSE
51412	ACTL6B	0	0	0	0	0	0	0	0	0	0	0	0	0	0	0	0	0	0	FALSE
10881	ACTL7A	0	0	0	0	0	0	0	0	0	0	0	0	0	0	0	0	0	0	FALSE
10880	ACTL7B	0	0	0	0	0	0	0	0	0	0	0	0	0	0	0	0	0	0	FALSE
81569	ACTL8	0	0	0	0	0	0	0	0	0	0	0	0	0	0	0	0	0	0	FALSE
284382	ACTL9	0	0	0	0	0	0	0	0	0	0	0	0	0	0	0	0	0	0	FALSE
87	ACTN1	0	0	0	0	0	0	0	0	0	0	0	0	0	0	0	0	0	0	FALSE
88	ACTN2	0	0	0	0	0	0	0	0	0	0	0	0	0	0	0	0	0	0	FALSE
81	ACTN4	0	0	0	0	0	0	0	0	0	0	0	0	0	0	0	0	0	0	FALSE
55860	ACTR10	0	0	0	0	0	0	0	0	0	1	0	0	0	0	0	0	0	1	FALSE
10121	ACTR1A	0	1	1	0	0	0	1	0	0	1	0	0	0	0	0	0	0	4	FALSE
10120	ACTR1B	0	0	0	0	0	0	0	0	0	0	0	0	0	0	0	0	0	0	FALSE
10097	ACTR2	0	0	0	0	0	0	0	0	0	0	0	0	0	0	0	0	0	0	FALSE
10096	ACTR3	0	0	0	0	0	0	0	0	0	0	0	0	0	0	0	0	0	0	FALSE
57180	ACTR3B	0	0	0	0	0	0	0	0	0	0	0	0	0	0	0	0	0	0	FALSE
79913	ACTR5	0	0	0	0	0	0	0	0	0	0	0	0	0	0	0	0	0	0	FALSE
64431	ACTR6	0	0	0	0	0	0	0	0	0	0	0	0	0	0	0	0	0	0	FALSE
93973	ACTR8	0	0	0	0	0	0	0	0	0	0	0	0	0	0	0	0	0	0	FALSE
139741	ACTRT1	0	0	0	0	0	0	0	0	0	0	0	0	0	0	0	0	0	0	FALSE
140625	ACTRT2	0	0	0	0	0	0	0	0	0	0	0	0	0	0	0	0	0	0	FALSE
84517	ACTRT3	0	0	0	0	0	0	0	0	0	0	0	0	0	0	0	0	0	0	FALSE
90	ACVR1	0	0	0	0	0	0	0	0	0	0	0	0	0	0	0	0	0	0	FALSE
91	ACVR1B	0	0	0	0	0	0	0	0	0	0	0	0	0	0	0	0	0	0	FALSE
130399	ACVR1C	0	0	0	0	0	0	0	0	0	0	0	0	0	0	0	0	0	0	FALSE
92	ACVR2A	0	0	0	0	0	0	0	0	0	0	0	0	0	0	0	0	0	0	FALSE
93	ACVR2B	0	0	0	0	0	0	0	0	0	0	0	0	0	0	0	0	0	0	FALSE
94	ACVRL1	0	0	0	0	0	0	0	0	0	0	0	0	0	0	0	0	0	0	FALSE
95	ACY1	0	0	0	0	0	0	0	0	0	0	0	0	0	0	0	0	0	0	FALSE
91703	ACY3	0	0	0	0	0	0	0	0	0	0	0	0	0	0	0	0	0	0	FALSE
97	ACYP1	0	0	0	0	0	0	0	0	0	0	0	0	0	0	0	0	0	0	FALSE
98	ACYP2	0	0	0	0	0	0	0	0	0	0	0	0	0	0	0	0	0	0	FALSE
100	ADA	0	0	0	0	0	0	0	0	0	0	0	0	0	0	0	0	0	0	FALSE
51816	ADA2	0	0	0	0	0	0	0	0	0	0	0	0	0	0	0	0	0	0	FALSE
132612	ADAD1	0	0	0	0	0	0	0	0	0	0	0	0	0	0	0	0	0	0	FALSE
161931	ADAD2	0	0	0	0	0	0	0	0	0	0	0	0	0	0	0	0	0	0	FALSE
161823	ADAL	0	0	0	0	0	0	0	0	0	0	0	0	0	0	0	0	0	0	FALSE
102	ADAM10	0	0	0	0	0	0	0	0	0	0	0	0	0	0	0	0	0	0	FALSE
4185	ADAM11	0	0	0	0	0	0	0	0	0	0	0	0	0	0	0	0	0	0	FALSE
8038	ADAM12	0	0	0	0	0	0	0	0	0	0	0	0	0	0	0	0	0	0	FALSE
8751	ADAM15	0	0	0	0	0	0	0	0	0	0	0	0	0	0	0	0	0	0	FALSE
6868	ADAM17	0	0	0	0	0	0	0	0	0	0	0	0	0	0	0	0	0	0	FALSE
8749	ADAM18	0	0	0	0	0	0	0	0	0	0	0	0	0	0	0	0	0	0	FALSE
8728	ADAM19	0	0	0	0	0	0	0	0	0	0	0	0	0	0	0	0	0	0	FALSE
2515	ADAM2	0	0	0	0	0	0	0	0	0	0	0	0	0	0	0	0	0	0	FALSE
8748	ADAM20	0	0	0	0	0	0	0	0	0	0	0	0	0	0	0	0	0	0	FALSE
8747	ADAM21	0	0	0	0	0	0	0	0	0	0	0	0	0	0	0	0	0	0	FALSE
53616	ADAM22	0	0	0	0	0	0	0	0	0	0	0	0	0	0	0	0	0	0	FALSE
8745	ADAM23	0	0	0	0	0	0	0	0	0	0	0	0	0	0	0	0	0	0	FALSE
10863	ADAM28	0	0	0	0	0	0	0	0	0	0	0	0	0	0	0	0	0	0	FALSE
11086	ADAM29	0	0	0	0	0	0	0	0	0	0	0	0	0	0	0	0	0	0	FALSE
11085	ADAM30	0	0	0	0	0	0	0	0	0	0	0	0	0	0	0	0	0	0	FALSE
203102	ADAM32	0	0	0	0	0	0	0	0	0	0	0	0	0	0	0	0	0	0	FALSE
80332	ADAM33	0	0	0	0	0	0	0	0	0	0	0	0	0	0	0	0	0	0	FALSE
8756	ADAM7	0	0	0	0	0	0	0	0	0	0	0	0	0	0	0	0	0	0	FALSE
101	ADAM8	0	0	0	0	0	0	0	0	0	0	0	0	0	0	0	0	0	0	FALSE
8754	ADAM9	0	0	0	0	0	0	0	0	0	0	0	0	0	0	0	0	0	0	FALSE
27299	ADAMDEC1	0	0	0	0	0	0	0	0	0	0	0	0	0	0	0	0	0	0	FALSE
9510	ADAMTS1	0	0	0	0	0	0	0	0	0	0	0	0	0	0	0	0	0	0	FALSE
81794	ADAMTS10	0	0	0	0	0	0	0	0	0	0	0	0	0	0	0	0	0	0	FALSE
81792	ADAMTS12	0	0	0	0	0	0	0	0	0	0	0	0	0	0	0	0	0	0	FALSE
11093	ADAMTS13	0	0	0	0	0	0	0	0	0	0	0	0	0	0	0	0	0	0	FALSE
140766	ADAMTS14	0	0	0	0	0	0	0	0	0	0	0	0	0	0	0	0	0	0	FALSE
170689	ADAMTS15	0	0	0	0	0	0	0	0	0	0	0	0	0	0	0	0	0	0	FALSE
170690	ADAMTS16	0	0	0	0	0	0	0	0	0	0	0	0	0	0	0	0	0	0	FALSE
170691	ADAMTS17	0	0	0	0	0	0	0	0	0	0	0	0	0	0	0	0	0	0	FALSE
170692	ADAMTS18	0	0	0	0	0	0	0	0	0	0	0	0	0	0	0	0	0	0	FALSE
171019	ADAMTS19	0	0	0	0	0	0	0	0	0	0	0	0	0	0	0	0	0	0	FALSE
9509	ADAMTS2	0	0	0	0	0	0	0	0	0	0	0	0	0	0	0	0	0	0	FALSE
80070	ADAMTS20	0	0	0	0	0	0	0	0	0	0	0	0	0	0	0	0	0	0	FALSE
9508	ADAMTS3	0	0	0	0	0	0	0	0	0	0	0	0	0	0	0	0	0	0	FALSE
9507	ADAMTS4	0	0	0	0	0	0	0	0	0	0	0	0	0	0	0	0	0	0	FALSE
11096	ADAMTS5	0	0	0	0	0	0	0	0	0	0	0	0	0	0	0	0	0	0	FALSE
11174	ADAMTS6	0	0	0	0	0	0	0	0	0	0	0	0	0	0	0	0	0	0	FALSE
11173	ADAMTS7	0	0	0	0	0	0	0	0	0	0	0	0	0	0	0	0	0	0	FALSE
11095	ADAMTS8	0	0	0	0	0	0	0	0	0	0	0	0	0	0	0	0	0	0	FALSE
56999	ADAMTS9	0	0	0	0	0	0	0	0	0	0	0	0	0	0	0	0	0	0	FALSE
92949	ADAMTSL1	0	0	0	0	0	0	0	0	0	0	0	0	0	0	0	0	0	0	FALSE
9719	ADAMTSL2	0	0	0	0	0	0	0	0	0	0	0	0	0	0	0	0	0	0	FALSE
57188	ADAMTSL3	0	0	0	0	0	0	0	0	0	0	0	0	0	0	0	0	0	0	FALSE
54507	ADAMTSL4	0	0	0	0	0	0	0	0	0	0	0	0	0	0	0	0	0	0	FALSE
339366	ADAMTSL5	0	0	0	0	0	0	0	0	0	0	0	0	0	0	0	0	0	0	FALSE
11033	ADAP1	0	0	0	0	0	0	0	0	0	0	0	0	0	0	0	0	0	0	FALSE
55803	ADAP2	0	0	0	0	0	0	0	0	0	0	0	0	0	0	0	0	0	0	FALSE
103	ADAR	0	0	0	0	0	0	0	0	0	0	0	0	0	0	0	0	0	0	FALSE
104	ADARB1	0	0	0	0	0	0	0	0	0	0	0	0	0	0	0	0	0	0	FALSE
105	ADARB2	0	0	0	0	0	0	0	0	0	0	0	0	0	0	0	0	0	0	FALSE
23536	ADAT1	0	0	0	0	0	0	0	0	0	0	0	0	0	0	0	0	0	0	FALSE
134637	ADAT2	0	0	0	0	0	0	0	0	0	0	0	0	0	0	0	0	0	0	FALSE
113179	ADAT3	0	0	0	0	0	0	0	0	0	0	0	0	0	0	0	0	0	0	FALSE
57143	ADCK1	0	0	0	0	0	0	0	0	0	0	0	0	0	0	0	0	0	0	FALSE
90956	ADCK2	0	0	0	0	0	0	0	0	0	0	0	0	0	0	0	0	0	0	FALSE
203054	ADCK5	0	0	0	0	0	0	0	0	0	0	0	0	0	0	0	0	0	0	FALSE
107	ADCY1	0	0	0	0	0	0	0	0	0	0	0	0	0	0	0	0	0	0	FALSE
55811	ADCY10	0	0	0	0	0	0	0	0	0	0	0	0	0	0	0	0	0	0	FALSE
108	ADCY2	0	0	0	0	0	0	0	0	0	0	0	0	0	0	0	0	0	0	FALSE
109	ADCY3	0	0	0	0	0	0	0	0	0	0	0	0	0	0	0	0	0	0	FALSE
196883	ADCY4	0	0	0	0	0	0	0	0	0	0	0	0	0	0	0	0	0	0	FALSE
111	ADCY5	0	0	0	0	0	0	0	0	0	0	0	0	0	0	0	0	0	0	FALSE
112	ADCY6	0	0	0	0	0	0	0	0	0	0	0	0	0	0	0	0	0	0	FALSE
113	ADCY7	0	0	0	0	0	0	0	0	0	0	0	0	0	0	0	0	0	0	FALSE
114	ADCY8	0	0	0	0	0	0	0	0	0	0	0	0	0	0	0	0	0	0	FALSE
115	ADCY9	0	0	0	0	0	0	0	0	0	0	0	0	0	0	0	0	0	0	FALSE
116	ADCYAP1	0	0	0	0	0	0	0	0	0	0	0	0	0	0	0	0	0	0	FALSE
117	ADCYAP1R1	0	0	0	0	0	0	0	0	0	0	0	0	0	0	0	0	0	0	FALSE
118	ADD1	0	0	0	0	0	0	0	0	0	0	0	0	0	0	0	0	0	0	FALSE
119	ADD2	0	0	0	0	0	0	0	0	0	0	0	0	0	0	0	0	0	0	FALSE
120	ADD3	0	0	0	0	0	0	0	0	0	0	0	0	0	0	0	0	0	0	FALSE
84435	ADGRA1	0	0	0	0	0	0	0	0	0	0	0	0	0	0	0	0	0	0	FALSE
25960	ADGRA2	0	0	0	0	0	0	0	0	0	0	0	0	0	0	0	0	0	0	FALSE
166647	ADGRA3	0	0	0	0	0	0	0	0	0	0	0	0	0	0	0	0	0	0	FALSE
575	ADGRB1	0	0	0	0	0	0	0	0	0	0	0	0	0	0	0	0	0	0	FALSE
576	ADGRB2	0	0	0	0	0	0	0	0	0	0	0	0	0	0	0	0	0	0	FALSE
577	ADGRB3	0	0	0	0	0	0	0	0	0	0	0	0	0	0	0	0	0	0	FALSE
283383	ADGRD1	0	0	0	0	0	0	0	0	0	0	0	0	0	0	0	0	0	0	FALSE
2015	ADGRE1	0	0	0	0	0	0	0	0	0	0	0	0	0	0	0	0	0	0	FALSE
30817	ADGRE2	0	0	0	0	0	0	0	0	0	0	0	0	0	0	0	0	0	0	FALSE
84658	ADGRE3	0	0	0	0	0	0	0	0	0	0	0	0	0	0	0	0	0	0	FALSE
976	ADGRE5	0	0	0	0	0	0	0	0	0	0	0	0	0	0	0	0	0	0	FALSE
266977	ADGRF1	0	0	0	0	0	0	0	0	0	0	0	0	0	0	0	0	0	0	FALSE
165082	ADGRF3	0	0	0	0	0	0	0	0	0	0	0	0	0	0	0	0	0	0	FALSE
221393	ADGRF4	0	0	0	0	0	0	0	0	0	0	0	0	0	0	0	0	0	0	FALSE
221395	ADGRF5	0	0	0	0	0	0	0	0	0	0	0	0	0	0	0	0	0	0	FALSE
9289	ADGRG1	0	0	0	0	0	0	0	0	0	0	0	0	0	0	0	0	0	0	FALSE
10149	ADGRG2	0	0	0	0	0	0	0	0	0	0	0	0	0	0	0	0	0	0	FALSE
222487	ADGRG3	0	0	0	0	0	0	0	0	0	0	0	0	0	0	0	0	0	0	FALSE
139378	ADGRG4	0	1	1	0	0	0	0	0	0	1	0	0	0	0	0	0	0	3	FALSE
221188	ADGRG5	0	0	0	0	0	0	0	0	0	0	0	0	0	0	0	0	0	0	FALSE
57211	ADGRG6	0	0	0	0	0	0	0	0	0	0	0	0	0	0	0	0	0	0	FALSE
84873	ADGRG7	0	0	0	0	0	0	0	0	0	0	0	0	0	0	0	0	0	0	FALSE
22859	ADGRL1	0	0	0	0	0	0	0	0	0	0	0	0	0	0	0	0	0	0	FALSE
23266	ADGRL2	0	0	0	0	0	0	0	0	0	0	0	0	0	0	0	0	0	0	FALSE
23284	ADGRL3	0	0	0	0	0	0	0	0	0	0	0	0	0	0	0	0	0	0	FALSE
64123	ADGRL4	0	0	0	0	0	0	0	0	0	0	0	0	0	0	0	0	0	0	FALSE
84059	ADGRV1	0	0	0	0	0	0	0	0	0	0	0	0	0	0	0	0	0	0	FALSE
124	ADH1A	0	0	0	0	0	0	0	0	0	0	0	0	0	0	0	0	0	0	FALSE
125	ADH1B	0	0	0	0	0	0	0	0	0	0	0	0	0	0	0	0	0	0	FALSE
127	ADH4	0	0	0	0	0	0	0	0	0	0	0	0	0	0	0	0	0	0	FALSE
128	ADH5	0	0	0	0	0	0	0	0	0	0	0	0	0	0	0	0	0	0	FALSE
130	ADH6	0	0	0	0	0	0	0	0	0	0	0	0	0	0	0	0	0	0	FALSE
137872	ADHFE1	0	0	0	0	0	0	0	0	0	0	0	0	0	0	0	0	0	0	FALSE
55256	ADI1	0	0	0	0	0	0	0	0	0	0	0	0	0	0	0	0	0	0	FALSE
149685	ADIG	0	0	0	0	0	0	0	0	0	0	0	0	0	0	0	0	0	0	FALSE
9370	ADIPOQ	0	0	0	0	0	0	0	0	0	0	0	0	0	0	0	0	0	0	FALSE
51094	ADIPOR1	0	0	0	0	0	0	0	0	0	0	0	0	0	0	0	0	0	0	FALSE
79602	ADIPOR2	0	0	0	0	0	0	0	0	0	0	0	0	0	0	0	0	0	0	FALSE
10974	ADIRF	0	0	0	0	0	0	0	0	0	0	0	0	0	0	0	0	0	0	FALSE
132	ADK	0	0	0	0	0	0	0	0	0	0	0	0	0	0	0	0	0	0	FALSE
133	ADM	0	0	0	0	0	0	0	0	0	0	0	0	0	0	0	0	0	0	FALSE
79924	ADM2	0	0	0	0	0	0	0	0	0	0	0	0	0	0	0	0	0	0	FALSE
23394	ADNP	0	0	0	0	0	0	0	0	0	0	0	0	0	0	0	0	0	0	FALSE
22850	ADNP2	0	0	0	0	0	0	0	0	0	0	0	0	0	0	0	0	0	0	FALSE
134	ADORA1	0	0	0	0	0	0	0	0	0	0	0	0	0	0	0	0	0	0	FALSE
135	ADORA2A	0	0	0	0	0	0	0	0	0	0	0	0	0	0	0	0	0	0	FALSE
136	ADORA2B	0	0	0	0	0	0	0	0	0	0	0	0	0	0	0	0	0	0	FALSE
83440	ADPGK	0	0	0	0	0	0	0	0	0	0	0	0	0	0	0	0	0	0	FALSE
141	ADPRH	0	0	0	0	0	0	0	0	0	0	0	0	0	0	0	0	0	0	FALSE
113622	ADPRHL1	0	0	0	0	0	0	0	0	0	0	0	0	0	0	0	0	0	0	FALSE
54936	ADPRHL2	0	0	0	0	0	0	0	0	0	0	0	0	0	0	0	0	0	0	FALSE
56985	ADPRM	0	0	0	0	0	0	0	0	0	0	0	0	0	0	0	0	0	0	FALSE
148	ADRA1A	0	0	0	0	0	0	0	0	0	0	0	0	0	0	0	0	0	0	FALSE
147	ADRA1B	0	0	0	0	0	0	0	0	0	0	0	0	0	0	0	0	0	0	FALSE
146	ADRA1D	0	0	0	0	0	0	0	0	0	0	0	0	0	0	0	0	0	0	FALSE
150	ADRA2A	0	0	0	0	0	0	0	0	0	0	0	0	0	0	0	0	0	0	FALSE
151	ADRA2B	0	0	0	0	0	0	0	0	0	0	0	0	0	0	0	0	0	0	FALSE
152	ADRA2C	0	0	0	0	0	0	0	0	0	0	0	0	0	0	0	0	0	0	FALSE
153	ADRB1	0	0	0	0	0	0	0	0	0	0	0	0	0	0	0	0	0	0	FALSE
154	ADRB2	0	0	0	0	0	0	0	0	0	0	0	0	0	0	0	0	0	0	FALSE
155	ADRB3	0	0	0	0	0	0	0	0	0	0	0	0	0	0	0	0	0	0	FALSE
11047	ADRM1	0	0	0	0	0	0	0	0	0	0	0	0	0	0	0	0	0	0	FALSE
158	ADSL	0	0	0	1	0	0	0	0	0	0	0	0	0	0	0	0	0	1	FALSE
159	ADSS	0	0	0	0	0	0	0	0	0	0	0	0	0	0	0	0	0	0	FALSE
122622	ADSSL1	0	0	0	0	0	0	0	0	0	0	0	0	0	0	0	0	0	0	FALSE
84830	ADTRP	0	0	0	0	0	0	0	0	0	0	0	0	0	0	0	0	0	0	FALSE
165	AEBP1	0	0	0	0	0	0	0	0	0	0	0	0	0	0	0	0	0	0	FALSE
121536	AEBP2	0	0	0	0	0	0	0	0	0	0	0	0	0	0	0	0	0	0	FALSE
64782	AEN	0	0	0	0	0	0	0	0	0	0	0	0	0	0	0	0	0	0	FALSE
166	TLE5	0	0	0	0	0	0	0	0	0	0	0	0	0	0	0	0	0	0	FALSE
60312	AFAP1	0	0	0	0	0	0	0	0	0	0	0	0	0	0	0	0	0	0	FALSE
4301	AFDN	0	0	0	0	0	0	0	0	0	0	0	0	0	0	0	0	0	0	FALSE
4299	AFF1	0	0	0	0	0	0	0	0	0	0	0	0	0	0	0	0	0	0	FALSE
2334	AFF2	0	0	0	0	0	0	0	0	0	0	0	0	0	0	0	0	0	0	FALSE
3899	AFF3	0	0	0	0	0	0	0	0	0	0	0	0	0	0	0	0	0	0	FALSE
27125	AFF4	0	0	0	0	0	0	0	0	0	0	0	0	0	0	0	0	0	0	FALSE
246269	AFG1L	0	0	0	0	0	0	0	0	0	0	0	0	0	0	0	0	0	0	FALSE
10939	AFG3L2	1	1	1	1	1	1	1	1	1	1	1	1	1	1	1	1	1	17	TRUE
173	AFM	0	0	0	0	0	0	0	0	0	0	0	0	0	0	0	0	0	0	FALSE
125061	AFMID	0	0	0	0	0	0	0	0	0	0	0	0	0	0	0	0	0	0	FALSE
174	AFP	0	0	0	0	0	0	0	0	0	0	0	0	0	0	0	0	0	0	FALSE
54812	AFTPH	0	0	0	0	0	0	0	0	0	0	0	0	0	0	0	0	0	0	FALSE
175	AGA	0	0	0	0	0	0	0	0	0	0	0	0	0	0	0	0	0	0	FALSE
116987	AGAP1	0	0	0	0	0	0	0	0	0	0	0	0	0	0	0	0	0	0	FALSE
116986	AGAP2	0	0	0	0	0	0	0	0	0	0	0	0	0	0	0	0	0	0	FALSE
116988	AGAP3	0	0	0	0	0	0	0	0	0	0	0	0	0	0	0	0	0	0	FALSE
119016	AGAP4	0	0	0	0	0	0	0	0	0	0	0	0	0	0	0	0	0	0	FALSE
729092	AGAP5	0	0	0	0	0	0	0	0	0	0	0	0	0	0	0	0	0	0	FALSE
414189	AGAP6	0	0	0	0	0	0	0	0	0	0	0	0	0	0	0	0	0	0	FALSE
642517	AGAP9	0	0	0	0	0	0	0	0	0	0	0	0	0	0	0	0	0	0	FALSE
79841	AGBL2	0	0	0	0	0	0	0	0	0	0	0	0	0	0	0	0	0	0	FALSE
340351	AGBL3	0	0	0	0	0	0	0	0	0	0	0	0	0	0	0	0	0	0	FALSE
60509	AGBL5	0	0	0	0	0	0	0	0	0	0	0	0	0	0	0	0	0	0	FALSE
177	AGER	0	0	0	0	0	0	0	0	0	0	0	0	0	0	0	0	0	0	FALSE
3267	AGFG1	0	0	0	0	0	0	0	0	0	0	0	0	0	0	0	0	0	0	FALSE
3268	AGFG2	0	0	0	0	0	0	0	0	0	0	0	0	0	0	0	0	0	0	FALSE
55109	AGGF1	0	0	0	0	0	0	0	0	0	0	0	0	0	0	0	0	0	0	FALSE
55750	AGK	0	0	0	0	0	0	0	0	0	0	0	0	0	0	0	0	0	0	FALSE
178	AGL	0	0	0	0	0	0	0	0	0	0	0	0	0	0	0	0	0	0	FALSE
79814	AGMAT	0	0	0	0	0	0	0	0	0	0	0	0	0	0	0	0	0	0	FALSE
392636	AGMO	0	0	0	0	0	0	0	0	0	0	0	0	0	0	0	0	0	0	FALSE
26523	AGO1	0	0	0	0	0	0	0	0	0	0	0	0	0	0	0	0	0	0	FALSE
27161	AGO2	0	0	0	0	0	0	0	0	0	0	0	0	0	0	0	0	0	0	FALSE
192669	AGO3	0	0	0	0	0	0	0	0	0	0	0	0	0	0	0	0	0	0	FALSE
192670	AGO4	0	0	0	0	0	0	0	0	0	0	0	0	0	0	0	0	0	0	FALSE
10554	AGPAT1	0	0	0	0	0	0	0	0	0	0	0	0	0	0	0	0	0	0	FALSE
10555	AGPAT2	0	0	0	0	0	0	0	0	0	0	0	0	0	0	0	0	0	0	FALSE
56894	AGPAT3	0	0	0	0	0	0	0	0	0	0	0	0	0	0	0	0	0	0	FALSE
56895	AGPAT4	0	0	0	0	0	0	0	0	0	0	0	0	0	0	0	0	0	0	FALSE
55326	AGPAT5	0	0	0	0	0	0	0	0	0	0	0	0	0	0	0	0	0	0	FALSE
8540	AGPS	0	0	0	0	0	0	0	0	0	0	0	0	0	0	0	0	0	0	FALSE
10551	AGR2	0	0	0	0	0	0	0	0	0	0	0	0	0	0	0	0	0	0	FALSE
155465	AGR3	0	0	0	0	0	0	0	0	0	0	0	0	0	0	0	0	0	0	FALSE
375790	AGRN	0	0	0	0	0	0	0	0	0	0	0	0	0	0	0	0	0	0	FALSE
181	AGRP	0	0	0	0	0	0	0	0	0	0	0	0	0	0	0	0	0	0	FALSE
183	AGT	0	0	0	0	0	0	0	0	0	0	0	0	0	0	0	0	0	0	FALSE
23287	AGTPBP1	0	0	0	0	0	0	0	0	0	0	0	0	0	0	0	0	0	0	FALSE
185	AGTR1	0	0	0	0	0	0	0	0	0	0	0	0	0	0	0	0	0	0	FALSE
186	AGTR2	0	0	0	0	0	0	0	0	0	0	0	0	0	0	0	0	0	0	FALSE
57085	AGTRAP	0	0	0	0	0	0	0	0	0	0	0	0	0	0	0	0	0	0	FALSE
189	AGXT	0	0	0	0	0	0	0	0	0	0	0	0	0	0	0	0	0	0	FALSE
64902	AGXT2	0	0	0	0	0	0	0	0	0	0	0	0	0	0	0	0	0	0	FALSE
25909	AHCTF1	1	1	1	1	1	1	1	1	0	1	1	1	1	0	1	1	1	15	TRUE
191	AHCY	0	0	0	0	0	0	0	0	0	0	0	0	0	0	0	0	0	0	FALSE
10768	AHCYL1	0	0	0	0	0	0	0	0	0	0	0	0	0	0	0	0	0	0	FALSE
23382	AHCYL2	0	0	0	0	0	0	0	0	0	0	0	0	0	0	0	0	0	0	FALSE
54806	AHI1	0	0	0	0	0	0	0	0	0	0	0	0	0	0	0	0	0	0	FALSE
79026	AHNAK	0	0	0	0	0	0	0	0	0	0	0	0	0	0	0	0	0	0	FALSE
196	AHR	0	0	0	0	0	0	0	0	0	0	0	0	0	0	0	0	0	0	FALSE
57491	AHRR	0	0	0	0	0	0	0	0	0	0	0	0	0	0	0	0	0	0	FALSE
10598	AHSA1	0	0	0	0	0	0	0	0	0	0	0	0	0	0	0	0	0	0	FALSE
197	AHSG	0	0	0	0	0	0	0	0	0	0	0	0	0	0	0	0	0	0	FALSE
51327	AHSP	0	0	0	0	0	0	0	0	0	0	0	0	0	0	0	0	0	0	FALSE
57379	AICDA	0	0	0	0	0	0	0	0	0	0	0	0	0	0	0	0	0	0	FALSE
64853	AIDA	0	0	0	0	0	0	0	0	0	0	0	0	0	0	0	0	0	0	FALSE
199	AIF1	0	0	0	0	0	0	0	0	0	0	0	0	0	0	0	0	0	0	FALSE
83543	AIF1L	0	0	0	0	0	0	0	0	0	0	0	0	0	0	0	0	0	0	FALSE
9131	AIFM1	0	0	0	0	0	0	0	0	0	0	0	0	0	0	0	0	0	0	FALSE
84883	AIFM2	0	0	0	0	0	0	0	0	0	0	0	0	0	0	0	0	0	0	FALSE
150209	AIFM3	0	0	0	0	0	0	0	0	0	0	0	0	0	0	0	0	0	0	FALSE
51390	AIG1	0	0	0	0	0	0	0	0	0	0	0	0	0	0	0	0	0	0	FALSE
9447	AIM2	0	0	0	0	0	0	0	0	0	0	0	0	0	0	0	0	0	0	FALSE
9255	AIMP1	0	0	0	0	0	0	0	0	0	0	0	0	0	0	0	0	0	0	FALSE
7965	AIMP2	0	0	0	0	0	0	0	0	0	0	0	0	0	0	0	0	0	0	FALSE
9049	AIP	0	0	0	0	0	0	0	0	0	0	0	0	0	0	0	0	0	0	FALSE
23746	AIPL1	0	0	0	0	0	0	0	0	0	0	0	0	0	0	0	0	0	0	FALSE
326	AIRE	0	0	0	0	0	0	0	0	0	0	0	0	0	0	0	0	0	0	FALSE
55966	AJAP1	0	0	0	0	0	0	0	0	0	0	0	0	0	0	0	0	0	0	FALSE
84962	AJUBA	0	0	0	0	0	0	0	0	0	0	0	0	0	0	0	0	0	0	FALSE
203	AK1	0	0	0	0	0	0	0	0	0	0	0	0	0	0	0	0	0	0	FALSE
204	AK2	0	0	0	0	0	0	0	0	0	0	0	0	0	0	0	0	0	0	FALSE
50808	AK3	0	0	0	0	0	0	0	0	0	0	0	0	0	0	0	0	0	0	FALSE
205	AK4	0	0	0	0	0	0	0	0	0	0	0	0	0	0	0	0	0	0	FALSE
26289	AK5	0	0	0	0	0	0	0	0	0	0	0	0	0	0	0	0	0	0	FALSE
122481	AK7	0	0	0	0	0	0	0	0	0	0	0	0	0	0	0	0	0	0	FALSE
158067	AK8	0	0	0	0	0	0	0	0	0	0	0	0	0	0	0	0	0	0	FALSE
221264	AK9	0	0	0	0	0	0	0	0	0	0	0	0	0	0	0	0	0	0	FALSE
8165	AKAP1	0	0	0	0	0	0	0	0	0	0	0	0	0	0	0	0	0	0	FALSE
11216	AKAP10	0	0	0	0	0	0	0	0	0	0	0	0	0	0	0	0	0	0	FALSE
11215	AKAP11	0	0	0	0	0	0	0	0	0	0	0	0	0	0	0	0	0	0	FALSE
9590	AKAP12	0	0	0	0	0	0	0	0	0	0	0	0	0	0	0	0	0	0	FALSE
11214	AKAP13	0	0	0	0	0	0	0	0	0	0	0	0	0	0	0	0	0	0	FALSE
158798	AKAP14	0	0	0	0	0	0	0	0	0	0	0	0	0	0	0	0	0	0	FALSE
8227	AKAP17A	0	0	0	0	0	0	0	0	0	0	0	0	0	0	0	0	0	0	FALSE
11217	AKAP2	0	0	0	0	0	0	0	0	0	0	0	0	0	0	0	0	0	0	FALSE
10566	AKAP3	0	0	0	0	0	0	0	0	0	0	0	0	0	0	0	0	0	0	FALSE
9495	AKAP5	0	0	0	0	0	0	0	0	0	0	0	0	0	0	0	0	0	0	FALSE
9472	AKAP6	0	0	0	0	0	0	0	0	0	0	0	0	0	0	0	0	0	0	FALSE
9465	AKAP7	0	0	0	0	0	0	0	0	0	0	0	0	0	0	0	0	0	0	FALSE
10270	AKAP8	0	0	0	0	0	0	0	0	0	0	0	0	0	0	0	0	0	0	FALSE
26993	AKAP8L	0	0	0	0	0	0	0	0	0	0	0	0	0	0	0	0	0	0	FALSE
10142	AKAP9	0	0	0	0	0	0	0	0	0	0	0	0	0	0	0	0	0	0	FALSE
56672	AKIP1	0	0	0	0	0	0	0	0	0	0	0	0	0	0	0	0	0	0	FALSE
79647	AKIRIN1	0	0	0	0	0	0	0	0	0	0	0	0	0	0	0	0	0	0	FALSE
80709	AKNA	0	0	0	0	0	0	0	0	0	0	0	0	0	0	0	0	0	0	FALSE
10327	AKR1A1	0	0	0	0	0	0	0	0	0	0	0	0	0	0	0	0	0	0	FALSE
231	AKR1B1	0	0	0	0	0	0	0	0	0	0	0	0	0	0	0	0	0	0	FALSE
57016	AKR1B10	0	0	0	0	0	0	0	0	0	0	0	0	0	0	0	0	0	0	FALSE
441282	AKR1B15	0	0	0	0	0	0	0	0	0	0	0	0	0	0	0	0	0	0	FALSE
1645	AKR1C1	0	0	0	0	0	0	0	0	0	0	0	0	0	0	0	0	0	0	FALSE
1646	AKR1C2	0	0	0	0	0	0	0	0	0	0	0	0	0	0	0	0	0	0	FALSE
8644	AKR1C3	0	0	0	0	0	0	0	0	0	0	0	0	0	0	0	0	0	0	FALSE
1109	AKR1C4	0	0	0	0	0	0	0	0	0	0	0	0	0	0	0	0	0	0	FALSE
6718	AKR1D1	0	0	0	0	0	0	0	0	0	0	0	0	0	0	0	0	0	0	FALSE
83592	AKR1E2	0	0	0	0	0	0	0	0	0	0	0	0	0	0	0	0	0	0	FALSE
8574	AKR7A2	0	0	0	0	0	0	0	0	0	0	0	0	0	0	0	0	0	0	FALSE
22977	AKR7A3	0	0	0	0	0	0	0	0	0	0	0	0	0	0	0	0	0	0	FALSE
246181	AKR7L	0	0	0	0	0	0	0	0	0	0	0	0	0	0	0	0	0	0	FALSE
207	AKT1	0	0	0	0	0	0	0	0	0	0	0	0	0	0	0	0	0	0	FALSE
84335	AKT1S1	0	0	0	0	0	0	0	0	0	0	0	0	0	0	0	0	0	0	FALSE
208	AKT2	0	0	0	0	0	0	0	0	0	0	0	0	0	0	0	0	0	0	FALSE
10000	AKT3	0	0	0	0	0	0	0	0	0	0	0	0	0	0	0	0	0	0	FALSE
64400	AKTIP	0	0	0	0	0	0	0	0	0	0	0	0	0	0	0	0	0	0	FALSE
210	ALAD	0	0	0	0	0	0	0	0	0	0	0	0	0	0	0	0	0	0	FALSE
211	ALAS1	0	0	0	0	0	0	0	0	0	0	0	0	0	0	0	0	0	0	FALSE
212	ALAS2	0	0	0	0	0	0	0	0	0	0	0	0	0	0	0	0	0	0	FALSE
213	ALB	0	0	0	0	0	0	0	0	0	0	0	0	0	0	0	0	0	0	FALSE
214	ALCAM	0	0	0	0	0	0	0	0	0	0	0	0	0	0	0	0	0	0	FALSE
126133	ALDH16A1	0	0	0	0	0	0	0	0	0	0	0	0	0	0	0	0	0	0	FALSE
5832	ALDH18A1	0	0	0	0	0	0	0	0	0	0	0	0	0	0	0	0	0	0	FALSE
216	ALDH1A1	0	0	0	0	0	0	0	0	0	0	0	0	0	0	0	0	0	0	FALSE
8854	ALDH1A2	0	0	0	0	0	0	0	0	0	0	0	0	0	0	0	0	0	0	FALSE
220	ALDH1A3	0	0	0	0	0	0	0	0	0	0	0	0	0	0	0	0	0	0	FALSE
219	ALDH1B1	0	0	0	0	0	0	0	0	0	0	0	0	0	0	0	0	0	0	FALSE
10840	ALDH1L1	0	0	0	0	0	0	0	0	0	0	0	0	0	0	0	0	0	0	FALSE
160428	ALDH1L2	0	0	0	0	0	0	0	0	0	0	0	0	0	0	0	0	0	0	FALSE
217	ALDH2	0	0	0	0	0	0	0	0	0	0	0	0	0	0	0	0	0	0	FALSE
218	ALDH3A1	0	0	0	0	0	0	0	0	0	0	0	0	0	0	0	0	0	0	FALSE
222	ALDH3B2	0	0	0	0	0	0	0	0	0	0	0	0	0	0	0	0	0	0	FALSE
8659	ALDH4A1	0	0	0	0	0	0	0	0	0	0	0	0	0	0	0	0	0	0	FALSE
7915	ALDH5A1	0	0	0	0	0	0	0	0	0	0	0	0	0	0	0	0	0	0	FALSE
501	ALDH7A1	0	0	0	0	0	0	0	0	0	0	0	0	0	0	0	0	0	0	FALSE
64577	ALDH8A1	0	0	0	0	0	0	0	0	0	0	0	0	0	0	0	0	0	0	FALSE
223	ALDH9A1	0	0	0	0	0	0	0	0	0	0	0	0	0	0	0	0	0	0	FALSE
226	ALDOA	0	0	1	0	0	0	0	0	1	1	0	1	0	0	0	0	0	4	FALSE
229	ALDOB	0	0	0	0	0	0	0	0	0	0	0	0	0	0	0	0	0	0	FALSE
230	ALDOC	0	0	0	0	0	0	0	0	0	0	0	0	0	0	0	0	0	0	FALSE
56052	ALG1	0	0	0	0	0	0	0	0	0	0	0	0	0	0	0	0	0	0	FALSE
84920	ALG10	0	0	0	0	0	0	0	0	0	0	0	0	0	0	0	0	0	0	FALSE
144245	ALG10B	0	0	0	0	0	0	0	0	0	0	0	0	0	0	0	0	0	0	FALSE
440138	ALG11	0	0	0	0	0	0	0	0	0	0	0	0	0	0	0	0	0	0	FALSE
79087	ALG12	0	0	0	0	0	0	0	0	0	0	0	0	0	0	0	0	0	0	FALSE
79868	ALG13	0	0	0	0	0	0	0	0	0	0	0	0	0	0	0	0	0	0	FALSE
200810	ALG1L	0	0	0	0	0	0	0	0	0	0	0	0	0	0	0	0	0	0	FALSE
85365	ALG2	0	0	0	0	0	0	0	0	0	0	0	0	0	0	0	0	0	0	FALSE
10195	ALG3	0	0	0	0	0	0	0	0	0	0	0	0	0	0	0	0	0	0	FALSE
29880	ALG5	0	0	0	0	0	0	0	0	0	0	0	0	0	0	0	0	0	0	FALSE
29929	ALG6	0	0	0	0	0	0	0	0	0	0	0	0	0	0	0	0	0	0	FALSE
79053	ALG8	0	0	0	0	0	0	0	0	0	0	0	0	0	0	0	0	0	0	FALSE
79796	ALG9	0	0	0	0	0	0	0	0	0	0	0	0	0	0	0	0	0	0	FALSE
238	ALK	0	0	0	0	0	0	0	0	0	0	0	0	0	0	0	0	0	0	FALSE
389658	ALKAL1	0	0	0	0	0	0	0	0	0	0	0	0	0	0	0	0	0	0	FALSE
8846	ALKBH1	0	0	0	0	0	0	0	0	0	0	0	0	0	0	0	0	0	0	FALSE
121642	ALKBH2	0	0	0	0	0	0	0	0	0	0	0	0	0	0	0	0	0	0	FALSE
221120	ALKBH3	0	0	0	0	0	0	0	0	0	0	0	0	0	0	0	0	0	0	FALSE
54784	ALKBH4	0	0	0	0	0	0	0	0	0	0	0	0	0	0	0	0	0	0	FALSE
54890	ALKBH5	0	0	0	0	0	0	0	0	0	0	0	0	0	0	0	0	0	0	FALSE
84266	ALKBH7	0	0	0	0	0	0	0	0	0	0	0	0	0	0	0	0	0	0	FALSE
91801	ALKBH8	0	0	0	0	0	0	0	0	0	0	0	0	0	0	0	0	0	0	FALSE
55821	ALLC	0	0	0	0	0	0	0	0	0	0	0	0	0	0	0	0	0	0	FALSE
7840	ALMS1	0	0	0	0	0	0	0	0	0	0	0	0	0	0	0	0	0	0	FALSE
239	ALOX12	0	0	0	0	0	0	0	0	0	0	0	0	0	0	0	0	0	0	FALSE
242	ALOX12B	0	0	0	0	0	0	0	0	0	0	0	0	0	0	0	0	0	0	FALSE
246	ALOX15	0	0	0	0	0	0	0	0	0	0	0	0	0	0	0	0	0	0	FALSE
247	ALOX15B	0	0	0	0	0	0	0	0	0	0	0	0	0	0	0	0	0	0	FALSE
240	ALOX5	0	0	0	0	0	0	0	0	0	0	0	0	0	0	0	0	0	0	FALSE
241	ALOX5AP	0	0	0	0	0	0	0	0	0	0	0	0	0	0	0	0	0	0	FALSE
59344	ALOXE3	0	0	0	0	0	0	0	0	0	0	0	0	0	0	0	0	0	0	FALSE
251	ALPG	0	0	0	0	0	0	0	0	0	0	0	0	0	0	0	0	0	0	FALSE
248	ALPI	0	0	0	0	0	0	0	0	0	0	0	0	0	0	0	0	0	0	FALSE
80216	ALPK1	0	0	0	0	0	0	0	0	0	0	0	0	0	0	0	0	0	0	FALSE
115701	ALPK2	0	0	0	0	0	0	0	0	0	0	0	0	0	0	0	0	0	0	FALSE
57538	ALPK3	0	0	0	0	0	0	0	0	0	0	0	0	0	0	0	0	0	0	FALSE
249	ALPL	0	0	0	0	0	0	0	0	0	0	0	0	0	0	0	0	0	0	FALSE
250	ALPP	0	0	0	0	0	0	0	0	0	0	0	0	0	0	0	0	0	0	FALSE
57679	ALS2	0	0	0	0	0	0	0	0	0	0	0	0	0	0	0	0	0	0	FALSE
259173	ALS2CL	0	0	0	0	0	0	0	0	0	0	0	0	0	0	0	0	0	0	FALSE
130540	FLACC1	0	0	0	0	0	0	0	0	0	0	0	0	0	0	0	0	0	0	FALSE
8092	ALX1	0	0	0	0	0	0	0	0	0	0	0	0	0	0	0	0	0	0	FALSE
257	ALX3	0	0	0	0	0	0	0	0	0	0	0	0	0	0	0	0	0	0	FALSE
60529	ALX4	0	0	0	0	0	0	0	0	0	0	0	0	0	0	0	0	0	0	FALSE
10189	ALYREF	1	1	1	1	1	1	1	1	1	1	1	1	1	1	1	1	1	17	TRUE
23600	AMACR	0	0	0	0	0	0	0	0	0	0	0	0	0	0	0	0	0	0	FALSE
258	AMBN	0	0	0	0	0	0	0	0	0	0	0	0	0	0	0	0	0	0	FALSE
259	AMBP	0	0	0	0	0	0	0	0	0	0	0	0	0	0	0	0	0	0	FALSE
55626	AMBRA1	0	0	0	0	0	0	0	0	0	0	0	0	0	0	0	0	0	0	FALSE
262	AMD1	0	0	0	0	0	0	0	0	0	0	0	0	0	0	0	0	0	0	FALSE
144193	AMDHD1	0	0	0	0	0	0	0	0	0	0	0	0	0	0	0	0	0	0	FALSE
51005	AMDHD2	0	0	0	0	0	0	0	0	0	0	0	0	0	0	0	0	0	0	FALSE
265	AMELX	0	0	0	0	0	0	0	0	0	0	0	0	0	0	0	0	0	0	FALSE
139285	AMER1	0	0	0	0	0	0	0	0	0	1	0	0	0	0	0	0	0	1	FALSE
205147	AMER3	0	0	0	0	0	0	0	0	0	0	0	0	0	0	0	0	0	0	FALSE
267	AMFR	0	0	0	0	0	0	0	0	0	0	0	0	0	0	0	0	0	0	FALSE
268	AMH	0	0	0	0	0	0	0	0	0	0	0	0	0	0	0	0	0	0	FALSE
269	AMHR2	0	0	0	0	0	0	0	0	0	0	0	0	0	0	0	0	0	0	FALSE
57463	AMIGO1	0	0	0	0	0	0	0	0	0	0	0	0	0	0	0	0	0	0	FALSE
347902	AMIGO2	0	0	0	0	0	0	0	0	0	0	0	0	0	0	0	0	0	0	FALSE
386724	AMIGO3	0	0	0	0	0	0	0	0	0	0	0	0	0	0	0	0	0	0	FALSE
9949	AMMECR1	0	0	0	0	0	0	0	0	0	0	0	0	0	0	0	0	0	0	FALSE
81693	AMN	0	0	0	0	0	0	0	0	0	0	0	0	0	0	0	0	0	0	FALSE
196394	AMN1	0	0	0	0	0	0	0	0	0	0	0	0	0	0	0	0	0	0	FALSE
154796	AMOT	0	0	0	0	0	0	0	0	0	0	0	0	0	0	0	0	0	0	FALSE
154810	AMOTL1	0	0	0	0	0	0	0	0	0	0	0	0	0	0	0	0	0	0	FALSE
51421	AMOTL2	0	0	0	0	0	0	0	0	0	0	0	0	0	0	0	0	0	0	FALSE
270	AMPD1	0	0	0	0	0	0	0	0	0	0	0	0	0	0	0	0	0	0	FALSE
271	AMPD2	0	0	0	0	0	0	0	0	0	0	0	0	0	0	0	0	0	0	FALSE
272	AMPD3	0	0	0	0	0	0	0	0	0	0	0	0	0	0	0	0	0	0	FALSE
273	AMPH	0	0	0	0	0	0	0	0	0	0	0	0	0	0	0	0	0	0	FALSE
275	AMT	0	0	0	0	0	0	0	0	0	0	0	0	0	0	0	0	0	0	FALSE
401138	AMTN	0	0	0	0	0	0	0	0	0	0	0	0	0	0	0	0	0	0	FALSE
279	AMY2A	0	0	0	0	0	0	0	0	0	0	0	0	0	0	0	0	0	0	FALSE
280	AMY2B	0	0	0	0	0	0	0	0	0	0	0	0	0	0	0	0	0	0	FALSE
155185	AMZ1	0	0	0	0	0	0	0	0	0	0	0	0	0	0	0	0	0	0	FALSE
51321	AMZ2	0	0	0	0	0	0	0	0	0	0	0	0	0	0	0	0	0	0	FALSE
64682	ANAPC1	1	1	1	1	1	1	1	0	1	1	0	0	1	1	1	1	1	14	TRUE
10393	ANAPC10	0	0	0	0	0	0	0	0	0	0	0	0	0	0	0	0	0	0	FALSE
51529	ANAPC11	0	0	0	0	0	0	0	0	0	0	0	0	0	0	0	0	0	0	FALSE
25906	ANAPC15	0	0	0	0	0	0	0	0	0	0	0	0	0	0	0	0	0	0	FALSE
29882	ANAPC2	0	0	0	0	0	0	0	0	0	0	0	0	0	0	0	0	0	0	FALSE
29945	ANAPC4	1	1	1	1	1	1	1	1	1	1	0	1	0	1	1	1	1	15	TRUE
51433	ANAPC5	0	1	1	1	1	1	1	1	1	1	0	1	1	1	1	1	1	15	TRUE
51434	ANAPC7	0	0	0	0	0	0	0	0	0	0	0	0	0	0	0	0	0	0	FALSE
283	ANG	0	0	0	0	0	0	0	0	0	0	0	0	0	0	0	0	0	0	FALSE
23357	ANGEL1	0	0	0	0	0	0	0	0	0	0	0	0	0	0	0	0	0	0	FALSE
90806	ANGEL2	0	0	0	0	0	0	0	0	0	0	0	0	0	0	0	0	0	0	FALSE
285	ANGPT2	0	0	0	0	0	0	0	0	0	0	0	0	0	0	0	0	0	0	FALSE
51378	ANGPT4	0	0	0	0	0	0	0	0	0	0	0	0	0	0	0	0	0	0	FALSE
9068	ANGPTL1	0	0	0	0	0	0	0	0	0	0	0	0	0	0	0	0	0	0	FALSE
23452	ANGPTL2	0	0	0	0	0	0	0	0	0	0	0	0	0	0	0	0	0	0	FALSE
51129	ANGPTL4	0	0	0	0	0	0	0	0	0	0	0	0	0	0	0	0	0	0	FALSE
253935	ANGPTL5	0	0	0	0	0	0	0	0	0	0	0	0	0	0	0	0	0	0	FALSE
83854	ANGPTL6	0	0	0	0	0	0	0	0	0	0	0	0	0	0	0	0	0	0	FALSE
10218	ANGPTL7	0	0	0	0	0	0	0	0	0	0	0	0	0	0	0	0	0	0	FALSE
55908	ANGPTL8	0	0	0	0	0	0	0	0	0	0	0	0	0	0	0	0	0	0	FALSE
286	ANK1	0	0	0	0	0	0	0	0	0	0	0	0	0	0	0	0	0	0	FALSE
287	ANK2	0	0	0	0	0	0	0	0	0	0	0	0	0	0	0	0	0	0	FALSE
288	ANK3	0	0	0	0	0	0	0	0	0	0	0	0	0	0	0	0	0	0	FALSE
150709	ANKAR	0	0	0	0	0	0	0	0	0	0	0	0	0	0	0	0	0	0	FALSE
63926	ANKEF1	0	0	0	0	0	0	0	0	0	0	0	0	0	0	0	0	0	0	FALSE
162282	ANKFN1	0	0	0	0	0	0	0	0	0	0	0	0	0	0	0	0	0	0	FALSE
51479	ANKFY1	0	0	0	0	0	0	0	0	0	0	0	0	0	0	0	0	0	0	FALSE
56172	ANKH	0	0	0	0	0	0	0	0	0	0	0	0	0	0	0	0	0	0	FALSE
54882	ANKHD1	0	0	0	0	0	0	0	0	0	0	0	0	0	0	0	0	0	0	FALSE
54467	ANKIB1	0	0	0	0	0	0	0	0	0	0	0	0	0	0	0	0	0	0	FALSE
255239	ANKK1	0	0	0	0	0	0	0	0	0	0	0	0	0	0	0	0	0	0	FALSE
126549	ANKLE1	0	0	0	0	0	0	0	0	0	0	0	0	0	0	0	0	0	0	FALSE
23141	ANKLE2	0	0	1	0	0	0	0	0	0	1	0	1	0	0	0	0	0	3	FALSE
51281	ANKMY1	0	0	0	0	0	0	0	0	0	0	0	0	0	0	0	0	0	0	FALSE
57037	ANKMY2	0	0	0	0	0	0	0	0	0	0	0	0	0	0	0	0	0	0	FALSE
57763	ANKRA2	0	0	0	0	0	0	0	0	0	0	0	0	0	0	0	0	0	0	FALSE
27063	ANKRD1	0	0	0	0	0	0	0	0	0	0	0	0	0	0	0	0	0	0	FALSE
55608	ANKRD10	0	0	0	0	0	0	0	0	0	0	0	0	0	0	0	0	0	0	FALSE
29123	ANKRD11	0	0	0	0	0	0	0	0	0	0	0	0	0	0	0	0	0	0	FALSE
23253	ANKRD12	0	0	0	0	0	0	0	0	0	0	0	0	0	0	0	0	0	0	FALSE
88455	ANKRD13A	0	0	0	0	0	0	0	0	0	0	0	0	0	0	0	0	0	0	FALSE
124930	ANKRD13B	0	0	0	0	0	0	0	0	0	0	0	0	0	0	0	0	0	0	FALSE
81573	ANKRD13C	0	0	0	0	0	0	0	0	0	0	0	0	0	0	0	0	0	0	FALSE
338692	ANKRD13D	0	0	0	0	0	0	0	0	0	0	0	0	0	0	0	0	0	0	FALSE
54522	ANKRD16	0	0	0	0	0	0	0	0	0	0	0	0	0	0	0	0	0	0	FALSE
26057	ANKRD17	0	0	0	0	0	0	0	0	0	0	0	0	0	0	0	0	0	0	FALSE
253650	ANKRD18A	0	0	0	0	0	0	0	0	0	0	0	0	0	0	0	0	0	0	FALSE
26287	ANKRD2	0	0	0	0	0	0	0	0	0	0	0	0	0	0	0	0	0	0	FALSE
118932	ANKRD22	0	0	0	0	0	0	0	0	0	0	0	0	0	0	0	0	0	0	FALSE
200539	ANKRD23	0	0	0	0	0	0	0	0	0	0	0	0	0	0	0	0	0	0	FALSE
170961	ANKRD24	0	0	0	0	0	0	0	0	0	0	0	0	0	0	0	0	0	0	FALSE
22852	ANKRD26	0	0	0	0	0	0	0	0	0	0	0	0	0	0	0	0	0	0	FALSE
84079	ANKRD27	0	0	0	0	0	0	0	0	0	0	0	0	0	0	0	0	0	0	FALSE
23243	ANKRD28	0	0	0	0	0	0	0	0	0	0	0	0	0	0	0	0	0	0	FALSE
147463	ANKRD29	0	0	0	0	0	0	0	0	0	0	0	0	0	0	0	0	0	0	FALSE
91074	ANKRD30A	0	0	0	0	0	0	0	0	0	0	0	0	0	0	0	0	0	0	FALSE
374860	ANKRD30B	0	0	0	0	0	0	0	0	0	0	0	0	0	0	0	0	0	0	FALSE
256006	ANKRD31	0	0	0	0	0	0	0	0	0	0	0	0	0	0	0	0	0	0	FALSE
341405	ANKRD33	0	0	0	0	0	0	0	0	0	0	0	0	0	0	0	0	0	0	FALSE
651746	ANKRD33B	0	0	0	0	0	0	0	0	0	0	0	0	0	0	0	0	0	0	FALSE
340120	ANKRD34B	0	0	0	0	0	0	0	0	0	0	0	0	0	0	0	0	0	0	FALSE
390616	ANKRD34C	0	0	0	0	0	0	0	0	0	0	0	0	0	0	0	0	0	0	FALSE
148741	ANKRD35	0	0	0	0	0	0	0	0	0	0	0	0	0	0	0	0	0	0	FALSE
57730	ANKRD36B	0	0	0	0	0	0	0	0	0	0	0	0	0	0	0	0	0	0	FALSE
353322	ANKRD37	0	0	0	0	0	0	0	0	0	0	0	0	0	0	0	0	0	0	FALSE
91369	ANKRD40	0	0	0	0	0	0	0	0	0	0	0	0	0	0	0	0	0	0	FALSE
338699	ANKRD42	0	0	0	0	0	0	0	0	0	0	0	0	0	0	0	0	0	0	FALSE
91526	ANKRD44	0	0	0	0	0	0	0	0	0	0	0	0	0	0	0	0	0	0	FALSE
339416	ANKRD45	0	0	0	0	0	0	0	0	0	0	0	0	0	0	0	0	0	0	FALSE
157567	ANKRD46	0	0	0	0	0	0	0	0	0	0	0	0	0	0	0	0	0	0	FALSE
54851	ANKRD49	0	0	0	0	0	0	0	0	0	0	0	0	0	0	0	0	0	0	FALSE
57182	ANKRD50	0	0	0	0	0	0	0	0	0	0	0	0	0	0	0	0	0	0	FALSE
79998	ANKRD53	0	0	0	0	0	0	0	0	0	0	0	0	0	0	0	0	0	0	FALSE
22881	ANKRD6	0	0	0	0	0	0	0	0	0	0	0	0	0	0	0	0	0	0	FALSE
342850	ANKRD62	0	0	0	0	0	0	0	0	0	0	0	0	0	0	0	0	0	0	FALSE
441869	ANKRD65	0	0	0	0	0	0	0	0	0	0	0	0	0	0	0	0	0	0	FALSE
100287718	ANKRD66	0	0	0	0	0	0	0	0	0	0	0	0	0	0	0	0	0	0	FALSE
56311	ANKRD7	0	0	0	0	0	0	0	0	0	0	0	0	0	0	0	0	0	0	FALSE
23294	ANKS1A	0	0	0	0	0	0	0	0	0	0	0	0	0	0	0	0	0	0	FALSE
124401	ANKS3	0	0	0	0	0	0	0	0	0	0	0	0	0	0	0	0	0	0	FALSE
257629	ANKS4B	0	0	0	0	0	0	0	0	0	0	0	0	0	0	0	0	0	0	FALSE
203286	ANKS6	0	0	0	0	0	0	0	0	0	0	0	0	0	0	0	0	0	0	FALSE
55139	ANKZF1	0	0	0	0	0	0	0	0	0	0	0	0	0	0	0	0	0	0	FALSE
54443	ANLN	0	0	0	0	0	0	0	0	0	0	0	0	0	0	0	0	0	0	FALSE
55107	ANO1	0	0	0	0	0	0	0	0	0	0	0	0	0	0	0	0	0	0	FALSE
55129	ANO10	0	0	0	0	0	0	0	0	0	0	0	0	0	0	0	0	0	0	FALSE
57101	ANO2	0	0	0	0	0	0	0	0	0	0	0	0	0	0	0	0	0	0	FALSE
63982	ANO3	0	0	0	0	0	0	0	0	0	0	0	0	0	0	0	0	0	0	FALSE
203859	ANO5	0	0	0	0	0	0	0	0	0	0	0	0	0	0	0	0	0	0	FALSE
196527	ANO6	0	0	0	0	0	0	0	0	0	0	0	0	0	0	0	0	0	0	FALSE
57719	ANO8	0	0	0	0	0	0	0	0	0	0	0	0	0	0	0	0	0	0	FALSE
3730	ANOS1	0	0	0	0	0	0	0	0	0	0	0	0	0	0	0	0	0	0	FALSE
8125	ANP32A	0	0	0	0	0	0	0	0	0	0	0	0	0	0	0	0	0	0	FALSE
10541	ANP32B	0	0	0	0	0	0	0	0	0	0	0	0	0	0	0	0	0	0	FALSE
23519	ANP32D	0	0	0	0	0	0	0	0	0	0	0	0	0	0	0	0	0	0	FALSE
81611	ANP32E	0	0	0	0	0	0	0	0	0	0	0	0	0	0	0	0	0	0	FALSE
290	ANPEP	0	0	0	0	0	0	0	0	0	0	0	0	0	0	0	0	0	0	FALSE
84168	ANTXR1	0	0	0	0	0	0	0	0	0	0	0	0	0	0	0	0	0	0	FALSE
118429	ANTXR2	0	0	0	0	0	0	0	0	0	0	0	0	0	0	0	0	0	0	FALSE
195977	ANTXRL	0	0	0	0	0	0	0	0	0	0	0	0	0	0	0	0	0	0	FALSE
301	ANXA1	0	0	0	0	0	0	0	0	0	0	0	0	0	0	0	0	0	0	FALSE
11199	ANXA10	0	0	0	0	0	0	0	0	0	0	0	0	0	0	0	0	0	0	FALSE
311	ANXA11	0	0	0	0	0	0	0	0	0	0	0	0	0	0	0	0	0	0	FALSE
312	ANXA13	0	0	0	0	0	0	0	0	0	0	0	0	0	0	0	0	0	0	FALSE
302	ANXA2	0	0	0	0	0	0	0	0	0	0	0	0	0	0	0	0	0	0	FALSE
306	ANXA3	0	0	0	0	0	0	0	0	0	0	0	0	0	0	0	0	0	0	FALSE
307	ANXA4	0	0	0	0	0	0	0	0	0	0	0	0	0	0	0	0	0	0	FALSE
308	ANXA5	0	0	0	0	0	0	0	0	0	0	0	0	0	0	0	0	0	0	FALSE
309	ANXA6	0	0	0	0	0	0	0	0	0	0	0	0	0	0	0	0	0	0	FALSE
310	ANXA7	0	0	0	0	0	0	0	0	0	0	0	0	0	0	0	0	0	0	FALSE
8416	ANXA9	0	0	0	0	0	0	0	0	0	0	0	0	0	0	0	0	0	0	FALSE
313	AOAH	0	0	0	0	0	0	0	0	0	0	0	0	0	0	0	0	0	0	FALSE
26	AOC1	0	0	0	0	0	0	0	0	0	0	0	0	0	0	0	0	0	0	FALSE
314	AOC2	0	0	0	0	0	0	0	0	0	0	0	0	0	0	0	0	0	0	FALSE
8639	AOC3	0	0	0	0	0	0	0	0	0	0	0	0	0	0	0	0	0	0	FALSE
316	AOX1	0	0	0	0	0	0	0	0	0	0	0	0	0	0	0	0	0	0	FALSE
55435	AP1AR	0	0	0	0	0	0	0	0	0	0	0	0	0	0	0	0	0	0	FALSE
162	AP1B1	0	0	0	0	0	0	0	0	0	0	0	0	0	0	0	0	0	0	FALSE
164	AP1G1	0	0	0	0	0	0	0	0	0	0	0	0	0	0	0	0	0	0	FALSE
8906	AP1G2	0	0	0	0	0	0	0	0	0	0	0	0	0	0	0	0	0	0	FALSE
8907	AP1M1	0	0	0	0	0	0	0	0	0	0	0	0	0	0	0	0	0	0	FALSE
10053	AP1M2	0	0	0	0	0	0	0	0	0	0	0	0	0	0	0	0	0	0	FALSE
1174	AP1S1	0	0	0	0	0	0	0	0	0	0	0	0	0	0	0	0	0	0	FALSE
8905	AP1S2	0	0	0	0	0	0	0	0	0	0	0	0	0	0	0	0	0	0	FALSE
130340	AP1S3	0	0	0	0	0	0	0	0	0	0	0	0	0	0	0	0	0	0	FALSE
160	AP2A1	0	0	0	0	0	0	0	0	0	0	0	0	0	0	0	0	0	0	FALSE
161	AP2A2	0	0	0	0	0	0	0	0	0	0	0	0	0	0	0	0	0	0	FALSE
163	AP2B1	0	0	0	0	0	0	0	0	0	0	0	0	0	0	0	0	0	0	FALSE
1173	AP2M1	0	1	1	1	1	1	0	1	1	1	1	1	1	1	1	0	0	13	FALSE
1175	AP2S1	0	0	0	0	0	0	0	0	0	0	0	0	0	0	0	0	0	0	FALSE
8546	AP3B1	0	0	0	0	0	0	0	0	0	0	0	0	0	0	0	0	0	0	FALSE
8943	AP3D1	0	0	0	0	0	0	0	0	0	0	0	0	0	0	0	0	0	0	FALSE
26985	AP3M1	0	0	0	0	0	0	0	0	0	0	0	0	0	0	0	0	0	0	FALSE
10947	AP3M2	0	0	0	0	0	0	0	0	0	0	0	0	0	0	0	0	0	0	FALSE
1176	AP3S1	0	0	0	0	0	0	0	0	0	0	0	0	0	0	0	0	0	0	FALSE
10239	AP3S2	0	0	0	0	0	0	0	0	0	0	0	0	0	0	0	0	0	0	FALSE
10717	AP4B1	0	0	0	0	0	0	0	0	0	0	0	0	0	0	0	0	0	0	FALSE
23431	AP4E1	0	0	0	0	0	0	0	0	0	0	0	0	0	0	0	0	0	0	FALSE
9179	AP4M1	0	0	0	0	0	0	0	0	0	0	0	0	0	0	0	0	0	0	FALSE
11154	AP4S1	0	0	0	0	0	0	0	0	0	0	0	0	0	0	0	0	0	0	FALSE
55745	AP5M1	0	0	0	0	0	0	0	0	0	0	0	0	0	0	0	0	0	0	FALSE
317	APAF1	0	0	0	0	0	0	0	0	0	0	0	0	0	0	0	0	0	0	FALSE
320	APBA1	0	0	0	0	0	0	0	0	0	0	0	0	0	0	0	0	0	0	FALSE
321	APBA2	0	0	0	0	0	0	0	0	0	0	0	0	0	0	0	0	0	0	FALSE
9546	APBA3	0	0	0	0	0	0	0	0	0	0	0	0	0	0	0	0	0	0	FALSE
322	APBB1	0	0	0	0	0	0	0	0	0	0	0	0	0	0	0	0	0	0	FALSE
54518	APBB1IP	0	0	0	0	0	0	0	0	0	0	0	0	0	0	0	0	0	0	FALSE
323	APBB2	0	0	0	0	0	0	0	0	0	0	0	0	0	0	0	0	0	0	FALSE
10307	APBB3	0	0	0	0	0	0	0	0	0	0	0	0	0	0	0	0	0	0	FALSE
324	APC	0	0	0	0	0	0	0	0	0	0	0	0	0	0	0	0	0	0	FALSE
10297	APC2	0	0	0	0	0	0	0	0	0	0	0	0	0	0	0	0	0	0	FALSE
147495	APCDD1	0	0	0	0	0	0	0	0	0	0	0	0	0	0	0	0	0	0	FALSE
164284	APCDD1L	0	0	0	0	0	0	0	0	0	0	0	0	0	0	0	0	0	0	FALSE
325	APCS	0	0	0	0	0	0	0	0	0	0	0	0	0	0	0	0	0	0	FALSE
327	APEH	0	0	0	0	0	0	0	0	0	0	0	0	0	0	0	0	0	0	FALSE
328	APEX1	0	0	0	0	0	0	0	0	0	0	0	0	0	0	0	0	0	0	FALSE
27301	APEX2	0	0	0	0	0	0	0	0	0	0	0	0	0	0	0	0	0	0	FALSE
51107	APH1A	0	0	0	0	0	0	0	0	0	0	0	0	0	0	0	0	0	0	FALSE
83464	APH1B	0	0	0	0	0	0	0	0	0	0	0	0	0	0	0	0	0	0	FALSE
8539	API5	0	0	0	0	0	0	0	0	0	0	0	0	0	0	0	0	0	0	FALSE
51074	APIP	0	0	0	0	0	0	0	0	0	0	0	0	0	0	0	0	0	0	FALSE
200558	APLF	0	0	0	0	0	0	0	0	0	0	0	0	0	0	0	0	0	0	FALSE
8862	APLN	0	0	0	0	0	0	0	0	0	0	0	0	0	0	0	0	0	0	FALSE
187	APLNR	0	0	0	0	0	0	0	0	0	0	0	0	0	0	0	0	0	0	FALSE
333	APLP1	0	0	0	0	0	0	0	0	0	0	0	0	0	0	0	0	0	0	FALSE
334	APLP2	0	0	0	0	0	0	0	0	0	0	0	0	0	0	0	0	0	0	FALSE
57136	APMAP	0	0	0	0	0	0	0	0	0	0	0	0	0	0	0	0	0	0	FALSE
335	APOA1	0	0	0	0	0	0	0	0	0	0	0	0	0	0	0	0	0	0	FALSE
336	APOA2	0	0	0	0	0	0	0	0	0	0	0	0	0	0	0	0	0	0	FALSE
337	APOA4	0	0	0	0	0	0	0	0	0	0	0	0	0	0	0	0	0	0	FALSE
116519	APOA5	0	0	0	0	0	0	0	0	0	0	0	0	0	0	0	0	0	0	FALSE
338	APOB	0	0	0	0	0	0	0	0	0	0	0	0	0	0	0	0	0	0	FALSE
339	APOBEC1	0	0	0	0	0	0	0	0	0	0	0	0	0	0	0	0	0	0	FALSE
10930	APOBEC2	0	0	0	0	0	0	0	0	0	0	0	0	0	0	0	0	0	0	FALSE
200315	APOBEC3A	0	0	0	0	0	0	0	0	0	0	0	0	0	0	0	0	0	0	FALSE
9582	APOBEC3B	0	0	0	0	0	0	0	0	0	0	0	0	0	0	0	0	0	0	FALSE
27350	APOBEC3C	0	0	0	0	0	0	0	0	0	0	0	0	0	0	0	0	0	0	FALSE
140564	APOBEC3D	0	0	0	0	0	0	0	0	0	0	0	0	0	0	0	0	0	0	FALSE
200316	APOBEC3F	0	0	0	0	0	0	0	0	0	0	0	0	0	0	0	0	0	0	FALSE
60489	APOBEC3G	0	0	0	0	0	0	0	0	0	0	0	0	0	0	0	0	0	0	FALSE
164668	APOBEC3H	0	0	0	0	0	0	0	0	0	0	0	0	0	0	0	0	0	0	FALSE
403314	APOBEC4	0	0	0	0	0	0	0	0	0	0	0	0	0	0	0	0	0	0	FALSE
55911	APOBR	0	0	0	0	0	0	0	0	0	0	0	0	0	0	0	0	0	0	FALSE
341	APOC1	0	0	0	0	0	0	0	0	0	0	0	0	0	0	0	0	0	0	FALSE
344	APOC2	0	0	0	0	0	0	0	0	0	0	0	0	0	0	0	0	0	0	FALSE
345	APOC3	0	0	0	0	0	0	0	0	0	0	0	0	0	0	0	0	0	0	FALSE
346	APOC4	0	0	0	0	0	0	0	0	0	0	0	0	0	0	0	0	0	0	FALSE
347	APOD	0	0	0	0	0	0	0	0	0	0	0	0	0	0	0	0	0	0	FALSE
348	APOE	0	0	0	0	0	0	0	0	0	0	0	0	0	0	0	0	0	0	FALSE
319	APOF	0	0	0	0	0	0	0	0	0	0	0	0	0	0	0	0	0	0	FALSE
350	APOH	0	0	0	0	0	0	0	0	0	0	0	0	0	0	0	0	0	0	FALSE
8542	APOL1	0	0	0	0	0	0	0	0	0	0	0	0	0	0	0	0	0	0	FALSE
23780	APOL2	0	0	0	0	0	0	0	0	0	0	0	0	0	0	0	0	0	0	FALSE
80833	APOL3	0	0	0	0	0	0	0	0	0	0	0	0	0	0	0	0	0	0	FALSE
80831	APOL5	0	0	0	0	0	0	0	0	0	0	0	0	0	0	0	0	0	0	FALSE
80830	APOL6	0	0	0	0	0	0	0	0	0	0	0	0	0	0	0	0	0	0	FALSE
81575	APOLD1	0	0	0	0	0	0	0	0	0	0	0	0	0	0	0	0	0	0	FALSE
55937	APOM	0	0	0	0	0	0	0	0	0	0	0	0	0	0	0	0	0	0	FALSE
79135	APOO	0	0	0	0	0	0	0	0	0	0	0	0	0	0	0	0	0	0	FALSE
139322	APOOL	0	0	0	0	0	0	0	0	0	0	0	0	0	0	0	0	0	0	FALSE
84334	COA8	0	0	0	0	0	0	0	0	0	0	0	0	0	0	0	0	0	0	FALSE
351	APP	0	0	0	0	0	0	0	0	0	0	0	0	0	0	0	0	0	0	FALSE
10513	APPBP2	0	0	0	0	0	0	0	0	0	0	0	0	0	0	0	0	0	0	FALSE
26060	APPL1	0	0	0	0	0	0	0	0	0	0	0	0	0	0	0	0	0	0	FALSE
55198	APPL2	0	0	0	0	0	0	0	0	0	0	0	0	0	0	0	0	0	0	FALSE
353	APRT	0	0	0	0	0	0	0	0	0	0	0	0	0	0	0	0	0	0	FALSE
54840	APTX	0	0	0	0	0	0	0	0	0	0	0	0	0	0	0	0	0	0	FALSE
358	AQP1	0	0	0	0	0	0	0	0	0	0	0	0	0	0	0	0	0	0	FALSE
89872	AQP10	0	0	0	0	0	0	0	0	0	0	0	0	0	0	0	0	0	0	FALSE
282679	AQP11	0	0	0	0	0	0	0	0	0	0	0	0	0	0	0	0	0	0	FALSE
653437	AQP12B	0	0	0	0	0	0	0	0	0	0	0	0	0	0	0	0	0	0	FALSE
359	AQP2	0	0	0	0	0	0	0	0	0	0	0	0	0	0	0	0	0	0	FALSE
360	AQP3	0	0	0	0	0	0	0	0	0	0	0	0	0	0	0	0	0	0	FALSE
361	AQP4	0	0	0	0	0	0	0	0	0	0	0	0	0	0	0	0	0	0	FALSE
362	AQP5	0	0	0	0	0	0	0	0	0	0	0	0	0	0	0	0	0	0	FALSE
363	AQP6	0	0	0	0	0	0	0	0	0	0	0	0	0	0	0	0	0	0	FALSE
364	AQP7	0	0	0	0	0	0	0	0	0	0	0	0	0	0	0	0	0	0	FALSE
343	AQP8	0	0	0	0	0	0	0	0	0	0	0	0	0	0	0	0	0	0	FALSE
366	AQP9	0	0	0	0	0	0	0	0	0	0	0	0	0	0	0	0	0	0	FALSE
9716	AQR	1	1	1	0	1	1	0	1	0	1	0	1	0	1	1	0	0	10	FALSE
367	AR	0	0	0	0	0	0	0	0	0	0	0	0	0	0	0	0	0	0	FALSE
369	ARAF	0	0	0	0	0	0	0	0	0	0	0	0	0	0	0	0	0	0	FALSE
116985	ARAP1	0	0	0	0	0	0	0	0	0	0	0	0	0	0	0	0	0	0	FALSE
116984	ARAP2	0	0	0	0	0	0	0	0	0	0	0	0	0	0	0	0	0	0	FALSE
64411	ARAP3	0	0	0	0	0	0	0	0	0	0	0	0	0	0	0	0	0	0	FALSE
23237	ARC	0	0	0	0	0	0	0	0	0	0	0	0	0	0	0	0	0	0	FALSE
372	ARCN1	1	1	1	0	1	1	1	1	0	1	1	1	0	1	1	0	0	12	FALSE
374	AREG	0	0	0	0	0	0	0	0	0	0	0	0	0	0	0	0	0	0	FALSE
9870	AREL1	0	0	0	0	0	0	0	0	0	0	0	0	0	0	0	0	0	0	FALSE
375	ARF1	0	0	0	0	0	0	0	0	0	0	0	0	0	0	0	0	0	0	FALSE
377	ARF3	0	0	0	0	0	0	0	0	0	0	0	0	0	0	0	0	0	0	FALSE
378	ARF4	0	0	0	0	0	0	0	0	0	0	0	0	0	0	0	0	0	0	FALSE
381	ARF5	0	0	0	0	0	0	0	0	0	0	0	0	0	0	0	0	0	0	FALSE
382	ARF6	0	0	0	0	0	0	0	0	0	0	0	0	0	0	0	0	0	0	FALSE
55738	ARFGAP1	0	0	0	0	0	0	0	0	0	0	0	0	0	0	0	0	0	0	FALSE
84364	ARFGAP2	0	0	0	0	0	0	0	0	0	0	0	0	0	0	0	0	0	0	FALSE
26286	ARFGAP3	0	0	0	0	0	0	0	0	0	0	0	0	0	0	0	0	0	0	FALSE
10565	ARFGEF1	0	0	0	0	0	0	0	0	0	0	0	0	0	0	0	0	0	0	FALSE
57221	ARFGEF3	0	0	0	0	0	0	0	0	0	0	0	0	0	0	0	0	0	0	FALSE
27236	ARFIP1	0	0	0	0	0	0	0	0	0	0	0	0	0	0	0	0	0	0	FALSE
23647	ARFIP2	0	0	0	0	0	0	0	0	0	0	0	0	0	0	0	0	0	0	FALSE
10139	ARFRP1	0	0	0	0	0	0	0	0	0	0	0	0	0	0	0	0	0	0	FALSE
383	ARG1	0	0	0	0	0	0	0	0	0	0	0	0	0	0	0	0	0	0	FALSE
384	ARG2	0	0	0	0	0	0	0	0	0	0	0	0	0	0	0	0	0	0	FALSE
503582	ARGFX	0	0	0	0	0	0	0	0	0	0	0	0	0	0	0	0	0	0	FALSE
55082	ARGLU1	0	0	0	0	0	0	0	0	0	0	0	0	0	0	0	0	0	0	FALSE
392	ARHGAP1	0	0	0	0	0	0	0	0	0	0	0	0	0	0	0	0	0	0	FALSE
79658	ARHGAP10	0	0	0	0	0	0	0	0	0	0	0	0	0	0	0	0	0	0	FALSE
9824	ARHGAP11A	0	0	0	0	0	0	0	0	0	0	0	0	0	0	0	0	0	0	FALSE
89839	ARHGAP11B	0	0	0	0	0	0	0	0	0	0	0	0	0	0	0	0	0	0	FALSE
94134	ARHGAP12	0	0	0	0	0	0	0	0	0	0	0	0	0	0	0	0	0	0	FALSE
55843	ARHGAP15	0	0	0	0	0	0	0	0	0	0	0	0	0	0	0	0	0	0	FALSE
55114	ARHGAP17	0	0	0	0	0	0	0	0	0	0	0	0	0	0	0	0	0	0	FALSE
93663	ARHGAP18	0	0	0	0	0	0	0	0	0	0	0	0	0	0	0	0	0	0	FALSE
84986	ARHGAP19	0	0	0	0	0	0	0	0	0	0	0	0	0	0	0	0	0	0	FALSE
57569	ARHGAP20	0	0	0	0	0	0	0	0	0	0	0	0	0	0	0	0	0	0	FALSE
57584	ARHGAP21	0	0	0	0	0	0	0	0	0	0	0	0	0	0	0	0	0	0	FALSE
58504	ARHGAP22	0	0	0	0	0	0	0	0	0	0	0	0	0	0	0	0	0	0	FALSE
57636	ARHGAP23	0	0	0	0	0	0	0	0	0	0	0	0	0	0	0	0	0	0	FALSE
83478	ARHGAP24	0	0	0	0	0	0	0	0	0	0	0	0	0	0	0	0	0	0	FALSE
9938	ARHGAP25	0	0	0	0	0	0	0	0	0	0	0	0	0	0	0	0	0	0	FALSE
23092	ARHGAP26	0	0	0	0	0	0	0	0	0	0	0	0	0	0	0	0	0	0	FALSE
201176	ARHGAP27	0	0	0	0	0	0	0	0	0	0	0	0	0	0	0	0	0	0	FALSE
79822	ARHGAP28	0	0	0	0	0	0	0	0	0	0	0	0	0	0	0	0	0	0	FALSE
9411	ARHGAP29	0	0	0	0	0	0	0	0	0	0	0	0	0	0	0	0	0	0	FALSE
257106	ARHGAP30	0	0	0	0	0	0	0	0	0	0	0	0	0	0	0	0	0	0	FALSE
57514	ARHGAP31	0	0	0	0	0	0	0	0	0	0	0	0	0	0	0	0	0	0	FALSE
9743	ARHGAP32	0	0	0	0	0	0	0	0	0	0	0	0	0	0	0	0	0	0	FALSE
115703	ARHGAP33	0	0	0	0	0	0	0	0	0	0	0	0	0	0	0	0	0	0	FALSE
2909	ARHGAP35	0	0	0	0	0	0	0	0	0	0	0	0	0	0	0	0	0	0	FALSE
158763	ARHGAP36	0	0	0	0	0	0	0	0	0	0	0	0	0	0	0	0	0	0	FALSE
80728	ARHGAP39	0	0	0	0	0	0	0	0	0	0	0	0	0	0	0	0	0	0	FALSE
393	ARHGAP4	0	0	0	0	0	0	0	0	0	0	0	0	0	0	0	0	0	0	FALSE
9912	ARHGAP44	0	0	0	0	0	0	0	0	0	0	0	0	0	0	0	0	0	0	FALSE
23526	ARHGAP45	0	0	0	0	0	0	0	0	0	0	0	0	0	0	0	0	0	0	FALSE
394	ARHGAP5	0	0	0	0	0	0	0	0	0	0	0	0	0	0	0	0	0	0	FALSE
395	ARHGAP6	0	0	0	0	0	0	0	0	0	0	0	0	0	0	0	0	0	0	FALSE
23779	ARHGAP8	0	0	0	0	0	0	0	0	0	0	0	0	0	0	0	0	0	0	FALSE
64333	ARHGAP9	0	0	0	0	0	0	0	0	0	0	0	0	0	0	0	0	0	0	FALSE
396	ARHGDIA	0	0	0	0	0	0	0	0	0	0	0	0	0	0	0	0	0	0	FALSE
397	ARHGDIB	0	0	0	0	0	0	0	0	0	0	0	0	0	0	0	0	0	0	FALSE
398	ARHGDIG	0	0	0	0	0	0	0	0	0	0	0	0	0	0	0	0	0	0	FALSE
9138	ARHGEF1	0	0	0	0	0	0	0	0	0	0	0	0	0	0	0	0	0	0	FALSE
9639	ARHGEF10	0	0	0	0	0	0	0	0	0	0	0	0	0	0	0	0	0	0	FALSE
55160	ARHGEF10L	0	0	0	0	0	0	0	0	0	0	0	0	0	0	0	0	0	0	FALSE
9826	ARHGEF11	0	0	0	0	0	0	0	0	0	0	0	0	0	0	0	0	0	0	FALSE
23365	ARHGEF12	0	0	0	0	0	0	0	0	0	0	0	0	0	0	0	0	0	0	FALSE
22899	ARHGEF15	0	0	0	0	0	0	0	0	0	0	0	0	0	0	0	0	0	0	FALSE
27237	ARHGEF16	0	0	0	0	0	0	0	0	0	0	0	0	0	0	0	0	0	0	FALSE
23370	ARHGEF18	0	0	0	0	0	0	0	0	0	0	0	0	0	0	0	0	0	0	FALSE
128272	ARHGEF19	0	0	0	0	0	0	0	0	0	0	0	0	0	0	0	0	0	0	FALSE
9181	ARHGEF2	0	0	0	0	0	0	0	0	0	0	0	0	0	0	0	0	0	0	FALSE
115557	ARHGEF25	0	0	0	0	0	0	0	0	0	0	0	0	0	0	0	0	0	0	FALSE
26084	ARHGEF26	0	0	0	0	0	0	0	0	0	0	0	0	0	0	0	0	0	0	FALSE
64283	ARHGEF28	0	0	0	0	0	0	0	0	0	0	0	0	0	0	0	0	0	0	FALSE
50650	ARHGEF3	0	0	0	0	0	0	0	0	0	0	0	0	0	0	0	0	0	0	FALSE
100271715	ARHGEF33	0	0	0	0	0	0	0	0	0	0	0	0	0	0	0	0	0	0	FALSE
445328	ARHGEF35	0	0	0	0	0	0	0	0	0	0	0	0	0	0	0	0	0	0	FALSE
389337	ARHGEF37	0	0	0	0	0	0	0	0	0	0	0	0	0	0	0	0	0	0	FALSE
54848	ARHGEF38	0	0	0	0	0	0	0	0	0	0	0	0	0	0	0	0	0	0	FALSE
84904	ARHGEF39	0	0	0	0	0	0	0	0	0	0	0	0	0	0	0	0	0	0	FALSE
50649	ARHGEF4	0	0	0	0	0	0	0	0	0	0	0	0	0	0	0	0	0	0	FALSE
55701	ARHGEF40	0	0	0	0	0	0	0	0	0	0	0	0	0	0	0	0	0	0	FALSE
7984	ARHGEF5	0	0	0	0	0	0	0	0	0	0	0	0	0	0	0	0	0	0	FALSE
9459	ARHGEF6	0	0	0	0	0	0	0	0	0	0	0	0	0	0	0	0	0	0	FALSE
8874	ARHGEF7	0	0	0	0	0	0	0	0	0	0	0	0	0	0	0	0	0	0	FALSE
23229	ARHGEF9	0	0	0	0	0	0	0	0	0	0	0	0	0	0	0	0	0	0	FALSE
8289	ARID1A	0	0	0	0	0	0	0	0	0	0	0	0	0	0	0	0	0	0	FALSE
57492	ARID1B	0	0	0	0	0	0	0	0	0	0	0	0	0	0	0	0	0	0	FALSE
196528	ARID2	0	0	0	0	0	0	0	0	0	0	0	0	0	0	0	0	0	0	FALSE
1820	ARID3A	0	0	0	0	0	0	0	0	0	0	0	0	0	0	0	0	0	0	FALSE
10620	ARID3B	0	0	0	0	0	0	0	0	0	0	0	0	0	0	0	0	0	0	FALSE
138715	ARID3C	0	0	0	0	0	0	0	0	0	0	0	0	0	0	0	0	0	0	FALSE
5926	ARID4A	0	0	0	0	0	0	0	0	0	0	0	0	0	0	0	0	0	0	FALSE
51742	ARID4B	0	0	0	0	0	0	0	0	0	0	0	0	0	0	0	0	0	0	FALSE
10865	ARID5A	0	0	0	0	0	0	0	0	0	0	0	0	0	0	0	0	0	0	FALSE
84159	ARID5B	0	0	0	0	0	0	0	0	0	0	0	0	0	0	0	0	0	0	FALSE
25820	ARIH1	0	1	0	0	0	0	0	0	1	1	0	0	0	0	0	0	0	3	FALSE
10425	ARIH2	0	0	0	0	0	0	0	0	0	0	0	0	0	0	0	0	0	0	FALSE
400	ARL1	0	0	0	0	0	0	0	0	0	0	0	0	0	0	0	0	0	0	FALSE
285598	ARL10	0	0	0	0	0	0	0	0	0	0	0	0	0	0	0	0	0	0	FALSE
115761	ARL11	0	0	0	0	0	0	0	0	0	0	0	0	0	0	0	0	0	0	FALSE
392509	ARL13A	0	0	0	0	0	0	0	0	0	0	0	0	0	0	0	0	0	0	FALSE
200894	ARL13B	0	0	0	0	0	0	0	0	0	0	0	0	0	0	0	0	0	0	FALSE
80117	ARL14	0	0	0	0	0	0	0	0	0	0	0	0	0	0	0	0	0	0	FALSE
120534	ARL14EP	0	0	0	0	0	0	0	0	0	0	0	0	0	0	0	0	0	0	FALSE
54622	ARL15	0	0	0	0	0	0	0	0	0	0	0	0	0	0	0	0	0	0	FALSE
339231	ARL16	0	0	0	0	0	0	0	0	0	0	0	0	0	0	0	0	0	0	FALSE
51326	ARL17A	0	0	0	0	0	0	0	0	0	0	0	0	0	0	0	0	0	0	FALSE
402	ARL2	0	0	0	0	0	0	0	0	0	0	0	0	0	0	0	0	0	0	FALSE
23568	ARL2BP	0	0	0	0	0	0	0	0	0	0	0	0	0	0	0	0	0	0	FALSE
403	ARL3	0	0	0	0	0	0	0	0	0	0	0	0	0	0	0	0	0	0	FALSE
10124	ARL4A	0	0	0	0	0	0	0	0	0	0	0	0	0	0	0	0	0	0	FALSE
10123	ARL4C	0	0	0	0	0	0	0	0	0	0	0	0	0	0	0	0	0	0	FALSE
379	ARL4D	0	0	0	0	0	0	0	0	0	0	0	0	0	0	0	0	0	0	FALSE
26225	ARL5A	0	0	0	0	0	0	0	0	0	0	0	0	0	0	0	0	0	0	FALSE
221079	ARL5B	0	0	0	0	0	0	0	0	0	0	0	0	0	0	0	0	0	0	FALSE
390790	ARL5C	0	0	0	0	0	0	0	0	0	0	0	0	0	0	0	0	0	0	FALSE
84100	ARL6	0	0	0	0	0	0	0	0	0	0	0	0	0	0	0	0	0	0	FALSE
23204	ARL6IP1	0	0	0	0	0	0	0	0	0	0	0	0	0	0	0	0	0	0	FALSE
51329	ARL6IP4	0	0	0	0	0	0	0	0	0	0	0	0	0	0	0	0	0	0	FALSE
10550	ARL6IP5	0	0	0	0	0	0	0	0	0	0	0	0	0	0	0	0	0	0	FALSE
127829	ARL8A	0	0	0	0	0	0	0	0	0	0	0	0	0	0	0	0	0	0	FALSE
55207	ARL8B	0	0	0	0	0	0	0	0	0	0	0	0	0	0	0	0	0	0	FALSE
132946	ARL9	0	0	0	0	0	0	0	0	0	0	0	0	0	0	0	0	0	0	FALSE
55156	ARMC1	0	0	0	0	0	0	0	0	0	0	0	0	0	0	0	0	0	0	FALSE
83787	ARMC10	0	0	0	0	0	0	0	0	0	0	0	0	0	0	0	0	0	0	FALSE
84071	ARMC2	0	0	0	0	0	0	0	0	0	0	0	0	0	0	0	0	0	0	FALSE
219681	ARMC3	0	0	0	0	0	0	0	0	0	0	0	0	0	0	0	0	0	0	FALSE
55130	ARMC4	0	0	0	0	0	0	0	0	0	0	0	0	0	0	0	0	0	0	FALSE
79798	ARMC5	0	0	0	0	0	0	0	0	0	0	0	0	0	0	0	0	0	0	FALSE
93436	ARMC6	0	0	0	0	0	0	0	0	0	0	0	0	0	0	0	0	0	0	FALSE
79637	ARMC7	0	0	0	0	0	0	0	0	0	0	0	0	0	0	0	0	0	0	FALSE
25852	ARMC8	0	0	0	0	0	0	0	0	0	0	0	0	0	0	0	0	0	0	FALSE
51309	ARMCX1	0	0	0	0	0	0	0	0	0	0	0	0	0	0	0	0	0	0	FALSE
9823	ARMCX2	0	0	0	0	0	0	0	0	0	0	0	0	0	0	0	0	0	0	FALSE
51566	ARMCX3	0	0	0	0	0	0	0	0	0	0	0	0	0	0	0	0	0	0	FALSE
64860	ARMCX5	0	0	0	0	0	0	0	0	0	0	0	0	0	0	0	0	0	0	FALSE
54470	ARMCX6	0	0	0	0	0	0	0	0	0	0	0	0	0	0	0	0	0	0	FALSE
339541	ARMH1	0	0	0	0	0	0	0	0	0	0	0	0	0	0	0	0	0	0	FALSE
79591	ARMH3	0	0	0	0	0	0	0	0	0	0	0	0	0	0	0	0	0	0	FALSE
145407	ARMH4	0	1	0	0	0	0	0	0	0	0	0	0	0	0	0	0	0	1	FALSE
405	ARNT	0	0	0	0	0	0	0	0	0	0	0	0	0	0	0	0	0	0	FALSE
9915	ARNT2	0	0	0	0	0	0	0	0	0	0	0	0	0	0	0	0	0	0	FALSE
406	ARNTL	0	0	0	0	0	0	0	0	0	0	0	0	0	0	0	0	0	0	FALSE
56938	ARNTL2	0	0	0	0	0	0	0	0	0	0	0	0	0	0	0	0	0	0	FALSE
10552	ARPC1A	0	0	0	0	0	0	0	0	0	0	0	0	0	0	0	0	0	0	FALSE
10095	ARPC1B	0	0	0	0	0	0	0	0	0	0	0	0	0	0	0	0	0	0	FALSE
10109	ARPC2	0	0	0	0	0	0	0	0	0	0	0	0	0	0	0	0	0	0	FALSE
10094	ARPC3	0	0	0	0	0	0	0	0	0	0	0	0	0	0	0	0	0	0	FALSE
10093	ARPC4	0	0	0	0	0	0	0	0	0	0	0	0	0	0	0	0	0	0	FALSE
10092	ARPC5	0	0	0	0	0	0	0	0	0	0	0	0	0	0	0	0	0	0	FALSE
81873	ARPC5L	0	0	0	0	0	0	0	0	0	0	0	0	0	0	0	0	0	0	FALSE
348110	ARPIN	0	0	0	0	0	0	0	0	0	0	0	0	0	0	0	0	0	0	FALSE
10776	ARPP19	0	0	0	0	0	0	0	0	0	0	0	0	0	0	0	0	0	0	FALSE
10777	ARPP21	0	0	0	0	0	0	0	0	0	0	0	0	0	0	0	0	0	0	FALSE
407	ARR3	0	0	0	0	0	0	0	0	0	0	0	0	0	0	0	0	0	0	FALSE
408	ARRB1	0	0	0	0	0	0	0	0	0	0	0	0	0	0	0	0	0	0	FALSE
409	ARRB2	0	0	0	0	0	0	0	0	0	0	0	0	0	0	0	0	0	0	FALSE
92714	ARRDC1	0	0	0	0	0	0	0	0	0	0	0	0	0	0	0	0	0	0	FALSE
27106	ARRDC2	0	0	0	0	0	0	0	0	0	0	0	0	0	0	0	0	0	0	FALSE
91947	ARRDC4	0	0	0	0	0	0	0	0	0	0	0	0	0	0	0	0	0	0	FALSE
410	ARSA	0	0	0	0	0	0	0	0	0	0	0	0	0	0	0	0	0	0	FALSE
411	ARSB	0	0	0	0	0	0	0	0	0	0	0	0	0	0	0	0	0	0	FALSE
414	ARSD	0	0	0	0	0	0	0	0	0	0	0	0	0	0	0	0	0	0	FALSE
415	ARSE	0	0	0	0	0	0	0	0	0	0	0	0	0	0	0	0	0	0	FALSE
416	ARSF	0	0	0	0	0	0	0	0	0	0	0	0	0	0	0	0	0	0	FALSE
22901	ARSG	0	0	0	0	0	0	0	0	0	0	0	0	0	0	0	0	0	0	FALSE
347527	ARSH	0	0	0	0	0	0	0	0	0	0	0	0	0	0	0	0	0	0	FALSE
340075	ARSI	0	0	0	0	0	0	0	0	0	0	0	0	0	0	0	0	0	0	FALSE
79642	ARSJ	0	0	0	0	0	0	0	0	0	0	0	0	0	0	0	0	0	0	FALSE
153642	ARSK	0	0	0	0	0	0	0	0	0	0	0	0	0	0	0	0	0	0	FALSE
417	ART1	0	0	0	0	0	0	0	0	0	0	0	0	0	0	0	0	0	0	FALSE
419	ART3	0	0	0	0	0	0	0	0	0	0	0	0	0	0	0	0	0	0	FALSE
420	ART4	0	0	0	0	0	0	0	0	0	0	0	0	0	0	0	0	0	0	FALSE
116969	ART5	0	0	0	0	0	0	0	0	0	0	0	0	0	0	0	0	0	0	FALSE
64801	ARV1	0	0	0	0	0	0	0	0	0	0	0	0	0	0	0	0	0	0	FALSE
421	ARVCF	0	0	0	0	0	0	0	0	0	0	0	0	0	0	0	0	0	0	FALSE
170302	ARX	0	0	0	0	0	0	0	0	0	0	0	0	0	0	0	0	0	0	FALSE
57412	AS3MT	0	0	0	0	0	0	0	0	0	0	0	0	0	0	0	0	0	0	FALSE
56624	ASAH2	0	0	0	0	0	0	0	0	0	0	0	0	0	0	0	0	0	0	FALSE
50807	ASAP1	0	0	0	0	0	0	0	0	0	0	0	0	0	0	0	0	0	0	FALSE
8853	ASAP2	0	0	0	0	0	0	0	0	0	0	0	0	0	0	0	0	0	0	FALSE
55616	ASAP3	0	0	0	0	0	0	0	0	0	0	0	0	0	0	0	0	0	0	FALSE
51665	ASB1	0	0	0	0	0	0	0	0	0	0	0	0	0	0	0	0	0	0	FALSE
136371	ASB10	0	0	0	0	0	0	0	0	0	0	0	0	0	0	0	0	0	0	FALSE
140456	ASB11	0	0	0	0	0	0	0	0	0	0	0	0	0	0	0	0	0	0	FALSE
142689	ASB12	0	0	0	0	0	0	0	0	0	0	0	0	0	0	0	0	0	0	FALSE
79754	ASB13	0	0	0	0	0	0	0	0	0	0	0	0	0	0	0	0	0	0	FALSE
142686	ASB14	0	0	0	0	0	0	0	0	0	0	0	0	0	0	0	0	0	0	FALSE
142685	ASB15	0	0	0	0	0	0	0	0	0	0	0	0	0	0	0	0	0	0	FALSE
92591	ASB16	0	0	0	0	0	0	0	0	0	0	0	0	0	0	0	0	0	0	FALSE
127247	ASB17	0	0	0	0	0	0	0	0	0	0	0	0	0	0	0	0	0	0	FALSE
401036	ASB18	0	0	0	0	0	0	0	0	0	0	0	0	0	0	0	0	0	0	FALSE
51130	ASB3	0	0	0	0	0	0	0	0	0	0	0	0	0	0	0	0	0	0	FALSE
51666	ASB4	0	0	0	0	0	0	0	0	0	0	0	0	0	0	0	0	0	0	FALSE
140458	ASB5	0	0	0	0	0	0	0	0	0	0	0	0	0	0	0	0	0	0	FALSE
140459	ASB6	0	0	0	0	0	0	0	0	0	0	0	0	0	0	0	0	0	0	FALSE
140460	ASB7	0	0	0	0	0	0	0	0	0	0	0	0	0	0	0	0	0	0	FALSE
140461	ASB8	0	0	0	0	0	0	0	0	0	0	0	0	0	0	0	0	0	0	FALSE
140462	ASB9	0	0	0	0	0	0	0	0	0	0	0	0	0	0	0	0	0	0	FALSE
51008	ASCC1	0	0	0	0	0	0	0	0	0	0	0	0	0	0	0	0	0	0	FALSE
84164	ASCC2	0	0	0	0	0	0	0	0	0	0	0	0	0	0	0	0	0	0	FALSE
10973	ASCC3	0	0	0	0	0	0	0	0	0	0	0	0	0	0	0	0	0	0	FALSE
429	ASCL1	0	0	0	0	0	0	0	0	0	0	0	0	0	0	0	0	0	0	FALSE
430	ASCL2	0	0	0	0	0	0	0	0	0	0	0	0	0	0	0	0	0	0	FALSE
56676	ASCL3	0	0	0	0	0	0	0	0	0	0	0	0	0	0	0	0	0	0	FALSE
121549	ASCL4	0	0	0	0	0	0	0	0	0	0	0	0	0	0	0	0	0	0	FALSE
25842	ASF1A	0	0	0	0	0	0	0	0	0	0	0	0	0	0	0	0	0	0	FALSE
55723	ASF1B	0	0	0	0	0	0	0	0	0	0	0	0	0	0	0	0	0	0	FALSE
432	ASGR1	0	0	0	0	0	0	0	0	0	0	0	0	0	0	0	0	0	0	FALSE
433	ASGR2	0	0	0	0	0	0	0	0	0	0	0	0	0	0	0	0	0	0	FALSE
55870	ASH1L	0	0	0	0	0	0	0	0	0	0	0	0	0	0	0	0	0	0	FALSE
9070	ASH2L	0	0	0	1	0	0	0	0	1	1	0	0	0	0	0	0	0	3	FALSE
41	ASIC1	0	0	0	0	0	0	0	0	0	0	0	0	0	0	0	0	0	0	FALSE
40	ASIC2	0	0	0	0	0	0	0	0	0	0	0	0	0	0	0	0	0	0	FALSE
51802	ASIC5	0	0	0	0	0	0	0	0	0	0	0	0	0	0	0	0	0	0	FALSE
434	ASIP	0	0	0	0	0	0	0	0	0	0	0	0	0	0	0	0	0	0	FALSE
435	ASL	0	0	0	0	0	0	0	0	0	0	0	0	0	0	0	0	0	0	FALSE
438	ASMT	0	0	0	0	0	0	0	0	0	0	0	0	0	0	0	0	0	0	FALSE
8623	ASMTL	0	0	0	0	0	0	0	0	0	0	0	0	0	0	0	0	0	0	FALSE
439	ASNA1	0	0	0	0	0	0	0	0	0	0	0	0	0	0	0	0	0	0	FALSE
440	ASNS	0	0	0	0	0	0	0	0	0	0	0	0	0	0	0	0	0	0	FALSE
54529	ASNSD1	0	0	0	0	0	0	0	0	0	0	0	0	0	0	0	0	0	0	FALSE
443	ASPA	0	0	0	0	0	0	0	0	0	0	0	0	0	0	0	0	0	0	FALSE
444	ASPH	0	0	0	0	0	0	0	0	0	0	0	0	0	0	0	0	0	0	FALSE
253982	ASPHD1	0	0	0	0	0	0	0	0	0	0	0	0	0	0	0	0	0	0	FALSE
57168	ASPHD2	0	0	0	0	0	0	0	0	0	0	0	0	0	0	0	0	0	0	FALSE
259266	ASPM	0	0	0	0	0	0	0	0	0	0	0	0	0	0	0	0	0	0	FALSE
151516	ASPRV1	0	0	0	0	0	0	0	0	0	0	0	0	0	0	0	0	0	0	FALSE
80150	ASRGL1	0	0	0	0	0	0	0	0	0	0	0	0	0	0	0	0	0	0	FALSE
445	ASS1	0	0	0	0	0	0	0	0	0	0	0	0	0	0	0	0	0	0	FALSE
28990	ASTE1	0	0	0	0	0	0	0	0	0	0	0	0	0	0	0	0	0	0	FALSE
431705	ASTL	0	0	0	0	0	0	0	0	0	0	0	0	0	0	0	0	0	0	FALSE
460	ASTN1	0	0	0	0	0	0	0	0	0	0	0	0	0	0	0	0	0	0	FALSE
23245	ASTN2	0	0	0	0	0	0	0	0	0	0	0	0	0	0	0	0	0	0	FALSE
171023	ASXL1	0	0	0	0	0	0	0	0	0	0	0	0	0	0	0	0	0	0	FALSE
80816	ASXL3	0	0	0	0	0	0	0	0	0	0	0	0	0	0	0	0	0	0	FALSE
136991	ASZ1	0	0	0	0	0	0	0	0	0	0	0	0	0	0	0	0	0	0	FALSE
84896	ATAD1	0	0	0	0	0	0	0	0	0	0	0	0	0	0	0	0	0	0	FALSE
29028	ATAD2	0	0	0	0	0	0	0	0	0	0	0	0	0	0	0	0	0	0	FALSE
54454	ATAD2B	0	0	0	0	0	0	0	0	0	0	0	0	0	0	0	0	0	0	FALSE
55210	ATAD3A	0	0	0	0	0	0	0	0	0	0	0	0	0	0	0	0	0	0	FALSE
83858	ATAD3B	0	0	0	0	0	0	0	0	0	1	0	0	0	0	0	0	0	1	FALSE
219293	ATAD3C	0	0	0	0	0	0	0	0	0	0	0	0	0	0	0	0	0	0	FALSE
79915	ATAD5	0	0	0	0	0	0	0	0	0	0	0	0	0	0	0	0	0	0	FALSE
79969	ATAT1	0	0	0	0	0	0	0	0	0	0	0	0	0	0	0	0	0	0	FALSE
85300	ATCAY	0	0	0	0	0	0	0	0	0	0	0	0	0	0	0	0	0	0	FALSE
466	ATF1	0	0	0	0	0	0	0	0	0	0	0	0	0	0	0	0	0	0	FALSE
1386	ATF2	0	0	0	0	0	0	0	0	0	0	0	0	0	0	0	0	0	0	FALSE
467	ATF3	0	0	0	0	0	0	0	0	0	0	0	0	0	0	0	0	0	0	FALSE
468	ATF4	0	0	0	0	0	0	0	0	0	0	0	0	0	0	0	0	0	0	FALSE
22926	ATF6	0	0	0	0	0	0	0	0	0	0	0	0	0	0	0	0	0	0	FALSE
1388	ATF6B	0	0	0	0	0	0	0	0	0	0	0	0	0	0	0	0	0	0	FALSE
11016	ATF7	0	0	0	0	0	0	0	0	0	0	0	0	0	0	0	0	0	0	FALSE
55729	ATF7IP	0	0	0	0	0	0	0	0	0	0	0	0	0	0	0	0	0	0	FALSE
80063	ATF7IP2	0	0	0	0	0	0	0	0	0	0	0	0	0	0	0	0	0	0	FALSE
83734	ATG10	0	0	0	0	0	0	0	0	0	0	0	0	0	0	0	0	0	0	FALSE
60673	ATG101	0	0	0	0	0	0	0	0	0	0	0	0	0	0	0	0	0	0	FALSE
9140	ATG12	0	0	0	0	0	0	0	0	0	0	0	0	0	0	0	0	0	0	FALSE
9776	ATG13	0	0	0	0	0	0	0	0	0	0	0	0	0	0	0	0	0	0	FALSE
22863	ATG14	0	0	0	0	0	0	0	0	0	0	0	0	0	0	0	0	0	0	FALSE
55054	ATG16L1	0	0	0	0	0	0	0	0	0	0	0	0	0	0	0	0	0	0	FALSE
89849	ATG16L2	0	0	0	0	0	0	0	0	0	0	0	0	0	0	0	0	0	0	FALSE
23130	ATG2A	0	0	0	0	0	0	0	0	0	0	0	0	0	0	0	0	0	0	FALSE
55102	ATG2B	0	0	0	0	0	0	0	0	0	0	0	0	0	0	0	0	0	0	FALSE
64422	ATG3	0	0	0	0	0	0	0	0	0	0	0	0	0	0	0	0	0	0	FALSE
115201	ATG4A	0	0	0	0	0	0	0	0	0	0	0	0	0	0	0	0	0	0	FALSE
23192	ATG4B	0	0	0	0	0	0	0	0	0	0	0	0	0	0	0	0	0	0	FALSE
84938	ATG4C	0	0	0	0	0	0	0	0	0	0	0	0	0	0	0	0	0	0	FALSE
84971	ATG4D	0	0	0	0	0	0	0	0	0	0	0	0	0	0	0	0	0	0	FALSE
9474	ATG5	0	0	0	0	0	0	0	0	0	0	0	0	0	0	0	0	0	0	FALSE
10533	ATG7	0	0	0	0	0	0	0	0	0	0	0	0	0	0	0	0	0	0	FALSE
79065	ATG9A	0	0	0	0	0	0	0	0	0	0	0	0	0	0	0	0	0	0	FALSE
471	ATIC	0	0	0	0	0	0	0	0	0	0	0	0	0	0	0	0	0	0	FALSE
51062	ATL1	0	0	0	0	0	0	0	0	0	0	0	0	0	0	0	0	0	0	FALSE
64225	ATL2	0	0	0	0	0	0	0	0	0	0	0	0	0	0	0	0	0	0	FALSE
25923	ATL3	0	0	0	0	0	0	0	0	0	0	0	0	0	0	0	0	0	0	FALSE
472	ATM	0	0	0	0	0	0	0	0	0	0	0	0	0	0	0	0	0	0	FALSE
23300	ATMIN	0	0	0	0	0	0	0	0	0	0	0	0	0	0	0	0	0	0	FALSE
1822	ATN1	0	0	0	0	0	0	0	0	0	0	0	0	0	0	0	0	0	0	FALSE
474	ATOH1	0	0	0	0	0	0	0	0	0	0	0	0	0	0	0	0	0	0	FALSE
220202	ATOH7	0	0	0	0	0	0	0	0	0	0	0	0	0	0	0	0	0	0	FALSE
84913	ATOH8	0	0	0	0	0	0	0	0	0	0	0	0	0	0	0	0	0	0	FALSE
475	ATOX1	0	0	0	0	0	0	0	0	0	0	0	0	0	0	0	0	0	0	FALSE
57194	ATP10A	0	0	0	0	0	0	0	0	0	0	0	0	0	0	0	0	0	0	FALSE
23120	ATP10B	0	0	0	0	0	0	0	0	0	0	0	0	0	0	0	0	0	0	FALSE
57205	ATP10D	0	0	0	0	0	0	0	0	0	0	0	0	0	0	0	0	0	0	FALSE
23250	ATP11A	0	0	0	0	0	0	0	0	0	0	0	0	0	0	0	0	0	0	FALSE
23200	ATP11B	0	0	0	0	0	0	0	0	0	0	0	0	0	0	0	0	0	0	FALSE
286410	ATP11C	0	0	0	0	0	0	0	0	0	0	0	0	0	0	0	0	0	0	FALSE
479	ATP12A	0	0	0	0	0	0	0	0	0	0	0	0	0	0	0	0	0	0	FALSE
57130	ATP13A1	0	0	0	0	0	0	0	0	0	0	0	0	0	0	0	0	0	0	FALSE
23400	ATP13A2	0	0	0	0	0	0	0	0	0	0	0	0	0	0	0	0	0	0	FALSE
79572	ATP13A3	0	0	0	0	0	0	0	0	0	0	0	0	0	0	0	0	0	0	FALSE
84239	ATP13A4	0	0	0	0	0	0	0	0	0	0	0	0	0	0	0	0	0	0	FALSE
344905	ATP13A5	0	0	0	0	0	0	0	0	0	0	0	0	0	0	0	0	0	0	FALSE
476	ATP1A1	0	0	0	0	0	0	0	1	0	1	0	0	0	0	0	0	0	2	FALSE
477	ATP1A2	0	0	0	0	0	0	0	0	0	0	0	0	0	0	0	0	0	0	FALSE
478	ATP1A3	0	0	0	0	0	0	0	0	0	0	0	0	0	0	0	0	0	0	FALSE
480	ATP1A4	0	0	0	0	0	0	0	0	0	0	0	0	0	0	0	0	0	0	FALSE
481	ATP1B1	0	0	0	0	0	0	0	0	0	0	0	0	0	0	0	0	0	0	FALSE
482	ATP1B2	0	0	0	0	0	0	0	0	0	0	0	0	0	0	0	0	0	0	FALSE
483	ATP1B3	0	0	0	0	0	0	0	0	0	0	0	0	0	0	0	0	0	0	FALSE
23439	ATP1B4	0	0	0	0	0	0	0	0	0	0	0	0	0	0	0	0	0	0	FALSE
91419	ATP23	0	0	0	0	0	0	0	0	0	0	0	0	0	0	0	0	0	0	FALSE
488	ATP2A2	0	1	1	0	0	0	0	0	1	1	0	0	0	0	0	0	0	4	FALSE
489	ATP2A3	0	0	0	0	0	0	0	0	0	0	0	0	0	0	0	0	0	0	FALSE
490	ATP2B1	0	0	0	0	0	0	0	0	0	0	0	0	0	0	0	0	0	0	FALSE
491	ATP2B2	0	0	0	0	0	0	0	0	0	0	0	0	0	0	0	0	0	0	FALSE
492	ATP2B3	0	0	0	0	0	0	0	0	0	0	0	0	0	0	0	0	0	0	FALSE
493	ATP2B4	0	0	0	0	0	0	0	0	0	0	0	0	0	0	0	0	0	0	FALSE
27032	ATP2C1	0	0	0	0	0	0	0	0	0	0	0	0	0	0	0	0	0	0	FALSE
9914	ATP2C2	0	0	0	0	0	0	0	0	0	0	0	0	0	0	0	0	0	0	FALSE
495	ATP4A	0	0	0	0	0	0	0	0	0	0	0	0	0	0	0	0	0	0	FALSE
496	ATP4B	0	0	0	0	0	0	0	0	0	0	0	0	0	0	0	0	0	0	FALSE
498	ATP5F1A	0	0	0	0	0	0	0	0	0	0	0	0	0	0	0	0	0	0	FALSE
506	ATP5F1B	0	0	0	0	0	0	0	0	0	0	0	0	0	0	0	0	0	0	FALSE
509	ATP5F1C	0	0	0	0	0	0	0	0	0	0	0	0	0	0	0	0	0	0	FALSE
513	ATP5F1D	0	0	0	0	0	0	0	0	0	0	0	0	0	0	0	0	0	0	FALSE
514	ATP5F1E	0	0	0	0	0	0	0	0	0	0	0	0	0	0	0	0	0	0	FALSE
93974	ATP5IF1	0	0	0	0	0	0	0	0	0	0	0	0	0	0	0	0	0	0	FALSE
516	ATP5MC1	0	0	0	0	0	0	0	0	0	0	0	0	0	0	0	0	0	0	FALSE
517	ATP5MC2	0	0	0	0	0	0	0	0	0	0	0	0	0	0	0	0	0	0	FALSE
518	ATP5MC3	0	0	0	0	0	0	0	0	0	0	0	0	0	0	0	0	0	0	FALSE
84833	ATP5MD	0	0	0	0	0	0	0	0	0	0	0	0	0	0	0	0	0	0	FALSE
521	ATP5ME	0	0	0	0	0	0	0	0	0	0	0	0	0	0	0	0	0	0	FALSE
9551	ATP5MF	0	0	0	0	0	0	0	0	0	0	0	0	0	0	0	0	0	0	FALSE
10632	ATP5MG	0	0	0	0	0	0	0	0	0	0	0	0	0	0	0	0	0	0	FALSE
9556	ATP5MPL	0	0	0	0	0	0	0	0	0	0	0	0	0	0	0	0	0	0	FALSE
515	ATP5PB	0	0	0	0	0	0	0	0	0	0	0	0	0	0	0	0	0	0	FALSE
10476	ATP5PD	0	0	0	0	0	0	0	0	0	0	0	0	0	0	0	0	0	0	FALSE
522	ATP5PF	0	0	0	0	0	0	0	0	0	0	0	0	0	0	0	0	0	0	FALSE
539	ATP5PO	0	0	0	0	0	0	0	0	0	0	0	0	0	0	0	0	0	0	FALSE
27109	DMAC2L	0	0	0	0	0	0	0	0	0	0	0	0	0	0	0	0	0	0	FALSE
537	ATP6AP1	0	0	1	0	0	0	1	0	0	1	0	0	0	0	0	0	0	3	FALSE
92270	ATP6AP1L	0	0	0	0	0	0	0	0	0	0	0	0	0	0	0	0	0	0	FALSE
10159	ATP6AP2	0	0	0	0	0	0	0	0	0	0	0	0	0	0	0	0	0	0	FALSE
535	ATP6V0A1	0	0	0	0	0	0	0	0	0	0	0	0	0	0	0	0	0	0	FALSE
23545	ATP6V0A2	0	0	0	0	0	0	0	0	0	0	0	0	0	0	0	0	0	0	FALSE
50617	ATP6V0A4	0	0	0	0	0	0	0	0	0	0	0	0	0	0	0	0	0	0	FALSE
533	ATP6V0B	0	0	0	0	0	0	0	0	0	0	0	0	0	0	0	0	0	0	FALSE
527	ATP6V0C	1	1	1	1	1	1	1	1	1	1	1	1	1	1	1	0	1	16	TRUE
9114	ATP6V0D1	0	1	1	0	0	1	1	1	0	1	0	1	0	1	0	0	0	8	FALSE
245972	ATP6V0D2	0	0	0	0	0	0	0	0	0	0	0	0	0	0	0	0	0	0	FALSE
8992	ATP6V0E1	0	0	0	0	0	0	0	0	0	0	0	0	0	0	0	0	0	0	FALSE
155066	ATP6V0E2	0	0	0	0	0	0	0	0	0	0	0	0	0	0	0	0	0	0	FALSE
523	ATP6V1A	0	0	0	0	0	0	0	0	0	1	0	0	0	0	0	0	0	1	FALSE
525	ATP6V1B1	0	0	0	0	0	0	0	0	0	0	0	0	0	0	0	0	0	0	FALSE
526	ATP6V1B2	0	0	0	1	0	0	0	0	0	1	0	0	1	0	0	0	0	3	FALSE
528	ATP6V1C1	0	0	0	0	0	0	0	0	0	0	0	0	0	0	0	0	0	0	FALSE
245973	ATP6V1C2	0	0	0	0	0	0	0	0	0	0	0	0	0	0	0	0	0	0	FALSE
51382	ATP6V1D	0	0	0	0	0	0	0	0	0	0	0	0	0	0	0	0	0	0	FALSE
9296	ATP6V1F	0	0	0	0	0	0	0	0	0	0	0	0	0	0	0	0	0	0	FALSE
534	ATP6V1G2	0	0	0	0	0	0	0	0	0	0	0	0	0	0	0	0	0	0	FALSE
127124	ATP6V1G3	0	0	0	0	0	0	0	0	0	0	0	0	0	0	0	0	0	0	FALSE
51606	ATP6V1H	0	0	0	0	0	0	0	0	0	0	0	0	0	0	0	0	0	0	FALSE
538	ATP7A	0	0	0	0	0	0	0	0	0	0	0	0	0	0	0	0	0	0	FALSE
540	ATP7B	0	0	0	0	0	0	0	0	0	0	0	0	0	0	0	0	0	0	FALSE
10396	ATP8A1	0	0	0	0	0	0	0	0	0	0	0	0	0	0	0	0	0	0	FALSE
51761	ATP8A2	0	0	0	0	0	0	0	0	0	0	0	0	0	0	0	0	0	0	FALSE
5205	ATP8B1	0	0	0	0	0	0	0	0	0	0	0	0	0	0	0	0	0	0	FALSE
57198	ATP8B2	0	0	0	0	0	0	0	0	0	0	0	0	0	0	0	0	0	0	FALSE
148229	ATP8B3	0	0	0	0	0	0	0	0	0	0	0	0	0	0	0	0	0	0	FALSE
79895	ATP8B4	0	0	0	0	0	0	0	0	0	0	0	0	0	0	0	0	0	0	FALSE
10079	ATP9A	0	0	0	0	0	0	0	0	0	0	0	0	0	0	0	0	0	0	FALSE
374868	ATP9B	0	0	0	0	0	0	0	0	0	0	0	0	0	0	0	0	0	0	FALSE
64756	ATPAF1	0	0	0	0	0	0	0	0	0	0	0	0	0	0	0	0	0	0	FALSE
91647	ATPAF2	0	0	0	0	0	0	0	0	0	0	0	0	0	0	0	0	0	0	FALSE
545	ATR	0	0	0	0	0	0	0	0	0	1	0	0	0	0	0	0	0	1	FALSE
51374	ATRAID	0	0	0	0	0	0	0	0	0	0	0	0	0	0	0	0	0	0	FALSE
84126	ATRIP	0	0	0	0	0	0	0	0	0	0	0	0	0	0	0	0	0	0	FALSE
8455	ATRN	0	0	0	0	0	0	0	0	0	0	0	0	0	0	0	0	0	0	FALSE
26033	ATRNL1	0	0	0	0	0	0	0	0	0	0	0	0	0	0	0	0	0	0	FALSE
546	ATRX	0	0	0	0	0	0	0	0	0	0	0	0	0	0	0	0	0	0	FALSE
6310	ATXN1	0	0	0	0	0	0	0	0	0	0	0	0	0	0	0	0	0	0	FALSE
25814	ATXN10	0	0	0	0	0	0	0	0	0	0	0	0	0	0	0	0	0	0	FALSE
6311	ATXN2	0	0	0	0	0	0	0	0	0	0	0	0	0	0	0	0	0	0	FALSE
11273	ATXN2L	0	0	0	0	0	0	0	0	0	0	0	0	0	0	0	0	0	0	FALSE
4287	ATXN3	0	0	0	0	0	0	0	0	0	0	0	0	0	0	0	0	0	0	FALSE
6314	ATXN7	0	0	0	0	0	0	0	0	0	0	0	0	0	0	0	0	0	0	FALSE
222255	ATXN7L1	0	0	0	0	0	0	0	0	0	0	0	0	0	0	0	0	0	0	FALSE
127002	ATXN7L2	0	0	0	0	0	0	0	0	0	0	0	0	0	0	0	0	0	0	FALSE
549	AUH	0	0	0	0	0	0	0	0	0	0	0	0	0	0	0	0	0	0	FALSE
550	AUP1	0	0	0	0	0	0	0	0	0	0	0	0	0	0	0	0	0	0	FALSE
6790	AURKA	0	0	0	0	0	0	0	0	0	0	0	0	0	0	0	0	0	0	FALSE
54998	AURKAIP1	0	0	0	0	0	0	0	0	0	0	0	0	0	0	0	0	0	0	FALSE
9212	AURKB	0	0	0	0	0	0	0	1	0	0	0	0	0	0	0	0	0	1	FALSE
6795	AURKC	0	0	0	0	0	0	0	0	0	0	0	0	0	0	0	0	0	0	FALSE
26053	AUTS2	0	0	0	0	0	0	0	0	0	0	0	0	0	0	0	0	0	0	FALSE
57099	AVEN	0	0	0	0	0	0	0	0	0	0	0	0	0	0	0	0	0	0	FALSE
10677	AVIL	0	0	0	0	0	0	0	0	0	0	0	0	0	0	0	0	0	0	FALSE
23080	AVL9	0	0	0	0	0	0	0	0	0	0	0	0	0	0	0	0	0	0	FALSE
551	AVP	0	0	0	0	0	0	0	0	0	0	0	0	0	0	0	0	0	0	FALSE
60370	AVPI1	0	0	0	0	0	0	0	0	0	0	0	0	0	0	0	0	0	0	FALSE
552	AVPR1A	0	0	0	0	0	0	0	0	0	0	0	0	0	0	0	0	0	0	FALSE
553	AVPR1B	0	0	0	0	0	0	0	0	0	0	0	0	0	0	0	0	0	0	FALSE
554	AVPR2	0	0	0	0	0	0	0	0	0	0	0	0	0	0	0	0	0	0	FALSE
158833	AWAT1	0	0	0	0	0	0	0	0	0	0	0	0	0	0	0	0	0	0	FALSE
158835	AWAT2	0	0	0	0	0	0	0	0	0	0	0	0	0	0	0	0	0	0	FALSE
126859	AXDND1	0	0	0	0	0	0	0	0	0	0	0	0	0	0	0	0	0	0	FALSE
8312	AXIN1	0	0	0	0	0	0	0	0	0	0	0	0	0	0	0	0	0	0	FALSE
8313	AXIN2	0	0	0	0	0	0	0	0	0	0	0	0	0	0	0	0	0	0	FALSE
558	AXL	0	0	0	0	0	0	0	0	0	0	0	0	0	0	0	0	0	0	FALSE
563	AZGP1	0	0	0	0	0	0	0	0	0	0	0	0	0	0	0	0	0	0	FALSE
64343	AZI2	0	0	0	0	0	0	0	0	0	0	0	0	0	0	0	0	0	0	FALSE
51582	AZIN1	0	0	0	0	0	0	0	0	0	0	0	0	0	0	0	0	0	0	FALSE
113451	AZIN2	0	0	0	0	0	0	0	0	0	0	0	0	0	0	0	0	0	0	FALSE
566	AZU1	0	0	0	0	0	0	0	0	0	0	0	0	0	0	0	0	0	0	FALSE
567	B2M	0	0	0	0	0	0	0	0	0	0	0	0	0	0	0	0	0	0	FALSE
8706	B3GALNT1	0	0	0	0	0	0	0	0	0	0	0	0	0	0	0	0	0	0	FALSE
148789	B3GALNT2	0	0	0	0	0	0	0	0	0	0	0	0	0	0	0	0	0	0	FALSE
8708	B3GALT1	0	0	0	0	0	0	0	0	0	0	0	0	0	0	0	0	0	0	FALSE
8707	B3GALT2	0	0	0	0	0	0	0	0	0	0	0	0	0	0	0	0	0	0	FALSE
8705	B3GALT4	0	0	0	0	0	0	0	0	0	0	0	0	0	0	0	0	0	0	FALSE
10317	B3GALT5	0	0	0	0	0	0	0	0	0	0	0	0	0	0	0	0	0	0	FALSE
126792	B3GALT6	0	0	0	0	0	0	0	0	0	0	0	0	0	0	0	0	0	0	FALSE
27087	B3GAT1	0	0	0	0	0	0	0	0	0	0	0	0	0	0	0	0	0	0	FALSE
135152	B3GAT2	0	0	0	0	0	0	0	0	0	0	0	0	0	0	0	0	0	0	FALSE
26229	B3GAT3	0	0	0	0	0	0	0	0	0	0	0	0	0	0	0	0	0	0	FALSE
145173	B3GLCT	0	0	0	0	0	0	0	0	0	0	0	0	0	0	0	0	0	0	FALSE
10678	B3GNT2	0	0	0	0	0	0	0	0	0	0	0	0	0	0	0	0	0	0	FALSE
10331	B3GNT3	0	0	0	0	0	0	0	0	0	0	0	0	0	0	0	0	0	0	FALSE
79369	B3GNT4	0	0	0	0	0	0	0	0	0	0	0	0	0	0	0	0	0	0	FALSE
84002	B3GNT5	0	0	0	0	0	0	0	0	0	0	0	0	0	0	0	0	0	0	FALSE
192134	B3GNT6	0	0	0	0	0	0	0	0	0	0	0	0	0	0	0	0	0	0	FALSE
374907	B3GNT8	0	0	0	0	0	0	0	0	0	0	0	0	0	0	0	0	0	0	FALSE
146712	B3GNTL1	0	0	0	0	0	0	0	0	0	0	0	0	0	0	0	0	0	0	FALSE
2583	B4GALNT1	0	0	0	0	0	0	0	0	0	0	0	0	0	0	0	0	0	0	FALSE
124872	B4GALNT2	0	0	0	0	0	0	0	0	0	0	0	0	0	0	0	0	0	0	FALSE
283358	B4GALNT3	0	0	0	0	0	0	0	0	0	0	0	0	0	0	0	0	0	0	FALSE
338707	B4GALNT4	0	0	0	0	0	0	0	0	0	0	0	0	0	0	0	0	0	0	FALSE
2683	B4GALT1	0	0	0	0	0	0	0	0	0	0	0	0	0	0	0	0	0	0	FALSE
8704	B4GALT2	0	0	0	0	0	0	0	0	0	0	0	0	0	0	0	0	0	0	FALSE
8703	B4GALT3	0	0	0	0	0	0	0	0	0	0	0	0	0	0	0	0	0	0	FALSE
8702	B4GALT4	0	0	0	0	0	0	0	0	0	0	0	0	0	0	0	0	0	0	FALSE
9334	B4GALT5	0	0	0	0	0	0	0	0	0	0	0	0	0	0	0	0	0	0	FALSE
11285	B4GALT7	0	0	0	0	0	0	0	0	0	0	0	0	0	0	0	0	0	0	FALSE
27077	B9D1	0	0	0	0	0	0	0	0	0	0	0	0	0	0	0	0	0	0	FALSE
79870	BAALC	0	0	0	0	0	0	0	0	0	0	0	0	0	0	0	0	0	0	FALSE
570	BAAT	0	0	0	0	0	0	0	0	0	0	0	0	0	0	0	0	0	0	FALSE
9577	BABAM2	0	0	0	0	0	0	0	0	0	0	0	0	0	0	0	0	0	0	FALSE
23621	BACE1	0	0	0	0	0	0	0	0	0	0	0	0	0	0	0	0	0	0	FALSE
25825	BACE2	0	0	0	0	0	0	0	0	0	0	0	0	0	0	0	0	0	0	FALSE
571	BACH1	0	0	0	0	0	0	0	0	0	0	0	0	0	0	0	0	0	0	FALSE
60468	BACH2	0	0	0	0	0	0	0	0	0	0	0	0	0	0	0	0	0	0	FALSE
572	BAD	0	0	0	0	0	0	0	0	0	0	0	0	0	0	0	0	0	0	FALSE
573	BAG1	0	0	0	0	0	0	0	0	0	0	0	0	0	0	0	0	0	0	FALSE
9532	BAG2	0	0	0	0	0	0	0	0	0	0	0	0	0	0	0	0	0	0	FALSE
9531	BAG3	0	0	0	0	0	0	0	0	0	0	0	0	0	0	0	0	0	0	FALSE
9530	BAG4	0	0	0	0	0	0	0	0	0	0	0	0	0	0	0	0	0	0	FALSE
9529	BAG5	0	0	0	0	0	0	0	0	0	0	0	0	0	0	0	0	0	0	FALSE
7917	BAG6	0	0	0	0	0	0	0	0	0	0	0	0	0	0	0	0	0	0	FALSE
22893	BAHD1	0	0	0	0	0	0	0	0	0	0	0	0	0	0	0	0	0	0	FALSE
10458	BAIAP2	0	0	0	0	0	0	0	0	0	0	0	0	0	0	0	0	0	0	FALSE
55971	BAIAP2L1	0	0	0	0	0	0	0	0	0	0	0	0	0	0	0	0	0	0	FALSE
80115	BAIAP2L2	0	0	0	0	0	0	0	0	0	0	0	0	0	0	0	0	0	0	FALSE
8938	BAIAP3	0	0	0	0	0	0	0	0	0	0	0	0	0	0	0	0	0	0	FALSE
578	BAK1	0	0	0	0	0	0	0	0	0	0	0	0	0	0	0	0	0	0	FALSE
25805	BAMBI	0	0	0	0	0	0	0	0	0	0	0	0	0	0	0	0	0	0	FALSE
8815	BANF1	0	1	0	0	0	0	0	0	0	1	0	0	0	0	0	0	0	2	FALSE
140836	BANF2	0	0	0	0	0	0	0	0	0	0	0	0	0	0	0	0	0	0	FALSE
55024	BANK1	0	0	0	0	0	0	0	0	0	0	0	0	0	0	0	0	0	0	FALSE
8314	BAP1	0	0	0	0	0	0	0	0	0	0	0	0	0	0	0	0	0	0	FALSE
580	BARD1	0	0	0	0	0	0	0	0	0	0	0	0	0	0	0	0	0	0	FALSE
343472	BARHL2	0	0	0	0	0	0	0	0	0	0	0	0	0	0	0	0	0	0	FALSE
56033	BARX1	0	0	0	0	0	0	0	0	0	0	0	0	0	0	0	0	0	0	FALSE
8538	BARX2	0	0	0	0	0	0	0	0	0	0	0	0	0	0	0	0	0	0	FALSE
10409	BASP1	0	0	0	0	0	0	0	0	0	0	0	0	0	0	0	0	0	0	FALSE
10538	BATF	0	0	0	0	0	0	0	0	0	0	0	0	0	0	0	0	0	0	FALSE
116071	BATF2	0	0	0	0	0	0	0	0	0	0	0	0	0	0	0	0	0	0	FALSE
55509	BATF3	0	0	0	0	0	0	0	0	0	0	0	0	0	0	0	0	0	0	FALSE
581	BAX	0	0	0	0	0	0	0	0	0	0	0	0	0	0	0	0	0	0	FALSE
11177	BAZ1A	0	0	0	0	0	0	0	0	0	0	0	0	0	0	0	0	0	0	FALSE
9031	BAZ1B	0	0	0	0	0	0	0	0	0	0	0	0	0	0	0	0	0	0	FALSE
11176	BAZ2A	0	0	0	0	0	0	0	0	0	0	0	0	0	0	0	0	0	0	FALSE
29994	BAZ2B	0	0	0	0	0	0	0	0	0	0	0	0	0	0	0	0	0	0	FALSE
27113	BBC3	0	0	0	0	0	0	0	0	0	0	0	0	0	0	0	0	0	0	FALSE
8424	BBOX1	0	0	0	0	0	0	0	0	0	0	0	0	0	0	0	0	0	0	FALSE
582	BBS1	0	0	0	0	0	0	0	0	0	0	0	0	0	0	0	0	0	0	FALSE
583	BBS2	0	0	0	0	0	0	0	0	0	0	0	0	0	0	0	0	0	0	FALSE
585	BBS4	0	0	0	0	0	0	0	0	0	0	0	0	0	0	0	0	0	0	FALSE
129880	BBS5	0	0	0	0	0	0	0	0	0	0	0	0	0	0	0	0	0	0	FALSE
55212	BBS7	0	0	0	0	0	0	0	0	0	0	0	0	0	0	0	0	0	0	FALSE
27241	BBS9	0	0	0	0	0	0	0	0	0	0	0	0	0	0	0	0	0	0	FALSE
56987	BBX	0	0	0	0	0	0	0	0	0	0	0	0	0	0	0	0	0	0	FALSE
4059	BCAM	0	0	0	0	0	0	0	0	0	0	0	0	0	0	0	0	0	0	FALSE
63827	BCAN	0	0	0	0	0	0	0	0	0	0	0	0	0	0	0	0	0	0	FALSE
55973	BCAP29	0	0	0	0	0	0	0	0	0	0	0	0	0	0	0	0	0	0	FALSE
9564	BCAR1	0	0	0	0	0	0	0	0	0	0	0	0	0	0	0	0	0	0	FALSE
8412	BCAR3	0	0	0	0	0	0	0	0	0	0	0	0	0	0	0	0	0	0	FALSE
8537	BCAS1	0	0	0	0	0	0	0	0	0	0	0	0	0	0	0	0	0	0	FALSE
10286	BCAS2	0	0	0	0	0	0	0	0	0	0	0	0	0	0	0	0	0	0	FALSE
54828	BCAS3	0	0	0	0	0	0	0	0	0	0	0	0	0	0	0	0	0	0	FALSE
55653	BCAS4	0	0	0	0	0	0	0	0	0	0	0	0	0	0	0	0	0	0	FALSE
586	BCAT1	0	0	0	0	0	0	0	0	0	0	0	0	0	0	0	0	0	0	FALSE
587	BCAT2	0	0	0	0	0	0	0	0	0	0	0	0	0	0	0	0	0	0	FALSE
56647	BCCIP	0	0	0	0	0	0	0	0	0	0	0	0	0	0	0	0	0	0	FALSE
144233	BCDIN3D	0	0	0	0	0	0	0	0	0	0	0	0	0	0	0	0	0	0	FALSE
590	BCHE	0	0	0	0	0	0	0	0	0	0	0	0	0	0	0	0	0	0	FALSE
593	BCKDHA	0	0	0	0	0	0	0	0	0	0	0	0	0	0	0	0	0	0	FALSE
594	BCKDHB	0	0	0	0	0	0	0	0	0	0	0	0	0	0	0	0	0	0	FALSE
10295	BCKDK	0	0	0	0	0	0	0	0	0	0	0	0	0	0	0	0	0	0	FALSE
8915	BCL10	0	0	0	0	0	0	0	0	0	0	0	0	0	0	0	0	0	0	FALSE
53335	BCL11A	0	0	0	0	0	0	0	0	0	0	0	0	0	0	0	0	0	0	FALSE
64919	BCL11B	0	0	0	0	0	0	0	0	0	0	0	0	0	0	0	0	0	0	FALSE
596	BCL2	0	0	0	0	0	0	0	0	0	0	0	0	0	0	0	0	0	0	FALSE
597	BCL2A1	0	0	0	0	0	0	0	0	0	0	0	0	0	0	0	0	0	0	FALSE
598	BCL2L1	0	0	0	0	0	0	0	0	0	0	0	0	0	0	0	0	0	0	FALSE
10017	BCL2L10	0	0	0	0	0	0	0	0	0	0	0	0	0	0	0	0	0	0	FALSE
10018	BCL2L11	0	0	0	0	0	0	0	0	0	0	0	0	0	0	0	0	0	0	FALSE
83596	BCL2L12	0	0	0	0	0	0	0	0	0	0	0	0	0	0	0	0	0	0	FALSE
23786	BCL2L13	0	0	0	0	0	0	0	0	0	0	0	0	0	0	0	0	0	0	FALSE
79370	BCL2L14	0	0	0	0	0	0	0	0	0	0	0	0	0	0	0	0	0	0	FALSE
599	BCL2L2	0	0	0	0	0	0	0	0	0	0	0	0	0	0	0	0	0	0	FALSE
602	BCL3	0	0	0	0	0	0	0	0	0	0	0	0	0	0	0	0	0	0	FALSE
604	BCL6	0	0	0	0	0	0	0	0	0	0	0	0	0	0	0	0	0	0	FALSE
255877	BCL6B	0	0	0	0	0	0	0	0	0	0	0	0	0	0	0	0	0	0	FALSE
605	BCL7A	0	0	0	0	0	0	0	0	0	0	0	0	0	0	0	0	0	0	FALSE
9275	BCL7B	0	0	0	0	0	0	0	0	0	0	0	0	0	0	0	0	0	0	FALSE
9274	BCL7C	0	0	0	0	0	0	0	0	0	0	0	0	0	0	0	0	0	0	FALSE
607	BCL9	0	0	0	0	0	0	0	0	0	0	0	0	0	0	0	0	0	0	FALSE
283149	BCL9L	0	0	0	0	0	0	0	0	0	0	0	0	0	0	0	0	0	0	FALSE
9774	BCLAF1	0	0	0	0	0	0	0	0	0	0	0	0	0	0	0	0	0	0	FALSE
256643	BCLAF3	0	0	0	0	0	0	0	0	0	0	0	0	0	0	0	0	0	0	FALSE
53630	BCO1	0	0	0	0	0	0	0	0	0	0	0	0	0	0	0	0	0	0	FALSE
83875	BCO2	0	0	0	0	0	0	0	0	0	0	0	0	0	0	0	0	0	0	FALSE
54880	BCOR	0	0	0	0	0	0	0	0	0	0	0	0	0	0	0	0	0	0	FALSE
63035	BCORL1	0	0	0	0	0	0	0	0	0	0	0	0	0	0	0	0	0	0	FALSE
613	BCR	0	0	0	0	0	0	0	0	0	0	0	0	0	0	0	0	0	0	FALSE
617	BCS1L	0	0	0	0	0	0	0	0	0	0	0	0	0	0	0	0	0	0	FALSE
622	BDH1	0	0	0	0	0	0	0	0	0	0	0	0	0	0	0	0	0	0	FALSE
56898	BDH2	0	0	0	0	0	0	0	0	0	0	0	0	0	0	0	0	0	0	FALSE
623	BDKRB1	0	0	0	0	0	0	0	0	0	0	0	0	0	0	0	0	0	0	FALSE
624	BDKRB2	0	0	0	0	0	0	0	0	0	0	0	0	0	0	0	0	0	0	FALSE
627	BDNF	0	0	0	0	0	0	0	0	0	0	0	0	0	0	0	0	0	0	FALSE
55814	BDP1	0	0	0	0	0	0	0	0	0	0	0	0	0	0	0	0	0	0	FALSE
8678	BECN1	0	0	0	0	0	0	0	0	0	0	0	0	0	0	0	0	0	0	FALSE
57596	BEGAIN	0	0	0	0	0	0	0	0	0	0	0	0	0	0	0	0	0	0	FALSE
139105	BEND2	0	0	0	0	0	0	0	0	0	0	0	0	0	0	0	0	0	0	FALSE
79656	BEND5	0	0	0	0	0	0	0	0	0	0	0	0	0	0	0	0	0	0	FALSE
221336	BEND6	0	0	0	0	0	0	0	0	0	0	0	0	0	0	0	0	0	0	FALSE
7439	BEST1	0	0	0	0	0	0	0	0	0	0	0	0	0	0	0	0	0	0	FALSE
54831	BEST2	0	0	0	0	0	0	0	0	0	0	0	0	0	0	0	0	0	0	FALSE
144453	BEST3	0	0	0	0	0	0	0	0	0	0	0	0	0	0	0	0	0	0	FALSE
266675	BEST4	0	0	0	0	0	0	0	0	0	0	0	0	0	0	0	0	0	0	FALSE
10282	BET1	0	0	0	0	0	0	0	0	0	0	0	0	0	0	0	0	0	0	FALSE
55859	BEX1	0	0	0	0	0	0	0	0	0	0	0	0	0	0	0	0	0	0	FALSE
84707	BEX2	0	0	0	0	0	0	0	0	0	0	0	0	0	0	0	0	0	0	FALSE
27018	BEX3	0	0	0	0	0	0	0	0	0	0	0	0	0	0	0	0	0	0	FALSE
340542	BEX5	0	0	0	0	0	0	0	0	0	0	0	0	0	0	0	0	0	0	FALSE
51283	BFAR	0	0	0	0	0	0	0	0	0	0	0	0	0	0	0	0	0	0	FALSE
631	BFSP1	0	0	0	0	0	0	0	0	0	0	0	0	0	0	0	0	0	0	FALSE
8419	BFSP2	0	0	0	0	0	0	0	0	0	0	0	0	0	0	0	0	0	0	FALSE
632	BGLAP	0	0	0	0	0	0	0	0	0	0	0	0	0	0	0	0	0	0	FALSE
633	BGN	0	0	0	0	0	0	0	0	0	0	0	0	0	0	0	0	0	0	FALSE
168620	BHLHA15	0	0	0	0	0	0	0	0	0	0	0	0	0	0	0	0	0	0	FALSE
80823	BHLHB9	0	0	0	0	0	0	0	0	0	0	0	0	0	0	0	0	0	0	FALSE
27319	BHLHE22	0	0	0	0	0	0	0	0	0	0	0	0	0	0	0	0	0	0	FALSE
128408	BHLHE23	0	0	0	0	0	0	0	0	0	0	0	0	0	0	0	0	0	0	FALSE
8553	BHLHE40	0	0	0	0	0	0	0	0	0	0	0	0	0	0	0	0	0	0	FALSE
79365	BHLHE41	0	0	0	0	0	0	0	0	0	0	0	0	0	0	0	0	0	0	FALSE
635	BHMT	0	0	0	0	0	0	0	0	0	0	0	0	0	0	0	0	0	0	FALSE
23743	BHMT2	0	0	0	0	0	0	0	0	0	0	0	0	0	0	0	0	0	0	FALSE
80114	BICC1	0	0	0	0	0	0	0	0	0	0	0	0	0	0	0	0	0	0	FALSE
636	BICD1	0	0	0	0	0	0	0	0	0	0	0	0	0	0	0	0	0	0	FALSE
23299	BICD2	0	0	0	0	0	0	0	0	0	0	0	0	0	0	0	0	0	0	FALSE
92558	BICDL1	0	0	0	0	0	0	0	0	0	0	0	0	0	0	0	0	0	0	FALSE
29998	BICRA	0	0	0	0	0	0	0	0	0	0	0	0	0	0	0	0	0	0	FALSE
637	BID	0	0	0	0	0	0	0	0	0	0	0	0	0	0	0	0	0	0	FALSE
638	BIK	0	0	0	0	0	0	0	0	0	0	0	0	0	0	0	0	0	0	FALSE
274	BIN1	0	0	0	0	0	0	0	0	0	0	0	0	0	0	0	0	0	0	FALSE
51411	BIN2	0	0	0	0	0	0	0	0	0	0	0	0	0	0	0	0	0	0	FALSE
55909	BIN3	0	0	0	0	0	0	0	0	0	0	0	0	0	0	0	0	0	0	FALSE
329	BIRC2	0	0	0	0	0	0	0	0	0	0	0	0	0	0	0	0	0	0	FALSE
330	BIRC3	0	0	0	0	0	0	0	0	0	0	0	0	0	0	0	0	0	0	FALSE
332	BIRC5	0	1	1	1	0	0	0	1	0	1	1	1	1	1	0	1	0	10	FALSE
57448	BIRC6	0	0	0	0	0	0	0	0	0	0	0	0	0	0	0	0	0	0	FALSE
79444	BIRC7	0	0	0	0	0	0	0	0	0	0	0	0	0	0	0	0	0	0	FALSE
112401	BIRC8	0	0	0	0	0	0	0	0	0	0	0	0	0	0	0	0	0	0	FALSE
54841	BIVM	0	0	0	0	0	0	0	0	0	0	0	0	0	0	0	0	0	0	FALSE
10904	BLCAP	0	0	0	0	0	0	0	0	0	0	0	0	0	0	0	0	0	0	FALSE
640	BLK	0	0	0	0	0	0	0	0	0	0	0	0	0	0	0	0	0	0	FALSE
641	BLM	0	0	0	0	0	0	0	0	0	0	0	0	0	0	0	0	0	0	FALSE
642	BLMH	0	0	0	0	0	0	0	0	0	0	0	0	0	0	0	0	0	0	FALSE
29760	BLNK	0	0	0	0	0	0	0	0	0	0	0	0	0	0	0	0	0	0	FALSE
2647	BLOC1S1	0	0	0	0	0	0	0	0	0	0	0	0	0	0	0	0	0	0	FALSE
282991	BLOC1S2	0	0	0	0	0	0	0	0	0	0	0	0	0	0	0	0	0	0	FALSE
55330	BLOC1S4	0	0	0	0	0	0	0	0	0	0	0	0	0	0	0	0	0	0	FALSE
63915	BLOC1S5	0	0	0	0	0	0	0	0	0	0	0	0	0	0	0	0	0	0	FALSE
26258	BLOC1S6	0	0	0	0	0	0	0	0	0	0	0	0	0	0	0	0	0	0	FALSE
644	BLVRA	0	0	0	0	0	0	0	0	0	0	0	0	0	0	0	0	0	0	FALSE
645	BLVRB	0	0	0	0	0	0	0	0	0	0	0	0	0	0	0	0	0	0	FALSE
8548	BLZF1	0	0	0	0	0	0	0	0	0	0	0	0	0	0	0	0	0	0	FALSE
90427	BMF	0	0	0	0	0	0	0	0	0	0	0	0	0	0	0	0	0	0	FALSE
648	BMI1	0	0	0	0	0	0	0	0	0	0	0	0	0	0	0	0	0	0	FALSE
649	BMP1	0	0	0	0	0	0	0	0	0	0	0	0	0	0	0	0	0	0	FALSE
27302	BMP10	0	0	0	0	0	0	0	0	0	0	0	0	0	0	0	0	0	0	FALSE
9210	BMP15	0	0	0	0	0	0	0	0	0	0	0	0	0	0	0	0	0	0	FALSE
650	BMP2	0	0	0	0	0	0	0	0	0	0	0	0	0	0	0	0	0	0	FALSE
55589	BMP2K	0	0	0	0	0	0	0	0	0	0	0	0	0	0	0	0	0	0	FALSE
651	BMP3	0	0	0	0	0	0	0	0	0	0	0	0	0	0	0	0	0	0	FALSE
652	BMP4	0	0	0	0	0	0	0	0	0	0	0	0	0	0	0	0	0	0	FALSE
653	BMP5	0	0	0	0	0	0	0	0	0	0	0	0	0	0	0	0	0	0	FALSE
654	BMP6	0	0	0	0	0	0	0	0	0	0	0	0	0	0	0	0	0	0	FALSE
353500	BMP8A	0	0	0	0	0	0	0	0	0	0	0	0	0	0	0	0	0	0	FALSE
656	BMP8B	0	0	0	0	0	0	0	0	0	0	0	0	0	0	0	0	0	0	FALSE
168667	BMPER	0	0	0	0	0	0	0	0	0	0	0	0	0	0	0	0	0	0	FALSE
657	BMPR1A	0	0	0	0	0	0	0	0	0	0	0	0	0	0	0	0	0	0	FALSE
658	BMPR1B	0	0	0	0	0	0	0	0	0	0	0	0	0	0	0	0	0	0	FALSE
659	BMPR2	0	0	0	0	0	0	0	0	0	0	0	0	0	0	0	0	0	0	FALSE
9790	BMS1	0	0	0	0	0	0	0	0	0	0	0	0	0	0	0	0	0	0	FALSE
154743	BMT2	0	0	0	0	0	0	0	0	0	0	0	0	0	0	0	0	0	0	FALSE
660	BMX	0	0	0	0	0	0	0	0	0	0	0	0	0	0	0	0	0	0	FALSE
646	BNC1	0	0	0	0	0	0	0	0	0	0	0	0	0	0	0	0	0	0	FALSE
54796	BNC2	0	0	0	0	0	0	0	0	0	0	0	0	0	0	0	0	0	0	FALSE
662	BNIP1	0	0	0	0	0	0	0	0	0	0	0	0	0	0	0	0	0	0	FALSE
663	BNIP2	0	0	0	0	0	0	0	0	0	0	0	0	0	0	0	0	0	0	FALSE
664	BNIP3	0	0	0	0	0	0	0	0	0	0	0	0	0	0	0	0	0	0	FALSE
149428	BNIPL	0	0	0	0	0	0	0	0	0	0	0	0	0	0	0	0	0	0	FALSE
91653	BOC	0	0	0	0	0	0	0	0	0	0	0	0	0	0	0	0	0	0	FALSE
666	BOK	0	0	0	0	0	0	0	0	0	0	0	0	0	0	0	0	0	0	FALSE
51027	BOLA1	0	0	0	0	0	0	0	0	0	0	0	0	0	0	0	0	0	0	FALSE
388962	BOLA3	0	0	0	0	0	0	0	0	0	0	0	0	0	0	0	0	0	0	FALSE
66037	BOLL	0	0	0	0	0	0	0	0	0	0	0	0	0	0	0	0	0	0	FALSE
23246	BOP1	1	1	1	1	1	1	1	1	1	1	1	1	1	1	0	0	1	15	TRUE
79866	BORA	0	0	0	0	0	0	0	0	0	0	0	0	0	0	0	0	0	0	FALSE
118426	BORCS5	0	0	0	0	0	0	0	0	0	0	0	0	0	0	0	0	0	0	FALSE
119032	BORCS7	0	0	0	0	0	0	0	0	0	0	0	0	0	0	0	0	0	0	FALSE
669	BPGM	0	0	0	0	0	0	0	0	0	0	0	0	0	0	0	0	0	0	FALSE
670	BPHL	0	0	0	0	0	0	0	0	0	0	0	0	0	0	0	0	0	0	FALSE
671	BPI	0	0	0	0	0	0	0	0	0	0	0	0	0	0	0	0	0	0	FALSE
51297	BPIFA1	0	0	0	0	0	0	0	0	0	0	0	0	0	0	0	0	0	0	FALSE
140683	BPIFA2	0	0	0	0	0	0	0	0	0	0	0	0	0	0	0	0	0	0	FALSE
128861	BPIFA3	0	0	0	0	0	0	0	0	0	0	0	0	0	0	0	0	0	0	FALSE
92747	BPIFB1	0	0	0	0	0	0	0	0	0	0	0	0	0	0	0	0	0	0	FALSE
359710	BPIFB3	0	0	0	0	0	0	0	0	0	0	0	0	0	0	0	0	0	0	FALSE
128859	BPIFB6	0	0	0	0	0	0	0	0	0	0	0	0	0	0	0	0	0	0	FALSE
254240	BPIFC	0	0	0	0	0	0	0	0	0	0	0	0	0	0	0	0	0	0	FALSE
10380	BPNT1	0	0	0	0	0	0	0	0	0	0	0	0	0	0	0	0	0	0	FALSE
2186	BPTF	0	0	0	0	0	0	0	0	0	0	0	0	0	0	0	0	0	0	FALSE
673	BRAF	0	0	0	0	0	0	0	0	0	0	0	0	0	0	0	0	0	0	FALSE
8315	BRAP	0	0	0	0	0	0	0	0	0	0	0	0	0	0	0	0	0	0	FALSE
672	BRCA1	0	0	0	0	0	0	0	0	0	0	0	0	0	0	0	0	0	0	FALSE
675	BRCA2	0	0	0	0	0	0	0	0	0	0	0	0	0	0	0	0	0	0	FALSE
79184	BRCC3	0	0	0	0	0	0	0	0	0	0	0	0	0	0	0	0	0	0	FALSE
23774	BRD1	0	0	0	0	0	0	0	0	0	0	0	0	0	0	0	0	0	0	FALSE
6046	BRD2	0	0	0	0	0	0	0	0	0	0	0	0	0	0	0	0	0	0	FALSE
8019	BRD3	0	0	0	0	0	0	0	0	0	0	0	0	0	0	0	0	0	0	FALSE
23476	BRD4	0	1	1	1	0	0	0	0	1	1	1	1	0	1	0	0	0	8	FALSE
29117	BRD7	0	0	0	0	0	0	0	0	0	0	0	0	0	0	0	0	0	0	FALSE
10902	BRD8	0	0	0	0	0	0	0	0	0	0	0	0	0	0	0	0	0	0	FALSE
65980	BRD9	0	0	0	0	0	0	0	0	0	0	0	0	0	0	0	0	0	0	FALSE
676	BRDT	0	0	0	0	0	0	0	0	0	0	0	0	0	0	0	0	0	0	FALSE
2972	BRF1	0	0	0	0	0	0	0	0	0	0	0	0	0	0	0	0	0	0	FALSE
55290	BRF2	0	0	0	0	0	0	0	0	0	0	0	0	0	0	0	0	0	0	FALSE
25798	BRI3	0	0	0	0	0	0	0	0	0	0	0	0	0	0	0	0	0	0	FALSE
57795	BRINP2	0	0	0	0	0	0	0	0	0	0	0	0	0	0	0	0	0	0	FALSE
339479	BRINP3	0	0	0	0	0	0	0	0	0	0	0	0	0	0	0	0	0	0	FALSE
83990	BRIP1	0	0	0	0	0	0	0	0	0	0	0	0	0	0	0	0	0	0	FALSE
55299	BRIX1	0	0	0	0	0	0	0	0	0	0	0	0	0	0	0	0	0	0	FALSE
55845	BRK1	0	0	0	0	0	0	0	0	0	0	0	0	0	0	0	0	0	0	FALSE
25855	BRMS1	0	0	0	0	0	0	0	0	0	0	0	0	0	0	0	0	0	0	FALSE
84312	BRMS1L	0	0	0	0	0	0	0	0	0	0	0	0	0	0	0	0	0	0	FALSE
148362	BROX	0	0	0	0	0	0	0	0	0	0	0	0	0	0	0	0	0	0	FALSE
7862	BRPF1	0	0	0	0	0	0	0	0	0	0	0	0	0	0	0	0	0	0	FALSE
27154	BRPF3	0	0	0	0	0	0	0	0	0	0	0	0	0	0	0	0	0	0	FALSE
680	BRS3	0	0	0	0	0	0	0	0	0	0	0	0	0	0	0	0	0	0	FALSE
84446	BRSK1	0	0	0	0	0	0	0	0	0	0	0	0	0	0	0	0	0	0	FALSE
9024	BRSK2	0	0	0	0	0	0	0	0	0	0	0	0	0	0	0	0	0	0	FALSE
54014	BRWD1	0	0	0	0	0	0	0	0	0	0	0	0	0	0	0	0	0	0	FALSE
254065	BRWD3	0	0	0	0	0	0	0	0	0	0	0	0	0	0	0	0	0	0	FALSE
26580	BSCL2	0	0	0	0	0	0	0	0	0	0	0	0	0	0	0	0	0	0	FALSE
55108	BSDC1	0	0	0	0	0	0	0	0	0	0	0	0	0	0	0	0	0	0	FALSE
682	BSG	0	0	0	0	0	0	0	0	0	0	0	0	0	0	0	0	0	0	FALSE
8927	BSN	0	0	0	0	0	0	0	0	0	0	0	0	0	0	0	0	0	0	FALSE
7809	BSND	0	0	0	0	0	0	0	0	0	0	0	0	0	0	0	0	0	0	FALSE
54836	BSPRY	0	0	0	0	0	0	0	0	0	0	0	0	0	0	0	0	0	0	FALSE
683	BST1	0	0	0	0	0	0	0	0	0	0	0	0	0	0	0	0	0	0	FALSE
684	BST2	0	0	0	0	0	0	0	0	0	0	0	0	0	0	0	0	0	0	FALSE
9044	BTAF1	0	0	0	0	0	0	0	0	0	0	0	0	0	0	0	0	0	0	FALSE
53339	BTBD1	0	0	0	0	0	0	0	0	0	0	0	0	0	0	0	0	0	0	FALSE
84280	BTBD10	0	0	0	0	0	0	0	0	0	0	0	0	0	0	0	0	0	0	FALSE
121551	BTBD11	0	0	0	0	0	0	0	0	0	0	0	0	0	0	0	0	0	0	FALSE
118663	BTBD16	0	0	0	0	0	0	0	0	0	0	0	0	0	0	0	0	0	0	FALSE
388419	BTBD17	0	0	0	0	0	0	0	0	0	0	0	0	0	0	0	0	0	0	FALSE
643376	BTBD18	0	0	0	0	0	0	0	0	0	0	0	0	0	0	0	0	0	0	FALSE
55643	BTBD2	0	0	0	0	0	0	0	0	0	0	0	0	0	0	0	0	0	0	FALSE
22903	BTBD3	0	0	0	0	0	0	0	0	0	0	0	0	0	0	0	0	0	0	FALSE
90135	BTBD6	0	0	0	0	0	0	0	0	0	0	0	0	0	0	0	0	0	0	FALSE
55727	BTBD7	0	0	0	0	0	0	0	0	0	0	0	0	0	0	0	0	0	0	FALSE
284697	BTBD8	0	0	0	0	0	0	0	0	0	0	0	0	0	0	0	0	0	0	FALSE
114781	BTBD9	0	0	0	0	0	0	0	0	0	0	0	0	0	0	0	0	0	0	FALSE
685	BTC	0	0	0	0	0	0	0	0	0	0	0	0	0	0	0	0	0	0	FALSE
686	BTD	0	0	0	0	0	0	0	0	0	0	0	0	0	0	0	0	0	0	FALSE
689	BTF3	0	0	1	1	0	0	1	0	1	1	0	1	0	1	1	0	0	8	FALSE
91408	BTF3L4	0	0	0	0	0	0	0	0	0	0	0	0	0	0	0	0	0	0	FALSE
694	BTG1	0	0	0	0	0	0	0	0	0	0	0	0	0	0	0	0	0	0	FALSE
7832	BTG2	0	0	0	0	0	0	0	0	0	0	0	0	0	0	0	0	0	0	FALSE
10950	BTG3	0	0	0	0	0	0	0	0	0	0	0	0	0	0	0	0	0	0	FALSE
54766	BTG4	0	0	0	0	0	0	0	0	0	0	0	0	0	0	0	0	0	0	FALSE
695	BTK	0	0	0	0	0	0	0	0	0	0	0	0	0	0	0	0	0	0	FALSE
151888	BTLA	0	0	0	0	0	0	0	0	0	0	0	0	0	0	0	0	0	0	FALSE
696	BTN1A1	0	0	0	0	0	0	0	0	0	0	0	0	0	0	0	0	0	0	FALSE
11120	BTN2A1	0	0	0	0	0	0	0	0	0	0	0	0	0	0	0	0	0	0	FALSE
10385	BTN2A2	0	0	0	0	0	0	0	0	0	0	0	0	0	0	0	0	0	0	FALSE
11119	BTN3A1	0	0	0	0	0	0	0	0	0	0	0	0	0	0	0	0	0	0	FALSE
11118	BTN3A2	0	0	0	0	0	0	0	0	0	0	0	0	0	0	0	0	0	0	FALSE
10384	BTN3A3	0	0	0	0	0	0	0	0	0	0	0	0	0	0	0	0	0	0	FALSE
10917	BTNL3	0	0	0	0	0	0	0	0	0	0	0	0	0	0	0	0	0	0	FALSE
79908	BTNL8	0	0	0	0	0	0	0	0	0	0	0	0	0	0	0	0	0	0	FALSE
153579	BTNL9	0	0	0	0	0	0	0	0	0	0	0	0	0	0	0	0	0	0	FALSE
8945	BTRC	0	0	0	0	0	0	0	0	0	0	0	0	0	0	0	0	0	0	FALSE
699	BUB1	0	0	0	0	0	0	0	0	0	0	0	0	0	0	0	0	0	0	FALSE
701	BUB1B	1	1	1	1	1	1	1	1	1	1	1	1	1	1	1	1	0	16	TRUE
9184	BUB3	0	0	1	0	0	0	0	0	0	1	0	0	0	0	1	0	0	3	FALSE
84811	BUD13	0	0	0	0	0	0	0	0	0	0	0	0	0	0	0	0	0	0	FALSE
114049	BUD23	0	0	0	0	0	0	0	0	0	0	0	0	0	0	0	0	0	0	FALSE
8896	BUD31	1	1	1	1	1	1	0	1	1	1	0	1	1	0	1	0	1	13	FALSE
11149	BVES	0	0	0	0	0	0	0	0	0	0	0	0	0	0	0	0	0	0	FALSE
705	BYSL	0	0	0	0	0	0	0	0	0	0	0	0	0	0	0	0	0	0	FALSE
9689	BZW1	0	0	0	0	0	0	0	0	0	0	0	0	0	0	0	0	0	0	FALSE
28969	BZW2	0	0	0	0	0	0	0	0	0	0	0	0	0	0	0	0	0	0	FALSE
387638	C10orf113	0	0	0	0	0	0	0	0	0	0	0	0	0	0	0	0	0	0	FALSE
399814	C10orf120	0	0	0	0	0	0	0	0	0	0	0	0	0	0	0	0	0	0	FALSE
282966	C10orf53	0	0	0	0	0	0	0	0	0	0	0	0	0	0	0	0	0	0	FALSE
118461	C10orf71	0	0	0	0	0	0	0	0	0	0	0	0	0	0	0	0	0	0	FALSE
387695	C10orf99	0	0	0	0	0	0	0	0	0	0	0	0	0	0	0	0	0	0	FALSE
56673	C11orf16	0	0	0	0	0	0	0	0	0	0	0	0	0	0	0	0	0	0	FALSE
53838	C11orf24	0	0	0	0	0	0	0	0	0	0	0	0	0	0	0	0	0	0	FALSE
143501	C11orf40	0	0	0	0	0	0	0	0	0	0	0	0	0	0	0	0	0	0	FALSE
160298	C11orf42	0	0	0	0	0	0	0	0	0	0	0	0	0	0	0	0	0	0	FALSE
219833	C11orf45	0	0	0	0	0	0	0	0	0	0	0	0	0	0	0	0	0	0	FALSE
79096	C11orf49	0	0	0	0	0	0	0	0	0	0	0	0	0	0	0	0	0	0	FALSE
10944	C11orf58	0	0	0	0	0	0	0	0	0	0	0	0	0	0	0	0	0	0	FALSE
54494	C11orf71	0	0	0	0	0	0	0	0	0	0	0	0	0	0	0	0	0	0	FALSE
119710	C11orf74	0	0	0	0	0	0	0	0	0	0	0	0	0	0	0	0	0	0	FALSE
79703	C11orf80	0	0	0	0	0	0	0	0	0	0	0	0	0	0	0	0	0	0	FALSE
60314	C12orf10	0	0	0	0	0	0	0	0	0	0	0	0	0	0	0	0	0	0	FALSE
57102	C12orf4	0	0	0	0	0	0	0	0	0	0	0	0	0	0	0	0	0	0	FALSE
283461	C12orf40	0	0	0	0	0	0	0	0	0	0	0	0	0	0	0	0	0	0	FALSE
64897	C12orf43	0	0	0	0	0	0	0	0	0	0	0	0	0	0	0	0	0	0	FALSE
121053	C12orf45	0	0	0	0	0	0	0	0	0	0	0	0	0	0	0	0	0	0	FALSE
79794	C12orf49	0	0	0	0	0	0	0	0	0	0	0	0	0	0	0	0	0	0	FALSE
121273	C12orf54	0	0	0	0	0	0	0	0	0	0	0	0	0	0	0	0	0	0	FALSE
144608	C12orf60	0	0	0	0	0	0	0	0	0	0	0	0	0	0	0	0	0	0	FALSE
144577	C12orf66	0	0	0	0	0	0	0	0	0	0	0	0	0	0	0	0	0	0	FALSE
55017	C14orf119	0	0	0	0	0	0	0	0	0	0	0	0	0	0	0	0	0	0	FALSE
122525	C14orf28	0	0	0	0	0	0	0	0	0	0	0	0	0	0	0	0	0	0	FALSE
317761	C14orf39	0	0	0	0	0	0	0	0	0	0	0	0	0	0	0	0	0	0	FALSE
60686	C14orf93	0	0	0	0	0	0	0	0	0	0	0	0	0	0	0	0	0	0	FALSE
56905	C15orf39	0	0	0	0	0	0	0	0	0	0	0	0	0	0	0	0	0	0	FALSE
84419	C15orf48	0	0	0	0	0	0	0	0	0	0	0	0	0	0	0	0	0	0	FALSE
145853	C15orf61	0	0	0	0	0	0	0	0	0	0	0	0	0	0	0	0	0	0	FALSE
145788	C15orf65	0	0	0	0	0	0	0	0	0	0	0	0	0	0	0	0	0	0	FALSE
89927	BMERB1	0	0	0	0	0	0	0	0	0	0	0	0	0	0	0	0	0	0	FALSE
123775	C16orf46	0	0	0	0	0	0	0	0	0	0	0	0	0	0	0	0	0	0	FALSE
64755	C16orf58	0	0	0	0	0	0	0	0	0	0	0	0	0	0	0	0	0	0	FALSE
146562	C16orf71	0	0	0	0	0	0	0	0	0	0	0	0	0	0	0	0	0	0	FALSE
123970	C16orf78	0	0	0	0	0	0	0	0	0	0	0	0	0	0	0	0	0	0	FALSE
388272	C16orf87	0	0	0	0	0	0	0	0	0	0	0	0	0	0	0	0	0	0	FALSE
146556	C16orf89	0	0	0	0	0	0	0	0	0	0	0	0	0	0	0	0	0	0	FALSE
339263	LINC02693	0	0	0	0	0	0	0	0	0	0	0	0	0	0	0	0	0	0	FALSE
284018	C17orf58	0	0	0	0	0	0	0	0	0	0	0	0	0	0	0	0	0	0	FALSE
124773	C17orf64	0	0	0	0	0	0	0	0	0	0	0	0	0	0	0	0	0	0	FALSE
64149	C17orf75	0	0	0	0	0	0	0	0	0	0	0	0	0	0	0	0	0	0	FALSE
284099	C17orf78	0	0	0	0	0	0	0	0	0	0	0	0	0	0	0	0	0	0	FALSE
55028	C17orf80	0	0	0	0	0	0	0	0	0	0	0	0	0	0	0	0	0	0	FALSE
100141515	C17orf99	0	0	0	0	0	0	0	0	0	0	0	0	0	0	0	0	0	0	FALSE
147339	C18orf25	0	0	0	0	0	0	0	0	0	0	0	0	0	0	0	0	0	0	FALSE
83636	C19orf12	0	0	0	0	0	0	0	0	0	0	0	0	0	0	0	0	0	0	FALSE
147685	C19orf18	0	0	0	0	0	0	0	0	0	0	0	0	0	0	0	0	0	0	FALSE
28974	C19orf53	0	0	0	0	0	0	0	0	0	0	0	0	0	0	0	0	0	0	FALSE
10438	C1D	0	0	0	0	0	0	0	0	0	0	0	0	0	0	0	0	0	0	FALSE
56913	C1GALT1	0	0	0	0	0	0	0	0	0	0	0	0	0	0	0	0	0	0	FALSE
29071	C1GALT1C1	0	0	0	0	0	0	0	0	0	0	0	0	0	0	0	0	0	0	FALSE
712	C1QA	0	0	0	0	0	0	0	0	0	0	0	0	0	0	0	0	0	0	FALSE
713	C1QB	0	0	0	0	0	0	0	0	0	0	0	0	0	0	0	0	0	0	FALSE
708	C1QBP	0	0	0	0	0	0	0	0	0	0	0	0	0	0	0	0	0	0	FALSE
714	C1QC	0	0	0	0	0	0	0	0	0	0	0	0	0	0	0	0	0	0	FALSE
10882	C1QL1	0	0	0	0	0	0	0	0	0	0	0	0	0	0	0	0	0	0	FALSE
165257	C1QL2	0	0	0	0	0	0	0	0	0	0	0	0	0	0	0	0	0	0	FALSE
389941	C1QL3	0	0	0	0	0	0	0	0	0	0	0	0	0	0	0	0	0	0	FALSE
338761	C1QL4	0	0	0	0	0	0	0	0	0	0	0	0	0	0	0	0	0	0	FALSE
114897	C1QTNF1	0	0	0	0	0	0	0	0	0	0	0	0	0	0	0	0	0	0	FALSE
388581	C1QTNF12	0	0	0	0	0	0	0	0	0	0	0	0	0	0	0	0	0	0	FALSE
114898	C1QTNF2	0	0	0	0	0	0	0	0	0	0	0	0	0	0	0	0	0	0	FALSE
114899	C1QTNF3	0	0	0	0	0	0	0	0	0	0	0	0	0	0	0	0	0	0	FALSE
114904	C1QTNF6	0	0	0	0	0	0	0	0	0	0	0	0	0	0	0	0	0	0	FALSE
114905	C1QTNF7	0	0	0	0	0	0	0	0	0	0	0	0	0	0	0	0	0	0	FALSE
390664	C1QTNF8	0	0	0	0	0	0	0	0	0	0	0	0	0	0	0	0	0	0	FALSE
338872	C1QTNF9	0	0	0	0	0	0	0	0	0	0	0	0	0	0	0	0	0	0	FALSE
387911	C1QTNF9B	0	0	0	0	0	0	0	0	0	0	0	0	0	0	0	0	0	0	FALSE
51279	C1RL	0	0	0	0	0	0	0	0	0	0	0	0	0	0	0	0	0	0	FALSE
716	C1S	0	0	0	0	0	0	0	0	0	0	0	0	0	0	0	0	0	0	FALSE
200159	C1orf100	0	0	0	0	0	0	0	0	0	0	0	0	0	0	0	0	0	0	FALSE
92346	C1orf105	0	0	0	0	0	0	0	0	0	0	0	0	0	0	0	0	0	0	FALSE
54955	C1orf109	0	0	1	1	0	0	0	1	0	0	0	0	1	0	0	0	0	4	FALSE
79762	C1orf115	0	0	0	0	0	0	0	0	0	0	0	0	0	0	0	0	0	0	FALSE
79098	C1orf116	0	0	0	0	0	0	0	0	0	0	0	0	0	0	0	0	0	0	FALSE
127687	C1orf122	0	0	0	0	0	0	0	0	0	0	0	0	0	0	0	0	0	0	FALSE
54987	CZIB	0	0	0	0	0	0	0	0	0	0	0	0	0	0	0	0	0	0	FALSE
128061	C1orf131	0	0	0	0	0	0	0	0	0	0	0	0	0	0	0	0	0	0	FALSE
400757	C1orf141	0	0	0	0	0	0	0	0	0	0	0	0	0	0	0	0	0	0	FALSE
388649	C1orf146	0	0	0	0	0	0	0	0	0	0	0	0	0	0	0	0	0	0	FALSE
93190	C1orf158	0	0	0	0	0	0	0	0	0	0	0	0	0	0	0	0	0	0	FALSE
54991	C1orf159	0	0	0	0	0	0	0	0	0	0	0	0	0	0	0	0	0	0	FALSE
128346	C1orf162	0	0	0	0	0	0	0	0	0	0	0	0	0	0	0	0	0	0	FALSE
339448	C1orf174	0	0	0	0	0	0	0	0	0	0	0	0	0	0	0	0	0	0	FALSE
84886	C1orf198	0	0	0	0	0	0	0	0	0	0	0	0	0	0	0	0	0	0	FALSE
81563	C1orf21	0	0	0	0	0	0	0	0	0	0	0	0	0	0	0	0	0	0	FALSE
79169	C1orf35	0	0	0	0	0	0	0	0	0	0	0	0	0	0	0	0	0	0	FALSE
25912	C1orf43	0	0	0	0	0	0	0	0	0	0	0	0	0	0	0	0	0	0	FALSE
388722	C1orf53	0	0	0	0	0	0	0	0	0	0	0	0	0	0	0	0	0	0	FALSE
79630	C1orf54	0	0	0	0	0	0	0	0	0	0	0	0	0	0	0	0	0	0	FALSE
54964	C1orf56	0	0	0	0	0	0	0	0	0	0	0	0	0	0	0	0	0	0	FALSE
148304	C1orf74	0	0	0	0	0	0	0	0	0	0	0	0	0	0	0	0	0	0	FALSE
127795	C1orf87	0	0	0	0	0	0	0	0	0	0	0	0	0	0	0	0	0	0	FALSE
717	C2	0	0	0	0	0	0	0	0	0	0	0	0	0	0	0	0	0	0	FALSE
140873	C20orf173	0	0	0	0	0	0	0	0	0	0	0	0	0	0	0	0	0	0	FALSE
400831	C20orf202	0	0	0	0	0	0	0	0	0	0	0	0	0	0	0	0	0	0	FALSE
128602	C20orf85	0	0	0	0	0	0	0	0	0	0	0	0	0	0	0	0	0	0	FALSE
54058	C21orf58	0	0	0	0	0	0	0	0	0	0	0	0	0	0	0	0	0	0	FALSE
56245	C21orf62	0	0	0	0	0	0	0	0	0	0	0	0	0	0	0	0	0	0	FALSE
54149	C21orf91	0	0	0	0	0	0	0	0	0	0	0	0	0	0	0	0	0	0	FALSE
84645	C22orf23	0	0	0	0	0	0	0	0	0	0	0	0	0	0	0	0	0	0	FALSE
25770	C22orf31	0	0	0	0	0	0	0	0	0	0	0	0	0	0	0	0	0	0	FALSE
79640	C22orf46	0	0	0	0	0	0	0	0	0	0	0	0	0	0	0	0	0	0	FALSE
25966	C2CD2	0	0	0	0	0	0	0	0	0	0	0	0	0	0	0	0	0	0	FALSE
9854	C2CD2L	0	0	0	0	0	0	0	0	0	0	0	0	0	0	0	0	0	0	FALSE
9847	C2CD5	0	0	0	0	0	0	0	0	0	0	0	0	0	0	0	0	0	0	FALSE
151254	C2CD6	0	0	0	0	0	0	0	0	0	0	0	0	0	0	0	0	0	0	FALSE
150590	C2orf15	0	0	0	0	0	0	0	0	0	0	0	0	0	0	0	0	0	0	FALSE
84226	C2orf16	0	0	0	0	0	0	0	0	0	0	0	0	0	0	0	0	0	0	FALSE
84417	ECRG4	0	0	0	0	0	0	0	0	0	0	0	0	0	0	0	0	0	0	FALSE
79074	C2orf49	0	0	0	0	0	0	0	0	0	0	0	0	0	0	0	0	0	0	FALSE
130813	C2orf50	0	0	0	0	0	0	0	0	0	0	0	0	0	0	0	0	0	0	FALSE
401027	C2orf66	0	0	0	0	0	0	0	0	0	0	0	0	0	0	0	0	0	0	FALSE
205327	C2orf69	0	0	0	0	0	0	0	0	0	0	0	0	0	0	0	0	0	0	FALSE
129852	C2orf73	0	0	0	0	0	0	0	0	0	0	0	0	0	0	0	0	0	0	FALSE
130355	C2orf76	0	0	0	0	0	0	0	0	0	0	0	0	0	0	0	0	0	0	FALSE
718	C3	0	0	0	0	0	0	0	0	0	0	0	0	0	0	0	0	0	0	FALSE
719	C3AR1	0	0	0	0	0	0	0	0	0	0	0	0	0	0	0	0	0	0	FALSE
152405	TEX55	0	0	0	0	0	0	0	0	0	0	0	0	0	0	0	0	0	0	FALSE
285315	C3orf33	0	0	0	0	0	0	0	0	0	0	0	0	0	0	0	0	0	0	FALSE
285237	C3orf38	0	0	0	0	0	0	0	0	0	0	0	0	0	0	0	0	0	0	FALSE
79669	C3orf52	0	0	0	0	0	0	0	0	0	0	0	0	0	0	0	0	0	0	FALSE
205428	DIPK2A	0	0	0	0	0	0	0	0	0	0	0	0	0	0	0	0	0	0	FALSE
200844	C3orf67	0	0	0	0	0	0	0	0	0	0	0	0	0	0	0	0	0	0	FALSE
401097	C3orf80	0	0	0	0	0	0	0	0	0	0	0	0	0	0	0	0	0	0	FALSE
722	C4BPA	0	0	0	0	0	0	0	0	0	0	0	0	0	0	0	0	0	0	FALSE
725	C4BPB	0	0	0	0	0	0	0	0	0	0	0	0	0	0	0	0	0	0	FALSE
132321	C4orf33	0	0	0	0	0	0	0	0	0	0	0	0	0	0	0	0	0	0	FALSE
132989	C4orf36	0	0	0	0	0	0	0	0	0	0	0	0	0	0	0	0	0	0	FALSE
152940	C4orf45	0	0	0	0	0	0	0	0	0	0	0	0	0	0	0	0	0	0	FALSE
401115	C4orf48	0	0	0	0	0	0	0	0	0	0	0	0	0	0	0	0	0	0	FALSE
727	C5	0	0	0	0	0	0	0	0	0	0	0	0	0	0	0	0	0	0	FALSE
728	C5AR1	0	0	0	0	0	0	0	0	0	0	0	0	0	0	0	0	0	0	FALSE
27202	C5AR2	0	0	0	0	0	0	0	0	0	0	0	0	0	0	0	0	0	0	FALSE
56951	C5orf15	0	0	0	0	0	0	0	0	0	0	0	0	0	0	0	0	0	0	FALSE
55322	C5orf22	0	0	0	0	0	0	0	0	0	0	0	0	0	0	0	0	0	0	FALSE
134553	C5orf24	0	0	0	0	0	0	0	0	0	0	0	0	0	0	0	0	0	0	FALSE
375444	C5orf34	0	0	0	0	0	0	0	0	0	0	0	0	0	0	0	0	0	0	FALSE
389336	C5orf46	0	0	0	0	0	0	0	0	0	0	0	0	0	0	0	0	0	0	FALSE
133491	C5orf47	0	0	0	0	0	0	0	0	0	0	0	0	0	0	0	0	0	0	FALSE
285636	C5orf51	0	0	0	0	0	0	0	0	0	0	0	0	0	0	0	0	0	0	FALSE
100190949	C5orf52	0	0	0	0	0	0	0	0	0	0	0	0	0	0	0	0	0	0	FALSE
729	C6	0	0	0	0	0	0	0	0	0	0	0	0	0	0	0	0	0	0	FALSE
10665	TSBP1	0	0	0	0	0	0	0	0	0	0	0	0	0	0	0	0	0	0	FALSE
64771	ILRUN	0	0	0	0	0	0	0	0	0	0	0	0	0	0	0	0	0	0	FALSE
168090	C6orf118	0	0	0	0	0	0	0	0	0	0	0	0	0	0	0	0	0	0	FALSE
221545	C6orf136	0	0	0	0	0	0	0	0	0	0	0	0	0	0	0	0	0	0	FALSE
29113	C6orf15	0	0	0	0	0	0	0	0	0	0	0	0	0	0	0	0	0	0	FALSE
206412	C6orf163	0	0	0	0	0	0	0	0	0	0	0	0	0	0	0	0	0	0	FALSE
404220	C6orf201	0	0	0	0	0	0	0	0	0	0	0	0	0	0	0	0	0	0	FALSE
221416	C6orf223	0	0	0	0	0	0	0	0	0	0	0	0	0	0	0	0	0	0	FALSE
50854	SNHG32	0	0	0	0	0	0	0	0	0	0	0	0	0	0	0	0	0	0	FALSE
347744	C6orf52	0	0	0	0	0	0	0	0	0	0	0	0	0	0	0	0	0	0	FALSE
352999	C6orf58	0	0	0	0	0	0	0	0	0	0	0	0	0	0	0	0	0	0	FALSE
81688	C6orf62	0	0	0	0	0	0	0	0	0	0	0	0	0	0	0	0	0	0	FALSE
221477	C6orf89	0	0	0	0	0	0	0	0	0	0	0	0	0	0	0	0	0	0	FALSE
730	C7	0	0	0	0	0	0	0	0	0	0	0	0	0	0	0	0	0	0	FALSE
136895	C7orf31	0	0	0	0	0	0	0	0	0	0	0	0	0	0	0	0	0	0	FALSE
55262	MAP11	0	0	0	0	0	0	0	0	0	0	0	0	0	0	0	0	0	0	FALSE
136288	C7orf57	0	0	0	0	0	0	0	0	0	0	0	0	0	0	0	0	0	0	FALSE
731	C8A	0	0	0	0	0	0	0	0	0	0	0	0	0	0	0	0	0	0	FALSE
732	C8B	0	0	0	0	0	0	0	0	0	0	0	0	0	0	0	0	0	0	FALSE
733	C8G	0	0	0	0	0	0	0	0	0	0	0	0	0	0	0	0	0	0	FALSE
65265	C8orf33	0	0	0	0	0	0	0	0	0	0	0	0	0	0	0	0	0	0	FALSE
116328	C8orf34	0	0	0	0	0	0	0	0	0	0	0	0	0	0	0	0	0	0	FALSE
157657	C8orf37	0	0	0	0	0	0	0	0	0	0	0	0	0	0	0	0	0	0	FALSE
56260	C8orf44	0	0	0	0	0	0	0	0	0	0	0	0	0	0	0	0	0	0	FALSE
157773	C8orf48	0	0	0	0	0	0	0	0	0	0	0	0	0	0	0	0	0	0	FALSE
414919	C8orf82	0	0	0	0	0	0	0	0	0	0	0	0	0	0	0	0	0	0	FALSE
389649	C8orf86	0	0	0	0	0	0	0	0	0	0	0	0	0	0	0	0	0	0	FALSE
735	C9	0	0	0	0	0	0	0	0	0	0	0	0	0	0	0	0	0	0	FALSE
138724	C9orf131	0	0	0	0	0	0	0	0	0	0	0	0	0	0	0	0	0	0	FALSE
138255	C9orf135	0	0	0	0	0	0	0	0	0	0	0	0	0	0	0	0	0	0	FALSE
401546	C9orf152	0	0	0	0	0	0	0	0	0	0	0	0	0	0	0	0	0	0	FALSE
84688	C9orf24	0	0	0	0	0	0	0	0	0	0	0	0	0	0	0	0	0	0	FALSE
84909	AOPEP	0	0	0	0	0	0	0	0	0	0	0	0	0	0	0	0	0	0	FALSE
55071	C9orf40	0	0	0	0	0	0	0	0	0	0	0	0	0	0	0	0	0	0	FALSE
257169	C9orf43	0	0	0	0	0	0	0	0	0	0	0	0	0	0	0	0	0	0	FALSE
157983	DOCK8-AS1	0	0	0	0	0	0	0	0	0	0	0	0	0	0	0	0	0	0	FALSE
203228	C9orf72	0	0	0	0	0	0	0	0	0	0	0	0	0	0	0	0	0	0	FALSE
138241	C9orf85	0	0	0	0	0	0	0	0	0	0	0	0	0	0	0	0	0	0	FALSE
759	CA1	0	0	0	0	0	0	0	0	0	0	0	0	0	0	0	0	0	0	FALSE
56934	CA10	0	0	0	0	0	0	0	0	0	0	0	0	0	0	0	0	0	0	FALSE
770	CA11	0	0	0	0	0	0	0	0	0	0	0	0	0	0	0	0	0	0	FALSE
771	CA12	0	0	0	0	0	0	0	0	0	0	0	0	0	0	0	0	0	0	FALSE
377677	CA13	0	0	0	0	0	0	0	0	0	0	0	0	0	0	0	0	0	0	FALSE
23632	CA14	0	0	0	0	0	0	0	0	0	0	0	0	0	0	0	0	0	0	FALSE
760	CA2	0	0	0	0	0	0	0	0	0	0	0	0	0	0	0	0	0	0	FALSE
761	CA3	0	0	0	0	0	0	0	0	0	0	0	0	0	0	0	0	0	0	FALSE
762	CA4	0	0	0	0	0	0	0	0	0	0	0	0	0	0	0	0	0	0	FALSE
763	CA5A	0	0	0	0	0	0	0	0	0	0	0	0	0	0	0	0	0	0	FALSE
11238	CA5B	0	0	0	0	0	0	0	0	0	0	0	0	0	0	0	0	0	0	FALSE
765	CA6	0	0	0	0	0	0	0	0	0	0	0	0	0	0	0	0	0	0	FALSE
766	CA7	0	0	0	0	0	0	0	0	0	0	0	0	0	0	0	0	0	0	FALSE
767	CA8	0	0	0	0	0	0	0	0	0	0	0	0	0	0	0	0	0	0	FALSE
768	CA9	0	0	0	0	0	0	0	0	0	0	0	0	0	0	0	0	0	0	FALSE
51719	CAB39	0	0	0	0	0	0	0	0	0	0	0	0	0	0	0	0	0	0	FALSE
81617	CAB39L	0	0	0	0	0	0	0	0	0	0	0	0	0	0	0	0	0	0	FALSE
23523	CABIN1	0	0	0	0	0	0	0	0	0	0	0	0	0	0	0	0	0	0	FALSE
81928	CABLES2	0	0	0	0	0	0	0	0	0	0	0	0	0	0	0	0	0	0	FALSE
9478	CABP1	0	0	0	0	0	0	0	0	0	0	0	0	0	0	0	0	0	0	FALSE
51475	CABP2	0	0	0	0	0	0	0	0	0	0	0	0	0	0	0	0	0	0	FALSE
57010	CABP4	0	0	0	0	0	0	0	0	0	0	0	0	0	0	0	0	0	0	FALSE
56344	CABP5	0	0	0	0	0	0	0	0	0	0	0	0	0	0	0	0	0	0	FALSE
164633	CABP7	0	0	0	0	0	0	0	0	0	0	0	0	0	0	0	0	0	0	FALSE
85438	CABS1	0	0	0	0	0	0	0	0	0	0	0	0	0	0	0	0	0	0	FALSE
26256	CABYR	0	0	0	0	0	0	0	0	0	0	0	0	0	0	0	0	0	0	FALSE
11094	CACFD1	0	0	0	0	0	0	0	0	0	0	0	0	0	0	0	0	0	0	FALSE
57685	CACHD1	0	0	0	0	0	0	0	0	0	0	0	0	0	0	0	0	0	0	FALSE
773	CACNA1A	0	0	0	0	0	0	0	0	0	0	0	0	0	0	0	0	0	0	FALSE
774	CACNA1B	0	0	0	0	0	0	0	0	0	0	0	0	0	0	0	0	0	0	FALSE
775	CACNA1C	0	0	0	0	0	0	0	0	0	0	0	0	0	0	0	0	0	0	FALSE
776	CACNA1D	0	0	0	0	0	0	0	0	0	0	0	0	0	0	0	0	0	0	FALSE
777	CACNA1E	0	0	0	0	0	0	0	0	0	0	0	0	0	0	0	0	0	0	FALSE
778	CACNA1F	0	0	0	0	0	0	0	0	0	0	0	0	0	0	0	0	0	0	FALSE
8913	CACNA1G	0	0	0	0	0	0	0	0	0	0	0	0	0	0	0	0	0	0	FALSE
8912	CACNA1H	0	0	0	0	0	0	0	0	0	0	0	0	0	0	0	0	0	0	FALSE
8911	CACNA1I	0	0	0	0	0	0	0	0	0	0	0	0	0	0	0	0	0	0	FALSE
779	CACNA1S	0	0	0	0	0	0	0	0	0	0	0	0	0	0	0	0	0	0	FALSE
781	CACNA2D1	0	0	0	0	0	0	0	0	0	0	0	0	0	0	0	0	0	0	FALSE
9254	CACNA2D2	0	0	0	0	0	0	0	0	0	0	0	0	0	0	0	0	0	0	FALSE
55799	CACNA2D3	0	0	0	0	0	0	0	0	0	0	0	0	0	0	0	0	0	0	FALSE
93589	CACNA2D4	0	0	0	0	0	0	0	0	0	0	0	0	0	0	0	0	0	0	FALSE
782	CACNB1	0	0	0	0	0	0	0	0	0	0	0	0	0	0	0	0	0	0	FALSE
783	CACNB2	0	0	0	0	0	0	0	0	0	0	0	0	0	0	0	0	0	0	FALSE
784	CACNB3	0	0	0	0	0	0	0	0	0	0	0	0	0	0	0	0	0	0	FALSE
785	CACNB4	0	0	0	0	0	0	0	0	0	0	0	0	0	0	0	0	0	0	FALSE
786	CACNG1	0	0	0	0	0	0	0	0	0	0	0	0	0	0	0	0	0	0	FALSE
10369	CACNG2	0	0	0	0	0	0	0	0	0	0	0	0	0	0	0	0	0	0	FALSE
10368	CACNG3	0	0	0	0	0	0	0	0	0	0	0	0	0	0	0	0	0	0	FALSE
27092	CACNG4	0	0	0	0	0	0	0	0	0	0	0	0	0	0	0	0	0	0	FALSE
27091	CACNG5	0	0	0	0	0	0	0	0	0	0	0	0	0	0	0	0	0	0	FALSE
59285	CACNG6	0	0	0	0	0	0	0	0	0	0	0	0	0	0	0	0	0	0	FALSE
59284	CACNG7	0	0	0	0	0	0	0	0	0	0	0	0	0	0	0	0	0	0	FALSE
59283	CACNG8	0	0	0	0	0	0	0	0	0	0	0	0	0	0	0	0	0	0	FALSE
143384	CACUL1	0	0	0	0	0	0	0	0	0	0	0	0	0	0	0	0	0	0	FALSE
27101	CACYBP	0	0	0	0	0	0	0	0	0	0	0	0	0	0	0	0	0	0	FALSE
790	CAD	0	1	0	0	0	0	0	0	0	0	0	0	0	0	0	0	0	1	FALSE
23705	CADM1	0	0	0	0	0	0	0	0	0	0	0	0	0	0	0	0	0	0	FALSE
253559	CADM2	0	0	0	0	0	0	0	0	0	0	0	0	0	0	0	0	0	0	FALSE
57863	CADM3	0	0	0	0	0	0	0	0	0	0	0	0	0	0	0	0	0	0	FALSE
199731	CADM4	0	0	0	0	0	0	0	0	0	0	0	0	0	0	0	0	0	0	FALSE
8618	CADPS	0	0	0	0	0	0	0	0	0	0	0	0	0	0	0	0	0	0	FALSE
93664	CADPS2	0	0	0	0	0	0	0	0	0	0	0	0	0	0	0	0	0	0	FALSE
285782	CAGE1	0	0	0	0	0	0	0	0	0	0	0	0	0	0	0	0	0	0	FALSE
793	CALB1	0	0	0	0	0	0	0	0	0	0	0	0	0	0	0	0	0	0	FALSE
794	CALB2	0	0	0	0	0	0	0	0	0	0	0	0	0	0	0	0	0	0	FALSE
796	CALCA	0	0	0	0	0	0	0	0	0	0	0	0	0	0	0	0	0	0	FALSE
797	CALCB	0	0	0	0	0	0	0	0	0	0	0	0	0	0	0	0	0	0	FALSE
10241	CALCOCO2	0	0	0	0	0	0	0	0	0	0	0	0	0	0	0	0	0	0	FALSE
799	CALCR	0	0	0	0	0	0	0	0	0	0	0	0	0	0	0	0	0	0	FALSE
10203	CALCRL	0	0	0	0	0	0	0	0	0	0	0	0	0	0	0	0	0	0	FALSE
800	CALD1	0	0	0	0	0	0	0	0	0	0	0	0	0	0	0	0	0	0	FALSE
255022	CALHM1	0	0	0	0	0	0	0	0	0	0	0	0	0	0	0	0	0	0	FALSE
119395	CALHM3	0	0	0	0	0	0	0	0	0	0	0	0	0	0	0	0	0	0	FALSE
221301	CALHM4	0	0	0	0	0	0	0	0	0	0	0	0	0	0	0	0	0	0	FALSE
254228	CALHM5	0	0	0	0	0	0	0	0	0	0	0	0	0	0	0	0	0	0	FALSE
801	CALM1	0	0	0	0	0	0	0	0	0	0	0	0	0	0	0	0	0	0	FALSE
805	CALM2	0	0	0	0	0	0	0	0	0	0	0	0	0	0	0	0	0	0	FALSE
808	CALM3	0	0	0	0	0	0	0	0	0	0	0	0	0	0	0	0	0	0	FALSE
91860	CALML4	0	0	0	0	0	0	0	0	0	0	0	0	0	0	0	0	0	0	FALSE
51806	CALML5	0	0	0	0	0	0	0	0	0	0	0	0	0	0	0	0	0	0	FALSE
163688	CALML6	0	0	0	0	0	0	0	0	0	0	0	0	0	0	0	0	0	0	FALSE
83698	CALN1	0	0	0	0	0	0	0	0	0	0	0	0	0	0	0	0	0	0	FALSE
811	CALR	0	0	0	0	0	0	0	0	0	0	0	0	0	0	0	0	0	0	FALSE
125972	CALR3	0	0	0	0	0	0	0	0	0	0	0	0	0	0	0	0	0	0	FALSE
813	CALU	0	0	0	0	0	0	0	0	0	0	0	0	0	0	0	0	0	0	FALSE
50632	CALY	0	0	0	0	0	0	0	0	0	0	0	0	0	0	0	0	0	0	FALSE
8536	CAMK1	0	0	0	0	0	0	0	0	0	0	0	0	0	0	0	0	0	0	FALSE
57118	CAMK1D	0	0	0	0	0	0	0	0	0	0	0	0	0	0	0	0	0	0	FALSE
57172	CAMK1G	0	0	0	0	0	0	0	0	0	0	0	0	0	0	0	0	0	0	FALSE
815	CAMK2A	0	0	0	0	0	0	0	0	0	0	0	0	0	0	0	0	0	0	FALSE
816	CAMK2B	0	0	0	0	0	0	0	0	0	0	0	0	0	0	0	0	0	0	FALSE
817	CAMK2D	0	0	0	0	0	0	0	0	0	0	0	0	0	0	0	0	0	0	FALSE
818	CAMK2G	0	0	0	0	0	0	0	0	0	0	0	0	0	0	0	0	0	0	FALSE
55450	CAMK2N1	0	0	0	0	0	0	0	0	0	0	0	0	0	0	0	0	0	0	FALSE
814	CAMK4	0	0	0	0	0	0	0	0	0	0	0	0	0	0	0	0	0	0	FALSE
84254	CAMKK1	0	0	0	0	0	0	0	0	0	0	0	0	0	0	0	0	0	0	FALSE
10645	CAMKK2	0	0	0	0	0	0	0	0	0	0	0	0	0	0	0	0	0	0	FALSE
79823	CAMKMT	0	0	0	0	0	0	0	0	0	0	0	0	0	0	0	0	0	0	FALSE
79012	CAMKV	0	0	0	0	0	0	0	0	0	0	0	0	0	0	0	0	0	0	FALSE
819	CAMLG	0	0	0	0	0	0	0	0	0	0	0	0	0	0	0	0	0	0	FALSE
820	CAMP	0	0	0	0	0	0	0	0	0	0	0	0	0	0	0	0	0	0	FALSE
23261	CAMTA1	0	0	0	0	0	0	0	0	0	0	0	0	0	0	0	0	0	0	FALSE
23125	CAMTA2	0	0	0	0	0	0	0	0	0	0	0	0	0	0	0	0	0	0	FALSE
55832	CAND1	0	0	0	0	0	0	0	0	0	0	0	0	0	0	0	0	0	0	FALSE
23066	CAND2	0	0	0	0	0	0	0	0	0	0	0	0	0	0	0	0	0	0	FALSE
124583	CANT1	0	0	0	0	0	0	0	0	0	0	0	0	0	0	0	0	0	0	FALSE
821	CANX	0	0	0	0	0	0	0	0	0	0	0	0	0	0	0	0	0	0	FALSE
10487	CAP1	0	0	0	0	0	0	0	0	0	0	0	0	0	0	0	0	0	0	FALSE
10486	CAP2	0	0	0	0	0	0	0	0	0	0	0	0	0	0	0	0	0	0	FALSE
822	CAPG	0	0	0	0	0	0	0	0	0	0	0	0	0	0	0	0	0	0	FALSE
823	CAPN1	0	0	0	0	0	0	0	0	0	0	0	0	0	0	0	0	0	0	FALSE
11132	CAPN10	0	0	0	0	0	0	0	0	0	0	0	0	0	0	0	0	0	0	FALSE
11131	CAPN11	0	0	0	0	0	0	0	0	0	0	0	0	0	0	0	0	0	0	FALSE
147968	CAPN12	0	0	0	0	0	0	0	0	0	0	0	0	0	0	0	0	0	0	FALSE
92291	CAPN13	0	0	0	0	0	0	0	0	0	0	0	0	0	0	0	0	0	0	FALSE
6650	CAPN15	0	0	0	0	0	0	0	0	0	0	0	0	0	0	0	0	0	0	FALSE
824	CAPN2	0	0	0	0	0	0	0	0	0	0	0	0	0	0	0	0	0	0	FALSE
825	CAPN3	0	0	0	0	0	0	0	0	0	0	0	0	0	0	0	0	0	0	FALSE
726	CAPN5	0	0	0	0	0	0	0	0	0	0	0	0	0	0	0	0	0	0	FALSE
827	CAPN6	0	0	0	0	0	0	0	0	0	0	0	0	0	0	0	0	0	0	FALSE
23473	CAPN7	0	0	0	0	0	0	0	0	0	0	0	0	0	0	0	0	0	0	FALSE
10753	CAPN9	0	0	0	0	0	0	0	0	0	0	0	0	0	0	0	0	0	0	FALSE
826	CAPNS1	0	0	0	0	0	0	0	0	0	0	0	0	0	0	0	0	0	0	FALSE
84290	CAPNS2	0	0	0	0	0	0	0	0	0	0	0	0	0	0	0	0	0	0	FALSE
4076	CAPRIN1	0	0	0	0	0	0	0	0	0	0	0	0	0	0	0	0	0	0	FALSE
65981	CAPRIN2	0	0	0	0	0	0	0	0	0	0	0	0	0	0	0	0	0	0	FALSE
828	CAPS	0	0	0	0	0	0	0	0	0	0	0	0	0	0	0	0	0	0	FALSE
84698	CAPS2	0	0	0	0	0	0	0	0	0	0	0	0	0	0	0	0	0	0	FALSE
829	CAPZA1	0	0	0	0	0	0	0	0	0	0	0	0	0	0	0	0	0	0	FALSE
830	CAPZA2	0	0	0	0	0	0	0	0	0	0	0	0	0	0	0	0	0	0	FALSE
93661	CAPZA3	0	0	0	0	0	0	0	0	0	0	0	0	0	0	0	0	0	0	FALSE
832	CAPZB	0	1	1	0	0	0	1	0	0	1	0	1	1	0	0	0	0	6	FALSE
29775	CARD10	0	0	0	0	0	0	0	0	0	0	0	0	0	0	0	0	0	0	FALSE
84433	CARD11	0	0	0	0	0	0	0	0	0	0	0	0	0	0	0	0	0	0	FALSE
79092	CARD14	0	0	0	0	0	0	0	0	0	0	0	0	0	0	0	0	0	0	FALSE
114769	CARD16	0	0	0	0	0	0	0	0	0	0	0	0	0	0	0	0	0	0	FALSE
440068	CARD17	0	0	0	0	0	0	0	0	0	0	0	0	0	0	0	0	0	0	FALSE
59082	CARD18	0	0	0	0	0	0	0	0	0	0	0	0	0	0	0	0	0	0	FALSE
84674	CARD6	0	0	0	0	0	0	0	0	0	0	0	0	0	0	0	0	0	0	FALSE
22900	CARD8	0	0	0	0	0	0	0	0	0	0	0	0	0	0	0	0	0	0	FALSE
64170	CARD9	0	0	0	0	0	0	0	0	0	0	0	0	0	0	0	0	0	0	FALSE
79800	CARF	0	0	0	0	0	0	0	0	0	0	0	0	0	0	0	0	0	0	FALSE
23589	CARHSP1	0	0	0	0	0	0	0	0	0	0	0	0	0	0	0	0	0	0	FALSE
10498	CARM1	0	0	0	0	0	0	0	0	0	0	0	0	0	0	0	0	0	0	FALSE
55604	CARMIL1	0	0	0	0	0	0	0	0	0	0	0	0	0	0	0	0	0	0	FALSE
146206	CARMIL2	0	0	0	0	0	0	0	0	0	0	0	0	0	0	0	0	0	0	FALSE
833	CARS	0	0	0	0	0	0	0	0	0	0	0	0	0	0	0	0	0	0	FALSE
79587	CARS2	0	0	0	0	0	0	0	0	0	0	0	0	0	0	0	0	0	0	FALSE
9607	CARTPT	0	0	0	0	0	0	0	0	0	0	0	0	0	0	0	0	0	0	FALSE
55259	CASC1	0	0	0	0	0	0	0	0	0	0	0	0	0	0	0	0	0	0	FALSE
22794	CASC3	0	0	0	0	0	0	0	0	0	0	0	0	0	0	0	0	0	0	FALSE
113201	CASC4	0	0	0	0	0	0	0	0	0	0	0	0	0	0	0	0	0	0	FALSE
64921	CASD1	0	0	0	0	0	0	0	0	0	0	0	0	0	0	0	0	0	0	FALSE
8573	CASK	0	0	0	0	0	0	0	0	0	0	0	0	0	0	0	0	0	0	FALSE
57524	CASKIN1	0	0	0	0	0	0	0	0	0	0	0	0	0	0	0	0	0	0	FALSE
57513	CASKIN2	0	0	0	0	0	0	0	0	0	0	0	0	0	0	0	0	0	0	FALSE
834	CASP1	0	0	0	0	0	0	0	0	0	0	0	0	0	0	0	0	0	0	FALSE
843	CASP10	0	0	0	0	0	0	0	0	0	0	0	0	0	0	0	0	0	0	FALSE
23581	CASP14	0	0	0	0	0	0	0	0	0	0	0	0	0	0	0	0	0	0	FALSE
835	CASP2	0	0	0	0	0	0	0	0	0	0	0	0	0	0	0	0	0	0	FALSE
836	CASP3	0	0	0	0	0	0	0	0	0	0	0	0	0	0	0	0	0	0	FALSE
837	CASP4	0	0	0	0	0	0	0	0	0	0	0	0	0	0	0	0	0	0	FALSE
838	CASP5	0	0	0	0	0	0	0	0	0	0	0	0	0	0	0	0	0	0	FALSE
839	CASP6	0	0	0	0	0	0	0	0	0	0	0	0	0	0	0	0	0	0	FALSE
840	CASP7	0	0	0	0	0	0	0	0	0	0	0	0	0	0	0	0	0	0	FALSE
841	CASP8	0	0	0	0	0	0	0	0	0	0	0	0	0	0	0	0	0	0	FALSE
842	CASP9	0	0	0	0	0	0	0	0	0	0	0	0	0	0	0	0	0	0	FALSE
844	CASQ1	0	0	0	0	0	0	0	0	0	0	0	0	0	0	0	0	0	0	FALSE
845	CASQ2	0	0	0	0	0	0	0	0	0	0	0	0	0	0	0	0	0	0	FALSE
846	CASR	0	0	0	0	0	0	0	0	0	0	0	0	0	0	0	0	0	0	FALSE
831	CAST	0	0	0	0	0	0	0	0	0	0	0	0	0	0	0	0	0	0	FALSE
729438	CASTOR2	0	0	0	0	0	0	0	0	0	0	0	0	0	0	0	0	0	0	FALSE
352954	CASTOR3	0	0	0	0	0	0	0	0	0	0	0	0	0	0	0	0	0	0	FALSE
54897	CASZ1	0	0	0	0	0	0	0	0	0	0	0	0	0	0	0	0	0	0	FALSE
847	CAT	0	0	0	0	0	0	0	0	0	0	0	0	0	0	0	0	0	0	FALSE
117144	CATSPER1	0	0	0	0	0	0	0	0	0	0	0	0	0	0	0	0	0	0	FALSE
347732	CATSPER3	0	0	0	0	0	0	0	0	0	0	0	0	0	0	0	0	0	0	FALSE
378807	CATSPER4	0	0	0	0	0	0	0	0	0	0	0	0	0	0	0	0	0	0	FALSE
79820	CATSPERB	0	0	0	0	0	0	0	0	0	0	0	0	0	0	0	0	0	0	FALSE
257062	CATSPERD	0	0	0	0	0	0	0	0	0	0	0	0	0	0	0	0	0	0	FALSE
257044	CATSPERE	0	0	0	0	0	0	0	0	0	0	0	0	0	0	0	0	0	0	FALSE
57828	CATSPERG	0	0	0	0	0	0	0	0	0	0	0	0	0	0	0	0	0	0	FALSE
857	CAV1	0	0	0	0	0	0	0	0	0	0	0	0	0	0	0	0	0	0	FALSE
858	CAV2	0	0	0	0	0	0	0	0	0	0	0	0	0	0	0	0	0	0	FALSE
859	CAV3	0	0	0	0	0	0	0	0	0	0	0	0	0	0	0	0	0	0	FALSE
284119	CAVIN1	0	0	0	0	0	0	0	0	0	0	0	0	0	0	0	0	0	0	FALSE
8436	CAVIN2	0	0	0	0	0	0	0	0	0	0	0	0	0	0	0	0	0	0	FALSE
112464	CAVIN3	0	0	0	0	0	0	0	0	0	0	0	0	0	0	0	0	0	0	FALSE
347273	CAVIN4	0	0	0	0	0	0	0	0	0	0	0	0	0	0	0	0	0	0	FALSE
9139	CBFA2T2	0	0	0	0	0	0	0	0	0	0	0	0	0	0	0	0	0	0	FALSE
863	CBFA2T3	0	0	0	0	0	0	0	0	0	0	0	0	0	0	0	0	0	0	FALSE
865	CBFB	0	0	0	0	0	0	0	0	0	0	0	0	0	0	0	0	0	0	FALSE
867	CBL	0	0	0	0	0	0	0	0	0	0	0	0	0	0	0	0	0	0	FALSE
868	CBLB	0	0	0	0	0	0	0	0	0	0	0	0	0	0	0	0	0	0	FALSE
23624	CBLC	0	0	0	0	0	0	0	0	0	0	0	0	0	0	0	0	0	0	FALSE
79872	CBLL1	0	0	0	0	0	0	0	0	0	0	0	0	0	0	0	0	0	0	FALSE
158506	CBLL2	0	0	0	0	0	0	0	0	0	0	0	0	0	0	0	0	0	0	FALSE
869	CBLN1	0	0	0	0	0	0	0	0	0	0	0	0	0	0	0	0	0	0	FALSE
147381	CBLN2	0	0	0	0	0	0	0	0	0	0	0	0	0	0	0	0	0	0	FALSE
643866	CBLN3	0	0	0	0	0	0	0	0	0	0	0	0	0	0	0	0	0	0	FALSE
140689	CBLN4	0	0	0	0	0	0	0	0	0	0	0	0	0	0	0	0	0	0	FALSE
873	CBR1	0	0	0	0	0	0	0	0	0	0	0	0	0	0	0	0	0	0	FALSE
874	CBR3	0	0	0	0	0	0	0	0	0	0	0	0	0	0	0	0	0	0	FALSE
84869	CBR4	0	0	0	0	0	0	0	0	0	0	0	0	0	0	0	0	0	0	FALSE
55871	CBWD1	0	0	0	0	0	0	0	0	0	0	0	0	0	0	0	0	0	0	FALSE
150472	CBWD2	0	0	0	0	0	0	0	0	0	0	0	0	0	0	0	0	0	0	FALSE
10951	CBX1	0	0	0	0	0	0	0	0	0	0	0	0	0	0	0	0	0	0	FALSE
84733	CBX2	0	0	0	0	0	0	0	0	0	0	0	0	0	0	0	0	0	0	FALSE
11335	CBX3	0	0	0	0	0	0	0	0	0	0	0	0	0	0	0	0	0	0	FALSE
8535	CBX4	0	0	0	0	0	0	0	0	0	0	0	0	0	0	0	0	0	0	FALSE
23468	CBX5	0	0	0	0	0	0	0	0	0	0	0	0	0	0	0	0	0	0	FALSE
23466	CBX6	0	0	0	0	0	0	0	0	0	0	0	0	0	0	0	0	0	0	FALSE
23492	CBX7	0	0	0	0	0	0	0	0	0	0	0	0	0	0	0	0	0	0	FALSE
57332	CBX8	0	0	0	0	0	0	0	0	0	0	0	0	0	0	0	0	0	0	FALSE
54862	CC2D1A	0	0	1	0	0	0	0	0	0	0	0	0	0	0	0	0	0	1	FALSE
55749	CCAR1	0	0	0	0	0	0	0	0	0	0	0	0	0	0	0	0	0	0	FALSE
57805	CCAR2	0	0	0	0	0	0	0	0	0	0	0	0	0	0	0	0	0	0	FALSE
147372	CCBE1	0	0	0	0	0	0	0	0	0	0	0	0	0	0	0	0	0	0	FALSE
79839	CCDC102B	0	0	0	0	0	0	0	0	0	0	0	0	0	0	0	0	0	0	FALSE
256309	CCDC110	0	0	0	0	0	0	0	0	0	0	0	0	0	0	0	0	0	0	FALSE
153733	CCDC112	0	0	0	0	0	0	0	0	0	0	0	0	0	0	0	0	0	0	FALSE
29070	CCDC113	0	0	0	0	0	0	0	0	0	0	0	0	0	0	0	0	0	0	FALSE
93233	CCDC114	0	0	0	0	0	0	0	0	0	0	0	0	0	0	0	0	0	0	FALSE
84317	CCDC115	0	0	0	0	0	0	0	0	0	0	0	0	0	0	0	0	0	0	FALSE
164592	CCDC116	0	0	0	0	0	0	0	0	0	0	0	0	0	0	0	0	0	0	FALSE
150275	CCDC117	0	0	0	0	0	0	0	0	0	0	0	0	0	0	0	0	0	0	FALSE
151903	CCDC12	0	0	0	0	0	0	0	0	0	0	0	0	0	0	0	0	0	0	FALSE
79635	CCDC121	0	0	0	0	0	0	0	0	0	0	0	0	0	0	0	0	0	0	FALSE
160857	CCDC122	0	0	0	0	0	0	0	0	0	0	0	0	0	0	0	0	0	0	FALSE
90693	CCDC126	0	0	0	0	0	0	0	0	0	0	0	0	0	0	0	0	0	0	FALSE
64753	CCDC136	0	0	0	0	0	0	0	0	0	0	0	0	0	0	0	0	0	0	FALSE
165055	CCDC138	0	0	0	0	0	0	0	0	0	0	0	0	0	0	0	0	0	0	FALSE
64770	CCDC14	0	0	0	0	0	0	0	0	0	0	0	0	0	0	0	0	0	0	FALSE
151278	CCDC140	0	0	0	0	0	0	0	0	0	0	0	0	0	0	0	0	0	0	FALSE
9720	CCDC144A	0	0	0	0	0	0	0	0	0	0	0	0	0	0	0	0	0	0	FALSE
339184	CCDC144NL	0	0	0	0	0	0	0	0	0	0	0	0	0	0	0	0	0	0	FALSE
57639	CCDC146	0	0	0	0	0	0	0	0	0	0	0	0	0	0	0	0	0	0	FALSE
130940	CCDC148	0	0	0	0	0	0	0	0	0	0	0	0	0	0	0	0	0	0	FALSE
91050	CCDC149	0	0	0	0	0	0	0	0	0	0	0	0	0	0	0	0	0	0	FALSE
284992	CCDC150	0	0	0	0	0	0	0	0	0	0	0	0	0	0	0	0	0	0	FALSE
115948	CCDC151	0	0	0	0	0	0	0	0	0	0	0	0	0	0	0	0	0	0	FALSE
147872	CCDC155	0	0	0	0	0	0	0	0	0	0	0	0	0	0	0	0	0	0	FALSE
154467	CCDC167	0	0	0	0	0	0	0	0	0	0	0	0	0	0	0	0	0	0	FALSE
728591	CCDC169	0	0	0	0	0	0	0	0	0	0	0	0	0	0	0	0	0	0	FALSE
149483	CCDC17	0	0	0	0	0	0	0	0	0	0	0	0	0	0	0	0	0	0	FALSE
80129	CCDC170	0	0	0	0	0	0	0	0	0	0	0	0	0	0	0	0	0	0	FALSE
203238	CCDC171	0	0	0	0	0	0	0	0	0	0	0	0	0	0	0	0	0	0	FALSE
374355	CCDC172	0	0	0	0	0	0	0	0	0	0	0	0	0	0	0	0	0	0	FALSE
374864	CCDC178	0	0	0	0	0	0	0	0	0	0	0	0	0	0	0	0	0	0	FALSE
100499483	CCDC180	0	0	0	0	0	0	0	0	0	0	0	0	0	0	0	0	0	0	FALSE
57821	CCDC181	0	0	0	0	0	0	0	0	0	0	0	0	0	0	0	0	0	0	FALSE
84960	CCDC183	0	0	0	0	0	0	0	0	0	0	0	0	0	0	0	0	0	0	FALSE
55088	CCDC186	0	0	0	0	0	0	0	0	0	0	0	0	0	0	0	0	0	0	FALSE
90835	CCDC189	0	0	0	0	0	0	0	0	0	0	0	0	0	0	0	0	0	0	FALSE
339512	CCDC190	0	0	0	0	0	0	0	0	0	0	0	0	0	0	0	0	0	0	FALSE
57577	CCDC191	0	0	0	0	0	0	0	0	0	0	0	0	0	0	0	0	0	0	FALSE
55195	CCDC198	0	0	0	0	0	0	0	0	0	0	0	0	0	0	0	0	0	0	FALSE
28952	CCDC22	0	0	0	0	0	0	0	0	0	0	0	0	0	0	0	0	0	0	FALSE
55246	CCDC25	0	0	0	0	0	0	0	0	0	0	0	0	0	0	0	0	0	0	FALSE
148870	CCDC27	0	0	0	0	0	0	0	0	0	0	0	0	0	0	0	0	0	0	FALSE
25901	CCDC28A	0	0	0	0	0	0	0	0	0	0	0	0	0	0	0	0	0	0	FALSE
79140	CCDC28B	0	0	0	0	0	0	0	0	0	0	0	0	0	0	0	0	0	0	FALSE
83643	CCDC3	0	0	0	0	0	0	0	0	0	0	0	0	0	0	0	0	0	0	FALSE
91057	CCDC34	0	0	0	0	0	0	0	0	0	0	0	0	0	0	0	0	0	0	FALSE
339834	CCDC36	0	0	0	0	0	0	0	0	0	0	0	0	0	0	0	0	0	0	FALSE
120935	CCDC38	0	0	0	0	0	0	0	0	0	0	0	0	0	0	0	0	0	0	FALSE
146849	CCDC42	0	0	0	0	0	0	0	0	0	0	0	0	0	0	0	0	0	0	FALSE
57003	CCDC47	0	0	0	0	0	0	0	0	0	0	0	0	0	0	0	0	0	0	FALSE
152137	CCDC50	0	0	0	0	0	0	0	0	0	0	0	0	0	0	0	0	0	0	FALSE
79714	CCDC51	0	0	0	0	0	0	0	0	0	0	0	0	0	0	0	0	0	0	FALSE
84692	CCDC54	0	0	0	0	0	0	0	0	0	0	0	0	0	0	0	0	0	0	FALSE
131076	CCDC58	0	0	0	0	0	0	0	0	0	0	0	0	0	0	0	0	0	0	FALSE
8030	CCDC6	0	0	0	0	0	0	0	0	0	0	0	0	0	0	0	0	0	0	FALSE
160777	CCDC60	0	0	0	0	0	0	0	0	0	0	0	0	0	0	0	0	0	0	FALSE
84660	CCDC62	0	0	0	0	0	0	0	0	0	0	0	0	0	0	0	0	0	0	FALSE
160762	CCDC63	0	0	0	0	0	0	0	0	0	0	0	0	0	0	0	0	0	0	FALSE
85478	CCDC65	0	0	0	0	0	0	0	0	0	0	0	0	0	0	0	0	0	0	FALSE
285331	CCDC66	0	0	0	0	0	0	0	0	0	0	0	0	0	0	0	0	0	0	FALSE
[truncated: 13,848 more rows]

## Sheet: S80_C20
EntrezID	GeneSymbol	bone	breast	central_nervous_system	colorectal	esophagus	gastric	kidney	leukemia	liver	lung	multiple_myeloma	ovary	pancreas	skin	upper_aerodigestive	urinary_tract	uterus	n_dependent_lineage	is_commonly_essential
1	A1BG	0	0	0	0	0	0	0	0	0	0	0	0	0	0	0	0	0	0	FALSE
29974	A1CF	0	0	0	0	0	0	0	0	0	0	0	0	0	0	0	0	0	0	FALSE
2	A2M	0	0	0	0	0	0	0	0	0	0	0	0	0	0	0	0	0	0	FALSE
144568	A2ML1	0	0	0	0	0	0	0	0	0	0	0	0	0	0	0	0	0	0	FALSE
53947	A4GALT	0	0	0	0	0	0	0	0	0	0	0	0	0	0	0	0	0	0	FALSE
51146	A4GNT	0	0	0	0	0	0	0	0	0	0	0	0	0	0	0	0	0	0	FALSE
8086	AAAS	0	0	0	0	0	0	0	0	0	0	0	0	0	0	0	0	0	0	FALSE
65985	AACS	0	0	0	0	0	0	0	0	0	0	0	0	0	0	0	0	0	0	FALSE
13	AADAC	0	0	0	0	0	0	0	0	0	0	0	0	0	0	0	0	0	0	FALSE
344752	AADACL2	0	0	0	0	0	0	0	0	0	0	0	0	0	0	0	0	0	0	FALSE
343066	AADACL4	0	0	0	0	0	0	0	0	0	0	0	0	0	0	0	0	0	0	FALSE
51166	AADAT	0	0	0	0	0	0	0	0	0	0	0	0	0	0	0	0	0	0	FALSE
195827	PRXL2C	0	0	0	0	0	0	0	0	0	0	0	0	0	0	0	0	0	0	FALSE
79719	AAGAB	0	0	0	0	0	0	0	0	0	0	0	0	0	0	0	0	0	0	FALSE
22848	AAK1	0	0	0	0	0	0	0	0	0	0	0	0	0	0	0	0	0	0	FALSE
28971	AAMDC	0	0	0	0	0	0	0	0	0	0	0	0	0	0	0	0	0	0	FALSE
14	AAMP	0	0	0	1	1	0	0	0	0	1	0	0	1	0	1	0	0	5	FALSE
15	AANAT	0	0	0	0	0	0	0	0	0	0	0	0	0	0	0	0	0	0	FALSE
25980	AAR2	0	0	0	0	0	0	0	0	0	0	0	0	0	0	0	0	0	0	FALSE
441376	AARD	0	0	0	0	0	0	0	0	0	0	0	0	0	0	0	0	0	0	FALSE
16	AARS	0	0	0	0	0	0	0	0	0	0	0	0	1	0	0	0	0	1	FALSE
57505	AARS2	0	0	0	0	0	0	0	0	0	0	0	0	0	0	0	0	0	0	FALSE
132949	AASDH	0	0	0	0	0	0	0	0	0	0	0	0	0	0	0	0	0	0	FALSE
60496	AASDHPPT	0	0	0	0	0	0	0	0	0	0	0	0	0	0	0	0	0	0	FALSE
10157	AASS	0	0	0	0	0	0	0	0	0	0	0	0	0	0	0	0	0	0	FALSE
26574	AATF	0	0	0	0	0	0	0	0	0	0	0	0	0	0	0	0	0	0	FALSE
9625	AATK	0	0	0	0	0	0	0	0	0	0	0	0	0	0	0	0	0	0	FALSE
18	ABAT	0	0	0	0	0	0	0	0	0	0	0	0	0	0	0	0	0	0	FALSE
19	ABCA1	0	0	0	0	0	0	0	0	0	0	0	0	0	0	0	0	0	0	FALSE
10349	ABCA10	0	0	0	0	0	0	0	0	0	0	0	0	0	0	0	0	0	0	FALSE
26154	ABCA12	0	0	0	0	0	0	0	0	0	0	0	0	0	0	0	0	0	0	FALSE
154664	ABCA13	0	0	0	0	0	0	0	0	0	0	0	0	0	0	0	0	0	0	FALSE
20	ABCA2	0	0	0	0	0	0	0	0	0	0	0	0	0	0	0	0	0	0	FALSE
21	ABCA3	0	0	0	0	0	0	0	0	0	0	0	0	0	0	0	0	0	0	FALSE
24	ABCA4	0	0	0	0	0	0	0	0	0	0	0	0	0	0	0	0	0	0	FALSE
23461	ABCA5	0	0	0	0	0	0	0	0	0	0	0	0	0	0	0	0	0	0	FALSE
23460	ABCA6	0	0	0	0	0	0	0	0	0	0	0	0	0	0	0	0	0	0	FALSE
10347	ABCA7	0	0	0	0	0	0	0	0	0	0	0	0	0	0	0	0	0	0	FALSE
10351	ABCA8	0	0	0	0	0	0	0	0	0	0	0	0	0	0	0	0	0	0	FALSE
10350	ABCA9	0	0	0	0	0	0	0	0	0	0	0	0	0	0	0	0	0	0	FALSE
5243	ABCB1	0	0	0	0	0	0	0	0	0	0	0	0	0	0	0	0	0	0	FALSE
23456	ABCB10	0	0	0	0	0	0	0	0	0	0	0	0	0	0	0	0	0	0	FALSE
8647	ABCB11	0	0	0	0	0	0	0	0	0	0	0	0	0	0	0	0	0	0	FALSE
5244	ABCB4	0	0	0	0	0	0	0	0	0	0	0	0	0	0	0	0	0	0	FALSE
340273	ABCB5	0	0	0	0	0	0	0	0	0	0	0	0	0	0	0	0	0	0	FALSE
10058	ABCB6	0	0	0	0	0	0	0	0	0	0	0	0	0	0	0	0	0	0	FALSE
22	ABCB7	1	1	1	1	1	1	1	1	1	1	1	1	1	1	1	1	1	17	TRUE
11194	ABCB8	0	0	0	0	0	0	0	0	0	0	0	0	0	0	0	0	0	0	FALSE
23457	ABCB9	0	0	0	0	0	0	0	0	0	0	0	0	0	0	0	0	0	0	FALSE
4363	ABCC1	0	0	0	0	0	0	0	0	0	0	0	0	0	0	0	0	0	0	FALSE
89845	ABCC10	0	0	0	0	0	0	0	0	0	0	0	0	0	0	0	0	0	0	FALSE
85320	ABCC11	0	0	0	0	0	0	0	0	0	0	0	0	0	0	0	0	0	0	FALSE
94160	ABCC12	0	0	0	0	0	0	0	0	0	0	0	0	0	0	0	0	0	0	FALSE
1244	ABCC2	0	0	0	0	0	0	0	0	0	0	0	0	0	0	0	0	0	0	FALSE
8714	ABCC3	0	0	0	0	0	0	0	0	0	0	0	0	0	0	0	0	0	0	FALSE
10257	ABCC4	0	0	0	0	0	0	0	0	0	0	0	0	0	0	0	0	0	0	FALSE
10057	ABCC5	0	0	0	0	0	0	0	0	0	0	0	0	0	0	0	0	0	0	FALSE
368	ABCC6	0	0	0	0	0	0	0	0	0	0	0	0	0	0	0	0	0	0	FALSE
6833	ABCC8	0	0	0	0	0	0	0	0	0	0	0	0	0	0	0	0	0	0	FALSE
10060	ABCC9	0	0	0	0	0	0	0	0	0	0	0	0	0	0	0	0	0	0	FALSE
215	ABCD1	0	0	0	0	0	0	0	0	0	0	0	0	0	0	0	0	0	0	FALSE
225	ABCD2	0	0	0	0	0	0	0	0	0	0	0	0	0	0	0	0	0	0	FALSE
5825	ABCD3	0	0	0	0	0	0	0	0	0	0	0	0	0	0	0	0	0	0	FALSE
5826	ABCD4	0	0	0	0	0	0	0	0	0	0	0	0	0	0	0	0	0	0	FALSE
6059	ABCE1	1	1	1	1	1	1	1	1	1	1	1	1	1	1	1	1	1	17	TRUE
23	ABCF1	0	0	0	0	0	0	1	0	0	1	0	1	1	0	0	0	0	4	FALSE
10061	ABCF2	0	0	0	0	0	0	0	0	0	0	0	0	0	0	0	0	0	0	FALSE
55324	ABCF3	0	0	0	0	0	0	0	0	0	0	0	0	0	0	0	0	0	0	FALSE
9619	ABCG1	0	0	0	0	0	0	0	0	0	0	0	0	0	0	0	0	0	0	FALSE
9429	ABCG2	0	0	0	0	0	0	0	0	0	0	0	0	0	0	0	0	0	0	FALSE
64137	ABCG4	0	0	0	0	0	0	0	0	0	0	0	0	0	0	0	0	0	0	FALSE
64240	ABCG5	0	0	0	0	0	0	0	0	0	0	0	0	0	0	0	0	0	0	FALSE
64241	ABCG8	0	0	0	0	0	0	0	0	0	0	0	0	0	0	0	0	0	0	FALSE
55347	ABHD10	0	0	0	0	0	0	0	0	0	0	0	0	0	0	0	0	0	0	FALSE
83451	ABHD11	0	0	0	0	0	0	0	0	0	0	0	0	0	0	0	0	0	0	FALSE
26090	ABHD12	0	0	0	0	0	0	0	0	0	0	0	0	0	0	0	0	0	0	FALSE
145447	ABHD12B	0	0	0	0	0	0	0	0	0	0	0	0	0	0	0	0	0	0	FALSE
84945	ABHD13	0	0	0	0	0	0	0	0	0	0	0	0	0	0	0	0	0	0	FALSE
25864	ABHD14A	0	0	0	0	0	0	0	0	0	0	0	0	0	0	0	0	0	0	FALSE
84836	ABHD14B	0	0	0	0	0	0	0	0	0	0	0	0	0	0	0	0	0	0	FALSE
116236	ABHD15	0	0	0	0	0	0	0	0	0	0	0	0	0	0	0	0	0	0	FALSE
7920	ABHD16A	0	0	0	0	0	0	0	0	0	0	0	0	0	0	0	0	0	0	FALSE
140701	ABHD16B	0	0	0	0	0	0	0	0	0	0	0	0	0	0	0	0	0	0	FALSE
81926	ABHD17A	0	0	0	0	0	0	0	0	0	0	0	0	0	0	0	0	0	0	FALSE
51104	ABHD17B	0	0	0	0	0	0	0	0	0	0	0	0	0	0	0	0	0	0	FALSE
11057	ABHD2	0	0	0	0	0	0	0	0	0	0	0	0	0	0	0	0	0	0	FALSE
171586	ABHD3	0	0	0	0	0	0	0	0	0	0	0	0	0	0	0	0	0	0	FALSE
63874	ABHD4	0	0	0	0	0	0	0	0	0	0	0	0	0	0	0	0	0	0	FALSE
51099	ABHD5	0	0	0	0	0	0	0	0	0	0	0	0	0	0	0	0	0	0	FALSE
57406	ABHD6	0	0	0	0	0	0	0	0	0	0	0	0	0	0	0	0	0	0	FALSE
79575	ABHD8	0	0	0	0	0	0	0	0	0	0	0	0	0	0	0	0	0	0	FALSE
10006	ABI1	0	0	0	0	0	0	0	0	0	0	0	0	0	0	0	0	0	0	FALSE
10152	ABI2	0	0	0	0	0	0	0	0	0	0	0	0	0	0	0	0	0	0	FALSE
51225	ABI3	0	0	0	0	0	0	0	0	0	0	0	0	0	0	0	0	0	0	FALSE
25	ABL1	0	0	0	0	0	0	0	0	0	0	0	0	0	0	0	0	0	0	FALSE
27	ABL2	0	0	0	0	0	0	0	0	0	0	0	0	0	0	0	0	0	0	FALSE
3983	ABLIM1	0	0	0	0	0	0	0	0	0	0	0	0	0	0	0	0	0	0	FALSE
84448	ABLIM2	0	0	0	0	0	0	0	0	0	0	0	0	0	0	0	0	0	0	FALSE
22885	ABLIM3	0	0	0	0	0	0	0	0	0	0	0	0	0	0	0	0	0	0	FALSE
29	ABR	0	0	0	0	0	0	0	0	0	0	0	0	0	0	0	0	0	0	FALSE
137735	ABRA	0	0	0	0	0	0	0	0	0	0	0	0	0	0	0	0	0	0	FALSE
84142	ABRAXAS1	0	0	0	0	0	0	0	0	0	0	0	0	0	0	0	0	0	0	FALSE
23172	ABRAXAS2	0	0	0	0	0	0	0	0	0	0	0	0	0	0	0	0	0	0	FALSE
29777	ABT1	0	0	0	0	0	0	0	0	0	0	0	0	0	0	0	0	0	0	FALSE
80325	ABTB1	0	0	0	0	0	0	0	0	0	0	0	0	0	0	0	0	0	0	FALSE
25841	ABTB2	0	0	0	0	0	0	0	0	0	0	0	0	0	0	0	0	0	0	FALSE
30	ACAA1	0	0	0	0	0	0	0	0	0	0	0	0	0	0	0	0	0	0	FALSE
10449	ACAA2	0	0	0	0	0	0	0	0	0	0	0	0	0	0	0	0	0	0	FALSE
31	ACACA	0	0	0	0	0	0	0	0	0	0	0	0	0	0	0	0	0	0	FALSE
32	ACACB	0	0	0	0	0	0	0	0	0	0	0	0	0	0	0	0	0	0	FALSE
80724	ACAD10	0	0	0	0	0	0	0	0	0	0	0	0	0	0	0	0	0	0	FALSE
84129	ACAD11	0	0	0	0	0	0	0	0	0	0	0	0	0	0	0	0	0	0	FALSE
27034	ACAD8	0	0	0	0	0	0	0	0	0	0	0	0	0	0	0	0	0	0	FALSE
28976	ACAD9	0	0	0	0	0	0	0	0	0	0	0	0	0	0	0	0	0	0	FALSE
33	ACADL	0	0	0	0	0	0	0	0	0	0	0	0	0	0	0	0	0	0	FALSE
34	ACADM	0	0	0	0	0	0	0	0	0	0	0	0	0	0	0	0	0	0	FALSE
35	ACADS	0	0	0	0	0	0	0	0	0	0	0	0	0	0	0	0	0	0	FALSE
36	ACADSB	0	0	0	0	0	0	0	0	0	0	0	0	0	0	0	0	0	0	FALSE
37	ACADVL	0	0	0	0	0	0	0	0	0	0	0	0	0	0	0	0	0	0	FALSE
176	ACAN	0	0	0	0	0	0	0	0	0	0	0	0	0	0	0	0	0	0	FALSE
9744	ACAP1	0	0	0	0	0	0	0	0	0	0	0	0	0	0	0	0	0	0	FALSE
23527	ACAP2	0	0	0	0	0	0	0	0	0	0	0	0	0	0	0	0	0	0	FALSE
116983	ACAP3	0	0	0	0	0	0	0	0	0	0	0	0	0	0	0	0	0	0	FALSE
38	ACAT1	0	0	0	0	0	0	0	0	0	0	0	0	0	0	0	0	0	0	FALSE
39	ACAT2	0	0	0	0	0	0	0	0	0	0	0	0	0	0	0	0	0	0	FALSE
64746	ACBD3	0	0	0	0	0	0	0	0	0	0	0	0	0	0	0	0	0	0	FALSE
79777	ACBD4	0	0	0	0	0	0	0	0	0	0	0	0	0	0	0	0	0	0	FALSE
91452	ACBD5	0	0	0	0	0	0	0	0	0	0	0	0	0	0	0	0	0	0	FALSE
84320	ACBD6	0	0	0	0	0	0	0	0	0	0	0	0	0	0	0	0	0	0	FALSE
84680	ACCS	0	0	0	0	0	0	0	0	0	0	0	0	0	0	0	0	0	0	FALSE
390110	ACCSL	0	0	0	0	0	0	0	0	0	0	0	0	0	0	0	0	0	0	FALSE
65057	ACD	0	0	0	0	0	0	0	0	0	0	0	0	0	0	0	0	0	0	FALSE
1636	ACE	0	0	0	0	0	0	0	0	0	0	0	0	0	0	0	0	0	0	FALSE
59272	ACE2	0	0	0	0	0	0	0	0	0	0	0	0	0	0	0	0	0	0	FALSE
125981	ACER1	0	0	0	0	0	0	0	0	0	0	0	0	0	0	0	0	0	0	FALSE
340485	ACER2	0	0	0	0	0	0	0	0	0	0	0	0	0	0	0	0	0	0	FALSE
55331	ACER3	0	0	0	0	0	0	0	0	0	0	0	0	0	0	0	0	0	0	FALSE
43	ACHE	0	0	0	0	0	0	0	0	0	0	0	0	0	0	0	0	0	0	FALSE
22985	ACIN1	0	0	0	0	0	0	0	0	0	0	0	0	0	0	0	0	0	0	FALSE
2532	ACKR1	0	0	0	0	0	0	0	0	0	0	0	0	0	0	0	0	0	0	FALSE
1238	ACKR2	0	0	0	0	0	0	0	0	0	0	0	0	0	0	0	0	0	0	FALSE
57007	ACKR3	0	0	0	0	0	0	0	0	0	0	0	0	0	0	0	0	0	0	FALSE
51554	ACKR4	0	0	0	0	0	0	0	0	0	0	0	0	0	0	0	0	0	0	FALSE
47	ACLY	0	0	0	0	0	0	0	0	0	0	1	0	0	1	0	0	0	2	FALSE
130013	ACMSD	0	0	0	0	0	0	0	0	0	0	0	0	0	0	0	0	0	0	FALSE
48	ACO1	0	0	0	0	0	0	0	0	0	0	0	0	0	0	0	0	0	0	FALSE
50	ACO2	0	1	0	0	0	0	0	0	0	1	0	0	0	0	0	0	0	2	FALSE
641371	ACOT1	0	0	0	0	0	0	0	0	0	0	0	0	0	0	0	0	0	0	FALSE
26027	ACOT11	0	0	0	0	0	0	0	0	0	0	0	0	0	0	0	0	0	0	FALSE
134526	ACOT12	0	0	0	0	0	0	0	0	0	0	0	0	0	0	0	0	0	0	FALSE
55856	ACOT13	0	0	0	0	0	0	0	0	0	0	0	0	0	0	0	0	0	0	FALSE
10965	ACOT2	0	0	0	0	0	0	0	0	0	0	0	0	0	0	0	0	0	0	FALSE
122970	ACOT4	0	0	0	0	0	0	0	0	0	0	0	0	0	0	0	0	0	0	FALSE
11332	ACOT7	0	0	0	0	0	0	0	0	0	0	0	0	0	0	0	0	0	0	FALSE
10005	ACOT8	0	0	0	0	0	0	0	0	0	0	0	0	0	0	0	0	0	0	FALSE
23597	ACOT9	0	0	0	0	0	0	0	0	0	0	0	0	0	0	0	0	0	0	FALSE
51	ACOX1	0	0	0	0	0	0	0	0	0	0	0	0	0	0	0	0	0	0	FALSE
8309	ACOX2	0	0	0	0	0	0	0	0	0	0	0	0	0	0	0	0	0	0	FALSE
8310	ACOX3	0	0	0	0	0	0	0	0	0	0	0	0	0	0	0	0	0	0	FALSE
55289	ACOXL	0	0	0	0	0	0	0	0	0	0	0	0	0	0	0	0	0	0	FALSE
52	ACP1	0	0	0	0	0	0	0	0	0	0	0	0	0	0	0	0	0	0	FALSE
53	ACP2	0	0	0	0	0	0	0	0	0	0	0	0	0	0	0	0	0	0	FALSE
54	ACP5	0	0	0	0	0	0	0	0	0	0	0	0	0	0	0	0	0	0	FALSE
51205	ACP6	0	0	0	0	0	0	0	0	0	0	0	0	0	0	0	0	0	0	FALSE
390928	ACP7	0	0	0	0	0	0	0	0	0	0	0	0	0	0	0	0	0	0	FALSE
55	ACPP	0	0	0	0	0	0	0	0	0	0	0	0	0	0	0	0	0	0	FALSE
49	ACR	0	0	0	0	0	0	0	0	0	0	0	0	0	0	0	0	0	0	FALSE
84519	ACRBP	0	0	0	0	0	0	0	0	0	0	0	0	0	0	0	0	0	0	FALSE
56	ACRV1	0	0	0	0	0	0	0	0	0	0	0	0	0	0	0	0	0	0	FALSE
23205	ACSBG1	0	0	0	0	0	0	0	0	0	0	0	0	0	0	0	0	0	0	FALSE
81616	ACSBG2	0	0	0	0	0	0	0	0	0	0	0	0	0	0	0	0	0	0	FALSE
80221	ACSF2	0	0	0	0	0	0	0	0	0	0	0	0	0	0	0	0	0	0	FALSE
197322	ACSF3	0	0	0	0	0	0	0	0	0	0	0	0	0	0	0	0	0	0	FALSE
2180	ACSL1	0	0	0	0	0	0	0	0	0	0	0	0	0	0	0	0	0	0	FALSE
2181	ACSL3	0	0	0	0	0	0	0	0	0	0	0	0	0	0	0	0	0	0	FALSE
2182	ACSL4	0	0	0	0	0	0	0	0	0	0	0	0	0	0	0	0	0	0	FALSE
51703	ACSL5	0	0	0	0	0	0	0	0	0	0	0	0	0	0	0	0	0	0	FALSE
23305	ACSL6	0	0	0	0	0	0	0	0	0	0	0	0	0	0	0	0	0	0	FALSE
116285	ACSM1	0	0	0	0	0	0	0	0	0	0	0	0	0	0	0	0	0	0	FALSE
348158	ACSM2B	0	0	0	0	0	0	0	0	0	0	0	0	0	0	0	0	0	0	FALSE
6296	ACSM3	0	0	0	0	0	0	0	0	0	0	0	0	0	0	0	0	0	0	FALSE
54988	ACSM5	0	0	0	0	0	0	0	0	0	0	0	0	0	0	0	0	0	0	FALSE
142827	ACSM6	0	0	0	0	0	0	0	0	0	0	0	0	0	0	0	0	0	0	FALSE
84532	ACSS1	0	0	0	0	0	0	0	0	0	0	0	0	0	0	0	0	0	0	FALSE
55902	ACSS2	0	0	0	0	0	0	0	0	0	0	0	0	0	0	0	0	0	0	FALSE
79611	ACSS3	0	0	0	0	0	0	0	0	0	0	0	0	0	0	0	0	0	0	FALSE
58	ACTA1	0	0	0	0	0	0	0	0	0	0	0	0	0	0	0	0	0	0	FALSE
59	ACTA2	0	0	0	0	0	0	0	0	0	0	0	0	0	0	0	0	0	0	FALSE
60	ACTB	0	1	0	0	1	0	0	1	1	1	0	0	0	0	1	0	0	6	FALSE
345651	ACTBL2	0	0	0	0	0	0	0	0	0	0	0	0	0	0	0	0	0	0	FALSE
70	ACTC1	0	0	0	0	0	0	0	0	0	0	0	0	0	0	0	0	0	0	FALSE
71	ACTG1	0	0	0	1	1	0	0	0	1	1	0	0	0	0	0	0	0	4	FALSE
72	ACTG2	0	0	1	1	0	0	0	0	0	1	0	0	0	0	0	0	0	3	FALSE
86	ACTL6A	1	1	1	1	1	1	1	1	1	1	1	1	1	1	1	1	1	17	TRUE
51412	ACTL6B	0	0	0	0	0	0	0	0	0	0	0	0	0	0	0	0	0	0	FALSE
10881	ACTL7A	0	0	0	0	0	0	0	0	0	0	0	0	0	0	0	0	0	0	FALSE
10880	ACTL7B	0	0	0	0	0	0	0	0	0	0	0	0	0	0	0	0	0	0	FALSE
81569	ACTL8	0	0	0	0	0	0	0	0	0	0	0	0	0	0	0	0	0	0	FALSE
284382	ACTL9	0	0	0	0	0	0	0	0	0	0	0	0	0	0	0	0	0	0	FALSE
87	ACTN1	0	0	0	0	0	0	0	0	0	0	0	0	0	0	0	0	0	0	FALSE
88	ACTN2	0	0	0	0	0	0	0	0	0	0	0	0	0	0	0	0	0	0	FALSE
81	ACTN4	0	0	0	0	0	0	0	0	0	0	0	0	0	0	0	0	0	0	FALSE
55860	ACTR10	0	1	1	0	0	0	1	0	0	1	0	0	0	1	1	0	0	6	FALSE
10121	ACTR1A	1	1	1	1	0	0	1	1	1	1	0	1	1	1	1	1	1	14	FALSE
10120	ACTR1B	0	0	0	0	0	0	0	0	0	0	0	0	0	0	0	0	0	0	FALSE
10097	ACTR2	0	0	1	0	0	0	1	0	1	1	0	1	0	1	0	0	1	7	FALSE
10096	ACTR3	0	0	0	0	0	0	0	0	0	0	0	0	0	0	0	0	0	0	FALSE
57180	ACTR3B	0	0	0	0	0	0	0	0	0	0	0	0	0	0	0	0	0	0	FALSE
79913	ACTR5	0	0	0	0	0	0	0	0	0	0	0	0	0	0	0	0	0	0	FALSE
64431	ACTR6	0	0	0	0	0	0	0	0	0	1	0	0	0	0	0	0	0	1	FALSE
93973	ACTR8	0	1	1	1	1	0	1	1	1	1	0	1	0	1	1	1	0	12	FALSE
139741	ACTRT1	0	0	0	0	0	0	0	0	0	0	0	0	0	0	0	0	0	0	FALSE
140625	ACTRT2	0	0	0	0	0	0	0	0	0	0	0	0	0	0	0	0	0	0	FALSE
84517	ACTRT3	0	0	0	0	0	0	0	0	0	0	0	0	0	0	0	0	0	0	FALSE
90	ACVR1	0	0	0	0	0	0	0	0	0	0	0	0	0	0	0	0	0	0	FALSE
91	ACVR1B	0	0	0	0	0	0	0	0	0	0	0	0	0	0	0	0	0	0	FALSE
130399	ACVR1C	0	0	0	0	0	0	0	0	0	0	0	0	0	0	0	0	0	0	FALSE
92	ACVR2A	0	0	0	0	0	0	0	0	0	0	0	0	0	0	0	0	0	0	FALSE
93	ACVR2B	0	0	0	0	0	0	0	0	0	0	0	0	0	0	0	0	0	0	FALSE
94	ACVRL1	0	0	0	0	0	0	0	0	0	0	0	0	0	0	0	0	0	0	FALSE
95	ACY1	0	0	0	0	0	0	0	0	0	0	0	0	0	0	0	0	0	0	FALSE
91703	ACY3	0	0	0	0	0	0	0	0	0	0	0	0	0	0	0	0	0	0	FALSE
97	ACYP1	0	0	0	0	0	0	0	0	0	0	0	0	0	0	0	0	0	0	FALSE
98	ACYP2	0	0	0	0	0	0	0	0	0	0	0	0	0	0	0	0	0	0	FALSE
100	ADA	0	0	0	0	0	0	0	0	0	0	0	0	0	0	0	0	0	0	FALSE
51816	ADA2	0	0	0	0	0	0	0	0	0	0	0	0	0	0	0	0	0	0	FALSE
132612	ADAD1	0	0	0	0	0	0	0	0	0	0	0	0	0	0	0	0	0	0	FALSE
161931	ADAD2	0	0	0	0	0	0	0	0	0	0	0	0	0	0	0	0	0	0	FALSE
161823	ADAL	0	0	0	0	0	0	0	0	0	0	0	0	0	0	0	0	0	0	FALSE
102	ADAM10	0	0	0	0	0	0	0	0	0	0	0	0	0	0	0	0	0	0	FALSE
4185	ADAM11	0	0	0	0	0	0	0	0	0	0	0	0	0	0	0	0	0	0	FALSE
8038	ADAM12	0	0	0	0	0	0	0	0	0	0	0	0	0	0	0	0	0	0	FALSE
8751	ADAM15	0	0	0	0	0	0	0	0	0	0	0	0	0	0	0	0	0	0	FALSE
6868	ADAM17	0	0	0	0	0	0	0	0	0	0	0	0	0	0	0	0	0	0	FALSE
8749	ADAM18	0	0	0	0	0	0	0	0	0	0	0	0	0	0	0	0	0	0	FALSE
8728	ADAM19	0	0	0	0	0	0	0	0	0	0	0	0	0	0	0	0	0	0	FALSE
2515	ADAM2	0	0	0	0	0	0	0	0	0	0	0	0	0	0	0	0	0	0	FALSE
8748	ADAM20	0	0	0	0	0	0	0	0	0	0	0	0	0	0	0	0	0	0	FALSE
8747	ADAM21	0	0	0	0	0	0	0	0	0	0	0	0	0	0	0	0	0	0	FALSE
53616	ADAM22	0	0	0	0	0	0	0	0	0	0	0	0	0	0	0	0	0	0	FALSE
8745	ADAM23	0	0	0	0	0	0	0	0	0	0	0	0	0	0	0	0	0	0	FALSE
10863	ADAM28	0	0	0	0	0	0	0	0	0	0	0	0	0	0	0	0	0	0	FALSE
11086	ADAM29	0	0	0	0	0	0	0	0	0	0	0	0	0	0	0	0	0	0	FALSE
11085	ADAM30	0	0	0	0	0	0	0	0	0	0	0	0	0	0	0	0	0	0	FALSE
203102	ADAM32	0	0	0	0	0	0	0	0	0	0	0	0	0	0	0	0	0	0	FALSE
80332	ADAM33	0	0	0	0	0	0	0	0	0	0	0	0	0	0	0	0	0	0	FALSE
8756	ADAM7	0	0	0	0	0	0	0	0	0	0	0	0	0	0	0	0	0	0	FALSE
101	ADAM8	0	0	0	0	0	0	0	0	0	0	0	0	0	0	0	0	0	0	FALSE
8754	ADAM9	0	0	0	0	0	0	0	0	0	0	0	0	0	0	0	0	0	0	FALSE
27299	ADAMDEC1	0	0	0	0	0	0	0	0	0	0	0	0	0	0	0	0	0	0	FALSE
9510	ADAMTS1	0	0	0	0	0	0	0	0	0	0	0	0	0	0	0	0	0	0	FALSE
81794	ADAMTS10	0	0	0	0	0	0	0	0	0	0	0	0	0	0	0	0	0	0	FALSE
81792	ADAMTS12	0	0	0	0	0	0	0	0	0	0	0	0	0	0	0	0	0	0	FALSE
11093	ADAMTS13	0	0	0	0	0	0	0	0	0	0	0	0	0	0	0	0	0	0	FALSE
140766	ADAMTS14	0	0	0	0	0	0	0	0	0	0	0	0	0	0	0	0	0	0	FALSE
170689	ADAMTS15	0	0	0	0	0	0	0	0	0	0	0	0	0	0	0	0	0	0	FALSE
170690	ADAMTS16	0	0	0	0	0	0	0	0	0	0	0	0	0	0	0	0	0	0	FALSE
170691	ADAMTS17	0	0	0	0	0	0	0	0	0	0	0	0	0	0	0	0	0	0	FALSE
170692	ADAMTS18	0	0	0	0	0	0	0	0	0	0	0	0	0	0	0	0	0	0	FALSE
171019	ADAMTS19	0	0	0	0	0	0	0	0	0	0	0	0	0	0	0	0	0	0	FALSE
9509	ADAMTS2	0	0	0	0	0	0	0	0	0	0	0	0	0	0	0	0	0	0	FALSE
80070	ADAMTS20	0	0	0	0	0	0	0	0	0	0	0	0	0	0	0	0	0	0	FALSE
9508	ADAMTS3	0	0	0	0	0	0	0	0	0	0	0	0	0	0	0	0	0	0	FALSE
9507	ADAMTS4	0	0	0	0	0	0	0	0	0	0	0	0	0	0	0	0	0	0	FALSE
11096	ADAMTS5	0	0	0	0	0	0	0	0	0	0	0	0	0	0	0	0	0	0	FALSE
11174	ADAMTS6	0	0	0	0	0	0	0	0	0	0	0	0	0	0	0	0	0	0	FALSE
11173	ADAMTS7	0	0	0	0	0	0	0	0	0	0	0	0	0	0	0	0	0	0	FALSE
11095	ADAMTS8	0	0	0	0	0	0	0	0	0	0	0	0	0	0	0	0	0	0	FALSE
56999	ADAMTS9	0	0	0	0	0	0	0	0	0	0	0	0	0	0	0	0	0	0	FALSE
92949	ADAMTSL1	0	0	0	0	0	0	0	0	0	0	0	0	0	0	0	0	0	0	FALSE
9719	ADAMTSL2	0	0	0	0	0	0	0	0	0	0	0	0	0	0	0	0	0	0	FALSE
57188	ADAMTSL3	0	0	0	0	0	0	0	0	0	0	0	0	0	0	0	0	0	0	FALSE
54507	ADAMTSL4	0	0	0	0	0	0	0	0	0	0	0	0	0	0	0	0	0	0	FALSE
339366	ADAMTSL5	0	0	0	0	0	0	0	0	0	0	0	0	0	0	0	0	0	0	FALSE
11033	ADAP1	0	0	0	0	0	0	0	0	0	0	0	0	0	0	0	0	0	0	FALSE
55803	ADAP2	0	0	0	0	0	0	0	0	0	0	0	0	0	0	0	0	0	0	FALSE
103	ADAR	0	0	0	0	0	0	0	0	0	0	0	0	0	0	0	0	0	0	FALSE
104	ADARB1	0	0	0	0	0	0	0	0	0	0	0	0	0	0	0	0	0	0	FALSE
105	ADARB2	0	0	0	0	0	0	0	0	0	0	0	0	0	0	0	0	0	0	FALSE
23536	ADAT1	0	0	0	0	0	0	0	0	0	0	0	0	0	0	0	0	0	0	FALSE
134637	ADAT2	0	0	0	0	0	0	0	0	0	0	0	0	0	0	0	0	0	0	FALSE
113179	ADAT3	0	0	0	0	0	0	0	0	0	0	0	0	0	0	0	0	0	0	FALSE
57143	ADCK1	0	0	0	0	0	0	0	0	0	0	0	0	0	0	0	0	0	0	FALSE
90956	ADCK2	0	0	0	0	0	0	0	0	0	0	0	0	0	0	0	0	0	0	FALSE
203054	ADCK5	0	0	0	0	0	0	0	0	0	0	0	0	0	0	0	0	0	0	FALSE
107	ADCY1	0	0	0	0	0	0	0	0	0	0	0	0	0	0	0	0	0	0	FALSE
55811	ADCY10	0	0	0	0	0	0	0	0	0	0	0	0	0	0	0	0	0	0	FALSE
108	ADCY2	0	0	0	0	0	0	0	0	0	0	0	0	0	0	0	0	0	0	FALSE
109	ADCY3	0	0	0	0	0	0	0	0	0	0	0	0	0	0	0	0	0	0	FALSE
196883	ADCY4	0	0	0	0	0	0	0	0	0	0	0	0	0	0	0	0	0	0	FALSE
111	ADCY5	0	0	0	0	0	0	0	0	0	0	0	0	0	0	0	0	0	0	FALSE
112	ADCY6	0	0	0	0	0	0	0	0	0	0	0	0	0	0	0	0	0	0	FALSE
113	ADCY7	0	0	0	0	0	0	0	0	0	0	0	0	0	0	0	0	0	0	FALSE
114	ADCY8	0	0	0	0	0	0	0	0	0	0	0	0	0	0	0	0	0	0	FALSE
115	ADCY9	0	0	0	0	0	0	0	0	0	0	0	0	0	0	0	0	0	0	FALSE
116	ADCYAP1	0	0	0	0	0	0	0	0	0	0	0	0	0	0	0	0	0	0	FALSE
117	ADCYAP1R1	0	0	0	0	0	0	0	0	0	0	0	0	0	0	0	0	0	0	FALSE
118	ADD1	0	0	0	0	0	0	0	0	0	0	0	0	0	0	0	0	0	0	FALSE
119	ADD2	0	0	0	0	0	0	0	0	0	0	0	0	0	0	0	0	0	0	FALSE
120	ADD3	0	0	0	0	0	0	0	0	0	0	0	0	0	0	0	0	0	0	FALSE
84435	ADGRA1	0	0	0	0	0	0	0	0	0	0	0	0	0	0	0	0	0	0	FALSE
25960	ADGRA2	0	0	0	0	0	0	0	0	0	0	0	0	0	0	0	0	0	0	FALSE
166647	ADGRA3	0	0	0	0	0	0	0	0	0	0	0	0	0	0	0	0	0	0	FALSE
575	ADGRB1	0	0	0	0	0	0	0	0	0	0	0	0	0	0	0	0	0	0	FALSE
576	ADGRB2	0	0	0	0	0	0	0	0	0	0	0	0	0	0	0	0	0	0	FALSE
577	ADGRB3	0	0	0	0	0	0	0	0	0	0	0	0	0	0	0	0	0	0	FALSE
283383	ADGRD1	0	0	0	0	0	0	0	0	0	0	0	0	0	0	0	0	0	0	FALSE
2015	ADGRE1	0	0	0	0	0	0	0	0	0	0	0	0	0	0	0	0	0	0	FALSE
30817	ADGRE2	0	0	0	0	0	0	0	0	0	0	0	0	0	0	0	0	0	0	FALSE
84658	ADGRE3	0	0	0	0	0	0	0	0	0	0	0	0	0	0	0	0	0	0	FALSE
976	ADGRE5	0	0	0	0	0	0	0	0	0	0	0	0	0	0	0	0	0	0	FALSE
266977	ADGRF1	0	0	0	0	0	0	0	0	0	0	0	0	0	0	0	0	0	0	FALSE
165082	ADGRF3	0	0	0	0	0	0	0	0	0	0	0	0	0	0	0	0	0	0	FALSE
221393	ADGRF4	0	0	0	0	0	0	0	0	0	0	0	0	0	0	0	0	0	0	FALSE
221395	ADGRF5	0	0	0	0	0	0	0	0	0	0	0	0	0	0	0	0	0	0	FALSE
9289	ADGRG1	0	0	0	0	0	0	0	0	0	0	0	0	0	0	0	0	0	0	FALSE
10149	ADGRG2	0	0	0	0	0	0	0	0	0	0	0	0	0	0	0	0	0	0	FALSE
222487	ADGRG3	0	0	0	0	0	0	0	0	0	0	0	0	0	0	0	0	0	0	FALSE
139378	ADGRG4	0	0	1	0	0	0	0	0	0	1	0	0	0	0	0	0	0	2	FALSE
221188	ADGRG5	0	0	0	0	0	0	0	0	0	0	0	0	0	0	0	0	0	0	FALSE
57211	ADGRG6	0	0	0	0	0	0	0	0	0	0	0	0	0	0	0	0	0	0	FALSE
84873	ADGRG7	0	0	0	0	0	0	0	0	0	0	0	0	0	0	0	0	0	0	FALSE
22859	ADGRL1	0	0	0	0	0	0	0	0	0	0	0	0	0	0	0	0	0	0	FALSE
23266	ADGRL2	0	0	0	0	0	0	0	0	0	0	0	0	0	0	0	0	0	0	FALSE
23284	ADGRL3	0	0	0	0	0	0	0	0	0	0	0	0	0	0	0	0	0	0	FALSE
64123	ADGRL4	0	0	0	0	0	0	0	0	0	0	0	0	0	0	0	0	0	0	FALSE
84059	ADGRV1	0	0	0	0	0	0	0	0	0	0	0	0	0	0	0	0	0	0	FALSE
124	ADH1A	0	0	0	0	0	0	0	0	0	0	0	0	0	0	0	0	0	0	FALSE
125	ADH1B	0	0	0	0	0	0	0	0	0	0	0	0	0	0	0	0	0	0	FALSE
127	ADH4	0	0	0	0	0	0	0	0	0	0	0	0	0	0	0	0	0	0	FALSE
128	ADH5	0	0	0	0	0	0	0	0	0	0	0	0	0	0	0	0	0	0	FALSE
130	ADH6	0	0	0	0	0	0	0	0	0	0	0	0	0	0	0	0	0	0	FALSE
137872	ADHFE1	0	0	0	0	0	0	0	0	0	0	0	0	0	0	0	0	0	0	FALSE
55256	ADI1	0	0	0	0	0	0	0	0	0	0	0	0	0	0	0	0	0	0	FALSE
149685	ADIG	0	0	0	0	0	0	0	0	0	0	0	0	0	0	0	0	0	0	FALSE
9370	ADIPOQ	0	0	0	0	0	0	0	0	0	0	0	0	0	0	0	0	0	0	FALSE
51094	ADIPOR1	0	0	0	0	0	0	0	0	0	0	0	0	0	0	0	0	0	0	FALSE
79602	ADIPOR2	0	0	0	0	0	0	0	0	0	0	0	0	0	0	0	0	0	0	FALSE
10974	ADIRF	0	0	0	0	0	0	0	0	0	0	0	0	0	0	0	0	0	0	FALSE
132	ADK	0	0	0	0	0	0	0	0	0	0	0	0	0	0	0	0	0	0	FALSE
133	ADM	0	0	0	0	0	0	0	0	0	0	0	0	0	0	0	0	0	0	FALSE
79924	ADM2	0	0	0	0	0	0	0	0	0	0	0	0	0	0	0	0	0	0	FALSE
23394	ADNP	0	0	0	0	0	0	0	0	0	0	0	0	0	0	0	0	0	0	FALSE
22850	ADNP2	0	0	0	0	0	0	0	0	0	0	0	0	0	0	0	0	0	0	FALSE
134	ADORA1	0	0	0	0	0	0	0	0	0	0	0	0	0	0	0	0	0	0	FALSE
135	ADORA2A	0	0	0	0	0	0	0	0	0	0	0	0	0	0	0	0	0	0	FALSE
136	ADORA2B	0	0	0	0	0	0	0	0	0	0	0	0	0	0	0	0	0	0	FALSE
83440	ADPGK	0	0	0	0	0	0	0	0	0	0	0	0	0	0	0	0	0	0	FALSE
141	ADPRH	0	0	0	0	0	0	0	0	0	0	0	0	0	0	0	0	0	0	FALSE
113622	ADPRHL1	0	0	0	0	0	0	0	0	0	0	0	0	0	0	0	0	0	0	FALSE
54936	ADPRHL2	0	0	0	0	0	0	0	0	0	0	0	0	0	0	0	0	0	0	FALSE
56985	ADPRM	0	0	0	0	0	0	0	0	0	0	0	0	0	0	0	0	0	0	FALSE
148	ADRA1A	0	0	0	0	0	0	0	0	0	0	0	0	0	0	0	0	0	0	FALSE
147	ADRA1B	0	0	0	0	0	0	0	0	0	0	0	0	0	0	0	0	0	0	FALSE
146	ADRA1D	0	0	0	0	0	0	0	0	0	0	0	0	0	0	0	0	0	0	FALSE
150	ADRA2A	0	0	0	0	0	0	0	0	0	0	0	0	0	0	0	0	0	0	FALSE
151	ADRA2B	0	0	0	0	0	0	0	0	0	0	0	0	0	0	0	0	0	0	FALSE
152	ADRA2C	0	0	0	0	0	0	0	0	0	0	0	0	0	0	0	0	0	0	FALSE
153	ADRB1	0	0	0	0	0	0	0	0	0	0	0	0	0	0	0	0	0	0	FALSE
154	ADRB2	0	0	0	0	0	0	0	0	0	0	0	0	0	0	0	0	0	0	FALSE
155	ADRB3	0	0	0	0	0	0	0	0	0	0	0	0	0	0	0	0	0	0	FALSE
11047	ADRM1	0	0	0	0	0	0	0	0	0	0	0	0	0	0	0	0	0	0	FALSE
158	ADSL	0	1	0	1	0	0	0	0	0	1	1	0	1	0	0	0	0	5	FALSE
159	ADSS	0	0	0	0	0	0	0	0	0	0	0	0	0	0	0	0	0	0	FALSE
122622	ADSSL1	0	0	0	0	0	0	0	0	0	0	0	0	0	0	0	0	0	0	FALSE
84830	ADTRP	0	0	0	0	0	0	0	0	0	0	0	0	0	0	0	0	0	0	FALSE
165	AEBP1	0	0	0	0	0	0	0	0	0	0	0	0	0	0	0	0	0	0	FALSE
121536	AEBP2	0	0	0	0	0	0	0	0	0	0	0	0	0	0	0	0	0	0	FALSE
64782	AEN	0	0	0	0	0	0	0	0	0	0	0	0	0	0	0	0	0	0	FALSE
166	TLE5	0	0	0	0	0	0	0	0	0	0	0	0	0	0	0	0	0	0	FALSE
60312	AFAP1	0	0	0	0	0	0	0	0	0	0	0	0	0	0	0	0	0	0	FALSE
4301	AFDN	0	0	0	0	0	0	0	0	0	0	0	0	0	0	0	0	0	0	FALSE
4299	AFF1	0	0	0	0	0	0	0	0	0	0	0	0	0	0	0	0	0	0	FALSE
2334	AFF2	0	0	0	0	0	0	0	0	0	0	0	0	0	0	0	0	0	0	FALSE
3899	AFF3	0	0	0	0	0	0	0	0	0	0	0	0	0	0	0	0	0	0	FALSE
27125	AFF4	0	0	0	0	0	0	0	0	0	0	0	0	0	0	0	0	0	0	FALSE
246269	AFG1L	0	0	0	0	0	0	0	0	0	0	0	0	0	0	0	0	0	0	FALSE
10939	AFG3L2	1	1	1	1	1	1	1	1	1	1	1	1	1	1	1	1	1	17	TRUE
173	AFM	0	0	0	0	0	0	0	0	0	0	0	0	0	0	0	0	0	0	FALSE
125061	AFMID	0	0	0	0	0	0	0	0	0	0	0	0	0	0	0	0	0	0	FALSE
174	AFP	0	0	0	0	0	0	0	0	0	0	0	0	0	0	0	0	0	0	FALSE
54812	AFTPH	0	0	0	0	0	0	0	0	0	0	0	0	0	0	0	0	0	0	FALSE
175	AGA	0	0	0	0	0	0	0	0	0	0	0	0	0	0	0	0	0	0	FALSE
116987	AGAP1	0	0	0	0	0	0	0	0	0	0	0	0	0	0	0	0	0	0	FALSE
116986	AGAP2	0	0	0	0	0	0	0	0	0	0	0	0	0	0	0	0	0	0	FALSE
116988	AGAP3	0	0	0	0	0	0	0	0	0	0	0	0	0	0	0	0	0	0	FALSE
119016	AGAP4	0	0	0	0	0	0	0	0	0	0	0	0	0	0	0	0	0	0	FALSE
729092	AGAP5	0	0	0	0	0	0	0	0	0	0	0	0	0	0	0	0	0	0	FALSE
414189	AGAP6	0	0	0	0	0	0	0	0	0	0	0	0	0	0	0	0	0	0	FALSE
642517	AGAP9	0	0	0	0	0	0	0	0	0	0	0	0	0	0	0	0	0	0	FALSE
79841	AGBL2	0	0	0	0	0	0	0	0	0	0	0	0	0	0	0	0	0	0	FALSE
340351	AGBL3	0	0	0	0	0	0	0	0	0	0	0	0	0	0	0	0	0	0	FALSE
60509	AGBL5	0	0	0	0	0	0	0	0	0	0	0	0	0	0	0	0	0	0	FALSE
177	AGER	0	0	0	0	0	0	0	0	0	0	0	0	0	0	0	0	0	0	FALSE
3267	AGFG1	0	0	0	0	0	0	0	0	0	0	0	0	0	0	0	0	0	0	FALSE
3268	AGFG2	0	0	0	0	0	0	0	0	0	0	0	0	0	0	0	0	0	0	FALSE
55109	AGGF1	0	0	0	0	0	0	0	0	0	0	0	0	0	0	0	0	0	0	FALSE
55750	AGK	0	0	0	0	0	0	0	0	0	0	0	0	0	0	0	0	0	0	FALSE
178	AGL	0	0	0	0	0	0	0	0	0	0	0	0	0	0	0	0	0	0	FALSE
79814	AGMAT	0	0	0	0	0	0	0	0	0	0	0	0	0	0	0	0	0	0	FALSE
392636	AGMO	0	0	0	0	0	0	0	0	0	0	0	0	0	0	0	0	0	0	FALSE
26523	AGO1	0	0	0	0	0	0	0	0	0	0	0	0	0	0	0	0	0	0	FALSE
27161	AGO2	0	0	0	0	0	0	0	0	0	0	0	0	0	0	0	0	0	0	FALSE
192669	AGO3	0	0	0	0	0	0	0	0	0	0	0	0	0	0	0	0	0	0	FALSE
192670	AGO4	0	0	0	0	0	0	0	0	0	0	0	0	0	0	0	0	0	0	FALSE
10554	AGPAT1	0	0	0	0	0	0	0	0	0	0	0	0	0	0	0	0	0	0	FALSE
10555	AGPAT2	0	0	0	0	0	0	0	0	0	0	0	0	0	0	0	0	0	0	FALSE
56894	AGPAT3	0	0	0	0	0	0	0	0	0	0	0	0	0	0	0	0	0	0	FALSE
56895	AGPAT4	0	0	0	0	0	0	0	0	0	0	0	0	0	0	0	0	0	0	FALSE
55326	AGPAT5	0	0	0	0	0	0	0	0	0	0	0	0	0	0	0	0	0	0	FALSE
8540	AGPS	0	0	0	0	0	0	0	0	0	0	0	0	0	0	0	0	0	0	FALSE
10551	AGR2	0	0	0	0	0	0	0	0	0	0	0	0	0	0	0	0	0	0	FALSE
155465	AGR3	0	0	0	0	0	0	0	0	0	0	0	0	0	0	0	0	0	0	FALSE
375790	AGRN	0	0	0	0	0	0	0	0	0	0	0	0	0	0	0	0	0	0	FALSE
181	AGRP	0	0	0	0	0	0	0	0	0	0	0	0	0	0	0	0	0	0	FALSE
183	AGT	0	0	0	0	0	0	0	0	0	0	0	0	0	0	0	0	0	0	FALSE
23287	AGTPBP1	0	0	0	0	0	0	0	0	0	0	0	0	0	0	0	0	0	0	FALSE
185	AGTR1	0	0	0	0	0	0	0	0	0	0	0	0	0	0	0	0	0	0	FALSE
186	AGTR2	0	0	0	0	0	0	0	0	0	0	0	0	0	0	0	0	0	0	FALSE
57085	AGTRAP	0	0	0	0	0	0	0	0	0	0	0	0	0	0	0	0	0	0	FALSE
189	AGXT	0	0	0	0	0	0	0	0	0	0	0	0	0	0	0	0	0	0	FALSE
64902	AGXT2	0	0	0	0	0	0	0	0	0	0	0	0	0	0	0	0	0	0	FALSE
25909	AHCTF1	1	1	1	1	1	1	1	1	1	1	1	1	1	1	1	1	1	17	TRUE
191	AHCY	0	0	0	0	0	0	0	0	0	0	0	0	0	0	0	0	0	0	FALSE
10768	AHCYL1	0	0	0	0	0	0	0	0	0	0	0	0	0	0	0	0	0	0	FALSE
23382	AHCYL2	0	0	0	0	0	0	0	0	0	0	0	0	0	0	0	0	0	0	FALSE
54806	AHI1	0	0	0	0	0	0	0	0	0	0	0	0	0	0	0	0	0	0	FALSE
79026	AHNAK	0	0	0	0	0	0	0	0	0	0	0	0	0	0	0	0	0	0	FALSE
196	AHR	0	0	0	0	0	0	0	0	0	0	0	0	0	0	0	0	0	0	FALSE
57491	AHRR	0	0	0	0	0	0	0	0	0	0	0	0	0	0	0	0	0	0	FALSE
10598	AHSA1	0	0	0	0	0	0	0	0	0	0	0	0	0	0	0	0	0	0	FALSE
197	AHSG	0	0	0	0	0	0	0	0	0	0	0	0	0	0	0	0	0	0	FALSE
51327	AHSP	0	0	0	0	0	0	0	0	0	0	0	0	0	0	0	0	0	0	FALSE
57379	AICDA	0	0	0	0	0	0	0	0	0	0	0	0	0	0	0	0	0	0	FALSE
64853	AIDA	0	0	0	0	0	0	0	0	0	0	0	0	0	0	0	0	0	0	FALSE
199	AIF1	0	0	0	0	0	0	0	0	0	0	0	0	0	0	0	0	0	0	FALSE
83543	AIF1L	0	0	0	0	0	0	0	0	0	0	0	0	0	0	0	0	0	0	FALSE
9131	AIFM1	0	0	0	0	0	0	0	0	0	1	0	0	0	0	0	0	0	1	FALSE
84883	AIFM2	0	0	0	0	0	0	0	0	0	0	0	0	0	0	0	0	0	0	FALSE
150209	AIFM3	0	0	0	0	0	0	0	0	0	0	0	0	0	0	0	0	0	0	FALSE
51390	AIG1	0	0	0	0	0	0	0	0	0	0	0	0	0	0	0	0	0	0	FALSE
9447	AIM2	0	0	0	0	0	0	0	0	0	0	0	0	0	0	0	0	0	0	FALSE
9255	AIMP1	0	0	0	0	0	0	0	0	0	0	0	0	0	0	0	0	0	0	FALSE
7965	AIMP2	0	0	0	0	0	0	0	0	0	0	0	0	0	0	0	0	0	0	FALSE
9049	AIP	0	0	0	0	0	0	0	0	0	0	0	0	0	0	0	0	0	0	FALSE
23746	AIPL1	0	0	0	0	0	0	0	0	0	0	0	0	0	0	0	0	0	0	FALSE
326	AIRE	0	0	0	0	0	0	0	0	0	0	0	0	0	0	0	0	0	0	FALSE
55966	AJAP1	0	0	0	0	0	0	0	0	0	0	0	0	0	0	0	0	0	0	FALSE
84962	AJUBA	0	0	0	0	0	0	0	0	0	0	0	0	0	0	0	0	0	0	FALSE
203	AK1	0	0	0	0	0	0	0	0	0	0	0	0	0	0	0	0	0	0	FALSE
204	AK2	0	0	0	0	0	0	0	0	0	0	0	0	0	0	0	0	0	0	FALSE
50808	AK3	0	0	0	0	0	0	0	0	0	0	0	0	0	0	0	0	0	0	FALSE
205	AK4	0	0	0	0	0	0	0	0	0	0	0	0	0	0	0	0	0	0	FALSE
26289	AK5	0	0	0	0	0	0	0	0	0	0	0	0	0	0	0	0	0	0	FALSE
122481	AK7	0	0	0	0	0	0	0	0	0	0	0	0	0	0	0	0	0	0	FALSE
158067	AK8	0	0	0	0	0	0	0	0	0	0	0	0	0	0	0	0	0	0	FALSE
221264	AK9	0	0	0	0	0	0	0	0	0	0	0	0	0	0	0	0	0	0	FALSE
8165	AKAP1	0	0	0	0	0	0	0	0	0	0	0	0	0	0	0	0	0	0	FALSE
11216	AKAP10	0	0	0	0	0	0	0	0	0	0	0	0	0	0	0	0	0	0	FALSE
11215	AKAP11	0	0	0	0	0	0	0	0	0	0	0	0	0	0	0	0	0	0	FALSE
9590	AKAP12	0	0	0	0	0	0	0	0	0	0	0	0	0	0	0	0	0	0	FALSE
11214	AKAP13	0	0	0	0	0	0	0	0	0	0	0	0	0	0	0	0	0	0	FALSE
158798	AKAP14	0	0	0	0	0	0	0	0	0	0	0	0	0	0	0	0	0	0	FALSE
8227	AKAP17A	0	0	0	0	0	0	0	0	0	0	0	0	0	0	0	0	0	0	FALSE
11217	AKAP2	0	0	0	0	0	0	0	0	0	0	0	0	0	0	0	0	0	0	FALSE
10566	AKAP3	0	0	0	0	0	0	0	0	0	0	0	0	0	0	0	0	0	0	FALSE
9495	AKAP5	0	0	0	0	0	0	0	0	0	0	0	0	0	0	0	0	0	0	FALSE
9472	AKAP6	0	0	0	0	0	0	0	0	0	0	0	0	0	0	0	0	0	0	FALSE
9465	AKAP7	0	0	0	0	0	0	0	0	0	0	0	0	0	0	0	0	0	0	FALSE
10270	AKAP8	0	0	0	0	0	0	0	0	0	0	0	0	0	0	0	0	0	0	FALSE
26993	AKAP8L	0	0	0	0	0	0	0	0	0	0	0	0	0	0	0	0	0	0	FALSE
10142	AKAP9	0	0	0	0	0	0	0	0	0	0	0	0	0	0	0	0	0	0	FALSE
56672	AKIP1	0	0	0	0	0	0	0	0	0	0	0	0	0	0	0	0	0	0	FALSE
79647	AKIRIN1	0	0	0	0	0	0	0	0	0	0	0	0	0	0	0	0	0	0	FALSE
80709	AKNA	0	0	0	0	0	0	0	0	0	0	0	0	0	0	0	0	0	0	FALSE
10327	AKR1A1	0	0	0	0	0	0	0	0	0	0	0	0	0	0	0	0	0	0	FALSE
231	AKR1B1	0	0	0	0	0	0	0	0	0	0	0	0	0	0	0	0	0	0	FALSE
57016	AKR1B10	0	0	0	0	0	0	0	0	0	0	0	0	0	0	0	0	0	0	FALSE
441282	AKR1B15	0	0	0	0	0	0	0	0	0	0	0	0	0	0	0	0	0	0	FALSE
1645	AKR1C1	0	0	0	0	0	0	0	0	0	0	0	0	0	0	0	0	0	0	FALSE
1646	AKR1C2	0	0	0	0	0	0	0	0	0	0	0	0	0	0	0	0	0	0	FALSE
8644	AKR1C3	0	0	0	0	0	0	0	0	0	0	0	0	0	0	0	0	0	0	FALSE
1109	AKR1C4	0	0	0	0	0	0	0	0	0	0	0	0	0	0	0	0	0	0	FALSE
6718	AKR1D1	0	0	0	0	0	0	0	0	0	0	0	0	0	0	0	0	0	0	FALSE
83592	AKR1E2	0	0	0	0	0	0	0	0	0	0	0	0	0	0	0	0	0	0	FALSE
8574	AKR7A2	0	0	0	0	0	0	0	0	0	0	0	0	0	0	0	0	0	0	FALSE
22977	AKR7A3	0	0	0	0	0	0	0	0	0	0	0	0	0	0	0	0	0	0	FALSE
246181	AKR7L	0	0	0	0	0	0	0	0	0	0	0	0	0	0	0	0	0	0	FALSE
207	AKT1	0	0	0	0	0	0	0	0	0	0	0	0	0	0	0	0	0	0	FALSE
84335	AKT1S1	0	0	0	0	0	0	0	0	0	0	0	0	0	0	0	0	0	0	FALSE
208	AKT2	0	0	0	0	0	0	0	0	0	0	0	0	0	0	0	0	0	0	FALSE
10000	AKT3	0	0	0	0	0	0	0	0	0	0	0	0	0	0	0	0	0	0	FALSE
64400	AKTIP	0	0	0	0	0	0	0	0	0	0	0	0	0	0	0	0	0	0	FALSE
210	ALAD	0	0	0	0	0	0	0	0	0	0	0	0	0	0	0	0	0	0	FALSE
211	ALAS1	0	0	0	0	0	0	0	0	0	0	0	0	0	0	0	0	0	0	FALSE
212	ALAS2	0	0	0	0	0	0	0	0	0	0	0	0	0	0	0	0	0	0	FALSE
213	ALB	0	0	0	0	0	0	0	0	0	0	0	0	0	0	0	0	0	0	FALSE
214	ALCAM	0	0	0	0	0	0	0	0	0	0	0	0	0	0	0	0	0	0	FALSE
126133	ALDH16A1	0	0	0	0	0	0	0	0	0	0	0	0	0	0	0	0	0	0	FALSE
5832	ALDH18A1	0	0	0	0	0	0	0	0	0	0	0	0	0	0	0	0	0	0	FALSE
216	ALDH1A1	0	0	0	0	0	0	0	0	0	0	0	0	0	0	0	0	0	0	FALSE
8854	ALDH1A2	0	0	0	0	0	0	0	0	0	0	0	0	0	0	0	0	0	0	FALSE
220	ALDH1A3	0	0	0	0	0	0	0	0	0	0	0	0	0	0	0	0	0	0	FALSE
219	ALDH1B1	0	0	0	0	0	0	0	0	0	0	0	0	0	0	0	0	0	0	FALSE
10840	ALDH1L1	0	0	0	0	0	0	0	0	0	0	0	0	0	0	0	0	0	0	FALSE
160428	ALDH1L2	0	0	0	0	0	0	0	0	0	0	0	0	0	0	0	0	0	0	FALSE
217	ALDH2	0	0	0	0	0	0	0	0	0	0	0	0	0	0	0	0	0	0	FALSE
218	ALDH3A1	0	0	0	0	0	0	0	0	0	0	0	0	0	0	0	0	0	0	FALSE
222	ALDH3B2	0	0	0	0	0	0	0	0	0	0	0	0	0	0	0	0	0	0	FALSE
8659	ALDH4A1	0	0	0	0	0	0	0	0	0	0	0	0	0	0	0	0	0	0	FALSE
7915	ALDH5A1	0	0	0	0	0	0	0	0	0	0	0	0	0	0	0	0	0	0	FALSE
501	ALDH7A1	0	0	0	0	0	0	0	0	0	0	0	0	0	0	0	0	0	0	FALSE
64577	ALDH8A1	0	0	0	0	0	0	0	0	0	0	0	0	0	0	0	0	0	0	FALSE
223	ALDH9A1	0	0	0	0	0	0	0	0	0	0	0	0	0	0	0	0	0	0	FALSE
226	ALDOA	1	1	1	1	1	1	1	1	1	1	1	1	1	1	1	1	1	17	TRUE
229	ALDOB	0	0	0	0	0	0	0	0	0	0	0	0	0	0	0	0	0	0	FALSE
230	ALDOC	0	0	0	0	0	0	0	0	0	0	0	0	0	0	0	0	0	0	FALSE
56052	ALG1	0	0	0	0	0	0	0	0	0	0	0	0	0	0	0	0	0	0	FALSE
84920	ALG10	0	0	0	0	0	0	0	0	0	0	0	0	0	0	0	0	0	0	FALSE
144245	ALG10B	0	0	0	0	0	0	0	0	0	0	0	0	0	0	0	0	0	0	FALSE
440138	ALG11	0	0	1	1	0	0	0	1	0	1	0	1	1	0	0	1	0	7	FALSE
79087	ALG12	0	0	0	0	0	0	0	0	0	0	0	0	0	0	0	0	0	0	FALSE
79868	ALG13	0	0	0	0	0	0	0	0	1	0	0	0	0	0	0	0	0	1	FALSE
200810	ALG1L	0	0	0	0	0	0	0	0	0	0	0	0	0	0	0	0	0	0	FALSE
85365	ALG2	0	0	0	0	0	0	0	0	0	0	0	0	0	0	0	0	0	0	FALSE
10195	ALG3	0	0	0	0	0	0	0	0	0	0	0	0	0	0	0	0	0	0	FALSE
29880	ALG5	0	0	0	0	0	0	0	0	0	0	0	0	0	0	0	0	0	0	FALSE
29929	ALG6	0	0	0	0	0	0	0	0	0	0	0	0	0	0	0	0	0	0	FALSE
79053	ALG8	0	0	0	0	0	0	0	0	0	0	0	0	0	0	0	0	0	0	FALSE
79796	ALG9	0	0	0	0	0	0	0	0	0	0	0	0	0	0	0	0	0	0	FALSE
238	ALK	0	0	0	0	0	0	0	0	0	0	0	0	0	0	0	0	0	0	FALSE
389658	ALKAL1	0	0	0	0	0	0	0	0	0	0	0	0	0	0	0	0	0	0	FALSE
8846	ALKBH1	0	0	0	0	0	0	0	0	0	0	0	0	0	0	0	0	0	0	FALSE
121642	ALKBH2	0	0	0	0	0	0	0	0	0	0	0	0	0	0	0	0	0	0	FALSE
221120	ALKBH3	0	0	0	0	0	0	0	0	0	0	0	0	0	0	0	0	0	0	FALSE
54784	ALKBH4	0	0	0	0	0	0	0	0	0	0	0	0	0	0	0	0	0	0	FALSE
54890	ALKBH5	0	0	0	0	0	0	0	0	0	0	0	0	0	0	0	0	0	0	FALSE
84266	ALKBH7	0	0	0	0	0	0	0	0	0	0	0	0	0	0	0	0	0	0	FALSE
91801	ALKBH8	0	0	0	0	0	0	0	0	0	0	0	0	0	0	0	0	0	0	FALSE
55821	ALLC	0	0	0	0	0	0	0	0	0	0	0	0	0	0	0	0	0	0	FALSE
7840	ALMS1	0	0	0	0	0	0	0	0	0	0	0	0	0	0	0	0	0	0	FALSE
239	ALOX12	0	0	0	0	0	0	0	0	0	0	0	0	0	0	0	0	0	0	FALSE
242	ALOX12B	0	0	0	0	0	0	0	0	0	0	0	0	0	0	0	0	0	0	FALSE
246	ALOX15	0	0	0	0	0	0	0	0	0	0	0	0	0	0	0	0	0	0	FALSE
247	ALOX15B	0	0	0	0	0	0	0	0	0	0	0	0	0	0	0	0	0	0	FALSE
240	ALOX5	0	0	0	0	0	0	0	0	0	0	0	0	0	0	0	0	0	0	FALSE
241	ALOX5AP	0	0	0	0	0	0	0	0	0	0	0	0	0	0	0	0	0	0	FALSE
59344	ALOXE3	0	0	0	0	0	0	0	0	0	0	0	0	0	0	0	0	0	0	FALSE
251	ALPG	0	0	0	0	0	0	0	0	0	0	0	0	0	0	0	0	0	0	FALSE
248	ALPI	0	0	0	0	0	0	0	0	0	0	0	0	0	0	0	0	0	0	FALSE
80216	ALPK1	0	0	0	0	0	0	0	0	0	0	0	0	0	0	0	0	0	0	FALSE
115701	ALPK2	0	0	0	0	0	0	0	0	0	0	0	0	0	0	0	0	0	0	FALSE
57538	ALPK3	0	0	0	0	0	0	0	0	0	0	0	0	0	0	0	0	0	0	FALSE
249	ALPL	0	0	0	0	0	0	0	0	0	0	0	0	0	0	0	0	0	0	FALSE
250	ALPP	0	0	0	0	0	0	0	0	0	0	0	0	0	0	0	0	0	0	FALSE
57679	ALS2	0	0	0	0	0	0	0	0	0	0	0	0	0	0	0	0	0	0	FALSE
259173	ALS2CL	0	0	0	0	0	0	0	0	0	0	0	0	0	0	0	0	0	0	FALSE
130540	FLACC1	0	0	0	0	0	0	0	0	0	0	0	0	0	0	0	0	0	0	FALSE
8092	ALX1	0	0	0	0	0	0	0	0	0	0	0	0	0	0	0	0	0	0	FALSE
257	ALX3	0	0	0	0	0	0	0	0	0	0	0	0	0	0	0	0	0	0	FALSE
60529	ALX4	0	0	0	0	0	0	0	0	0	0	0	0	0	0	0	0	0	0	FALSE
10189	ALYREF	1	1	1	1	1	1	1	1	1	1	1	1	1	1	1	1	1	17	TRUE
23600	AMACR	0	0	0	0	0	0	0	0	0	0	0	0	0	0	0	0	0	0	FALSE
258	AMBN	0	0	0	0	0	0	0	0	0	0	0	0	0	0	0	0	0	0	FALSE
259	AMBP	0	0	0	0	0	0	0	0	0	0	0	0	0	0	0	0	0	0	FALSE
55626	AMBRA1	0	0	0	0	0	0	0	0	0	0	0	0	0	0	0	0	0	0	FALSE
262	AMD1	0	0	0	0	0	0	0	0	0	0	0	0	0	0	0	0	0	0	FALSE
144193	AMDHD1	0	0	0	0	0	0	0	0	0	0	0	0	0	0	0	0	0	0	FALSE
51005	AMDHD2	0	0	0	0	0	0	0	0	0	0	0	0	0	0	0	0	0	0	FALSE
265	AMELX	0	0	0	0	0	0	0	0	0	0	0	0	0	0	0	0	0	0	FALSE
139285	AMER1	0	0	0	0	0	0	0	0	0	1	0	0	0	0	0	0	0	1	FALSE
205147	AMER3	0	0	0	0	0	0	0	0	0	0	0	0	0	0	0	0	0	0	FALSE
267	AMFR	0	0	0	0	0	0	0	0	0	0	0	0	0	0	0	0	0	0	FALSE
268	AMH	0	0	0	0	0	0	0	0	0	0	0	0	0	0	0	0	0	0	FALSE
269	AMHR2	0	0	0	0	0	0	0	0	0	0	0	0	0	0	0	0	0	0	FALSE
57463	AMIGO1	0	0	0	0	0	0	0	0	0	0	0	0	0	0	0	0	0	0	FALSE
347902	AMIGO2	0	0	0	0	0	0	0	0	0	0	0	0	0	0	0	0	0	0	FALSE
386724	AMIGO3	0	0	0	0	0	0	0	0	0	0	0	0	0	0	0	0	0	0	FALSE
9949	AMMECR1	0	0	0	0	0	0	0	0	0	0	0	0	0	0	0	0	0	0	FALSE
81693	AMN	0	0	0	0	0	0	0	0	0	0	0	0	0	0	0	0	0	0	FALSE
196394	AMN1	0	0	0	0	0	0	0	0	0	0	0	0	0	0	0	0	0	0	FALSE
154796	AMOT	0	0	0	0	0	0	0	0	0	0	0	0	0	0	0	0	0	0	FALSE
154810	AMOTL1	0	0	0	0	0	0	0	0	0	0	0	0	0	0	0	0	0	0	FALSE
51421	AMOTL2	0	0	0	0	0	0	0	0	0	0	0	0	0	0	0	0	0	0	FALSE
270	AMPD1	0	0	0	0	0	0	0	0	0	0	0	0	0	0	0	0	0	0	FALSE
271	AMPD2	0	0	0	0	0	0	0	0	0	0	0	0	0	0	0	0	0	0	FALSE
272	AMPD3	0	0	0	0	0	0	0	0	0	0	0	0	0	0	0	0	0	0	FALSE
273	AMPH	0	0	0	0	0	0	0	0	0	0	0	0	0	0	0	0	0	0	FALSE
275	AMT	0	0	0	0	0	0	0	0	0	0	0	0	0	0	0	0	0	0	FALSE
401138	AMTN	0	0	0	0	0	0	0	0	0	0	0	0	0	0	0	0	0	0	FALSE
279	AMY2A	0	0	0	0	0	0	0	0	0	0	0	0	0	0	0	0	0	0	FALSE
280	AMY2B	0	0	0	0	0	0	0	0	0	0	0	0	0	0	0	0	0	0	FALSE
155185	AMZ1	0	0	0	0	0	0	0	0	0	0	0	0	0	0	0	0	0	0	FALSE
51321	AMZ2	0	0	0	0	0	0	0	0	0	0	0	0	0	0	0	0	0	0	FALSE
64682	ANAPC1	1	1	1	1	1	1	1	1	1	1	0	1	1	1	1	1	1	16	TRUE
10393	ANAPC10	0	0	0	0	0	0	0	0	0	0	0	0	0	0	0	0	0	0	FALSE
51529	ANAPC11	0	0	0	0	0	0	0	0	0	0	0	0	0	0	0	0	0	0	FALSE
25906	ANAPC15	0	0	0	0	0	0	0	0	0	1	0	0	0	0	0	0	0	1	FALSE
29882	ANAPC2	0	0	0	0	0	0	0	0	0	1	0	0	0	0	0	0	0	1	FALSE
29945	ANAPC4	1	1	1	1	1	1	1	1	1	1	1	1	1	1	1	1	1	17	TRUE
51433	ANAPC5	1	1	1	1	1	1	1	1	1	1	1	1	1	1	1	1	1	17	TRUE
51434	ANAPC7	0	0	0	0	0	0	0	0	0	0	0	0	0	0	0	0	0	0	FALSE
283	ANG	0	0	0	0	0	0	0	0	0	0	0	0	0	0	0	0	0	0	FALSE
23357	ANGEL1	0	0	0	0	0	0	0	0	0	0	0	0	0	0	0	0	0	0	FALSE
90806	ANGEL2	0	0	0	0	0	0	0	0	0	0	0	0	0	0	0	0	0	0	FALSE
285	ANGPT2	0	0	0	0	0	0	0	0	0	0	0	0	0	0	0	0	0	0	FALSE
51378	ANGPT4	0	0	0	0	0	0	0	0	0	0	0	0	0	0	0	0	0	0	FALSE
9068	ANGPTL1	0	0	0	0	0	0	0	0	0	0	0	0	0	0	0	0	0	0	FALSE
23452	ANGPTL2	0	0	0	0	0	0	0	0	0	0	0	0	0	0	0	0	0	0	FALSE
51129	ANGPTL4	0	0	0	0	0	0	0	0	0	0	0	0	0	0	0	0	0	0	FALSE
253935	ANGPTL5	0	0	0	0	0	0	0	0	0	0	0	0	0	0	0	0	0	0	FALSE
83854	ANGPTL6	0	0	0	0	0	0	0	0	0	0	0	0	0	0	0	0	0	0	FALSE
10218	ANGPTL7	0	0	0	0	0	0	0	0	0	0	0	0	0	0	0	0	0	0	FALSE
55908	ANGPTL8	0	0	0	0	0	0	0	0	0	0	0	0	0	0	0	0	0	0	FALSE
286	ANK1	0	0	0	0	0	0	0	0	0	0	0	0	0	0	0	0	0	0	FALSE
287	ANK2	0	0	0	0	0	0	0	0	0	0	0	0	0	0	0	0	0	0	FALSE
288	ANK3	0	0	0	0	0	0	0	0	0	0	0	0	0	0	0	0	0	0	FALSE
150709	ANKAR	0	0	0	0	0	0	0	0	0	0	0	0	0	0	0	0	0	0	FALSE
63926	ANKEF1	0	0	0	0	0	0	0	0	0	0	0	0	0	0	0	0	0	0	FALSE
162282	ANKFN1	0	0	0	0	0	0	0	0	0	0	0	0	0	0	0	0	0	0	FALSE
51479	ANKFY1	0	0	0	0	0	0	0	0	0	0	0	0	0	0	0	0	0	0	FALSE
56172	ANKH	0	0	0	0	0	0	0	0	0	0	0	0	0	0	0	0	0	0	FALSE
54882	ANKHD1	0	0	0	0	0	0	0	0	0	0	0	0	0	0	0	0	0	0	FALSE
54467	ANKIB1	0	0	0	0	0	0	0	0	0	0	0	0	0	0	0	0	0	0	FALSE
255239	ANKK1	0	0	0	0	0	0	0	0	0	0	0	0	0	0	0	0	0	0	FALSE
126549	ANKLE1	0	0	0	0	0	0	0	0	0	0	0	0	0	0	0	0	0	0	FALSE
23141	ANKLE2	0	0	1	0	0	0	0	1	0	1	1	1	0	0	0	0	0	5	FALSE
51281	ANKMY1	0	0	0	0	0	0	0	0	0	0	0	0	0	0	0	0	0	0	FALSE
57037	ANKMY2	0	0	0	0	0	0	0	0	0	0	0	0	0	0	0	0	0	0	FALSE
57763	ANKRA2	0	0	0	0	0	0	0	0	0	0	0	0	0	0	0	0	0	0	FALSE
27063	ANKRD1	0	0	0	0	0	0	0	0	0	0	0	0	0	0	0	0	0	0	FALSE
55608	ANKRD10	0	0	0	0	0	0	0	0	0	0	0	0	0	0	0	0	0	0	FALSE
29123	ANKRD11	0	0	0	0	0	0	0	0	0	0	0	0	0	0	0	0	0	0	FALSE
23253	ANKRD12	0	0	0	0	0	0	0	0	0	0	0	0	0	0	0	0	0	0	FALSE
88455	ANKRD13A	0	0	0	0	0	0	0	0	0	0	0	0	0	0	0	0	0	0	FALSE
124930	ANKRD13B	0	0	0	0	0	0	0	0	0	0	0	0	0	0	0	0	0	0	FALSE
81573	ANKRD13C	0	0	0	0	0	0	0	0	0	0	0	0	0	0	0	0	0	0	FALSE
338692	ANKRD13D	0	0	0	0	0	0	0	0	0	0	0	0	0	0	0	0	0	0	FALSE
54522	ANKRD16	0	0	0	0	0	0	0	0	0	0	0	0	0	0	0	0	0	0	FALSE
26057	ANKRD17	0	1	0	0	0	0	0	0	0	1	0	0	0	0	0	0	0	2	FALSE
253650	ANKRD18A	0	0	0	0	0	0	0	0	0	0	0	0	0	0	0	0	0	0	FALSE
26287	ANKRD2	0	0	0	0	0	0	0	0	0	0	0	0	0	0	0	0	0	0	FALSE
118932	ANKRD22	0	0	0	0	0	0	0	0	0	0	0	0	0	0	0	0	0	0	FALSE
200539	ANKRD23	0	0	0	0	0	0	0	0	0	0	0	0	0	0	0	0	0	0	FALSE
170961	ANKRD24	0	0	0	0	0	0	0	0	0	0	0	0	0	0	0	0	0	0	FALSE
22852	ANKRD26	0	0	0	0	0	0	0	0	0	0	0	0	0	0	0	0	0	0	FALSE
84079	ANKRD27	0	0	0	0	0	0	0	0	0	0	0	0	0	0	0	0	0	0	FALSE
23243	ANKRD28	0	0	0	0	0	0	0	0	0	0	0	0	0	0	0	0	0	0	FALSE
147463	ANKRD29	0	0	0	0	0	0	0	0	0	0	0	0	0	0	0	0	0	0	FALSE
91074	ANKRD30A	0	0	0	0	0	0	0	0	0	0	0	0	0	0	0	0	0	0	FALSE
374860	ANKRD30B	0	0	0	0	0	0	0	0	0	0	0	0	0	0	0	0	0	0	FALSE
256006	ANKRD31	0	0	0	0	0	0	0	0	0	0	0	0	0	0	0	0	0	0	FALSE
341405	ANKRD33	0	0	0	0	0	0	0	0	0	0	0	0	0	0	0	0	0	0	FALSE
651746	ANKRD33B	0	0	0	0	0	0	0	0	0	0	0	0	0	0	0	0	0	0	FALSE
340120	ANKRD34B	0	0	0	0	0	0	0	0	0	0	0	0	0	0	0	0	0	0	FALSE
390616	ANKRD34C	0	0	0	0	0	0	0	0	0	0	0	0	0	0	0	0	0	0	FALSE
148741	ANKRD35	0	0	0	0	0	0	0	0	0	0	0	0	0	0	0	0	0	0	FALSE
57730	ANKRD36B	0	0	0	0	0	0	0	0	0	0	0	0	0	0	0	0	0	0	FALSE
353322	ANKRD37	0	0	0	0	0	0	0	0	0	0	0	0	0	0	0	0	0	0	FALSE
91369	ANKRD40	0	0	0	0	0	0	0	0	0	0	0	0	0	0	0	0	0	0	FALSE
338699	ANKRD42	0	0	0	0	0	0	0	0	0	0	0	0	0	0	0	0	0	0	FALSE
91526	ANKRD44	0	0	0	0	0	0	0	0	0	0	0	0	0	0	0	0	0	0	FALSE
339416	ANKRD45	0	0	0	0	0	0	0	0	0	0	0	0	0	0	0	0	0	0	FALSE
157567	ANKRD46	0	0	0	0	0	0	0	0	0	0	0	0	0	0	0	0	0	0	FALSE
54851	ANKRD49	0	0	0	0	0	0	0	0	0	0	0	0	0	0	0	0	0	0	FALSE
57182	ANKRD50	0	0	0	0	0	0	0	0	0	0	0	0	0	0	0	0	0	0	FALSE
79998	ANKRD53	0	0	0	0	0	0	0	0	0	0	0	0	0	0	0	0	0	0	FALSE
22881	ANKRD6	0	0	0	0	0	0	0	0	0	0	0	0	0	0	0	0	0	0	FALSE
342850	ANKRD62	0	0	0	0	0	0	0	0	0	0	0	0	0	0	0	0	0	0	FALSE
441869	ANKRD65	0	0	0	0	0	0	0	0	0	0	0	0	0	0	0	0	0	0	FALSE
100287718	ANKRD66	0	0	0	0	0	0	0	0	0	0	0	0	0	0	0	0	0	0	FALSE
56311	ANKRD7	0	0	0	0	0	0	0	0	0	0	0	0	0	0	0	0	0	0	FALSE
23294	ANKS1A	0	0	0	0	0	0	0	0	0	0	0	0	0	0	0	0	0	0	FALSE
124401	ANKS3	0	0	0	0	0	0	0	0	0	0	0	0	0	0	0	0	0	0	FALSE
257629	ANKS4B	0	0	0	0	0	0	0	0	0	0	0	0	0	0	0	0	0	0	FALSE
203286	ANKS6	0	0	0	0	0	0	0	0	0	0	0	0	0	0	0	0	0	0	FALSE
55139	ANKZF1	0	0	0	0	0	0	0	0	0	0	0	0	0	0	0	0	0	0	FALSE
54443	ANLN	0	0	0	0	0	0	0	0	0	0	0	0	0	0	0	0	0	0	FALSE
55107	ANO1	0	0	0	0	0	0	0	0	0	0	0	0	0	0	0	0	0	0	FALSE
55129	ANO10	0	0	0	0	0	0	0	0	0	0	0	0	0	0	0	0	0	0	FALSE
57101	ANO2	0	0	0	0	0	0	0	0	0	0	0	0	0	0	0	0	0	0	FALSE
63982	ANO3	0	0	0	0	0	0	0	0	0	0	0	0	0	0	0	0	0	0	FALSE
203859	ANO5	0	0	0	0	0	0	0	0	0	0	0	0	0	0	0	0	0	0	FALSE
196527	ANO6	0	0	0	0	0	0	0	0	0	0	0	0	0	0	0	0	0	0	FALSE
57719	ANO8	0	0	0	0	0	0	0	0	0	0	0	0	0	0	0	0	0	0	FALSE
3730	ANOS1	0	0	0	0	0	0	0	0	0	0	0	0	0	0	0	0	0	0	FALSE
8125	ANP32A	0	0	0	0	0	0	0	0	0	0	0	0	0	0	0	0	0	0	FALSE
10541	ANP32B	0	0	0	0	0	0	0	0	0	0	0	0	0	0	0	0	0	0	FALSE
23519	ANP32D	0	0	0	0	0	0	0	0	0	0	0	0	0	0	0	0	0	0	FALSE
81611	ANP32E	0	0	0	0	0	0	0	0	0	0	0	0	0	0	0	0	0	0	FALSE
290	ANPEP	0	0	0	0	0	0	0	0	0	0	0	0	0	0	0	0	0	0	FALSE
84168	ANTXR1	0	0	0	0	0	0	0	0	0	0	0	0	0	0	0	0	0	0	FALSE
118429	ANTXR2	0	0	0	0	0	0	0	0	0	0	0	0	0	0	0	0	0	0	FALSE
195977	ANTXRL	0	0	0	0	0	0	0	0	0	0	0	0	0	0	0	0	0	0	FALSE
301	ANXA1	0	0	0	0	0	0	0	0	0	0	0	0	0	0	0	0	0	0	FALSE
11199	ANXA10	0	0	0	0	0	0	0	0	0	0	0	0	0	0	0	0	0	0	FALSE
311	ANXA11	0	0	0	0	0	0	0	0	0	0	0	0	0	0	0	0	0	0	FALSE
312	ANXA13	0	0	0	0	0	0	0	0	0	0	0	0	0	0	0	0	0	0	FALSE
302	ANXA2	0	0	0	0	0	0	0	0	0	0	0	0	0	0	0	0	0	0	FALSE
306	ANXA3	0	0	0	0	0	0	0	0	0	0	0	0	0	0	0	0	0	0	FALSE
307	ANXA4	0	0	0	0	0	0	0	0	0	0	0	0	0	0	0	0	0	0	FALSE
308	ANXA5	0	0	0	0	0	0	0	0	0	0	0	0	0	0	0	0	0	0	FALSE
309	ANXA6	0	0	0	0	0	0	0	0	0	0	0	0	0	0	0	0	0	0	FALSE
310	ANXA7	0	0	0	0	0	0	0	0	0	0	0	0	0	0	0	0	0	0	FALSE
8416	ANXA9	0	0	0	0	0	0	0	0	0	0	0	0	0	0	0	0	0	0	FALSE
313	AOAH	0	0	0	0	0	0	0	0	0	0	0	0	0	0	0	0	0	0	FALSE
26	AOC1	0	0	0	0	0	0	0	0	0	0	0	0	0	0	0	0	0	0	FALSE
314	AOC2	0	0	0	0	0	0	0	0	0	0	0	0	0	0	0	0	0	0	FALSE
8639	AOC3	0	0	0	0	0	0	0	0	0	0	0	0	0	0	0	0	0	0	FALSE
316	AOX1	0	0	0	0	0	0	0	0	0	0	0	0	0	0	0	0	0	0	FALSE
55435	AP1AR	0	0	0	0	0	0	0	0	0	0	0	0	0	0	0	0	0	0	FALSE
162	AP1B1	0	0	0	0	0	0	0	0	0	0	0	0	0	0	0	0	0	0	FALSE
164	AP1G1	0	0	0	0	0	0	0	0	0	0	0	0	0	0	0	0	0	0	FALSE
8906	AP1G2	0	0	0	0	0	0	0	0	0	0	0	0	0	0	0	0	0	0	FALSE
8907	AP1M1	0	0	0	0	0	0	0	0	0	0	0	0	0	0	0	0	0	0	FALSE
10053	AP1M2	0	0	0	0	0	0	0	0	0	0	0	0	0	0	0	0	0	0	FALSE
1174	AP1S1	0	0	0	0	0	0	0	0	0	0	0	0	0	0	0	0	0	0	FALSE
8905	AP1S2	0	0	0	0	0	0	0	0	0	0	0	0	0	0	0	0	0	0	FALSE
130340	AP1S3	0	0	0	0	0	0	0	0	0	0	0	0	0	0	0	0	0	0	FALSE
160	AP2A1	0	0	0	0	0	0	0	0	0	0	0	0	0	0	0	0	0	0	FALSE
161	AP2A2	0	0	0	0	0	0	0	0	0	0	0	0	0	0	0	0	0	0	FALSE
163	AP2B1	0	0	0	0	0	0	0	0	0	0	0	0	0	0	0	0	0	0	FALSE
1173	AP2M1	0	1	1	1	1	1	0	1	1	1	1	1	1	1	1	0	0	13	FALSE
1175	AP2S1	0	1	0	0	0	0	0	1	0	1	1	0	0	1	0	0	0	5	FALSE
8546	AP3B1	0	0	0	0	0	0	0	0	0	0	0	0	0	0	0	0	0	0	FALSE
8943	AP3D1	0	0	0	0	0	0	0	0	0	0	0	0	0	0	0	0	0	0	FALSE
26985	AP3M1	0	0	0	0	0	0	0	0	0	0	0	0	0	0	0	0	0	0	FALSE
10947	AP3M2	0	0	0	0	0	0	0	0	0	0	0	0	0	0	0	0	0	0	FALSE
1176	AP3S1	0	0	0	0	0	0	0	0	0	0	0	0	0	0	0	0	0	0	FALSE
10239	AP3S2	0	0	0	0	0	0	0	0	0	0	0	0	0	0	0	0	0	0	FALSE
10717	AP4B1	0	0	0	0	0	0	0	0	0	0	0	0	0	0	0	0	0	0	FALSE
23431	AP4E1	0	0	0	0	0	0	0	0	0	0	0	0	0	0	0	0	0	0	FALSE
9179	AP4M1	0	0	0	0	0	0	0	0	0	0	0	0	0	0	0	0	0	0	FALSE
11154	AP4S1	0	0	0	0	0	0	0	0	0	0	0	0	0	0	0	0	0	0	FALSE
55745	AP5M1	0	0	0	0	0	0	0	0	0	0	0	0	0	0	0	0	0	0	FALSE
317	APAF1	0	0	0	0	0	0	0	0	0	0	0	0	0	0	0	0	0	0	FALSE
320	APBA1	0	0	0	0	0	0	0	0	0	0	0	0	0	0	0	0	0	0	FALSE
321	APBA2	0	0	0	0	0	0	0	0	0	0	0	0	0	0	0	0	0	0	FALSE
9546	APBA3	0	0	0	0	0	0	0	0	0	0	0	0	0	0	0	0	0	0	FALSE
322	APBB1	0	0	0	0	0	0	0	0	0	0	0	0	0	0	0	0	0	0	FALSE
54518	APBB1IP	0	0	0	0	0	0	0	0	0	0	0	0	0	0	0	0	0	0	FALSE
323	APBB2	0	0	0	0	0	0	0	0	0	0	0	0	0	0	0	0	0	0	FALSE
10307	APBB3	0	0	0	0	0	0	0	0	0	0	0	0	0	0	0	0	0	0	FALSE
324	APC	0	0	0	0	0	0	0	0	0	0	0	0	0	0	0	0	0	0	FALSE
10297	APC2	0	0	0	0	0	0	0	0	0	0	0	0	0	0	0	0	0	0	FALSE
147495	APCDD1	0	0	0	0	0	0	0	0	0	0	0	0	0	0	0	0	0	0	FALSE
164284	APCDD1L	0	0	0	0	0	0	0	0	0	0	0	0	0	0	0	0	0	0	FALSE
325	APCS	0	0	0	0	0	0	0	0	0	0	0	0	0	0	0	0	0	0	FALSE
327	APEH	0	0	0	0	0	0	0	0	0	0	0	0	0	0	0	0	0	0	FALSE
328	APEX1	0	0	0	0	0	0	0	0	0	0	0	0	0	0	0	0	0	0	FALSE
27301	APEX2	0	0	0	0	0	0	0	0	0	0	0	0	0	0	0	0	0	0	FALSE
51107	APH1A	0	0	0	0	0	0	0	0	0	0	0	0	0	0	0	0	0	0	FALSE
83464	APH1B	0	0	0	0	0	0	0	0	0	0	0	0	0	0	0	0	0	0	FALSE
8539	API5	0	0	0	0	0	0	0	0	0	0	0	0	0	0	0	0	0	0	FALSE
51074	APIP	0	0	0	0	0	0	0	0	0	0	0	0	0	0	0	0	0	0	FALSE
200558	APLF	0	0	0	0	0	0	0	0	0	0	0	0	0	0	0	0	0	0	FALSE
8862	APLN	0	0	0	0	0	0	0	0	0	0	0	0	0	0	0	0	0	0	FALSE
187	APLNR	0	0	0	0	0	0	0	0	0	0	0	0	0	0	0	0	0	0	FALSE
333	APLP1	0	0	0	0	0	0	0	0	0	0	0	0	0	0	0	0	0	0	FALSE
334	APLP2	0	0	0	0	0	0	0	0	0	0	0	0	0	0	0	0	0	0	FALSE
57136	APMAP	0	0	0	0	0	0	0	0	0	0	0	0	0	0	0	0	0	0	FALSE
335	APOA1	0	0	0	0	0	0	0	0	0	0	0	0	0	0	0	0	0	0	FALSE
336	APOA2	0	0	0	0	0	0	0	0	0	0	0	0	0	0	0	0	0	0	FALSE
337	APOA4	0	0	0	0	0	0	0	0	0	0	0	0	0	0	0	0	0	0	FALSE
116519	APOA5	0	0	0	0	0	0	0	0	0	0	0	0	0	0	0	0	0	0	FALSE
338	APOB	0	0	0	0	0	0	0	0	0	0	0	0	0	0	0	0	0	0	FALSE
339	APOBEC1	0	0	0	0	0	0	0	0	0	0	0	0	0	0	0	0	0	0	FALSE
10930	APOBEC2	0	0	0	0	0	0	0	0	0	0	0	0	0	0	0	0	0	0	FALSE
200315	APOBEC3A	0	0	0	0	0	0	0	0	0	0	0	0	0	0	0	0	0	0	FALSE
9582	APOBEC3B	0	0	0	0	0	0	0	0	0	0	0	0	0	0	0	0	0	0	FALSE
27350	APOBEC3C	0	0	0	0	0	0	0	0	0	0	0	0	0	0	0	0	0	0	FALSE
140564	APOBEC3D	0	0	0	0	0	0	0	0	0	0	0	0	0	0	0	0	0	0	FALSE
200316	APOBEC3F	0	0	0	0	0	0	0	0	0	0	0	0	0	0	0	0	0	0	FALSE
60489	APOBEC3G	0	0	0	0	0	0	0	0	0	0	0	0	0	0	0	0	0	0	FALSE
164668	APOBEC3H	0	0	0	0	0	0	0	0	0	0	0	0	0	0	0	0	0	0	FALSE
403314	APOBEC4	0	0	0	0	0	0	0	0	0	0	0	0	0	0	0	0	0	0	FALSE
55911	APOBR	0	0	0	0	0	0	0	0	0	0	0	0	0	0	0	0	0	0	FALSE
341	APOC1	0	0	0	0	0	0	0	0	0	0	0	0	0	0	0	0	0	0	FALSE
344	APOC2	0	0	0	0	0	0	0	0	0	0	0	0	0	0	0	0	0	0	FALSE
345	APOC3	0	0	0	0	0	0	0	0	0	0	0	0	0	0	0	0	0	0	FALSE
346	APOC4	0	0	0	0	0	0	0	0	0	0	0	0	0	0	0	0	0	0	FALSE
347	APOD	0	0	0	0	0	0	0	0	0	0	0	0	0	0	0	0	0	0	FALSE
348	APOE	0	0	0	0	0	0	0	0	0	0	0	0	0	0	0	0	0	0	FALSE
319	APOF	0	0	0	0	0	0	0	0	0	0	0	0	0	0	0	0	0	0	FALSE
350	APOH	0	0	0	0	0	0	0	0	0	0	0	0	0	0	0	0	0	0	FALSE
8542	APOL1	0	0	0	0	0	0	0	0	0	0	0	0	0	0	0	0	0	0	FALSE
23780	APOL2	0	0	0	0	0	0	0	0	0	0	0	0	0	0	0	0	0	0	FALSE
80833	APOL3	0	0	0	0	0	0	0	0	0	0	0	0	0	0	0	0	0	0	FALSE
80831	APOL5	0	0	0	0	0	0	0	0	0	0	0	0	0	0	0	0	0	0	FALSE
80830	APOL6	0	0	0	0	0	0	0	0	0	0	0	0	0	0	0	0	0	0	FALSE
81575	APOLD1	0	0	0	0	0	0	0	0	0	0	0	0	0	0	0	0	0	0	FALSE
55937	APOM	0	0	0	0	0	0	0	0	0	0	0	0	0	0	0	0	0	0	FALSE
79135	APOO	0	0	0	0	0	0	0	0	0	0	0	0	0	0	0	0	0	0	FALSE
139322	APOOL	0	0	0	0	0	0	0	0	0	0	0	0	0	0	0	0	0	0	FALSE
84334	COA8	0	0	0	0	0	0	0	0	0	0	0	0	0	0	0	0	0	0	FALSE
351	APP	0	0	0	0	0	0	0	0	0	0	0	0	0	0	0	0	0	0	FALSE
10513	APPBP2	0	0	0	0	0	0	0	0	0	0	0	0	0	0	0	0	0	0	FALSE
26060	APPL1	0	0	0	0	0	0	0	0	0	0	0	0	0	0	0	0	0	0	FALSE
55198	APPL2	0	0	0	0	0	0	0	0	0	0	0	0	0	0	0	0	0	0	FALSE
353	APRT	0	0	0	0	0	0	0	0	0	0	0	0	0	0	0	0	0	0	FALSE
54840	APTX	0	0	0	0	0	0	0	0	0	0	0	0	0	0	0	0	0	0	FALSE
358	AQP1	0	0	0	0	0	0	0	0	0	0	0	0	0	0	0	0	0	0	FALSE
89872	AQP10	0	0	0	0	0	0	0	0	0	0	0	0	0	0	0	0	0	0	FALSE
282679	AQP11	0	0	0	0	0	0	0	0	0	0	0	0	0	0	0	0	0	0	FALSE
653437	AQP12B	0	0	0	0	0	0	0	0	0	0	0	0	0	0	0	0	0	0	FALSE
359	AQP2	0	0	0	0	0	0	0	0	0	0	0	0	0	0	0	0	0	0	FALSE
360	AQP3	0	0	0	0	0	0	0	0	0	0	0	0	0	0	0	0	0	0	FALSE
361	AQP4	0	0	0	0	0	0	0	0	0	0	0	0	0	0	0	0	0	0	FALSE
362	AQP5	0	0	0	0	0	0	0	0	0	0	0	0	0	0	0	0	0	0	FALSE
363	AQP6	0	0	0	0	0	0	0	0	0	0	0	0	0	0	0	0	0	0	FALSE
364	AQP7	0	0	0	0	0	0	0	0	0	0	0	0	0	0	0	0	0	0	FALSE
343	AQP8	0	0	0	0	0	0	0	0	0	0	0	0	0	0	0	0	0	0	FALSE
366	AQP9	0	0	0	0	0	0	0	0	0	0	0	0	0	0	0	0	0	0	FALSE
9716	AQR	1	1	1	1	1	1	1	1	1	1	0	1	1	1	1	0	1	15	TRUE
367	AR	0	0	0	0	0	0	0	0	0	0	0	0	0	0	0	0	0	0	FALSE
369	ARAF	0	0	0	0	0	0	0	0	0	0	0	0	0	0	0	0	0	0	FALSE
116985	ARAP1	0	0	0	0	0	0	0	0	0	0	0	0	0	0	0	0	0	0	FALSE
116984	ARAP2	0	0	0	0	0	0	0	0	0	0	0	0	0	0	0	0	0	0	FALSE
64411	ARAP3	0	0	0	0	0	0	0	0	0	0	0	0	0	0	0	0	0	0	FALSE
23237	ARC	0	0	0	0	0	0	0	0	0	0	0	0	0	0	0	0	0	0	FALSE
372	ARCN1	1	1	1	1	1	1	1	1	1	1	1	1	1	1	1	0	1	16	TRUE
374	AREG	0	0	0	0	0	0	0	0	0	0	0	0	0	0	0	0	0	0	FALSE
9870	AREL1	0	0	0	0	0	0	0	0	0	0	0	0	0	0	0	0	0	0	FALSE
375	ARF1	0	0	0	0	0	0	0	0	0	0	0	0	0	0	0	0	0	0	FALSE
377	ARF3	0	0	0	0	0	0	0	0	0	0	0	0	0	0	0	0	0	0	FALSE
378	ARF4	0	0	0	0	0	0	0	0	0	0	0	0	0	0	0	0	0	0	FALSE
381	ARF5	0	0	0	0	0	0	0	0	0	0	0	0	0	0	0	0	0	0	FALSE
382	ARF6	0	0	0	0	0	0	0	0	0	0	0	0	0	0	0	0	0	0	FALSE
55738	ARFGAP1	0	0	0	0	0	0	0	0	0	0	0	0	0	0	0	0	0	0	FALSE
84364	ARFGAP2	0	0	0	0	0	0	0	0	0	0	0	0	0	0	0	0	0	0	FALSE
26286	ARFGAP3	0	0	0	0	0	0	0	0	0	0	0	0	0	0	0	0	0	0	FALSE
10565	ARFGEF1	0	0	0	0	0	0	0	0	0	0	0	0	0	0	0	0	0	0	FALSE
57221	ARFGEF3	0	0	0	0	0	0	0	0	0	0	0	0	0	0	0	0	0	0	FALSE
27236	ARFIP1	0	0	0	0	0	0	0	0	0	0	0	0	0	0	0	0	0	0	FALSE
23647	ARFIP2	0	0	0	0	0	0	0	0	0	0	0	0	0	0	0	0	0	0	FALSE
10139	ARFRP1	0	0	0	0	0	0	0	0	0	0	0	0	0	0	0	0	0	0	FALSE
383	ARG1	0	0	0	0	0	0	0	0	0	0	0	0	0	0	0	0	0	0	FALSE
384	ARG2	0	0	0	0	0	0	0	0	0	0	0	0	0	0	0	0	0	0	FALSE
503582	ARGFX	0	0	0	0	0	0	0	0	0	0	0	0	0	0	0	0	0	0	FALSE
55082	ARGLU1	0	1	0	0	0	0	0	0	0	1	0	0	0	0	0	0	0	2	FALSE
392	ARHGAP1	0	0	0	0	0	0	0	0	0	0	0	0	0	0	0	0	0	0	FALSE
79658	ARHGAP10	0	0	0	0	0	0	0	0	0	0	0	0	0	0	0	0	0	0	FALSE
9824	ARHGAP11A	0	0	0	0	0	0	0	0	0	0	0	0	0	0	0	0	0	0	FALSE
89839	ARHGAP11B	0	0	0	0	0	0	0	0	0	0	0	0	0	0	0	0	0	0	FALSE
94134	ARHGAP12	0	0	0	0	0	0	0	0	0	0	0	0	0	0	0	0	0	0	FALSE
55843	ARHGAP15	0	0	0	0	0	0	0	0	0	0	0	0	0	0	0	0	0	0	FALSE
55114	ARHGAP17	0	0	0	0	0	0	0	0	0	0	0	0	0	0	0	0	0	0	FALSE
93663	ARHGAP18	0	0	0	0	0	0	0	0	0	0	0	0	0	0	0	0	0	0	FALSE
84986	ARHGAP19	0	0	0	0	0	0	0	0	0	0	0	0	0	0	0	0	0	0	FALSE
57569	ARHGAP20	0	0	0	0	0	0	0	0	0	0	0	0	0	0	0	0	0	0	FALSE
57584	ARHGAP21	0	0	0	0	0	0	0	0	0	0	0	0	0	0	0	0	0	0	FALSE
58504	ARHGAP22	0	0	0	0	0	0	0	0	0	0	0	0	0	0	0	0	0	0	FALSE
57636	ARHGAP23	0	0	0	0	0	0	0	0	0	0	0	0	0	0	0	0	0	0	FALSE
83478	ARHGAP24	0	0	0	0	0	0	0	0	0	0	0	0	0	0	0	0	0	0	FALSE
9938	ARHGAP25	0	0	0	0	0	0	0	0	0	0	0	0	0	0	0	0	0	0	FALSE
23092	ARHGAP26	0	0	0	0	0	0	0	0	0	0	0	0	0	0	0	0	0	0	FALSE
201176	ARHGAP27	0	0	0	0	0	0	0	0	0	0	0	0	0	0	0	0	0	0	FALSE
79822	ARHGAP28	0	0	0	0	0	0	0	0	0	0	0	0	0	0	0	0	0	0	FALSE
9411	ARHGAP29	0	0	0	0	0	0	0	0	0	0	0	0	0	0	0	0	0	0	FALSE
257106	ARHGAP30	0	0	0	0	0	0	0	0	0	0	0	0	0	0	0	0	0	0	FALSE
57514	ARHGAP31	0	0	0	0	0	0	0	0	0	0	0	0	0	0	0	0	0	0	FALSE
9743	ARHGAP32	0	0	0	0	0	0	0	0	0	0	0	0	0	0	0	0	0	0	FALSE
115703	ARHGAP33	0	0	0	0	0	0	0	0	0	0	0	0	0	0	0	0	0	0	FALSE
2909	ARHGAP35	0	0	0	0	0	0	0	0	0	0	0	0	0	0	0	0	0	0	FALSE
158763	ARHGAP36	0	0	0	0	0	0	0	0	0	0	0	0	0	0	0	0	0	0	FALSE
80728	ARHGAP39	0	0	0	0	0	0	0	0	0	0	0	0	0	0	0	0	0	0	FALSE
393	ARHGAP4	0	0	0	0	0	0	0	0	0	0	0	0	0	0	0	0	0	0	FALSE
9912	ARHGAP44	0	0	0	0	0	0	0	0	0	0	0	0	0	0	0	0	0	0	FALSE
23526	ARHGAP45	0	0	0	0	0	0	0	0	0	0	0	0	0	0	0	0	0	0	FALSE
394	ARHGAP5	0	0	0	0	0	0	0	0	0	0	0	0	0	0	0	0	0	0	FALSE
395	ARHGAP6	0	0	0	0	0	0	0	0	0	0	0	0	0	0	0	0	0	0	FALSE
23779	ARHGAP8	0	0	0	0	0	0	0	0	0	0	0	0	0	0	0	0	0	0	FALSE
64333	ARHGAP9	0	0	0	0	0	0	0	0	0	0	0	0	0	0	0	0	0	0	FALSE
396	ARHGDIA	0	0	0	0	0	0	0	0	0	0	0	0	0	0	0	0	0	0	FALSE
397	ARHGDIB	0	0	0	0	0	0	0	0	0	0	0	0	0	0	0	0	0	0	FALSE
398	ARHGDIG	0	0	0	0	0	0	0	0	0	0	0	0	0	0	0	0	0	0	FALSE
9138	ARHGEF1	0	0	0	0	0	0	0	0	0	0	0	0	0	0	0	0	0	0	FALSE
9639	ARHGEF10	0	0	0	0	0	0	0	0	0	0	0	0	0	0	0	0	0	0	FALSE
55160	ARHGEF10L	0	0	0	0	0	0	0	0	0	0	0	0	0	0	0	0	0	0	FALSE
9826	ARHGEF11	0	0	0	0	0	0	0	0	0	0	0	0	0	0	0	0	0	0	FALSE
23365	ARHGEF12	0	0	0	0	0	0	0	0	0	0	0	0	0	0	0	0	0	0	FALSE
22899	ARHGEF15	0	0	0	0	0	0	0	0	0	0	0	0	0	0	0	0	0	0	FALSE
27237	ARHGEF16	0	0	0	0	0	0	0	0	0	0	0	0	0	0	0	0	0	0	FALSE
23370	ARHGEF18	0	0	0	0	0	0	0	0	0	0	0	0	0	0	0	0	0	0	FALSE
128272	ARHGEF19	0	0	0	0	0	0	0	0	0	0	0	0	0	0	0	0	0	0	FALSE
9181	ARHGEF2	0	0	0	0	0	0	0	0	0	0	0	0	0	0	0	0	0	0	FALSE
115557	ARHGEF25	0	0	0	0	0	0	0	0	0	0	0	0	0	0	0	0	0	0	FALSE
26084	ARHGEF26	0	0	0	0	0	0	0	0	0	0	0	0	0	0	0	0	0	0	FALSE
64283	ARHGEF28	0	0	0	0	0	0	0	0	0	0	0	0	0	0	0	0	0	0	FALSE
50650	ARHGEF3	0	0	0	0	0	0	0	0	0	0	0	0	0	0	0	0	0	0	FALSE
100271715	ARHGEF33	0	0	0	0	0	0	0	0	0	0	0	0	0	0	0	0	0	0	FALSE
445328	ARHGEF35	0	0	0	0	0	0	0	0	0	0	0	0	0	0	0	0	0	0	FALSE
389337	ARHGEF37	0	0	0	0	0	0	0	0	0	0	0	0	0	0	0	0	0	0	FALSE
54848	ARHGEF38	0	0	0	0	0	0	0	0	0	0	0	0	0	0	0	0	0	0	FALSE
84904	ARHGEF39	0	0	0	0	0	0	0	0	0	0	0	0	0	0	0	0	0	0	FALSE
50649	ARHGEF4	0	0	0	0	0	0	0	0	0	0	0	0	0	0	0	0	0	0	FALSE
55701	ARHGEF40	0	0	0	0	0	0	0	0	0	0	0	0	0	0	0	0	0	0	FALSE
7984	ARHGEF5	0	0	0	0	0	0	0	0	0	0	0	0	0	0	0	0	0	0	FALSE
9459	ARHGEF6	0	0	0	0	0	0	0	0	0	0	0	0	0	0	0	0	0	0	FALSE
8874	ARHGEF7	0	0	0	0	0	0	0	0	0	0	0	0	0	0	0	0	0	0	FALSE
23229	ARHGEF9	0	0	0	0	0	0	0	0	0	0	0	0	0	0	0	0	0	0	FALSE
8289	ARID1A	0	0	0	0	0	0	0	0	0	0	0	0	0	0	0	0	0	0	FALSE
57492	ARID1B	0	0	0	0	0	0	0	0	0	0	0	0	0	0	0	0	0	0	FALSE
196528	ARID2	0	0	0	0	0	0	0	0	0	0	0	0	0	0	0	0	0	0	FALSE
1820	ARID3A	0	0	0	0	0	0	0	0	0	0	0	0	0	0	0	0	0	0	FALSE
10620	ARID3B	0	0	0	0	0	0	0	0	0	0	0	0	0	0	0	0	0	0	FALSE
138715	ARID3C	0	0	0	0	0	0	0	0	0	0	0	0	0	0	0	0	0	0	FALSE
5926	ARID4A	0	0	0	0	0	0	0	0	0	0	0	0	0	0	0	0	0	0	FALSE
51742	ARID4B	0	0	0	0	0	0	0	0	0	0	0	0	0	0	0	0	0	0	FALSE
10865	ARID5A	0	0	0	0	0	0	0	0	0	0	0	0	0	0	0	0	0	0	FALSE
84159	ARID5B	0	0	0	0	0	0	0	0	0	0	0	0	0	0	0	0	0	0	FALSE
25820	ARIH1	1	1	1	1	1	1	0	0	1	1	1	1	1	1	1	1	1	15	TRUE
10425	ARIH2	0	0	0	0	0	0	0	0	0	0	0	0	0	0	0	0	0	0	FALSE
400	ARL1	0	0	0	0	0	0	0	0	0	0	0	0	0	0	0	0	0	0	FALSE
285598	ARL10	0	0	0	0	0	0	0	0	0	0	0	0	0	0	0	0	0	0	FALSE
115761	ARL11	0	0	0	0	0	0	0	0	0	0	0	0	0	0	0	0	0	0	FALSE
392509	ARL13A	0	0	0	0	0	0	0	0	0	0	0	0	0	0	0	0	0	0	FALSE
200894	ARL13B	0	0	0	0	0	0	0	0	0	0	0	0	0	0	0	0	0	0	FALSE
80117	ARL14	0	0	0	0	0	0	0	0	0	0	0	0	0	0	0	0	0	0	FALSE
120534	ARL14EP	0	0	0	0	0	0	0	0	0	0	0	0	0	0	0	0	0	0	FALSE
54622	ARL15	0	0	0	0	0	0	0	0	0	0	0	0	0	0	0	0	0	0	FALSE
339231	ARL16	0	0	0	0	0	0	0	0	0	0	0	0	0	0	0	0	0	0	FALSE
51326	ARL17A	0	0	0	0	0	0	0	0	0	0	0	0	0	0	0	0	0	0	FALSE
402	ARL2	0	0	0	0	0	0	0	0	0	0	0	0	0	0	0	0	0	0	FALSE
23568	ARL2BP	0	0	0	0	0	0	0	0	0	0	0	0	0	0	0	0	0	0	FALSE
403	ARL3	0	0	0	0	0	0	0	0	0	0	0	0	0	0	0	0	0	0	FALSE
10124	ARL4A	0	0	0	0	0	0	0	0	0	0	0	0	0	0	0	0	0	0	FALSE
10123	ARL4C	0	0	0	0	0	0	0	0	0	0	0	0	0	0	0	0	0	0	FALSE
379	ARL4D	0	0	0	0	0	0	0	0	0	0	0	0	0	0	0	0	0	0	FALSE
26225	ARL5A	0	0	0	0	0	0	0	0	0	0	0	0	0	0	0	0	0	0	FALSE
221079	ARL5B	0	0	0	0	0	0	0	0	0	0	0	0	0	0	0	0	0	0	FALSE
390790	ARL5C	0	0	0	0	0	0	0	0	0	0	0	0	0	0	0	0	0	0	FALSE
84100	ARL6	0	0	0	0	0	0	0	0	0	0	0	0	0	0	0	0	0	0	FALSE
23204	ARL6IP1	0	0	0	0	0	0	0	0	0	0	0	0	0	0	0	0	0	0	FALSE
51329	ARL6IP4	0	0	0	0	0	0	0	0	0	0	0	0	0	0	0	0	0	0	FALSE
10550	ARL6IP5	0	0	0	0	0	0	0	0	0	0	0	0	0	0	0	0	0	0	FALSE
127829	ARL8A	0	0	0	0	0	0	0	0	0	0	0	0	0	0	0	0	0	0	FALSE
55207	ARL8B	0	0	0	0	0	0	0	0	0	0	0	0	0	0	0	0	0	0	FALSE
132946	ARL9	0	0	0	0	0	0	0	0	0	0	0	0	0	0	0	0	0	0	FALSE
55156	ARMC1	0	0	0	0	0	0	0	0	0	0	0	0	0	0	0	0	0	0	FALSE
83787	ARMC10	0	0	0	0	0	0	0	0	0	0	0	0	0	0	0	0	0	0	FALSE
84071	ARMC2	0	0	0	0	0	0	0	0	0	0	0	0	0	0	0	0	0	0	FALSE
219681	ARMC3	0	0	0	0	0	0	0	0	0	0	0	0	0	0	0	0	0	0	FALSE
55130	ARMC4	0	0	0	0	0	0	0	0	0	0	0	0	0	0	0	0	0	0	FALSE
79798	ARMC5	0	0	0	0	0	0	0	0	0	0	0	0	0	0	0	0	0	0	FALSE
93436	ARMC6	0	0	0	0	0	0	0	0	0	0	0	0	0	0	0	0	0	0	FALSE
79637	ARMC7	0	0	0	0	0	0	0	0	0	0	0	0	0	0	0	0	0	0	FALSE
25852	ARMC8	0	0	0	0	0	0	0	0	0	0	0	0	0	0	0	0	0	0	FALSE
51309	ARMCX1	0	0	0	0	0	0	0	0	0	0	0	0	0	0	0	0	0	0	FALSE
9823	ARMCX2	0	0	0	0	0	0	0	0	0	0	0	0	0	0	0	0	0	0	FALSE
51566	ARMCX3	0	0	0	0	0	0	0	0	0	0	0	0	0	0	0	0	0	0	FALSE
64860	ARMCX5	0	0	0	0	0	0	0	0	0	0	0	0	0	0	0	0	0	0	FALSE
54470	ARMCX6	0	0	0	0	0	0	0	0	0	0	0	0	0	0	0	0	0	0	FALSE
339541	ARMH1	0	0	0	0	0	0	0	0	0	0	0	0	0	0	0	0	0	0	FALSE
79591	ARMH3	0	0	0	0	0	0	0	0	0	0	0	0	0	0	0	0	0	0	FALSE
145407	ARMH4	0	1	0	0	0	0	0	0	0	0	0	0	0	0	0	0	0	1	FALSE
405	ARNT	0	0	0	0	0	0	0	0	0	0	0	0	0	0	0	0	0	0	FALSE
9915	ARNT2	0	0	0	0	0	0	0	0	0	0	0	0	0	0	0	0	0	0	FALSE
406	ARNTL	0	0	0	0	0	0	0	0	0	0	0	0	0	0	0	0	0	0	FALSE
56938	ARNTL2	0	0	0	0	0	0	0	0	0	0	0	0	0	0	0	0	0	0	FALSE
10552	ARPC1A	0	0	0	0	0	0	0	0	0	0	0	0	0	0	0	0	0	0	FALSE
10095	ARPC1B	0	0	0	0	0	0	0	0	0	0	0	0	0	0	0	0	0	0	FALSE
10109	ARPC2	0	0	0	0	0	0	0	0	0	0	0	0	0	0	0	0	0	0	FALSE
10094	ARPC3	0	0	0	0	0	0	0	0	0	0	0	0	0	0	0	0	0	0	FALSE
10093	ARPC4	0	0	0	0	0	0	0	0	0	0	0	0	0	0	0	0	0	0	FALSE
10092	ARPC5	0	0	0	0	0	0	0	0	0	0	0	0	0	0	0	0	0	0	FALSE
81873	ARPC5L	0	0	0	0	0	0	0	0	0	0	0	0	0	0	0	0	0	0	FALSE
348110	ARPIN	0	0	0	0	0	0	0	0	0	0	0	0	0	0	0	0	0	0	FALSE
10776	ARPP19	0	0	0	0	0	0	0	0	0	0	0	0	0	0	0	0	0	0	FALSE
10777	ARPP21	0	0	0	0	0	0	0	0	0	0	0	0	0	0	0	0	0	0	FALSE
407	ARR3	0	0	0	0	0	0	0	0	0	0	0	0	0	0	0	0	0	0	FALSE
408	ARRB1	0	0	0	0	0	0	0	0	0	0	0	0	0	0	0	0	0	0	FALSE
409	ARRB2	0	0	0	0	0	0	0	0	0	0	0	0	0	0	0	0	0	0	FALSE
92714	ARRDC1	0	0	0	0	0	0	0	0	0	0	0	0	0	0	0	0	0	0	FALSE
27106	ARRDC2	0	0	0	0	0	0	0	0	0	0	0	0	0	0	0	0	0	0	FALSE
91947	ARRDC4	0	0	0	0	0	0	0	0	0	0	0	0	0	0	0	0	0	0	FALSE
410	ARSA	0	0	0	0	0	0	0	0	0	0	0	0	0	0	0	0	0	0	FALSE
411	ARSB	0	0	0	0	0	0	0	0	0	0	0	0	0	0	0	0	0	0	FALSE
414	ARSD	0	0	0	0	0	0	0	0	0	0	0	0	0	0	0	0	0	0	FALSE
415	ARSE	0	0	0	0	0	0	0	0	0	0	0	0	0	0	0	0	0	0	FALSE
416	ARSF	0	0	0	0	0	0	0	0	0	0	0	0	0	0	0	0	0	0	FALSE
22901	ARSG	0	0	0	0	0	0	0	0	0	0	0	0	0	0	0	0	0	0	FALSE
347527	ARSH	0	0	0	0	0	0	0	0	0	0	0	0	0	0	0	0	0	0	FALSE
340075	ARSI	0	0	0	0	0	0	0	0	0	0	0	0	0	0	0	0	0	0	FALSE
79642	ARSJ	0	0	0	0	0	0	0	0	0	0	0	0	0	0	0	0	0	0	FALSE
153642	ARSK	0	0	0	0	0	0	0	0	0	0	0	0	0	0	0	0	0	0	FALSE
417	ART1	0	0	0	0	0	0	0	0	0	0	0	0	0	0	0	0	0	0	FALSE
419	ART3	0	0	0	0	0	0	0	0	0	0	0	0	0	0	0	0	0	0	FALSE
420	ART4	0	0	0	0	0	0	0	0	0	0	0	0	0	0	0	0	0	0	FALSE
116969	ART5	0	0	0	0	0	0	0	0	0	0	0	0	0	0	0	0	0	0	FALSE
64801	ARV1	0	0	0	0	0	0	0	0	0	0	0	0	0	0	0	0	0	0	FALSE
421	ARVCF	0	0	0	0	0	0	0	0	0	0	0	0	0	0	0	0	0	0	FALSE
170302	ARX	0	0	0	0	0	0	0	0	0	0	0	0	0	0	0	0	0	0	FALSE
57412	AS3MT	0	0	0	0	0	0	0	0	0	0	0	0	0	0	0	0	0	0	FALSE
56624	ASAH2	0	0	0	0	0	0	0	0	0	0	0	0	0	0	0	0	0	0	FALSE
50807	ASAP1	0	0	0	0	0	0	0	0	0	0	0	0	0	0	0	0	0	0	FALSE
8853	ASAP2	0	0	0	0	0	0	0	0	0	0	0	0	0	0	0	0	0	0	FALSE
55616	ASAP3	0	0	0	0	0	0	0	0	0	0	0	0	0	0	0	0	0	0	FALSE
51665	ASB1	0	0	0	0	0	0	0	0	0	0	0	0	0	0	0	0	0	0	FALSE
136371	ASB10	0	0	0	0	0	0	0	0	0	0	0	0	0	0	0	0	0	0	FALSE
140456	ASB11	0	0	0	0	0	0	0	0	0	0	0	0	0	0	0	0	0	0	FALSE
142689	ASB12	0	0	0	0	0	0	0	0	0	0	0	0	0	0	0	0	0	0	FALSE
79754	ASB13	0	0	0	0	0	0	0	0	0	0	0	0	0	0	0	0	0	0	FALSE
142686	ASB14	0	0	0	0	0	0	0	0	0	0	0	0	0	0	0	0	0	0	FALSE
142685	ASB15	0	0	0	0	0	0	0	0	0	0	0	0	0	0	0	0	0	0	FALSE
92591	ASB16	0	0	0	0	0	0	0	0	0	0	0	0	0	0	0	0	0	0	FALSE
127247	ASB17	0	0	0	0	0	0	0	0	0	0	0	0	0	0	0	0	0	0	FALSE
401036	ASB18	0	0	0	0	0	0	0	0	0	0	0	0	0	0	0	0	0	0	FALSE
51130	ASB3	0	0	0	0	0	0	0	0	0	0	0	0	0	0	0	0	0	0	FALSE
51666	ASB4	0	0	0	0	0	0	0	0	0	0	0	0	0	0	0	0	0	0	FALSE
140458	ASB5	0	0	0	0	0	0	0	0	0	0	0	0	0	0	0	0	0	0	FALSE
140459	ASB6	0	0	0	0	0	0	0	0	0	0	0	0	0	0	0	0	0	0	FALSE
140460	ASB7	0	0	0	0	0	0	0	0	0	0	0	0	0	0	0	0	0	0	FALSE
140461	ASB8	0	0	0	0	0	0	0	0	0	0	0	0	0	0	0	0	0	0	FALSE
140462	ASB9	0	0	0	0	0	0	0	0	0	0	0	0	0	0	0	0	0	0	FALSE
51008	ASCC1	0	0	0	0	0	0	0	0	0	0	0	0	0	0	0	0	0	0	FALSE
84164	ASCC2	0	0	0	0	0	0	0	0	0	0	0	0	0	0	0	0	0	0	FALSE
10973	ASCC3	0	0	0	0	0	0	0	0	0	0	0	0	0	0	0	0	0	0	FALSE
429	ASCL1	0	0	0	0	0	0	0	0	0	0	0	0	0	0	0	0	0	0	FALSE
430	ASCL2	0	0	0	0	0	0	0	0	0	0	0	0	0	0	0	0	0	0	FALSE
56676	ASCL3	0	0	0	0	0	0	0	0	0	0	0	0	0	0	0	0	0	0	FALSE
121549	ASCL4	0	0	0	0	0	0	0	0	0	0	0	0	0	0	0	0	0	0	FALSE
25842	ASF1A	0	0	0	0	0	0	0	0	0	0	0	0	0	0	0	0	0	0	FALSE
55723	ASF1B	0	0	0	0	0	0	0	0	0	0	0	0	0	0	0	0	0	0	FALSE
432	ASGR1	0	0	0	0	0	0	0	0	0	0	0	0	0	0	0	0	0	0	FALSE
433	ASGR2	0	0	0	0	0	0	0	0	0	0	0	0	0	0	0	0	0	0	FALSE
55870	ASH1L	0	0	0	0	0	0	0	0	0	0	0	0	0	0	0	0	0	0	FALSE
9070	ASH2L	0	0	1	1	0	1	0	0	1	1	0	0	0	0	0	0	0	5	FALSE
41	ASIC1	0	0	0	0	0	0	0	0	0	0	0	0	0	0	0	0	0	0	FALSE
40	ASIC2	0	0	0	0	0	0	0	0	0	0	0	0	0	0	0	0	0	0	FALSE
51802	ASIC5	0	0	0	0	0	0	0	0	0	0	0	0	0	0	0	0	0	0	FALSE
434	ASIP	0	0	0	0	0	0	0	0	0	0	0	0	0	0	0	0	0	0	FALSE
435	ASL	0	0	0	0	0	0	0	0	0	0	0	0	0	0	0	0	0	0	FALSE
438	ASMT	0	0	0	0	0	0	0	0	0	0	0	0	0	0	0	0	0	0	FALSE
8623	ASMTL	0	0	0	0	0	0	0	0	0	0	0	0	0	0	0	0	0	0	FALSE
439	ASNA1	0	0	0	0	0	0	0	0	0	0	0	0	0	0	0	0	0	0	FALSE
440	ASNS	0	0	0	0	0	0	0	0	0	0	0	0	0	0	0	0	0	0	FALSE
54529	ASNSD1	0	0	0	0	0	0	0	0	0	0	0	0	0	0	0	0	0	0	FALSE
443	ASPA	0	0	0	0	0	0	0	0	0	0	0	0	0	0	0	0	0	0	FALSE
444	ASPH	0	0	0	0	0	0	0	0	0	0	0	0	0	0	0	0	0	0	FALSE
253982	ASPHD1	0	0	0	0	0	0	0	0	0	0	0	0	0	0	0	0	0	0	FALSE
57168	ASPHD2	0	0	0	0	0	0	0	0	0	0	0	0	0	0	0	0	0	0	FALSE
259266	ASPM	0	0	0	0	0	0	0	0	0	0	0	0	0	0	0	0	0	0	FALSE
151516	ASPRV1	0	0	0	0	0	0	0	0	0	0	0	0	0	0	0	0	0	0	FALSE
80150	ASRGL1	0	0	0	0	0	0	0	0	0	0	0	0	0	0	0	0	0	0	FALSE
445	ASS1	0	0	0	0	0	0	0	0	0	0	0	0	0	0	0	0	0	0	FALSE
28990	ASTE1	0	0	0	0	0	0	0	0	0	0	0	0	0	0	0	0	0	0	FALSE
431705	ASTL	0	0	0	0	0	0	0	0	0	0	0	0	0	0	0	0	0	0	FALSE
460	ASTN1	0	0	0	0	0	0	0	0	0	0	0	0	0	0	0	0	0	0	FALSE
23245	ASTN2	0	0	0	0	0	0	0	0	0	0	0	0	0	0	0	0	0	0	FALSE
171023	ASXL1	0	0	0	0	0	0	0	0	0	0	0	0	0	0	0	0	0	0	FALSE
80816	ASXL3	0	0	0	0	0	0	0	0	0	0	0	0	0	0	0	0	0	0	FALSE
136991	ASZ1	0	0	0	0	0	0	0	0	0	0	0	0	0	0	0	0	0	0	FALSE
84896	ATAD1	0	0	0	0	0	0	0	0	0	0	0	0	0	0	0	0	0	0	FALSE
29028	ATAD2	0	0	0	0	0	0	0	0	0	0	0	0	0	0	0	0	0	0	FALSE
54454	ATAD2B	0	0	0	0	0	0	0	0	0	0	0	0	0	0	0	0	0	0	FALSE
55210	ATAD3A	0	0	0	0	0	0	0	0	0	0	0	0	0	0	0	0	0	0	FALSE
83858	ATAD3B	0	0	0	0	0	0	0	0	0	1	0	0	0	0	0	0	0	1	FALSE
219293	ATAD3C	0	0	0	0	0	0	0	0	0	0	0	0	0	0	0	0	0	0	FALSE
79915	ATAD5	0	0	0	0	0	0	0	0	0	0	0	0	0	0	0	0	0	0	FALSE
79969	ATAT1	0	0	0	0	0	0	0	0	0	0	0	0	0	0	0	0	0	0	FALSE
85300	ATCAY	0	0	0	0	0	0	0	0	0	0	0	0	0	0	0	0	0	0	FALSE
466	ATF1	0	0	0	0	0	0	0	0	0	0	0	0	0	0	0	0	0	0	FALSE
1386	ATF2	0	0	0	0	0	0	0	0	0	0	0	0	0	0	0	0	0	0	FALSE
467	ATF3	0	0	0	0	0	0	0	0	0	0	0	0	0	0	0	0	0	0	FALSE
468	ATF4	0	0	0	0	0	0	0	0	0	0	0	0	0	0	0	0	0	0	FALSE
22926	ATF6	0	0	0	0	0	0	0	0	0	0	0	0	0	0	0	0	0	0	FALSE
1388	ATF6B	0	0	0	0	0	0	0	0	0	0	0	0	0	0	0	0	0	0	FALSE
11016	ATF7	0	0	0	0	0	0	0	0	0	0	0	0	0	0	0	0	0	0	FALSE
55729	ATF7IP	0	0	0	0	0	0	0	0	0	0	0	0	0	0	0	0	0	0	FALSE
80063	ATF7IP2	0	0	0	0	0	0	0	0	0	0	0	0	0	0	0	0	0	0	FALSE
83734	ATG10	0	0	0	0	0	0	0	0	0	0	0	0	0	0	0	0	0	0	FALSE
60673	ATG101	0	0	0	0	0	0	0	0	0	0	0	0	0	0	0	0	0	0	FALSE
9140	ATG12	0	0	0	0	0	0	0	0	0	0	0	0	0	0	0	0	0	0	FALSE
9776	ATG13	0	0	0	0	0	0	0	0	0	0	0	0	0	0	0	0	0	0	FALSE
22863	ATG14	0	0	0	0	0	0	0	0	0	0	0	0	0	0	0	0	0	0	FALSE
55054	ATG16L1	0	0	0	0	0	0	0	0	0	0	0	0	0	0	0	0	0	0	FALSE
89849	ATG16L2	0	0	0	0	0	0	0	0	0	0	0	0	0	0	0	0	0	0	FALSE
23130	ATG2A	0	0	0	0	0	0	0	0	0	0	0	0	0	0	0	0	0	0	FALSE
55102	ATG2B	0	0	0	0	0	0	0	0	0	0	0	0	0	0	0	0	0	0	FALSE
64422	ATG3	0	0	0	0	0	0	0	0	0	0	0	0	0	0	0	0	0	0	FALSE
115201	ATG4A	0	0	0	0	0	0	0	0	0	0	0	0	0	0	0	0	0	0	FALSE
23192	ATG4B	0	0	0	0	0	0	0	0	0	0	0	0	0	0	0	0	0	0	FALSE
84938	ATG4C	0	0	0	0	0	0	0	0	0	0	0	0	0	0	0	0	0	0	FALSE
84971	ATG4D	0	0	0	0	0	0	0	0	0	0	0	0	0	0	0	0	0	0	FALSE
9474	ATG5	0	0	0	0	0	0	0	0	0	0	0	0	0	0	0	0	0	0	FALSE
10533	ATG7	0	0	0	0	0	0	0	0	0	0	0	0	0	0	0	0	0	0	FALSE
79065	ATG9A	0	0	0	0	0	0	0	0	0	0	0	0	0	0	0	0	0	0	FALSE
471	ATIC	0	0	0	0	0	0	0	0	0	0	0	0	0	0	0	0	0	0	FALSE
51062	ATL1	0	0	0	0	0	0	0	0	0	0	0	0	0	0	0	0	0	0	FALSE
64225	ATL2	0	0	0	0	0	0	0	0	0	0	0	0	0	0	0	0	0	0	FALSE
25923	ATL3	0	0	0	0	0	0	0	0	0	0	0	0	0	0	0	0	0	0	FALSE
472	ATM	0	0	0	0	0	0	0	0	0	0	0	0	0	0	0	0	0	0	FALSE
23300	ATMIN	0	0	0	0	0	0	0	0	0	0	0	0	0	0	0	0	0	0	FALSE
1822	ATN1	0	0	0	0	0	0	0	0	0	0	0	0	0	0	0	0	0	0	FALSE
474	ATOH1	0	0	0	0	0	0	0	0	0	0	0	0	0	0	0	0	0	0	FALSE
220202	ATOH7	0	0	0	0	0	0	0	0	0	0	0	0	0	0	0	0	0	0	FALSE
84913	ATOH8	0	0	0	0	0	0	0	0	0	0	0	0	0	0	0	0	0	0	FALSE
475	ATOX1	0	0	0	0	0	0	0	0	0	0	0	0	0	0	0	0	0	0	FALSE
57194	ATP10A	0	0	0	0	0	0	0	0	0	0	0	0	0	0	0	0	0	0	FALSE
23120	ATP10B	0	0	0	0	0	0	0	0	0	0	0	0	0	0	0	0	0	0	FALSE
57205	ATP10D	0	0	0	0	0	0	0	0	0	0	0	0	0	0	0	0	0	0	FALSE
23250	ATP11A	0	0	0	0	0	0	0	0	0	0	0	0	0	0	0	0	0	0	FALSE
23200	ATP11B	0	0	0	0	0	0	0	0	0	0	0	0	0	0	0	0	0	0	FALSE
286410	ATP11C	0	0	0	0	0	0	0	0	0	0	0	0	0	0	0	0	0	0	FALSE
479	ATP12A	0	0	0	0	0	0	0	0	0	0	0	0	0	0	0	0	0	0	FALSE
57130	ATP13A1	0	0	0	0	0	0	0	0	0	0	0	0	0	0	0	0	0	0	FALSE
23400	ATP13A2	0	0	0	0	0	0	0	0	0	0	0	0	0	0	0	0	0	0	FALSE
79572	ATP13A3	0	0	0	0	0	0	0	0	0	0	0	0	0	0	0	0	0	0	FALSE
84239	ATP13A4	0	0	0	0	0	0	0	0	0	0	0	0	0	0	0	0	0	0	FALSE
344905	ATP13A5	0	0	0	0	0	0	0	0	0	0	0	0	0	0	0	0	0	0	FALSE
476	ATP1A1	0	1	1	1	0	1	0	1	0	1	1	1	1	1	1	0	0	11	FALSE
477	ATP1A2	0	0	0	0	0	0	0	0	0	0	0	0	0	0	0	0	0	0	FALSE
478	ATP1A3	0	0	0	0	0	0	0	0	0	0	0	0	0	0	0	0	0	0	FALSE
480	ATP1A4	0	0	0	0	0	0	0	0	0	0	0	0	0	0	0	0	0	0	FALSE
481	ATP1B1	0	0	0	0	0	0	0	0	0	0	0	0	0	0	0	0	0	0	FALSE
482	ATP1B2	0	0	0	0	0	0	0	0	0	0	0	0	0	0	0	0	0	0	FALSE
483	ATP1B3	0	0	0	0	0	0	0	0	0	0	0	0	0	0	0	0	0	0	FALSE
23439	ATP1B4	0	0	0	0	0	0	0	0	0	0	0	0	0	0	0	0	0	0	FALSE
91419	ATP23	0	0	0	0	0	0	0	0	0	0	0	0	0	0	0	0	0	0	FALSE
488	ATP2A2	1	1	1	1	1	1	0	1	1	1	1	1	0	1	1	0	1	14	FALSE
489	ATP2A3	0	0	0	0	0	0	0	0	0	0	0	0	0	0	0	0	0	0	FALSE
490	ATP2B1	0	0	0	0	0	0	0	0	0	0	0	0	0	0	0	0	0	0	FALSE
491	ATP2B2	0	0	0	0	0	0	0	0	0	0	0	0	0	0	0	0	0	0	FALSE
492	ATP2B3	0	0	0	0	0	0	0	0	0	0	0	0	0	0	0	0	0	0	FALSE
493	ATP2B4	0	0	0	0	0	0	0	0	0	0	0	0	0	0	0	0	0	0	FALSE
27032	ATP2C1	0	0	0	0	0	0	0	0	0	0	0	0	0	0	0	0	0	0	FALSE
9914	ATP2C2	0	0	0	0	0	0	0	0	0	0	0	0	0	0	0	0	0	0	FALSE
495	ATP4A	0	0	0	0	0	0	0	0	0	0	0	0	0	0	0	0	0	0	FALSE
496	ATP4B	0	0	0	0	0	0	0	0	0	0	0	0	0	0	0	0	0	0	FALSE
498	ATP5F1A	0	0	0	0	0	0	0	0	0	1	0	0	0	0	0	0	0	1	FALSE
506	ATP5F1B	0	0	1	1	0	1	0	0	0	1	0	0	0	1	0	1	0	6	FALSE
509	ATP5F1C	0	0	0	0	0	0	0	0	0	1	0	0	0	0	0	0	0	1	FALSE
513	ATP5F1D	0	0	0	0	0	0	0	0	0	0	0	0	0	0	0	0	0	0	FALSE
514	ATP5F1E	0	0	0	0	0	0	0	0	0	0	0	0	0	0	0	0	0	0	FALSE
93974	ATP5IF1	0	0	0	0	0	0	0	0	0	0	0	0	0	0	0	0	0	0	FALSE
516	ATP5MC1	0	0	0	0	0	0	0	0	0	0	0	0	0	0	0	0	0	0	FALSE
517	ATP5MC2	0	0	0	0	0	0	0	0	0	0	0	0	0	0	0	0	0	0	FALSE
518	ATP5MC3	0	0	0	0	0	0	0	0	0	0	0	0	0	0	0	0	0	0	FALSE
84833	ATP5MD	0	0	0	0	0	0	0	0	0	0	0	0	0	0	0	0	0	0	FALSE
521	ATP5ME	0	0	0	0	0	0	0	0	0	1	0	0	0	0	0	0	0	1	FALSE
9551	ATP5MF	0	0	0	0	0	0	0	0	0	0	0	0	0	0	0	0	0	0	FALSE
10632	ATP5MG	0	0	0	0	0	0	0	0	0	0	0	0	0	0	0	0	0	0	FALSE
9556	ATP5MPL	0	0	0	0	0	0	0	0	0	0	0	0	0	0	0	0	0	0	FALSE
515	ATP5PB	0	0	0	0	0	0	0	0	0	0	0	0	0	0	0	0	0	0	FALSE
10476	ATP5PD	0	0	0	0	0	0	0	0	0	1	0	0	0	0	0	0	0	1	FALSE
522	ATP5PF	0	0	0	0	0	0	0	0	0	0	0	0	0	0	0	0	0	0	FALSE
539	ATP5PO	0	0	0	0	0	0	0	0	0	1	0	0	0	0	0	0	0	1	FALSE
27109	DMAC2L	0	0	0	0	0	0	0	0	0	0	0	0	0	0	0	0	0	0	FALSE
537	ATP6AP1	0	1	1	1	1	1	1	1	1	1	1	1	1	1	1	1	1	16	TRUE
92270	ATP6AP1L	0	0	0	0	0	0	0	0	0	0	0	0	0	0	0	0	0	0	FALSE
10159	ATP6AP2	1	0	1	1	0	1	1	1	1	1	0	1	1	0	1	0	1	12	FALSE
535	ATP6V0A1	0	0	0	0	0	0	0	0	0	0	0	0	0	0	0	0	0	0	FALSE
23545	ATP6V0A2	0	0	0	0	0	0	0	0	0	0	0	0	0	0	0	0	0	0	FALSE
50617	ATP6V0A4	0	0	0	0	0	0	0	0	0	0	0	0	0	0	0	0	0	0	FALSE
533	ATP6V0B	0	0	0	1	0	0	1	0	1	1	0	0	0	1	0	0	0	5	FALSE
527	ATP6V0C	1	1	1	1	1	1	1	1	1	1	1	1	1	1	1	1	1	17	TRUE
9114	ATP6V0D1	0	1	1	0	1	1	1	1	0	1	0	1	0	1	0	0	0	9	FALSE
245972	ATP6V0D2	0	0	0	0	0	0	0	0	0	0	0	0	0	0	0	0	0	0	FALSE
8992	ATP6V0E1	0	0	0	0	0	0	0	0	0	0	0	0	0	0	0	0	0	0	FALSE
155066	ATP6V0E2	0	0	0	0	0	0	0	0	0	0	0	0	0	0	0	0	0	0	FALSE
523	ATP6V1A	1	1	1	1	0	1	1	1	1	1	1	1	1	1	1	1	1	16	TRUE
525	ATP6V1B1	0	0	0	0	0	0	0	0	0	0	0	0	0	0	0	0	0	0	FALSE
526	ATP6V1B2	1	1	1	1	1	1	1	1	1	1	1	1	1	1	1	1	1	17	TRUE
528	ATP6V1C1	0	0	0	0	0	0	0	0	0	0	0	0	0	0	0	0	0	0	FALSE
245973	ATP6V1C2	0	0	0	0	0	0	0	0	0	0	0	0	0	0	0	0	0	0	FALSE
51382	ATP6V1D	0	0	0	0	0	0	0	0	0	0	0	0	0	0	0	0	0	0	FALSE
9296	ATP6V1F	0	0	0	0	0	0	0	0	0	0	1	0	0	0	0	0	0	1	FALSE
534	ATP6V1G2	0	0	0	0	0	0	0	0	0	0	0	0	0	0	0	0	0	0	FALSE
127124	ATP6V1G3	0	0	0	0	0	0	0	0	0	0	0	0	0	0	0	0	0	0	FALSE
51606	ATP6V1H	0	0	0	0	0	0	0	0	0	0	0	0	0	0	0	0	0	0	FALSE
538	ATP7A	0	0	0	0	0	0	0	0	0	0	0	0	0	0	0	0	0	0	FALSE
540	ATP7B	0	0	0	0	0	0	0	0	0	0	0	0	0	0	0	0	0	0	FALSE
10396	ATP8A1	0	0	0	0	0	0	0	0	0	0	0	0	0	0	0	0	0	0	FALSE
51761	ATP8A2	0	0	0	0	0	0	0	0	0	0	0	0	0	0	0	0	0	0	FALSE
5205	ATP8B1	0	0	0	0	0	0	0	0	0	0	0	0	0	0	0	0	0	0	FALSE
57198	ATP8B2	0	0	0	0	0	0	0	0	0	0	0	0	0	0	0	0	0	0	FALSE
148229	ATP8B3	0	0	0	0	0	0	0	0	0	0	0	0	0	0	0	0	0	0	FALSE
79895	ATP8B4	0	0	0	0	0	0	0	0	0	0	0	0	0	0	0	0	0	0	FALSE
10079	ATP9A	0	0	0	0	0	0	0	0	0	0	0	0	0	0	0	0	0	0	FALSE
374868	ATP9B	0	0	0	0	0	0	0	0	0	0	0	0	0	0	0	0	0	0	FALSE
64756	ATPAF1	0	0	0	0	0	0	0	0	0	0	0	0	0	0	0	0	0	0	FALSE
91647	ATPAF2	0	0	0	0	0	0	0	0	0	0	0	0	0	0	0	0	0	0	FALSE
545	ATR	1	1	1	0	0	1	0	0	0	1	0	1	0	1	1	0	1	9	FALSE
51374	ATRAID	0	0	0	0	0	0	0	0	0	0	0	0	0	0	0	0	0	0	FALSE
84126	ATRIP	0	0	0	0	0	0	0	0	0	0	0	0	0	0	0	0	0	0	FALSE
8455	ATRN	0	0	0	0	0	0	0	0	0	0	0	0	0	0	0	0	0	0	FALSE
26033	ATRNL1	0	0	0	0	0	0	0	0	0	0	0	0	0	0	0	0	0	0	FALSE
546	ATRX	0	0	0	0	0	0	0	0	0	0	0	0	0	0	0	0	0	0	FALSE
6310	ATXN1	0	0	0	0	0	0	0	0	0	0	0	0	0	0	0	0	0	0	FALSE
25814	ATXN10	0	0	0	0	0	0	0	0	0	0	0	0	0	0	0	0	0	0	FALSE
6311	ATXN2	0	0	0	0	0	0	0	0	0	0	0	0	0	0	0	0	0	0	FALSE
11273	ATXN2L	0	0	0	0	0	0	0	0	0	0	0	0	0	0	0	0	0	0	FALSE
4287	ATXN3	0	0	0	0	0	0	0	0	0	0	0	0	0	0	0	0	0	0	FALSE
6314	ATXN7	0	0	0	0	0	0	0	0	0	0	0	0	0	0	0	0	0	0	FALSE
222255	ATXN7L1	0	0	0	0	0	0	0	0	0	0	0	0	0	0	0	0	0	0	FALSE
127002	ATXN7L2	0	0	0	0	0	0	0	0	0	0	0	0	0	0	0	0	0	0	FALSE
549	AUH	0	0	0	0	0	0	0	0	0	0	0	0	0	0	0	0	0	0	FALSE
550	AUP1	0	0	0	0	0	0	0	0	0	0	0	0	0	0	0	0	0	0	FALSE
6790	AURKA	1	0	1	0	0	0	0	1	0	1	1	0	0	0	0	0	1	6	FALSE
54998	AURKAIP1	0	0	0	0	0	0	0	0	0	0	0	0	0	0	0	0	0	0	FALSE
9212	AURKB	1	1	1	1	1	1	1	1	1	1	1	1	1	1	1	1	1	17	TRUE
6795	AURKC	0	0	0	0	0	0	0	0	0	0	0	0	0	0	0	0	0	0	FALSE
26053	AUTS2	0	0	0	0	0	0	0	0	0	0	0	0	0	0	0	0	0	0	FALSE
57099	AVEN	0	0	0	0	0	0	0	0	0	0	0	0	0	0	0	0	0	0	FALSE
10677	AVIL	0	0	0	0	0	0	0	0	0	0	0	0	0	0	0	0	0	0	FALSE
23080	AVL9	0	0	0	0	0	0	0	0	0	0	0	0	0	0	0	0	0	0	FALSE
551	AVP	0	0	0	0	0	0	0	0	0	0	0	0	0	0	0	0	0	0	FALSE
60370	AVPI1	0	0	0	0	0	0	0	0	0	0	0	0	0	0	0	0	0	0	FALSE
552	AVPR1A	0	0	0	0	0	0	0	0	0	0	0	0	0	0	0	0	0	0	FALSE
553	AVPR1B	0	0	0	0	0	0	0	0	0	0	0	0	0	0	0	0	0	0	FALSE
554	AVPR2	0	0	0	0	0	0	0	0	0	0	0	0	0	0	0	0	0	0	FALSE
158833	AWAT1	0	0	0	0	0	0	0	0	0	0	0	0	0	0	0	0	0	0	FALSE
158835	AWAT2	0	0	0	0	0	0	0	0	0	0	0	0	0	0	0	0	0	0	FALSE
126859	AXDND1	0	0	0	0	0	0	0	0	0	0	0	0	0	0	0	0	0	0	FALSE
8312	AXIN1	0	0	0	0	0	0	0	0	0	0	0	0	0	0	0	0	0	0	FALSE
8313	AXIN2	0	0	0	0	0	0	0	0	0	0	0	0	0	0	0	0	0	0	FALSE
558	AXL	0	0	0	0	0	0	0	0	0	0	0	0	0	0	0	0	0	0	FALSE
563	AZGP1	0	0	0	0	0	0	0	0	0	0	0	0	0	0	0	0	0	0	FALSE
64343	AZI2	0	0	0	0	0	0	0	0	0	0	0	0	0	0	0	0	0	0	FALSE
51582	AZIN1	0	0	0	0	0	0	0	0	0	0	0	0	0	0	0	0	0	0	FALSE
113451	AZIN2	0	0	0	0	0	0	0	0	0	0	0	0	0	0	0	0	0	0	FALSE
566	AZU1	0	0	0	0	0	0	0	0	0	0	0	0	0	0	0	0	0	0	FALSE
567	B2M	0	0	0	0	0	0	0	0	0	0	0	0	0	0	0	0	0	0	FALSE
8706	B3GALNT1	0	0	0	0	0	0	0	0	0	0	0	0	0	0	0	0	0	0	FALSE
148789	B3GALNT2	0	0	0	0	0	0	0	0	0	0	0	0	0	0	0	0	0	0	FALSE
8708	B3GALT1	0	0	0	0	0	0	0	0	0	0	0	0	0	0	0	0	0	0	FALSE
8707	B3GALT2	0	0	0	0	0	0	0	0	0	0	0	0	0	0	0	0	0	0	FALSE
8705	B3GALT4	0	0	0	0	0	0	0	0	0	0	0	0	0	0	0	0	0	0	FALSE
10317	B3GALT5	0	0	0	0	0	0	0	0	0	0	0	0	0	0	0	0	0	0	FALSE
126792	B3GALT6	0	0	0	0	0	0	0	0	0	0	0	0	0	0	0	0	0	0	FALSE
27087	B3GAT1	0	0	0	0	0	0	0	0	0	0	0	0	0	0	0	0	0	0	FALSE
135152	B3GAT2	0	0	0	0	0	0	0	0	0	0	0	0	0	0	0	0	0	0	FALSE
26229	B3GAT3	0	0	0	0	0	0	0	0	0	0	0	0	0	0	0	0	0	0	FALSE
145173	B3GLCT	0	0	0	0	0	0	0	0	0	0	0	0	0	0	0	0	0	0	FALSE
10678	B3GNT2	0	0	0	0	0	0	0	0	0	0	0	0	0	0	0	0	0	0	FALSE
10331	B3GNT3	0	0	0	0	0	0	0	0	0	0	0	0	0	0	0	0	0	0	FALSE
79369	B3GNT4	0	0	0	0	0	0	0	0	0	0	0	0	0	0	0	0	0	0	FALSE
84002	B3GNT5	0	0	0	0	0	0	0	0	0	0	0	0	0	0	0	0	0	0	FALSE
192134	B3GNT6	0	0	0	0	0	0	0	0	0	0	0	0	0	0	0	0	0	0	FALSE
374907	B3GNT8	0	0	0	0	0	0	0	0	0	0	0	0	0	0	0	0	0	0	FALSE
146712	B3GNTL1	0	0	0	0	0	0	0	0	0	0	0	0	0	0	0	0	0	0	FALSE
2583	B4GALNT1	0	0	0	0	0	0	0	0	0	0	0	0	0	0	0	0	0	0	FALSE
124872	B4GALNT2	0	0	0	0	0	0	0	0	0	0	0	0	0	0	0	0	0	0	FALSE
283358	B4GALNT3	0	0	0	0	0	0	0	0	0	0	0	0	0	0	0	0	0	0	FALSE
338707	B4GALNT4	0	0	0	0	0	0	0	0	0	0	0	0	0	0	0	0	0	0	FALSE
2683	B4GALT1	0	0	0	0	0	0	0	0	0	0	0	0	0	0	0	0	0	0	FALSE
8704	B4GALT2	0	0	0	0	0	0	0	0	0	0	0	0	0	0	0	0	0	0	FALSE
8703	B4GALT3	0	0	0	0	0	0	0	0	0	0	0	0	0	0	0	0	0	0	FALSE
8702	B4GALT4	0	0	0	0	0	0	0	0	0	0	0	0	0	0	0	0	0	0	FALSE
9334	B4GALT5	0	0	0	0	0	0	0	0	0	0	0	0	0	0	0	0	0	0	FALSE
11285	B4GALT7	0	0	0	0	0	0	0	0	0	0	0	0	0	0	0	0	0	0	FALSE
27077	B9D1	0	0	0	0	0	0	0	0	0	0	0	0	0	0	0	0	0	0	FALSE
79870	BAALC	0	0	0	0	0	0	0	0	0	0	0	0	0	0	0	0	0	0	FALSE
570	BAAT	0	0	0	0	0	0	0	0	0	0	0	0	0	0	0	0	0	0	FALSE
9577	BABAM2	0	0	0	0	0	0	0	0	0	0	0	0	0	0	0	0	0	0	FALSE
23621	BACE1	0	0	0	0	0	0	0	0	0	0	0	0	0	0	0	0	0	0	FALSE
25825	BACE2	0	0	0	0	0	0	0	0	0	0	0	0	0	0	0	0	0	0	FALSE
571	BACH1	0	0	0	0	0	0	0	0	0	0	0	0	0	0	0	0	0	0	FALSE
60468	BACH2	0	0	0	0	0	0	0	0	0	0	0	0	0	0	0	0	0	0	FALSE
572	BAD	0	0	0	0	0	0	0	0	0	0	0	0	0	0	0	0	0	0	FALSE
573	BAG1	0	0	0	0	0	0	0	0	0	0	0	0	0	0	0	0	0	0	FALSE
9532	BAG2	0	0	0	0	0	0	0	0	0	0	0	0	0	0	0	0	0	0	FALSE
9531	BAG3	0	0	0	0	0	0	0	0	0	0	0	0	0	0	0	0	0	0	FALSE
9530	BAG4	0	0	0	0	0	0	0	0	0	0	0	0	0	0	0	0	0	0	FALSE
9529	BAG5	0	0	0	0	0	0	0	0	0	0	0	0	0	0	0	0	0	0	FALSE
7917	BAG6	0	0	0	0	0	0	0	0	0	0	0	0	0	0	0	0	0	0	FALSE
22893	BAHD1	0	0	0	0	0	0	0	0	0	0	0	0	0	0	0	0	0	0	FALSE
10458	BAIAP2	0	0	0	0	0	0	0	0	0	0	0	0	0	0	0	0	0	0	FALSE
55971	BAIAP2L1	0	0	0	0	0	0	0	0	0	0	0	0	0	0	0	0	0	0	FALSE
80115	BAIAP2L2	0	0	0	0	0	0	0	0	0	0	0	0	0	0	0	0	0	0	FALSE
8938	BAIAP3	0	0	0	0	0	0	0	0	0	0	0	0	0	0	0	0	0	0	FALSE
578	BAK1	0	0	0	0	0	0	0	0	0	0	0	0	0	0	0	0	0	0	FALSE
25805	BAMBI	0	0	0	0	0	0	0	0	0	0	0	0	0	0	0	0	0	0	FALSE
8815	BANF1	1	1	1	1	1	1	1	1	0	1	1	1	0	1	1	0	1	14	FALSE
140836	BANF2	0	0	0	0	0	0	0	0	0	0	0	0	0	0	0	0	0	0	FALSE
55024	BANK1	0	0	0	0	0	0	0	0	0	0	0	0	0	0	0	0	0	0	FALSE
8314	BAP1	0	0	0	0	0	0	0	0	0	0	0	0	0	0	0	0	0	0	FALSE
580	BARD1	0	0	0	0	0	0	0	0	0	0	0	0	0	0	0	0	0	0	FALSE
343472	BARHL2	0	0	0	0	0	0	0	0	0	0	0	0	0	0	0	0	0	0	FALSE
56033	BARX1	0	0	0	0	0	0	0	0	0	0	0	0	0	0	0	0	0	0	FALSE
8538	BARX2	0	0	0	0	0	0	0	0	0	0	0	0	0	0	0	0	0	0	FALSE
10409	BASP1	0	0	0	0	0	0	0	0	0	0	0	0	0	0	0	0	0	0	FALSE
10538	BATF	0	0	0	0	0	0	0	0	0	0	0	0	0	0	0	0	0	0	FALSE
116071	BATF2	0	0	0	0	0	0	0	0	0	0	0	0	0	0	0	0	0	0	FALSE
55509	BATF3	0	0	0	0	0	0	0	0	0	0	0	0	0	0	0	0	0	0	FALSE
581	BAX	0	0	0	0	0	0	0	0	0	0	0	0	0	0	0	0	0	0	FALSE
11177	BAZ1A	0	0	0	0	0	0	0	0	0	0	0	0	0	0	0	0	0	0	FALSE
9031	BAZ1B	0	0	0	0	0	0	0	0	0	0	0	0	0	0	0	0	0	0	FALSE
11176	BAZ2A	0	0	0	0	0	0	0	0	0	0	0	0	0	0	0	0	0	0	FALSE
29994	BAZ2B	0	0	0	0	0	0	0	0	0	0	0	0	0	0	0	0	0	0	FALSE
27113	BBC3	0	0	0	0	0	0	0	0	0	0	0	0	0	0	0	0	0	0	FALSE
8424	BBOX1	0	0	0	0	0	0	0	0	0	0	0	0	0	0	0	0	0	0	FALSE
582	BBS1	0	0	0	0	0	0	0	0	0	0	0	0	0	0	0	0	0	0	FALSE
583	BBS2	0	0	0	0	0	0	0	0	0	0	0	0	0	0	0	0	0	0	FALSE
585	BBS4	0	0	0	0	0	0	0	0	0	0	0	0	0	0	0	0	0	0	FALSE
129880	BBS5	0	0	0	0	0	0	0	0	0	0	0	0	0	0	0	0	0	0	FALSE
55212	BBS7	0	0	0	0	0	0	0	0	0	0	0	0	0	0	0	0	0	0	FALSE
27241	BBS9	0	0	0	0	0	0	0	0	0	0	0	0	0	0	0	0	0	0	FALSE
56987	BBX	0	0	0	0	0	0	0	0	0	0	0	0	0	0	0	0	0	0	FALSE
4059	BCAM	0	0	0	0	0	0	0	0	0	0	0	0	0	0	0	0	0	0	FALSE
63827	BCAN	0	0	0	0	0	0	0	0	0	0	0	0	0	0	0	0	0	0	FALSE
55973	BCAP29	0	0	0	0	0	0	0	0	0	0	0	0	0	0	0	0	0	0	FALSE
9564	BCAR1	0	0	0	0	0	0	0	0	0	0	0	0	0	0	0	0	0	0	FALSE
8412	BCAR3	0	0	0	0	0	0	0	0	0	0	0	0	0	0	0	0	0	0	FALSE
8537	BCAS1	0	0	0	0	0	0	0	0	0	0	0	0	0	0	0	0	0	0	FALSE
10286	BCAS2	0	0	0	0	0	0	0	0	0	0	0	0	0	0	0	0	0	0	FALSE
54828	BCAS3	0	0	0	0	0	0	0	0	0	0	0	0	0	0	0	0	0	0	FALSE
55653	BCAS4	0	0	0	0	0	0	0	0	0	0	0	0	0	0	0	0	0	0	FALSE
586	BCAT1	0	0	0	0	0	0	0	0	0	0	0	0	0	0	0	0	0	0	FALSE
587	BCAT2	0	0	0	0	0	0	0	0	0	0	0	0	0	0	0	0	0	0	FALSE
56647	BCCIP	0	1	0	0	0	0	0	0	0	0	0	0	0	1	0	0	0	2	FALSE
144233	BCDIN3D	0	0	0	0	0	0	0	0	0	0	0	0	0	0	0	0	0	0	FALSE
590	BCHE	0	0	0	0	0	0	0	0	0	0	0	0	0	0	0	0	0	0	FALSE
593	BCKDHA	0	0	0	0	0	0	0	0	0	0	0	0	0	0	0	0	0	0	FALSE
594	BCKDHB	0	0	0	0	0	0	0	0	0	0	0	0	0	0	0	0	0	0	FALSE
10295	BCKDK	0	0	0	0	0	0	0	0	0	0	0	0	0	0	0	0	0	0	FALSE
8915	BCL10	0	0	0	0	0	0	0	0	0	0	0	0	0	0	0	0	0	0	FALSE
53335	BCL11A	0	0	0	0	0	0	0	0	0	0	0	0	0	0	0	0	0	0	FALSE
64919	BCL11B	0	0	0	0	0	0	0	0	0	0	0	0	0	0	0	0	0	0	FALSE
596	BCL2	0	0	0	0	0	0	0	0	0	0	0	0	0	0	0	0	0	0	FALSE
597	BCL2A1	0	0	0	0	0	0	0	0	0	0	0	0	0	0	0	0	0	0	FALSE
598	BCL2L1	0	0	0	0	0	0	0	0	0	0	0	0	0	0	0	0	0	0	FALSE
10017	BCL2L10	0	0	0	0	0	0	0	0	0	0	0	0	0	0	0	0	0	0	FALSE
10018	BCL2L11	0	0	0	0	0	0	0	0	0	0	0	0	0	0	0	0	0	0	FALSE
83596	BCL2L12	0	0	0	0	0	0	0	0	0	0	0	0	0	0	0	0	0	0	FALSE
23786	BCL2L13	0	0	0	0	0	0	0	0	0	0	0	0	0	0	0	0	0	0	FALSE
79370	BCL2L14	0	0	0	0	0	0	0	0	0	0	0	0	0	0	0	0	0	0	FALSE
599	BCL2L2	0	0	0	0	0	0	0	0	0	0	0	0	0	0	0	0	0	0	FALSE
602	BCL3	0	0	0	0	0	0	0	0	0	0	0	0	0	0	0	0	0	0	FALSE
604	BCL6	0	0	0	0	0	0	0	0	0	0	0	0	0	0	0	0	0	0	FALSE
255877	BCL6B	0	0	0	0	0	0	0	0	0	0	0	0	0	0	0	0	0	0	FALSE
605	BCL7A	0	0	0	0	0	0	0	0	0	0	0	0	0	0	0	0	0	0	FALSE
9275	BCL7B	0	0	0	0	0	0	0	0	0	0	0	0	0	0	0	0	0	0	FALSE
9274	BCL7C	0	0	0	0	0	0	0	0	0	0	0	0	0	0	0	0	0	0	FALSE
607	BCL9	0	0	0	0	0	0	0	0	0	0	0	0	0	0	0	0	0	0	FALSE
283149	BCL9L	0	0	0	0	0	0	0	0	0	0	0	0	0	0	0	0	0	0	FALSE
9774	BCLAF1	0	0	0	0	0	0	0	0	0	1	1	0	0	0	0	0	0	2	FALSE
256643	BCLAF3	0	0	0	0	0	0	0	0	0	0	0	0	0	0	0	0	0	0	FALSE
53630	BCO1	0	0	0	0	0	0	0	0	0	0	0	0	0	0	0	0	0	0	FALSE
83875	BCO2	0	0	0	0	0	0	0	0	0	0	0	0	0	0	0	0	0	0	FALSE
54880	BCOR	0	0	0	0	0	0	0	0	0	0	0	0	0	0	0	0	0	0	FALSE
63035	BCORL1	0	0	0	0	0	0	0	0	0	0	0	0	0	0	0	0	0	0	FALSE
613	BCR	0	0	0	0	0	0	0	0	0	0	0	0	0	0	0	0	0	0	FALSE
617	BCS1L	0	0	0	0	0	0	0	0	0	0	0	0	0	0	0	0	0	0	FALSE
622	BDH1	0	0	0	0	0	0	0	0	0	0	0	0	0	0	0	0	0	0	FALSE
56898	BDH2	0	0	0	0	0	0	0	0	0	0	0	0	0	0	0	0	0	0	FALSE
623	BDKRB1	0	0	0	0	0	0	0	0	0	0	0	0	0	0	0	0	0	0	FALSE
624	BDKRB2	0	0	0	0	0	0	0	0	0	0	0	0	0	0	0	0	0	0	FALSE
627	BDNF	0	0	0	0	0	0	0	0	0	0	0	0	0	0	0	0	0	0	FALSE
55814	BDP1	0	0	0	0	0	0	0	0	0	0	0	0	0	0	0	0	0	0	FALSE
8678	BECN1	0	0	0	0	0	0	0	0	0	0	0	0	0	0	0	0	0	0	FALSE
57596	BEGAIN	0	0	0	0	0	0	0	0	0	0	0	0	0	0	0	0	0	0	FALSE
139105	BEND2	0	0	0	0	0	0	0	0	0	0	0	0	0	0	0	0	0	0	FALSE
79656	BEND5	0	0	0	0	0	0	0	0	0	0	0	0	0	0	0	0	0	0	FALSE
221336	BEND6	0	0	0	0	0	0	0	0	0	0	0	0	0	0	0	0	0	0	FALSE
7439	BEST1	0	0	0	0	0	0	0	0	0	0	0	0	0	0	0	0	0	0	FALSE
54831	BEST2	0	0	0	0	0	0	0	0	0	0	0	0	0	0	0	0	0	0	FALSE
144453	BEST3	0	0	0	0	0	0	0	0	0	0	0	0	0	0	0	0	0	0	FALSE
266675	BEST4	0	0	0	0	0	0	0	0	0	0	0	0	0	0	0	0	0	0	FALSE
10282	BET1	0	0	0	0	0	0	0	0	0	0	0	0	0	0	0	0	0	0	FALSE
55859	BEX1	0	0	0	0	0	0	0	0	0	0	0	0	0	0	0	0	0	0	FALSE
84707	BEX2	0	0	0	0	0	0	0	0	0	0	0	0	0	0	0	0	0	0	FALSE
27018	BEX3	0	0	0	0	0	0	0	0	0	0	0	0	0	0	0	0	0	0	FALSE
340542	BEX5	0	0	0	0	0	0	0	0	0	0	0	0	0	0	0	0	0	0	FALSE
51283	BFAR	0	0	0	0	0	0	0	0	0	0	0	0	0	0	0	0	0	0	FALSE
631	BFSP1	0	0	0	0	0	0	0	0	0	0	0	0	0	0	0	0	0	0	FALSE
8419	BFSP2	0	0	0	0	0	0	0	0	0	0	0	0	0	0	0	0	0	0	FALSE
632	BGLAP	0	0	0	0	0	0	0	0	0	0	0	0	0	0	0	0	0	0	FALSE
633	BGN	0	0	0	0	0	0	0	0	0	0	0	0	0	0	0	0	0	0	FALSE
168620	BHLHA15	0	0	0	0	0	0	0	0	0	0	0	0	0	0	0	0	0	0	FALSE
80823	BHLHB9	0	0	0	0	0	0	0	0	0	0	0	0	0	0	0	0	0	0	FALSE
27319	BHLHE22	0	0	0	0	0	0	0	0	0	0	0	0	0	0	0	0	0	0	FALSE
128408	BHLHE23	0	0	0	0	0	0	0	0	0	0	0	0	0	0	0	0	0	0	FALSE
8553	BHLHE40	0	0	0	0	0	0	0	0	0	0	0	0	0	0	0	0	0	0	FALSE
79365	BHLHE41	0	0	0	0	0	0	0	0	0	0	0	0	0	0	0	0	0	0	FALSE
635	BHMT	0	0	0	0	0	0	0	0	0	0	0	0	0	0	0	0	0	0	FALSE
23743	BHMT2	0	0	0	0	0	0	0	0	0	0	0	0	0	0	0	0	0	0	FALSE
80114	BICC1	0	0	0	0	0	0	0	0	0	0	0	0	0	0	0	0	0	0	FALSE
636	BICD1	0	0	0	0	0	0	0	0	0	0	0	0	0	0	0	0	0	0	FALSE
23299	BICD2	0	0	0	0	0	0	0	0	0	0	0	0	0	0	0	0	0	0	FALSE
92558	BICDL1	0	0	0	0	0	0	0	0	0	0	0	0	0	0	0	0	0	0	FALSE
29998	BICRA	0	0	0	0	0	0	0	0	0	0	0	0	0	0	0	0	0	0	FALSE
637	BID	0	0	0	0	0	0	0	0	0	0	0	0	0	0	0	0	0	0	FALSE
638	BIK	0	0	0	0	0	0	0	0	0	0	0	0	0	0	0	0	0	0	FALSE
274	BIN1	0	0	0	0	0	0	0	0	0	0	0	0	0	0	0	0	0	0	FALSE
51411	BIN2	0	0	0	0	0	0	0	0	0	0	0	0	0	0	0	0	0	0	FALSE
55909	BIN3	0	0	0	0	0	0	0	0	0	0	0	0	0	0	0	0	0	0	FALSE
329	BIRC2	0	0	0	0	0	0	0	0	0	0	0	0	0	0	0	0	0	0	FALSE
330	BIRC3	0	0	0	0	0	0	0	0	0	0	0	0	0	0	0	0	0	0	FALSE
332	BIRC5	1	1	1	1	1	1	1	1	1	1	1	1	1	1	1	1	1	17	TRUE
57448	BIRC6	0	0	0	0	0	0	0	0	0	0	0	0	0	0	0	0	0	0	FALSE
79444	BIRC7	0	0	0	0	0	0	0	0	0	0	0	0	0	0	0	0	0	0	FALSE
112401	BIRC8	0	0	0	0	0	0	0	0	0	0	0	0	0	0	0	0	0	0	FALSE
54841	BIVM	0	0	0	0	0	0	0	0	0	0	0	0	0	0	0	0	0	0	FALSE
10904	BLCAP	0	0	0	0	0	0	0	0	0	0	0	0	0	0	0	0	0	0	FALSE
640	BLK	0	0	0	0	0	0	0	0	0	0	0	0	0	0	0	0	0	0	FALSE
641	BLM	0	0	0	0	0	0	0	0	0	0	0	0	0	0	0	0	0	0	FALSE
642	BLMH	0	0	0	0	0	0	0	0	0	0	0	0	0	0	0	0	0	0	FALSE
29760	BLNK	0	0	0	0	0	0	0	0	0	0	0	0	0	0	0	0	0	0	FALSE
2647	BLOC1S1	0	0	0	0	0	0	0	0	0	0	0	0	0	0	0	0	0	0	FALSE
282991	BLOC1S2	0	0	0	0	0	0	0	0	0	0	0	0	0	0	0	0	0	0	FALSE
55330	BLOC1S4	0	0	0	0	0	0	0	0	0	0	0	0	0	0	0	0	0	0	FALSE
63915	BLOC1S5	0	0	0	0	0	0	0	0	0	0	0	0	0	0	0	0	0	0	FALSE
26258	BLOC1S6	0	0	0	0	0	0	0	0	0	0	0	0	0	0	0	0	0	0	FALSE
644	BLVRA	0	0	0	0	0	0	0	0	0	0	0	0	0	0	0	0	0	0	FALSE
645	BLVRB	0	0	0	0	0	0	0	0	0	0	0	0	0	0	0	0	0	0	FALSE
8548	BLZF1	0	0	0	0	0	0	0	0	0	0	0	0	0	0	0	0	0	0	FALSE
90427	BMF	0	0	0	0	0	0	0	0	0	0	0	0	0	0	0	0	0	0	FALSE
648	BMI1	0	0	0	0	0	0	0	0	0	0	0	0	0	0	0	0	0	0	FALSE
649	BMP1	0	0	0	0	0	0	0	0	0	0	0	0	0	0	0	0	0	0	FALSE
27302	BMP10	0	0	0	0	0	0	0	0	0	0	0	0	0	0	0	0	0	0	FALSE
9210	BMP15	0	0	0	0	0	0	0	0	0	0	0	0	0	0	0	0	0	0	FALSE
650	BMP2	0	0	0	0	0	0	0	0	0	0	0	0	0	0	0	0	0	0	FALSE
55589	BMP2K	0	0	0	0	0	0	0	0	0	0	0	0	0	0	0	0	0	0	FALSE
651	BMP3	0	0	0	0	0	0	0	0	0	0	0	0	0	0	0	0	0	0	FALSE
652	BMP4	0	0	0	0	0	0	0	0	0	0	0	0	0	0	0	0	0	0	FALSE
653	BMP5	0	0	0	0	0	0	0	0	0	0	0	0	0	0	0	0	0	0	FALSE
654	BMP6	0	0	0	0	0	0	0	0	0	0	0	0	0	0	0	0	0	0	FALSE
353500	BMP8A	0	0	0	0	0	0	0	0	0	0	0	0	0	0	0	0	0	0	FALSE
656	BMP8B	0	0	0	0	0	0	0	0	0	0	0	0	0	0	0	0	0	0	FALSE
168667	BMPER	0	0	0	0	0	0	0	0	0	0	0	0	0	0	0	0	0	0	FALSE
657	BMPR1A	0	0	0	0	0	0	0	0	0	0	0	0	0	0	0	0	0	0	FALSE
658	BMPR1B	0	0	0	0	0	0	0	0	0	0	0	0	0	0	0	0	0	0	FALSE
659	BMPR2	0	0	0	0	0	0	0	0	0	0	0	0	0	0	0	0	0	0	FALSE
9790	BMS1	0	0	1	1	1	0	0	1	0	1	1	1	0	1	0	0	1	9	FALSE
154743	BMT2	0	0	0	0	0	0	0	0	0	0	0	0	0	0	0	0	0	0	FALSE
660	BMX	0	0	0	0	0	0	0	0	0	0	0	0	0	0	0	0	0	0	FALSE
646	BNC1	0	0	0	0	0	0	0	0	0	0	0	0	0	0	0	0	0	0	FALSE
54796	BNC2	0	0	0	0	0	0	0	0	0	0	0	0	0	0	0	0	0	0	FALSE
662	BNIP1	0	0	0	0	0	0	0	0	0	0	0	0	0	0	0	0	0	0	FALSE
663	BNIP2	0	0	0	0	0	0	0	0	0	0	0	0	0	0	0	0	0	0	FALSE
664	BNIP3	0	0	0	0	0	0	0	0	0	0	0	0	0	0	0	0	0	0	FALSE
149428	BNIPL	0	0	0	0	0	0	0	0	0	0	0	0	0	0	0	0	0	0	FALSE
91653	BOC	0	0	0	0	0	0	0	0	0	0	0	0	0	0	0	0	0	0	FALSE
666	BOK	0	0	0	0	0	0	0	0	0	0	0	0	0	0	0	0	0	0	FALSE
51027	BOLA1	0	0	0	0	0	0	0	0	0	0	0	0	0	0	0	0	0	0	FALSE
388962	BOLA3	0	0	0	0	0	0	0	0	0	0	0	0	0	0	0	0	0	0	FALSE
66037	BOLL	0	0	0	0	0	0	0	0	0	0	0	0	0	0	0	0	0	0	FALSE
23246	BOP1	1	1	1	1	1	1	1	1	1	1	1	1	1	1	1	1	1	17	TRUE
79866	BORA	0	0	0	0	0	0	0	0	0	0	0	0	0	0	0	0	0	0	FALSE
118426	BORCS5	0	0	0	0	0	0	0	0	0	0	0	0	0	0	0	0	0	0	FALSE
119032	BORCS7	0	0	0	0	0	0	0	0	0	0	0	0	0	0	0	0	0	0	FALSE
669	BPGM	0	0	0	0	0	0	0	0	0	0	0	0	0	0	0	0	0	0	FALSE
670	BPHL	0	0	0	0	0	0	0	0	0	0	0	0	0	0	0	0	0	0	FALSE
671	BPI	0	0	0	0	0	0	0	0	0	0	0	0	0	0	0	0	0	0	FALSE
51297	BPIFA1	0	0	0	0	0	0	0	0	0	0	0	0	0	0	0	0	0	0	FALSE
140683	BPIFA2	0	0	0	0	0	0	0	0	0	0	0	0	0	0	0	0	0	0	FALSE
128861	BPIFA3	0	0	0	0	0	0	0	0	0	0	0	0	0	0	0	0	0	0	FALSE
92747	BPIFB1	0	0	0	0	0	0	0	0	0	0	0	0	0	0	0	0	0	0	FALSE
359710	BPIFB3	0	0	0	0	0	0	0	0	0	0	0	0	0	0	0	0	0	0	FALSE
128859	BPIFB6	0	0	0	0	0	0	0	0	0	0	0	0	0	0	0	0	0	0	FALSE
254240	BPIFC	0	0	0	0	0	0	0	0	0	0	0	0	0	0	0	0	0	0	FALSE
10380	BPNT1	0	0	0	0	0	0	0	0	0	0	0	0	0	0	0	0	0	0	FALSE
2186	BPTF	0	0	0	0	0	0	0	0	0	0	0	0	0	0	0	0	0	0	FALSE
673	BRAF	0	0	0	0	0	0	0	0	0	0	0	0	0	1	0	0	0	1	FALSE
8315	BRAP	0	0	0	0	0	0	0	0	0	0	0	0	0	0	0	0	0	0	FALSE
672	BRCA1	0	0	0	0	0	0	0	0	0	0	0	0	0	0	0	0	0	0	FALSE
675	BRCA2	0	0	0	0	0	0	0	0	0	0	0	0	0	0	0	0	0	0	FALSE
79184	BRCC3	0	0	0	0	0	0	0	0	0	0	0	0	0	0	0	0	0	0	FALSE
23774	BRD1	0	0	0	0	0	0	0	0	0	0	0	0	0	0	0	0	0	0	FALSE
6046	BRD2	0	0	0	0	0	0	0	0	0	0	0	0	0	0	0	0	0	0	FALSE
8019	BRD3	0	0	0	0	0	0	0	0	0	0	0	0	0	0	0	0	0	0	FALSE
23476	BRD4	1	1	1	1	1	0	0	1	1	1	1	1	1	1	1	1	1	15	TRUE
29117	BRD7	0	0	0	0	0	0	0	0	0	0	0	0	0	0	0	0	0	0	FALSE
10902	BRD8	0	0	0	0	0	0	0	0	0	0	0	0	0	0	0	0	0	0	FALSE
65980	BRD9	0	0	0	0	0	0	0	0	0	0	0	0	0	0	0	0	0	0	FALSE
676	BRDT	0	0	0	0	0	0	0	0	0	0	0	0	0	0	0	0	0	0	FALSE
2972	BRF1	0	0	0	0	0	0	0	0	0	0	0	0	0	0	0	0	0	0	FALSE
55290	BRF2	0	0	0	0	0	0	0	0	0	0	0	0	0	0	0	0	0	0	FALSE
25798	BRI3	0	0	0	0	0	0	0	0	0	0	0	0	0	0	0	0	0	0	FALSE
57795	BRINP2	0	0	0	0	0	0	0	0	0	0	0	0	0	0	0	0	0	0	FALSE
339479	BRINP3	0	0	0	0	0	0	0	0	0	0	0	0	0	0	0	0	0	0	FALSE
83990	BRIP1	0	0	0	0	0	0	0	0	0	0	0	0	0	0	0	0	0	0	FALSE
55299	BRIX1	1	0	1	1	0	1	1	0	0	1	0	1	0	1	0	0	0	8	FALSE
55845	BRK1	0	0	0	0	0	0	0	0	0	0	0	0	0	0	0	0	0	0	FALSE
25855	BRMS1	0	0	0	0	0	0	0	0	0	0	0	0	0	0	0	0	0	0	FALSE
84312	BRMS1L	0	0	0	0	0	0	0	0	0	0	0	0	0	0	0	0	0	0	FALSE
148362	BROX	0	0	0	0	0	0	0	0	0	0	0	0	0	0	0	0	0	0	FALSE
7862	BRPF1	0	0	0	0	0	0	0	0	0	0	0	0	0	0	0	0	0	0	FALSE
27154	BRPF3	0	0	0	0	0	0	0	0	0	0	0	0	0	0	0	0	0	0	FALSE
680	BRS3	0	0	0	0	0	0	0	0	0	0	0	0	0	0	0	0	0	0	FALSE
84446	BRSK1	0	0	0	0	0	0	0	0	0	0	0	0	0	0	0	0	0	0	FALSE
9024	BRSK2	0	0	0	0	0	0	0	0	0	0	0	0	0	0	0	0	0	0	FALSE
54014	BRWD1	0	0	0	0	0	0	0	0	0	0	0	0	0	0	0	0	0	0	FALSE
254065	BRWD3	0	0	0	0	0	0	0	0	0	0	0	0	0	0	0	0	0	0	FALSE
26580	BSCL2	0	0	0	0	0	0	0	0	0	0	0	0	0	0	0	0	0	0	FALSE
55108	BSDC1	0	0	0	0	0	0	0	0	0	0	0	0	0	0	0	0	0	0	FALSE
682	BSG	0	0	0	0	0	0	0	0	0	0	0	0	0	0	0	0	0	0	FALSE
8927	BSN	0	0	0	0	0	0	0	0	0	0	0	0	0	0	0	0	0	0	FALSE
7809	BSND	0	0	0	0	0	0	0	0	0	0	0	0	0	0	0	0	0	0	FALSE
54836	BSPRY	0	0	0	0	0	0	0	0	0	0	0	0	0	0	0	0	0	0	FALSE
683	BST1	0	0	0	0	0	0	0	0	0	0	0	0	0	0	0	0	0	0	FALSE
684	BST2	0	0	0	0	0	0	0	0	0	0	0	0	0	0	0	0	0	0	FALSE
9044	BTAF1	0	0	0	0	0	0	0	0	0	0	0	0	0	0	0	0	0	0	FALSE
53339	BTBD1	0	0	0	0	0	0	0	0	0	0	0	0	0	0	0	0	0	0	FALSE
84280	BTBD10	0	0	0	0	0	0	0	0	0	0	0	0	0	0	0	0	0	0	FALSE
121551	BTBD11	0	0	0	0	0	0	0	0	0	0	0	0	0	0	0	0	0	0	FALSE
118663	BTBD16	0	0	0	0	0	0	0	0	0	0	0	0	0	0	0	0	0	0	FALSE
388419	BTBD17	0	0	0	0	0	0	0	0	0	0	0	0	0	0	0	0	0	0	FALSE
643376	BTBD18	0	0	0	0	0	0	0	0	0	0	0	0	0	0	0	0	0	0	FALSE
55643	BTBD2	0	0	0	0	0	0	0	0	0	0	0	0	0	0	0	0	0	0	FALSE
22903	BTBD3	0	0	0	0	0	0	0	0	0	0	0	0	0	0	0	0	0	0	FALSE
90135	BTBD6	0	0	0	0	0	0	0	0	0	0	0	0	0	0	0	0	0	0	FALSE
55727	BTBD7	0	0	0	0	0	0	0	0	0	0	0	0	0	0	0	0	0	0	FALSE
284697	BTBD8	0	0	0	0	0	0	0	0	0	0	0	0	0	0	0	0	0	0	FALSE
114781	BTBD9	0	0	0	0	0	0	0	0	0	0	0	0	0	0	0	0	0	0	FALSE
685	BTC	0	0	0	0	0	0	0	0	0	0	0	0	0	0	0	0	0	0	FALSE
686	BTD	0	0	0	0	0	0	0	0	0	0	0	0	0	0	0	0	0	0	FALSE
689	BTF3	0	1	1	1	1	1	1	0	1	1	0	1	0	1	1	0	0	11	FALSE
91408	BTF3L4	0	0	0	0	0	0	0	0	0	0	0	0	0	0	0	0	0	0	FALSE
694	BTG1	0	0	0	0	0	0	0	0	0	0	0	0	0	0	0	0	0	0	FALSE
7832	BTG2	0	0	0	0	0	0	0	0	0	0	0	0	0	0	0	0	0	0	FALSE
10950	BTG3	0	0	0	0	0	0	0	0	0	0	0	0	0	0	0	0	0	0	FALSE
54766	BTG4	0	0	0	0	0	0	0	0	0	0	0	0	0	0	0	0	0	0	FALSE
695	BTK	0	0	0	0	0	0	0	0	0	0	0	0	0	0	0	0	0	0	FALSE
151888	BTLA	0	0	0	0	0	0	0	0	0	0	0	0	0	0	0	0	0	0	FALSE
696	BTN1A1	0	0	0	0	0	0	0	0	0	0	0	0	0	0	0	0	0	0	FALSE
11120	BTN2A1	0	0	0	0	0	0	0	0	0	0	0	0	0	0	0	0	0	0	FALSE
10385	BTN2A2	0	0	0	0	0	0	0	0	0	0	0	0	0	0	0	0	0	0	FALSE
11119	BTN3A1	0	0	0	0	0	0	0	0	0	0	0	0	0	0	0	0	0	0	FALSE
11118	BTN3A2	0	0	0	0	0	0	0	0	0	0	0	0	0	0	0	0	0	0	FALSE
10384	BTN3A3	0	0	0	0	0	0	0	0	0	0	0	0	0	0	0	0	0	0	FALSE
10917	BTNL3	0	0	0	0	0	0	0	0	0	0	0	0	0	0	0	0	0	0	FALSE
79908	BTNL8	0	0	0	0	0	0	0	0	0	0	0	0	0	0	0	0	0	0	FALSE
153579	BTNL9	0	0	0	0	0	0	0	0	0	0	0	0	0	0	0	0	0	0	FALSE
8945	BTRC	0	0	0	0	0	0	0	0	0	0	0	0	0	0	0	0	0	0	FALSE
699	BUB1	0	0	0	0	0	0	0	0	0	1	0	0	0	0	0	0	0	1	FALSE
701	BUB1B	1	1	1	1	1	1	1	1	1	1	1	1	1	1	1	1	1	17	TRUE
9184	BUB3	1	1	1	1	1	1	1	1	1	1	1	1	1	1	1	1	1	17	TRUE
84811	BUD13	0	0	0	0	0	0	0	0	0	0	0	0	0	0	0	0	0	0	FALSE
114049	BUD23	0	1	1	0	0	0	0	1	0	1	0	1	0	1	0	0	0	6	FALSE
8896	BUD31	1	1	1	1	1	1	1	1	1	1	1	1	1	1	1	1	1	17	TRUE
11149	BVES	0	0	0	0	0	0	0	0	0	0	0	0	0	0	0	0	0	0	FALSE
705	BYSL	0	0	1	1	0	0	0	1	1	1	1	1	1	0	0	1	1	10	FALSE
9689	BZW1	0	0	0	0	0	0	0	0	0	0	0	0	0	0	0	0	0	0	FALSE
28969	BZW2	0	0	0	0	0	0	0	0	0	0	0	0	0	0	0	0	0	0	FALSE
387638	C10orf113	0	0	0	0	0	0	0	0	0	0	0	0	0	0	0	0	0	0	FALSE
399814	C10orf120	0	0	0	0	0	0	0	0	0	0	0	0	0	0	0	0	0	0	FALSE
282966	C10orf53	0	0	0	0	0	0	0	0	0	0	0	0	0	0	0	0	0	0	FALSE
118461	C10orf71	0	0	0	0	0	0	0	0	0	0	0	0	0	0	0	0	0	0	FALSE
387695	C10orf99	0	0	0	0	0	0	0	0	0	0	0	0	0	0	0	0	0	0	FALSE
56673	C11orf16	0	0	0	0	0	0	0	0	0	0	0	0	0	0	0	0	0	0	FALSE
53838	C11orf24	0	0	0	0	0	0	0	0	0	0	0	0	0	0	0	0	0	0	FALSE
143501	C11orf40	0	0	0	0	0	0	0	0	0	0	0	0	0	0	0	0	0	0	FALSE
160298	C11orf42	0	0	0	0	0	0	0	0	0	0	0	0	0	0	0	0	0	0	FALSE
219833	C11orf45	0	0	0	0	0	0	0	0	0	0	0	0	0	0	0	0	0	0	FALSE
79096	C11orf49	0	0	0	0	0	0	0	0	0	0	0	0	0	0	0	0	0	0	FALSE
10944	C11orf58	0	0	0	0	0	0	0	0	0	0	0	0	0	0	0	0	0	0	FALSE
54494	C11orf71	0	0	0	0	0	0	0	0	0	0	0	0	0	0	0	0	0	0	FALSE
119710	C11orf74	0	0	0	0	0	0	0	0	0	0	0	0	0	0	0	0	0	0	FALSE
79703	C11orf80	0	0	0	0	0	0	0	0	0	0	0	0	0	0	0	0	0	0	FALSE
60314	C12orf10	0	0	0	0	0	0	0	0	0	0	0	0	0	0	0	0	0	0	FALSE
57102	C12orf4	0	0	0	0	0	0	0	0	0	0	0	0	0	0	0	0	0	0	FALSE
283461	C12orf40	0	0	0	0	0	0	0	0	0	0	0	0	0	0	0	0	0	0	FALSE
64897	C12orf43	0	0	0	0	0	0	0	0	0	0	0	0	0	0	0	0	0	0	FALSE
121053	C12orf45	0	0	0	0	0	0	0	0	0	0	0	0	0	0	0	0	0	0	FALSE
79794	C12orf49	0	0	0	0	0	0	0	0	0	0	0	0	0	0	0	0	0	0	FALSE
121273	C12orf54	0	0	0	0	0	0	0	0	0	0	0	0	0	0	0	0	0	0	FALSE
144608	C12orf60	0	0	0	0	0	0	0	0	0	0	0	0	0	0	0	0	0	0	FALSE
144577	C12orf66	0	0	0	0	0	0	0	0	0	0	0	0	0	0	0	0	0	0	FALSE
55017	C14orf119	0	0	0	0	0	0	0	0	0	0	0	0	0	0	0	0	0	0	FALSE
122525	C14orf28	0	0	0	0	0	0	0	0	0	0	0	0	0	0	0	0	0	0	FALSE
317761	C14orf39	0	0	0	0	0	0	0	0	0	0	0	0	0	0	0	0	0	0	FALSE
60686	C14orf93	0	0	0	0	0	0	0	0	0	0	0	0	0	0	0	0	0	0	FALSE
56905	C15orf39	0	0	0	0	0	0	0	0	0	0	0	0	0	0	0	0	0	0	FALSE
84419	C15orf48	0	0	0	0	0	0	0	0	0	0	0	0	0	0	0	0	0	0	FALSE
145853	C15orf61	0	0	0	0	0	0	0	0	0	0	0	0	0	0	0	0	0	0	FALSE
145788	C15orf65	0	0	0	0	0	0	0	0	0	0	0	0	0	0	0	0	0	0	FALSE
89927	BMERB1	0	0	0	0	0	0	0	0	0	0	0	0	0	0	0	0	0	0	FALSE
123775	C16orf46	0	0	0	0	0	0	0	0	0	0	0	0	0	0	0	0	0	0	FALSE
64755	C16orf58	0	0	0	0	0	0	0	0	0	0	0	0	0	0	0	0	0	0	FALSE
146562	C16orf71	0	0	0	0	0	0	0	0	0	0	0	0	0	0	0	0	0	0	FALSE
123970	C16orf78	0	0	0	0	0	0	0	0	0	0	0	0	0	0	0	0	0	0	FALSE
388272	C16orf87	0	0	0	0	0	0	0	0	0	0	0	0	0	0	0	0	0	0	FALSE
146556	C16orf89	0	0	0	0	0	0	0	0	0	0	0	0	0	0	0	0	0	0	FALSE
339263	LINC02693	0	0	0	0	0	0	0	0	0	0	0	0	0	0	0	0	0	0	FALSE
284018	C17orf58	0	0	0	0	0	0	0	0	0	0	0	0	0	0	0	0	0	0	FALSE
124773	C17orf64	0	0	0	0	0	0	0	0	0	0	0	0	0	0	0	0	0	0	FALSE
64149	C17orf75	0	0	0	0	0	0	0	0	0	0	0	0	0	0	0	0	0	0	FALSE
284099	C17orf78	0	0	0	0	0	0	0	0	0	0	0	0	0	0	0	0	0	0	FALSE
55028	C17orf80	0	0	0	0	0	0	0	0	0	0	0	0	0	0	0	0	0	0	FALSE
100141515	C17orf99	0	0	0	0	0	0	0	0	0	0	0	0	0	0	0	0	0	0	FALSE
147339	C18orf25	0	0	0	0	0	0	0	0	0	0	0	0	0	0	0	0	0	0	FALSE
83636	C19orf12	0	0	0	0	0	0	0	0	0	0	0	0	0	0	0	0	0	0	FALSE
147685	C19orf18	0	0	0	0	0	0	0	0	0	0	0	0	0	0	0	0	0	0	FALSE
28974	C19orf53	0	0	0	0	0	0	0	0	0	0	0	0	0	0	0	0	0	0	FALSE
10438	C1D	0	0	0	0	0	0	0	0	0	0	0	0	0	0	0	0	0	0	FALSE
56913	C1GALT1	0	0	0	0	0	0	0	0	0	0	0	0	0	0	0	0	0	0	FALSE
29071	C1GALT1C1	0	0	0	0	0	0	0	0	0	0	0	0	0	0	0	0	0	0	FALSE
712	C1QA	0	0	0	0	0	0	0	0	0	0	0	0	0	0	0	0	0	0	FALSE
713	C1QB	0	0	0	0	0	0	0	0	0	0	0	0	0	0	0	0	0	0	FALSE
708	C1QBP	0	0	0	0	0	0	0	0	0	0	0	0	0	0	0	0	0	0	FALSE
714	C1QC	0	0	0	0	0	0	0	0	0	0	0	0	0	0	0	0	0	0	FALSE
10882	C1QL1	0	0	0	0	0	0	0	0	0	0	0	0	0	0	0	0	0	0	FALSE
165257	C1QL2	0	0	0	0	0	0	0	0	0	0	0	0	0	0	0	0	0	0	FALSE
389941	C1QL3	0	0	0	0	0	0	0	0	0	0	0	0	0	0	0	0	0	0	FALSE
338761	C1QL4	0	0	0	0	0	0	0	0	0	0	0	0	0	0	0	0	0	0	FALSE
114897	C1QTNF1	0	0	0	0	0	0	0	0	0	0	0	0	0	0	0	0	0	0	FALSE
388581	C1QTNF12	0	0	0	0	0	0	0	0	0	0	0	0	0	0	0	0	0	0	FALSE
114898	C1QTNF2	0	0	0	0	0	0	0	0	0	0	0	0	0	0	0	0	0	0	FALSE
114899	C1QTNF3	0	0	0	0	0	0	0	0	0	0	0	0	0	0	0	0	0	0	FALSE
114904	C1QTNF6	0	0	0	0	0	0	0	0	0	0	0	0	0	0	0	0	0	0	FALSE
114905	C1QTNF7	0	0	0	0	0	0	0	0	0	0	0	0	0	0	0	0	0	0	FALSE
390664	C1QTNF8	0	0	0	0	0	0	0	0	0	0	0	0	0	0	0	0	0	0	FALSE
338872	C1QTNF9	0	0	0	0	0	0	0	0	0	0	0	0	0	0	0	0	0	0	FALSE
387911	C1QTNF9B	0	0	0	0	0	0	0	0	0	0	0	0	0	0	0	0	0	0	FALSE
51279	C1RL	0	0	0	0	0	0	0	0	0	0	0	0	0	0	0	0	0	0	FALSE
716	C1S	0	0	0	0	0	0	0	0	0	0	0	0	0	0	0	0	0	0	FALSE
200159	C1orf100	0	0	0	0	0	0	0	0	0	0	0	0	0	0	0	0	0	0	FALSE
92346	C1orf105	0	0	0	0	0	0	0	0	0	0	0	0	0	0	0	0	0	0	FALSE
54955	C1orf109	0	1	1	1	1	0	1	1	1	1	0	1	1	1	1	1	0	13	FALSE
79762	C1orf115	0	0	0	0	0	0	0	0	0	0	0	0	0	0	0	0	0	0	FALSE
79098	C1orf116	0	0	0	0	0	0	0	0	0	0	0	0	0	0	0	0	0	0	FALSE
127687	C1orf122	0	0	0	0	0	0	0	0	0	0	0	0	0	0	0	0	0	0	FALSE
54987	CZIB	0	0	0	0	0	0	0	0	0	0	0	0	0	0	0	0	0	0	FALSE
128061	C1orf131	0	0	0	0	0	0	0	0	0	0	0	0	0	0	0	0	0	0	FALSE
400757	C1orf141	0	0	0	0	0	0	0	0	0	0	0	0	0	0	0	0	0	0	FALSE
388649	C1orf146	0	0	0	0	0	0	0	0	0	0	0	0	0	0	0	0	0	0	FALSE
93190	C1orf158	0	0	0	0	0	0	0	0	0	0	0	0	0	0	0	0	0	0	FALSE
54991	C1orf159	0	0	0	0	0	0	0	0	0	0	0	0	0	0	0	0	0	0	FALSE
128346	C1orf162	0	0	0	0	0	0	0	0	0	0	0	0	0	0	0	0	0	0	FALSE
339448	C1orf174	0	0	0	0	0	0	0	0	0	0	0	0	0	0	0	0	0	0	FALSE
84886	C1orf198	0	0	0	0	0	0	0	0	0	0	0	0	0	0	0	0	0	0	FALSE
81563	C1orf21	0	0	0	0	0	0	0	0	0	0	0	0	0	0	0	0	0	0	FALSE
79169	C1orf35	0	0	0	0	0	0	0	0	0	0	0	0	0	0	0	0	0	0	FALSE
25912	C1orf43	0	0	0	0	0	0	0	0	0	0	0	0	0	0	0	0	0	0	FALSE
388722	C1orf53	0	0	0	0	0	0	0	0	0	0	0	0	0	0	0	0	0	0	FALSE
79630	C1orf54	0	0	0	0	0	0	0	0	0	0	0	0	0	0	0	0	0	0	FALSE
54964	C1orf56	0	0	0	0	0	0	0	0	0	0	0	0	0	0	0	0	0	0	FALSE
148304	C1orf74	0	0	0	0	0	0	0	0	0	0	0	0	0	0	0	0	0	0	FALSE
127795	C1orf87	0	0	0	0	0	0	0	0	0	0	0	0	0	0	0	0	0	0	FALSE
717	C2	0	0	0	0	0	0	0	0	0	0	0	0	0	0	0	0	0	0	FALSE
140873	C20orf173	0	0	0	0	0	0	0	0	0	0	0	0	0	0	0	0	0	0	FALSE
400831	C20orf202	0	0	0	0	0	0	0	0	0	0	0	0	0	0	0	0	0	0	FALSE
128602	C20orf85	0	0	0	0	0	0	0	0	0	0	0	0	0	0	0	0	0	0	FALSE
54058	C21orf58	0	0	0	0	0	0	0	0	0	0	0	0	0	0	0	0	0	0	FALSE
56245	C21orf62	0	0	0	0	0	0	0	0	0	0	0	0	0	0	0	0	0	0	FALSE
54149	C21orf91	0	0	0	0	0	0	0	0	0	0	0	0	0	0	0	0	0	0	FALSE
84645	C22orf23	0	0	0	0	0	0	0	0	0	0	0	0	0	0	0	0	0	0	FALSE
25770	C22orf31	0	0	0	0	0	0	0	0	0	0	0	0	0	0	0	0	0	0	FALSE
79640	C22orf46	0	0	0	0	0	0	0	0	0	0	0	0	0	0	0	0	0	0	FALSE
25966	C2CD2	0	0	0	0	0	0	0	0	0	0	0	0	0	0	0	0	0	0	FALSE
9854	C2CD2L	0	0	0	0	0	0	0	0	0	0	0	0	0	0	0	0	0	0	FALSE
9847	C2CD5	0	0	0	0	0	0	0	0	0	0	0	0	0	0	0	0	0	0	FALSE
151254	C2CD6	0	0	0	0	0	0	0	0	0	0	0	0	0	0	0	0	0	0	FALSE
150590	C2orf15	0	0	0	0	0	0	0	0	0	0	0	0	0	0	0	0	0	0	FALSE
84226	C2orf16	0	0	0	0	0	0	0	0	0	0	0	0	0	0	0	0	0	0	FALSE
84417	ECRG4	0	0	0	0	0	0	0	0	0	0	0	0	0	0	0	0	0	0	FALSE
79074	C2orf49	0	0	0	0	0	0	0	0	0	0	0	0	0	0	0	0	0	0	FALSE
130813	C2orf50	0	0	0	0	0	0	0	0	0	0	0	0	0	0	0	0	0	0	FALSE
401027	C2orf66	0	0	0	0	0	0	0	0	0	0	0	0	0	0	0	0	0	0	FALSE
205327	C2orf69	0	0	0	0	0	0	0	0	0	0	0	0	0	0	0	0	0	0	FALSE
129852	C2orf73	0	0	0	0	0	0	0	0	0	0	0	0	0	0	0	0	0	0	FALSE
130355	C2orf76	0	0	0	0	0	0	0	0	0	0	0	0	0	0	0	0	0	0	FALSE
718	C3	0	0	0	0	0	0	0	0	0	0	0	0	0	0	0	0	0	0	FALSE
719	C3AR1	0	0	0	0	0	0	0	0	0	0	0	0	0	0	0	0	0	0	FALSE
152405	TEX55	0	0	0	0	0	0	0	0	0	0	0	0	0	0	0	0	0	0	FALSE
285315	C3orf33	0	0	0	0	0	0	0	0	0	0	0	0	0	0	0	0	0	0	FALSE
285237	C3orf38	0	0	0	0	0	0	0	0	0	0	0	0	0	0	0	0	0	0	FALSE
79669	C3orf52	0	0	0	0	0	0	0	0	0	0	0	0	0	0	0	0	0	0	FALSE
205428	DIPK2A	0	0	0	0	0	0	0	0	0	0	0	0	0	0	0	0	0	0	FALSE
200844	C3orf67	0	0	0	0	0	0	0	0	0	0	0	0	0	0	0	0	0	0	FALSE
401097	C3orf80	0	0	0	0	0	0	0	0	0	0	0	0	0	0	0	0	0	0	FALSE
722	C4BPA	0	0	0	0	0	0	0	0	0	0	0	0	0	0	0	0	0	0	FALSE
725	C4BPB	0	0	0	0	0	0	0	0	0	0	0	0	0	0	0	0	0	0	FALSE
132321	C4orf33	0	0	0	0	0	0	0	0	0	0	0	0	0	0	0	0	0	0	FALSE
132989	C4orf36	0	0	0	0	0	0	0	0	0	0	0	0	0	0	0	0	0	0	FALSE
152940	C4orf45	0	0	0	0	0	0	0	0	0	0	0	0	0	0	0	0	0	0	FALSE
401115	C4orf48	0	0	0	0	0	0	0	0	0	0	0	0	0	0	0	0	0	0	FALSE
727	C5	0	0	0	0	0	0	0	0	0	0	0	0	0	0	0	0	0	0	FALSE
728	C5AR1	0	0	0	0	0	0	0	0	0	0	0	0	0	0	0	0	0	0	FALSE
27202	C5AR2	0	0	0	0	0	0	0	0	0	0	0	0	0	0	0	0	0	0	FALSE
56951	C5orf15	0	0	0	0	0	0	0	0	0	0	0	0	0	0	0	0	0	0	FALSE
55322	C5orf22	0	0	0	0	0	0	0	0	0	0	0	0	0	0	0	0	0	0	FALSE
134553	C5orf24	0	0	0	0	0	0	0	0	0	0	0	0	0	0	0	0	0	0	FALSE
375444	C5orf34	0	0	0	0	0	0	0	0	0	0	0	0	0	0	0	0	0	0	FALSE
389336	C5orf46	0	0	0	0	0	0	0	0	0	0	0	0	0	0	0	0	0	0	FALSE
133491	C5orf47	0	0	0	0	0	0	0	0	0	0	0	0	0	0	0	0	0	0	FALSE
285636	C5orf51	0	0	0	0	0	0	0	0	0	0	0	0	0	0	0	0	0	0	FALSE
100190949	C5orf52	0	0	0	0	0	0	0	0	0	0	0	0	0	0	0	0	0	0	FALSE
729	C6	0	0	0	0	0	0	0	0	0	0	0	0	0	0	0	0	0	0	FALSE
10665	TSBP1	0	0	0	0	0	0	0	0	0	0	0	0	0	0	0	0	0	0	FALSE
64771	ILRUN	0	0	0	0	0	0	0	0	0	0	0	0	0	0	0	0	0	0	FALSE
168090	C6orf118	0	0	0	0	0	0	0	0	0	0	0	0	0	0	0	0	0	0	FALSE
221545	C6orf136	0	0	0	0	0	0	0	0	0	0	0	0	0	0	0	0	0	0	FALSE
29113	C6orf15	0	0	0	0	0	0	0	0	0	0	0	0	0	0	0	0	0	0	FALSE
206412	C6orf163	0	0	0	0	0	0	0	0	0	0	0	0	0	0	0	0	0	0	FALSE
404220	C6orf201	0	0	0	0	0	0	0	0	0	0	0	0	0	0	0	0	0	0	FALSE
221416	C6orf223	0	0	0	0	0	0	0	0	0	0	0	0	0	0	0	0	0	0	FALSE
50854	SNHG32	0	0	0	0	0	0	0	0	0	0	0	0	0	0	0	0	0	0	FALSE
347744	C6orf52	0	0	0	0	0	0	0	0	0	0	0	0	0	0	0	0	0	0	FALSE
352999	C6orf58	0	0	0	0	0	0	0	0	0	0	0	0	0	0	0	0	0	0	FALSE
81688	C6orf62	0	0	0	0	0	0	0	0	0	0	0	0	0	0	0	0	0	0	FALSE
221477	C6orf89	0	0	0	0	0	0	0	0	0	0	0	0	0	0	0	0	0	0	FALSE
730	C7	0	0	0	0	0	0	0	0	0	0	0	0	0	0	0	0	0	0	FALSE
136895	C7orf31	0	0	0	0	0	0	0	0	0	0	0	0	0	0	0	0	0	0	FALSE
55262	MAP11	0	0	0	0	0	0	0	0	0	0	0	0	0	0	0	0	0	0	FALSE
136288	C7orf57	0	0	0	0	0	0	0	0	0	0	0	0	0	0	0	0	0	0	FALSE
731	C8A	0	0	0	0	0	0	0	0	0	0	0	0	0	0	0	0	0	0	FALSE
732	C8B	0	0	0	0	0	0	0	0	0	0	0	0	0	0	0	0	0	0	FALSE
733	C8G	0	0	0	0	0	0	0	0	0	0	0	0	0	0	0	0	0	0	FALSE
65265	C8orf33	0	0	0	0	0	0	0	0	0	0	0	0	0	0	0	0	0	0	FALSE
116328	C8orf34	0	0	0	0	0	0	0	0	0	0	0	0	0	0	0	0	0	0	FALSE
157657	C8orf37	0	0	0	0	0	0	0	0	0	0	0	0	0	0	0	0	0	0	FALSE
56260	C8orf44	0	0	0	0	0	0	0	0	0	0	0	0	0	0	0	0	0	0	FALSE
157773	C8orf48	0	0	0	0	0	0	0	0	0	0	0	0	0	0	0	0	0	0	FALSE
414919	C8orf82	0	0	0	0	0	0	0	0	0	0	0	0	0	0	0	0	0	0	FALSE
389649	C8orf86	0	0	0	0	0	0	0	0	0	0	0	0	0	0	0	0	0	0	FALSE
735	C9	0	0	0	0	0	0	0	0	0	0	0	0	0	0	0	0	0	0	FALSE
138724	C9orf131	0	0	0	0	0	0	0	0	0	0	0	0	0	0	0	0	0	0	FALSE
138255	C9orf135	0	0	0	0	0	0	0	0	0	0	0	0	0	0	0	0	0	0	FALSE
401546	C9orf152	0	0	0	0	0	0	0	0	0	0	0	0	0	0	0	0	0	0	FALSE
84688	C9orf24	0	0	0	0	0	0	0	0	0	0	0	0	0	0	0	0	0	0	FALSE
84909	AOPEP	0	0	0	0	0	0	0	0	0	0	0	0	0	0	0	0	0	0	FALSE
55071	C9orf40	0	0	0	0	0	0	0	0	0	0	0	0	0	0	0	0	0	0	FALSE
257169	C9orf43	0	0	0	0	0	0	0	0	0	0	0	0	0	0	0	0	0	0	FALSE
157983	DOCK8-AS1	0	0	0	0	0	0	0	0	0	0	0	0	0	0	0	0	0	0	FALSE
203228	C9orf72	0	0	0	0	0	0	0	0	0	0	0	0	0	0	0	0	0	0	FALSE
138241	C9orf85	0	0	0	0	0	0	0	0	0	0	0	0	0	0	0	0	0	0	FALSE
759	CA1	0	0	0	0	0	0	0	0	0	0	0	0	0	0	0	0	0	0	FALSE
56934	CA10	0	0	0	0	0	0	0	0	0	0	0	0	0	0	0	0	0	0	FALSE
770	CA11	0	0	0	0	0	0	0	0	0	0	0	0	0	0	0	0	0	0	FALSE
771	CA12	0	0	0	0	0	0	0	0	0	0	0	0	0	0	0	0	0	0	FALSE
377677	CA13	0	0	0	0	0	0	0	0	0	0	0	0	0	0	0	0	0	0	FALSE
23632	CA14	0	0	0	0	0	0	0	0	0	0	0	0	0	0	0	0	0	0	FALSE
760	CA2	0	0	0	0	0	0	0	0	0	0	0	0	0	0	0	0	0	0	FALSE
761	CA3	0	0	0	0	0	0	0	0	0	0	0	0	0	0	0	0	0	0	FALSE
762	CA4	0	0	0	0	0	0	0	0	0	0	0	0	0	0	0	0	0	0	FALSE
763	CA5A	0	0	0	0	0	0	0	0	0	0	0	0	0	0	0	0	0	0	FALSE
11238	CA5B	0	0	0	0	0	0	0	0	0	0	0	0	0	0	0	0	0	0	FALSE
765	CA6	0	0	0	0	0	0	0	0	0	0	0	0	0	0	0	0	0	0	FALSE
766	CA7	0	0	0	0	0	0	0	0	0	0	0	0	0	0	0	0	0	0	FALSE
767	CA8	0	0	0	0	0	0	0	0	0	0	0	0	0	0	0	0	0	0	FALSE
768	CA9	0	0	0	0	0	0	0	0	0	0	0	0	0	0	0	0	0	0	FALSE
51719	CAB39	0	0	0	0	0	0	0	0	0	0	0	0	0	0	0	0	0	0	FALSE
81617	CAB39L	0	0	0	0	0	0	0	0	0	0	0	0	0	0	0	0	0	0	FALSE
23523	CABIN1	0	0	0	0	0	0	0	0	0	0	0	0	0	0	0	0	0	0	FALSE
81928	CABLES2	0	0	0	0	0	0	0	0	0	0	0	0	0	0	0	0	0	0	FALSE
9478	CABP1	0	0	0	0	0	0	0	0	0	0	0	0	0	0	0	0	0	0	FALSE
51475	CABP2	0	0	0	0	0	0	0	0	0	0	0	0	0	0	0	0	0	0	FALSE
57010	CABP4	0	0	0	0	0	0	0	0	0	0	0	0	0	0	0	0	0	0	FALSE
56344	CABP5	0	0	0	0	0	0	0	0	0	0	0	0	0	0	0	0	0	0	FALSE
164633	CABP7	0	0	0	0	0	0	0	0	0	0	0	0	0	0	0	0	0	0	FALSE
85438	CABS1	0	0	0	0	0	0	0	0	0	0	0	0	0	0	0	0	0	0	FALSE
26256	CABYR	0	0	0	0	0	0	0	0	0	0	0	0	0	0	0	0	0	0	FALSE
11094	CACFD1	0	0	0	0	0	0	0	0	0	0	0	0	0	0	0	0	0	0	FALSE
57685	CACHD1	0	0	0	0	0	0	0	0	0	0	0	0	0	0	0	0	0	0	FALSE
773	CACNA1A	0	0	0	0	0	0	0	0	0	0	0	0	0	0	0	0	0	0	FALSE
774	CACNA1B	0	0	0	0	0	0	0	0	0	0	0	0	0	0	0	0	0	0	FALSE
775	CACNA1C	0	0	0	0	0	0	0	0	0	0	0	0	0	0	0	0	0	0	FALSE
776	CACNA1D	0	0	0	0	0	0	0	0	0	0	0	0	0	0	0	0	0	0	FALSE
777	CACNA1E	0	0	0	0	0	0	0	0	0	0	0	0	0	0	0	0	0	0	FALSE
778	CACNA1F	0	0	0	0	0	0	0	0	0	0	0	0	0	0	0	0	0	0	FALSE
8913	CACNA1G	0	0	0	0	0	0	0	0	0	0	0	0	0	0	0	0	0	0	FALSE
8912	CACNA1H	0	0	0	0	0	0	0	0	0	0	0	0	0	0	0	0	0	0	FALSE
8911	CACNA1I	0	0	0	0	0	0	0	0	0	0	0	0	0	0	0	0	0	0	FALSE
779	CACNA1S	0	0	0	0	0	0	0	0	0	0	0	0	0	0	0	0	0	0	FALSE
781	CACNA2D1	0	0	0	0	0	0	0	0	0	0	0	0	0	0	0	0	0	0	FALSE
9254	CACNA2D2	0	0	0	0	0	0	0	0	0	0	0	0	0	0	0	0	0	0	FALSE
55799	CACNA2D3	0	0	0	0	0	0	0	0	0	0	0	0	0	0	0	0	0	0	FALSE
93589	CACNA2D4	0	0	0	0	0	0	0	0	0	0	0	0	0	0	0	0	0	0	FALSE
782	CACNB1	0	0	0	0	0	0	0	0	0	0	0	0	0	0	0	0	0	0	FALSE
783	CACNB2	0	0	0	0	0	0	0	0	0	0	0	0	0	0	0	0	0	0	FALSE
784	CACNB3	0	0	0	0	0	0	0	0	0	0	0	0	0	0	0	0	0	0	FALSE
785	CACNB4	0	0	0	0	0	0	0	0	0	0	0	0	0	0	0	0	0	0	FALSE
786	CACNG1	0	0	0	0	0	0	0	0	0	0	0	0	0	0	0	0	0	0	FALSE
10369	CACNG2	0	0	0	0	0	0	0	0	0	0	0	0	0	0	0	0	0	0	FALSE
10368	CACNG3	0	0	0	0	0	0	0	0	0	0	0	0	0	0	0	0	0	0	FALSE
27092	CACNG4	0	0	0	0	0	0	0	0	0	0	0	0	0	0	0	0	0	0	FALSE
27091	CACNG5	0	0	0	0	0	0	0	0	0	0	0	0	0	0	0	0	0	0	FALSE
59285	CACNG6	0	0	0	0	0	0	0	0	0	0	0	0	0	0	0	0	0	0	FALSE
59284	CACNG7	0	0	0	0	0	0	0	0	0	0	0	0	0	0	0	0	0	0	FALSE
59283	CACNG8	0	0	0	0	0	0	0	0	0	0	0	0	0	0	0	0	0	0	FALSE
143384	CACUL1	0	0	0	0	0	0	0	0	0	0	0	0	0	0	0	0	0	0	FALSE
27101	CACYBP	0	0	0	0	0	0	0	0	0	0	0	0	0	0	0	0	0	0	FALSE
790	CAD	0	1	0	0	0	0	0	0	0	1	0	0	0	0	0	0	0	2	FALSE
23705	CADM1	0	0	0	0	0	0	0	0	0	0	0	0	0	0	0	0	0	0	FALSE
253559	CADM2	0	0	0	0	0	0	0	0	0	0	0	0	0	0	0	0	0	0	FALSE
57863	CADM3	0	0	0	0	0	0	0	0	0	0	0	0	0	0	0	0	0	0	FALSE
199731	CADM4	0	0	0	0	0	0	0	0	0	0	0	0	0	0	0	0	0	0	FALSE
8618	CADPS	0	0	0	0	0	0	0	0	0	0	0	0	0	0	0	0	0	0	FALSE
93664	CADPS2	0	0	0	0	0	0	0	0	0	0	0	0	0	0	0	0	0	0	FALSE
285782	CAGE1	0	0	0	0	0	0	0	0	0	0	0	0	0	0	0	0	0	0	FALSE
793	CALB1	0	0	0	0	0	0	0	0	0	0	0	0	0	0	0	0	0	0	FALSE
794	CALB2	0	0	0	0	0	0	0	0	0	0	0	0	0	0	0	0	0	0	FALSE
796	CALCA	0	0	0	0	0	0	0	0	0	0	0	0	0	0	0	0	0	0	FALSE
797	CALCB	0	0	0	0	0	0	0	0	0	0	0	0	0	0	0	0	0	0	FALSE
10241	CALCOCO2	0	0	0	0	0	0	0	0	0	0	0	0	0	0	0	0	0	0	FALSE
799	CALCR	0	0	0	0	0	0	0	0	0	0	0	0	0	0	0	0	0	0	FALSE
10203	CALCRL	0	0	0	0	0	0	0	0	0	0	0	0	0	0	0	0	0	0	FALSE
800	CALD1	0	0	0	0	0	0	0	0	0	0	0	0	0	0	0	0	0	0	FALSE
255022	CALHM1	0	0	0	0	0	0	0	0	0	0	0	0	0	0	0	0	0	0	FALSE
119395	CALHM3	0	0	0	0	0	0	0	0	0	0	0	0	0	0	0	0	0	0	FALSE
221301	CALHM4	0	0	0	0	0	0	0	0	0	0	0	0	0	0	0	0	0	0	FALSE
254228	CALHM5	0	0	0	0	0	0	0	0	0	0	0	0	0	0	0	0	0	0	FALSE
801	CALM1	0	0	0	0	0	0	0	0	0	0	0	0	0	0	0	0	0	0	FALSE
805	CALM2	0	0	0	0	0	0	0	0	0	0	0	0	0	0	0	0	0	0	FALSE
808	CALM3	0	0	0	0	0	0	0	0	0	0	0	0	0	0	0	0	0	0	FALSE
91860	CALML4	0	0	0	0	0	0	0	0	0	0	0	0	0	0	0	0	0	0	FALSE
51806	CALML5	0	0	0	0	0	0	0	0	0	0	0	0	0	0	0	0	0	0	FALSE
163688	CALML6	0	0	0	0	0	0	0	0	0	0	0	0	0	0	0	0	0	0	FALSE
83698	CALN1	0	0	0	0	0	0	0	0	0	0	0	0	0	0	0	0	0	0	FALSE
811	CALR	0	0	0	0	0	0	0	0	0	0	0	0	0	0	0	0	0	0	FALSE
125972	CALR3	0	0	0	0	0	0	0	0	0	0	0	0	0	0	0	0	0	0	FALSE
813	CALU	0	0	0	0	0	0	0	0	0	0	0	0	0	0	0	0	0	0	FALSE
50632	CALY	0	0	0	0	0	0	0	0	0	0	0	0	0	0	0	0	0	0	FALSE
8536	CAMK1	0	0	0	0	0	0	0	0	0	0	0	0	0	0	0	0	0	0	FALSE
57118	CAMK1D	0	0	0	0	0	0	0	0	0	0	0	0	0	0	0	0	0	0	FALSE
57172	CAMK1G	0	0	0	0	0	0	0	0	0	0	0	0	0	0	0	0	0	0	FALSE
815	CAMK2A	0	0	0	0	0	0	0	0	0	0	0	0	0	0	0	0	0	0	FALSE
816	CAMK2B	0	0	0	0	0	0	0	0	0	0	0	0	0	0	0	0	0	0	FALSE
817	CAMK2D	0	0	0	0	0	0	0	0	0	0	0	0	0	0	0	0	0	0	FALSE
818	CAMK2G	0	0	0	0	0	0	0	0	0	0	0	0	0	0	0	0	0	0	FALSE
55450	CAMK2N1	0	0	0	0	0	0	0	0	0	0	0	0	0	0	0	0	0	0	FALSE
814	CAMK4	0	0	0	0	0	0	0	0	0	0	0	0	0	0	0	0	0	0	FALSE
84254	CAMKK1	0	0	0	0	0	0	0	0	0	0	0	0	0	0	0	0	0	0	FALSE
10645	CAMKK2	0	0	0	0	0	0	0	0	0	0	0	0	0	0	0	0	0	0	FALSE
79823	CAMKMT	0	0	0	0	0	0	0	0	0	0	0	0	0	0	0	0	0	0	FALSE
79012	CAMKV	0	0	0	0	0	0	0	0	0	0	0	0	0	0	0	0	0	0	FALSE
819	CAMLG	0	0	0	0	0	0	0	0	0	0	0	0	0	0	0	0	0	0	FALSE
820	CAMP	0	0	0	0	0	0	0	0	0	0	0	0	0	0	0	0	0	0	FALSE
23261	CAMTA1	0	0	0	0	0	0	0	0	0	0	0	0	0	0	0	0	0	0	FALSE
23125	CAMTA2	0	0	0	0	0	0	0	0	0	0	0	0	0	0	0	0	0	0	FALSE
55832	CAND1	0	0	0	0	0	0	0	0	0	0	0	0	0	0	0	0	0	0	FALSE
23066	CAND2	0	0	0	0	0	0	0	0	0	0	0	0	0	0	0	0	0	0	FALSE
124583	CANT1	0	0	0	0	0	0	0	0	0	0	0	0	0	0	0	0	0	0	FALSE
821	CANX	0	0	0	0	0	0	0	0	0	0	0	0	0	0	0	0	0	0	FALSE
10487	CAP1	0	0	0	0	0	0	0	0	0	0	0	0	0	0	0	0	0	0	FALSE
10486	CAP2	0	0	0	0	0	0	0	0	0	0	0	0	0	0	0	0	0	0	FALSE
822	CAPG	0	0	0	0	0	0	0	0	0	0	0	0	0	0	0	0	0	0	FALSE
823	CAPN1	0	0	0	0	0	0	0	0	0	0	0	0	0	0	0	0	0	0	FALSE
11132	CAPN10	0	0	0	0	0	0	0	0	0	0	0	0	0	0	0	0	0	0	FALSE
11131	CAPN11	0	0	0	0	0	0	0	0	0	0	0	0	0	0	0	0	0	0	FALSE
147968	CAPN12	0	0	0	0	0	0	0	0	0	0	0	0	0	0	0	0	0	0	FALSE
92291	CAPN13	0	0	0	0	0	0	0	0	0	0	0	0	0	0	0	0	0	0	FALSE
6650	CAPN15	0	0	0	0	0	0	0	0	0	0	0	0	0	0	0	0	0	0	FALSE
824	CAPN2	0	0	0	0	0	0	0	0	0	0	0	0	0	0	0	0	0	0	FALSE
825	CAPN3	0	0	0	0	0	0	0	0	0	0	0	0	0	0	0	0	0	0	FALSE
726	CAPN5	0	0	0	0	0	0	0	0	0	0	0	0	0	0	0	0	0	0	FALSE
827	CAPN6	0	0	0	0	0	0	0	0	0	0	0	0	0	0	0	0	0	0	FALSE
23473	CAPN7	0	0	0	0	0	0	0	0	0	0	0	0	0	0	0	0	0	0	FALSE
10753	CAPN9	0	0	0	0	0	0	0	0	0	0	0	0	0	0	0	0	0	0	FALSE
826	CAPNS1	0	0	0	0	0	0	0	0	0	0	0	0	0	0	0	0	0	0	FALSE
84290	CAPNS2	0	0	0	0	0	0	0	0	0	0	0	0	0	0	0	0	0	0	FALSE
4076	CAPRIN1	0	0	0	0	0	0	0	0	0	0	0	0	0	0	0	0	0	0	FALSE
65981	CAPRIN2	0	0	0	0	0	0	0	0	0	0	0	0	0	0	0	0	0	0	FALSE
828	CAPS	0	0	0	0	0	0	0	0	0	0	0	0	0	0	0	0	0	0	FALSE
84698	CAPS2	0	0	0	0	0	0	0	0	0	0	0	0	0	0	0	0	0	0	FALSE
829	CAPZA1	0	0	0	0	0	0	0	0	0	0	0	0	0	0	0	0	0	0	FALSE
830	CAPZA2	0	0	0	0	0	0	0	0	0	0	0	0	0	0	0	0	0	0	FALSE
93661	CAPZA3	0	0	0	0	0	0	0	0	0	0	0	0	0	0	0	0	0	0	FALSE
832	CAPZB	0	1	1	1	1	1	1	1	1	1	1	1	1	1	1	1	1	16	TRUE
29775	CARD10	0	0	0	0	0	0	0	0	0	0	0	0	0	0	0	0	0	0	FALSE
84433	CARD11	0	0	0	0	0	0	0	0	0	0	0	0	0	0	0	0	0	0	FALSE
79092	CARD14	0	0	0	0	0	0	0	0	0	0	0	0	0	0	0	0	0	0	FALSE
114769	CARD16	0	0	0	0	0	0	0	0	0	0	0	0	0	0	0	0	0	0	FALSE
440068	CARD17	0	0	0	0	0	0	0	0	0	0	0	0	0	0	0	0	0	0	FALSE
59082	CARD18	0	0	0	0	0	0	0	0	0	0	0	0	0	0	0	0	0	0	FALSE
84674	CARD6	0	0	0	0	0	0	0	0	0	0	0	0	0	0	0	0	0	0	FALSE
22900	CARD8	0	0	0	0	0	0	0	0	0	0	0	0	0	0	0	0	0	0	FALSE
64170	CARD9	0	0	0	0	0	0	0	0	0	0	0	0	0	0	0	0	0	0	FALSE
79800	CARF	0	0	0	0	0	0	0	0	0	0	0	0	0	0	0	0	0	0	FALSE
23589	CARHSP1	0	0	0	0	0	0	0	0	0	0	0	0	0	0	0	0	0	0	FALSE
10498	CARM1	0	0	0	0	0	0	0	0	0	0	0	0	0	0	0	0	0	0	FALSE
55604	CARMIL1	0	0	0	0	0	0	0	0	0	0	0	0	0	0	0	0	0	0	FALSE
146206	CARMIL2	0	0	0	0	0	0	0	0	0	0	0	0	0	0	0	0	0	0	FALSE
833	CARS	1	1	1	1	1	1	1	1	1	1	1	1	1	1	1	1	0	16	TRUE
79587	CARS2	0	0	0	0	0	0	0	0	0	0	0	0	0	0	0	0	0	0	FALSE
9607	CARTPT	0	0	0	0	0	0	0	0	0	0	0	0	0	0	0	0	0	0	FALSE
55259	CASC1	0	0	0	0	0	0	0	0	0	0	0	0	0	0	0	0	0	0	FALSE
22794	CASC3	0	0	0	0	0	0	0	0	0	0	0	0	0	0	0	0	0	0	FALSE
113201	CASC4	0	0	0	0	0	0	0	0	0	0	0	0	0	0	0	0	0	0	FALSE
64921	CASD1	0	0	0	0	0	0	0	0	0	0	0	0	0	0	0	0	0	0	FALSE
8573	CASK	0	0	0	0	0	0	0	0	0	0	0	0	0	0	0	0	0	0	FALSE
57524	CASKIN1	0	0	0	0	0	0	0	0	0	0	0	0	0	0	0	0	0	0	FALSE
57513	CASKIN2	0	0	0	0	0	0	0	0	0	0	0	0	0	0	0	0	0	0	FALSE
834	CASP1	0	0	0	0	0	0	0	0	0	0	0	0	0	0	0	0	0	0	FALSE
843	CASP10	0	0	0	0	0	0	0	0	0	0	0	0	0	0	0	0	0	0	FALSE
23581	CASP14	0	0	0	0	0	0	0	0	0	0	0	0	0	0	0	0	0	0	FALSE
835	CASP2	0	0	0	0	0	0	0	0	0	0	0	0	0	0	0	0	0	0	FALSE
836	CASP3	0	0	0	0	0	0	0	0	0	0	0	0	0	0	0	0	0	0	FALSE
837	CASP4	0	0	0	0	0	0	0	0	0	0	0	0	0	0	0	0	0	0	FALSE
838	CASP5	0	0	0	0	0	0	0	0	0	0	0	0	0	0	0	0	0	0	FALSE
839	CASP6	0	0	0	0	0	0	0	0	0	0	0	0	0	0	0	0	0	0	FALSE
840	CASP7	0	0	0	0	0	0	0	0	0	0	0	0	0	0	0	0	0	0	FALSE
841	CASP8	0	0	0	0	0	0	0	0	0	0	0	0	0	0	0	0	0	0	FALSE
842	CASP9	0	0	0	0	0	0	0	0	0	0	0	0	0	0	0	0	0	0	FALSE
844	CASQ1	0	0	0	0	0	0	0	0	0	0	0	0	0	0	0	0	0	0	FALSE
845	CASQ2	0	0	0	0	0	0	0	0	0	0	0	0	0	0	0	0	0	0	FALSE
846	CASR	0	0	0	0	0	0	0	0	0	0	0	0	0	0	0	0	0	0	FALSE
831	CAST	0	0	0	0	0	0	0	0	0	0	0	0	0	0	0	0	0	0	FALSE
729438	CASTOR2	0	0	0	0	0	0	0	0	0	0	0	0	0	0	0	0	0	0	FALSE
352954	CASTOR3	0	0	0	0	0	0	0	0	0	0	0	0	0	0	0	0	0	0	FALSE
54897	CASZ1	0	0	0	0	0	0	0	0	0	0	0	0	0	0	0	0	0	0	FALSE
847	CAT	0	0	0	0	0	0	0	0	0	0	0	0	0	0	0	0	0	0	FALSE
117144	CATSPER1	0	0	0	0	0	0	0	0	0	0	0	0	0	0	0	0	0	0	FALSE
347732	CATSPER3	0	0	0	0	0	0	0	0	0	0	0	0	0	0	0	0	0	0	FALSE
378807	CATSPER4	0	0	0	0	0	0	0	0	0	0	0	0	0	0	0	0	0	0	FALSE
79820	CATSPERB	0	0	0	0	0	0	0	0	0	0	0	0	0	0	0	0	0	0	FALSE
257062	CATSPERD	0	0	0	0	0	0	0	0	0	0	0	0	0	0	0	0	0	0	FALSE
257044	CATSPERE	0	0	0	0	0	0	0	0	0	0	0	0	0	0	0	0	0	0	FALSE
57828	CATSPERG	0	0	0	0	0	0	0	0	0	0	0	0	0	0	0	0	0	0	FALSE
857	CAV1	0	0	0	0	0	0	0	0	0	0	0	0	0	0	0	0	0	0	FALSE
858	CAV2	0	0	0	0	0	0	0	0	0	0	0	0	0	0	0	0	0	0	FALSE
859	CAV3	0	0	0	0	0	0	0	0	0	0	0	0	0	0	0	0	0	0	FALSE
284119	CAVIN1	0	0	0	0	0	0	0	0	0	0	0	0	0	0	0	0	0	0	FALSE
8436	CAVIN2	0	0	0	0	0	0	0	0	0	0	0	0	0	0	0	0	0	0	FALSE
112464	CAVIN3	0	0	0	0	0	0	0	0	0	0	0	0	0	0	0	0	0	0	FALSE
347273	CAVIN4	0	0	0	0	0	0	0	0	0	0	0	0	0	0	0	0	0	0	FALSE
9139	CBFA2T2	0	0	0	0	0	0	0	0	0	0	0	0	0	0	0	0	0	0	FALSE
863	CBFA2T3	0	0	0	0	0	0	0	0	0	0	0	0	0	0	0	0	0	0	FALSE
865	CBFB	0	0	0	0	0	0	0	1	0	0	0	0	0	0	0	0	0	1	FALSE
867	CBL	0	0	0	0	0	0	0	0	0	0	0	0	0	0	0	0	0	0	FALSE
868	CBLB	0	0	0	0	0	0	0	0	0	0	0	0	0	0	0	0	0	0	FALSE
23624	CBLC	0	0	0	0	0	0	0	0	0	0	0	0	0	0	0	0	0	0	FALSE
79872	CBLL1	0	0	0	0	0	0	0	0	0	0	0	0	0	0	0	0	0	0	FALSE
158506	CBLL2	0	0	0	0	0	0	0	0	0	0	0	0	0	0	0	0	0	0	FALSE
869	CBLN1	0	0	0	0	0	0	0	0	0	0	0	0	0	0	0	0	0	0	FALSE
147381	CBLN2	0	0	0	0	0	0	0	0	0	0	0	0	0	0	0	0	0	0	FALSE
643866	CBLN3	0	0	0	0	0	0	0	0	0	0	0	0	0	0	0	0	0	0	FALSE
140689	CBLN4	0	0	0	0	0	0	0	0	0	0	0	0	0	0	0	0	0	0	FALSE
873	CBR1	0	0	0	0	0	0	0	0	0	0	0	0	0	0	0	0	0	0	FALSE
874	CBR3	0	0	0	0	0	0	0	0	0	0	0	0	0	0	0	0	0	0	FALSE
84869	CBR4	0	0	0	0	0	0	0	0	0	0	0	0	0	0	0	0	0	0	FALSE
55871	CBWD1	0	0	0	0	0	0	0	0	0	0	0	0	0	0	0	0	0	0	FALSE
150472	CBWD2	0	0	0	0	0	0	0	0	0	0	0	0	0	0	0	0	0	0	FALSE
10951	CBX1	0	0	0	0	0	0	0	0	0	0	0	0	0	0	0	0	0	0	FALSE
84733	CBX2	0	0	0	0	0	0	0	0	0	0	0	0	0	0	0	0	0	0	FALSE
11335	CBX3	0	0	0	0	0	0	0	0	0	0	0	0	0	0	0	0	0	0	FALSE
8535	CBX4	0	0	0	0	0	0	0	0	0	0	0	0	0	0	0	0	0	0	FALSE
23468	CBX5	0	0	0	0	0	0	0	0	0	0	0	0	0	0	0	0	0	0	FALSE
23466	CBX6	0	0	0	0	0	0	0	0	0	0	0	0	0	0	0	0	0	0	FALSE
23492	CBX7	0	0	0	0	0	0	0	0	0	0	0	0	0	0	0	0	0	0	FALSE
57332	CBX8	0	0	0	0	0	0	0	0	0	0	0	0	0	0	0	0	0	0	FALSE
54862	CC2D1A	0	0	0	0	0	0	0	0	0	0	0	0	0	0	0	0	0	0	FALSE
55749	CCAR1	0	0	0	0	0	0	0	0	0	1	0	0	0	0	0	0	0	1	FALSE
57805	CCAR2	0	0	0	0	0	0	0	0	0	0	0	0	0	0	0	0	0	0	FALSE
147372	CCBE1	0	0	0	0	0	0	0	0	0	0	0	0	0	0	0	0	0	0	FALSE
79839	CCDC102B	0	0	0	0	0	0	0	0	0	0	0	0	0	0	0	0	0	0	FALSE
256309	CCDC110	0	0	0	0	0	0	0	0	0	0	0	0	0	0	0	0	0	0	FALSE
153733	CCDC112	0	0	0	0	0	0	0	0	0	0	0	0	0	0	0	0	0	0	FALSE
29070	CCDC113	0	0	0	0	0	0	0	0	0	0	0	0	0	0	0	0	0	0	FALSE
93233	CCDC114	0	0	0	0	0	0	0	0	0	0	0	0	0	0	0	0	0	0	FALSE
84317	CCDC115	0	0	1	1	0	0	0	0	0	0	0	0	0	0	0	0	0	2	FALSE
164592	CCDC116	0	0	0	0	0	0	0	0	0	0	0	0	0	0	0	0	0	0	FALSE
150275	CCDC117	0	0	0	0	0	0	0	0	0	0	0	0	0	0	0	0	0	0	FALSE
151903	CCDC12	0	0	0	0	0	0	0	0	0	0	0	0	0	0	0	0	0	0	FALSE
79635	CCDC121	0	0	0	0	0	0	0	0	0	0	0	0	0	0	0	0	0	0	FALSE
160857	CCDC122	0	0	0	0	0	0	0	0	0	0	0	0	0	0	0	0	0	0	FALSE
90693	CCDC126	0	0	0	0	0	0	0	0	0	0	0	0	0	0	0	0	0	0	FALSE
64753	CCDC136	0	0	0	0	0	0	0	0	0	0	0	0	0	0	0	0	0	0	FALSE
165055	CCDC138	0	0	0	0	0	0	0	0	0	0	0	0	0	0	0	0	0	0	FALSE
64770	CCDC14	0	0	0	0	0	0	0	0	0	0	0	0	0	0	0	0	0	0	FALSE
151278	CCDC140	0	0	0	0	0	0	0	0	0	0	0	0	0	0	0	0	0	0	FALSE
9720	CCDC144A	0	0	0	0	0	0	0	0	0	0	0	0	0	0	0	0	0	0	FALSE
339184	CCDC144NL	0	0	0	0	0	0	0	0	0	0	0	0	0	0	0	0	0	0	FALSE
57639	CCDC146	0	0	0	0	0	0	0	0	0	0	0	0	0	0	0	0	0	0	FALSE
130940	CCDC148	0	0	0	0	0	0	0	0	0	0	0	0	0	0	0	0	0	0	FALSE
91050	CCDC149	0	0	0	0	0	0	0	0	0	0	0	0	0	0	0	0	0	0	FALSE
284992	CCDC150	0	0	0	0	0	0	0	0	0	0	0	0	0	0	0	0	0	0	FALSE
115948	CCDC151	0	0	0	0	0	0	0	0	0	0	0	0	0	0	0	0	0	0	FALSE
147872	CCDC155	0	0	0	0	0	0	0	0	0	0	0	0	0	0	0	0	0	0	FALSE
154467	CCDC167	0	0	0	0	0	0	0	0	0	0	0	0	0	0	0	0	0	0	FALSE
728591	CCDC169	0	0	0	0	0	0	0	0	0	0	0	0	0	0	0	0	0	0	FALSE
149483	CCDC17	0	0	0	0	0	0	0	0	0	0	0	0	0	0	0	0	0	0	FALSE
80129	CCDC170	0	0	0	0	0	0	0	0	0	0	0	0	0	0	0	0	0	0	FALSE
203238	CCDC171	0	0	0	0	0	0	0	0	0	0	0	0	0	0	0	0	0	0	FALSE
374355	CCDC172	0	0	0	0	0	0	0	0	0	0	0	0	0	0	0	0	0	0	FALSE
374864	CCDC178	0	0	0	0	0	0	0	0	0	0	0	0	0	0	0	0	0	0	FALSE
100499483	CCDC180	0	0	0	0	0	0	0	0	0	0	0	0	0	0	0	0	0	0	FALSE
57821	CCDC181	0	0	0	0	0	0	0	0	0	0	0	0	0	0	0	0	0	0	FALSE
84960	CCDC183	0	0	0	0	0	0	0	0	0	0	0	0	0	0	0	0	0	0	FALSE
55088	CCDC186	0	0	0	0	0	0	0	0	0	0	0	0	0	0	0	0	0	0	FALSE
90835	CCDC189	0	0	0	0	0	0	0	0	0	0	0	0	0	0	0	0	0	0	FALSE
339512	CCDC190	0	0	0	0	0	0	0	0	0	0	0	0	0	0	0	0	0	0	FALSE
57577	CCDC191	0	0	0	0	0	0	0	0	0	0	0	0	0	0	0	0	0	0	FALSE
55195	CCDC198	0	0	0	0	0	0	0	0	0	0	0	0	0	0	0	0	0	0	FALSE
28952	CCDC22	0	0	0	0	0	0	0	0	0	0	0	0	0	0	0	0	0	0	FALSE
55246	CCDC25	0	0	0	0	0	0	0	0	0	0	0	0	0	0	0	0	0	0	FALSE
148870	CCDC27	0	0	0	0	0	0	0	0	0	0	0	0	0	0	0	0	0	0	FALSE
25901	CCDC28A	0	0	0	0	0	0	0	0	0	0	0	0	0	0	0	0	0	0	FALSE
79140	CCDC28B	0	0	0	0	0	0	0	0	0	0	0	0	0	0	0	0	0	0	FALSE
83643	CCDC3	0	0	0	0	0	0	0	0	0	0	0	0	0	0	0	0	0	0	FALSE
91057	CCDC34	0	0	0	0	0	0	0	0	0	0	0	0	0	0	0	0	0	0	FALSE
339834	CCDC36	0	0	0	0	0	0	0	0	0	0	0	0	0	0	0	0	0	0	FALSE
120935	CCDC38	0	0	0	0	0	0	0	0	0	0	0	0	0	0	0	0	0	0	FALSE
146849	CCDC42	0	0	0	0	0	0	0	0	0	0	0	0	0	0	0	0	0	0	FALSE
57003	CCDC47	0	0	0	0	0	0	0	0	0	0	0	0	0	0	0	0	0	0	FALSE
152137	CCDC50	0	0	0	0	0	0	0	0	0	0	0	0	0	0	0	0	0	0	FALSE
79714	CCDC51	0	0	0	0	0	0	0	0	0	0	0	0	0	0	0	0	0	0	FALSE
84692	CCDC54	0	0	0	0	0	0	0	0	0	0	0	0	0	0	0	0	0	0	FALSE
131076	CCDC58	0	0	0	0	0	0	0	0	0	0	0	0	0	0	0	0	0	0	FALSE
8030	CCDC6	0	0	0	0	0	0	0	0	0	0	0	0	0	0	0	0	0	0	FALSE
160777	CCDC60	0	0	0	0	0	0	0	0	0	0	0	0	0	0	0	0	0	0	FALSE
84660	CCDC62	0	0	0	0	0	0	0	0	0	0	0	0	0	0	0	0	0	0	FALSE
160762	CCDC63	0	0	0	0	0	0	0	0	0	0	0	0	0	0	0	0	0	0	FALSE
85478	CCDC65	0	0	0	0	0	0	0	0	0	0	0	0	0	0	0	0	0	0	FALSE
285331	CCDC66	0	0	0	0	0	0	0	0	0	0	0	0	0	0	0	0	0	0	FALSE
[truncated: 13,848 more rows]

## Sheet: S60_C40
EntrezID	GeneSymbol	bone	breast	central_nervous_system	colorectal	esophagus	gastric	kidney	leukemia	liver	lung	multiple_myeloma	ovary	pancreas	skin	upper_aerodigestive	urinary_tract	uterus	n_dependent_lineage	is_commonly_essential
1	A1BG	0	0	0	0	0	0	0	0	0	0	0	0	0	0	0	0	0	0	FALSE
29974	A1CF	0	0	0	0	0	0	0	0	0	0	0	0	0	0	0	0	0	0	FALSE
2	A2M	0	0	0	0	0	0	0	0	0	0	0	0	0	0	0	0	0	0	FALSE
144568	A2ML1	0	0	0	0	0	0	0	0	0	0	0	0	0	0	0	0	0	0	FALSE
53947	A4GALT	0	0	0	0	0	0	0	0	0	0	0	0	0	0	0	0	0	0	FALSE
51146	A4GNT	0	0	0	0	0	0	0	0	0	0	0	0	0	0	0	0	0	0	FALSE
8086	AAAS	0	0	0	0	0	0	0	0	0	0	0	0	0	0	0	0	0	0	FALSE
65985	AACS	0	0	0	0	0	0	0	0	0	0	0	0	0	0	0	0	0	0	FALSE
13	AADAC	0	0	0	0	0	0	0	0	0	0	0	0	0	0	0	0	0	0	FALSE
344752	AADACL2	0	0	0	0	0	0	0	0	0	0	0	0	0	0	0	0	0	0	FALSE
343066	AADACL4	0	0	0	0	0	0	0	0	0	0	0	0	0	0	0	0	0	0	FALSE
51166	AADAT	0	0	0	0	0	0	0	0	0	0	0	0	0	0	0	0	0	0	FALSE
195827	PRXL2C	0	0	0	0	0	0	0	0	0	0	0	0	0	0	0	0	0	0	FALSE
79719	AAGAB	0	0	0	0	0	0	0	0	0	0	0	0	0	0	0	0	0	0	FALSE
22848	AAK1	0	0	0	0	0	0	0	0	0	0	0	0	0	0	0	0	0	0	FALSE
28971	AAMDC	0	0	0	0	0	0	0	0	0	0	0	0	0	0	0	0	0	0	FALSE
14	AAMP	0	1	1	1	1	1	0	1	0	1	0	1	1	1	1	0	1	12	FALSE
15	AANAT	0	0	0	0	0	0	0	0	0	0	0	0	0	0	0	0	0	0	FALSE
25980	AAR2	0	0	0	0	0	0	0	0	0	0	0	0	0	0	0	0	0	0	FALSE
441376	AARD	0	0	0	0	0	0	0	0	0	0	0	0	0	0	0	0	0	0	FALSE
16	AARS	1	1	1	1	1	1	1	1	1	1	1	1	1	1	1	1	1	17	TRUE
57505	AARS2	0	1	0	0	0	0	0	0	0	1	0	0	0	0	0	1	0	3	FALSE
132949	AASDH	0	0	0	0	0	0	0	0	0	0	0	0	0	0	0	0	0	0	FALSE
60496	AASDHPPT	0	0	0	0	0	0	0	0	0	0	0	0	0	0	0	0	0	0	FALSE
10157	AASS	0	0	0	0	0	0	0	0	0	0	0	0	0	0	0	0	0	0	FALSE
26574	AATF	0	1	0	0	0	0	0	0	0	1	0	0	0	0	0	0	1	3	FALSE
9625	AATK	0	0	0	0	0	0	0	0	0	0	0	0	0	0	0	0	0	0	FALSE
18	ABAT	0	0	0	0	0	0	0	0	0	0	0	0	0	0	0	0	0	0	FALSE
19	ABCA1	0	0	0	0	0	0	0	0	0	0	0	0	0	0	0	0	0	0	FALSE
10349	ABCA10	0	0	0	0	0	0	0	0	0	0	0	0	0	0	0	0	0	0	FALSE
26154	ABCA12	0	0	0	0	0	0	0	0	0	0	0	0	0	0	0	0	0	0	FALSE
154664	ABCA13	0	0	0	0	0	0	0	0	0	0	0	0	0	0	0	0	0	0	FALSE
20	ABCA2	0	0	0	0	0	0	0	0	0	0	0	0	0	0	0	0	0	0	FALSE
21	ABCA3	0	0	0	0	0	0	0	0	0	0	0	0	0	0	0	0	0	0	FALSE
24	ABCA4	0	0	0	0	0	0	0	0	0	0	0	0	0	0	0	0	0	0	FALSE
23461	ABCA5	0	0	0	0	0	0	0	0	0	0	0	0	0	0	0	0	0	0	FALSE
23460	ABCA6	0	0	0	0	0	0	0	0	0	0	0	0	0	0	0	0	0	0	FALSE
10347	ABCA7	0	0	0	0	0	0	0	0	0	0	0	0	0	0	0	0	0	0	FALSE
10351	ABCA8	0	0	0	0	0	0	0	0	0	0	0	0	0	0	0	0	0	0	FALSE
10350	ABCA9	0	0	0	0	0	0	0	0	0	0	0	0	0	0	0	0	0	0	FALSE
5243	ABCB1	0	0	0	0	0	0	0	0	0	0	0	0	0	0	0	0	0	0	FALSE
23456	ABCB10	0	0	0	0	0	0	0	0	0	0	0	0	0	0	0	0	0	0	FALSE
8647	ABCB11	0	0	0	0	0	0	0	0	0	0	0	0	0	0	0	0	0	0	FALSE
5244	ABCB4	0	0	0	0	0	0	0	0	0	0	0	0	0	0	0	0	0	0	FALSE
340273	ABCB5	0	0	0	0	0	0	0	0	0	0	0	0	0	0	0	0	0	0	FALSE
10058	ABCB6	0	0	0	0	0	0	0	0	0	0	0	0	0	0	0	0	0	0	FALSE
22	ABCB7	1	1	1	1	1	1	1	1	1	1	1	1	1	1	1	1	1	17	TRUE
11194	ABCB8	0	0	0	0	0	0	0	0	0	0	0	0	0	0	0	0	0	0	FALSE
23457	ABCB9	0	0	0	0	0	0	0	0	0	0	0	0	0	0	0	0	0	0	FALSE
4363	ABCC1	0	0	0	0	0	0	0	0	0	0	0	0	0	0	0	0	0	0	FALSE
89845	ABCC10	0	0	0	0	0	0	0	0	0	0	0	0	0	0	0	0	0	0	FALSE
85320	ABCC11	0	0	0	0	0	0	0	0	0	0	0	0	0	0	0	0	0	0	FALSE
94160	ABCC12	0	0	0	0	0	0	0	0	0	0	0	0	0	0	0	0	0	0	FALSE
1244	ABCC2	0	0	0	0	0	0	0	0	0	0	0	0	0	0	0	0	0	0	FALSE
8714	ABCC3	0	0	0	0	0	0	0	0	0	0	0	0	0	0	0	0	0	0	FALSE
10257	ABCC4	0	0	0	0	0	0	0	0	0	0	0	0	0	0	0	0	0	0	FALSE
10057	ABCC5	0	0	0	0	0	0	0	0	0	0	0	0	0	0	0	0	0	0	FALSE
368	ABCC6	0	0	0	0	0	0	0	0	0	0	0	0	0	0	0	0	0	0	FALSE
6833	ABCC8	0	0	0	0	0	0	0	0	0	0	0	0	0	0	0	0	0	0	FALSE
10060	ABCC9	0	0	0	0	0	0	0	0	0	0	0	0	0	0	0	0	0	0	FALSE
215	ABCD1	0	0	0	0	0	0	0	0	0	0	0	0	0	0	0	0	0	0	FALSE
225	ABCD2	0	0	0	0	0	0	0	0	0	0	0	0	0	0	0	0	0	0	FALSE
5825	ABCD3	0	0	0	0	0	0	0	0	0	0	0	0	0	0	0	0	0	0	FALSE
5826	ABCD4	0	0	0	0	0	0	0	0	0	0	0	0	0	0	0	0	0	0	FALSE
6059	ABCE1	1	1	1	1	1	1	1	1	1	1	1	1	1	1	1	1	1	17	TRUE
23	ABCF1	1	1	1	1	1	1	1	1	1	1	1	1	1	1	1	1	1	17	TRUE
10061	ABCF2	0	0	0	0	0	0	0	0	0	0	0	0	0	0	0	0	0	0	FALSE
55324	ABCF3	0	0	0	0	0	0	0	0	0	0	0	0	0	0	0	0	0	0	FALSE
9619	ABCG1	0	0	0	0	0	0	0	0	0	0	0	0	0	0	0	0	0	0	FALSE
9429	ABCG2	0	0	0	0	0	0	0	0	0	0	0	0	0	0	0	0	0	0	FALSE
64137	ABCG4	0	0	0	0	0	0	0	0	0	0	0	0	0	0	0	0	0	0	FALSE
64240	ABCG5	0	0	0	0	0	0	0	0	0	0	0	0	0	0	0	0	0	0	FALSE
64241	ABCG8	0	0	0	0	0	0	0	0	0	0	0	0	0	0	0	0	0	0	FALSE
55347	ABHD10	0	0	0	0	0	0	0	0	0	0	0	0	0	0	0	0	0	0	FALSE
83451	ABHD11	0	0	0	0	0	0	0	0	0	0	0	0	0	0	0	0	0	0	FALSE
26090	ABHD12	0	0	0	0	0	0	0	0	0	0	0	0	0	0	0	0	0	0	FALSE
145447	ABHD12B	0	0	0	0	0	0	0	0	0	0	0	0	0	0	0	0	0	0	FALSE
84945	ABHD13	0	0	0	0	0	0	0	0	0	0	0	0	0	0	0	0	0	0	FALSE
25864	ABHD14A	0	0	0	0	0	0	0	0	0	0	0	0	0	0	0	0	0	0	FALSE
84836	ABHD14B	0	0	0	0	0	0	0	0	0	0	0	0	0	0	0	0	0	0	FALSE
116236	ABHD15	0	0	0	0	0	0	0	0	0	0	0	0	0	0	0	0	0	0	FALSE
7920	ABHD16A	0	0	0	0	0	0	0	0	0	0	0	0	0	0	0	0	0	0	FALSE
140701	ABHD16B	0	0	0	0	0	0	0	0	0	0	0	0	0	0	0	0	0	0	FALSE
81926	ABHD17A	0	0	0	0	0	0	0	0	0	0	0	0	0	0	0	0	0	0	FALSE
51104	ABHD17B	0	0	0	0	0	0	0	0	0	0	0	0	0	0	0	0	0	0	FALSE
11057	ABHD2	0	0	0	0	0	0	0	0	0	0	0	0	0	0	0	0	0	0	FALSE
171586	ABHD3	0	0	0	0	0	0	0	0	0	0	0	0	0	0	0	0	0	0	FALSE
63874	ABHD4	0	0	0	0	0	0	0	0	0	0	0	0	0	0	0	0	0	0	FALSE
51099	ABHD5	0	0	0	0	0	0	0	0	0	0	0	0	0	0	0	0	0	0	FALSE
57406	ABHD6	0	0	0	0	0	0	0	0	0	0	0	0	0	0	0	0	0	0	FALSE
79575	ABHD8	0	0	0	0	0	0	0	0	0	0	0	0	0	0	0	0	0	0	FALSE
10006	ABI1	0	0	0	0	0	0	0	0	0	0	0	0	0	0	0	0	0	0	FALSE
10152	ABI2	0	0	0	0	0	0	0	0	0	0	0	0	0	0	0	0	0	0	FALSE
51225	ABI3	0	0	0	0	0	0	0	0	0	0	0	0	0	0	0	0	0	0	FALSE
25	ABL1	0	0	0	0	0	0	0	0	0	0	0	0	0	0	0	0	0	0	FALSE
27	ABL2	0	0	0	0	0	0	0	0	0	0	0	0	0	0	0	0	0	0	FALSE
3983	ABLIM1	0	0	0	0	0	0	0	0	0	0	0	0	0	0	0	0	0	0	FALSE
84448	ABLIM2	0	0	0	0	0	0	0	0	0	0	0	0	0	0	0	0	0	0	FALSE
22885	ABLIM3	0	0	0	0	0	0	0	0	0	0	0	0	0	0	0	0	0	0	FALSE
29	ABR	0	0	0	0	0	0	0	0	0	0	0	0	0	0	0	0	0	0	FALSE
137735	ABRA	0	0	0	0	0	0	0	0	0	0	0	0	0	0	0	0	0	0	FALSE
84142	ABRAXAS1	0	0	0	0	0	0	0	0	0	0	0	0	0	0	0	0	0	0	FALSE
23172	ABRAXAS2	0	0	0	0	0	0	0	0	0	0	0	0	0	0	0	0	0	0	FALSE
29777	ABT1	0	0	0	0	0	0	0	0	0	0	0	0	0	0	0	0	0	0	FALSE
80325	ABTB1	0	0	0	0	0	0	0	0	0	0	0	0	0	0	0	0	0	0	FALSE
25841	ABTB2	0	0	0	0	0	0	0	0	0	0	0	0	0	0	0	0	0	0	FALSE
30	ACAA1	0	0	0	0	0	0	0	0	0	0	0	0	0	0	0	0	0	0	FALSE
10449	ACAA2	0	0	0	0	0	0	0	0	0	0	0	0	0	0	0	0	0	0	FALSE
31	ACACA	0	0	0	0	0	0	0	0	0	0	0	0	0	0	0	0	0	0	FALSE
32	ACACB	0	0	0	0	0	0	0	0	0	0	0	0	0	0	0	0	0	0	FALSE
80724	ACAD10	0	0	0	0	0	0	0	0	0	0	0	0	0	0	0	0	0	0	FALSE
84129	ACAD11	0	0	0	0	0	0	0	0	0	0	0	0	0	0	0	0	0	0	FALSE
27034	ACAD8	0	0	0	0	0	0	0	0	0	0	0	0	0	0	0	0	0	0	FALSE
28976	ACAD9	0	0	0	0	0	0	0	0	0	0	0	0	0	0	0	0	0	0	FALSE
33	ACADL	0	0	0	0	0	0	0	0	0	0	0	0	0	0	0	0	0	0	FALSE
34	ACADM	0	0	0	0	0	0	0	0	0	0	0	0	0	0	0	0	0	0	FALSE
35	ACADS	0	0	0	0	0	0	0	0	0	0	0	0	0	0	0	0	0	0	FALSE
36	ACADSB	0	0	0	0	0	0	0	0	0	0	0	0	0	0	0	0	0	0	FALSE
37	ACADVL	0	0	0	0	0	0	0	0	0	0	0	0	0	0	0	0	0	0	FALSE
176	ACAN	0	0	0	0	0	0	0	0	0	0	0	0	0	0	0	0	0	0	FALSE
9744	ACAP1	0	0	0	0	0	0	0	0	0	0	0	0	0	0	0	0	0	0	FALSE
23527	ACAP2	0	0	0	0	0	0	0	0	0	0	0	0	0	0	0	0	0	0	FALSE
116983	ACAP3	0	0	0	0	0	0	0	0	0	0	0	0	0	0	0	0	0	0	FALSE
38	ACAT1	0	0	0	0	0	0	0	0	0	0	0	0	0	0	0	0	0	0	FALSE
39	ACAT2	0	0	0	0	0	0	0	0	0	0	0	0	0	0	0	0	0	0	FALSE
64746	ACBD3	0	0	0	0	0	0	0	0	0	0	0	0	0	0	0	0	0	0	FALSE
79777	ACBD4	0	0	0	0	0	0	0	0	0	0	0	0	0	0	0	0	0	0	FALSE
91452	ACBD5	0	0	0	0	0	0	0	0	0	0	0	0	0	0	0	0	0	0	FALSE
84320	ACBD6	0	0	0	0	0	0	0	0	0	0	0	0	0	0	0	0	0	0	FALSE
84680	ACCS	0	0	0	0	0	0	0	0	0	0	0	0	0	0	0	0	0	0	FALSE
390110	ACCSL	0	0	0	0	0	0	0	0	0	0	0	0	0	0	0	0	0	0	FALSE
65057	ACD	0	0	0	0	0	0	0	0	0	0	0	0	0	0	0	0	0	0	FALSE
1636	ACE	0	0	0	0	0	0	0	0	0	0	0	0	0	0	0	0	0	0	FALSE
59272	ACE2	0	0	0	0	0	0	0	0	0	0	0	0	0	0	0	0	0	0	FALSE
125981	ACER1	0	0	0	0	0	0	0	0	0	0	0	0	0	0	0	0	0	0	FALSE
340485	ACER2	0	0	0	0	0	0	0	0	0	0	0	0	0	0	0	0	0	0	FALSE
55331	ACER3	0	0	0	0	0	0	0	0	0	0	0	0	0	0	0	0	0	0	FALSE
43	ACHE	0	0	0	0	0	0	0	0	0	0	0	0	0	0	0	0	0	0	FALSE
22985	ACIN1	0	0	1	0	0	1	0	1	0	1	1	0	0	0	0	0	0	5	FALSE
2532	ACKR1	0	0	0	0	0	0	0	0	0	0	0	0	0	0	0	0	0	0	FALSE
1238	ACKR2	0	0	0	0	0	0	0	0	0	0	0	0	0	0	0	0	0	0	FALSE
57007	ACKR3	0	0	0	0	0	0	0	0	0	0	0	0	0	0	0	0	0	0	FALSE
51554	ACKR4	0	0	0	0	0	0	0	0	0	0	0	0	0	0	0	0	0	0	FALSE
47	ACLY	0	0	0	1	0	0	0	1	0	1	1	0	0	1	0	0	0	5	FALSE
130013	ACMSD	0	0	0	0	0	0	0	0	0	0	0	0	0	0	0	0	0	0	FALSE
48	ACO1	0	0	0	0	0	0	0	0	0	0	0	0	0	0	0	0	0	0	FALSE
50	ACO2	0	1	0	1	0	0	0	0	0	1	1	0	0	0	0	0	0	4	FALSE
641371	ACOT1	0	0	0	0	0	0	0	0	0	0	0	0	0	0	0	0	0	0	FALSE
26027	ACOT11	0	0	0	0	0	0	0	0	0	0	0	0	0	0	0	0	0	0	FALSE
134526	ACOT12	0	0	0	0	0	0	0	0	0	0	0	0	0	0	0	0	0	0	FALSE
55856	ACOT13	0	0	0	0	0	0	0	0	0	0	0	0	0	0	0	0	0	0	FALSE
10965	ACOT2	0	0	0	0	0	0	0	0	0	0	0	0	0	0	0	0	0	0	FALSE
122970	ACOT4	0	0	0	0	0	0	0	0	0	0	0	0	0	0	0	0	0	0	FALSE
11332	ACOT7	0	0	0	0	0	0	0	0	0	0	0	0	0	0	0	0	0	0	FALSE
10005	ACOT8	0	0	0	0	0	0	0	0	0	0	0	0	0	0	0	0	0	0	FALSE
23597	ACOT9	0	0	0	0	0	0	0	0	0	0	0	0	0	0	0	0	0	0	FALSE
51	ACOX1	0	0	0	0	0	0	0	0	0	0	0	0	0	0	0	0	0	0	FALSE
8309	ACOX2	0	0	0	0	0	0	0	0	0	0	0	0	0	0	0	0	0	0	FALSE
8310	ACOX3	0	0	0	0	0	0	0	0	0	0	0	0	0	0	0	0	0	0	FALSE
55289	ACOXL	0	0	0	0	0	0	0	0	0	0	0	0	0	0	0	0	0	0	FALSE
52	ACP1	0	0	0	0	0	0	0	0	0	0	0	0	0	0	0	0	0	0	FALSE
53	ACP2	0	0	0	0	0	0	0	0	0	0	0	0	0	0	0	0	0	0	FALSE
54	ACP5	0	0	0	0	0	0	0	0	0	0	0	0	0	0	0	0	0	0	FALSE
51205	ACP6	0	0	0	0	0	0	0	0	0	0	0	0	0	0	0	0	0	0	FALSE
390928	ACP7	0	0	0	0	0	0	0	0	0	0	0	0	0	0	0	0	0	0	FALSE
55	ACPP	0	0	0	0	0	0	0	0	0	0	0	0	0	0	0	0	0	0	FALSE
49	ACR	0	0	0	0	0	0	0	0	0	0	0	0	0	0	0	0	0	0	FALSE
84519	ACRBP	0	0	0	0	0	0	0	0	0	0	0	0	0	0	0	0	0	0	FALSE
56	ACRV1	0	0	0	0	0	0	0	0	0	0	0	0	0	0	0	0	0	0	FALSE
23205	ACSBG1	0	0	0	0	0	0	0	0	0	0	0	0	0	0	0	0	0	0	FALSE
81616	ACSBG2	0	0	0	0	0	0	0	0	0	0	0	0	0	0	0	0	0	0	FALSE
80221	ACSF2	0	0	0	0	0	0	0	0	0	0	0	0	0	0	0	0	0	0	FALSE
197322	ACSF3	0	0	0	0	0	0	0	0	0	0	0	0	0	0	0	0	0	0	FALSE
2180	ACSL1	0	0	0	0	0	0	0	0	0	0	0	0	0	0	0	0	0	0	FALSE
2181	ACSL3	0	0	0	0	0	0	0	0	0	0	0	0	0	0	0	0	0	0	FALSE
2182	ACSL4	0	0	0	0	0	0	0	0	0	0	0	0	0	0	0	0	0	0	FALSE
51703	ACSL5	0	0	0	0	0	0	0	0	0	0	0	0	0	0	0	0	0	0	FALSE
23305	ACSL6	0	0	0	0	0	0	0	0	0	0	0	0	0	0	0	0	0	0	FALSE
116285	ACSM1	0	0	0	0	0	0	0	0	0	0	0	0	0	0	0	0	0	0	FALSE
348158	ACSM2B	0	0	0	0	0	0	0	0	0	0	0	0	0	0	0	0	0	0	FALSE
6296	ACSM3	0	0	0	0	0	0	0	0	0	0	0	0	0	0	0	0	0	0	FALSE
54988	ACSM5	0	0	0	0	0	0	0	0	0	0	0	0	0	0	0	0	0	0	FALSE
142827	ACSM6	0	0	0	0	0	0	0	0	0	0	0	0	0	0	0	0	0	0	FALSE
84532	ACSS1	0	0	0	0	0	0	0	0	0	0	0	0	0	0	0	0	0	0	FALSE
55902	ACSS2	0	0	0	0	0	0	0	0	0	0	0	0	0	0	0	0	0	0	FALSE
79611	ACSS3	0	0	0	0	0	0	0	0	0	0	0	0	0	0	0	0	0	0	FALSE
58	ACTA1	0	0	0	0	0	0	0	0	0	0	0	0	0	0	0	0	0	0	FALSE
59	ACTA2	0	0	0	0	0	0	0	0	0	0	0	0	0	0	0	0	0	0	FALSE
60	ACTB	0	1	1	0	1	1	0	1	1	1	0	0	0	0	1	1	0	9	FALSE
345651	ACTBL2	0	0	0	0	0	0	0	0	0	0	0	0	0	0	0	0	0	0	FALSE
70	ACTC1	0	0	0	0	0	0	0	0	0	0	0	0	0	0	0	0	0	0	FALSE
71	ACTG1	0	0	0	1	1	0	1	0	0	1	0	0	0	0	0	0	0	4	FALSE
72	ACTG2	0	0	0	0	0	0	0	0	0	0	0	0	0	0	0	0	0	0	FALSE
86	ACTL6A	1	1	1	1	1	1	1	1	1	1	1	1	1	1	1	1	1	17	TRUE
51412	ACTL6B	0	0	0	0	0	0	0	0	0	0	0	0	0	0	0	0	0	0	FALSE
10881	ACTL7A	0	0	0	0	0	0	0	0	0	0	0	0	0	0	0	0	0	0	FALSE
10880	ACTL7B	0	0	0	0	0	0	0	0	0	0	0	0	0	0	0	0	0	0	FALSE
81569	ACTL8	0	0	0	0	0	0	0	0	0	0	0	0	0	0	0	0	0	0	FALSE
284382	ACTL9	0	0	0	0	0	0	0	0	0	0	0	0	0	0	0	0	0	0	FALSE
87	ACTN1	0	0	0	0	0	0	0	0	0	0	0	0	0	0	0	0	0	0	FALSE
88	ACTN2	0	0	0	0	0	0	0	0	0	0	0	0	0	0	0	0	0	0	FALSE
81	ACTN4	0	0	0	0	0	0	0	0	0	0	0	0	0	0	0	0	0	0	FALSE
55860	ACTR10	1	1	1	1	1	1	1	1	1	1	1	1	1	1	1	1	1	17	TRUE
10121	ACTR1A	1	1	1	1	1	1	1	1	1	1	1	1	1	1	1	1	1	17	TRUE
10120	ACTR1B	0	0	0	0	0	0	0	0	0	0	0	0	0	0	0	0	0	0	FALSE
10097	ACTR2	1	1	1	1	1	1	1	1	1	1	1	1	1	1	1	1	1	17	TRUE
10096	ACTR3	0	0	0	0	0	0	0	0	0	0	0	0	0	0	0	0	0	0	FALSE
57180	ACTR3B	0	0	0	0	0	0	0	0	0	0	0	0	0	0	0	0	0	0	FALSE
79913	ACTR5	0	0	0	0	0	0	0	0	0	0	0	0	0	0	0	0	0	0	FALSE
64431	ACTR6	1	1	1	1	1	1	1	1	1	1	1	1	1	1	1	1	1	17	TRUE
93973	ACTR8	1	1	1	1	1	1	1	1	1	1	1	1	1	1	1	1	1	17	TRUE
139741	ACTRT1	0	0	0	0	0	0	0	0	0	0	0	0	0	0	0	0	0	0	FALSE
140625	ACTRT2	0	0	0	0	0	0	0	0	0	0	0	0	0	0	0	0	0	0	FALSE
84517	ACTRT3	0	0	0	0	0	0	0	0	0	0	0	0	0	0	0	0	0	0	FALSE
90	ACVR1	0	0	0	0	0	0	0	0	0	0	0	0	0	0	0	0	0	0	FALSE
91	ACVR1B	0	0	0	0	0	0	0	0	0	0	0	0	0	0	0	0	0	0	FALSE
130399	ACVR1C	0	0	0	0	0	0	0	0	0	0	0	0	0	0	0	0	0	0	FALSE
92	ACVR2A	0	0	0	0	0	0	0	0	0	0	0	0	0	0	0	0	0	0	FALSE
93	ACVR2B	0	0	0	0	0	0	0	0	0	0	0	0	0	0	0	0	0	0	FALSE
94	ACVRL1	0	0	0	0	0	0	0	0	0	0	0	0	0	0	0	0	0	0	FALSE
95	ACY1	0	0	0	0	0	0	0	0	0	0	0	0	0	0	0	0	0	0	FALSE
91703	ACY3	0	0	0	0	0	0	0	0	0	0	0	0	0	0	0	0	0	0	FALSE
97	ACYP1	0	0	0	0	0	0	0	0	0	0	0	0	0	0	0	0	0	0	FALSE
98	ACYP2	0	0	0	0	0	0	0	0	0	0	0	0	0	0	0	0	0	0	FALSE
100	ADA	0	0	0	0	0	0	0	0	0	0	0	0	0	0	0	0	0	0	FALSE
51816	ADA2	0	0	0	0	0	0	0	0	0	0	0	0	0	0	0	0	0	0	FALSE
132612	ADAD1	0	0	0	0	0	0	0	0	0	0	0	0	0	0	0	0	0	0	FALSE
161931	ADAD2	0	0	0	0	0	0	0	0	0	0	0	0	0	0	0	0	0	0	FALSE
161823	ADAL	0	0	0	0	0	0	0	0	0	0	0	0	0	0	0	0	0	0	FALSE
102	ADAM10	0	0	0	0	0	0	0	0	0	0	0	0	0	0	0	0	0	0	FALSE
4185	ADAM11	0	0	0	0	0	0	0	0	0	0	0	0	0	0	0	0	0	0	FALSE
8038	ADAM12	0	0	0	0	0	0	0	0	0	0	0	0	0	0	0	0	0	0	FALSE
8751	ADAM15	0	0	0	0	0	0	0	0	0	0	0	0	0	0	0	0	0	0	FALSE
6868	ADAM17	0	0	0	0	0	0	0	0	0	0	0	0	0	0	0	0	0	0	FALSE
8749	ADAM18	0	0	0	0	0	0	0	0	0	0	0	0	0	0	0	0	0	0	FALSE
8728	ADAM19	0	0	0	0	0	0	0	0	0	0	0	0	0	0	0	0	0	0	FALSE
2515	ADAM2	0	0	0	0	0	0	0	0	0	0	0	0	0	0	0	0	0	0	FALSE
8748	ADAM20	0	0	0	0	0	0	0	0	0	0	0	0	0	0	0	0	0	0	FALSE
8747	ADAM21	0	0	0	0	0	0	0	0	0	0	0	0	0	0	0	0	0	0	FALSE
53616	ADAM22	0	0	0	0	0	0	0	0	0	0	0	0	0	0	0	0	0	0	FALSE
8745	ADAM23	0	0	0	0	0	0	0	0	0	0	0	0	0	0	0	0	0	0	FALSE
10863	ADAM28	0	0	0	0	0	0	0	0	0	0	0	0	0	0	0	0	0	0	FALSE
11086	ADAM29	0	0	0	0	0	0	0	0	0	0	0	0	0	0	0	0	0	0	FALSE
11085	ADAM30	0	0	0	0	0	0	0	0	0	0	0	0	0	0	0	0	0	0	FALSE
203102	ADAM32	0	0	0	0	0	0	0	0	0	0	0	0	0	0	0	0	0	0	FALSE
80332	ADAM33	0	0	0	0	0	0	0	0	0	0	0	0	0	0	0	0	0	0	FALSE
8756	ADAM7	0	0	0	0	0	0	0	0	0	0	0	0	0	0	0	0	0	0	FALSE
101	ADAM8	0	0	0	0	0	0	0	0	0	0	0	0	0	0	0	0	0	0	FALSE
8754	ADAM9	0	0	0	0	0	0	0	0	0	0	0	0	0	0	0	0	0	0	FALSE
27299	ADAMDEC1	0	0	0	0	0	0	0	0	0	0	0	0	0	0	0	0	0	0	FALSE
9510	ADAMTS1	0	0	0	0	0	0	0	0	0	0	0	0	0	0	0	0	0	0	FALSE
81794	ADAMTS10	0	0	0	0	0	0	0	0	0	0	0	0	0	0	0	0	0	0	FALSE
81792	ADAMTS12	0	0	0	0	0	0	0	0	0	0	0	0	0	0	0	0	0	0	FALSE
11093	ADAMTS13	0	0	0	0	0	0	0	0	0	0	0	0	0	0	0	0	0	0	FALSE
140766	ADAMTS14	0	0	0	0	0	0	0	0	0	0	0	0	0	0	0	0	0	0	FALSE
170689	ADAMTS15	0	0	0	0	0	0	0	0	0	0	0	0	0	0	0	0	0	0	FALSE
170690	ADAMTS16	0	0	0	0	0	0	0	0	0	0	0	0	0	0	0	0	0	0	FALSE
170691	ADAMTS17	0	0	0	0	0	0	0	0	0	0	0	0	0	0	0	0	0	0	FALSE
170692	ADAMTS18	0	0	0	0	0	0	0	0	0	0	0	0	0	0	0	0	0	0	FALSE
171019	ADAMTS19	0	0	0	0	0	0	0	0	0	0	0	0	0	0	0	0	0	0	FALSE
9509	ADAMTS2	0	0	0	0	0	0	0	0	0	0	0	0	0	0	0	0	0	0	FALSE
80070	ADAMTS20	0	0	0	0	0	0	0	0	0	0	0	0	0	0	0	0	0	0	FALSE
9508	ADAMTS3	0	0	0	0	0	0	0	0	0	0	0	0	0	0	0	0	0	0	FALSE
9507	ADAMTS4	0	0	0	0	0	0	0	0	0	0	0	0	0	0	0	0	0	0	FALSE
11096	ADAMTS5	0	0	0	0	0	0	0	0	0	0	0	0	0	0	0	0	0	0	FALSE
11174	ADAMTS6	0	0	0	0	0	0	0	0	0	0	0	0	0	0	0	0	0	0	FALSE
11173	ADAMTS7	0	0	0	0	0	0	0	0	0	0	0	0	0	0	0	0	0	0	FALSE
11095	ADAMTS8	0	0	0	0	0	0	0	0	0	0	0	0	0	0	0	0	0	0	FALSE
56999	ADAMTS9	0	0	0	0	0	0	0	0	0	0	0	0	0	0	0	0	0	0	FALSE
92949	ADAMTSL1	0	0	0	0	0	0	0	0	0	0	0	0	0	0	0	0	0	0	FALSE
9719	ADAMTSL2	0	0	0	0	0	0	0	0	0	0	0	0	0	0	0	0	0	0	FALSE
57188	ADAMTSL3	0	0	0	0	0	0	0	0	0	0	0	0	0	0	0	0	0	0	FALSE
54507	ADAMTSL4	0	0	0	0	0	0	0	0	0	0	0	0	0	0	0	0	0	0	FALSE
339366	ADAMTSL5	0	0	0	0	0	0	0	0	0	0	0	0	0	0	0	0	0	0	FALSE
11033	ADAP1	0	0	0	0	0	0	0	0	0	0	0	0	0	0	0	0	0	0	FALSE
55803	ADAP2	0	0	0	0	0	0	0	0	0	0	0	0	0	0	0	0	0	0	FALSE
103	ADAR	0	0	0	0	0	0	0	0	0	0	0	0	0	0	0	0	0	0	FALSE
104	ADARB1	0	0	0	0	0	0	0	0	0	0	0	0	0	0	0	0	0	0	FALSE
105	ADARB2	0	0	0	0	0	0	0	0	0	0	0	0	0	0	0	0	0	0	FALSE
23536	ADAT1	0	0	0	0	0	0	0	0	0	0	0	0	0	0	0	0	0	0	FALSE
134637	ADAT2	0	0	0	0	0	0	0	0	0	0	0	0	0	0	0	0	0	0	FALSE
113179	ADAT3	0	0	0	0	0	0	0	0	0	0	0	0	0	0	0	0	0	0	FALSE
57143	ADCK1	0	0	0	0	0	0	0	0	0	0	0	0	0	0	0	0	0	0	FALSE
90956	ADCK2	0	0	0	0	0	0	0	0	0	0	0	0	0	0	0	0	0	0	FALSE
203054	ADCK5	0	0	0	0	0	0	0	0	0	0	0	0	0	0	0	0	0	0	FALSE
107	ADCY1	0	0	0	0	0	0	0	0	0	0	0	0	0	0	0	0	0	0	FALSE
55811	ADCY10	0	0	0	0	0	0	0	0	0	0	0	0	0	0	0	0	0	0	FALSE
108	ADCY2	0	0	0	0	0	0	0	0	0	0	0	0	0	0	0	0	0	0	FALSE
109	ADCY3	0	0	0	0	0	0	0	0	0	0	0	0	0	0	0	0	0	0	FALSE
196883	ADCY4	0	0	0	0	0	0	0	0	0	0	0	0	0	0	0	0	0	0	FALSE
111	ADCY5	0	0	0	0	0	0	0	0	0	0	0	0	0	0	0	0	0	0	FALSE
112	ADCY6	0	0	0	0	0	0	0	0	0	0	0	0	0	0	0	0	0	0	FALSE
113	ADCY7	0	0	0	0	0	0	0	0	0	0	0	0	0	0	0	0	0	0	FALSE
114	ADCY8	0	0	0	0	0	0	0	0	0	0	0	0	0	0	0	0	0	0	FALSE
115	ADCY9	0	0	0	0	0	0	0	0	0	0	0	0	0	0	0	0	0	0	FALSE
116	ADCYAP1	0	0	0	0	0	0	0	0	0	0	0	0	0	0	0	0	0	0	FALSE
117	ADCYAP1R1	0	0	0	0	0	0	0	0	0	0	0	0	0	0	0	0	0	0	FALSE
118	ADD1	0	0	0	0	0	0	0	0	0	0	0	0	0	0	0	0	0	0	FALSE
119	ADD2	0	0	0	0	0	0	0	0	0	0	0	0	0	0	0	0	0	0	FALSE
120	ADD3	0	0	0	0	0	0	0	0	0	0	0	0	0	0	0	0	0	0	FALSE
84435	ADGRA1	0	0	0	0	0	0	0	0	0	0	0	0	0	0	0	0	0	0	FALSE
25960	ADGRA2	0	0	0	0	0	0	0	0	0	0	0	0	0	0	0	0	0	0	FALSE
166647	ADGRA3	0	0	0	0	0	0	0	0	0	0	0	0	0	0	0	0	0	0	FALSE
575	ADGRB1	0	0	0	0	0	0	0	0	0	0	0	0	0	0	0	0	0	0	FALSE
576	ADGRB2	0	0	0	0	0	0	0	0	0	0	0	0	0	0	0	0	0	0	FALSE
577	ADGRB3	0	0	0	0	0	0	0	0	0	0	0	0	0	0	0	0	0	0	FALSE
283383	ADGRD1	0	0	0	0	0	0	0	0	0	0	0	0	0	0	0	0	0	0	FALSE
2015	ADGRE1	0	0	0	0	0	0	0	0	0	0	0	0	0	0	0	0	0	0	FALSE
30817	ADGRE2	0	0	0	0	0	0	0	0	0	0	0	0	0	0	0	0	0	0	FALSE
84658	ADGRE3	0	0	0	0	0	0	0	0	0	0	0	0	0	0	0	0	0	0	FALSE
976	ADGRE5	0	0	0	0	0	0	0	0	0	0	0	0	0	0	0	0	0	0	FALSE
266977	ADGRF1	0	0	0	0	0	0	0	0	0	0	0	0	0	0	0	0	0	0	FALSE
165082	ADGRF3	0	0	0	0	0	0	0	0	0	0	0	0	0	0	0	0	0	0	FALSE
221393	ADGRF4	0	0	0	0	0	0	0	0	0	0	0	0	0	0	0	0	0	0	FALSE
221395	ADGRF5	0	0	0	0	0	0	0	0	0	0	0	0	0	0	0	0	0	0	FALSE
9289	ADGRG1	0	0	0	0	0	0	0	0	0	0	0	0	0	0	0	0	0	0	FALSE
10149	ADGRG2	0	0	0	0	0	0	0	0	0	0	0	0	0	0	0	0	0	0	FALSE
222487	ADGRG3	0	0	0	0	0	0	0	0	0	0	0	0	0	0	0	0	0	0	FALSE
139378	ADGRG4	0	0	0	0	0	0	0	0	0	0	0	0	0	0	0	0	0	0	FALSE
221188	ADGRG5	0	0	0	0	0	0	0	0	0	0	0	0	0	0	0	0	0	0	FALSE
57211	ADGRG6	0	0	0	0	0	0	0	0	0	0	0	0	0	0	0	0	0	0	FALSE
84873	ADGRG7	0	0	0	0	0	0	0	0	0	0	0	0	0	0	0	0	0	0	FALSE
22859	ADGRL1	0	0	0	0	0	0	0	0	0	0	0	0	0	0	0	0	0	0	FALSE
23266	ADGRL2	0	0	0	0	0	0	0	0	0	0	0	0	0	0	0	0	0	0	FALSE
23284	ADGRL3	0	0	0	0	0	0	0	0	0	0	0	0	0	0	0	0	0	0	FALSE
64123	ADGRL4	0	0	0	0	0	0	0	0	0	0	0	0	0	0	0	0	0	0	FALSE
84059	ADGRV1	0	0	0	0	0	0	0	0	0	0	0	0	0	0	0	0	0	0	FALSE
124	ADH1A	0	0	0	0	0	0	0	0	0	0	0	0	0	0	0	0	0	0	FALSE
125	ADH1B	0	0	0	0	0	0	0	0	0	0	0	0	0	0	0	0	0	0	FALSE
127	ADH4	0	0	0	0	0	0	0	0	0	0	0	0	0	0	0	0	0	0	FALSE
128	ADH5	0	0	0	0	0	0	0	0	0	0	0	0	0	0	0	0	0	0	FALSE
130	ADH6	0	0	0	0	0	0	0	0	0	0	0	0	0	0	0	0	0	0	FALSE
137872	ADHFE1	0	0	0	0	0	0	0	0	0	0	0	0	0	0	0	0	0	0	FALSE
55256	ADI1	0	0	0	0	0	0	0	0	0	0	0	0	0	0	0	0	0	0	FALSE
149685	ADIG	0	0	0	0	0	0	0	0	0	0	0	0	0	0	0	0	0	0	FALSE
9370	ADIPOQ	0	0	0	0	0	0	0	0	0	0	0	0	0	0	0	0	0	0	FALSE
51094	ADIPOR1	0	0	0	0	0	0	0	0	0	0	0	0	0	0	0	0	0	0	FALSE
79602	ADIPOR2	0	0	0	0	0	0	0	0	0	0	0	0	0	0	0	0	0	0	FALSE
10974	ADIRF	0	0	0	0	0	0	0	0	0	0	0	0	0	0	0	0	0	0	FALSE
132	ADK	0	0	0	0	0	0	0	0	0	0	0	0	0	0	0	0	0	0	FALSE
133	ADM	0	0	0	0	0	0	0	0	0	0	0	0	0	0	0	0	0	0	FALSE
79924	ADM2	0	0	0	0	0	0	0	0	0	0	0	0	0	0	0	0	0	0	FALSE
23394	ADNP	0	0	0	0	0	0	0	0	0	0	0	0	0	0	0	0	0	0	FALSE
22850	ADNP2	0	0	0	0	0	0	0	0	0	0	0	0	0	0	0	0	0	0	FALSE
134	ADORA1	0	0	0	0	0	0	0	0	0	0	0	0	0	0	0	0	0	0	FALSE
135	ADORA2A	0	0	0	0	0	0	0	0	0	0	0	0	0	0	0	0	0	0	FALSE
136	ADORA2B	0	0	0	0	0	0	0	0	0	0	0	0	0	0	0	0	0	0	FALSE
83440	ADPGK	0	0	0	0	0	0	0	0	0	0	0	0	0	0	0	0	0	0	FALSE
141	ADPRH	0	0	0	0	0	0	0	0	0	0	0	0	0	0	0	0	0	0	FALSE
113622	ADPRHL1	0	0	0	0	0	0	0	0	0	0	0	0	0	0	0	0	0	0	FALSE
54936	ADPRHL2	0	0	0	0	0	0	0	0	0	0	0	0	0	0	0	0	0	0	FALSE
56985	ADPRM	0	0	0	0	0	0	0	0	0	0	0	0	0	0	0	0	0	0	FALSE
148	ADRA1A	0	0	0	0	0	0	0	0	0	0	0	0	0	0	0	0	0	0	FALSE
147	ADRA1B	0	0	0	0	0	0	0	0	0	0	0	0	0	0	0	0	0	0	FALSE
146	ADRA1D	0	0	0	0	0	0	0	0	0	0	0	0	0	0	0	0	0	0	FALSE
150	ADRA2A	0	0	0	0	0	0	0	0	0	0	0	0	0	0	0	0	0	0	FALSE
151	ADRA2B	0	0	0	0	0	0	0	0	0	0	0	0	0	0	0	0	0	0	FALSE
152	ADRA2C	0	0	0	0	0	0	0	0	0	0	0	0	0	0	0	0	0	0	FALSE
153	ADRB1	0	0	0	0	0	0	0	0	0	0	0	0	0	0	0	0	0	0	FALSE
154	ADRB2	0	0	0	0	0	0	0	0	0	0	0	0	0	0	0	0	0	0	FALSE
155	ADRB3	0	0	0	0	0	0	0	0	0	0	0	0	0	0	0	0	0	0	FALSE
11047	ADRM1	0	0	0	0	0	0	0	0	0	0	0	0	0	0	0	0	0	0	FALSE
158	ADSL	0	1	0	1	0	1	0	1	0	1	1	0	1	1	0	1	0	9	FALSE
159	ADSS	0	0	0	0	0	0	0	0	0	0	0	0	0	0	0	0	0	0	FALSE
122622	ADSSL1	0	0	0	0	0	0	0	0	0	0	0	0	0	0	0	0	0	0	FALSE
84830	ADTRP	0	0	0	0	0	0	0	0	0	0	0	0	0	0	0	0	0	0	FALSE
165	AEBP1	0	0	0	0	0	0	0	0	0	0	0	0	0	0	0	0	0	0	FALSE
121536	AEBP2	0	0	0	0	0	0	0	0	0	0	0	0	0	0	0	0	0	0	FALSE
64782	AEN	0	0	0	0	0	0	0	0	0	0	0	0	0	0	0	0	0	0	FALSE
166	TLE5	0	0	0	0	0	0	0	0	0	0	0	0	0	0	0	0	0	0	FALSE
60312	AFAP1	0	0	0	0	0	0	0	0	0	0	0	0	0	0	0	0	0	0	FALSE
4301	AFDN	0	0	0	0	0	0	0	0	0	0	0	0	0	0	0	0	0	0	FALSE
4299	AFF1	0	0	0	0	0	0	0	0	0	0	0	0	0	0	0	0	0	0	FALSE
2334	AFF2	0	0	0	0	0	0	0	0	0	0	0	0	0	0	0	0	0	0	FALSE
3899	AFF3	0	0	0	0	0	0	0	0	0	0	0	0	0	0	0	0	0	0	FALSE
27125	AFF4	0	0	0	0	0	0	0	0	0	0	0	0	0	0	0	0	0	0	FALSE
246269	AFG1L	0	0	0	0	0	0	0	0	0	0	0	0	0	0	0	0	0	0	FALSE
10939	AFG3L2	1	1	1	1	1	1	1	1	1	1	1	1	1	1	1	1	1	17	TRUE
173	AFM	0	0	0	0	0	0	0	0	0	0	0	0	0	0	0	0	0	0	FALSE
125061	AFMID	0	0	0	0	0	0	0	0	0	0	0	0	0	0	0	0	0	0	FALSE
174	AFP	0	0	0	0	0	0	0	0	0	0	0	0	0	0	0	0	0	0	FALSE
54812	AFTPH	0	0	0	0	0	0	0	0	0	0	0	0	0	0	0	0	0	0	FALSE
175	AGA	0	0	0	0	0	0	0	0	0	0	0	0	0	0	0	0	0	0	FALSE
116987	AGAP1	0	0	0	0	0	0	0	0	0	0	0	0	0	0	0	0	0	0	FALSE
116986	AGAP2	0	0	0	0	0	0	0	0	0	0	0	0	0	0	0	0	0	0	FALSE
116988	AGAP3	0	0	0	0	0	0	0	0	0	0	0	0	0	0	0	0	0	0	FALSE
119016	AGAP4	0	0	0	0	0	0	0	0	0	0	0	0	0	0	0	0	0	0	FALSE
729092	AGAP5	0	0	0	0	0	0	0	0	0	0	0	0	0	0	0	0	0	0	FALSE
414189	AGAP6	0	0	0	0	0	0	0	0	0	0	0	0	0	0	0	0	0	0	FALSE
642517	AGAP9	0	0	0	0	0	0	0	0	0	0	0	0	0	0	0	0	0	0	FALSE
79841	AGBL2	0	0	0	0	0	0	0	0	0	0	0	0	0	0	0	0	0	0	FALSE
340351	AGBL3	0	0	0	0	0	0	0	0	0	0	0	0	0	0	0	0	0	0	FALSE
60509	AGBL5	0	0	0	0	0	0	0	0	0	0	0	0	0	0	0	0	0	0	FALSE
177	AGER	0	0	0	0	0	0	0	0	0	0	0	0	0	0	0	0	0	0	FALSE
3267	AGFG1	0	0	0	0	0	0	0	0	0	0	0	0	0	0	0	0	0	0	FALSE
3268	AGFG2	0	0	0	0	0	0	0	0	0	0	0	0	0	0	0	0	0	0	FALSE
55109	AGGF1	0	0	0	0	0	0	0	0	0	0	0	0	0	0	0	0	0	0	FALSE
55750	AGK	0	0	0	0	0	0	0	0	0	0	0	0	0	0	0	0	0	0	FALSE
178	AGL	0	0	0	0	0	0	0	0	0	0	0	0	0	0	0	0	0	0	FALSE
79814	AGMAT	0	0	0	0	0	0	0	0	0	0	0	0	0	0	0	0	0	0	FALSE
392636	AGMO	0	0	0	0	0	0	0	0	0	0	0	0	0	0	0	0	0	0	FALSE
26523	AGO1	0	0	0	0	0	0	0	0	0	0	0	0	0	0	0	0	0	0	FALSE
27161	AGO2	0	0	0	0	0	0	0	0	0	0	0	0	0	0	0	0	0	0	FALSE
192669	AGO3	0	0	0	0	0	0	0	0	0	0	0	0	0	0	0	0	0	0	FALSE
192670	AGO4	0	0	0	0	0	0	0	0	0	0	0	0	0	0	0	0	0	0	FALSE
10554	AGPAT1	0	0	0	0	0	0	0	0	0	0	0	0	0	0	0	0	0	0	FALSE
10555	AGPAT2	0	0	0	0	0	0	0	0	0	0	0	0	0	0	0	0	0	0	FALSE
56894	AGPAT3	0	0	0	0	0	0	0	0	0	0	0	0	0	0	0	0	0	0	FALSE
56895	AGPAT4	0	0	0	0	0	0	0	0	0	0	0	0	0	0	0	0	0	0	FALSE
55326	AGPAT5	0	0	0	0	0	0	0	0	0	0	0	0	0	0	0	0	0	0	FALSE
8540	AGPS	0	0	0	0	0	0	0	0	0	0	0	0	0	0	0	0	0	0	FALSE
10551	AGR2	0	0	0	0	0	0	0	0	0	0	0	0	0	0	0	0	0	0	FALSE
155465	AGR3	0	0	0	0	0	0	0	0	0	0	0	0	0	0	0	0	0	0	FALSE
375790	AGRN	0	0	0	0	0	0	0	0	0	0	0	0	0	0	0	0	0	0	FALSE
181	AGRP	0	0	0	0	0	0	0	0	0	0	0	0	0	0	0	0	0	0	FALSE
183	AGT	0	0	0	0	0	0	0	0	0	0	0	0	0	0	0	0	0	0	FALSE
23287	AGTPBP1	0	0	0	0	0	0	0	0	0	0	0	0	0	0	0	0	0	0	FALSE
185	AGTR1	0	0	0	0	0	0	0	0	0	0	0	0	0	0	0	0	0	0	FALSE
186	AGTR2	0	0	0	0	0	0	0	0	0	0	0	0	0	0	0	0	0	0	FALSE
57085	AGTRAP	0	0	0	0	0	0	0	0	0	0	0	0	0	0	0	0	0	0	FALSE
189	AGXT	0	0	0	0	0	0	0	0	0	0	0	0	0	0	0	0	0	0	FALSE
64902	AGXT2	0	0	0	0	0	0	0	0	0	0	0	0	0	0	0	0	0	0	FALSE
25909	AHCTF1	1	1	1	1	1	1	1	1	1	1	1	1	1	1	1	1	1	17	TRUE
191	AHCY	0	1	0	0	0	0	0	1	0	1	1	0	1	1	0	0	1	7	FALSE
10768	AHCYL1	0	0	0	0	0	0	0	0	0	0	0	0	0	0	0	0	0	0	FALSE
23382	AHCYL2	0	0	0	0	0	0	0	0	0	0	0	0	0	0	0	0	0	0	FALSE
54806	AHI1	0	0	0	0	0	0	0	0	0	0	0	0	0	0	0	0	0	0	FALSE
79026	AHNAK	0	0	0	0	0	0	0	0	0	0	0	0	0	0	0	0	0	0	FALSE
196	AHR	0	0	0	0	0	0	0	0	0	0	0	0	0	0	0	0	0	0	FALSE
57491	AHRR	0	0	0	0	0	0	0	0	0	0	0	0	0	0	0	0	0	0	FALSE
10598	AHSA1	0	0	0	0	0	0	0	0	0	0	0	0	0	0	0	0	0	0	FALSE
197	AHSG	0	0	0	0	0	0	0	0	0	0	0	0	0	0	0	0	0	0	FALSE
51327	AHSP	0	0	0	0	0	0	0	0	0	0	0	0	0	0	0	0	0	0	FALSE
57379	AICDA	0	0	0	0	0	0	0	0	0	0	0	0	0	0	0	0	0	0	FALSE
64853	AIDA	0	0	0	0	0	0	0	0	0	0	0	0	0	0	0	0	0	0	FALSE
199	AIF1	0	0	0	0	0	0	0	0	0	0	0	0	0	0	0	0	0	0	FALSE
83543	AIF1L	0	0	0	0	0	0	0	0	0	0	0	0	0	0	0	0	0	0	FALSE
9131	AIFM1	1	1	0	1	0	1	1	0	0	1	0	0	0	0	1	0	0	7	FALSE
84883	AIFM2	0	0	0	0	0	0	0	0	0	0	0	0	0	0	0	0	0	0	FALSE
150209	AIFM3	0	0	0	0	0	0	0	0	0	0	0	0	0	0	0	0	0	0	FALSE
51390	AIG1	0	0	0	0	0	0	0	0	0	0	0	0	0	0	0	0	0	0	FALSE
9447	AIM2	0	0	0	0	0	0	0	0	0	0	0	0	0	0	0	0	0	0	FALSE
9255	AIMP1	0	0	0	0	0	0	0	0	0	0	0	0	0	0	0	0	0	0	FALSE
7965	AIMP2	0	0	0	0	0	0	0	0	0	0	0	0	0	0	0	0	0	0	FALSE
9049	AIP	0	0	0	0	0	0	0	0	0	0	0	0	0	0	0	0	0	0	FALSE
23746	AIPL1	0	0	0	0	0	0	0	0	0	0	0	0	0	0	0	0	0	0	FALSE
326	AIRE	0	0	0	0	0	0	0	0	0	0	0	0	0	0	0	0	0	0	FALSE
55966	AJAP1	0	0	0	0	0	0	0	0	0	0	0	0	0	0	0	0	0	0	FALSE
84962	AJUBA	0	0	0	0	0	0	0	0	0	0	0	0	0	0	0	0	0	0	FALSE
203	AK1	0	0	0	0	0	0	0	0	0	0	0	0	0	0	0	0	0	0	FALSE
204	AK2	0	0	0	0	0	0	0	0	0	0	0	0	0	0	0	0	0	0	FALSE
50808	AK3	0	0	0	0	0	0	0	0	0	0	0	0	0	0	0	0	0	0	FALSE
205	AK4	0	0	0	0	0	0	0	0	0	0	0	0	0	0	0	0	0	0	FALSE
26289	AK5	0	0	0	0	0	0	0	0	0	0	0	0	0	0	0	0	0	0	FALSE
122481	AK7	0	0	0	0	0	0	0	0	0	0	0	0	0	0	0	0	0	0	FALSE
158067	AK8	0	0	0	0	0	0	0	0	0	0	0	0	0	0	0	0	0	0	FALSE
221264	AK9	0	0	0	0	0	0	0	0	0	0	0	0	0	0	0	0	0	0	FALSE
8165	AKAP1	0	0	0	0	0	0	0	0	0	0	0	0	0	0	0	0	0	0	FALSE
11216	AKAP10	0	0	0	0	0	0	0	0	0	0	0	0	0	0	0	0	0	0	FALSE
11215	AKAP11	0	0	0	0	0	0	0	0	0	0	0	0	0	0	0	0	0	0	FALSE
9590	AKAP12	0	0	0	0	0	0	0	0	0	0	0	0	0	0	0	0	0	0	FALSE
11214	AKAP13	0	0	0	0	0	0	0	0	0	0	0	0	0	0	0	0	0	0	FALSE
158798	AKAP14	0	0	0	0	0	0	0	0	0	0	0	0	0	0	0	0	0	0	FALSE
8227	AKAP17A	0	0	0	0	0	0	0	0	0	0	0	0	0	0	0	0	0	0	FALSE
11217	AKAP2	0	0	0	0	0	0	0	0	0	0	0	0	0	0	0	0	0	0	FALSE
10566	AKAP3	0	0	0	0	0	0	0	0	0	0	0	0	0	0	0	0	0	0	FALSE
9495	AKAP5	0	0	0	0	0	0	0	0	0	0	0	0	0	0	0	0	0	0	FALSE
9472	AKAP6	0	0	0	0	0	0	0	0	0	0	0	0	0	0	0	0	0	0	FALSE
9465	AKAP7	0	0	0	0	0	0	0	0	0	0	0	0	0	0	0	0	0	0	FALSE
10270	AKAP8	0	0	0	0	0	0	0	0	0	0	0	0	0	0	0	0	0	0	FALSE
26993	AKAP8L	0	0	0	0	0	0	0	0	0	0	0	0	0	0	0	0	0	0	FALSE
10142	AKAP9	0	0	0	0	0	0	0	0	0	0	0	0	0	0	0	0	0	0	FALSE
56672	AKIP1	0	0	0	0	0	0	0	0	0	0	0	0	0	0	0	0	0	0	FALSE
79647	AKIRIN1	0	0	0	0	0	0	0	0	0	0	0	0	0	0	0	0	0	0	FALSE
80709	AKNA	0	0	0	0	0	0	0	0	0	0	0	0	0	0	0	0	0	0	FALSE
10327	AKR1A1	0	0	0	0	0	0	0	0	0	0	0	0	0	0	0	0	0	0	FALSE
231	AKR1B1	0	0	0	0	0	0	0	0	0	0	0	0	0	0	0	0	0	0	FALSE
57016	AKR1B10	0	0	0	0	0	0	0	0	0	0	0	0	0	0	0	0	0	0	FALSE
441282	AKR1B15	0	0	0	0	0	0	0	0	0	0	0	0	0	0	0	0	0	0	FALSE
1645	AKR1C1	0	0	0	0	0	0	0	0	0	0	0	0	0	0	0	0	0	0	FALSE
1646	AKR1C2	0	0	0	0	0	0	0	0	0	0	0	0	0	0	0	0	0	0	FALSE
8644	AKR1C3	0	0	0	0	0	0	0	0	0	0	0	0	0	0	0	0	0	0	FALSE
1109	AKR1C4	0	0	0	0	0	0	0	0	0	0	0	0	0	0	0	0	0	0	FALSE
6718	AKR1D1	0	0	0	0	0	0	0	0	0	0	0	0	0	0	0	0	0	0	FALSE
83592	AKR1E2	0	0	0	0	0	0	0	0	0	0	0	0	0	0	0	0	0	0	FALSE
8574	AKR7A2	0	0	0	0	0	0	0	0	0	0	0	0	0	0	0	0	0	0	FALSE
22977	AKR7A3	0	0	0	0	0	0	0	0	0	0	0	0	0	0	0	0	0	0	FALSE
246181	AKR7L	0	0	0	0	0	0	0	0	0	0	0	0	0	0	0	0	0	0	FALSE
207	AKT1	0	0	0	0	0	0	0	0	0	0	0	0	0	0	0	0	0	0	FALSE
84335	AKT1S1	0	0	0	0	0	0	0	0	0	0	0	0	0	0	0	0	0	0	FALSE
208	AKT2	0	0	0	0	0	0	0	0	0	0	0	0	0	0	0	0	0	0	FALSE
10000	AKT3	0	0	0	0	0	0	0	0	0	0	0	0	0	0	0	0	0	0	FALSE
64400	AKTIP	0	0	0	0	0	0	0	0	0	0	0	0	0	0	0	0	0	0	FALSE
210	ALAD	0	0	0	0	0	0	0	0	0	0	0	0	0	0	0	0	0	0	FALSE
211	ALAS1	0	0	0	0	0	0	0	0	0	0	0	0	0	0	0	0	0	0	FALSE
212	ALAS2	0	0	0	0	0	0	0	0	0	0	0	0	0	0	0	0	0	0	FALSE
213	ALB	0	0	0	0	0	0	0	0	0	0	0	0	0	0	0	0	0	0	FALSE
214	ALCAM	0	0	0	0	0	0	0	0	0	0	0	0	0	0	0	0	0	0	FALSE
126133	ALDH16A1	0	0	0	0	0	0	0	0	0	0	0	0	0	0	0	0	0	0	FALSE
5832	ALDH18A1	0	0	0	0	0	0	0	0	0	0	0	0	0	0	0	0	0	0	FALSE
216	ALDH1A1	0	0	0	0	0	0	0	0	0	0	0	0	0	0	0	0	0	0	FALSE
8854	ALDH1A2	0	0	0	0	0	0	0	0	0	0	0	0	0	0	0	0	0	0	FALSE
220	ALDH1A3	0	0	0	0	0	0	0	0	0	0	0	0	0	0	0	0	0	0	FALSE
219	ALDH1B1	0	0	0	0	0	0	0	0	0	0	0	0	0	0	0	0	0	0	FALSE
10840	ALDH1L1	0	0	0	0	0	0	0	0	0	0	0	0	0	0	0	0	0	0	FALSE
160428	ALDH1L2	0	0	0	0	0	0	0	0	0	0	0	0	0	0	0	0	0	0	FALSE
217	ALDH2	0	0	0	0	0	0	0	0	0	0	0	0	0	0	0	0	0	0	FALSE
218	ALDH3A1	0	0	0	0	0	0	0	0	0	0	0	0	0	0	0	0	0	0	FALSE
222	ALDH3B2	0	0	0	0	0	0	0	0	0	0	0	0	0	0	0	0	0	0	FALSE
8659	ALDH4A1	0	0	0	0	0	0	0	0	0	0	0	0	0	0	0	0	0	0	FALSE
7915	ALDH5A1	0	0	0	0	0	0	0	0	0	0	0	0	0	0	0	0	0	0	FALSE
501	ALDH7A1	0	0	0	0	0	0	0	0	0	0	0	0	0	0	0	0	0	0	FALSE
64577	ALDH8A1	0	0	0	0	0	0	0	0	0	0	0	0	0	0	0	0	0	0	FALSE
223	ALDH9A1	0	0	0	0	0	0	0	0	0	0	0	0	0	0	0	0	0	0	FALSE
226	ALDOA	1	1	1	1	1	1	1	1	1	1	1	1	1	1	1	1	1	17	TRUE
229	ALDOB	0	0	0	0	0	0	0	0	0	0	0	0	0	0	0	0	0	0	FALSE
230	ALDOC	0	0	0	0	0	0	0	0	0	0	0	0	0	0	0	0	0	0	FALSE
56052	ALG1	0	0	1	0	0	0	0	1	1	1	1	0	0	1	1	1	0	8	FALSE
84920	ALG10	0	0	0	0	0	0	0	0	0	0	0	0	0	0	0	0	0	0	FALSE
144245	ALG10B	0	0	0	0	0	0	0	0	0	0	0	0	0	0	0	0	0	0	FALSE
440138	ALG11	1	1	1	1	1	1	1	1	1	1	1	1	1	1	1	1	1	17	TRUE
79087	ALG12	0	0	0	0	0	0	0	0	0	0	0	0	0	0	0	0	0	0	FALSE
79868	ALG13	1	1	1	1	0	1	1	1	1	1	0	1	1	1	1	1	1	15	TRUE
200810	ALG1L	0	0	0	0	0	0	0	0	0	0	0	0	0	0	0	0	0	0	FALSE
85365	ALG2	1	1	1	1	1	1	1	1	1	1	1	1	1	1	1	1	1	17	TRUE
10195	ALG3	0	0	0	0	0	0	0	0	0	0	0	0	0	0	0	0	0	0	FALSE
29880	ALG5	0	0	0	0	0	0	0	0	0	0	0	0	0	0	0	0	0	0	FALSE
29929	ALG6	0	0	0	0	0	0	0	0	0	0	0	0	0	0	0	0	0	0	FALSE
79053	ALG8	0	0	0	0	0	0	0	0	0	0	0	0	0	0	0	0	0	0	FALSE
79796	ALG9	0	0	0	0	0	0	0	0	0	0	0	0	0	0	0	0	0	0	FALSE
238	ALK	0	0	0	0	0	0	0	0	0	0	0	0	0	0	0	0	0	0	FALSE
389658	ALKAL1	0	0	0	0	0	0	0	0	0	0	0	0	0	0	0	0	0	0	FALSE
8846	ALKBH1	0	0	0	0	0	0	0	0	0	0	0	0	0	0	0	0	0	0	FALSE
121642	ALKBH2	0	0	0	0	0	0	0	0	0	0	0	0	0	0	0	0	0	0	FALSE
221120	ALKBH3	0	0	0	0	0	0	0	0	0	0	0	0	0	0	0	0	0	0	FALSE
54784	ALKBH4	0	0	0	0	0	0	0	0	0	0	0	0	0	0	0	0	0	0	FALSE
54890	ALKBH5	0	0	0	0	0	0	0	0	0	0	0	0	0	0	0	0	0	0	FALSE
84266	ALKBH7	0	0	0	0	0	0	0	0	0	0	0	0	0	0	0	0	0	0	FALSE
91801	ALKBH8	0	0	0	0	0	0	0	0	0	0	0	0	0	0	0	0	0	0	FALSE
55821	ALLC	0	0	0	0	0	0	0	0	0	0	0	0	0	0	0	0	0	0	FALSE
7840	ALMS1	0	0	0	0	0	0	0	0	0	0	0	0	0	0	0	0	0	0	FALSE
239	ALOX12	0	0	0	0	0	0	0	0	0	0	0	0	0	0	0	0	0	0	FALSE
242	ALOX12B	0	0	0	0	0	0	0	0	0	0	0	0	0	0	0	0	0	0	FALSE
246	ALOX15	0	0	0	0	0	0	0	0	0	0	0	0	0	0	0	0	0	0	FALSE
247	ALOX15B	0	0	0	0	0	0	0	0	0	0	0	0	0	0	0	0	0	0	FALSE
240	ALOX5	0	0	0	0	0	0	0	0	0	0	0	0	0	0	0	0	0	0	FALSE
241	ALOX5AP	0	0	0	0	0	0	0	0	0	0	0	0	0	0	0	0	0	0	FALSE
59344	ALOXE3	0	0	0	0	0	0	0	0	0	0	0	0	0	0	0	0	0	0	FALSE
251	ALPG	0	0	0	0	0	0	0	0	0	0	0	0	0	0	0	0	0	0	FALSE
248	ALPI	0	0	0	0	0	0	0	0	0	0	0	0	0	0	0	0	0	0	FALSE
80216	ALPK1	0	0	0	0	0	0	0	0	0	0	0	0	0	0	0	0	0	0	FALSE
115701	ALPK2	0	0	0	0	0	0	0	0	0	0	0	0	0	0	0	0	0	0	FALSE
57538	ALPK3	0	0	0	0	0	0	0	0	0	0	0	0	0	0	0	0	0	0	FALSE
249	ALPL	0	0	0	0	0	0	0	0	0	0	0	0	0	0	0	0	0	0	FALSE
250	ALPP	0	0	0	0	0	0	0	0	0	0	0	0	0	0	0	0	0	0	FALSE
57679	ALS2	0	0	0	0	0	0	0	0	0	0	0	0	0	0	0	0	0	0	FALSE
259173	ALS2CL	0	0	0	0	0	0	0	0	0	0	0	0	0	0	0	0	0	0	FALSE
130540	FLACC1	0	0	0	0	0	0	0	0	0	0	0	0	0	0	0	0	0	0	FALSE
8092	ALX1	0	0	0	0	0	0	0	0	0	0	0	0	0	0	0	0	0	0	FALSE
257	ALX3	0	0	0	0	0	0	0	0	0	0	0	0	0	0	0	0	0	0	FALSE
60529	ALX4	0	0	0	0	0	0	0	0	0	0	0	0	0	0	0	0	0	0	FALSE
10189	ALYREF	1	1	1	1	1	1	1	1	1	1	1	1	1	1	1	1	1	17	TRUE
23600	AMACR	0	0	0	0	0	0	0	0	0	0	0	0	0	0	0	0	0	0	FALSE
258	AMBN	0	0	0	0	0	0	0	0	0	0	0	0	0	0	0	0	0	0	FALSE
259	AMBP	0	0	0	0	0	0	0	0	0	0	0	0	0	0	0	0	0	0	FALSE
55626	AMBRA1	0	0	0	0	0	0	0	0	0	0	0	0	0	0	0	0	0	0	FALSE
262	AMD1	0	0	0	0	0	0	0	0	0	0	0	0	0	0	0	0	0	0	FALSE
144193	AMDHD1	0	0	0	0	0	0	0	0	0	0	0	0	0	0	0	0	0	0	FALSE
51005	AMDHD2	0	0	0	0	0	0	0	0	0	0	0	0	0	0	0	0	0	0	FALSE
265	AMELX	0	0	0	0	0	0	0	0	0	0	0	0	0	0	0	0	0	0	FALSE
139285	AMER1	0	0	0	0	0	0	0	0	0	0	0	0	0	0	0	0	0	0	FALSE
205147	AMER3	0	0	0	0	0	0	0	0	0	0	0	0	0	0	0	0	0	0	FALSE
267	AMFR	0	0	0	0	0	0	0	0	0	0	0	0	0	0	0	0	0	0	FALSE
268	AMH	0	0	0	0	0	0	0	0	0	0	0	0	0	0	0	0	0	0	FALSE
269	AMHR2	0	0	0	0	0	0	0	0	0	0	0	0	0	0	0	0	0	0	FALSE
57463	AMIGO1	0	0	0	0	0	0	0	0	0	0	0	0	0	0	0	0	0	0	FALSE
347902	AMIGO2	0	0	0	0	0	0	0	0	0	0	0	0	0	0	0	0	0	0	FALSE
386724	AMIGO3	0	0	0	0	0	0	0	0	0	0	0	0	0	0	0	0	0	0	FALSE
9949	AMMECR1	0	0	0	0	0	0	0	0	0	0	0	0	0	0	0	0	0	0	FALSE
81693	AMN	0	0	0	0	0	0	0	0	0	0	0	0	0	0	0	0	0	0	FALSE
196394	AMN1	0	0	0	0	0	0	0	0	0	0	0	0	0	0	0	0	0	0	FALSE
154796	AMOT	0	0	0	0	0	0	0	0	0	0	0	0	0	0	0	0	0	0	FALSE
154810	AMOTL1	0	0	0	0	0	0	0	0	0	0	0	0	0	0	0	0	0	0	FALSE
51421	AMOTL2	0	0	0	0	0	0	0	0	0	0	0	0	0	0	0	0	0	0	FALSE
270	AMPD1	0	0	0	0	0	0	0	0	0	0	0	0	0	0	0	0	0	0	FALSE
271	AMPD2	0	0	0	0	0	0	0	0	0	0	0	0	0	0	0	0	0	0	FALSE
272	AMPD3	0	0	0	0	0	0	0	0	0	0	0	0	0	0	0	0	0	0	FALSE
273	AMPH	0	0	0	0	0	0	0	0	0	0	0	0	0	0	0	0	0	0	FALSE
275	AMT	0	0	0	0	0	0	0	0	0	0	0	0	0	0	0	0	0	0	FALSE
401138	AMTN	0	0	0	0	0	0	0	0	0	0	0	0	0	0	0	0	0	0	FALSE
279	AMY2A	0	0	0	0	0	0	0	0	0	0	0	0	0	0	0	0	0	0	FALSE
280	AMY2B	0	0	0	0	0	0	0	0	0	0	0	0	0	0	0	0	0	0	FALSE
155185	AMZ1	0	0	0	0	0	0	0	0	0	0	0	0	0	0	0	0	0	0	FALSE
51321	AMZ2	0	0	0	0	0	0	0	0	0	0	0	0	0	0	0	0	0	0	FALSE
64682	ANAPC1	1	1	1	1	1	1	1	1	1	1	1	1	1	1	1	1	1	17	TRUE
10393	ANAPC10	0	0	0	0	0	0	0	0	0	0	0	0	0	0	0	0	0	0	FALSE
51529	ANAPC11	1	1	1	1	1	1	1	1	1	1	1	1	1	1	1	1	1	17	TRUE
25906	ANAPC15	1	1	0	0	0	0	1	0	0	1	0	1	0	0	0	0	0	5	FALSE
29882	ANAPC2	1	1	1	1	1	1	1	1	1	1	1	1	1	1	1	1	1	17	TRUE
29945	ANAPC4	1	1	1	1	1	1	1	1	1	1	1	1	1	1	1	1	1	17	TRUE
51433	ANAPC5	1	1	1	1	1	1	1	1	1	1	1	1	1	1	1	1	1	17	TRUE
51434	ANAPC7	0	0	0	0	0	0	0	0	0	0	0	0	0	0	0	0	0	0	FALSE
283	ANG	0	0	0	0	0	0	0	0	0	0	0	0	0	0	0	0	0	0	FALSE
23357	ANGEL1	0	0	0	0	0	0	0	0	0	0	0	0	0	0	0	0	0	0	FALSE
90806	ANGEL2	0	0	0	0	0	0	0	0	0	0	0	0	0	0	0	0	0	0	FALSE
285	ANGPT2	0	0	0	0	0	0	0	0	0	0	0	0	0	0	0	0	0	0	FALSE
51378	ANGPT4	0	0	0	0	0	0	0	0	0	0	0	0	0	0	0	0	0	0	FALSE
9068	ANGPTL1	0	0	0	0	0	0	0	0	0	0	0	0	0	0	0	0	0	0	FALSE
23452	ANGPTL2	0	0	0	0	0	0	0	0	0	0	0	0	0	0	0	0	0	0	FALSE
51129	ANGPTL4	0	0	0	0	0	0	0	0	0	0	0	0	0	0	0	0	0	0	FALSE
253935	ANGPTL5	0	0	0	0	0	0	0	0	0	0	0	0	0	0	0	0	0	0	FALSE
83854	ANGPTL6	0	0	0	0	0	0	0	0	0	0	0	0	0	0	0	0	0	0	FALSE
10218	ANGPTL7	0	0	0	0	0	0	0	0	0	0	0	0	0	0	0	0	0	0	FALSE
55908	ANGPTL8	0	0	0	0	0	0	0	0	0	0	0	0	0	0	0	0	0	0	FALSE
286	ANK1	0	0	0	0	0	0	0	0	0	0	0	0	0	0	0	0	0	0	FALSE
287	ANK2	0	0	0	0	0	0	0	0	0	0	0	0	0	0	0	0	0	0	FALSE
288	ANK3	0	0	0	0	0	0	0	0	0	0	0	0	0	0	0	0	0	0	FALSE
150709	ANKAR	0	0	0	0	0	0	0	0	0	0	0	0	0	0	0	0	0	0	FALSE
63926	ANKEF1	0	0	0	0	0	0	0	0	0	0	0	0	0	0	0	0	0	0	FALSE
162282	ANKFN1	0	0	0	0	0	0	0	0	0	0	0	0	0	0	0	0	0	0	FALSE
51479	ANKFY1	0	0	0	0	0	0	0	0	0	0	0	0	0	0	0	0	0	0	FALSE
56172	ANKH	0	0	0	0	0	0	0	0	0	0	0	0	0	0	0	0	0	0	FALSE
54882	ANKHD1	0	0	0	0	0	0	0	0	0	0	0	0	0	0	0	0	0	0	FALSE
54467	ANKIB1	0	0	0	0	0	0	0	0	0	0	0	0	0	0	0	0	0	0	FALSE
255239	ANKK1	0	0	0	0	0	0	0	0	0	0	0	0	0	0	0	0	0	0	FALSE
126549	ANKLE1	0	0	0	0	0	0	0	0	0	0	0	0	0	0	0	0	0	0	FALSE
23141	ANKLE2	1	1	1	1	1	1	1	1	1	1	1	1	1	1	1	1	1	17	TRUE
51281	ANKMY1	0	0	0	0	0	0	0	0	0	0	0	0	0	0	0	0	0	0	FALSE
57037	ANKMY2	0	0	0	0	0	0	0	0	0	0	0	0	0	0	0	0	0	0	FALSE
57763	ANKRA2	0	0	0	0	0	0	0	0	0	0	0	0	0	0	0	0	0	0	FALSE
27063	ANKRD1	0	0	0	0	0	0	0	0	0	0	0	0	0	0	0	0	0	0	FALSE
55608	ANKRD10	0	0	0	0	0	0	0	0	0	0	0	0	0	0	0	0	0	0	FALSE
29123	ANKRD11	0	0	0	0	0	0	0	0	0	0	0	0	0	0	0	0	0	0	FALSE
23253	ANKRD12	0	0	0	0	0	0	0	0	0	0	0	0	0	0	0	0	0	0	FALSE
88455	ANKRD13A	0	0	0	0	0	0	0	0	0	0	0	0	0	0	0	0	0	0	FALSE
124930	ANKRD13B	0	0	0	0	0	0	0	0	0	0	0	0	0	0	0	0	0	0	FALSE
81573	ANKRD13C	0	0	0	0	0	0	0	0	0	0	0	0	0	0	0	0	0	0	FALSE
338692	ANKRD13D	0	0	0	0	0	0	0	0	0	0	0	0	0	0	0	0	0	0	FALSE
54522	ANKRD16	0	0	0	0	0	0	0	0	0	0	0	0	0	0	0	0	0	0	FALSE
26057	ANKRD17	0	1	0	0	0	0	0	0	0	1	0	0	0	0	0	0	0	2	FALSE
253650	ANKRD18A	0	0	0	0	0	0	0	0	0	0	0	0	0	0	0	0	0	0	FALSE
26287	ANKRD2	0	0	0	0	0	0	0	0	0	0	0	0	0	0	0	0	0	0	FALSE
118932	ANKRD22	0	0	0	0	0	0	0	0	0	0	0	0	0	0	0	0	0	0	FALSE
200539	ANKRD23	0	0	0	0	0	0	0	0	0	0	0	0	0	0	0	0	0	0	FALSE
170961	ANKRD24	0	0	0	0	0	0	0	0	0	0	0	0	0	0	0	0	0	0	FALSE
22852	ANKRD26	0	0	0	0	0	0	0	0	0	0	0	0	0	0	0	0	0	0	FALSE
84079	ANKRD27	0	0	0	0	0	0	0	0	0	0	0	0	0	0	0	0	0	0	FALSE
23243	ANKRD28	0	0	0	0	0	0	0	0	0	0	0	0	0	0	0	0	0	0	FALSE
147463	ANKRD29	0	0	0	0	0	0	0	0	0	0	0	0	0	0	0	0	0	0	FALSE
91074	ANKRD30A	0	0	0	0	0	0	0	0	0	0	0	0	0	0	0	0	0	0	FALSE
374860	ANKRD30B	0	0	0	0	0	0	0	0	0	0	0	0	0	0	0	0	0	0	FALSE
256006	ANKRD31	0	0	0	0	0	0	0	0	0	0	0	0	0	0	0	0	0	0	FALSE
341405	ANKRD33	0	0	0	0	0	0	0	0	0	0	0	0	0	0	0	0	0	0	FALSE
651746	ANKRD33B	0	0	0	0	0	0	0	0	0	0	0	0	0	0	0	0	0	0	FALSE
340120	ANKRD34B	0	0	0	0	0	0	0	0	0	0	0	0	0	0	0	0	0	0	FALSE
390616	ANKRD34C	0	0	0	0	0	0	0	0	0	0	0	0	0	0	0	0	0	0	FALSE
148741	ANKRD35	0	0	0	0	0	0	0	0	0	0	0	0	0	0	0	0	0	0	FALSE
57730	ANKRD36B	0	0	1	0	0	0	0	0	0	1	0	1	0	0	1	0	0	4	FALSE
353322	ANKRD37	0	0	0	0	0	0	0	0	0	0	0	0	0	0	0	0	0	0	FALSE
91369	ANKRD40	0	0	0	0	0	0	0	0	0	0	0	0	0	0	0	0	0	0	FALSE
338699	ANKRD42	0	0	0	0	0	0	0	0	0	0	0	0	0	0	0	0	0	0	FALSE
91526	ANKRD44	0	0	0	0	0	0	0	0	0	0	0	0	0	0	0	0	0	0	FALSE
339416	ANKRD45	0	0	0	0	0	0	0	0	0	0	0	0	0	0	0	0	0	0	FALSE
157567	ANKRD46	0	0	0	0	0	0	0	0	0	0	0	0	0	0	0	0	0	0	FALSE
54851	ANKRD49	0	0	0	0	0	0	0	0	0	0	0	0	0	0	0	0	0	0	FALSE
57182	ANKRD50	0	0	0	0	0	0	0	0	0	0	0	0	0	0	0	0	0	0	FALSE
79998	ANKRD53	0	0	0	0	0	0	0	0	0	0	0	0	0	0	0	0	0	0	FALSE
22881	ANKRD6	0	0	0	0	0	0	0	0	0	0	0	0	0	0	0	0	0	0	FALSE
342850	ANKRD62	0	0	0	0	0	0	0	0	0	0	0	0	0	0	0	0	0	0	FALSE
441869	ANKRD65	0	0	0	0	0	0	0	0	0	0	0	0	0	0	0	0	0	0	FALSE
100287718	ANKRD66	0	0	0	0	0	0	0	0	0	0	0	0	0	0	0	0	0	0	FALSE
56311	ANKRD7	0	0	0	0	0	0	0	0	0	0	0	0	0	0	0	0	0	0	FALSE
23294	ANKS1A	0	0	0	0	0	0	0	0	0	0	0	0	0	0	0	0	0	0	FALSE
124401	ANKS3	0	0	0	0	0	0	0	0	0	0	0	0	0	0	0	0	0	0	FALSE
257629	ANKS4B	0	0	0	0	0	0	0	0	0	0	0	0	0	0	0	0	0	0	FALSE
203286	ANKS6	0	0	0	0	0	0	0	0	0	0	0	0	0	0	0	0	0	0	FALSE
55139	ANKZF1	0	0	0	0	0	0	0	0	0	0	0	0	0	0	0	0	0	0	FALSE
54443	ANLN	0	0	0	0	0	0	0	0	0	0	0	0	0	0	1	0	0	1	FALSE
55107	ANO1	0	0	0	0	0	0	0	0	0	0	0	0	0	0	0	0	0	0	FALSE
55129	ANO10	0	0	0	0	0	0	0	0	0	0	0	0	0	0	0	0	0	0	FALSE
57101	ANO2	0	0	0	0	0	0	0	0	0	0	0	0	0	0	0	0	0	0	FALSE
63982	ANO3	0	0	0	0	0	0	0	0	0	0	0	0	0	0	0	0	0	0	FALSE
203859	ANO5	0	0	0	0	0	0	0	0	0	0	0	0	0	0	0	0	0	0	FALSE
196527	ANO6	0	0	0	0	0	0	0	0	0	0	0	0	0	0	0	0	0	0	FALSE
57719	ANO8	0	0	0	0	0	0	0	0	0	0	0	0	0	0	0	0	0	0	FALSE
3730	ANOS1	0	0	0	0	0	0	0	0	0	0	0	0	0	0	0	0	0	0	FALSE
8125	ANP32A	0	0	0	0	0	0	0	0	0	0	0	0	0	0	0	0	0	0	FALSE
10541	ANP32B	0	0	0	0	0	0	0	0	0	0	0	0	0	0	0	0	0	0	FALSE
23519	ANP32D	0	0	0	0	0	0	0	0	0	0	0	0	0	0	0	0	0	0	FALSE
81611	ANP32E	0	0	0	0	0	0	0	0	0	0	0	0	0	0	0	0	0	0	FALSE
290	ANPEP	0	0	0	0	0	0	0	0	0	0	0	0	0	0	0	0	0	0	FALSE
84168	ANTXR1	0	0	0	0	0	0	0	0	0	0	0	0	0	0	0	0	0	0	FALSE
118429	ANTXR2	0	0	0	0	0	0	0	0	0	0	0	0	0	0	0	0	0	0	FALSE
195977	ANTXRL	0	0	0	0	0	0	0	0	0	0	0	0	0	0	0	0	0	0	FALSE
301	ANXA1	0	0	0	0	0	0	0	0	0	0	0	0	0	0	0	0	0	0	FALSE
11199	ANXA10	0	0	0	0	0	0	0	0	0	0	0	0	0	0	0	0	0	0	FALSE
311	ANXA11	0	0	0	0	0	0	0	0	0	0	0	0	0	0	0	0	0	0	FALSE
312	ANXA13	0	0	0	0	0	0	0	0	0	0	0	0	0	0	0	0	0	0	FALSE
302	ANXA2	0	0	0	0	0	0	0	0	0	0	0	0	0	0	0	0	0	0	FALSE
306	ANXA3	0	0	0	0	0	0	0	0	0	0	0	0	0	0	0	0	0	0	FALSE
307	ANXA4	0	0	0	0	0	0	0	0	0	0	0	0	0	0	0	0	0	0	FALSE
308	ANXA5	0	0	0	0	0	0	0	0	0	0	0	0	0	0	0	0	0	0	FALSE
309	ANXA6	0	0	0	0	0	0	0	0	0	0	0	0	0	0	0	0	0	0	FALSE
310	ANXA7	0	0	0	0	0	0	0	0	0	0	0	0	0	0	0	0	0	0	FALSE
8416	ANXA9	0	0	0	0	0	0	0	0	0	0	0	0	0	0	0	0	0	0	FALSE
313	AOAH	0	0	0	0	0	0	0	0	0	0	0	0	0	0	0	0	0	0	FALSE
26	AOC1	0	0	0	0	0	0	0	0	0	0	0	0	0	0	0	0	0	0	FALSE
314	AOC2	0	0	0	0	0	0	0	0	0	0	0	0	0	0	0	0	0	0	FALSE
8639	AOC3	0	0	0	0	0	0	0	0	0	0	0	0	0	0	0	0	0	0	FALSE
316	AOX1	0	0	0	0	0	0	0	0	0	0	0	0	0	0	0	0	0	0	FALSE
55435	AP1AR	0	0	0	0	0	0	0	0	0	0	0	0	0	0	0	0	0	0	FALSE
162	AP1B1	0	0	0	0	0	0	0	0	0	0	0	0	0	0	0	0	0	0	FALSE
164	AP1G1	0	0	0	0	0	0	0	0	0	0	0	0	0	0	0	0	0	0	FALSE
8906	AP1G2	0	0	0	0	0	0	0	0	0	0	0	0	0	0	0	0	0	0	FALSE
8907	AP1M1	0	0	0	0	0	0	0	0	0	0	0	0	0	0	0	0	0	0	FALSE
10053	AP1M2	0	0	0	0	0	0	0	0	0	0	0	0	0	0	0	0	0	0	FALSE
1174	AP1S1	0	0	0	0	0	0	0	0	0	0	0	0	0	0	0	0	0	0	FALSE
8905	AP1S2	0	0	0	0	0	0	0	0	0	0	0	0	0	0	0	0	0	0	FALSE
130340	AP1S3	0	0	0	0	0	0	0	0	0	0	0	0	0	0	0	0	0	0	FALSE
160	AP2A1	0	0	0	0	0	0	0	0	0	0	0	0	0	0	0	0	0	0	FALSE
161	AP2A2	0	0	0	0	0	0	0	0	0	0	0	0	0	0	0	0	0	0	FALSE
163	AP2B1	0	0	0	0	0	0	0	0	0	0	0	0	0	0	0	0	0	0	FALSE
1173	AP2M1	1	1	1	1	1	1	1	1	1	1	1	1	1	1	1	0	0	15	TRUE
1175	AP2S1	0	1	1	1	0	1	0	1	0	1	1	1	1	1	1	0	0	11	FALSE
8546	AP3B1	0	0	0	0	0	0	0	0	0	0	0	0	0	0	0	0	0	0	FALSE
8943	AP3D1	0	0	0	0	0	0	0	0	0	0	0	0	0	0	0	0	0	0	FALSE
26985	AP3M1	0	0	0	0	0	0	0	0	0	0	0	0	0	0	0	0	0	0	FALSE
10947	AP3M2	0	0	0	0	0	0	0	0	0	0	0	0	0	0	0	0	0	0	FALSE
1176	AP3S1	0	0	0	0	0	0	0	0	0	0	0	0	0	0	0	0	0	0	FALSE
10239	AP3S2	0	0	0	0	0	0	0	0	0	0	0	0	0	0	0	0	0	0	FALSE
10717	AP4B1	0	0	0	0	0	0	0	0	0	0	0	0	0	0	0	0	0	0	FALSE
23431	AP4E1	0	0	0	0	0	0	0	0	0	0	0	0	0	0	0	0	0	0	FALSE
9179	AP4M1	0	0	0	0	0	0	0	0	0	0	0	0	0	0	0	0	0	0	FALSE
11154	AP4S1	0	0	0	0	0	0	0	0	0	0	0	0	0	0	0	0	0	0	FALSE
55745	AP5M1	0	0	0	0	0	0	0	0	0	0	0	0	0	0	0	0	0	0	FALSE
317	APAF1	0	0	0	0	0	0	0	0	0	0	0	0	0	0	0	0	0	0	FALSE
320	APBA1	0	0	0	0	0	0	0	0	0	0	0	0	0	0	0	0	0	0	FALSE
321	APBA2	0	0	0	0	0	0	0	0	0	0	0	0	0	0	0	0	0	0	FALSE
9546	APBA3	0	0	0	0	0	0	0	0	0	0	0	0	0	0	0	0	0	0	FALSE
322	APBB1	0	0	0	0	0	0	0	0	0	0	0	0	0	0	0	0	0	0	FALSE
54518	APBB1IP	0	0	0	0	0	0	0	0	0	0	0	0	0	0	0	0	0	0	FALSE
323	APBB2	0	0	0	0	0	0	0	0	0	0	0	0	0	0	0	0	0	0	FALSE
10307	APBB3	0	0	0	0	0	0	0	0	0	0	0	0	0	0	0	0	0	0	FALSE
324	APC	0	0	0	0	0	0	0	0	0	0	0	0	0	0	0	0	0	0	FALSE
10297	APC2	0	0	0	0	0	0	0	0	0	0	0	0	0	0	0	0	0	0	FALSE
147495	APCDD1	0	0	0	0	0	0	0	0	0	0	0	0	0	0	0	0	0	0	FALSE
164284	APCDD1L	0	0	0	0	0	0	0	0	0	0	0	0	0	0	0	0	0	0	FALSE
325	APCS	0	0	0	0	0	0	0	0	0	0	0	0	0	0	0	0	0	0	FALSE
327	APEH	0	0	0	0	0	0	0	0	0	0	0	0	0	0	0	0	0	0	FALSE
328	APEX1	0	0	0	0	0	0	0	0	0	0	0	0	0	0	0	0	0	0	FALSE
27301	APEX2	0	0	0	0	0	0	0	0	0	0	0	0	0	0	0	0	0	0	FALSE
51107	APH1A	0	0	0	0	0	0	0	0	0	0	0	0	0	0	0	0	0	0	FALSE
83464	APH1B	0	0	0	0	0	0	0	0	0	0	0	0	0	0	0	0	0	0	FALSE
8539	API5	0	0	0	0	0	0	0	0	0	0	0	0	0	0	0	0	0	0	FALSE
51074	APIP	0	0	0	0	0	0	0	0	0	0	0	0	0	0	0	0	0	0	FALSE
200558	APLF	0	0	0	0	0	0	0	0	0	0	0	0	0	0	0	0	0	0	FALSE
8862	APLN	0	0	0	0	0	0	0	0	0	0	0	0	0	0	0	0	0	0	FALSE
187	APLNR	0	0	0	0	0	0	0	0	0	0	0	0	0	0	0	0	0	0	FALSE
333	APLP1	0	0	0	0	0	0	0	0	0	0	0	0	0	0	0	0	0	0	FALSE
334	APLP2	0	0	0	0	0	0	0	0	0	0	0	0	0	0	0	0	0	0	FALSE
57136	APMAP	0	0	0	0	0	0	0	0	0	0	0	0	0	0	0	0	0	0	FALSE
335	APOA1	0	0	0	0	0	0	0	0	0	0	0	0	0	0	0	0	0	0	FALSE
336	APOA2	0	0	0	0	0	0	0	0	0	0	0	0	0	0	0	0	0	0	FALSE
337	APOA4	0	0	0	0	0	0	0	0	0	0	0	0	0	0	0	0	0	0	FALSE
116519	APOA5	0	0	0	0	0	0	0	0	0	0	0	0	0	0	0	0	0	0	FALSE
338	APOB	0	0	0	0	0	0	0	0	0	0	0	0	0	0	0	0	0	0	FALSE
339	APOBEC1	0	0	0	0	0	0	0	0	0	0	0	0	0	0	0	0	0	0	FALSE
10930	APOBEC2	0	0	0	0	0	0	0	0	0	0	0	0	0	0	0	0	0	0	FALSE
200315	APOBEC3A	0	0	0	0	0	0	0	0	0	0	0	0	0	0	0	0	0	0	FALSE
9582	APOBEC3B	0	0	0	0	0	0	0	0	0	0	0	0	0	0	0	0	0	0	FALSE
27350	APOBEC3C	0	0	0	0	0	0	0	0	0	0	0	0	0	0	0	0	0	0	FALSE
140564	APOBEC3D	0	0	0	0	0	0	0	0	0	0	0	0	0	0	0	0	0	0	FALSE
200316	APOBEC3F	0	0	0	0	0	0	0	0	0	0	0	0	0	0	0	0	0	0	FALSE
60489	APOBEC3G	0	0	0	0	0	0	0	0	0	0	0	0	0	0	0	0	0	0	FALSE
164668	APOBEC3H	0	0	0	0	0	0	0	0	0	0	0	0	0	0	0	0	0	0	FALSE
403314	APOBEC4	0	0	0	0	0	0	0	0	0	0	0	0	0	0	0	0	0	0	FALSE
55911	APOBR	0	0	0	0	0	0	0	0	0	0	0	0	0	0	0	0	0	0	FALSE
341	APOC1	0	0	0	0	0	0	0	0	0	0	0	0	0	0	0	0	0	0	FALSE
344	APOC2	0	0	0	0	0	0	0	0	0	0	0	0	0	0	0	0	0	0	FALSE
345	APOC3	0	0	0	0	0	0	0	0	0	0	0	0	0	0	0	0	0	0	FALSE
346	APOC4	0	0	0	0	0	0	0	0	0	0	0	0	0	0	0	0	0	0	FALSE
347	APOD	0	0	0	0	0	0	0	0	0	0	0	0	0	0	0	0	0	0	FALSE
348	APOE	0	0	0	0	0	0	0	0	0	0	0	0	0	0	0	0	0	0	FALSE
319	APOF	0	0	0	0	0	0	0	0	0	0	0	0	0	0	0	0	0	0	FALSE
350	APOH	0	0	0	0	0	0	0	0	0	0	0	0	0	0	0	0	0	0	FALSE
8542	APOL1	0	0	0	0	0	0	0	0	0	0	0	0	0	0	0	0	0	0	FALSE
23780	APOL2	0	0	0	0	0	0	0	0	0	0	0	0	0	0	0	0	0	0	FALSE
80833	APOL3	0	0	0	0	0	0	0	0	0	0	0	0	0	0	0	0	0	0	FALSE
80831	APOL5	0	0	0	0	0	0	0	0	0	0	0	0	0	0	0	0	0	0	FALSE
80830	APOL6	0	0	0	0	0	0	0	0	0	0	0	0	0	0	0	0	0	0	FALSE
81575	APOLD1	0	0	0	0	0	0	0	0	0	0	0	0	0	0	0	0	0	0	FALSE
55937	APOM	0	0	0	0	0	0	0	0	0	0	0	0	0	0	0	0	0	0	FALSE
79135	APOO	0	0	0	0	0	0	0	0	0	0	0	0	0	0	0	0	0	0	FALSE
139322	APOOL	0	0	0	0	0	0	0	0	0	0	0	0	0	0	0	0	0	0	FALSE
84334	COA8	0	0	0	0	0	0	0	0	0	0	0	0	0	0	0	0	0	0	FALSE
351	APP	0	0	0	0	0	0	0	0	0	0	0	0	0	0	0	0	0	0	FALSE
10513	APPBP2	0	0	0	0	0	0	0	0	0	0	0	0	0	0	0	0	0	0	FALSE
26060	APPL1	0	0	0	0	0	0	0	0	0	0	0	0	0	0	0	0	0	0	FALSE
55198	APPL2	0	0	0	0	0	0	0	0	0	0	0	0	0	0	0	0	0	0	FALSE
353	APRT	0	0	0	0	0	0	0	0	0	0	0	0	0	0	0	0	0	0	FALSE
54840	APTX	0	0	0	0	0	0	0	0	0	0	0	0	0	0	0	0	0	0	FALSE
358	AQP1	0	0	0	0	0	0	0	0	0	0	0	0	0	0	0	0	0	0	FALSE
89872	AQP10	0	0	0	0	0	0	0	0	0	0	0	0	0	0	0	0	0	0	FALSE
282679	AQP11	0	0	0	0	0	0	0	0	0	0	0	0	0	0	0	0	0	0	FALSE
653437	AQP12B	0	0	0	0	0	0	0	0	0	0	0	0	0	0	0	0	0	0	FALSE
359	AQP2	0	0	0	0	0	0	0	0	0	0	0	0	0	0	0	0	0	0	FALSE
360	AQP3	0	0	0	0	0	0	0	0	0	0	0	0	0	0	0	0	0	0	FALSE
361	AQP4	0	0	0	0	0	0	0	0	0	0	0	0	0	0	0	0	0	0	FALSE
362	AQP5	0	0	0	0	0	0	0	0	0	0	0	0	0	0	0	0	0	0	FALSE
363	AQP6	0	0	0	0	0	0	0	0	0	0	0	0	0	0	0	0	0	0	FALSE
364	AQP7	0	1	1	0	0	0	1	0	1	1	0	1	0	1	0	0	1	8	FALSE
343	AQP8	0	0	0	0	0	0	0	0	0	0	0	0	0	0	0	0	0	0	FALSE
366	AQP9	0	0	0	0	0	0	0	0	0	0	0	0	0	0	0	0	0	0	FALSE
9716	AQR	1	1	1	1	1	1	1	1	1	1	1	1	1	1	1	1	1	17	TRUE
367	AR	0	0	0	0	0	0	0	0	0	0	0	0	0	0	0	0	0	0	FALSE
369	ARAF	0	0	0	0	0	0	0	0	0	0	0	0	0	0	0	0	0	0	FALSE
116985	ARAP1	0	0	0	0	0	0	0	0	0	0	0	0	0	0	0	0	0	0	FALSE
116984	ARAP2	0	0	0	0	0	0	0	0	0	0	0	0	0	0	0	0	0	0	FALSE
64411	ARAP3	0	0	0	0	0	0	0	0	0	0	0	0	0	0	0	0	0	0	FALSE
23237	ARC	0	0	0	0	0	0	0	0	0	0	0	0	0	0	0	0	0	0	FALSE
372	ARCN1	1	1	1	1	1	1	1	1	1	1	1	1	1	1	1	1	1	17	TRUE
374	AREG	0	0	0	0	0	0	0	0	0	0	0	0	0	0	0	0	0	0	FALSE
9870	AREL1	0	0	0	0	0	0	0	0	0	0	0	0	0	0	0	0	0	0	FALSE
375	ARF1	0	0	0	0	0	0	0	0	0	0	0	0	0	0	0	0	0	0	FALSE
377	ARF3	0	0	0	0	0	0	0	0	0	0	0	0	0	0	0	0	0	0	FALSE
378	ARF4	0	0	0	0	0	0	0	0	0	0	0	0	0	0	0	0	0	0	FALSE
381	ARF5	0	0	0	0	0	0	0	0	0	0	0	0	0	0	0	0	0	0	FALSE
382	ARF6	0	0	0	0	0	0	0	0	0	0	0	0	0	0	0	0	0	0	FALSE
55738	ARFGAP1	0	0	0	0	0	0	0	0	0	0	0	0	0	0	0	0	0	0	FALSE
84364	ARFGAP2	0	0	0	0	0	0	0	0	0	0	0	0	0	0	0	0	0	0	FALSE
26286	ARFGAP3	0	0	0	0	0	0	0	0	0	0	0	0	0	0	0	0	0	0	FALSE
10565	ARFGEF1	0	0	0	0	0	0	0	0	0	0	0	0	0	0	0	0	0	0	FALSE
57221	ARFGEF3	0	0	0	0	0	0	0	0	0	0	0	0	0	0	0	0	0	0	FALSE
27236	ARFIP1	0	0	0	0	0	0	0	0	0	0	0	0	0	0	0	0	0	0	FALSE
23647	ARFIP2	0	0	0	0	0	0	0	0	0	0	0	0	0	0	0	0	0	0	FALSE
10139	ARFRP1	0	0	1	0	0	0	0	0	0	1	0	0	0	0	0	0	0	2	FALSE
383	ARG1	0	0	0	0	0	0	0	0	0	0	0	0	0	0	0	0	0	0	FALSE
384	ARG2	0	0	0	0	0	0	0	0	0	0	0	0	0	0	0	0	0	0	FALSE
503582	ARGFX	0	0	0	0	0	0	0	0	0	0	0	0	0	0	0	0	0	0	FALSE
55082	ARGLU1	0	1	1	1	0	1	1	1	0	1	0	1	1	1	1	0	1	12	FALSE
392	ARHGAP1	0	0	0	0	0	0	0	0	0	0	0	0	0	0	0	0	0	0	FALSE
79658	ARHGAP10	0	0	0	0	0	0	0	0	0	0	0	0	0	0	0	0	0	0	FALSE
9824	ARHGAP11A	0	0	0	0	0	0	0	0	0	0	0	0	0	0	0	0	0	0	FALSE
89839	ARHGAP11B	0	0	0	0	0	0	0	0	0	0	0	0	0	0	0	0	0	0	FALSE
94134	ARHGAP12	0	0	0	0	0	0	0	0	0	0	0	0	0	0	0	0	0	0	FALSE
55843	ARHGAP15	0	0	0	0	0	0	0	0	0	0	0	0	0	0	0	0	0	0	FALSE
55114	ARHGAP17	0	0	0	0	0	0	0	0	0	0	0	0	0	0	0	0	0	0	FALSE
93663	ARHGAP18	0	0	0	0	0	0	0	0	0	0	0	0	0	0	0	0	0	0	FALSE
84986	ARHGAP19	0	0	0	0	0	0	0	0	0	0	0	0	0	0	0	0	0	0	FALSE
57569	ARHGAP20	0	0	0	0	0	0	0	0	0	0	0	0	0	0	0	0	0	0	FALSE
57584	ARHGAP21	0	0	0	0	0	0	0	0	0	0	0	0	0	0	0	0	0	0	FALSE
58504	ARHGAP22	0	0	0	0	0	0	0	0	0	0	0	0	0	0	0	0	0	0	FALSE
57636	ARHGAP23	0	0	0	0	0	0	0	0	0	0	0	0	0	0	0	0	0	0	FALSE
83478	ARHGAP24	0	0	0	0	0	0	0	0	0	0	0	0	0	0	0	0	0	0	FALSE
9938	ARHGAP25	0	0	0	0	0	0	0	0	0	0	0	0	0	0	0	0	0	0	FALSE
23092	ARHGAP26	0	0	0	0	0	0	0	0	0	0	0	0	0	0	0	0	0	0	FALSE
201176	ARHGAP27	0	0	0	0	0	0	0	0	0	0	0	0	0	0	0	0	0	0	FALSE
79822	ARHGAP28	0	0	0	0	0	0	0	0	0	0	0	0	0	0	0	0	0	0	FALSE
9411	ARHGAP29	0	0	0	0	0	0	0	0	0	0	0	0	0	0	0	0	0	0	FALSE
257106	ARHGAP30	0	0	0	0	0	0	0	0	0	0	0	0	0	0	0	0	0	0	FALSE
57514	ARHGAP31	0	0	0	0	0	0	0	0	0	0	0	0	0	0	0	0	0	0	FALSE
9743	ARHGAP32	0	0	0	0	0	0	0	0	0	0	0	0	0	0	0	0	0	0	FALSE
115703	ARHGAP33	0	0	0	0	0	0	0	0	0	0	0	0	0	0	0	0	0	0	FALSE
2909	ARHGAP35	0	0	0	0	0	0	0	0	0	0	0	0	0	0	0	0	0	0	FALSE
158763	ARHGAP36	0	0	0	0	0	0	0	0	0	0	0	0	0	0	0	0	0	0	FALSE
80728	ARHGAP39	0	0	0	0	0	0	0	0	0	0	0	0	0	0	0	0	0	0	FALSE
393	ARHGAP4	0	0	0	0	0	0	0	0	0	0	0	0	0	0	0	0	0	0	FALSE
9912	ARHGAP44	0	0	0	0	0	0	0	0	0	0	0	0	0	0	0	0	0	0	FALSE
23526	ARHGAP45	0	0	0	0	0	0	0	0	0	0	0	0	0	0	0	0	0	0	FALSE
394	ARHGAP5	0	0	0	0	0	0	0	0	0	0	0	0	0	0	0	0	0	0	FALSE
395	ARHGAP6	0	0	0	0	0	0	0	0	0	0	0	0	0	0	0	0	0	0	FALSE
23779	ARHGAP8	0	0	0	0	0	0	0	0	0	0	0	0	0	0	0	0	0	0	FALSE
64333	ARHGAP9	0	0	0	0	0	0	0	0	0	0	0	0	0	0	0	0	0	0	FALSE
396	ARHGDIA	0	0	0	0	0	0	0	0	0	0	0	0	0	0	0	0	0	0	FALSE
397	ARHGDIB	0	0	0	0	0	0	0	0	0	0	0	0	0	0	0	0	0	0	FALSE
398	ARHGDIG	0	0	0	0	0	0	0	0	0	0	0	0	0	0	0	0	0	0	FALSE
9138	ARHGEF1	0	0	0	0	0	0	0	0	0	0	0	0	0	0	0	0	0	0	FALSE
9639	ARHGEF10	0	0	0	0	0	0	0	0	0	0	0	0	0	0	0	0	0	0	FALSE
55160	ARHGEF10L	0	0	0	0	0	0	0	0	0	0	0	0	0	0	0	0	0	0	FALSE
9826	ARHGEF11	0	0	0	0	0	0	0	0	0	0	0	0	0	0	0	0	0	0	FALSE
23365	ARHGEF12	0	0	0	0	0	0	0	0	0	0	0	0	0	0	0	0	0	0	FALSE
22899	ARHGEF15	0	0	0	0	0	0	0	0	0	0	0	0	0	0	0	0	0	0	FALSE
27237	ARHGEF16	0	0	0	0	0	0	0	0	0	0	0	0	0	0	0	0	0	0	FALSE
23370	ARHGEF18	0	0	0	0	0	0	0	0	0	0	0	0	0	0	0	0	0	0	FALSE
128272	ARHGEF19	0	0	0	0	0	0	0	0	0	0	0	0	0	0	0	0	0	0	FALSE
9181	ARHGEF2	0	0	0	0	0	0	0	0	0	0	0	0	0	0	0	0	0	0	FALSE
115557	ARHGEF25	0	0	0	0	0	0	0	0	0	0	0	0	0	0	0	0	0	0	FALSE
26084	ARHGEF26	0	0	0	0	0	0	0	0	0	0	0	0	0	0	0	0	0	0	FALSE
64283	ARHGEF28	0	0	0	0	0	0	0	0	0	0	0	0	0	0	0	0	0	0	FALSE
50650	ARHGEF3	0	0	0	0	0	0	0	0	0	0	0	0	0	0	0	0	0	0	FALSE
100271715	ARHGEF33	0	0	0	0	0	0	0	0	0	0	0	0	0	0	0	0	0	0	FALSE
445328	ARHGEF35	0	0	0	0	0	0	0	0	0	0	0	0	0	0	0	0	0	0	FALSE
389337	ARHGEF37	0	0	0	0	0	0	0	0	0	0	0	0	0	0	0	0	0	0	FALSE
54848	ARHGEF38	0	0	0	0	0	0	0	0	0	0	0	0	0	0	0	0	0	0	FALSE
84904	ARHGEF39	0	0	0	0	0	0	0	0	0	0	0	0	0	0	0	0	0	0	FALSE
50649	ARHGEF4	0	0	0	0	0	0	0	0	0	0	0	0	0	0	0	0	0	0	FALSE
55701	ARHGEF40	0	0	0	0	0	0	0	0	0	0	0	0	0	0	0	0	0	0	FALSE
7984	ARHGEF5	0	0	0	0	0	0	0	0	0	0	0	0	0	0	0	0	0	0	FALSE
9459	ARHGEF6	0	0	0	0	0	0	0	0	0	0	0	0	0	0	0	0	0	0	FALSE
8874	ARHGEF7	0	0	0	0	0	0	0	0	0	0	0	0	0	0	0	0	0	0	FALSE
23229	ARHGEF9	0	0	0	0	0	0	0	0	0	0	0	0	0	0	0	0	0	0	FALSE
8289	ARID1A	0	0	0	0	0	0	0	0	0	0	0	0	0	0	0	0	0	0	FALSE
57492	ARID1B	0	0	0	0	0	0	0	0	0	0	0	0	0	0	0	0	0	0	FALSE
196528	ARID2	0	0	0	0	0	0	0	0	0	0	0	0	0	0	0	0	0	0	FALSE
1820	ARID3A	0	0	0	0	0	0	0	0	0	0	0	0	0	0	0	0	0	0	FALSE
10620	ARID3B	0	0	0	0	0	0	0	0	0	0	0	0	0	0	0	0	0	0	FALSE
138715	ARID3C	0	0	0	0	0	0	0	0	0	0	0	0	0	0	0	0	0	0	FALSE
5926	ARID4A	0	0	0	0	0	0	0	0	0	0	0	0	0	0	0	0	0	0	FALSE
51742	ARID4B	0	0	0	0	0	0	0	0	0	0	0	0	0	0	0	0	0	0	FALSE
10865	ARID5A	0	0	0	0	0	0	0	0	0	0	0	0	0	0	0	0	0	0	FALSE
84159	ARID5B	0	0	0	0	0	0	0	0	0	0	0	0	0	0	0	0	0	0	FALSE
25820	ARIH1	1	1	1	1	1	1	1	1	1	1	1	1	1	1	1	1	1	17	TRUE
10425	ARIH2	0	0	0	0	0	0	0	0	0	0	0	0	0	0	0	0	0	0	FALSE
400	ARL1	0	0	0	0	0	0	0	0	0	0	0	0	0	0	0	0	0	0	FALSE
285598	ARL10	0	0	0	0	0	0	0	0	0	0	0	0	0	0	0	0	0	0	FALSE
115761	ARL11	0	0	0	0	0	0	0	0	0	0	0	0	0	0	0	0	0	0	FALSE
392509	ARL13A	0	0	0	0	0	0	0	0	0	0	0	0	0	0	0	0	0	0	FALSE
200894	ARL13B	0	0	0	0	0	0	0	0	0	0	0	0	0	0	0	0	0	0	FALSE
80117	ARL14	0	0	0	0	0	0	0	0	0	0	0	0	0	0	0	0	0	0	FALSE
120534	ARL14EP	0	0	0	0	0	0	0	0	0	0	0	0	0	0	0	0	0	0	FALSE
54622	ARL15	0	0	0	0	0	0	0	0	0	0	0	0	0	0	0	0	0	0	FALSE
339231	ARL16	0	0	0	0	0	0	0	0	0	0	0	0	0	0	0	0	0	0	FALSE
51326	ARL17A	0	0	0	0	0	0	0	0	0	0	0	0	0	0	0	0	0	0	FALSE
402	ARL2	1	1	1	1	1	1	1	1	1	1	1	1	1	1	1	1	1	17	TRUE
23568	ARL2BP	0	0	0	0	0	0	0	0	0	0	0	0	0	0	0	0	0	0	FALSE
403	ARL3	0	0	0	0	0	0	0	0	0	0	0	0	0	0	0	0	0	0	FALSE
10124	ARL4A	0	0	0	0	0	0	0	0	0	0	0	0	0	0	0	0	0	0	FALSE
10123	ARL4C	0	0	0	0	0	0	0	0	0	0	0	0	0	0	0	0	0	0	FALSE
379	ARL4D	0	0	0	0	0	0	0	0	0	0	0	0	0	0	0	0	0	0	FALSE
26225	ARL5A	0	0	0	0	0	0	0	0	0	0	0	0	0	0	0	0	0	0	FALSE
221079	ARL5B	0	0	0	0	0	0	0	0	0	0	0	0	0	0	0	0	0	0	FALSE
390790	ARL5C	0	0	0	0	0	0	0	0	0	0	0	0	0	0	0	0	0	0	FALSE
84100	ARL6	0	0	0	0	0	0	0	0	0	0	0	0	0	0	0	0	0	0	FALSE
23204	ARL6IP1	0	0	0	0	0	0	0	0	0	0	0	0	0	0	0	0	0	0	FALSE
51329	ARL6IP4	0	0	0	0	0	0	0	0	0	0	0	0	0	0	0	0	0	0	FALSE
10550	ARL6IP5	0	0	0	0	0	0	0	0	0	0	0	0	0	0	0	0	0	0	FALSE
127829	ARL8A	0	0	0	0	0	0	0	0	0	0	0	0	0	0	0	0	0	0	FALSE
55207	ARL8B	0	0	0	0	0	0	0	0	0	0	0	0	0	0	0	0	0	0	FALSE
132946	ARL9	0	0	0	0	0	0	0	0	0	0	0	0	0	0	0	0	0	0	FALSE
55156	ARMC1	0	0	0	0	0	0	0	0	0	0	0	0	0	0	0	0	0	0	FALSE
83787	ARMC10	0	0	0	0	0	0	0	0	0	0	0	0	0	0	0	0	0	0	FALSE
84071	ARMC2	0	0	0	0	0	0	0	0	0	0	0	0	0	0	0	0	0	0	FALSE
219681	ARMC3	0	0	0	0	0	0	0	0	0	0	0	0	0	0	0	0	0	0	FALSE
55130	ARMC4	0	0	0	0	0	0	0	0	0	0	0	0	0	0	0	0	0	0	FALSE
79798	ARMC5	0	0	0	0	0	0	0	0	0	0	0	0	0	0	0	0	0	0	FALSE
93436	ARMC6	0	0	0	0	0	0	0	0	0	0	0	0	0	0	0	0	0	0	FALSE
79637	ARMC7	1	1	1	1	1	1	1	1	1	1	1	1	1	1	1	1	1	17	TRUE
25852	ARMC8	0	0	0	0	0	0	0	0	0	0	0	0	0	0	0	0	0	0	FALSE
51309	ARMCX1	0	0	0	0	0	0	0	0	0	0	0	0	0	0	0	0	0	0	FALSE
9823	ARMCX2	0	0	0	0	0	0	0	0	0	0	0	0	0	0	0	0	0	0	FALSE
51566	ARMCX3	0	0	0	0	0	0	0	0	0	0	0	0	0	0	0	0	0	0	FALSE
64860	ARMCX5	0	0	0	0	0	0	0	0	0	0	0	0	0	0	0	0	0	0	FALSE
54470	ARMCX6	0	0	0	0	0	0	0	0	0	0	0	0	0	0	0	0	0	0	FALSE
339541	ARMH1	0	0	0	0	0	0	0	0	0	0	0	0	0	0	0	0	0	0	FALSE
79591	ARMH3	0	0	0	0	0	0	0	0	0	0	0	0	0	0	0	0	0	0	FALSE
145407	ARMH4	0	0	0	0	0	0	0	0	0	0	0	0	0	0	0	0	0	0	FALSE
405	ARNT	0	0	0	0	0	0	0	0	0	0	0	0	0	0	0	0	0	0	FALSE
9915	ARNT2	0	0	0	0	0	0	0	0	0	0	0	0	0	0	0	0	0	0	FALSE
406	ARNTL	0	0	0	0	0	0	0	0	0	0	0	0	0	0	0	0	0	0	FALSE
56938	ARNTL2	0	0	0	0	0	0	0	0	0	0	0	0	0	0	0	0	0	0	FALSE
10552	ARPC1A	0	0	0	0	0	0	0	0	0	0	0	0	0	0	0	0	0	0	FALSE
10095	ARPC1B	0	0	0	0	0	0	0	0	0	0	0	0	0	0	0	0	0	0	FALSE
10109	ARPC2	0	0	0	0	0	0	0	0	0	0	0	0	0	0	0	0	0	0	FALSE
10094	ARPC3	0	0	0	0	0	0	0	0	0	0	0	0	0	0	0	0	0	0	FALSE
10093	ARPC4	0	0	1	0	0	0	0	0	1	1	0	0	0	0	0	0	0	3	FALSE
10092	ARPC5	0	0	0	0	0	0	0	0	0	0	0	0	0	0	0	0	0	0	FALSE
81873	ARPC5L	0	0	0	0	0	0	0	0	0	0	0	0	0	0	0	0	0	0	FALSE
348110	ARPIN	0	0	0	0	0	0	0	0	0	0	0	0	0	0	0	0	0	0	FALSE
10776	ARPP19	0	0	0	0	0	0	0	0	0	0	0	0	0	0	0	0	0	0	FALSE
10777	ARPP21	0	0	0	0	0	0	0	0	0	0	0	0	0	0	0	0	0	0	FALSE
407	ARR3	0	0	0	0	0	0	0	0	0	0	0	0	0	0	0	0	0	0	FALSE
408	ARRB1	0	0	0	0	0	0	0	0	0	0	0	0	0	0	0	0	0	0	FALSE
409	ARRB2	0	0	0	0	0	0	0	0	0	0	0	0	0	0	0	0	0	0	FALSE
92714	ARRDC1	0	0	0	0	0	0	0	0	0	0	0	0	0	0	0	0	0	0	FALSE
27106	ARRDC2	0	0	0	0	0	0	0	0	0	0	0	0	0	0	0	0	0	0	FALSE
91947	ARRDC4	0	0	0	0	0	0	0	0	0	0	0	0	0	0	0	0	0	0	FALSE
410	ARSA	0	0	0	0	0	0	0	0	0	0	0	0	0	0	0	0	0	0	FALSE
411	ARSB	0	0	0	0	0	0	0	0	0	0	0	0	0	0	0	0	0	0	FALSE
414	ARSD	0	0	0	0	0	0	0	0	0	0	0	0	0	0	0	0	0	0	FALSE
415	ARSE	0	0	0	0	0	0	0	0	0	0	0	0	0	0	0	0	0	0	FALSE
416	ARSF	0	0	0	0	0	0	0	0	0	0	0	0	0	0	0	0	0	0	FALSE
22901	ARSG	0	0	0	0	0	0	0	0	0	0	0	0	0	0	0	0	0	0	FALSE
347527	ARSH	0	0	0	0	0	0	0	0	0	0	0	0	0	0	0	0	0	0	FALSE
340075	ARSI	0	0	0	0	0	0	0	0	0	0	0	0	0	0	0	0	0	0	FALSE
79642	ARSJ	0	0	0	0	0	0	0	0	0	0	0	0	0	0	0	0	0	0	FALSE
153642	ARSK	0	0	0	0	0	0	0	0	0	0	0	0	0	0	0	0	0	0	FALSE
417	ART1	0	0	0	0	0	0	0	0	0	0	0	0	0	0	0	0	0	0	FALSE
419	ART3	0	0	0	0	0	0	0	0	0	0	0	0	0	0	0	0	0	0	FALSE
420	ART4	0	0	0	0	0	0	0	0	0	0	0	0	0	0	0	0	0	0	FALSE
116969	ART5	0	0	0	0	0	0	0	0	0	0	0	0	0	0	0	0	0	0	FALSE
64801	ARV1	0	0	0	0	0	0	0	0	0	0	0	0	0	0	0	0	0	0	FALSE
421	ARVCF	0	0	0	0	0	0	0	0	0	0	0	0	0	0	0	0	0	0	FALSE
170302	ARX	0	0	0	0	0	0	0	0	0	0	0	0	0	0	0	0	0	0	FALSE
57412	AS3MT	0	0	0	0	0	0	0	0	0	0	0	0	0	0	0	0	0	0	FALSE
56624	ASAH2	0	0	0	0	0	0	0	0	0	0	0	0	0	0	0	0	0	0	FALSE
50807	ASAP1	0	0	0	0	0	0	0	0	0	0	0	0	0	0	0	0	0	0	FALSE
8853	ASAP2	0	0	0	0	0	0	0	0	0	0	0	0	0	0	0	0	0	0	FALSE
55616	ASAP3	0	0	0	0	0	0	0	0	0	0	0	0	0	0	0	0	0	0	FALSE
51665	ASB1	0	0	0	0	0	0	0	0	0	0	0	0	0	0	0	0	0	0	FALSE
136371	ASB10	0	0	0	0	0	0	0	0	0	0	0	0	0	0	0	0	0	0	FALSE
140456	ASB11	0	0	0	0	0	0	0	0	0	0	0	0	0	0	0	0	0	0	FALSE
142689	ASB12	0	0	0	0	0	0	0	0	0	0	0	0	0	0	0	0	0	0	FALSE
79754	ASB13	0	0	0	0	0	0	0	0	0	0	0	0	0	0	0	0	0	0	FALSE
142686	ASB14	0	0	0	0	0	0	0	0	0	0	0	0	0	0	0	0	0	0	FALSE
142685	ASB15	0	0	0	0	0	0	0	0	0	0	0	0	0	0	0	0	0	0	FALSE
92591	ASB16	0	0	0	0	0	0	0	0	0	0	0	0	0	0	0	0	0	0	FALSE
127247	ASB17	0	0	0	0	0	0	0	0	0	0	0	0	0	0	0	0	0	0	FALSE
401036	ASB18	0	0	0	0	0	0	0	0	0	0	0	0	0	0	0	0	0	0	FALSE
51130	ASB3	0	0	0	0	0	0	0	0	0	0	0	0	0	0	0	0	0	0	FALSE
51666	ASB4	0	0	0	0	0	0	0	0	0	0	0	0	0	0	0	0	0	0	FALSE
140458	ASB5	0	0	0	0	0	0	0	0	0	0	0	0	0	0	0	0	0	0	FALSE
140459	ASB6	0	0	0	0	0	0	0	0	0	0	0	0	0	0	0	0	0	0	FALSE
140460	ASB7	0	0	0	0	0	0	0	0	0	0	0	0	0	0	0	0	0	0	FALSE
140461	ASB8	0	0	0	0	0	0	0	0	0	0	0	0	0	0	0	0	0	0	FALSE
140462	ASB9	0	0	0	0	0	0	0	0	0	0	0	0	0	0	0	0	0	0	FALSE
51008	ASCC1	0	0	0	0	0	0	0	0	0	0	0	0	0	0	0	0	0	0	FALSE
84164	ASCC2	0	0	0	0	0	0	0	0	0	0	0	0	0	0	0	0	0	0	FALSE
10973	ASCC3	0	0	0	0	0	0	0	0	0	0	0	0	0	0	0	0	0	0	FALSE
429	ASCL1	0	0	0	0	0	0	0	0	0	0	0	0	0	0	0	0	0	0	FALSE
430	ASCL2	0	0	0	0	0	0	0	0	0	0	0	0	0	0	0	0	0	0	FALSE
56676	ASCL3	0	0	0	0	0	0	0	0	0	0	0	0	0	0	0	0	0	0	FALSE
121549	ASCL4	0	0	0	0	0	0	0	0	0	0	0	0	0	0	0	0	0	0	FALSE
25842	ASF1A	0	0	0	0	0	0	0	0	0	0	0	0	0	0	0	0	0	0	FALSE
55723	ASF1B	0	0	0	0	0	0	0	0	0	0	0	0	0	0	0	0	0	0	FALSE
432	ASGR1	0	0	0	0	0	0	0	0	0	0	0	0	0	0	0	0	0	0	FALSE
433	ASGR2	0	0	0	0	0	0	0	0	0	0	0	0	0	0	0	0	0	0	FALSE
55870	ASH1L	0	0	0	0	0	0	0	0	0	0	0	0	0	0	0	0	0	0	FALSE
9070	ASH2L	0	1	0	1	0	1	0	0	1	1	0	0	0	0	0	0	0	5	FALSE
41	ASIC1	0	0	0	0	0	0	0	0	0	0	0	0	0	0	0	0	0	0	FALSE
40	ASIC2	0	0	0	0	0	0	0	0	0	0	0	0	0	0	0	0	0	0	FALSE
51802	ASIC5	0	0	0	0	0	0	0	0	0	0	0	0	0	0	0	0	0	0	FALSE
434	ASIP	0	0	0	0	0	0	0	0	0	0	0	0	0	0	0	0	0	0	FALSE
435	ASL	0	0	0	0	0	0	0	0	0	0	0	0	0	0	0	0	0	0	FALSE
438	ASMT	0	0	0	0	0	0	0	0	0	0	0	0	0	0	0	0	0	0	FALSE
8623	ASMTL	0	0	0	0	0	0	0	0	0	0	0	0	0	0	0	0	0	0	FALSE
439	ASNA1	0	0	0	0	0	0	1	0	0	0	1	0	0	0	0	0	0	2	FALSE
440	ASNS	0	0	0	0	0	0	0	0	0	0	0	0	0	0	0	0	0	0	FALSE
54529	ASNSD1	0	0	0	0	0	0	0	0	0	0	0	0	0	0	0	0	0	0	FALSE
443	ASPA	0	0	0	0	0	0	0	0	0	0	0	0	0	0	0	0	0	0	FALSE
444	ASPH	0	0	0	0	0	0	0	0	0	0	0	0	0	0	0	0	0	0	FALSE
253982	ASPHD1	0	0	0	0	0	0	0	0	0	0	0	0	0	0	0	0	0	0	FALSE
57168	ASPHD2	0	0	0	0	0	0	0	0	0	0	0	0	0	0	0	0	0	0	FALSE
259266	ASPM	0	0	0	0	0	0	0	0	0	0	0	0	0	0	0	0	0	0	FALSE
151516	ASPRV1	0	0	0	0	0	0	0	0	0	0	0	0	0	0	0	0	0	0	FALSE
80150	ASRGL1	0	0	0	0	0	0	0	0	0	0	0	0	0	0	0	0	0	0	FALSE
445	ASS1	0	0	0	0	0	0	0	0	0	0	0	0	0	0	0	0	0	0	FALSE
28990	ASTE1	0	0	0	0	0	0	0	0	0	0	0	0	0	0	0	0	0	0	FALSE
431705	ASTL	0	0	0	0	0	0	0	0	0	0	0	0	0	0	0	0	0	0	FALSE
460	ASTN1	0	0	0	0	0	0	0	0	0	0	0	0	0	0	0	0	0	0	FALSE
23245	ASTN2	0	0	0	0	0	0	0	0	0	0	0	0	0	0	0	0	0	0	FALSE
171023	ASXL1	0	0	0	0	0	0	0	0	0	0	0	0	0	0	0	0	0	0	FALSE
80816	ASXL3	0	0	0	0	0	0	0	0	0	0	0	0	0	0	0	0	0	0	FALSE
136991	ASZ1	0	0	0	0	0	0	0	0	0	0	0	0	0	0	0	0	0	0	FALSE
84896	ATAD1	0	0	0	0	0	0	0	0	0	0	0	0	0	0	0	0	0	0	FALSE
29028	ATAD2	0	0	0	0	0	0	0	0	0	0	0	0	0	0	0	0	0	0	FALSE
54454	ATAD2B	0	0	0	0	0	0	0	0	0	0	0	0	0	0	0	0	0	0	FALSE
55210	ATAD3A	0	0	0	0	0	0	0	0	0	0	0	0	0	0	0	0	0	0	FALSE
83858	ATAD3B	0	0	0	0	0	0	0	0	0	0	0	0	0	0	0	0	0	0	FALSE
219293	ATAD3C	0	0	0	0	0	0	0	0	0	0	0	0	0	0	0	0	0	0	FALSE
79915	ATAD5	0	0	0	0	0	0	0	0	0	0	0	0	0	0	0	0	0	0	FALSE
79969	ATAT1	0	0	0	0	0	0	0	0	0	0	0	0	0	0	0	0	0	0	FALSE
85300	ATCAY	0	0	0	0	0	0	0	0	0	0	0	0	0	0	0	0	0	0	FALSE
466	ATF1	0	0	0	0	0	0	0	0	0	0	0	0	0	0	0	0	0	0	FALSE
1386	ATF2	0	0	0	0	0	0	0	0	0	0	0	0	0	0	0	0	0	0	FALSE
467	ATF3	0	0	0	0	0	0	0	0	0	0	0	0	0	0	0	0	0	0	FALSE
468	ATF4	0	1	1	1	0	0	0	0	0	1	0	0	0	0	0	0	1	5	FALSE
22926	ATF6	0	0	0	0	0	0	0	0	0	0	0	0	0	0	0	0	0	0	FALSE
1388	ATF6B	0	0	0	0	0	0	0	0	0	0	0	0	0	0	0	0	0	0	FALSE
11016	ATF7	0	0	0	0	0	0	0	0	0	0	0	0	0	0	0	0	0	0	FALSE
55729	ATF7IP	0	0	0	0	0	0	0	0	0	0	0	0	0	0	0	0	0	0	FALSE
80063	ATF7IP2	0	0	0	0	0	0	0	0	0	0	0	0	0	0	0	0	0	0	FALSE
83734	ATG10	0	0	0	0	0	0	0	0	0	0	0	0	0	0	0	0	0	0	FALSE
60673	ATG101	0	0	0	0	0	0	0	0	0	0	0	0	0	0	0	0	0	0	FALSE
9140	ATG12	0	0	0	0	0	0	0	0	0	0	0	0	0	0	0	0	0	0	FALSE
9776	ATG13	0	0	0	0	0	0	0	0	0	0	0	0	0	0	0	0	0	0	FALSE
22863	ATG14	0	0	0	0	0	0	0	0	0	0	0	0	0	0	0	0	0	0	FALSE
55054	ATG16L1	0	0	0	0	0	0	0	0	0	0	0	0	0	0	0	0	0	0	FALSE
89849	ATG16L2	0	0	0	0	0	0	0	0	0	0	0	0	0	0	0	0	0	0	FALSE
23130	ATG2A	0	0	0	0	0	0	0	0	0	0	0	0	0	0	0	0	0	0	FALSE
55102	ATG2B	0	0	0	0	0	0	0	0	0	0	0	0	0	0	0	0	0	0	FALSE
64422	ATG3	0	0	0	0	0	0	0	0	0	0	0	0	0	0	0	0	0	0	FALSE
115201	ATG4A	0	0	0	0	0	0	0	0	0	0	0	0	0	0	0	0	0	0	FALSE
23192	ATG4B	0	0	0	0	0	0	0	0	0	0	0	0	0	0	0	0	0	0	FALSE
84938	ATG4C	0	0	0	0	0	0	0	0	0	0	0	0	0	0	0	0	0	0	FALSE
84971	ATG4D	0	0	0	0	0	0	0	0	0	0	0	0	0	0	0	0	0	0	FALSE
9474	ATG5	0	0	0	0	0	0	0	0	0	0	0	0	0	0	0	0	0	0	FALSE
10533	ATG7	0	0	0	0	0	0	0	0	0	0	0	0	0	0	0	0	0	0	FALSE
79065	ATG9A	0	0	0	0	0	0	0	0	0	0	0	0	0	0	0	0	0	0	FALSE
471	ATIC	0	0	0	0	0	0	0	0	0	0	0	0	0	0	0	0	0	0	FALSE
51062	ATL1	0	0	0	0	0	0	0	0	0	0	0	0	0	0	0	0	0	0	FALSE
64225	ATL2	0	0	1	1	0	0	0	0	0	1	0	0	0	0	0	0	0	3	FALSE
25923	ATL3	0	0	0	0	0	0	0	0	0	0	0	0	0	0	0	0	0	0	FALSE
472	ATM	0	0	0	0	0	0	0	0	0	0	0	0	0	0	0	0	0	0	FALSE
23300	ATMIN	0	0	0	0	0	0	0	0	0	0	0	0	0	0	0	0	0	0	FALSE
1822	ATN1	0	0	0	0	0	0	0	0	0	0	0	0	0	0	0	0	0	0	FALSE
474	ATOH1	0	0	0	0	0	0	0	0	0	0	0	0	0	0	0	0	0	0	FALSE
220202	ATOH7	0	0	0	0	0	0	0	0	0	0	0	0	0	0	0	0	0	0	FALSE
84913	ATOH8	0	0	0	0	0	0	0	0	0	0	0	0	0	0	0	0	0	0	FALSE
475	ATOX1	0	0	0	0	0	0	0	0	0	0	0	0	0	0	0	0	0	0	FALSE
57194	ATP10A	0	0	0	0	0	0	0	0	0	0	0	0	0	0	0	0	0	0	FALSE
23120	ATP10B	0	0	0	0	0	0	0	0	0	0	0	0	0	0	0	0	0	0	FALSE
57205	ATP10D	0	0	0	0	0	0	0	0	0	0	0	0	0	0	0	0	0	0	FALSE
23250	ATP11A	0	0	0	0	0	0	0	0	0	0	0	0	0	0	0	0	0	0	FALSE
23200	ATP11B	0	0	0	0	0	0	0	0	0	0	0	0	0	0	0	0	0	0	FALSE
286410	ATP11C	0	0	0	0	0	0	0	0	0	0	0	0	0	0	0	0	0	0	FALSE
479	ATP12A	0	0	0	0	0	0	0	0	0	0	0	0	0	0	0	0	0	0	FALSE
57130	ATP13A1	0	0	0	0	0	0	0	0	0	0	0	0	0	0	0	0	0	0	FALSE
23400	ATP13A2	0	0	0	0	0	0	0	0	0	0	0	0	0	0	0	0	0	0	FALSE
79572	ATP13A3	0	0	0	0	0	0	0	0	0	0	0	0	0	0	0	0	0	0	FALSE
84239	ATP13A4	0	0	0	0	0	0	0	0	0	0	0	0	0	0	0	0	0	0	FALSE
344905	ATP13A5	0	0	0	0	0	0	0	0	0	0	0	0	0	0	0	0	0	0	FALSE
476	ATP1A1	0	1	1	1	1	1	1	1	1	1	1	1	1	1	1	1	1	16	TRUE
477	ATP1A2	0	0	0	0	0	0	0	0	0	0	0	0	0	0	0	0	0	0	FALSE
478	ATP1A3	0	0	0	0	0	0	0	0	0	0	0	0	0	0	0	0	0	0	FALSE
480	ATP1A4	0	0	0	0	0	0	0	0	0	0	0	0	0	0	0	0	0	0	FALSE
481	ATP1B1	0	0	0	0	0	0	0	0	0	0	0	0	0	0	0	0	0	0	FALSE
482	ATP1B2	0	0	0	0	0	0	0	0	0	0	0	0	0	0	0	0	0	0	FALSE
483	ATP1B3	0	0	0	0	0	0	0	0	0	0	0	0	0	0	0	0	0	0	FALSE
23439	ATP1B4	0	0	0	0	0	0	0	0	0	0	0	0	0	0	0	0	0	0	FALSE
91419	ATP23	0	0	0	0	0	0	0	0	0	0	0	0	0	0	0	0	0	0	FALSE
488	ATP2A2	1	1	1	1	1	1	1	1	1	1	1	1	1	1	1	1	1	17	TRUE
489	ATP2A3	0	0	0	0	0	0	0	0	0	0	0	0	0	0	0	0	0	0	FALSE
490	ATP2B1	0	0	0	0	0	0	0	0	0	0	0	0	0	0	0	0	0	0	FALSE
491	ATP2B2	0	0	0	0	0	0	0	0	0	0	0	0	0	0	0	0	0	0	FALSE
492	ATP2B3	0	0	0	0	0	0	0	0	0	0	0	0	0	0	0	0	0	0	FALSE
493	ATP2B4	0	0	0	0	0	0	0	0	0	0	0	0	0	0	0	0	0	0	FALSE
27032	ATP2C1	0	0	0	0	0	0	0	0	0	0	0	0	0	0	0	0	0	0	FALSE
9914	ATP2C2	0	0	0	0	0	0	0	0	0	0	0	0	0	0	0	0	0	0	FALSE
495	ATP4A	0	0	0	0	0	0	0	0	0	0	0	0	0	0	0	0	0	0	FALSE
496	ATP4B	0	0	0	0	0	0	0	0	0	0	0	0	0	0	0	0	0	0	FALSE
498	ATP5F1A	0	1	0	0	0	0	0	0	0	1	0	0	0	0	0	0	0	2	FALSE
506	ATP5F1B	1	1	1	1	1	1	0	1	1	1	1	1	1	1	0	1	0	14	FALSE
509	ATP5F1C	1	1	1	0	1	1	0	0	0	1	0	1	0	1	0	0	0	8	FALSE
513	ATP5F1D	0	1	0	1	0	1	0	0	0	1	0	0	0	0	0	1	0	5	FALSE
514	ATP5F1E	0	0	0	0	0	0	0	0	0	0	0	0	0	0	0	0	0	0	FALSE
93974	ATP5IF1	0	0	0	0	0	0	0	0	0	0	0	0	0	0	0	0	0	0	FALSE
516	ATP5MC1	0	0	0	0	0	0	0	0	0	0	0	0	0	0	0	0	0	0	FALSE
517	ATP5MC2	0	0	0	0	0	0	0	0	0	0	0	0	0	0	0	0	0	0	FALSE
518	ATP5MC3	0	0	0	0	0	0	0	0	0	0	0	0	0	0	0	0	0	0	FALSE
84833	ATP5MD	0	0	0	0	0	0	0	0	0	0	0	0	0	0	0	0	0	0	FALSE
521	ATP5ME	0	1	1	0	1	1	0	0	0	1	1	1	0	0	0	0	0	7	FALSE
9551	ATP5MF	0	0	0	0	0	1	0	0	0	1	0	0	0	0	0	0	0	2	FALSE
10632	ATP5MG	0	0	0	0	0	0	0	0	0	0	0	0	0	0	0	0	0	0	FALSE
9556	ATP5MPL	0	0	0	0	0	0	0	0	0	0	0	0	0	0	0	0	0	0	FALSE
515	ATP5PB	0	0	0	0	0	0	0	0	0	0	0	0	0	0	0	0	0	0	FALSE
10476	ATP5PD	0	0	0	0	0	0	0	0	0	0	0	0	0	0	0	0	0	0	FALSE
522	ATP5PF	0	0	0	0	0	0	0	0	0	0	0	0	0	0	0	0	0	0	FALSE
539	ATP5PO	0	0	0	0	0	0	0	0	0	1	0	0	0	0	0	0	0	1	FALSE
27109	DMAC2L	0	0	0	0	0	0	0	0	0	0	0	0	0	0	0	0	0	0	FALSE
537	ATP6AP1	1	1	1	1	1	1	1	1	1	1	1	1	1	1	1	1	1	17	TRUE
92270	ATP6AP1L	0	0	0	0	0	0	0	0	0	0	0	0	0	0	0	0	0	0	FALSE
10159	ATP6AP2	1	1	1	1	1	1	1	1	1	1	1	1	1	1	1	1	1	17	TRUE
535	ATP6V0A1	0	0	0	0	0	0	0	0	0	0	0	0	0	0	0	0	0	0	FALSE
23545	ATP6V0A2	0	0	0	0	0	0	0	0	0	0	0	0	0	0	0	0	0	0	FALSE
50617	ATP6V0A4	0	0	0	0	0	0	0	0	0	0	0	0	0	0	0	0	0	0	FALSE
533	ATP6V0B	1	1	1	1	1	1	1	1	1	1	1	1	1	1	1	1	1	17	TRUE
527	ATP6V0C	1	1	1	1	1	1	1	1	1	1	1	1	1	1	1	1	1	17	TRUE
9114	ATP6V0D1	0	1	1	0	1	1	1	1	0	1	0	1	0	1	0	0	0	9	FALSE
245972	ATP6V0D2	0	0	0	0	0	0	0	0	0	0	0	0	0	0	0	0	0	0	FALSE
8992	ATP6V0E1	0	0	0	0	0	0	0	0	0	0	0	0	0	0	0	0	0	0	FALSE
155066	ATP6V0E2	0	0	0	0	0	0	0	0	0	0	0	0	0	0	0	0	0	0	FALSE
523	ATP6V1A	1	1	1	1	1	1	1	1	1	1	1	1	1	1	1	1	1	17	TRUE
525	ATP6V1B1	0	0	0	0	0	0	0	0	0	0	0	0	0	0	0	0	0	0	FALSE
526	ATP6V1B2	1	1	1	1	1	1	1	1	1	1	1	1	1	1	1	1	1	17	TRUE
528	ATP6V1C1	0	0	1	0	0	0	0	0	0	1	0	1	0	0	0	0	0	3	FALSE
245973	ATP6V1C2	0	0	0	0	0	0	0	0	0	0	0	0	0	0	0	0	0	0	FALSE
51382	ATP6V1D	0	0	0	0	0	0	1	0	0	1	0	0	1	0	0	0	0	3	FALSE
9296	ATP6V1F	1	1	1	1	1	1	1	1	1	1	1	1	1	1	1	1	1	17	TRUE
534	ATP6V1G2	0	0	0	0	0	0	0	0	0	0	0	0	0	0	0	0	0	0	FALSE
127124	ATP6V1G3	0	0	0	0	0	0	0	0	0	0	0	0	0	0	0	0	0	0	FALSE
51606	ATP6V1H	0	0	0	0	0	0	0	0	0	0	0	0	0	0	0	0	0	0	FALSE
538	ATP7A	0	0	0	0	0	0	0	0	0	0	0	0	0	0	0	0	0	0	FALSE
540	ATP7B	0	0	0	0	0	0	0	0	0	0	0	0	0	0	0	0	0	0	FALSE
10396	ATP8A1	0	0	0	0	0	0	0	0	0	0	0	0	0	0	0	0	0	0	FALSE
51761	ATP8A2	0	0	0	0	0	0	0	0	0	0	0	0	0	0	0	0	0	0	FALSE
5205	ATP8B1	0	0	0	0	0	0	0	0	0	0	0	0	0	0	0	0	0	0	FALSE
57198	ATP8B2	0	0	0	0	0	0	0	0	0	0	0	0	0	0	0	0	0	0	FALSE
148229	ATP8B3	0	0	0	0	0	0	0	0	0	0	0	0	0	0	0	0	0	0	FALSE
79895	ATP8B4	0	0	0	0	0	0	0	0	0	0	0	0	0	0	0	0	0	0	FALSE
10079	ATP9A	0	0	0	0	0	0	0	0	0	0	0	0	0	0	0	0	0	0	FALSE
374868	ATP9B	0	0	0	0	0	0	0	0	0	0	0	0	0	0	0	0	0	0	FALSE
64756	ATPAF1	0	0	0	0	0	0	0	0	0	0	0	0	0	0	0	0	0	0	FALSE
91647	ATPAF2	0	0	0	0	0	0	0	0	0	0	0	0	0	0	0	0	0	0	FALSE
545	ATR	1	1	1	1	1	1	0	1	1	1	1	1	1	1	1	1	1	16	TRUE
51374	ATRAID	0	0	0	0	0	0	0	0	0	0	0	0	0	0	0	0	0	0	FALSE
84126	ATRIP	1	0	0	0	0	0	0	0	0	1	0	0	0	0	1	1	0	4	FALSE
8455	ATRN	0	0	0	0	0	0	0	0	0	0	0	0	0	0	0	0	0	0	FALSE
26033	ATRNL1	0	0	0	0	0	0	0	0	0	0	0	0	0	0	0	0	0	0	FALSE
546	ATRX	0	0	0	0	0	0	0	0	0	0	0	0	0	0	0	0	0	0	FALSE
6310	ATXN1	0	0	0	0	0	0	0	0	0	0	0	0	0	0	0	0	0	0	FALSE
25814	ATXN10	0	0	0	0	0	0	0	0	0	0	0	0	0	0	0	0	0	0	FALSE
6311	ATXN2	0	0	0	0	0	0	0	0	0	0	0	0	0	0	0	0	0	0	FALSE
11273	ATXN2L	0	0	0	0	0	0	0	0	0	0	0	0	0	0	0	0	0	0	FALSE
4287	ATXN3	0	0	0	0	0	0	0	0	0	0	0	0	0	0	0	0	0	0	FALSE
6314	ATXN7	0	0	0	0	0	0	0	0	0	0	0	0	0	0	0	0	0	0	FALSE
222255	ATXN7L1	0	0	0	0	0	0	0	0	0	0	0	0	0	0	0	0	0	0	FALSE
127002	ATXN7L2	0	0	0	0	0	0	0	0	0	0	0	0	0	0	0	0	0	0	FALSE
549	AUH	0	0	0	0	0	0	0	0	0	0	0	0	0	0	0	0	0	0	FALSE
550	AUP1	0	0	0	0	0	0	0	0	0	0	0	0	0	0	0	0	0	0	FALSE
6790	AURKA	1	1	1	1	1	1	1	1	1	1	1	1	1	1	1	1	1	17	TRUE
54998	AURKAIP1	0	0	0	0	0	0	0	0	0	0	0	0	0	0	0	0	0	0	FALSE
9212	AURKB	1	1	1	1	1	1	1	1	1	1	1	1	1	1	1	1	1	17	TRUE
6795	AURKC	0	0	0	0	0	0	0	0	0	0	0	0	0	0	0	0	0	0	FALSE
26053	AUTS2	0	0	0	0	0	0	0	0	0	0	0	0	0	0	0	0	0	0	FALSE
57099	AVEN	0	0	0	0	0	0	0	0	0	0	0	0	0	0	0	0	0	0	FALSE
10677	AVIL	0	0	0	0	0	0	0	0	0	0	0	0	0	0	0	0	0	0	FALSE
23080	AVL9	0	0	0	0	0	0	0	0	0	0	0	0	0	0	0	0	0	0	FALSE
551	AVP	0	0	0	0	0	0	0	0	0	0	0	0	0	0	0	0	0	0	FALSE
60370	AVPI1	0	0	0	0	0	0	0	0	0	0	0	0	0	0	0	0	0	0	FALSE
552	AVPR1A	0	0	0	0	0	0	0	0	0	0	0	0	0	0	0	0	0	0	FALSE
553	AVPR1B	0	0	0	0	0	0	0	0	0	0	0	0	0	0	0	0	0	0	FALSE
554	AVPR2	0	0	0	0	0	0	0	0	0	0	0	0	0	0	0	0	0	0	FALSE
158833	AWAT1	0	0	0	0	0	0	0	0	0	0	0	0	0	0	0	0	0	0	FALSE
158835	AWAT2	0	0	0	0	0	0	0	0	0	0	0	0	0	0	0	0	0	0	FALSE
126859	AXDND1	0	0	0	0	0	0	0	0	0	0	0	0	0	0	0	0	0	0	FALSE
8312	AXIN1	0	0	0	0	0	0	0	0	0	0	0	0	0	0	0	0	0	0	FALSE
8313	AXIN2	0	0	0	0	0	0	0	0	0	0	0	0	0	0	0	0	0	0	FALSE
558	AXL	0	0	0	0	0	0	0	0	0	0	0	0	0	0	0	0	0	0	FALSE
563	AZGP1	0	0	0	0	0	0	0	0	0	0	0	0	0	0	0	0	0	0	FALSE
64343	AZI2	0	0	0	0	0	0	0	0	0	0	0	0	0	0	0	0	0	0	FALSE
51582	AZIN1	0	0	0	0	0	0	0	0	0	0	0	0	0	0	0	0	0	0	FALSE
113451	AZIN2	0	0	0	0	0	0	0	0	0	0	0	0	0	0	0	0	0	0	FALSE
566	AZU1	0	0	0	0	0	0	0	0	0	0	0	0	0	0	0	0	0	0	FALSE
567	B2M	0	0	0	0	0	0	0	0	0	0	0	0	0	0	0	0	0	0	FALSE
8706	B3GALNT1	0	0	0	0	0	0	0	0	0	0	0	0	0	0	0	0	0	0	FALSE
148789	B3GALNT2	0	0	0	0	0	0	0	0	0	0	0	0	0	0	0	0	0	0	FALSE
8708	B3GALT1	0	0	0	0	0	0	0	0	0	0	0	0	0	0	0	0	0	0	FALSE
8707	B3GALT2	0	0	0	0	0	0	0	0	0	0	0	0	0	0	0	0	0	0	FALSE
8705	B3GALT4	0	0	0	0	0	0	0	0	0	0	0	0	0	0	0	0	0	0	FALSE
10317	B3GALT5	0	0	0	0	0	0	0	0	0	0	0	0	0	0	0	0	0	0	FALSE
126792	B3GALT6	0	0	0	0	0	0	0	0	0	0	0	0	0	0	0	0	0	0	FALSE
27087	B3GAT1	0	0	0	0	0	0	0	0	0	0	0	0	0	0	0	0	0	0	FALSE
135152	B3GAT2	0	0	0	0	0	0	0	0	0	0	0	0	0	0	0	0	0	0	FALSE
26229	B3GAT3	0	0	0	0	0	0	0	0	0	0	0	0	0	0	0	0	0	0	FALSE
145173	B3GLCT	0	0	0	0	0	0	0	0	0	0	0	0	0	0	0	0	0	0	FALSE
10678	B3GNT2	0	0	0	0	0	0	0	0	0	0	0	0	0	0	0	0	0	0	FALSE
10331	B3GNT3	0	0	0	0	0	0	0	0	0	0	0	0	0	0	0	0	0	0	FALSE
79369	B3GNT4	0	0	0	0	0	0	0	0	0	0	0	0	0	0	0	0	0	0	FALSE
84002	B3GNT5	0	0	0	0	0	0	0	0	0	0	0	0	0	0	0	0	0	0	FALSE
192134	B3GNT6	0	0	0	0	0	0	0	0	0	0	0	0	0	0	0	0	0	0	FALSE
374907	B3GNT8	0	0	0	0	0	0	0	0	0	0	0	0	0	0	0	0	0	0	FALSE
146712	B3GNTL1	0	0	0	0	0	0	0	0	0	0	0	0	0	0	0	0	0	0	FALSE
2583	B4GALNT1	0	0	0	0	0	0	0	0	0	0	0	0	0	0	0	0	0	0	FALSE
124872	B4GALNT2	0	0	0	0	0	0	0	0	0	0	0	0	0	0	0	0	0	0	FALSE
283358	B4GALNT3	0	0	0	0	0	0	0	0	0	0	0	0	0	0	0	0	0	0	FALSE
338707	B4GALNT4	0	0	0	0	0	0	0	0	0	0	0	0	0	0	0	0	0	0	FALSE
2683	B4GALT1	0	0	0	0	0	0	0	0	0	0	0	0	0	0	0	0	0	0	FALSE
8704	B4GALT2	0	0	0	0	0	0	0	0	0	0	0	0	0	0	0	0	0	0	FALSE
8703	B4GALT3	0	0	0	0	0	0	0	0	0	0	0	0	0	0	0	0	0	0	FALSE
8702	B4GALT4	0	0	0	0	0	0	0	0	0	0	0	0	0	0	0	0	0	0	FALSE
9334	B4GALT5	0	0	0	0	0	0	0	0	0	0	0	0	0	0	0	0	0	0	FALSE
11285	B4GALT7	0	0	0	0	0	0	0	0	0	0	0	0	0	0	0	0	0	0	FALSE
27077	B9D1	0	0	0	0	0	0	0	0	0	0	0	0	0	0	0	0	0	0	FALSE
79870	BAALC	0	0	0	0	0	0	0	0	0	0	0	0	0	0	0	0	0	0	FALSE
570	BAAT	0	0	0	0	0	0	0	0	0	0	0	0	0	0	0	0	0	0	FALSE
9577	BABAM2	0	0	0	0	0	0	0	0	0	0	0	0	0	0	0	0	0	0	FALSE
23621	BACE1	0	0	0	0	0	0	0	0	0	0	0	0	0	0	0	0	0	0	FALSE
25825	BACE2	0	0	0	0	0	0	0	0	0	0	0	0	0	0	0	0	0	0	FALSE
571	BACH1	0	0	0	0	0	0	0	0	0	0	0	0	0	0	0	0	0	0	FALSE
60468	BACH2	0	0	0	0	0	0	0	0	0	0	0	0	0	0	0	0	0	0	FALSE
572	BAD	0	0	0	0	0	0	0	0	0	0	0	0	0	0	0	0	0	0	FALSE
573	BAG1	0	0	0	0	0	0	0	0	0	0	0	0	0	0	0	0	0	0	FALSE
9532	BAG2	0	0	0	0	0	0	0	0	0	0	0	0	0	0	0	0	0	0	FALSE
9531	BAG3	0	0	0	0	0	0	0	0	0	0	0	0	0	0	0	0	0	0	FALSE
9530	BAG4	0	0	0	0	0	0	0	0	0	0	0	0	0	0	0	0	0	0	FALSE
9529	BAG5	0	0	0	0	0	0	0	0	0	0	0	0	0	0	0	0	0	0	FALSE
7917	BAG6	0	0	0	0	0	0	0	0	0	0	0	0	0	0	0	0	0	0	FALSE
22893	BAHD1	0	0	0	0	0	0	0	0	0	0	0	0	0	0	0	0	0	0	FALSE
10458	BAIAP2	0	0	0	0	0	0	0	0	0	0	0	0	0	0	0	0	0	0	FALSE
55971	BAIAP2L1	0	0	0	0	0	0	0	0	0	0	0	0	0	0	0	0	0	0	FALSE
80115	BAIAP2L2	0	0	0	0	0	0	0	0	0	0	0	0	0	0	0	0	0	0	FALSE
8938	BAIAP3	0	0	0	0	0	0	0	0	0	0	0	0	0	0	0	0	0	0	FALSE
578	BAK1	0	0	0	0	0	0	0	0	0	0	0	0	0	0	0	0	0	0	FALSE
25805	BAMBI	0	0	0	0	0	0	0	0	0	0	0	0	0	0	0	0	0	0	FALSE
8815	BANF1	1	1	1	1	1	1	1	1	1	1	1	1	1	1	1	1	1	17	TRUE
140836	BANF2	0	0	0	0	0	0	0	0	0	0	0	0	0	0	0	0	0	0	FALSE
55024	BANK1	0	0	0	0	0	0	0	0	0	0	0	0	0	0	0	0	0	0	FALSE
8314	BAP1	1	0	0	0	0	0	0	0	0	1	0	0	0	0	0	0	0	2	FALSE
580	BARD1	0	0	0	0	0	0	0	0	0	0	0	0	0	0	0	0	0	0	FALSE
343472	BARHL2	0	0	0	0	0	0	0	0	0	0	0	0	0	0	0	0	0	0	FALSE
56033	BARX1	0	0	0	0	0	0	0	0	0	0	0	0	0	0	0	0	0	0	FALSE
8538	BARX2	0	0	0	0	0	0	0	0	0	0	0	0	0	0	0	0	0	0	FALSE
10409	BASP1	0	0	0	0	0	0	0	0	0	0	0	0	0	0	0	0	0	0	FALSE
10538	BATF	0	0	0	0	0	0	0	0	0	0	0	0	0	0	0	0	0	0	FALSE
116071	BATF2	0	0	0	0	0	0	0	0	0	0	0	0	0	0	0	0	0	0	FALSE
55509	BATF3	0	0	0	0	0	0	0	0	0	0	0	0	0	0	0	0	0	0	FALSE
581	BAX	0	0	0	0	0	0	0	0	0	0	0	0	0	0	0	0	0	0	FALSE
11177	BAZ1A	0	0	0	0	0	0	0	0	0	0	0	0	0	0	0	0	0	0	FALSE
9031	BAZ1B	0	0	0	0	0	0	0	0	0	0	0	0	0	0	0	0	0	0	FALSE
11176	BAZ2A	0	0	0	0	0	0	0	0	0	0	0	0	0	0	0	0	0	0	FALSE
29994	BAZ2B	0	0	0	0	0	0	0	0	0	0	0	0	0	0	0	0	0	0	FALSE
27113	BBC3	0	0	0	0	0	0	0	0	0	0	0	0	0	0	0	0	0	0	FALSE
8424	BBOX1	0	0	0	0	0	0	0	0	0	0	0	0	0	0	0	0	0	0	FALSE
582	BBS1	0	0	0	0	0	0	0	0	0	0	0	0	0	0	0	0	0	0	FALSE
583	BBS2	0	0	0	0	0	0	0	0	0	0	0	0	0	0	0	0	0	0	FALSE
585	BBS4	0	0	0	0	0	0	0	0	0	0	0	0	0	0	0	0	0	0	FALSE
129880	BBS5	0	0	0	0	0	0	0	0	0	0	0	0	0	0	0	0	0	0	FALSE
55212	BBS7	0	0	0	0	0	0	0	0	0	0	0	0	0	0	0	0	0	0	FALSE
27241	BBS9	0	0	0	0	0	0	0	0	0	0	0	0	0	0	0	0	0	0	FALSE
56987	BBX	0	0	0	0	0	0	0	0	0	0	0	0	0	0	0	0	0	0	FALSE
4059	BCAM	0	0	0	0	0	0	0	0	0	0	0	0	0	0	0	0	0	0	FALSE
63827	BCAN	0	0	0	0	0	0	0	0	0	0	0	0	0	0	0	0	0	0	FALSE
55973	BCAP29	0	0	0	0	0	0	0	0	0	0	0	0	0	0	0	0	0	0	FALSE
9564	BCAR1	0	0	0	0	0	0	0	0	0	1	0	0	1	0	0	0	0	2	FALSE
8412	BCAR3	0	0	0	0	0	0	0	0	0	0	0	0	0	0	0	0	0	0	FALSE
8537	BCAS1	0	0	0	0	0	0	0	0	0	0	0	0	0	0	0	0	0	0	FALSE
10286	BCAS2	0	0	0	0	0	0	0	0	0	1	0	0	0	0	0	0	0	1	FALSE
54828	BCAS3	0	0	0	0	0	0	0	0	0	0	0	0	0	0	0	0	0	0	FALSE
55653	BCAS4	0	0	0	0	0	0	0	0	0	0	0	0	0	0	0	0	0	0	FALSE
586	BCAT1	0	0	0	0	0	0	0	0	0	0	0	0	0	0	0	0	0	0	FALSE
587	BCAT2	0	0	0	0	0	0	0	0	0	0	0	0	0	0	0	0	0	0	FALSE
56647	BCCIP	0	1	0	0	0	0	0	0	0	0	1	0	0	1	0	0	0	3	FALSE
144233	BCDIN3D	0	0	0	0	0	0	0	0	0	0	0	0	0	0	0	0	0	0	FALSE
590	BCHE	0	0	0	0	0	0	0	0	0	0	0	0	0	0	0	0	0	0	FALSE
593	BCKDHA	0	0	0	0	0	0	0	0	0	0	0	0	0	0	0	0	0	0	FALSE
594	BCKDHB	0	0	0	0	0	0	0	0	0	0	0	0	0	0	0	0	0	0	FALSE
10295	BCKDK	0	0	0	0	0	0	0	0	0	0	0	0	0	0	0	0	0	0	FALSE
8915	BCL10	0	0	0	0	0	0	0	0	0	0	0	0	0	0	0	0	0	0	FALSE
53335	BCL11A	0	0	0	0	0	0	0	0	0	0	0	0	0	0	0	0	0	0	FALSE
64919	BCL11B	0	0	0	0	0	0	0	0	0	0	0	0	0	0	0	0	0	0	FALSE
596	BCL2	0	0	0	0	0	0	0	0	0	0	0	0	0	0	0	0	0	0	FALSE
597	BCL2A1	0	0	0	0	0	0	0	0	0	0	0	0	0	0	0	0	0	0	FALSE
598	BCL2L1	0	0	0	0	0	1	1	0	0	1	0	0	0	0	0	0	0	3	FALSE
10017	BCL2L10	0	0	0	0	0	0	0	0	0	0	0	0	0	0	0	0	0	0	FALSE
10018	BCL2L11	0	0	0	0	0	0	0	0	0	0	0	0	0	0	0	0	0	0	FALSE
83596	BCL2L12	0	0	0	0	0	0	0	0	0	0	0	0	0	0	0	0	0	0	FALSE
23786	BCL2L13	0	0	0	0	0	0	0	0	0	0	0	0	0	0	0	0	0	0	FALSE
79370	BCL2L14	0	0	0	0	0	0	0	0	0	0	0	0	0	0	0	0	0	0	FALSE
599	BCL2L2	0	0	0	0	0	0	0	0	0	0	0	0	0	0	0	0	0	0	FALSE
602	BCL3	0	0	0	0	0	0	0	0	0	0	0	0	0	0	0	0	0	0	FALSE
604	BCL6	0	0	0	0	0	0	0	0	0	0	0	0	0	0	0	0	0	0	FALSE
255877	BCL6B	0	0	0	0	0	0	0	0	0	0	0	0	0	0	0	0	0	0	FALSE
605	BCL7A	0	0	0	0	0	0	0	0	0	0	0	0	0	0	0	0	0	0	FALSE
9275	BCL7B	0	0	0	0	0	0	0	0	0	0	0	0	0	0	0	0	0	0	FALSE
9274	BCL7C	0	0	0	0	0	0	0	0	0	0	0	0	0	0	0	0	0	0	FALSE
607	BCL9	0	0	0	0	0	0	0	0	0	0	0	0	0	0	0	0	0	0	FALSE
283149	BCL9L	0	0	0	0	0	0	0	0	0	0	0	0	0	0	0	0	0	0	FALSE
9774	BCLAF1	0	1	1	1	1	0	1	0	0	1	1	1	1	0	0	0	1	10	FALSE
256643	BCLAF3	0	0	0	0	0	0	0	0	0	0	0	0	0	0	0	0	0	0	FALSE
53630	BCO1	0	0	0	0	0	0	0	0	0	0	0	0	0	0	0	0	0	0	FALSE
83875	BCO2	0	0	0	0	0	0	0	0	0	0	0	0	0	0	0	0	0	0	FALSE
54880	BCOR	0	0	0	0	0	0	0	0	0	0	0	0	0	0	0	0	0	0	FALSE
63035	BCORL1	0	0	0	0	0	0	0	0	0	0	0	0	0	0	0	0	0	0	FALSE
613	BCR	0	0	0	0	0	0	0	0	0	0	0	0	0	0	0	0	0	0	FALSE
617	BCS1L	0	0	0	0	0	0	0	0	0	0	0	0	0	0	0	0	0	0	FALSE
622	BDH1	0	0	0	0	0	0	0	0	0	0	0	0	0	0	0	0	0	0	FALSE
56898	BDH2	0	0	0	0	0	0	0	0	0	0	0	0	0	0	0	0	0	0	FALSE
623	BDKRB1	0	0	0	0	0	0	0	0	0	0	0	0	0	0	0	0	0	0	FALSE
624	BDKRB2	0	0	0	0	0	0	0	0	0	0	0	0	0	0	0	0	0	0	FALSE
627	BDNF	0	0	0	0	0	0	0	0	0	0	0	0	0	0	0	0	0	0	FALSE
55814	BDP1	0	0	0	0	0	0	0	0	0	0	0	0	0	0	0	0	0	0	FALSE
8678	BECN1	0	0	0	0	0	0	0	0	0	0	0	0	0	0	0	0	0	0	FALSE
57596	BEGAIN	0	0	0	0	0	0	0	0	0	0	0	0	0	0	0	0	0	0	FALSE
139105	BEND2	0	0	0	0	0	0	0	0	0	0	0	0	0	0	0	0	0	0	FALSE
79656	BEND5	0	0	0	0	0	0	0	0	0	0	0	0	0	0	0	0	0	0	FALSE
221336	BEND6	0	0	0	0	0	0	0	0	0	0	0	0	0	0	0	0	0	0	FALSE
7439	BEST1	0	0	0	0	0	0	0	0	0	0	0	0	0	0	0	0	0	0	FALSE
54831	BEST2	0	0	0	0	0	0	0	0	0	0	0	0	0	0	0	0	0	0	FALSE
144453	BEST3	0	0	0	0	0	0	0	0	0	0	0	0	0	0	0	0	0	0	FALSE
266675	BEST4	0	0	0	0	0	0	0	0	0	0	0	0	0	0	0	0	0	0	FALSE
10282	BET1	0	0	0	0	0	0	0	0	0	0	0	0	0	0	0	0	0	0	FALSE
55859	BEX1	0	0	0	0	0	0	0	0	0	0	0	0	0	0	0	0	0	0	FALSE
84707	BEX2	0	0	0	0	0	0	0	0	0	0	0	0	0	0	0	0	0	0	FALSE
27018	BEX3	0	0	0	0	0	0	0	0	0	0	0	0	0	0	0	0	0	0	FALSE
340542	BEX5	0	0	0	0	0	0	0	0	0	0	0	0	0	0	0	0	0	0	FALSE
51283	BFAR	0	0	0	0	0	0	0	0	0	0	0	0	0	0	0	0	0	0	FALSE
631	BFSP1	0	0	0	0	0	0	0	0	0	0	0	0	0	0	0	0	0	0	FALSE
8419	BFSP2	0	0	0	0	0	0	0	0	0	0	0	0	0	0	0	0	0	0	FALSE
632	BGLAP	0	0	0	0	0	0	0	0	0	0	0	0	0	0	0	0	0	0	FALSE
633	BGN	0	0	0	0	0	0	0	0	0	0	0	0	0	0	0	0	0	0	FALSE
168620	BHLHA15	0	0	0	0	0	0	0	0	0	0	0	0	0	0	0	0	0	0	FALSE
80823	BHLHB9	0	0	0	0	0	0	0	0	0	0	0	0	0	0	0	0	0	0	FALSE
27319	BHLHE22	0	0	0	0	0	0	0	0	0	0	0	0	0	0	0	0	0	0	FALSE
128408	BHLHE23	0	0	0	0	0	0	0	0	0	0	0	0	0	0	0	0	0	0	FALSE
8553	BHLHE40	0	0	0	0	0	0	0	0	0	0	0	0	0	0	0	0	0	0	FALSE
79365	BHLHE41	0	0	0	0	0	0	0	0	0	0	0	0	0	0	0	0	0	0	FALSE
635	BHMT	0	0	0	0	0	0	0	0	0	0	0	0	0	0	0	0	0	0	FALSE
23743	BHMT2	0	0	0	0	0	0	0	0	0	0	0	0	0	0	0	0	0	0	FALSE
80114	BICC1	0	0	0	0	0	0	0	0	0	0	0	0	0	0	0	0	0	0	FALSE
636	BICD1	0	0	0	0	0	0	0	0	0	0	0	0	0	0	0	0	0	0	FALSE
23299	BICD2	0	0	0	0	0	0	0	0	0	0	0	0	0	0	0	0	0	0	FALSE
92558	BICDL1	0	0	0	0	0	0	0	0	0	0	0	0	0	0	0	0	0	0	FALSE
29998	BICRA	0	0	0	0	0	0	0	0	0	0	0	0	0	0	0	0	0	0	FALSE
637	BID	0	0	0	0	0	0	0	0	0	0	0	0	0	0	0	0	0	0	FALSE
638	BIK	0	0	0	0	0	0	0	0	0	0	0	0	0	0	0	0	0	0	FALSE
274	BIN1	0	0	0	0	0	0	0	0	0	0	0	0	0	0	0	0	0	0	FALSE
51411	BIN2	0	0	0	0	0	0	0	0	0	0	0	0	0	0	0	0	0	0	FALSE
55909	BIN3	0	0	0	0	0	0	0	0	0	0	0	0	0	0	0	0	0	0	FALSE
329	BIRC2	0	0	0	0	0	0	0	0	0	0	0	0	0	0	0	0	0	0	FALSE
330	BIRC3	0	0	0	0	0	0	0	0	0	0	0	0	0	0	0	0	0	0	FALSE
332	BIRC5	1	1	1	1	1	1	1	1	1	1	1	1	1	1	1	1	1	17	TRUE
57448	BIRC6	0	0	0	0	0	0	0	0	0	0	0	0	0	0	0	0	0	0	FALSE
79444	BIRC7	0	0	0	0	0	0	0	0	0	0	0	0	0	0	0	0	0	0	FALSE
112401	BIRC8	0	0	0	0	0	0	0	0	0	0	0	0	0	0	0	0	0	0	FALSE
54841	BIVM	0	0	0	0	0	0	0	0	0	0	0	0	0	0	0	0	0	0	FALSE
10904	BLCAP	0	0	0	0	0	0	0	0	0	0	0	0	0	0	0	0	0	0	FALSE
640	BLK	0	0	0	0	0	0	0	0	0	0	0	0	0	0	0	0	0	0	FALSE
641	BLM	0	0	0	0	0	0	0	0	0	0	0	0	0	0	0	0	0	0	FALSE
642	BLMH	0	0	0	0	0	0	0	0	0	0	0	0	0	0	0	0	0	0	FALSE
29760	BLNK	0	0	0	0	0	0	0	0	0	0	0	0	0	0	0	0	0	0	FALSE
2647	BLOC1S1	0	0	0	0	0	0	0	0	0	0	0	0	0	0	0	0	0	0	FALSE
282991	BLOC1S2	0	0	0	0	0	0	0	0	0	0	0	0	0	0	0	0	0	0	FALSE
55330	BLOC1S4	0	0	0	0	0	0	0	0	0	0	0	0	0	0	0	0	0	0	FALSE
63915	BLOC1S5	0	0	0	0	0	0	0	0	0	0	0	0	0	0	0	0	0	0	FALSE
26258	BLOC1S6	0	0	0	0	0	0	0	0	0	0	0	0	0	0	0	0	0	0	FALSE
644	BLVRA	0	0	0	0	0	0	0	0	0	0	0	0	0	0	0	0	0	0	FALSE
645	BLVRB	0	0	0	0	0	0	0	0	0	0	0	0	0	0	0	0	0	0	FALSE
8548	BLZF1	0	0	0	0	0	0	0	0	0	0	0	0	0	0	0	0	0	0	FALSE
90427	BMF	0	0	0	0	0	0	0	0	0	0	0	0	0	0	0	0	0	0	FALSE
648	BMI1	0	0	0	0	0	0	0	0	0	0	0	0	0	0	0	0	0	0	FALSE
649	BMP1	0	0	0	0	0	0	0	0	0	0	0	0	0	0	0	0	0	0	FALSE
27302	BMP10	0	0	0	0	0	0	0	0	0	0	0	0	0	0	0	0	0	0	FALSE
9210	BMP15	0	0	0	0	0	0	0	0	0	0	0	0	0	0	0	0	0	0	FALSE
650	BMP2	0	0	0	0	0	0	0	0	0	0	0	0	0	0	0	0	0	0	FALSE
55589	BMP2K	0	0	0	0	0	0	0	0	0	0	0	0	0	0	0	0	0	0	FALSE
651	BMP3	0	0	0	0	0	0	0	0	0	0	0	0	0	0	0	0	0	0	FALSE
652	BMP4	0	0	0	0	0	0	0	0	0	0	0	0	0	0	0	0	0	0	FALSE
653	BMP5	0	0	0	0	0	0	0	0	0	0	0	0	0	0	0	0	0	0	FALSE
654	BMP6	0	0	0	0	0	0	0	0	0	0	0	0	0	0	0	0	0	0	FALSE
353500	BMP8A	0	0	0	0	0	0	0	0	0	0	0	0	0	0	0	0	0	0	FALSE
656	BMP8B	0	0	0	0	0	0	0	0	0	0	0	0	0	0	0	0	0	0	FALSE
168667	BMPER	0	0	0	0	0	0	0	0	0	0	0	0	0	0	0	0	0	0	FALSE
657	BMPR1A	0	0	0	0	0	0	0	0	0	0	0	0	0	0	0	0	0	0	FALSE
658	BMPR1B	0	0	0	0	0	0	0	0	0	0	0	0	0	0	0	0	0	0	FALSE
659	BMPR2	0	0	0	0	0	0	0	0	0	0	0	0	0	0	0	0	0	0	FALSE
9790	BMS1	1	1	1	1	1	1	1	1	1	1	1	1	1	1	1	1	1	17	TRUE
154743	BMT2	0	0	0	0	0	0	0	0	0	0	0	0	0	0	0	0	0	0	FALSE
660	BMX	0	0	0	0	0	0	0	0	0	0	0	0	0	0	0	0	0	0	FALSE
646	BNC1	0	0	0	0	0	0	0	0	0	0	0	0	0	0	0	0	0	0	FALSE
54796	BNC2	0	0	0	0	0	0	0	0	0	0	0	0	0	0	0	0	0	0	FALSE
662	BNIP1	0	0	0	0	0	0	0	0	0	0	0	0	0	0	0	0	0	0	FALSE
663	BNIP2	0	0	0	0	0	0	0	0	0	0	0	0	0	0	0	0	0	0	FALSE
664	BNIP3	0	0	0	0	0	0	0	0	0	0	0	0	0	0	0	0	0	0	FALSE
149428	BNIPL	0	0	0	0	0	0	0	0	0	0	0	0	0	0	0	0	0	0	FALSE
91653	BOC	0	0	0	0	0	0	0	0	0	0	0	0	0	0	0	0	0	0	FALSE
666	BOK	0	0	0	0	0	0	0	0	0	0	0	0	0	0	0	0	0	0	FALSE
51027	BOLA1	0	0	0	0	0	0	0	0	0	0	0	0	0	0	0	0	0	0	FALSE
388962	BOLA3	0	0	0	0	0	0	0	0	0	0	0	0	0	0	0	0	0	0	FALSE
66037	BOLL	0	0	0	0	0	0	0	0	0	0	0	0	0	0	0	0	0	0	FALSE
23246	BOP1	1	1	1	1	1	1	1	1	1	1	1	1	1	1	1	1	1	17	TRUE
79866	BORA	0	0	1	1	0	0	0	1	0	1	0	1	1	0	0	1	0	7	FALSE
118426	BORCS5	0	0	0	0	0	0	0	0	0	0	0	0	0	0	0	0	0	0	FALSE
119032	BORCS7	0	0	0	0	0	0	0	0	0	0	0	0	0	0	0	0	0	0	FALSE
669	BPGM	0	0	0	0	0	0	0	0	0	0	0	0	0	0	0	0	0	0	FALSE
670	BPHL	0	0	0	0	0	0	0	0	0	0	0	0	0	0	0	0	0	0	FALSE
671	BPI	0	0	0	0	0	0	0	0	0	0	0	0	0	0	0	0	0	0	FALSE
51297	BPIFA1	0	0	0	0	0	0	0	0	0	0	0	0	0	0	0	0	0	0	FALSE
140683	BPIFA2	0	0	0	0	0	0	0	0	0	0	0	0	0	0	0	0	0	0	FALSE
128861	BPIFA3	0	0	0	0	0	0	0	0	0	0	0	0	0	0	0	0	0	0	FALSE
92747	BPIFB1	0	0	0	0	0	0	0	0	0	0	0	0	0	0	0	0	0	0	FALSE
359710	BPIFB3	0	0	0	0	0	0	0	0	0	0	0	0	0	0	0	0	0	0	FALSE
128859	BPIFB6	0	0	0	0	0	0	0	0	0	0	0	0	0	0	0	0	0	0	FALSE
254240	BPIFC	0	0	0	0	0	0	0	0	0	0	0	0	0	0	0	0	0	0	FALSE
10380	BPNT1	0	0	0	0	0	0	0	0	0	0	0	0	0	0	0	0	0	0	FALSE
2186	BPTF	0	0	0	0	0	0	0	0	0	1	0	0	0	1	0	0	0	2	FALSE
673	BRAF	0	0	0	0	0	0	0	0	0	0	0	0	0	1	0	0	0	1	FALSE
8315	BRAP	0	0	0	0	0	0	0	0	0	0	0	0	0	0	0	0	0	0	FALSE
672	BRCA1	0	0	0	0	0	0	0	0	0	0	0	0	0	0	0	0	0	0	FALSE
675	BRCA2	0	1	0	0	0	0	0	0	0	1	0	0	0	0	0	0	1	3	FALSE
79184	BRCC3	0	0	0	0	0	0	0	0	0	0	0	0	0	0	0	0	0	0	FALSE
23774	BRD1	0	0	0	0	0	0	0	0	0	0	0	0	0	0	0	0	0	0	FALSE
6046	BRD2	0	0	0	0	0	0	0	0	0	0	0	0	0	0	0	0	0	0	FALSE
8019	BRD3	0	0	0	0	0	0	0	0	0	0	0	0	0	0	0	0	0	0	FALSE
23476	BRD4	1	1	1	1	1	1	1	1	1	1	1	1	1	1	1	1	1	17	TRUE
29117	BRD7	0	0	0	0	0	0	0	0	0	0	0	0	0	0	0	0	0	0	FALSE
10902	BRD8	0	0	0	0	0	0	0	0	0	0	0	0	0	0	0	0	0	0	FALSE
65980	BRD9	0	0	0	0	0	0	0	0	0	0	0	0	0	0	0	0	0	0	FALSE
676	BRDT	0	0	0	0	0	0	0	0	0	0	0	0	0	0	0	0	0	0	FALSE
2972	BRF1	1	1	1	1	1	1	1	1	1	1	1	1	1	1	0	1	1	16	TRUE
55290	BRF2	1	1	1	1	1	1	1	1	1	1	1	1	1	1	1	1	1	17	TRUE
25798	BRI3	0	0	0	0	0	0	0	0	0	0	0	0	0	0	0	0	0	0	FALSE
57795	BRINP2	0	0	0	0	0	0	0	0	0	0	0	0	0	0	0	0	0	0	FALSE
339479	BRINP3	0	0	0	0	0	0	0	0	0	0	0	0	0	0	0	0	0	0	FALSE
83990	BRIP1	0	0	0	0	0	0	0	0	0	0	0	0	0	0	0	0	0	0	FALSE
55299	BRIX1	1	1	1	1	1	1	1	1	1	1	1	1	1	1	1	1	1	17	TRUE
55845	BRK1	0	0	0	0	0	0	0	0	0	0	0	0	0	0	0	0	0	0	FALSE
25855	BRMS1	0	0	0	0	0	0	0	0	0	0	0	0	0	0	0	0	0	0	FALSE
84312	BRMS1L	0	0	0	0	0	0	0	0	0	0	0	0	0	0	0	0	0	0	FALSE
148362	BROX	0	0	0	0	0	0	0	0	0	0	0	0	0	0	0	0	0	0	FALSE
7862	BRPF1	0	0	0	0	0	0	0	0	0	0	0	0	0	0	0	0	0	0	FALSE
27154	BRPF3	0	0	0	0	0	0	0	0	0	0	0	0	0	0	0	0	0	0	FALSE
680	BRS3	0	0	0	0	0	0	0	0	0	0	0	0	0	0	0	0	0	0	FALSE
84446	BRSK1	0	0	0	0	0	0	0	0	0	0	0	0	0	0	0	0	0	0	FALSE
9024	BRSK2	0	0	0	0	0	0	0	0	0	0	0	0	0	0	0	0	0	0	FALSE
54014	BRWD1	0	0	0	0	0	0	0	0	0	0	0	0	0	0	0	0	0	0	FALSE
254065	BRWD3	0	0	0	0	0	0	0	0	0	0	0	0	0	0	0	0	0	0	FALSE
26580	BSCL2	0	0	0	0	0	0	0	0	0	0	0	0	0	0	0	0	0	0	FALSE
55108	BSDC1	0	0	0	0	0	0	0	0	0	0	0	0	0	0	0	0	0	0	FALSE
682	BSG	0	0	0	0	0	0	0	0	0	0	0	0	0	0	0	0	0	0	FALSE
8927	BSN	0	0	0	0	0	0	0	0	0	0	0	0	0	0	0	0	0	0	FALSE
7809	BSND	0	0	0	0	0	0	0	0	0	0	0	0	0	0	0	0	0	0	FALSE
54836	BSPRY	0	0	0	0	0	0	0	0	0	0	0	0	0	0	0	0	0	0	FALSE
683	BST1	0	0	0	0	0	0	0	0	0	0	0	0	0	0	0	0	0	0	FALSE
684	BST2	0	0	0	0	0	0	0	0	0	0	0	0	0	0	0	0	0	0	FALSE
9044	BTAF1	0	0	0	0	0	0	0	0	0	0	0	0	0	0	0	0	0	0	FALSE
53339	BTBD1	0	0	0	0	0	0	0	0	0	0	0	0	0	0	0	0	0	0	FALSE
84280	BTBD10	0	0	0	0	0	0	0	0	0	0	0	0	0	0	0	0	0	0	FALSE
121551	BTBD11	0	0	0	0	0	0	0	0	0	0	0	0	0	0	0	0	0	0	FALSE
118663	BTBD16	0	0	0	0	0	0	0	0	0	0	0	0	0	0	0	0	0	0	FALSE
388419	BTBD17	0	0	0	0	0	0	0	0	0	0	0	0	0	0	0	0	0	0	FALSE
643376	BTBD18	0	0	0	0	0	0	0	0	0	0	0	0	0	0	0	0	0	0	FALSE
55643	BTBD2	0	0	0	0	0	0	0	0	0	0	0	0	0	0	0	0	0	0	FALSE
22903	BTBD3	0	0	0	0	0	0	0	0	0	0	0	0	0	0	0	0	0	0	FALSE
90135	BTBD6	0	0	0	0	0	0	0	0	0	0	0	0	0	0	0	0	0	0	FALSE
55727	BTBD7	0	0	0	0	0	0	0	0	0	0	0	0	0	0	0	0	0	0	FALSE
284697	BTBD8	0	0	0	0	0	0	0	0	0	0	0	0	0	0	0	0	0	0	FALSE
114781	BTBD9	0	0	0	0	0	0	0	0	0	0	0	0	0	0	0	0	0	0	FALSE
685	BTC	0	0	0	0	0	0	0	0	0	0	0	0	0	0	0	0	0	0	FALSE
686	BTD	0	0	0	0	0	0	0	0	0	0	0	0	0	0	0	0	0	0	FALSE
689	BTF3	1	0	1	1	1	1	1	0	1	1	0	1	0	1	1	0	1	12	FALSE
91408	BTF3L4	0	0	0	0	0	0	0	0	0	0	0	0	0	0	0	0	0	0	FALSE
694	BTG1	0	0	0	0	0	0	0	0	0	0	0	0	0	0	0	0	0	0	FALSE
7832	BTG2	0	0	0	0	0	0	0	0	0	0	0	0	0	0	0	0	0	0	FALSE
10950	BTG3	0	0	0	0	0	0	0	0	0	0	0	0	0	0	0	0	0	0	FALSE
54766	BTG4	0	0	0	0	0	0	0	0	0	0	0	0	0	0	0	0	0	0	FALSE
695	BTK	0	0	0	0	0	0	0	0	0	0	0	0	0	0	0	0	0	0	FALSE
151888	BTLA	0	0	0	0	0	0	0	0	0	0	0	0	0	0	0	0	0	0	FALSE
696	BTN1A1	0	0	0	0	0	0	0	0	0	0	0	0	0	0	0	0	0	0	FALSE
11120	BTN2A1	0	0	0	0	0	0	0	0	0	0	0	0	0	0	0	0	0	0	FALSE
10385	BTN2A2	0	0	0	0	0	0	0	0	0	0	0	0	0	0	0	0	0	0	FALSE
11119	BTN3A1	0	0	0	0	0	0	0	0	0	0	0	0	0	0	0	0	0	0	FALSE
11118	BTN3A2	0	0	0	0	0	0	0	0	0	0	0	0	0	0	0	0	0	0	FALSE
10384	BTN3A3	0	0	0	0	0	0	0	0	0	0	0	0	0	0	0	0	0	0	FALSE
10917	BTNL3	0	0	0	0	0	0	0	0	0	0	0	0	0	0	0	0	0	0	FALSE
79908	BTNL8	0	0	0	0	0	0	0	0	0	0	0	0	0	0	0	0	0	0	FALSE
153579	BTNL9	0	0	0	0	0	0	0	0	0	0	0	0	0	0	0	0	0	0	FALSE
8945	BTRC	0	0	0	0	0	0	0	0	0	0	0	0	0	0	0	0	0	0	FALSE
699	BUB1	0	1	0	0	0	0	1	0	0	1	0	1	0	1	1	0	1	7	FALSE
701	BUB1B	1	1	1	1	1	1	1	1	1	1	1	1	1	1	1	1	1	17	TRUE
9184	BUB3	1	1	1	1	1	1	1	1	1	1	1	1	1	1	1	1	1	17	TRUE
84811	BUD13	0	0	0	0	0	0	0	0	0	0	0	0	0	0	0	0	1	1	FALSE
114049	BUD23	1	1	1	1	1	1	1	1	1	1	1	1	1	1	1	1	1	17	TRUE
8896	BUD31	1	1	1	1	1	1	1	1	1	1	1	1	1	1	1	1	1	17	TRUE
11149	BVES	0	0	0	0	0	0	0	0	0	0	0	0	0	0	0	0	0	0	FALSE
705	BYSL	1	1	1	1	1	1	1	1	1	1	1	1	1	1	1	1	1	17	TRUE
9689	BZW1	0	0	0	0	0	0	0	0	0	0	0	0	0	0	0	0	0	0	FALSE
28969	BZW2	0	0	0	0	0	0	0	0	0	0	0	0	0	0	0	0	0	0	FALSE
387638	C10orf113	0	0	0	0	0	0	0	0	0	0	0	0	0	0	0	0	0	0	FALSE
399814	C10orf120	0	0	0	0	0	0	0	0	0	0	0	0	0	0	0	0	0	0	FALSE
282966	C10orf53	0	0	0	0	0	0	0	0	0	0	0	0	0	0	0	0	0	0	FALSE
118461	C10orf71	0	0	0	0	0	0	0	0	0	0	0	0	0	0	0	0	0	0	FALSE
387695	C10orf99	0	0	0	0	0	0	0	0	0	0	0	0	0	0	0	0	0	0	FALSE
56673	C11orf16	0	0	0	0	0	0	0	0	0	0	0	0	0	0	0	0	0	0	FALSE
53838	C11orf24	0	0	0	0	0	0	0	0	0	0	0	0	0	0	0	0	0	0	FALSE
143501	C11orf40	0	0	0	0	0	0	0	0	0	0	0	0	0	0	0	0	0	0	FALSE
160298	C11orf42	0	0	0	0	0	0	0	0	0	0	0	0	0	0	0	0	0	0	FALSE
219833	C11orf45	0	0	0	0	0	0	0	0	0	0	0	0	0	0	0	0	0	0	FALSE
79096	C11orf49	0	0	0	0	0	0	0	0	0	0	0	0	0	0	0	0	0	0	FALSE
10944	C11orf58	0	0	0	0	0	0	0	0	0	0	0	0	0	0	0	0	0	0	FALSE
54494	C11orf71	0	0	0	0	0	0	0	0	0	0	0	0	0	0	0	0	0	0	FALSE
119710	C11orf74	0	0	0	0	0	0	0	0	0	0	0	0	0	0	0	0	0	0	FALSE
79703	C11orf80	0	0	0	0	0	0	0	0	0	0	0	0	0	0	0	0	0	0	FALSE
60314	C12orf10	0	0	0	0	0	0	0	0	0	0	0	0	0	0	0	0	0	0	FALSE
57102	C12orf4	0	0	0	0	0	0	0	0	0	0	0	0	0	0	0	0	0	0	FALSE
283461	C12orf40	0	0	0	0	0	0	0	0	0	0	0	0	0	0	0	0	0	0	FALSE
64897	C12orf43	0	0	0	0	0	0	0	0	0	0	0	0	0	0	0	0	0	0	FALSE
121053	C12orf45	0	1	1	0	0	0	0	0	0	1	0	0	0	1	0	0	0	4	FALSE
79794	C12orf49	0	0	0	0	0	0	0	0	0	0	0	0	0	0	0	0	0	0	FALSE
121273	C12orf54	0	0	0	0	0	0	0	0	0	0	0	0	0	0	0	0	0	0	FALSE
144608	C12orf60	0	0	0	0	0	0	0	0	0	0	0	0	0	0	0	0	0	0	FALSE
144577	C12orf66	0	0	0	0	0	0	0	0	0	0	0	0	0	0	0	0	0	0	FALSE
55017	C14orf119	0	0	0	0	0	0	0	0	0	0	0	0	0	0	0	0	0	0	FALSE
122525	C14orf28	0	0	0	0	0	0	0	0	0	0	0	0	0	0	0	0	0	0	FALSE
317761	C14orf39	0	0	0	0	0	0	0	0	0	0	0	0	0	0	0	0	0	0	FALSE
60686	C14orf93	0	0	0	0	0	0	0	0	0	0	0	0	0	0	0	0	0	0	FALSE
56905	C15orf39	0	0	0	0	0	0	0	0	0	0	0	0	0	0	0	0	0	0	FALSE
84419	C15orf48	0	0	0	0	0	0	0	0	0	0	0	0	0	0	0	0	0	0	FALSE
145853	C15orf61	0	0	0	0	0	0	0	0	0	0	0	0	0	0	0	0	0	0	FALSE
145788	C15orf65	0	0	0	0	0	0	0	0	0	0	0	0	0	0	0	0	0	0	FALSE
89927	BMERB1	0	0	0	0	0	0	0	0	0	0	0	0	0	0	0	0	0	0	FALSE
123775	C16orf46	0	0	0	0	0	0	0	0	0	0	0	0	0	0	0	0	0	0	FALSE
64755	C16orf58	0	0	0	0	0	0	0	0	0	0	0	0	0	0	0	0	0	0	FALSE
146562	C16orf71	0	0	0	0	0	0	0	0	0	0	0	0	0	0	0	0	0	0	FALSE
123970	C16orf78	0	0	0	0	0	0	0	0	0	0	0	0	0	0	0	0	0	0	FALSE
388272	C16orf87	0	0	0	0	0	0	0	0	0	0	0	0	0	0	0	0	0	0	FALSE
146556	C16orf89	0	0	0	0	0	0	0	0	0	0	0	0	0	0	0	0	0	0	FALSE
339263	LINC02693	0	0	0	0	0	0	0	0	0	0	0	0	0	0	0	0	0	0	FALSE
284018	C17orf58	0	0	0	0	0	0	0	0	0	0	0	0	0	0	0	0	0	0	FALSE
124773	C17orf64	0	0	0	0	0	0	0	0	0	0	0	0	0	0	0	0	0	0	FALSE
64149	C17orf75	0	0	0	0	0	0	0	0	0	0	0	0	0	0	0	0	0	0	FALSE
284099	C17orf78	0	0	0	0	0	0	0	0	0	0	0	0	0	0	0	0	0	0	FALSE
55028	C17orf80	0	0	0	0	0	0	0	0	0	0	0	0	0	0	0	0	0	0	FALSE
100141515	C17orf99	0	0	0	0	0	0	0	0	0	0	0	0	0	0	0	0	0	0	FALSE
147339	C18orf25	0	0	0	0	0	0	0	0	0	0	0	0	0	0	0	0	0	0	FALSE
83636	C19orf12	0	0	0	0	0	0	0	0	0	0	0	0	0	0	0	0	0	0	FALSE
147685	C19orf18	0	0	0	0	0	0	0	0	0	0	0	0	0	0	0	0	0	0	FALSE
28974	C19orf53	0	0	1	0	0	0	1	0	0	1	0	1	0	0	0	1	0	5	FALSE
10438	C1D	0	0	0	0	0	0	0	0	0	0	0	0	0	0	0	0	0	0	FALSE
56913	C1GALT1	0	0	0	0	0	0	0	0	0	0	0	0	0	0	0	0	0	0	FALSE
29071	C1GALT1C1	0	0	0	0	0	0	0	0	0	0	0	0	0	0	0	0	0	0	FALSE
712	C1QA	0	0	0	0	0	0	0	0	0	0	0	0	0	0	0	0	0	0	FALSE
713	C1QB	0	0	0	0	0	0	0	0	0	0	0	0	0	0	0	0	0	0	FALSE
708	C1QBP	0	1	0	0	0	0	0	0	0	0	0	0	0	0	0	0	0	1	FALSE
714	C1QC	0	0	0	0	0	0	0	0	0	0	0	0	0	0	0	0	0	0	FALSE
10882	C1QL1	0	0	0	0	0	0	0	0	0	0	0	0	0	0	0	0	0	0	FALSE
165257	C1QL2	0	0	0	0	0	0	0	0	0	0	0	0	0	0	0	0	0	0	FALSE
389941	C1QL3	0	0	0	0	0	0	0	0	0	0	0	0	0	0	0	0	0	0	FALSE
338761	C1QL4	0	0	0	0	0	0	0	0	0	0	0	0	0	0	0	0	0	0	FALSE
114897	C1QTNF1	0	0	0	0	0	0	0	0	0	0	0	0	0	0	0	0	0	0	FALSE
388581	C1QTNF12	0	0	0	0	0	0	0	0	0	0	0	0	0	0	0	0	0	0	FALSE
114898	C1QTNF2	0	0	0	0	0	0	0	0	0	0	0	0	0	0	0	0	0	0	FALSE
114899	C1QTNF3	0	0	0	0	0	0	0	0	0	0	0	0	0	0	0	0	0	0	FALSE
114904	C1QTNF6	0	0	0	0	0	0	0	0	0	0	0	0	0	0	0	0	0	0	FALSE
114905	C1QTNF7	0	0	0	0	0	0	0	0	0	0	0	0	0	0	0	0	0	0	FALSE
390664	C1QTNF8	0	0	0	0	0	0	0	0	0	0	0	0	0	0	0	0	0	0	FALSE
338872	C1QTNF9	0	0	0	0	0	0	0	0	0	0	0	0	0	0	0	0	0	0	FALSE
387911	C1QTNF9B	0	0	0	0	0	0	0	0	0	0	0	0	0	0	0	0	0	0	FALSE
51279	C1RL	0	0	0	0	0	0	0	0	0	0	0	0	0	0	0	0	0	0	FALSE
716	C1S	0	0	0	0	0	0	0	0	0	0	0	0	0	0	0	0	0	0	FALSE
200159	C1orf100	0	0	0	0	0	0	0	0	0	0	0	0	0	0	0	0	0	0	FALSE
92346	C1orf105	0	0	0	0	0	0	0	0	0	0	0	0	0	0	0	0	0	0	FALSE
54955	C1orf109	1	1	1	1	1	1	1	1	1	1	1	1	1	1	1	1	1	17	TRUE
79762	C1orf115	0	0	0	0	0	0	0	0	0	0	0	0	0	0	0	0	0	0	FALSE
79098	C1orf116	0	0	0	0	0	0	0	0	0	0	0	0	0	0	0	0	0	0	FALSE
127687	C1orf122	0	0	0	0	0	0	0	0	0	0	0	0	0	0	0	0	0	0	FALSE
54987	CZIB	0	0	0	0	0	0	0	0	0	0	0	0	0	0	0	0	0	0	FALSE
128061	C1orf131	0	0	0	0	0	0	0	0	0	0	0	0	0	0	0	0	0	0	FALSE
400757	C1orf141	0	0	0	0	0	0	0	0	0	0	0	0	0	0	0	0	0	0	FALSE
388649	C1orf146	0	0	0	0	0	0	0	0	0	0	0	0	0	0	0	0	0	0	FALSE
93190	C1orf158	0	0	0	0	0	0	0	0	0	0	0	0	0	0	0	0	0	0	FALSE
54991	C1orf159	0	0	0	0	0	0	0	0	0	0	0	0	0	0	0	0	0	0	FALSE
128346	C1orf162	0	0	0	0	0	0	0	0	0	0	0	0	0	0	0	0	0	0	FALSE
339448	C1orf174	0	0	0	0	0	0	0	0	0	0	0	0	0	0	0	0	0	0	FALSE
84886	C1orf198	0	0	0	0	0	0	0	0	0	0	0	0	0	0	0	0	0	0	FALSE
81563	C1orf21	0	0	0	0	0	0	0	0	0	0	0	0	0	0	0	0	0	0	FALSE
79169	C1orf35	0	0	0	0	0	0	0	0	0	0	0	0	0	0	0	0	0	0	FALSE
25912	C1orf43	0	0	0	0	0	0	0	0	0	0	0	0	0	0	0	0	0	0	FALSE
388722	C1orf53	0	0	0	0	0	0	0	0	0	0	0	0	0	0	0	0	0	0	FALSE
79630	C1orf54	0	0	0	0	0	0	0	0	0	0	0	0	0	0	0	0	0	0	FALSE
54964	C1orf56	0	0	0	0	0	0	0	0	0	0	0	0	0	0	0	0	0	0	FALSE
148304	C1orf74	0	0	0	0	0	0	0	0	0	0	0	0	0	0	0	0	0	0	FALSE
127795	C1orf87	0	0	0	0	0	0	0	0	0	0	0	0	0	0	0	0	0	0	FALSE
717	C2	0	0	0	0	0	0	0	0	0	0	0	0	0	0	0	0	0	0	FALSE
140873	C20orf173	0	0	0	0	0	0	0	0	0	0	0	0	0	0	0	0	0	0	FALSE
400831	C20orf202	0	0	0	0	0	0	0	0	0	0	0	0	0	0	0	0	0	0	FALSE
128602	C20orf85	0	0	0	0	0	0	0	0	0	0	0	0	0	0	0	0	0	0	FALSE
54058	C21orf58	0	0	0	0	0	0	0	0	0	0	0	0	0	0	0	0	0	0	FALSE
56245	C21orf62	0	0	0	0	0	0	0	0	0	0	0	0	0	0	0	0	0	0	FALSE
54149	C21orf91	0	0	0	0	0	0	0	0	0	0	0	0	0	0	0	0	0	0	FALSE
84645	C22orf23	0	0	0	0	0	0	0	0	0	0	0	0	0	0	0	0	0	0	FALSE
25770	C22orf31	0	0	0	0	0	0	0	0	0	0	0	0	0	0	0	0	0	0	FALSE
79640	C22orf46	0	0	0	0	0	0	0	0	0	0	0	0	0	0	0	0	0	0	FALSE
25966	C2CD2	0	0	0	0	0	0	0	0	0	0	0	0	0	0	0	0	0	0	FALSE
9854	C2CD2L	0	0	0	0	0	0	0	0	0	0	0	0	0	0	0	0	0	0	FALSE
9847	C2CD5	0	0	0	0	0	0	0	0	0	0	0	0	0	0	0	0	0	0	FALSE
151254	C2CD6	0	0	0	0	0	0	0	0	0	0	0	0	0	0	0	0	0	0	FALSE
150590	C2orf15	0	0	0	0	0	0	0	0	0	0	0	0	0	0	0	0	0	0	FALSE
84226	C2orf16	0	0	0	0	0	0	0	0	0	0	0	0	0	0	0	0	0	0	FALSE
84417	ECRG4	0	0	0	0	0	0	0	0	0	0	0	0	0	0	0	0	0	0	FALSE
79074	C2orf49	0	0	0	0	0	0	0	0	0	0	0	0	0	0	0	0	0	0	FALSE
130813	C2orf50	0	0	0	0	0	0	0	0	0	0	0	0	0	0	0	0	0	0	FALSE
401027	C2orf66	0	0	0	0	0	0	0	0	0	0	0	0	0	0	0	0	0	0	FALSE
205327	C2orf69	0	0	0	0	0	0	0	0	0	0	0	0	0	0	0	0	0	0	FALSE
129852	C2orf73	0	0	0	0	0	0	0	0	0	0	0	0	0	0	0	0	0	0	FALSE
130355	C2orf76	0	0	0	0	0	0	0	0	0	0	0	0	0	0	0	0	0	0	FALSE
718	C3	0	0	0	0	0	0	0	0	0	0	0	0	0	0	0	0	0	0	FALSE
719	C3AR1	0	0	0	0	0	0	0	0	0	0	0	0	0	0	0	0	0	0	FALSE
152405	TEX55	0	0	0	0	0	0	0	0	0	0	0	0	0	0	0	0	0	0	FALSE
285315	C3orf33	0	0	0	0	0	0	0	0	0	0	0	0	0	0	0	0	0	0	FALSE
285237	C3orf38	0	0	0	0	0	0	0	0	0	0	0	0	0	0	0	0	0	0	FALSE
79669	C3orf52	0	0	0	0	0	0	0	0	0	0	0	0	0	0	0	0	0	0	FALSE
205428	DIPK2A	0	0	0	0	0	0	0	0	0	0	0	0	0	0	0	0	0	0	FALSE
200844	C3orf67	0	0	0	0	0	0	0	0	0	0	0	0	0	0	0	0	0	0	FALSE
401097	C3orf80	0	0	0	0	0	0	0	0	0	0	0	0	0	0	0	0	0	0	FALSE
722	C4BPA	0	0	0	0	0	0	0	0	0	0	0	0	0	0	0	0	0	0	FALSE
725	C4BPB	0	0	0	0	0	0	0	0	0	0	0	0	0	0	0	0	0	0	FALSE
132321	C4orf33	0	0	0	0	0	0	0	0	0	0	0	0	0	0	0	0	0	0	FALSE
132989	C4orf36	0	0	0	0	0	0	0	0	0	0	0	0	0	0	0	0	0	0	FALSE
152940	C4orf45	0	0	0	0	0	0	0	0	0	0	0	0	0	0	0	0	0	0	FALSE
401115	C4orf48	0	0	0	0	0	0	0	0	0	0	0	0	0	0	0	0	0	0	FALSE
727	C5	0	0	0	0	0	0	0	0	0	0	0	0	0	0	0	0	0	0	FALSE
728	C5AR1	0	0	0	0	0	0	0	0	0	0	0	0	0	0	0	0	0	0	FALSE
27202	C5AR2	0	0	0	0	0	0	0	0	0	0	0	0	0	0	0	0	0	0	FALSE
56951	C5orf15	0	0	0	0	0	0	0	0	0	0	0	0	0	0	0	0	0	0	FALSE
55322	C5orf22	0	0	0	0	0	0	0	0	0	0	0	0	0	0	0	0	0	0	FALSE
134553	C5orf24	0	0	0	0	0	0	0	0	0	0	0	0	0	0	0	0	0	0	FALSE
375444	C5orf34	0	0	0	0	0	0	0	0	0	0	0	0	0	0	0	0	0	0	FALSE
389336	C5orf46	0	0	0	0	0	0	0	0	0	0	0	0	0	0	0	0	0	0	FALSE
133491	C5orf47	0	0	0	0	0	0	0	0	0	0	0	0	0	0	0	0	0	0	FALSE
285636	C5orf51	0	0	0	0	0	0	0	0	0	0	0	0	0	0	0	0	0	0	FALSE
100190949	C5orf52	0	0	0	0	0	0	0	0	0	0	0	0	0	0	0	0	0	0	FALSE
729	C6	0	0	0	0	0	0	0	0	0	0	0	0	0	0	0	0	0	0	FALSE
10665	TSBP1	0	0	0	0	0	0	0	0	0	0	0	0	0	0	0	0	0	0	FALSE
64771	ILRUN	0	0	0	0	0	0	0	0	0	0	0	0	0	0	0	0	0	0	FALSE
168090	C6orf118	0	0	0	0	0	0	0	0	0	0	0	0	0	0	0	0	0	0	FALSE
221545	C6orf136	0	0	0	0	0	0	0	0	0	0	0	0	0	0	0	0	0	0	FALSE
29113	C6orf15	0	0	0	0	0	0	0	0	0	0	0	0	0	0	0	0	0	0	FALSE
206412	C6orf163	0	0	0	0	0	0	0	0	0	0	0	0	0	0	0	0	0	0	FALSE
404220	C6orf201	0	0	0	0	0	0	0	0	0	0	0	0	0	0	0	0	0	0	FALSE
221416	C6orf223	0	0	0	0	0	0	0	0	0	0	0	0	0	0	0	0	0	0	FALSE
50854	SNHG32	0	0	0	0	0	0	0	0	0	0	0	0	0	0	0	0	0	0	FALSE
347744	C6orf52	0	0	0	0	0	0	0	0	0	0	0	0	0	0	0	0	0	0	FALSE
352999	C6orf58	0	0	0	0	0	0	0	0	0	0	0	0	0	0	0	0	0	0	FALSE
81688	C6orf62	0	0	0	0	0	0	0	0	0	0	0	0	0	0	0	0	0	0	FALSE
221477	C6orf89	0	0	0	0	0	0	0	0	0	0	0	0	0	0	0	0	0	0	FALSE
730	C7	0	0	0	0	0	0	0	0	0	0	0	0	0	0	0	0	0	0	FALSE
136895	C7orf31	0	0	0	0	0	0	0	0	0	0	0	0	0	0	0	0	0	0	FALSE
55262	MAP11	0	0	0	0	0	0	0	0	0	0	0	0	0	0	0	0	0	0	FALSE
136288	C7orf57	0	0	0	0	0	0	0	0	0	0	0	0	0	0	0	0	0	0	FALSE
731	C8A	0	0	0	0	0	0	0	0	0	0	0	0	0	0	0	0	0	0	FALSE
732	C8B	0	0	0	0	0	0	0	0	0	0	0	0	0	0	0	0	0	0	FALSE
733	C8G	0	0	0	0	0	0	0	0	0	0	0	0	0	0	0	0	0	0	FALSE
65265	C8orf33	0	0	0	0	0	0	0	0	0	0	0	0	0	0	0	0	0	0	FALSE
116328	C8orf34	0	0	0	0	0	0	0	0	0	0	0	0	0	0	0	0	0	0	FALSE
157657	C8orf37	0	0	0	0	0	0	0	0	0	0	0	0	0	0	0	0	0	0	FALSE
56260	C8orf44	0	0	0	0	0	0	0	0	0	0	0	0	0	0	0	0	0	0	FALSE
157773	C8orf48	0	0	0	0	0	0	0	0	0	0	0	0	0	0	0	0	0	0	FALSE
414919	C8orf82	0	0	0	0	0	0	0	0	0	0	0	0	0	0	0	0	0	0	FALSE
389649	C8orf86	0	0	0	0	0	0	0	0	0	0	0	0	0	0	0	0	0	0	FALSE
735	C9	0	0	0	0	0	0	0	0	0	0	0	0	0	0	0	0	0	0	FALSE
138724	C9orf131	0	0	0	0	0	0	0	0	0	0	0	0	0	0	0	0	0	0	FALSE
138255	C9orf135	0	0	0	0	0	0	0	0	0	0	0	0	0	0	0	0	0	0	FALSE
401546	C9orf152	0	0	0	0	0	0	0	0	0	0	0	0	0	0	0	0	0	0	FALSE
84688	C9orf24	0	0	0	0	0	0	0	0	0	0	0	0	0	0	0	0	0	0	FALSE
84909	AOPEP	0	0	0	0	0	0	0	0	0	0	0	0	0	0	0	0	0	0	FALSE
55071	C9orf40	0	0	0	0	0	0	0	0	0	0	0	0	0	0	0	0	0	0	FALSE
257169	C9orf43	0	0	0	0	0	0	0	0	0	0	0	0	0	0	0	0	0	0	FALSE
157983	DOCK8-AS1	0	0	0	0	0	0	0	0	0	0	0	0	0	0	0	0	0	0	FALSE
203228	C9orf72	0	0	0	0	0	0	0	0	0	0	0	0	0	0	0	0	0	0	FALSE
138241	C9orf85	0	0	0	0	0	0	0	0	0	0	0	0	0	0	0	0	0	0	FALSE
759	CA1	0	0	0	0	0	0	0	0	0	0	0	0	0	0	0	0	0	0	FALSE
56934	CA10	0	0	0	0	0	0	0	0	0	0	0	0	0	0	0	0	0	0	FALSE
770	CA11	0	0	0	0	0	0	0	0	0	0	0	0	0	0	0	0	0	0	FALSE
771	CA12	0	0	0	0	0	0	0	0	0	0	0	0	0	0	0	0	0	0	FALSE
377677	CA13	0	0	0	0	0	0	0	0	0	0	0	0	0	0	0	0	0	0	FALSE
23632	CA14	0	0	0	0	0	0	0	0	0	0	0	0	0	0	0	0	0	0	FALSE
760	CA2	0	0	0	0	0	0	0	0	0	0	0	0	0	0	0	0	0	0	FALSE
761	CA3	0	0	0	0	0	0	0	0	0	0	0	0	0	0	0	0	0	0	FALSE
762	CA4	0	0	0	0	0	0	0	0	0	0	0	0	0	0	0	0	0	0	FALSE
763	CA5A	0	0	0	0	0	0	0	0	0	0	0	0	0	0	0	0	0	0	FALSE
11238	CA5B	0	0	0	0	0	0	0	0	0	0	0	0	0	0	0	0	0	0	FALSE
765	CA6	0	0	0	0	0	0	0	0	0	0	0	0	0	0	0	0	0	0	FALSE
766	CA7	0	0	0	0	0	0	0	0	0	0	0	0	0	0	0	0	0	0	FALSE
767	CA8	0	0	0	0	0	0	0	0	0	0	0	0	0	0	0	0	0	0	FALSE
768	CA9	0	0	0	0	0	0	0	0	0	0	0	0	0	0	0	0	0	0	FALSE
51719	CAB39	0	0	0	0	0	0	0	0	0	0	0	0	0	0	0	0	0	0	FALSE
81617	CAB39L	0	0	0	0	0	0	0	0	0	0	0	0	0	0	0	0	0	0	FALSE
23523	CABIN1	0	0	0	0	0	0	0	0	0	0	0	0	0	0	0	0	0	0	FALSE
81928	CABLES2	0	0	0	0	0	0	0	0	0	0	0	0	0	0	0	0	0	0	FALSE
9478	CABP1	0	0	0	0	0	0	0	0	0	0	0	0	0	0	0	0	0	0	FALSE
51475	CABP2	0	0	0	0	0	0	0	0	0	0	0	0	0	0	0	0	0	0	FALSE
57010	CABP4	0	0	0	0	0	0	0	0	0	0	0	0	0	0	0	0	0	0	FALSE
56344	CABP5	0	0	0	0	0	0	0	0	0	0	0	0	0	0	0	0	0	0	FALSE
164633	CABP7	0	0	0	0	0	0	0	0	0	0	0	0	0	0	0	0	0	0	FALSE
85438	CABS1	0	0	0	0	0	0	0	0	0	0	0	0	0	0	0	0	0	0	FALSE
26256	CABYR	0	0	0	0	0	0	0	0	0	0	0	0	0	0	0	0	0	0	FALSE
11094	CACFD1	0	0	0	0	0	0	0	0	0	0	0	0	0	0	0	0	0	0	FALSE
57685	CACHD1	0	0	0	0	0	0	0	0	0	0	0	0	0	0	0	0	0	0	FALSE
773	CACNA1A	0	0	0	0	0	0	0	0	0	0	0	0	0	0	0	0	0	0	FALSE
774	CACNA1B	0	0	0	0	0	0	0	0	0	0	0	0	0	0	0	0	0	0	FALSE
775	CACNA1C	0	0	0	0	0	0	0	0	0	0	0	0	0	0	0	0	0	0	FALSE
776	CACNA1D	0	0	0	0	0	0	0	0	0	0	0	0	0	0	0	0	0	0	FALSE
777	CACNA1E	0	0	0	0	0	0	0	0	0	0	0	0	0	0	0	0	0	0	FALSE
778	CACNA1F	0	0	0	0	0	0	0	0	0	0	0	0	0	0	0	0	0	0	FALSE
8913	CACNA1G	0	0	0	0	0	0	0	0	0	0	0	0	0	0	0	0	0	0	FALSE
8912	CACNA1H	0	0	0	0	0	0	0	0	0	0	0	0	0	0	0	0	0	0	FALSE
8911	CACNA1I	0	0	0	0	0	0	0	0	0	0	0	0	0	0	0	0	0	0	FALSE
779	CACNA1S	0	0	0	0	0	0	0	0	0	0	0	0	0	0	0	0	0	0	FALSE
781	CACNA2D1	0	0	0	0	0	0	0	0	0	0	0	0	0	0	0	0	0	0	FALSE
9254	CACNA2D2	0	0	0	0	0	0	0	0	0	0	0	0	0	0	0	0	0	0	FALSE
55799	CACNA2D3	0	0	0	0	0	0	0	0	0	0	0	0	0	0	0	0	0	0	FALSE
93589	CACNA2D4	0	0	0	0	0	0	0	0	0	0	0	0	0	0	0	0	0	0	FALSE
782	CACNB1	0	0	0	0	0	0	0	0	0	0	0	0	0	0	0	0	0	0	FALSE
783	CACNB2	0	0	0	0	0	0	0	0	0	0	0	0	0	0	0	0	0	0	FALSE
784	CACNB3	0	0	0	0	0	0	0	0	0	0	0	0	0	0	0	0	0	0	FALSE
785	CACNB4	0	0	0	0	0	0	0	0	0	0	0	0	0	0	0	0	0	0	FALSE
786	CACNG1	0	0	0	0	0	0	0	0	0	0	0	0	0	0	0	0	0	0	FALSE
10369	CACNG2	0	0	0	0	0	0	0	0	0	0	0	0	0	0	0	0	0	0	FALSE
10368	CACNG3	0	0	0	0	0	0	0	0	0	0	0	0	0	0	0	0	0	0	FALSE
27092	CACNG4	0	0	0	0	0	0	0	0	0	0	0	0	0	0	0	0	0	0	FALSE
27091	CACNG5	0	0	0	0	0	0	0	0	0	0	0	0	0	0	0	0	0	0	FALSE
59285	CACNG6	0	0	0	0	0	0	0	0	0	0	0	0	0	0	0	0	0	0	FALSE
59284	CACNG7	0	0	0	0	0	0	0	0	0	0	0	0	0	0	0	0	0	0	FALSE
59283	CACNG8	0	0	0	0	0	0	0	0	0	0	0	0	0	0	0	0	0	0	FALSE
143384	CACUL1	0	0	0	0	0	0	0	0	0	0	0	0	0	0	0	0	0	0	FALSE
27101	CACYBP	0	0	0	0	0	0	0	0	0	0	0	0	0	0	0	0	0	0	FALSE
790	CAD	0	0	0	0	0	0	0	1	0	1	1	0	0	0	0	0	0	3	FALSE
23705	CADM1	0	0	0	0	0	0	0	0	0	0	0	0	0	0	0	0	0	0	FALSE
253559	CADM2	0	0	0	0	0	0	0	0	0	0	0	0	0	0	0	0	0	0	FALSE
57863	CADM3	0	0	0	0	0	0	0	0	0	0	0	0	0	0	0	0	0	0	FALSE
199731	CADM4	0	0	0	0	0	0	0	0	0	0	0	0	0	0	0	0	0	0	FALSE
8618	CADPS	0	0	0	0	0	0	0	0	0	0	0	0	0	0	0	0	0	0	FALSE
93664	CADPS2	0	0	0	0	0	0	0	0	0	0	0	0	0	0	0	0	0	0	FALSE
285782	CAGE1	0	0	0	0	0	0	0	0	0	0	0	0	0	0	0	0	0	0	FALSE
793	CALB1	0	0	0	0	0	0	0	0	0	0	0	0	0	0	0	0	0	0	FALSE
794	CALB2	0	0	0	0	0	0	0	0	0	0	0	0	0	0	0	0	0	0	FALSE
796	CALCA	0	0	0	0	0	0	0	0	0	0	0	0	0	0	0	0	0	0	FALSE
797	CALCB	0	0	0	0	0	0	0	0	0	0	0	0	0	0	0	0	0	0	FALSE
10241	CALCOCO2	0	0	0	0	0	0	0	0	0	0	0	0	0	0	0	0	0	0	FALSE
799	CALCR	0	0	0	0	0	0	0	0	0	0	0	0	0	0	0	0	0	0	FALSE
10203	CALCRL	0	0	0	0	0	0	0	0	0	0	0	0	0	0	0	0	0	0	FALSE
800	CALD1	0	0	0	0	0	0	0	0	0	0	0	0	0	0	0	0	0	0	FALSE
255022	CALHM1	0	0	0	0	0	0	0	0	0	0	0	0	0	0	0	0	0	0	FALSE
119395	CALHM3	0	0	0	0	0	0	0	0	0	0	0	0	0	0	0	0	0	0	FALSE
221301	CALHM4	0	0	0	0	0	0	0	0	0	0	0	0	0	0	0	0	0	0	FALSE
254228	CALHM5	0	0	0	0	0	0	0	0	0	0	0	0	0	0	0	0	0	0	FALSE
801	CALM1	0	0	0	0	0	0	0	0	0	0	0	0	0	0	0	0	0	0	FALSE
805	CALM2	0	0	0	0	0	0	0	0	0	0	0	0	0	0	0	0	0	0	FALSE
808	CALM3	0	0	0	0	0	0	0	0	0	0	0	0	0	0	0	0	0	0	FALSE
91860	CALML4	0	0	0	0	0	0	0	0	0	0	0	0	0	0	0	0	0	0	FALSE
51806	CALML5	0	0	0	0	0	0	0	0	0	0	0	0	0	0	0	0	0	0	FALSE
163688	CALML6	0	0	0	0	0	0	0	0	0	0	0	0	0	0	0	0	0	0	FALSE
83698	CALN1	0	0	0	0	0	0	0	0	0	0	0	0	0	0	0	0	0	0	FALSE
811	CALR	0	0	0	0	0	0	0	0	0	0	0	0	0	0	0	0	0	0	FALSE
125972	CALR3	0	0	0	0	0	0	0	0	0	0	0	0	0	0	0	0	0	0	FALSE
813	CALU	0	0	0	0	0	0	0	0	0	0	0	0	0	0	0	0	0	0	FALSE
50632	CALY	0	0	0	0	0	0	0	0	0	0	0	0	0	0	0	0	0	0	FALSE
8536	CAMK1	0	0	0	0	0	0	0	0	0	0	0	0	0	0	0	0	0	0	FALSE
57118	CAMK1D	0	0	0	0	0	0	0	0	0	0	0	0	0	0	0	0	0	0	FALSE
57172	CAMK1G	0	0	0	0	0	0	0	0	0	0	0	0	0	0	0	0	0	0	FALSE
815	CAMK2A	0	0	0	0	0	0	0	0	0	0	0	0	0	0	0	0	0	0	FALSE
816	CAMK2B	0	0	0	0	0	0	0	0	0	0	0	0	0	0	0	0	0	0	FALSE
817	CAMK2D	0	0	0	0	0	0	0	0	0	0	0	0	0	0	0	0	0	0	FALSE
818	CAMK2G	0	0	0	0	0	0	0	0	0	0	0	0	0	0	0	0	0	0	FALSE
55450	CAMK2N1	0	0	0	0	0	0	0	0	0	0	0	0	0	0	0	0	0	0	FALSE
814	CAMK4	0	0	0	0	0	0	0	0	0	0	0	0	0	0	0	0	0	0	FALSE
84254	CAMKK1	0	0	0	0	0	0	0	0	0	0	0	0	0	0	0	0	0	0	FALSE
10645	CAMKK2	0	0	0	0	0	0	0	0	0	0	0	0	0	0	0	0	0	0	FALSE
79823	CAMKMT	0	0	0	0	0	0	0	0	0	0	0	0	0	0	0	0	0	0	FALSE
79012	CAMKV	0	0	0	0	0	0	0	0	0	0	0	0	0	0	0	0	0	0	FALSE
819	CAMLG	0	0	0	0	0	0	0	0	0	0	0	0	0	0	0	0	0	0	FALSE
820	CAMP	0	0	0	0	0	0	0	0	0	0	0	0	0	0	0	0	0	0	FALSE
23261	CAMTA1	0	0	0	0	0	0	0	0	0	0	0	0	0	0	0	0	0	0	FALSE
23125	CAMTA2	0	0	0	0	0	0	0	0	0	0	0	0	0	0	0	0	0	0	FALSE
55832	CAND1	0	0	0	0	0	0	0	0	0	1	0	0	0	0	0	0	0	1	FALSE
23066	CAND2	0	0	0	0	0	0	0	0	0	0	0	0	0	0	0	0	0	0	FALSE
124583	CANT1	0	0	0	0	0	0	0	0	0	0	0	0	0	0	0	0	0	0	FALSE
821	CANX	0	0	0	0	0	0	0	0	0	0	0	0	0	0	0	0	0	0	FALSE
10487	CAP1	0	0	0	0	0	0	0	0	0	0	0	0	0	0	0	0	0	0	FALSE
10486	CAP2	0	0	0	0	0	0	0	0	0	0	0	0	0	0	0	0	0	0	FALSE
822	CAPG	0	0	0	0	0	0	0	0	0	0	0	0	0	0	0	0	0	0	FALSE
823	CAPN1	0	0	0	0	0	0	0	0	0	0	0	0	0	0	0	0	0	0	FALSE
11132	CAPN10	0	0	0	0	0	0	0	0	0	0	0	0	0	0	0	0	0	0	FALSE
11131	CAPN11	0	0	0	0	0	0	0	0	0	0	0	0	0	0	0	0	0	0	FALSE
147968	CAPN12	0	0	0	0	0	0	0	0	0	0	0	0	0	0	0	0	0	0	FALSE
92291	CAPN13	0	0	0	0	0	0	0	0	0	0	0	0	0	0	0	0	0	0	FALSE
6650	CAPN15	0	0	0	0	0	0	0	0	0	0	0	0	0	0	0	0	0	0	FALSE
824	CAPN2	0	0	0	0	0	0	0	0	0	0	0	0	0	0	0	0	0	0	FALSE
825	CAPN3	0	0	0	0	0	0	0	0	0	0	0	0	0	0	0	0	0	0	FALSE
726	CAPN5	0	0	0	0	0	0	0	0	0	0	0	0	0	0	0	0	0	0	FALSE
827	CAPN6	0	0	0	0	0	0	0	0	0	0	0	0	0	0	0	0	0	0	FALSE
23473	CAPN7	0	0	0	0	0	0	0	0	0	0	0	0	0	0	0	0	0	0	FALSE
10753	CAPN9	0	0	0	0	0	0	0	0	0	0	0	0	0	0	0	0	0	0	FALSE
826	CAPNS1	0	0	0	0	0	0	0	0	0	0	0	0	0	0	0	0	0	0	FALSE
84290	CAPNS2	0	0	0	0	0	0	0	0	0	0	0	0	0	0	0	0	0	0	FALSE
4076	CAPRIN1	0	0	0	0	0	0	0	0	0	0	0	0	0	0	0	0	0	0	FALSE
65981	CAPRIN2	0	0	0	0	0	0	0	0	0	0	0	0	0	0	0	0	0	0	FALSE
828	CAPS	0	0	0	0	0	0	0	0	0	0	0	0	0	0	0	0	0	0	FALSE
84698	CAPS2	0	0	0	0	0	0	0	0	0	0	0	0	0	0	0	0	0	0	FALSE
829	CAPZA1	0	0	0	0	0	0	0	0	0	0	0	0	0	0	0	0	0	0	FALSE
830	CAPZA2	0	0	0	0	0	0	0	0	0	0	0	0	0	0	0	0	0	0	FALSE
93661	CAPZA3	0	0	0	0	0	0	0	0	0	0	0	0	0	0	0	0	0	0	FALSE
832	CAPZB	1	1	1	1	1	1	1	1	1	1	1	1	1	1	1	1	1	17	TRUE
29775	CARD10	0	0	0	0	0	0	0	0	0	0	0	0	0	0	0	0	0	0	FALSE
84433	CARD11	0	0	0	0	0	0	0	0	0	0	0	0	0	0	0	0	0	0	FALSE
79092	CARD14	0	0	0	0	0	0	0	0	0	0	0	0	0	0	0	0	0	0	FALSE
114769	CARD16	0	0	0	0	0	0	0	0	0	0	0	0	0	0	0	0	0	0	FALSE
440068	CARD17	0	0	0	0	0	0	0	0	0	0	0	0	0	0	0	0	0	0	FALSE
59082	CARD18	0	0	0	0	0	0	0	0	0	0	0	0	0	0	0	0	0	0	FALSE
84674	CARD6	0	0	0	0	0	0	0	0	0	0	0	0	0	0	0	0	0	0	FALSE
22900	CARD8	0	0	0	0	0	0	0	0	0	0	0	0	0	0	0	0	0	0	FALSE
64170	CARD9	0	0	0	0	0	0	0	0	0	0	0	0	0	0	0	0	0	0	FALSE
79800	CARF	0	0	0	0	0	0	0	0	0	0	0	0	0	0	0	0	0	0	FALSE
23589	CARHSP1	0	0	0	0	0	0	0	0	0	0	0	0	0	0	0	0	0	0	FALSE
10498	CARM1	0	0	0	0	0	0	0	0	0	0	0	0	0	0	0	0	0	0	FALSE
55604	CARMIL1	0	0	0	0	0	0	0	0	0	0	0	0	0	0	0	0	0	0	FALSE
146206	CARMIL2	0	0	0	0	0	0	0	0	0	0	0	0	0	0	0	0	0	0	FALSE
833	CARS	1	1	1	1	1	1	1	1	1	1	1	1	1	1	1	1	1	17	TRUE
79587	CARS2	0	0	0	0	0	0	0	0	0	0	0	0	0	0	0	0	0	0	FALSE
9607	CARTPT	0	0	0	0	0	0	0	0	0	0	0	0	0	0	0	0	0	0	FALSE
55259	CASC1	0	0	0	0	0	0	0	0	0	0	0	0	0	0	0	0	0	0	FALSE
22794	CASC3	0	0	0	0	0	0	0	0	0	0	0	0	0	0	0	0	0	0	FALSE
113201	CASC4	0	0	0	0	0	0	0	0	0	0	0	0	0	0	0	0	0	0	FALSE
64921	CASD1	0	0	0	0	0	0	0	0	0	0	0	0	0	0	0	0	0	0	FALSE
8573	CASK	0	0	0	0	0	0	0	0	0	0	0	0	0	0	0	0	0	0	FALSE
57524	CASKIN1	0	0	0	0	0	0	0	0	0	0	0	0	0	0	0	0	0	0	FALSE
57513	CASKIN2	0	0	0	0	0	0	0	0	0	0	0	0	0	0	0	0	0	0	FALSE
834	CASP1	0	0	0	0	0	0	0	0	0	0	0	0	0	0	0	0	0	0	FALSE
843	CASP10	0	0	0	0	0	0	0	0	0	0	0	0	0	0	0	0	0	0	FALSE
23581	CASP14	0	0	0	0	0	0	0	0	0	0	0	0	0	0	0	0	0	0	FALSE
835	CASP2	0	0	0	0	0	0	0	0	0	0	0	0	0	0	0	0	0	0	FALSE
836	CASP3	0	0	0	0	0	0	0	0	0	0	0	0	0	0	0	0	0	0	FALSE
837	CASP4	0	0	0	0	0	0	0	0	0	0	0	0	0	0	0	0	0	0	FALSE
838	CASP5	0	0	0	0	0	0	0	0	0	0	0	0	0	0	0	0	0	0	FALSE
839	CASP6	0	0	0	0	0	0	0	0	0	0	0	0	0	0	0	0	0	0	FALSE
840	CASP7	0	0	0	0	0	0	0	0	0	0	0	0	0	0	0	0	0	0	FALSE
841	CASP8	0	0	0	0	0	0	0	0	0	0	0	0	0	0	0	0	0	0	FALSE
842	CASP9	0	0	0	0	0	0	0	0	0	0	0	0	0	0	0	0	0	0	FALSE
844	CASQ1	0	0	0	0	0	0	0	0	0	0	0	0	0	0	0	0	0	0	FALSE
845	CASQ2	0	0	0	0	0	0	0	0	0	0	0	0	0	0	0	0	0	0	FALSE
846	CASR	0	0	0	0	0	0	0	0	0	0	0	0	0	0	0	0	0	0	FALSE
831	CAST	0	0	0	0	0	0	0	0	0	0	0	0	0	0	0	0	0	0	FALSE
729438	CASTOR2	0	0	0	0	0	0	0	0	0	0	0	0	0	0	0	0	0	0	FALSE
352954	CASTOR3	0	0	0	0	0	0	0	0	0	0	0	0	0	0	0	0	0	0	FALSE
54897	CASZ1	0	0	0	0	0	0	0	0	0	0	0	0	0	0	0	0	0	0	FALSE
847	CAT	0	0	0	0	0	0	0	0	0	0	0	0	0	0	0	0	0	0	FALSE
117144	CATSPER1	0	0	0	0	0	0	0	0	0	0	0	0	0	0	0	0	0	0	FALSE
347732	CATSPER3	0	0	0	0	0	0	0	0	0	0	0	0	0	0	0	0	0	0	FALSE
378807	CATSPER4	0	0	0	0	0	0	0	0	0	0	0	0	0	0	0	0	0	0	FALSE
79820	CATSPERB	0	0	0	0	0	0	0	0	0	0	0	0	0	0	0	0	0	0	FALSE
257062	CATSPERD	0	0	0	0	0	0	0	0	0	0	0	0	0	0	0	0	0	0	FALSE
257044	CATSPERE	0	0	0	0	0	0	0	0	0	0	0	0	0	0	0	0	0	0	FALSE
57828	CATSPERG	0	0	0	0	0	0	0	0	0	0	0	0	0	0	0	0	0	0	FALSE
857	CAV1	0	0	0	0	0	0	0	0	0	0	0	0	0	0	0	0	0	0	FALSE
858	CAV2	0	0	0	0	0	0	0	0	0	0	0	0	0	0	0	0	0	0	FALSE
859	CAV3	0	0	0	0	0	0	0	0	0	0	0	0	0	0	0	0	0	0	FALSE
284119	CAVIN1	0	0	0	0	0	0	0	0	0	0	0	0	0	0	0	0	0	0	FALSE
8436	CAVIN2	0	0	0	0	0	0	0	0	0	0	0	0	0	0	0	0	0	0	FALSE
112464	CAVIN3	0	0	0	0	0	0	0	0	0	0	0	0	0	0	0	0	0	0	FALSE
347273	CAVIN4	0	0	0	0	0	0	0	0	0	0	0	0	0	0	0	0	0	0	FALSE
9139	CBFA2T2	0	0	0	0	0	0	0	0	0	0	0	0	0	0	0	0	0	0	FALSE
863	CBFA2T3	0	0	0	0	0	0	0	0	0	0	0	0	0	0	0	0	0	0	FALSE
865	CBFB	0	0	0	0	0	0	0	1	0	0	1	0	0	0	0	0	0	2	FALSE
867	CBL	0	0	0	0	0	0	0	0	0	0	0	0	0	0	0	0	0	0	FALSE
868	CBLB	0	0	0	0	0	0	0	0	0	0	0	0	0	0	0	0	0	0	FALSE
23624	CBLC	0	0	0	0	0	0	0	0	0	0	0	0	0	0	0	0	0	0	FALSE
79872	CBLL1	0	0	0	0	0	0	0	0	0	0	0	0	0	0	0	0	0	0	FALSE
158506	CBLL2	0	0	0	0	0	0	0	0	0	0	0	0	0	0	0	0	0	0	FALSE
869	CBLN1	0	0	0	0	0	0	0	0	0	0	0	0	0	0	0	0	0	0	FALSE
147381	CBLN2	0	0	0	0	0	0	0	0	0	0	0	0	0	0	0	0	0	0	FALSE
643866	CBLN3	0	0	0	0	0	0	0	0	0	0	0	0	0	0	0	0	0	0	FALSE
140689	CBLN4	0	0	0	0	0	0	0	0	0	0	0	0	0	0	0	0	0	0	FALSE
873	CBR1	0	0	0	0	0	0	0	0	0	0	0	0	0	0	0	0	0	0	FALSE
874	CBR3	0	0	0	0	0	0	0	0	0	0	0	0	0	0	0	0	0	0	FALSE
84869	CBR4	0	0	0	0	0	0	0	0	0	0	0	0	0	0	0	0	0	0	FALSE
55871	CBWD1	0	0	0	0	0	0	0	0	0	0	0	0	0	0	0	0	0	0	FALSE
150472	CBWD2	0	0	0	0	0	0	0	0	0	1	0	0	0	0	0	0	0	1	FALSE
10951	CBX1	0	0	0	0	0	0	0	0	0	0	0	0	0	0	0	0	0	0	FALSE
84733	CBX2	0	0	0	0	0	0	0	0	0	0	0	0	0	0	0	0	0	0	FALSE
11335	CBX3	0	0	0	0	0	0	0	0	0	0	0	0	0	0	0	0	0	0	FALSE
8535	CBX4	0	0	0	0	0	0	0	0	0	0	0	0	0	0	0	0	0	0	FALSE
23468	CBX5	0	0	0	0	0	0	0	0	0	0	0	0	0	0	0	0	0	0	FALSE
23466	CBX6	0	0	0	0	0	0	0	0	0	0	0	0	0	0	0	0	0	0	FALSE
23492	CBX7	0	0	0	0	0	0	0	0	0	0	0	0	0	0	0	0	0	0	FALSE
57332	CBX8	0	0	0	0	0	0	0	0	0	0	0	0	0	0	0	0	0	0	FALSE
54862	CC2D1A	0	0	0	0	0	0	0	0	0	0	0	0	0	0	0	0	0	0	FALSE
55749	CCAR1	1	0	1	1	0	1	0	0	0	1	0	1	1	1	1	1	1	11	FALSE
57805	CCAR2	0	0	0	0	0	0	0	0	0	0	0	0	0	0	0	0	0	0	FALSE
147372	CCBE1	0	0	0	0	0	0	0	0	0	0	0	0	0	0	0	0	0	0	FALSE
79839	CCDC102B	0	0	0	0	0	0	0	0	0	0	0	0	0	0	0	0	0	0	FALSE
256309	CCDC110	0	0	0	0	0	0	0	0	0	0	0	0	0	0	0	0	0	0	FALSE
153733	CCDC112	0	0	0	0	0	0	0	0	0	0	0	0	0	0	0	0	0	0	FALSE
29070	CCDC113	0	0	0	0	0	0	0	0	0	0	0	0	0	0	0	0	0	0	FALSE
93233	CCDC114	0	0	0	0	0	0	0	0	0	0	0	0	0	0	0	0	0	0	FALSE
84317	CCDC115	0	1	1	1	0	1	0	1	0	1	1	0	1	1	1	1	0	11	FALSE
164592	CCDC116	0	0	0	0	0	0	0	0	0	0	0	0	0	0	0	0	0	0	FALSE
150275	CCDC117	0	0	0	0	0	0	0	0	0	0	0	0	0	0	0	0	0	0	FALSE
151903	CCDC12	0	0	0	0	0	0	0	0	0	0	0	0	0	0	0	0	0	0	FALSE
79635	CCDC121	0	0	0	0	0	0	0	0	0	0	0	0	0	0	0	0	0	0	FALSE
160857	CCDC122	0	0	0	0	0	0	0	0	0	0	0	0	0	0	0	0	0	0	FALSE
90693	CCDC126	0	0	0	0	0	0	0	0	0	0	0	0	0	0	0	0	0	0	FALSE
64753	CCDC136	0	0	0	0	0	0	0	0	0	0	0	0	0	0	0	0	0	0	FALSE
165055	CCDC138	0	0	0	0	0	0	0	0	0	0	0	0	0	0	0	0	0	0	FALSE
64770	CCDC14	0	0	0	0	0	0	0	0	0	0	0	0	0	0	0	0	0	0	FALSE
151278	CCDC140	0	0	0	0	0	0	0	0	0	0	0	0	0	0	0	0	0	0	FALSE
9720	CCDC144A	0	0	0	0	0	0	0	0	0	0	0	0	0	0	0	0	0	0	FALSE
339184	CCDC144NL	0	0	0	0	0	0	0	0	0	0	0	0	0	0	0	0	0	0	FALSE
57639	CCDC146	0	0	0	0	0	0	0	0	0	0	0	0	0	0	0	0	0	0	FALSE
130940	CCDC148	0	0	0	0	0	0	0	0	0	0	0	0	0	0	0	0	0	0	FALSE
91050	CCDC149	0	0	0	0	0	0	0	0	0	0	0	0	0	0	0	0	0	0	FALSE
284992	CCDC150	0	0	0	0	0	0	0	0	0	0	0	0	0	0	0	0	0	0	FALSE
115948	CCDC151	0	0	0	0	0	0	0	0	0	0	0	0	0	0	0	0	0	0	FALSE
147872	CCDC155	0	0	0	0	0	0	0	0	0	0	0	0	0	0	0	0	0	0	FALSE
154467	CCDC167	0	0	0	0	0	0	0	0	0	0	0	0	0	0	0	0	0	0	FALSE
728591	CCDC169	0	0	0	0	0	0	0	0	0	0	0	0	0	0	0	0	0	0	FALSE
149483	CCDC17	0	0	0	0	0	0	0	0	0	0	0	0	0	0	0	0	0	0	FALSE
80129	CCDC170	0	0	0	0	0	0	0	0	0	0	0	0	0	0	0	0	0	0	FALSE
203238	CCDC171	0	0	0	0	0	0	0	0	0	0	0	0	0	0	0	0	0	0	FALSE
374355	CCDC172	0	0	0	0	0	0	0	0	0	0	0	0	0	0	0	0	0	0	FALSE
374864	CCDC178	0	0	0	0	0	0	0	0	0	0	0	0	0	0	0	0	0	0	FALSE
100499483	CCDC180	0	0	0	0	0	0	0	0	0	0	0	0	0	0	0	0	0	0	FALSE
57821	CCDC181	0	0	0	0	0	0	0	0	0	0	0	0	0	0	0	0	0	0	FALSE
84960	CCDC183	0	0	0	0	0	0	0	0	0	0	0	0	0	0	0	0	0	0	FALSE
55088	CCDC186	0	0	0	0	0	0	0	0	0	0	0	0	0	0	0	0	0	0	FALSE
90835	CCDC189	0	0	0	0	0	0	0	0	0	0	0	0	0	0	0	0	0	0	FALSE
339512	CCDC190	0	0	0	0	0	0	0	0	0	0	0	0	0	0	0	0	0	0	FALSE
57577	CCDC191	0	0	0	0	0	0	0	0	0	0	0	0	0	0	0	0	0	0	FALSE
55195	CCDC198	0	0	0	0	0	0	0	0	0	0	0	0	0	0	0	0	0	0	FALSE
28952	CCDC22	0	0	0	0	0	0	0	0	0	0	0	0	0	0	0	0	0	0	FALSE
55246	CCDC25	0	0	0	0	0	0	0	0	0	0	0	0	0	0	0	0	0	0	FALSE
148870	CCDC27	0	0	0	0	0	0	0	0	0	0	0	0	0	0	0	0	0	0	FALSE
25901	CCDC28A	0	0	0	0	0	0	0	0	0	0	0	0	0	0	0	0	0	0	FALSE
79140	CCDC28B	0	0	0	0	0	0	0	0	0	0	0	0	0	0	0	0	0	0	FALSE
83643	CCDC3	0	0	0	0	0	0	0	0	0	0	0	0	0	0	0	0	0	0	FALSE
91057	CCDC34	0	0	0	0	0	0	0	0	0	0	0	0	0	0	0	0	0	0	FALSE
339834	CCDC36	0	0	0	0	0	0	0	0	0	0	0	0	0	0	0	0	0	0	FALSE
120935	CCDC38	0	0	0	0	0	0	0	0	0	0	0	0	0	0	0	0	0	0	FALSE
146849	CCDC42	0	0	0	0	0	0	0	0	0	0	0	0	0	0	0	0	0	0	FALSE
57003	CCDC47	0	0	0	0	0	0	0	0	0	0	0	0	0	0	0	0	0	0	FALSE
152137	CCDC50	0	0	0	0	0	0	0	0	0	0	0	0	0	0	0	0	0	0	FALSE
79714	CCDC51	0	0	0	0	0	0	0	0	0	0	0	0	0	0	0	0	0	0	FALSE
84692	CCDC54	0	0	0	0	0	0	0	0	0	0	0	0	0	0	0	0	0	0	FALSE
131076	CCDC58	0	0	0	0	0	0	0	0	0	0	0	0	0	0	0	0	0	0	FALSE
8030	CCDC6	0	0	0	0	0	0	0	0	0	0	0	0	0	0	0	0	0	0	FALSE
160777	CCDC60	0	0	0	0	0	0	0	0	0	0	0	0	0	0	0	0	0	0	FALSE
84660	CCDC62	0	0	0	0	0	0	0	0	0	0	0	0	0	0	0	0	0	0	FALSE
160762	CCDC63	0	0	0	0	0	0	0	0	0	0	0	0	0	0	0	0	0	0	FALSE
85478	CCDC65	0	0	0	0	0	0	0	0	0	0	0	0	0	0	0	0	0	0	FALSE
285331	CCDC66	0	0	0	0	0	0	0	0	0	0	0	0	0	0	0	0	0	0	FALSE
[truncated: 13,848 more rows]

## Sheet: S40_C60
EntrezID	GeneSymbol	bone	breast	central_nervous_system	colorectal	esophagus	gastric	kidney	leukemia	liver	lung	multiple_myeloma	ovary	pancreas	skin	upper_aerodigestive	urinary_tract	uterus	n_dependent_lineage	is_commonly_essential
1	A1BG	0	0	0	0	0	0	0	0	0	0	0	0	0	0	0	0	0	0	FALSE
29974	A1CF	0	0	0	0	0	0	0	0	0	0	0	0	0	0	0	0	0	0	FALSE
2	A2M	0	0	0	0	0	0	0	0	0	0	0	0	0	0	0	0	0	0	FALSE
144568	A2ML1	0	0	0	0	0	0	0	0	0	0	0	0	0	0	0	0	0	0	FALSE
53947	A4GALT	0	0	0	0	0	0	0	0	0	0	0	0	0	0	0	0	0	0	FALSE
51146	A4GNT	0	0	0	0	0	0	0	0	0	0	0	0	0	0	0	0	0	0	FALSE
8086	AAAS	0	0	0	0	0	0	0	0	0	0	0	0	0	0	0	0	0	0	FALSE
65985	AACS	0	0	0	0	0	0	0	0	0	0	0	0	0	0	0	0	0	0	FALSE
13	AADAC	0	0	0	0	0	0	0	0	0	0	0	0	0	0	0	0	0	0	FALSE
344752	AADACL2	0	0	0	0	0	0	0	0	0	0	0	0	0	0	0	0	0	0	FALSE
343066	AADACL4	0	0	0	0	0	0	0	0	0	0	0	0	0	0	0	0	0	0	FALSE
51166	AADAT	0	0	0	0	0	0	0	0	0	0	0	0	0	0	0	0	0	0	FALSE
195827	PRXL2C	0	0	0	0	0	0	0	0	0	0	0	0	0	0	0	0	0	0	FALSE
79719	AAGAB	0	0	0	0	0	0	0	0	0	0	0	0	0	0	0	0	0	0	FALSE
22848	AAK1	0	0	0	0	0	0	0	0	0	0	0	0	0	0	0	0	0	0	FALSE
28971	AAMDC	0	0	0	0	0	0	0	0	0	0	0	0	0	0	0	0	0	0	FALSE
14	AAMP	1	0	1	1	1	1	1	1	1	1	1	1	1	1	1	0	1	15	TRUE
15	AANAT	0	0	0	0	0	0	0	0	0	0	0	0	0	0	0	0	0	0	FALSE
25980	AAR2	0	0	0	0	0	0	0	0	0	0	0	0	0	0	0	0	0	0	FALSE
441376	AARD	0	0	0	0	0	0	0	0	0	0	0	0	0	0	0	0	0	0	FALSE
16	AARS	1	1	1	1	1	1	1	1	1	1	1	1	1	1	1	1	1	17	TRUE
57505	AARS2	0	1	0	0	1	1	0	0	0	1	1	0	0	0	1	1	0	7	FALSE
132949	AASDH	0	0	0	0	0	0	0	0	0	0	0	0	0	0	0	0	0	0	FALSE
60496	AASDHPPT	0	0	0	0	0	0	0	0	0	0	0	0	0	0	0	0	0	0	FALSE
10157	AASS	0	0	0	0	0	0	0	0	0	0	0	0	0	0	0	0	0	0	FALSE
26574	AATF	1	1	1	1	1	1	0	0	0	1	1	0	0	1	1	0	1	11	FALSE
9625	AATK	0	0	0	0	0	0	0	0	0	0	0	0	0	0	0	0	0	0	FALSE
18	ABAT	0	0	0	0	0	0	0	0	0	0	0	0	0	0	0	0	0	0	FALSE
19	ABCA1	0	0	0	0	0	0	0	0	0	0	0	0	0	0	0	0	0	0	FALSE
10349	ABCA10	0	0	0	0	0	0	0	0	0	0	0	0	0	0	0	0	0	0	FALSE
26154	ABCA12	0	0	0	0	0	0	0	0	0	0	0	0	0	0	0	0	0	0	FALSE
154664	ABCA13	0	0	0	0	0	0	0	0	0	0	0	0	0	0	0	0	0	0	FALSE
20	ABCA2	0	0	0	0	0	0	0	0	0	0	0	0	0	0	0	0	0	0	FALSE
21	ABCA3	0	0	0	0	0	0	0	0	0	0	0	0	0	0	0	0	0	0	FALSE
24	ABCA4	0	0	0	0	0	0	0	0	0	0	0	0	0	0	0	0	0	0	FALSE
23461	ABCA5	0	0	0	0	0	0	0	0	0	0	0	0	0	0	0	0	0	0	FALSE
23460	ABCA6	0	0	0	0	0	0	0	0	0	0	0	0	0	0	0	0	0	0	FALSE
10347	ABCA7	0	0	0	0	0	0	0	0	0	0	0	0	0	0	0	0	0	0	FALSE
10351	ABCA8	0	0	0	0	0	0	0	0	0	0	0	0	0	0	0	0	0	0	FALSE
10350	ABCA9	0	0	0	0	0	0	0	0	0	0	0	0	0	0	0	0	0	0	FALSE
5243	ABCB1	0	0	0	0	0	0	0	0	0	0	0	0	0	0	0	0	0	0	FALSE
23456	ABCB10	0	0	0	0	0	0	0	0	0	0	0	0	0	0	0	0	0	0	FALSE
8647	ABCB11	0	0	0	0	0	0	0	0	0	0	0	0	0	0	0	0	0	0	FALSE
5244	ABCB4	0	0	0	0	0	0	0	0	0	0	0	0	0	0	0	0	0	0	FALSE
340273	ABCB5	0	0	0	0	0	0	0	0	0	0	0	0	0	0	0	0	0	0	FALSE
10058	ABCB6	0	0	0	0	0	0	0	0	0	0	0	0	0	0	0	0	0	0	FALSE
22	ABCB7	1	1	1	1	1	1	1	1	1	1	1	1	1	1	1	1	1	17	TRUE
11194	ABCB8	0	0	0	0	0	0	0	0	0	0	0	0	0	0	0	0	0	0	FALSE
23457	ABCB9	0	0	0	0	0	0	0	0	0	0	0	0	0	0	0	0	0	0	FALSE
4363	ABCC1	0	0	0	0	0	0	0	0	0	0	0	0	0	0	0	0	0	0	FALSE
89845	ABCC10	0	0	0	0	0	0	0	0	0	0	0	0	0	0	0	0	0	0	FALSE
85320	ABCC11	0	0	0	0	0	0	0	0	0	0	0	0	0	0	0	0	0	0	FALSE
94160	ABCC12	0	0	0	0	0	0	0	0	0	0	0	0	0	0	0	0	0	0	FALSE
1244	ABCC2	0	0	0	0	0	0	0	0	0	0	0	0	0	0	0	0	0	0	FALSE
8714	ABCC3	0	0	0	0	0	0	0	0	0	0	0	0	0	0	0	0	0	0	FALSE
10257	ABCC4	0	0	0	0	0	0	0	0	0	0	0	0	0	0	0	0	0	0	FALSE
10057	ABCC5	0	0	0	0	0	0	0	0	0	0	0	0	0	0	0	0	0	0	FALSE
368	ABCC6	0	0	0	0	0	0	0	0	0	0	0	0	0	0	0	0	0	0	FALSE
6833	ABCC8	0	0	0	0	0	0	0	0	0	0	0	0	0	0	0	0	0	0	FALSE
10060	ABCC9	0	0	0	0	0	0	0	0	0	0	0	0	0	0	0	0	0	0	FALSE
215	ABCD1	0	0	0	0	0	0	0	0	0	0	0	0	0	0	0	0	0	0	FALSE
225	ABCD2	0	0	0	0	0	0	0	0	0	0	0	0	0	0	0	0	0	0	FALSE
5825	ABCD3	0	0	0	0	0	0	0	0	0	0	0	0	0	0	0	0	0	0	FALSE
5826	ABCD4	0	0	0	0	0	0	0	0	0	0	0	0	0	0	0	0	0	0	FALSE
6059	ABCE1	1	1	1	1	1	1	1	1	1	1	1	1	1	1	1	1	1	17	TRUE
23	ABCF1	1	1	1	1	1	1	1	1	1	1	1	1	1	1	1	1	1	17	TRUE
10061	ABCF2	0	0	0	0	0	0	0	0	0	0	0	0	0	0	0	0	0	0	FALSE
55324	ABCF3	0	0	0	0	0	0	0	0	0	0	0	0	0	0	0	0	0	0	FALSE
9619	ABCG1	0	0	0	0	0	0	0	0	0	0	0	0	0	0	0	0	0	0	FALSE
9429	ABCG2	0	0	0	0	0	0	0	0	0	0	0	0	0	0	0	0	0	0	FALSE
64137	ABCG4	0	0	0	0	0	0	0	0	0	0	0	0	0	0	0	0	0	0	FALSE
64240	ABCG5	0	0	0	0	0	0	0	0	0	0	0	0	0	0	0	0	0	0	FALSE
64241	ABCG8	0	0	0	0	0	0	0	0	0	0	0	0	0	0	0	0	0	0	FALSE
55347	ABHD10	0	0	0	0	0	0	0	0	0	0	0	0	0	0	0	0	0	0	FALSE
83451	ABHD11	0	0	0	0	0	0	0	0	0	0	0	0	0	0	0	0	0	0	FALSE
26090	ABHD12	0	0	0	0	0	0	0	0	0	0	0	0	0	0	0	0	0	0	FALSE
145447	ABHD12B	0	0	0	0	0	0	0	0	0	0	0	0	0	0	0	0	0	0	FALSE
84945	ABHD13	0	0	0	0	0	0	0	0	0	0	0	0	0	0	0	0	0	0	FALSE
25864	ABHD14A	0	0	0	0	0	0	0	0	0	0	0	0	0	0	0	0	0	0	FALSE
84836	ABHD14B	0	0	0	0	0	0	0	0	0	0	0	0	0	0	0	0	0	0	FALSE
116236	ABHD15	0	0	0	0	0	0	0	0	0	0	0	0	0	0	0	0	0	0	FALSE
7920	ABHD16A	0	0	0	0	0	0	0	0	0	0	0	0	0	0	0	0	0	0	FALSE
140701	ABHD16B	0	0	0	0	0	0	0	0	0	0	0	0	0	0	0	0	0	0	FALSE
81926	ABHD17A	0	0	0	0	0	0	0	0	0	0	0	0	0	0	0	0	0	0	FALSE
51104	ABHD17B	0	0	0	0	0	0	0	0	0	0	0	0	0	0	0	0	0	0	FALSE
11057	ABHD2	0	0	0	0	0	0	0	0	0	0	0	0	0	0	0	0	0	0	FALSE
171586	ABHD3	0	0	0	0	0	0	0	0	0	0	0	0	0	0	0	0	0	0	FALSE
63874	ABHD4	0	0	0	0	0	0	0	0	0	0	0	0	0	0	0	0	0	0	FALSE
51099	ABHD5	0	0	0	0	0	0	0	0	0	0	0	0	0	0	0	0	0	0	FALSE
57406	ABHD6	0	0	0	0	0	0	0	0	0	0	0	0	0	0	0	0	0	0	FALSE
79575	ABHD8	0	0	0	0	0	0	0	0	0	0	0	0	0	0	0	0	0	0	FALSE
10006	ABI1	0	0	0	0	0	0	0	0	0	0	0	0	0	0	0	0	0	0	FALSE
10152	ABI2	0	0	0	0	0	0	0	0	0	0	0	0	0	0	0	0	0	0	FALSE
51225	ABI3	0	0	0	0	0	0	0	0	0	0	0	0	0	0	0	0	0	0	FALSE
25	ABL1	0	0	0	0	0	0	0	0	0	0	0	0	0	0	0	0	0	0	FALSE
27	ABL2	0	0	0	0	0	0	0	0	0	0	0	0	0	0	0	0	0	0	FALSE
3983	ABLIM1	0	0	0	0	0	0	0	0	0	0	0	0	0	0	0	0	0	0	FALSE
84448	ABLIM2	0	0	0	0	0	0	0	0	0	0	0	0	0	0	0	0	0	0	FALSE
22885	ABLIM3	0	0	0	0	0	0	0	0	0	0	0	0	0	0	0	0	0	0	FALSE
29	ABR	0	0	0	0	0	0	0	0	0	0	0	0	0	0	0	0	0	0	FALSE
137735	ABRA	0	0	0	0	0	0	0	0	0	0	0	0	0	0	0	0	0	0	FALSE
84142	ABRAXAS1	0	0	0	0	0	0	0	0	0	0	0	0	0	0	0	0	0	0	FALSE
23172	ABRAXAS2	0	0	0	0	0	0	0	0	0	0	0	0	0	0	0	0	0	0	FALSE
29777	ABT1	0	0	0	0	0	0	0	0	0	0	0	0	0	0	0	0	0	0	FALSE
80325	ABTB1	0	0	0	0	0	0	0	0	0	0	0	0	0	0	0	0	0	0	FALSE
25841	ABTB2	0	0	0	0	0	0	0	0	0	0	0	0	0	0	0	0	0	0	FALSE
30	ACAA1	0	0	0	0	0	0	0	0	0	0	0	0	0	0	0	0	0	0	FALSE
10449	ACAA2	0	0	0	0	0	0	0	0	0	0	0	0	0	0	0	0	0	0	FALSE
31	ACACA	0	0	0	0	0	0	0	0	0	0	0	0	0	0	0	0	0	0	FALSE
32	ACACB	0	0	0	0	0	0	0	0	0	0	0	0	0	0	0	0	0	0	FALSE
80724	ACAD10	0	0	0	0	0	0	0	0	0	0	0	0	0	0	0	0	0	0	FALSE
84129	ACAD11	0	0	0	0	0	0	0	0	0	0	0	0	0	0	0	0	0	0	FALSE
27034	ACAD8	0	0	0	0	0	0	0	0	0	0	0	0	0	0	0	0	0	0	FALSE
28976	ACAD9	0	0	0	0	0	0	0	0	0	0	0	0	0	0	0	0	0	0	FALSE
33	ACADL	0	0	0	0	0	0	0	0	0	0	0	0	0	0	0	0	0	0	FALSE
34	ACADM	0	0	0	0	0	0	0	0	0	0	0	0	0	0	0	0	0	0	FALSE
35	ACADS	0	0	0	0	0	0	0	0	0	0	0	0	0	0	0	0	0	0	FALSE
36	ACADSB	0	0	0	0	0	0	0	0	0	0	0	0	0	0	0	0	0	0	FALSE
37	ACADVL	0	0	0	0	0	0	0	0	0	0	0	0	0	0	0	0	0	0	FALSE
176	ACAN	0	0	0	0	0	0	0	0	0	0	0	0	0	0	0	0	0	0	FALSE
9744	ACAP1	0	0	0	0	0	0	0	0	0	0	0	0	0	0	0	0	0	0	FALSE
23527	ACAP2	0	0	0	0	0	0	0	0	0	0	0	0	0	0	0	0	0	0	FALSE
116983	ACAP3	0	0	0	0	0	0	0	0	0	0	0	0	0	0	0	0	0	0	FALSE
38	ACAT1	0	0	0	0	0	0	0	0	0	0	0	0	0	0	0	0	0	0	FALSE
39	ACAT2	0	0	0	0	0	0	0	0	0	0	0	0	0	0	0	0	0	0	FALSE
64746	ACBD3	0	0	0	0	0	0	0	0	0	0	0	0	0	0	0	0	0	0	FALSE
79777	ACBD4	0	0	0	0	0	0	0	0	0	0	0	0	0	0	0	0	0	0	FALSE
91452	ACBD5	0	0	0	0	0	0	0	0	0	0	0	0	0	0	0	0	0	0	FALSE
84320	ACBD6	0	0	0	0	0	0	0	0	0	0	0	0	0	0	0	0	0	0	FALSE
84680	ACCS	0	0	0	0	0	0	0	0	0	0	0	0	0	0	0	0	0	0	FALSE
390110	ACCSL	0	0	0	0	0	0	0	0	0	0	0	0	0	0	0	0	0	0	FALSE
65057	ACD	0	0	0	0	0	0	0	0	0	0	0	0	0	0	0	0	0	0	FALSE
1636	ACE	0	0	0	0	0	0	0	0	0	0	0	0	0	0	0	0	0	0	FALSE
59272	ACE2	0	0	0	0	0	0	0	0	0	0	0	0	0	0	0	0	0	0	FALSE
125981	ACER1	0	0	0	0	0	0	0	0	0	0	0	0	0	0	0	0	0	0	FALSE
340485	ACER2	0	0	0	0	0	0	0	0	0	0	0	0	0	0	0	0	0	0	FALSE
55331	ACER3	0	0	0	0	0	0	0	0	0	0	0	0	0	0	0	0	0	0	FALSE
43	ACHE	0	0	0	0	0	0	0	0	0	0	0	0	0	0	0	0	0	0	FALSE
22985	ACIN1	1	1	1	0	0	1	0	1	1	1	1	0	0	1	0	0	1	10	FALSE
2532	ACKR1	0	0	0	0	0	0	0	0	0	0	0	0	0	0	0	0	0	0	FALSE
1238	ACKR2	0	0	0	0	0	0	0	0	0	0	0	0	0	0	0	0	0	0	FALSE
57007	ACKR3	0	0	0	0	0	0	0	0	0	0	0	0	0	0	0	0	0	0	FALSE
51554	ACKR4	0	0	0	0	0	0	0	0	0	0	0	0	0	0	0	0	0	0	FALSE
47	ACLY	0	0	0	0	0	0	0	0	0	0	1	0	0	1	0	0	0	2	FALSE
130013	ACMSD	0	0	0	0	0	0	0	0	0	0	0	0	0	0	0	0	0	0	FALSE
48	ACO1	0	0	0	0	0	0	0	0	0	0	0	0	0	0	0	0	0	0	FALSE
50	ACO2	0	1	0	0	0	0	0	0	0	1	1	0	0	0	0	0	0	3	FALSE
641371	ACOT1	0	0	0	0	0	0	0	0	0	0	0	0	0	0	0	0	0	0	FALSE
26027	ACOT11	0	0	0	0	0	0	0	0	0	0	0	0	0	0	0	0	0	0	FALSE
134526	ACOT12	0	0	0	0	0	0	0	0	0	0	0	0	0	0	0	0	0	0	FALSE
55856	ACOT13	0	0	0	0	0	0	0	0	0	0	0	0	0	0	0	0	0	0	FALSE
10965	ACOT2	0	0	0	0	0	0	0	0	0	0	0	0	0	0	0	0	0	0	FALSE
122970	ACOT4	0	0	0	0	0	0	0	0	0	0	0	0	0	0	0	0	0	0	FALSE
11332	ACOT7	0	0	0	0	0	0	0	0	0	0	0	0	0	0	0	0	0	0	FALSE
10005	ACOT8	0	0	0	0	0	0	0	0	0	0	0	0	0	0	0	0	0	0	FALSE
23597	ACOT9	0	0	0	0	0	0	0	0	0	0	0	0	0	0	0	0	0	0	FALSE
51	ACOX1	0	0	0	0	0	0	0	0	0	0	0	0	0	0	0	0	0	0	FALSE
8309	ACOX2	0	0	0	0	0	0	0	0	0	0	0	0	0	0	0	0	0	0	FALSE
8310	ACOX3	0	0	0	0	0	0	0	0	0	0	0	0	0	0	0	0	0	0	FALSE
55289	ACOXL	0	0	0	0	0	0	0	0	0	0	0	0	0	0	0	0	0	0	FALSE
52	ACP1	0	0	0	0	0	0	0	0	0	0	0	0	0	0	0	0	0	0	FALSE
53	ACP2	0	0	0	0	0	0	0	0	0	0	0	0	0	0	0	0	0	0	FALSE
54	ACP5	0	0	0	0	0	0	0	0	0	0	0	0	0	0	0	0	0	0	FALSE
51205	ACP6	0	0	0	0	0	0	0	0	0	0	0	0	0	0	0	0	0	0	FALSE
390928	ACP7	0	0	0	0	0	0	0	0	0	0	0	0	0	0	0	0	0	0	FALSE
55	ACPP	0	0	0	0	0	0	0	0	0	0	0	0	0	0	0	0	0	0	FALSE
49	ACR	0	0	0	0	0	0	0	0	0	0	0	0	0	0	0	0	0	0	FALSE
84519	ACRBP	0	0	0	0	0	0	0	0	0	0	0	0	0	0	0	0	0	0	FALSE
56	ACRV1	0	0	0	0	0	0	0	0	0	0	0	0	0	0	0	0	0	0	FALSE
23205	ACSBG1	0	0	0	0	0	0	0	0	0	0	0	0	0	0	0	0	0	0	FALSE
81616	ACSBG2	0	0	0	0	0	0	0	0	0	0	0	0	0	0	0	0	0	0	FALSE
80221	ACSF2	0	0	0	0	0	0	0	0	0	0	0	0	0	0	0	0	0	0	FALSE
197322	ACSF3	0	0	0	0	0	0	0	0	0	0	0	0	0	0	0	0	0	0	FALSE
2180	ACSL1	0	0	0	0	0	0	0	0	0	0	0	0	0	0	0	0	0	0	FALSE
2181	ACSL3	0	0	0	0	0	0	0	0	0	0	0	0	0	0	0	0	0	0	FALSE
2182	ACSL4	0	0	0	0	0	0	0	0	0	0	0	0	0	0	0	0	0	0	FALSE
51703	ACSL5	0	0	0	0	0	0	0	0	0	0	0	0	0	0	0	0	0	0	FALSE
23305	ACSL6	0	0	0	0	0	0	0	0	0	0	0	0	0	0	0	0	0	0	FALSE
116285	ACSM1	0	0	0	0	0	0	0	0	0	0	0	0	0	0	0	0	0	0	FALSE
348158	ACSM2B	0	0	0	0	0	0	0	0	0	0	0	0	0	0	0	0	0	0	FALSE
6296	ACSM3	0	0	0	0	0	0	0	0	0	0	0	0	0	0	0	0	0	0	FALSE
54988	ACSM5	0	0	0	0	0	0	0	0	0	0	0	0	0	0	0	0	0	0	FALSE
142827	ACSM6	0	0	0	0	0	0	0	0	0	0	0	0	0	0	0	0	0	0	FALSE
84532	ACSS1	0	0	0	0	0	0	0	0	0	0	0	0	0	0	0	0	0	0	FALSE
55902	ACSS2	0	0	0	0	0	0	0	0	0	0	0	0	0	0	0	0	0	0	FALSE
79611	ACSS3	0	0	0	0	0	0	0	0	0	0	0	0	0	0	0	0	0	0	FALSE
58	ACTA1	0	0	0	0	0	0	0	0	0	0	0	0	0	0	0	0	0	0	FALSE
59	ACTA2	0	0	0	0	0	0	0	0	0	0	0	0	0	0	0	0	0	0	FALSE
60	ACTB	0	1	1	1	1	1	0	1	1	1	0	0	0	0	1	1	0	10	FALSE
345651	ACTBL2	0	0	0	0	0	0	0	0	0	0	0	0	0	0	0	0	0	0	FALSE
70	ACTC1	0	0	0	0	0	0	0	0	0	0	0	0	0	0	0	0	0	0	FALSE
71	ACTG1	0	0	0	0	0	0	0	0	0	1	0	0	0	0	0	0	0	1	FALSE
72	ACTG2	0	0	0	0	0	0	0	0	0	0	0	0	0	0	0	0	0	0	FALSE
86	ACTL6A	1	1	1	1	1	1	1	1	1	1	1	1	1	1	1	1	1	17	TRUE
51412	ACTL6B	0	0	0	0	0	0	0	0	0	0	0	0	0	0	0	0	0	0	FALSE
10881	ACTL7A	0	0	0	0	0	0	0	0	0	0	0	0	0	0	0	0	0	0	FALSE
10880	ACTL7B	0	0	0	0	0	0	0	0	0	0	0	0	0	0	0	0	0	0	FALSE
81569	ACTL8	0	0	0	0	0	0	0	0	0	0	0	0	0	0	0	0	0	0	FALSE
284382	ACTL9	0	0	0	0	0	0	0	0	0	0	0	0	0	0	0	0	0	0	FALSE
87	ACTN1	0	0	0	0	0	0	0	0	0	0	0	0	0	0	0	0	0	0	FALSE
88	ACTN2	0	0	0	0	0	0	0	0	0	0	0	0	0	0	0	0	0	0	FALSE
81	ACTN4	0	0	0	0	0	0	0	0	0	0	0	0	0	0	0	0	0	0	FALSE
55860	ACTR10	1	1	1	1	1	1	1	1	1	1	1	1	1	1	1	1	1	17	TRUE
10121	ACTR1A	1	1	1	1	1	1	1	1	1	1	1	1	1	1	1	1	1	17	TRUE
10120	ACTR1B	0	0	0	0	0	0	0	0	0	0	0	0	0	0	0	0	0	0	FALSE
10097	ACTR2	1	1	1	1	1	1	1	1	1	1	1	1	1	1	1	1	1	17	TRUE
10096	ACTR3	0	0	0	0	0	0	0	0	0	0	0	0	0	0	0	0	0	0	FALSE
57180	ACTR3B	0	0	0	0	0	0	0	0	0	0	0	0	0	0	0	0	0	0	FALSE
79913	ACTR5	0	0	0	0	0	0	0	0	0	0	0	0	0	0	0	0	0	0	FALSE
64431	ACTR6	1	1	1	1	1	1	1	1	1	1	1	1	1	1	1	1	1	17	TRUE
93973	ACTR8	1	1	1	1	1	1	1	1	1	1	1	1	1	1	1	1	1	17	TRUE
139741	ACTRT1	0	0	0	0	0	0	0	0	0	0	0	0	0	0	0	0	0	0	FALSE
140625	ACTRT2	0	0	0	0	0	0	0	0	0	0	0	0	0	0	0	0	0	0	FALSE
84517	ACTRT3	0	0	0	0	0	0	0	0	0	0	0	0	0	0	0	0	0	0	FALSE
90	ACVR1	0	0	0	0	0	0	0	0	0	0	0	0	0	0	0	0	0	0	FALSE
91	ACVR1B	0	0	0	0	0	0	0	0	0	0	0	0	0	0	0	0	0	0	FALSE
130399	ACVR1C	0	0	0	0	0	0	0	0	0	0	0	0	0	0	0	0	0	0	FALSE
92	ACVR2A	0	0	0	0	0	0	0	0	0	0	0	0	0	0	0	0	0	0	FALSE
93	ACVR2B	0	0	0	0	0	0	0	0	0	0	0	0	0	0	0	0	0	0	FALSE
94	ACVRL1	0	0	0	0	0	0	0	0	0	0	0	0	0	0	0	0	0	0	FALSE
95	ACY1	0	0	0	0	0	0	0	0	0	0	0	0	0	0	0	0	0	0	FALSE
91703	ACY3	0	0	0	0	0	0	0	0	0	0	0	0	0	0	0	0	0	0	FALSE
97	ACYP1	0	0	0	0	0	0	0	0	0	0	0	0	0	0	0	0	0	0	FALSE
98	ACYP2	0	0	0	0	0	0	0	0	0	0	0	0	0	0	0	0	0	0	FALSE
100	ADA	0	0	0	0	0	0	0	0	0	0	0	0	0	0	0	0	0	0	FALSE
51816	ADA2	0	0	0	0	0	0	0	0	0	0	0	0	0	0	0	0	0	0	FALSE
132612	ADAD1	0	0	0	0	0	0	0	0	0	0	0	0	0	0	0	0	0	0	FALSE
161931	ADAD2	0	0	0	0	0	0	0	0	0	0	0	0	0	0	0	0	0	0	FALSE
161823	ADAL	0	0	0	0	0	0	0	0	0	0	0	0	0	0	0	0	0	0	FALSE
102	ADAM10	0	0	0	0	0	0	0	0	0	0	0	0	0	0	0	0	0	0	FALSE
4185	ADAM11	0	0	0	0	0	0	0	0	0	0	0	0	0	0	0	0	0	0	FALSE
8038	ADAM12	0	0	0	0	0	0	0	0	0	0	0	0	0	0	0	0	0	0	FALSE
8751	ADAM15	0	0	0	0	0	0	0	0	0	0	0	0	0	0	0	0	0	0	FALSE
6868	ADAM17	0	0	0	0	0	0	0	0	0	0	0	0	0	0	0	0	0	0	FALSE
8749	ADAM18	0	0	0	0	0	0	0	0	0	0	0	0	0	0	0	0	0	0	FALSE
8728	ADAM19	0	0	0	0	0	0	0	0	0	0	0	0	0	0	0	0	0	0	FALSE
2515	ADAM2	0	0	0	0	0	0	0	0	0	0	0	0	0	0	0	0	0	0	FALSE
8748	ADAM20	0	0	0	0	0	0	0	0	0	0	0	0	0	0	0	0	0	0	FALSE
8747	ADAM21	0	0	0	0	0	0	0	0	0	0	0	0	0	0	0	0	0	0	FALSE
53616	ADAM22	0	0	0	0	0	0	0	0	0	0	0	0	0	0	0	0	0	0	FALSE
8745	ADAM23	0	0	0	0	0	0	0	0	0	0	0	0	0	0	0	0	0	0	FALSE
10863	ADAM28	0	0	0	0	0	0	0	0	0	0	0	0	0	0	0	0	0	0	FALSE
11086	ADAM29	0	0	0	0	0	0	0	0	0	0	0	0	0	0	0	0	0	0	FALSE
11085	ADAM30	0	0	0	0	0	0	0	0	0	0	0	0	0	0	0	0	0	0	FALSE
203102	ADAM32	0	0	0	0	0	0	0	0	0	0	0	0	0	0	0	0	0	0	FALSE
80332	ADAM33	0	0	0	0	0	0	0	0	0	0	0	0	0	0	0	0	0	0	FALSE
8756	ADAM7	0	0	0	0	0	0	0	0	0	0	0	0	0	0	0	0	0	0	FALSE
101	ADAM8	0	0	0	0	0	0	0	0	0	0	0	0	0	0	0	0	0	0	FALSE
8754	ADAM9	0	0	0	0	0	0	0	0	0	0	0	0	0	0	0	0	0	0	FALSE
27299	ADAMDEC1	0	0	0	0	0	0	0	0	0	0	0	0	0	0	0	0	0	0	FALSE
9510	ADAMTS1	0	0	0	0	0	0	0	0	0	0	0	0	0	0	0	0	0	0	FALSE
81794	ADAMTS10	0	0	0	0	0	0	0	0	0	0	0	0	0	0	0	0	0	0	FALSE
81792	ADAMTS12	0	0	0	0	0	0	0	0	0	0	0	0	0	0	0	0	0	0	FALSE
11093	ADAMTS13	0	0	0	0	0	0	0	0	0	0	0	0	0	0	0	0	0	0	FALSE
140766	ADAMTS14	0	0	0	0	0	0	0	0	0	0	0	0	0	0	0	0	0	0	FALSE
170689	ADAMTS15	0	0	0	0	0	0	0	0	0	0	0	0	0	0	0	0	0	0	FALSE
170690	ADAMTS16	0	0	0	0	0	0	0	0	0	0	0	0	0	0	0	0	0	0	FALSE
170691	ADAMTS17	0	0	0	0	0	0	0	0	0	0	0	0	0	0	0	0	0	0	FALSE
170692	ADAMTS18	0	0	0	0	0	0	0	0	0	0	0	0	0	0	0	0	0	0	FALSE
171019	ADAMTS19	0	0	0	0	0	0	0	0	0	0	0	0	0	0	0	0	0	0	FALSE
9509	ADAMTS2	0	0	0	0	0	0	0	0	0	0	0	0	0	0	0	0	0	0	FALSE
80070	ADAMTS20	0	0	0	0	0	0	0	0	0	0	0	0	0	0	0	0	0	0	FALSE
9508	ADAMTS3	0	0	0	0	0	0	0	0	0	0	0	0	0	0	0	0	0	0	FALSE
9507	ADAMTS4	0	0	0	0	0	0	0	0	0	0	0	0	0	0	0	0	0	0	FALSE
11096	ADAMTS5	0	0	0	0	0	0	0	0	0	0	0	0	0	0	0	0	0	0	FALSE
11174	ADAMTS6	0	0	0	0	0	0	0	0	0	0	0	0	0	0	0	0	0	0	FALSE
11173	ADAMTS7	0	0	0	0	0	0	0	0	0	0	0	0	0	0	0	0	0	0	FALSE
11095	ADAMTS8	0	0	0	0	0	0	0	0	0	0	0	0	0	0	0	0	0	0	FALSE
56999	ADAMTS9	0	0	0	0	0	0	0	0	0	0	0	0	0	0	0	0	0	0	FALSE
92949	ADAMTSL1	0	0	0	0	0	0	0	0	0	0	0	0	0	0	0	0	0	0	FALSE
9719	ADAMTSL2	0	0	0	0	0	0	0	0	0	0	0	0	0	0	0	0	0	0	FALSE
57188	ADAMTSL3	0	0	0	0	0	0	0	0	0	0	0	0	0	0	0	0	0	0	FALSE
54507	ADAMTSL4	0	0	0	0	0	0	0	0	0	0	0	0	0	0	0	0	0	0	FALSE
339366	ADAMTSL5	0	0	0	0	0	0	0	0	0	0	0	0	0	0	0	0	0	0	FALSE
11033	ADAP1	0	0	0	0	0	0	0	0	0	0	0	0	0	0	0	0	0	0	FALSE
55803	ADAP2	0	0	0	0	0	0	0	0	0	0	0	0	0	0	0	0	0	0	FALSE
103	ADAR	0	0	0	0	0	0	0	0	0	0	0	0	0	0	0	0	0	0	FALSE
104	ADARB1	0	0	0	0	0	0	0	0	0	0	0	0	0	0	0	0	0	0	FALSE
105	ADARB2	0	0	0	0	0	0	0	0	0	0	0	0	0	0	0	0	0	0	FALSE
23536	ADAT1	0	0	0	0	0	0	0	0	0	0	0	0	0	0	0	0	0	0	FALSE
134637	ADAT2	0	0	1	0	0	0	0	0	0	1	0	0	1	0	1	1	0	5	FALSE
113179	ADAT3	0	0	0	0	0	0	0	0	0	0	0	0	0	0	0	0	0	0	FALSE
57143	ADCK1	0	0	0	0	0	0	0	0	0	0	0	0	0	0	0	0	0	0	FALSE
90956	ADCK2	0	0	0	0	0	0	0	0	0	0	0	0	0	0	0	0	0	0	FALSE
203054	ADCK5	0	0	0	0	0	0	0	0	0	0	0	0	0	0	0	0	0	0	FALSE
107	ADCY1	0	0	0	0	0	0	0	0	0	0	0	0	0	0	0	0	0	0	FALSE
55811	ADCY10	0	0	0	0	0	0	0	0	0	0	0	0	0	0	0	0	0	0	FALSE
108	ADCY2	0	0	0	0	0	0	0	0	0	0	0	0	0	0	0	0	0	0	FALSE
109	ADCY3	0	0	0	0	0	0	0	0	0	0	0	0	0	0	0	0	0	0	FALSE
196883	ADCY4	0	0	0	0	0	0	0	0	0	0	0	0	0	0	0	0	0	0	FALSE
111	ADCY5	0	0	0	0	0	0	0	0	0	0	0	0	0	0	0	0	0	0	FALSE
112	ADCY6	0	0	0	0	0	0	0	0	0	0	0	0	0	0	0	0	0	0	FALSE
113	ADCY7	0	0	0	0	0	0	0	0	0	0	0	0	0	0	0	0	0	0	FALSE
114	ADCY8	0	0	0	0	0	0	0	0	0	0	0	0	0	0	0	0	0	0	FALSE
115	ADCY9	0	0	0	0	0	0	0	0	0	0	0	0	0	0	0	0	0	0	FALSE
116	ADCYAP1	0	0	0	0	0	0	0	0	0	0	0	0	0	0	0	0	0	0	FALSE
117	ADCYAP1R1	0	0	0	0	0	0	0	0	0	0	0	0	0	0	0	0	0	0	FALSE
118	ADD1	0	0	0	0	0	0	0	0	0	0	0	0	0	0	0	0	0	0	FALSE
119	ADD2	0	0	0	0	0	0	0	0	0	0	0	0	0	0	0	0	0	0	FALSE
120	ADD3	0	0	0	0	0	0	0	0	0	0	0	0	0	0	0	0	0	0	FALSE
84435	ADGRA1	0	0	0	0	0	0	0	0	0	0	0	0	0	0	0	0	0	0	FALSE
25960	ADGRA2	0	0	0	0	0	0	0	0	0	0	0	0	0	0	0	0	0	0	FALSE
166647	ADGRA3	0	0	0	0	0	0	0	0	0	0	0	0	0	0	0	0	0	0	FALSE
575	ADGRB1	0	0	0	0	0	0	0	0	0	0	0	0	0	0	0	0	0	0	FALSE
576	ADGRB2	0	0	0	0	0	0	0	0	0	0	0	0	0	0	0	0	0	0	FALSE
577	ADGRB3	0	0	0	0	0	0	0	0	0	0	0	0	0	0	0	0	0	0	FALSE
283383	ADGRD1	0	0	0	0	0	0	0	0	0	0	0	0	0	0	0	0	0	0	FALSE
2015	ADGRE1	0	0	0	0	0	0	0	0	0	0	0	0	0	0	0	0	0	0	FALSE
30817	ADGRE2	0	0	0	0	0	0	0	0	0	0	0	0	0	0	0	0	0	0	FALSE
84658	ADGRE3	0	0	0	0	0	0	0	0	0	0	0	0	0	0	0	0	0	0	FALSE
976	ADGRE5	0	0	0	0	0	0	0	0	0	0	0	0	0	0	0	0	0	0	FALSE
266977	ADGRF1	0	0	0	0	0	0	0	0	0	0	0	0	0	0	0	0	0	0	FALSE
165082	ADGRF3	0	0	0	0	0	0	0	0	0	0	0	0	0	0	0	0	0	0	FALSE
221393	ADGRF4	0	0	0	0	0	0	0	0	0	0	0	0	0	0	0	0	0	0	FALSE
221395	ADGRF5	0	0	0	0	0	0	0	0	0	0	0	0	0	0	0	0	0	0	FALSE
9289	ADGRG1	0	0	0	0	0	0	0	0	0	0	0	0	0	0	0	0	0	0	FALSE
10149	ADGRG2	0	0	0	0	0	0	0	0	0	0	0	0	0	0	0	0	0	0	FALSE
222487	ADGRG3	0	0	0	0	0	0	0	0	0	0	0	0	0	0	0	0	0	0	FALSE
139378	ADGRG4	0	0	0	0	0	0	0	0	0	0	0	0	0	0	0	0	0	0	FALSE
221188	ADGRG5	0	0	0	0	0	0	0	0	0	0	0	0	0	0	0	0	0	0	FALSE
57211	ADGRG6	0	0	0	0	0	0	0	0	0	0	0	0	0	0	0	0	0	0	FALSE
84873	ADGRG7	0	0	0	0	0	0	0	0	0	0	0	0	0	0	0	0	0	0	FALSE
22859	ADGRL1	0	0	0	0	0	0	0	0	0	0	0	0	0	0	0	0	0	0	FALSE
23266	ADGRL2	0	0	0	0	0	0	0	0	0	0	0	0	0	0	0	0	0	0	FALSE
23284	ADGRL3	0	0	0	0	0	0	0	0	0	0	0	0	0	0	0	0	0	0	FALSE
64123	ADGRL4	0	0	0	0	0	0	0	0	0	0	0	0	0	0	0	0	0	0	FALSE
84059	ADGRV1	0	0	0	0	0	0	0	0	0	0	0	0	0	0	0	0	0	0	FALSE
124	ADH1A	0	0	0	0	0	0	0	0	0	0	0	0	0	0	0	0	0	0	FALSE
125	ADH1B	0	0	0	0	0	0	0	0	0	0	0	0	0	0	0	0	0	0	FALSE
127	ADH4	0	0	0	0	0	0	0	0	0	0	0	0	0	0	0	0	0	0	FALSE
128	ADH5	0	0	0	0	0	0	0	0	0	0	0	0	0	0	0	0	0	0	FALSE
130	ADH6	0	0	0	0	0	0	0	0	0	0	0	0	0	0	0	0	0	0	FALSE
137872	ADHFE1	0	0	0	0	0	0	0	0	0	0	0	0	0	0	0	0	0	0	FALSE
55256	ADI1	0	0	0	0	0	0	0	0	0	0	0	0	0	0	0	0	0	0	FALSE
149685	ADIG	0	0	0	0	0	0	0	0	0	0	0	0	0	0	0	0	0	0	FALSE
9370	ADIPOQ	0	0	0	0	0	0	0	0	0	0	0	0	0	0	0	0	0	0	FALSE
51094	ADIPOR1	0	0	0	0	0	0	0	0	0	0	0	0	0	0	0	0	0	0	FALSE
79602	ADIPOR2	0	0	0	0	0	0	0	0	0	0	0	0	0	0	0	0	0	0	FALSE
10974	ADIRF	0	0	0	0	0	0	0	0	0	0	0	0	0	0	0	0	0	0	FALSE
132	ADK	0	0	0	0	0	0	0	0	0	0	0	0	0	0	0	0	0	0	FALSE
133	ADM	0	0	0	0	0	0	0	0	0	0	0	0	0	0	0	0	0	0	FALSE
79924	ADM2	0	0	0	0	0	0	0	0	0	0	0	0	0	0	0	0	0	0	FALSE
23394	ADNP	0	0	0	0	0	0	0	0	0	0	0	0	0	0	0	0	0	0	FALSE
22850	ADNP2	0	0	0	0	0	0	0	0	0	0	0	0	0	0	0	0	0	0	FALSE
134	ADORA1	0	0	0	0	0	0	0	0	0	0	0	0	0	0	0	0	0	0	FALSE
135	ADORA2A	0	0	0	0	0	0	0	0	0	0	0	0	0	0	0	0	0	0	FALSE
136	ADORA2B	0	0	0	0	0	0	0	0	0	0	0	0	0	0	0	0	0	0	FALSE
83440	ADPGK	0	0	0	0	0	0	0	0	0	0	0	0	0	0	0	0	0	0	FALSE
141	ADPRH	0	0	0	0	0	0	0	0	0	0	0	0	0	0	0	0	0	0	FALSE
113622	ADPRHL1	0	0	0	0	0	0	0	0	0	0	0	0	0	0	0	0	0	0	FALSE
54936	ADPRHL2	0	0	0	0	0	0	0	0	0	0	0	0	0	0	0	0	0	0	FALSE
56985	ADPRM	0	0	0	0	0	0	0	0	0	0	0	0	0	0	0	0	0	0	FALSE
148	ADRA1A	0	0	0	0	0	0	0	0	0	0	0	0	0	0	0	0	0	0	FALSE
147	ADRA1B	0	0	0	0	0	0	0	0	0	0	0	0	0	0	0	0	0	0	FALSE
146	ADRA1D	0	0	0	0	0	0	0	0	0	0	0	0	0	0	0	0	0	0	FALSE
150	ADRA2A	0	0	0	0	0	0	0	0	0	0	0	0	0	0	0	0	0	0	FALSE
151	ADRA2B	0	0	0	0	0	0	0	0	0	0	0	0	0	0	0	0	0	0	FALSE
152	ADRA2C	0	0	0	0	0	0	0	0	0	0	0	0	0	0	0	0	0	0	FALSE
153	ADRB1	0	0	0	0	0	0	0	0	0	0	0	0	0	0	0	0	0	0	FALSE
154	ADRB2	0	0	0	0	0	0	0	0	0	0	0	0	0	0	0	0	0	0	FALSE
155	ADRB3	0	0	0	0	0	0	0	0	0	0	0	0	0	0	0	0	0	0	FALSE
11047	ADRM1	0	0	0	0	0	0	0	0	0	0	0	0	0	0	0	0	0	0	FALSE
158	ADSL	0	1	0	1	0	1	0	1	0	1	1	1	1	1	0	1	1	11	FALSE
159	ADSS	0	0	0	0	0	0	0	0	0	0	1	0	0	0	0	0	0	1	FALSE
122622	ADSSL1	0	0	0	0	0	0	0	0	0	0	0	0	0	0	0	0	0	0	FALSE
84830	ADTRP	0	0	0	0	0	0	0	0	0	0	0	0	0	0	0	0	0	0	FALSE
165	AEBP1	0	0	0	0	0	0	0	0	0	0	0	0	0	0	0	0	0	0	FALSE
121536	AEBP2	0	0	0	0	0	0	0	0	0	0	0	0	0	0	0	0	0	0	FALSE
64782	AEN	0	0	0	0	0	0	0	0	0	0	0	0	0	0	0	0	0	0	FALSE
166	TLE5	0	0	0	0	0	0	0	0	0	0	0	0	0	0	0	0	0	0	FALSE
60312	AFAP1	0	0	0	0	0	0	0	0	0	0	0	0	0	0	0	0	0	0	FALSE
4301	AFDN	0	0	0	0	0	0	0	0	0	0	0	0	0	0	0	0	0	0	FALSE
4299	AFF1	0	0	0	0	0	0	0	0	0	0	0	0	0	0	0	0	0	0	FALSE
2334	AFF2	0	0	0	0	0	0	0	0	0	0	0	0	0	0	0	0	0	0	FALSE
3899	AFF3	0	0	0	0	0	0	0	0	0	0	0	0	0	0	0	0	0	0	FALSE
27125	AFF4	0	0	0	0	0	0	0	0	0	0	0	0	0	0	0	0	0	0	FALSE
246269	AFG1L	0	0	0	0	0	0	0	0	0	0	0	0	0	0	0	0	0	0	FALSE
10939	AFG3L2	1	1	1	1	1	1	1	1	1	1	1	1	1	1	1	1	1	17	TRUE
173	AFM	0	0	0	0	0	0	0	0	0	0	0	0	0	0	0	0	0	0	FALSE
125061	AFMID	0	0	0	0	0	0	0	0	0	0	0	0	0	0	0	0	0	0	FALSE
174	AFP	0	0	0	0	0	0	0	0	0	0	0	0	0	0	0	0	0	0	FALSE
54812	AFTPH	0	0	0	0	0	0	0	0	0	0	0	0	0	0	0	0	0	0	FALSE
175	AGA	0	0	0	0	0	0	0	0	0	0	0	0	0	0	0	0	0	0	FALSE
116987	AGAP1	0	0	0	0	0	0	0	0	0	0	0	0	0	0	0	0	0	0	FALSE
116986	AGAP2	0	0	0	0	0	0	0	0	0	0	0	0	0	0	0	0	0	0	FALSE
116988	AGAP3	0	0	0	0	0	0	0	0	0	0	0	0	0	0	0	0	0	0	FALSE
119016	AGAP4	0	0	0	0	0	0	0	0	0	0	0	0	0	0	0	0	0	0	FALSE
729092	AGAP5	0	0	0	0	0	0	0	0	0	0	0	0	0	0	0	0	0	0	FALSE
414189	AGAP6	1	1	1	1	1	1	0	0	0	1	0	1	0	0	1	0	1	10	FALSE
642517	AGAP9	0	0	0	0	0	0	0	0	0	0	0	0	0	0	0	0	0	0	FALSE
79841	AGBL2	0	0	0	0	0	0	0	0	0	0	0	0	0	0	0	0	0	0	FALSE
340351	AGBL3	0	0	0	0	0	0	0	0	0	0	0	0	0	0	0	0	0	0	FALSE
60509	AGBL5	0	0	0	0	0	0	0	0	0	0	0	0	0	0	0	0	0	0	FALSE
177	AGER	0	0	0	0	0	0	0	0	0	0	0	0	0	0	0	0	0	0	FALSE
3267	AGFG1	0	0	0	0	0	0	0	0	0	0	0	0	0	0	0	0	0	0	FALSE
3268	AGFG2	0	0	0	0	0	0	0	0	0	0	0	0	0	0	0	0	0	0	FALSE
55109	AGGF1	0	0	0	0	0	0	0	0	0	0	0	0	0	0	0	0	0	0	FALSE
55750	AGK	0	0	0	0	0	0	0	0	0	0	0	0	0	0	0	0	0	0	FALSE
178	AGL	0	0	0	0	0	0	0	0	0	0	0	0	0	0	0	0	0	0	FALSE
79814	AGMAT	0	0	0	0	0	0	0	0	0	0	0	0	0	0	0	0	0	0	FALSE
392636	AGMO	0	0	0	0	0	0	0	0	0	0	0	0	0	0	0	0	0	0	FALSE
26523	AGO1	0	0	0	0	0	0	0	0	0	0	0	0	0	0	0	0	0	0	FALSE
27161	AGO2	0	0	0	0	0	0	0	0	0	0	0	0	0	0	0	0	0	0	FALSE
192669	AGO3	0	0	0	0	0	0	0	0	0	0	0	0	0	0	0	0	0	0	FALSE
192670	AGO4	0	0	0	0	0	0	0	0	0	0	0	0	0	0	0	0	0	0	FALSE
10554	AGPAT1	0	0	0	0	0	0	0	0	0	0	0	0	0	0	0	0	0	0	FALSE
10555	AGPAT2	0	0	0	0	0	0	0	0	0	0	0	0	0	0	0	0	0	0	FALSE
56894	AGPAT3	0	0	0	0	0	0	0	0	0	0	0	0	0	0	0	0	0	0	FALSE
56895	AGPAT4	0	0	0	0	0	0	0	0	0	0	0	0	0	0	0	0	0	0	FALSE
55326	AGPAT5	0	0	0	0	0	0	0	0	0	0	0	0	0	0	0	0	0	0	FALSE
8540	AGPS	0	0	0	0	0	0	0	0	0	0	0	0	0	0	0	0	0	0	FALSE
10551	AGR2	0	0	0	0	0	0	0	0	0	0	0	0	0	0	0	0	0	0	FALSE
155465	AGR3	0	0	0	0	0	0	0	0	0	0	0	0	0	0	0	0	0	0	FALSE
375790	AGRN	0	0	0	0	0	0	0	0	0	0	0	0	0	0	0	0	0	0	FALSE
181	AGRP	0	0	0	0	0	0	0	0	0	0	0	0	0	0	0	0	0	0	FALSE
183	AGT	0	0	0	0	0	0	0	0	0	0	0	0	0	0	0	0	0	0	FALSE
23287	AGTPBP1	0	0	0	0	0	0	0	0	0	0	0	0	0	0	0	0	0	0	FALSE
185	AGTR1	0	0	0	0	0	0	0	0	0	0	0	0	0	0	0	0	0	0	FALSE
186	AGTR2	0	0	0	0	0	0	0	0	0	0	0	0	0	0	0	0	0	0	FALSE
57085	AGTRAP	0	0	0	0	0	0	0	0	0	0	0	0	0	0	0	0	0	0	FALSE
189	AGXT	0	0	0	0	0	0	0	0	0	0	0	0	0	0	0	0	0	0	FALSE
64902	AGXT2	0	0	0	0	0	0	0	0	0	0	0	0	0	0	0	0	0	0	FALSE
25909	AHCTF1	1	1	1	1	1	1	1	1	1	1	1	1	1	1	1	1	1	17	TRUE
191	AHCY	1	1	0	1	0	1	1	1	1	1	1	0	1	1	0	0	1	12	FALSE
10768	AHCYL1	0	0	0	0	0	0	0	0	0	0	0	0	0	0	0	0	0	0	FALSE
23382	AHCYL2	0	0	0	0	0	0	0	0	0	0	0	0	0	0	0	0	0	0	FALSE
54806	AHI1	0	0	0	0	0	0	0	0	0	0	0	0	0	0	0	0	0	0	FALSE
79026	AHNAK	0	0	0	0	0	0	0	0	0	0	0	0	0	0	0	0	0	0	FALSE
196	AHR	0	0	0	0	0	0	0	0	0	0	0	0	0	0	0	0	0	0	FALSE
57491	AHRR	0	0	0	0	0	0	0	0	0	0	0	0	0	0	0	0	0	0	FALSE
10598	AHSA1	0	0	0	0	0	0	0	0	0	0	0	0	0	0	0	0	0	0	FALSE
197	AHSG	0	0	0	0	0	0	0	0	0	0	0	0	0	0	0	0	0	0	FALSE
51327	AHSP	0	0	0	0	0	0	0	0	0	0	0	0	0	0	0	0	0	0	FALSE
57379	AICDA	0	0	0	0	0	0	0	0	0	0	0	0	0	0	0	0	0	0	FALSE
64853	AIDA	0	0	0	0	0	0	0	0	0	0	0	0	0	0	0	0	0	0	FALSE
199	AIF1	0	0	0	0	0	0	0	0	0	0	0	0	0	0	0	0	0	0	FALSE
83543	AIF1L	0	0	0	0	0	0	0	0	0	0	0	0	0	0	0	0	0	0	FALSE
9131	AIFM1	1	0	0	1	0	1	0	0	0	1	0	1	0	0	1	1	0	7	FALSE
84883	AIFM2	0	0	0	0	0	0	0	0	0	0	0	0	0	0	0	0	0	0	FALSE
150209	AIFM3	0	0	0	0	0	0	0	0	0	0	0	0	0	0	0	0	0	0	FALSE
51390	AIG1	0	0	0	0	0	0	0	0	0	0	0	0	0	0	0	0	0	0	FALSE
9447	AIM2	0	0	0	0	0	0	0	0	0	0	0	0	0	0	0	0	0	0	FALSE
9255	AIMP1	0	0	0	0	0	0	0	0	0	0	0	0	0	0	0	0	0	0	FALSE
7965	AIMP2	0	0	0	0	0	0	0	0	0	0	0	0	0	0	0	0	0	0	FALSE
9049	AIP	0	0	0	0	0	0	0	0	0	0	0	0	0	0	0	0	0	0	FALSE
23746	AIPL1	0	0	0	0	0	0	0	0	0	0	0	0	0	0	0	0	0	0	FALSE
326	AIRE	0	0	0	0	0	0	0	0	0	0	0	0	0	0	0	0	0	0	FALSE
55966	AJAP1	0	0	0	0	0	0	0	0	0	0	0	0	0	0	0	0	0	0	FALSE
84962	AJUBA	0	0	0	0	0	0	0	0	0	0	0	0	0	0	0	0	0	0	FALSE
203	AK1	0	0	0	0	0	0	0	0	0	0	0	0	0	0	0	0	0	0	FALSE
204	AK2	0	0	0	0	0	0	0	0	0	0	0	0	0	0	0	0	0	0	FALSE
50808	AK3	0	0	0	0	0	0	0	0	0	0	0	0	0	0	0	0	0	0	FALSE
205	AK4	0	0	0	0	0	0	0	0	0	0	0	0	0	0	0	0	0	0	FALSE
26289	AK5	0	0	0	0	0	0	0	0	0	0	0	0	0	0	0	0	0	0	FALSE
122481	AK7	0	0	0	0	0	0	0	0	0	0	0	0	0	0	0	0	0	0	FALSE
158067	AK8	0	0	0	0	0	0	0	0	0	0	0	0	0	0	0	0	0	0	FALSE
221264	AK9	0	0	0	0	0	0	0	0	0	0	0	0	0	0	0	0	0	0	FALSE
8165	AKAP1	0	0	0	0	0	0	0	0	0	0	0	0	0	0	0	0	0	0	FALSE
11216	AKAP10	0	0	0	0	0	0	0	0	0	0	0	0	0	0	0	0	0	0	FALSE
11215	AKAP11	0	0	0	0	0	0	0	0	0	0	0	0	0	0	0	0	0	0	FALSE
9590	AKAP12	0	0	0	0	0	0	0	0	0	0	0	0	0	0	0	0	0	0	FALSE
11214	AKAP13	0	0	0	0	0	0	0	0	0	0	0	0	0	0	0	0	0	0	FALSE
158798	AKAP14	0	0	0	0	0	0	0	0	0	0	0	0	0	0	0	0	0	0	FALSE
8227	AKAP17A	0	0	0	0	0	0	0	0	0	0	0	0	0	0	0	0	0	0	FALSE
11217	AKAP2	0	0	0	0	0	0	0	0	0	0	0	0	0	0	0	0	0	0	FALSE
10566	AKAP3	0	0	0	0	0	0	0	0	0	0	0	0	0	0	0	0	0	0	FALSE
9495	AKAP5	0	0	0	0	0	0	0	0	0	0	0	0	0	0	0	0	0	0	FALSE
9472	AKAP6	0	0	0	0	0	0	0	0	0	0	0	0	0	0	0	0	0	0	FALSE
9465	AKAP7	0	0	0	0	0	0	0	0	0	0	0	0	0	0	0	0	0	0	FALSE
10270	AKAP8	0	0	0	0	0	0	0	0	0	0	0	0	0	0	0	0	0	0	FALSE
26993	AKAP8L	0	0	0	0	0	0	0	0	0	0	0	0	0	0	0	0	0	0	FALSE
10142	AKAP9	0	0	0	0	0	0	0	0	0	0	0	0	0	0	0	0	0	0	FALSE
56672	AKIP1	0	0	0	0	0	0	0	0	0	0	0	0	0	0	0	0	0	0	FALSE
79647	AKIRIN1	0	0	0	0	0	0	0	0	0	0	0	0	0	0	0	0	0	0	FALSE
80709	AKNA	0	0	0	0	0	0	0	0	0	0	0	0	0	0	0	0	0	0	FALSE
10327	AKR1A1	0	0	0	0	0	0	0	0	0	0	0	0	0	0	0	0	0	0	FALSE
231	AKR1B1	0	0	0	0	0	0	0	0	0	0	0	0	0	0	0	0	0	0	FALSE
57016	AKR1B10	0	0	0	0	0	0	0	0	0	0	0	0	0	0	0	0	0	0	FALSE
441282	AKR1B15	0	0	0	0	0	0	0	0	0	0	0	0	0	0	0	0	0	0	FALSE
1645	AKR1C1	0	0	0	0	0	0	0	0	0	0	0	0	0	0	0	0	0	0	FALSE
1646	AKR1C2	0	0	0	0	0	0	0	0	0	0	0	0	0	0	0	0	0	0	FALSE
8644	AKR1C3	0	0	0	0	0	0	0	0	0	0	0	0	0	0	0	0	0	0	FALSE
1109	AKR1C4	0	0	0	0	0	0	0	0	0	0	0	0	0	0	0	0	0	0	FALSE
6718	AKR1D1	0	0	0	0	0	0	0	0	0	0	0	0	0	0	0	0	0	0	FALSE
83592	AKR1E2	0	0	0	0	0	0	0	0	0	0	0	0	0	0	0	0	0	0	FALSE
8574	AKR7A2	0	0	0	0	0	0	0	0	0	0	0	0	0	0	0	0	0	0	FALSE
22977	AKR7A3	0	0	0	0	0	0	0	0	0	0	0	0	0	0	0	0	0	0	FALSE
246181	AKR7L	0	0	0	0	0	0	0	0	0	0	0	0	0	0	0	0	0	0	FALSE
207	AKT1	0	0	0	0	0	0	0	0	0	0	0	0	0	0	0	0	0	0	FALSE
84335	AKT1S1	0	0	0	0	0	0	0	0	0	0	0	0	0	0	0	0	0	0	FALSE
208	AKT2	0	0	0	0	0	0	0	0	0	0	0	0	0	0	0	0	0	0	FALSE
10000	AKT3	0	0	0	0	0	0	0	0	0	0	0	0	0	0	0	0	0	0	FALSE
64400	AKTIP	0	0	0	0	0	0	0	0	0	0	0	0	0	0	0	0	0	0	FALSE
210	ALAD	0	0	0	0	0	0	0	0	0	0	0	0	0	0	0	0	0	0	FALSE
211	ALAS1	0	0	0	0	0	0	0	0	0	0	0	0	0	0	0	0	0	0	FALSE
212	ALAS2	0	0	0	0	0	0	0	0	0	0	0	0	0	0	0	0	0	0	FALSE
213	ALB	0	0	0	0	0	0	0	0	0	0	0	0	0	0	0	0	0	0	FALSE
214	ALCAM	0	0	0	0	0	0	0	0	0	0	0	0	0	0	0	0	0	0	FALSE
126133	ALDH16A1	0	0	0	0	0	0	0	0	0	0	0	0	0	0	0	0	0	0	FALSE
5832	ALDH18A1	0	0	0	0	0	0	0	0	0	0	0	0	0	0	0	0	0	0	FALSE
216	ALDH1A1	0	0	0	0	0	0	0	0	0	0	0	0	0	0	0	0	0	0	FALSE
8854	ALDH1A2	0	0	0	0	0	0	0	0	0	0	0	0	0	0	0	0	0	0	FALSE
220	ALDH1A3	0	0	0	0	0	0	0	0	0	0	0	0	0	0	0	0	0	0	FALSE
219	ALDH1B1	0	0	0	0	0	0	0	0	0	0	0	0	0	0	0	0	0	0	FALSE
10840	ALDH1L1	0	0	0	0	0	0	0	0	0	0	0	0	0	0	0	0	0	0	FALSE
160428	ALDH1L2	0	0	0	0	0	0	0	0	0	0	0	0	0	0	0	0	0	0	FALSE
217	ALDH2	0	0	0	0	0	0	0	0	0	0	0	0	0	0	0	0	0	0	FALSE
218	ALDH3A1	0	0	0	0	0	0	0	0	0	0	0	0	0	0	0	0	0	0	FALSE
222	ALDH3B2	0	0	0	0	0	0	0	0	0	0	0	0	0	0	0	0	0	0	FALSE
8659	ALDH4A1	0	0	0	0	0	0	0	0	0	0	0	0	0	0	0	0	0	0	FALSE
7915	ALDH5A1	0	0	0	0	0	0	0	0	0	0	0	0	0	0	0	0	0	0	FALSE
501	ALDH7A1	0	0	0	0	0	0	0	0	0	0	0	0	0	0	0	0	0	0	FALSE
64577	ALDH8A1	0	0	0	0	0	0	0	0	0	0	0	0	0	0	0	0	0	0	FALSE
223	ALDH9A1	0	0	0	0	0	0	0	0	0	0	0	0	0	0	0	0	0	0	FALSE
226	ALDOA	1	1	1	1	1	1	1	1	1	1	1	1	1	1	1	1	1	17	TRUE
229	ALDOB	0	0	0	0	0	0	0	0	0	0	0	0	0	0	0	0	0	0	FALSE
230	ALDOC	0	0	0	0	0	0	0	0	0	0	0	0	0	0	0	0	0	0	FALSE
56052	ALG1	1	1	1	1	1	1	0	1	1	1	1	1	1	1	1	1	1	16	TRUE
84920	ALG10	0	0	0	0	0	0	0	0	0	0	0	0	0	0	0	0	0	0	FALSE
144245	ALG10B	0	0	0	0	0	0	0	0	0	0	0	0	0	0	0	0	0	0	FALSE
440138	ALG11	1	1	1	1	1	1	1	1	1	1	1	1	1	1	1	1	1	17	TRUE
79087	ALG12	0	0	0	0	0	0	0	0	0	0	0	0	0	0	0	0	0	0	FALSE
79868	ALG13	1	1	1	1	0	1	0	1	1	1	1	1	1	1	1	1	1	15	TRUE
200810	ALG1L	0	0	1	0	0	0	0	1	0	1	1	0	1	0	1	0	1	7	FALSE
85365	ALG2	1	1	1	1	1	1	1	1	1	1	1	1	1	1	1	1	1	17	TRUE
10195	ALG3	0	0	0	0	0	0	0	0	0	0	0	0	0	0	0	0	0	0	FALSE
29880	ALG5	0	0	0	0	0	0	0	0	0	0	0	0	0	0	0	0	0	0	FALSE
29929	ALG6	0	0	0	0	0	0	0	0	0	0	0	0	0	0	0	0	0	0	FALSE
79053	ALG8	0	0	0	0	0	0	0	0	0	0	0	0	0	0	0	0	0	0	FALSE
79796	ALG9	0	0	0	0	0	0	0	0	0	0	0	0	0	0	0	0	0	0	FALSE
238	ALK	0	0	0	0	0	0	0	0	0	0	0	0	0	0	0	0	0	0	FALSE
389658	ALKAL1	0	0	0	0	0	0	0	0	0	0	0	0	0	0	0	0	0	0	FALSE
8846	ALKBH1	0	0	0	0	0	0	0	0	0	0	0	0	0	0	0	0	0	0	FALSE
121642	ALKBH2	0	0	0	0	0	0	0	0	0	0	0	0	0	0	0	0	0	0	FALSE
221120	ALKBH3	0	0	0	0	0	0	0	0	0	0	0	0	0	0	0	0	0	0	FALSE
54784	ALKBH4	0	0	0	0	0	0	0	0	0	0	0	0	0	0	0	0	0	0	FALSE
54890	ALKBH5	0	0	0	0	0	0	0	0	0	0	0	0	0	0	0	0	0	0	FALSE
84266	ALKBH7	0	0	0	0	0	0	0	0	0	0	0	0	0	0	0	0	0	0	FALSE
91801	ALKBH8	0	0	0	0	0	0	0	0	0	0	0	0	0	0	0	0	0	0	FALSE
55821	ALLC	0	0	0	0	0	0	0	0	0	0	0	0	0	0	0	0	0	0	FALSE
7840	ALMS1	0	0	0	0	0	0	0	0	0	0	0	0	0	0	0	0	0	0	FALSE
239	ALOX12	0	0	0	0	0	0	0	0	0	0	0	0	0	0	0	0	0	0	FALSE
242	ALOX12B	0	0	0	0	0	0	0	0	0	0	0	0	0	0	0	0	0	0	FALSE
246	ALOX15	0	0	0	0	0	0	0	0	0	0	0	0	0	0	0	0	0	0	FALSE
247	ALOX15B	0	0	0	0	0	0	0	0	0	0	0	0	0	0	0	0	0	0	FALSE
240	ALOX5	0	0	0	0	0	0	0	0	0	0	0	0	0	0	0	0	0	0	FALSE
241	ALOX5AP	0	0	0	0	0	0	0	0	0	0	0	0	0	0	0	0	0	0	FALSE
59344	ALOXE3	0	0	0	0	0	0	0	0	0	0	0	0	0	0	0	0	0	0	FALSE
251	ALPG	0	0	0	0	0	0	0	0	0	0	0	0	0	0	0	0	0	0	FALSE
248	ALPI	0	0	0	0	0	0	0	0	0	0	0	0	0	0	0	0	0	0	FALSE
80216	ALPK1	0	0	0	0	0	0	0	0	0	0	0	0	0	0	0	0	0	0	FALSE
115701	ALPK2	0	0	0	0	0	0	0	0	0	0	0	0	0	0	0	0	0	0	FALSE
57538	ALPK3	0	0	0	0	0	0	0	0	0	0	0	0	0	0	0	0	0	0	FALSE
249	ALPL	0	0	0	0	0	0	0	0	0	0	0	0	0	0	0	0	0	0	FALSE
250	ALPP	0	0	0	0	0	0	0	0	0	0	0	0	0	0	0	0	0	0	FALSE
57679	ALS2	0	0	0	0	0	0	0	0	0	0	0	0	0	0	0	0	0	0	FALSE
259173	ALS2CL	0	0	0	0	0	0	0	0	0	0	0	0	0	0	0	0	0	0	FALSE
130540	FLACC1	0	0	0	0	0	0	0	0	0	0	0	0	0	0	0	0	0	0	FALSE
8092	ALX1	0	0	0	0	0	0	0	0	0	0	0	0	0	0	0	0	0	0	FALSE
257	ALX3	0	0	0	0	0	0	0	0	0	0	0	0	0	0	0	0	0	0	FALSE
60529	ALX4	0	0	0	0	0	0	0	0	0	0	0	0	0	0	0	0	0	0	FALSE
10189	ALYREF	1	1	1	1	1	1	1	1	1	1	1	1	1	1	1	1	1	17	TRUE
23600	AMACR	0	0	0	0	0	0	0	0	0	0	0	0	0	0	0	0	0	0	FALSE
258	AMBN	0	0	0	0	0	0	0	0	0	0	0	0	0	0	0	0	0	0	FALSE
259	AMBP	0	0	0	0	0	0	0	0	0	0	0	0	0	0	0	0	0	0	FALSE
55626	AMBRA1	0	0	0	0	0	0	0	0	0	0	0	0	0	0	0	0	0	0	FALSE
262	AMD1	0	0	0	0	0	0	0	0	0	0	0	0	0	0	0	0	0	0	FALSE
144193	AMDHD1	0	0	0	0	0	0	0	0	0	0	0	0	0	0	0	0	0	0	FALSE
51005	AMDHD2	0	0	0	0	0	0	0	0	0	0	0	0	0	0	0	0	0	0	FALSE
265	AMELX	0	0	0	0	0	0	0	0	0	0	0	0	0	0	0	0	0	0	FALSE
139285	AMER1	0	0	0	0	0	0	0	0	0	0	0	0	0	0	0	0	0	0	FALSE
205147	AMER3	0	0	0	0	0	0	0	0	0	0	0	0	0	0	0	0	0	0	FALSE
267	AMFR	0	0	0	0	0	0	0	0	0	0	0	0	0	0	0	0	0	0	FALSE
268	AMH	0	0	0	0	0	0	0	0	0	0	0	0	0	0	0	0	0	0	FALSE
269	AMHR2	0	0	0	0	0	0	0	0	0	0	0	0	0	0	0	0	0	0	FALSE
57463	AMIGO1	0	0	0	0	0	0	0	0	0	0	0	0	0	0	0	0	0	0	FALSE
347902	AMIGO2	0	0	0	0	0	0	0	0	0	0	0	0	0	0	0	0	0	0	FALSE
386724	AMIGO3	0	0	0	0	0	0	0	0	0	0	0	0	0	0	0	0	0	0	FALSE
9949	AMMECR1	0	0	0	0	0	0	0	0	0	0	0	0	0	0	0	0	0	0	FALSE
81693	AMN	0	0	0	0	0	0	0	0	0	0	0	0	0	0	0	0	0	0	FALSE
196394	AMN1	0	0	0	0	0	0	0	0	0	0	0	0	0	0	0	0	0	0	FALSE
154796	AMOT	0	0	0	0	0	0	0	0	0	0	0	0	0	0	0	0	0	0	FALSE
154810	AMOTL1	0	0	0	0	0	0	0	0	0	0	0	0	0	0	0	0	0	0	FALSE
51421	AMOTL2	0	0	0	0	0	0	0	0	0	0	0	0	0	0	0	0	0	0	FALSE
270	AMPD1	0	0	0	0	0	0	0	0	0	0	0	0	0	0	0	0	0	0	FALSE
271	AMPD2	0	0	0	0	0	0	0	0	0	0	0	0	0	0	0	0	0	0	FALSE
272	AMPD3	0	0	0	0	0	0	0	0	0	0	0	0	0	0	0	0	0	0	FALSE
273	AMPH	0	0	0	0	0	0	0	0	0	0	0	0	0	0	0	0	0	0	FALSE
275	AMT	0	0	0	0	0	0	0	0	0	0	0	0	0	0	0	0	0	0	FALSE
401138	AMTN	0	0	0	0	0	0	0	0	0	0	0	0	0	0	0	0	0	0	FALSE
279	AMY2A	0	0	0	0	0	0	0	0	0	0	0	0	0	0	0	0	0	0	FALSE
280	AMY2B	0	0	0	0	0	0	0	0	0	0	0	0	0	0	0	0	0	0	FALSE
155185	AMZ1	0	0	0	0	0	0	0	0	0	0	0	0	0	0	0	0	0	0	FALSE
51321	AMZ2	0	0	0	0	0	0	0	0	0	0	0	0	0	0	0	0	0	0	FALSE
64682	ANAPC1	1	1	1	1	1	1	1	1	1	1	1	1	1	1	1	1	1	17	TRUE
10393	ANAPC10	0	0	0	0	0	0	0	0	0	0	0	0	0	0	0	0	0	0	FALSE
51529	ANAPC11	1	1	1	1	1	1	1	1	1	1	1	1	1	1	1	1	1	17	TRUE
25906	ANAPC15	1	1	0	1	0	1	0	1	0	1	0	1	0	0	1	0	1	9	FALSE
29882	ANAPC2	1	1	1	1	1	1	1	1	1	1	1	1	1	1	1	1	1	17	TRUE
29945	ANAPC4	1	1	1	1	1	1	1	1	1	1	1	1	1	1	1	1	1	17	TRUE
51433	ANAPC5	1	1	1	1	1	1	1	1	1	1	1	1	1	1	1	1	1	17	TRUE
51434	ANAPC7	0	0	0	0	0	0	0	0	0	0	0	0	0	0	0	0	0	0	FALSE
283	ANG	0	0	0	0	0	0	0	0	0	0	0	0	0	0	0	0	0	0	FALSE
23357	ANGEL1	0	0	0	0	0	0	0	0	0	0	0	0	0	0	0	0	0	0	FALSE
90806	ANGEL2	0	0	0	0	0	0	0	0	0	0	0	0	0	0	0	0	0	0	FALSE
285	ANGPT2	0	0	0	0	0	0	0	0	0	0	0	0	0	0	0	0	0	0	FALSE
51378	ANGPT4	0	0	0	0	0	0	0	0	0	0	0	0	0	0	0	0	0	0	FALSE
9068	ANGPTL1	0	0	0	0	0	0	0	0	0	0	0	0	0	0	0	0	0	0	FALSE
23452	ANGPTL2	0	0	0	0	0	0	0	0	0	0	0	0	0	0	0	0	0	0	FALSE
51129	ANGPTL4	0	0	0	0	0	0	0	0	0	0	0	0	0	0	0	0	0	0	FALSE
253935	ANGPTL5	0	0	0	0	0	0	0	0	0	0	0	0	0	0	0	0	0	0	FALSE
83854	ANGPTL6	0	0	0	0	0	0	0	0	0	0	0	0	0	0	0	0	0	0	FALSE
10218	ANGPTL7	0	0	0	0	0	0	0	0	0	0	0	0	0	0	0	0	0	0	FALSE
55908	ANGPTL8	0	0	0	0	0	0	0	0	0	0	0	0	0	0	0	0	0	0	FALSE
286	ANK1	0	0	0	0	0	0	0	0	0	0	0	0	0	0	0	0	0	0	FALSE
287	ANK2	0	0	0	0	0	0	0	0	0	0	0	0	0	0	0	0	0	0	FALSE
288	ANK3	0	0	0	0	0	0	0	0	0	0	0	0	0	0	0	0	0	0	FALSE
150709	ANKAR	0	0	0	0	0	0	0	0	0	0	0	0	0	0	0	0	0	0	FALSE
63926	ANKEF1	0	0	0	0	0	0	0	0	0	0	0	0	0	0	0	0	0	0	FALSE
162282	ANKFN1	0	0	0	0	0	0	0	0	0	0	0	0	0	0	0	0	0	0	FALSE
51479	ANKFY1	0	0	0	0	0	0	0	0	0	0	0	0	0	0	0	0	0	0	FALSE
56172	ANKH	0	0	0	0	0	0	0	0	0	0	0	0	0	0	0	0	0	0	FALSE
54882	ANKHD1	0	0	0	0	0	0	0	0	0	0	0	0	0	0	0	0	0	0	FALSE
54467	ANKIB1	0	0	0	0	0	0	0	0	0	0	0	0	0	0	0	0	0	0	FALSE
255239	ANKK1	0	0	0	0	0	0	0	0	0	0	0	0	0	0	0	0	0	0	FALSE
126549	ANKLE1	0	0	0	0	0	0	0	0	0	0	0	0	0	0	0	0	0	0	FALSE
23141	ANKLE2	1	1	1	1	1	1	1	1	1	1	1	1	1	1	1	1	1	17	TRUE
51281	ANKMY1	0	0	0	0	0	0	0	0	0	0	0	0	0	0	0	0	0	0	FALSE
57037	ANKMY2	0	0	0	0	0	0	0	0	0	0	0	0	0	0	0	0	0	0	FALSE
57763	ANKRA2	0	0	0	0	0	0	0	0	0	0	0	0	0	0	0	0	0	0	FALSE
27063	ANKRD1	0	0	0	0	0	0	0	0	0	0	0	0	0	0	0	0	0	0	FALSE
55608	ANKRD10	0	0	0	0	0	0	0	0	0	0	0	0	0	0	0	0	0	0	FALSE
29123	ANKRD11	0	0	0	0	0	0	0	0	0	0	0	0	0	0	0	0	0	0	FALSE
23253	ANKRD12	0	0	0	0	0	0	0	0	0	0	0	0	0	0	0	0	0	0	FALSE
88455	ANKRD13A	0	0	0	0	0	0	0	0	0	0	0	0	0	0	0	0	0	0	FALSE
124930	ANKRD13B	0	0	0	0	0	0	0	0	0	0	0	0	0	0	0	0	0	0	FALSE
81573	ANKRD13C	0	0	0	0	0	0	0	0	0	0	0	0	0	0	0	0	0	0	FALSE
338692	ANKRD13D	0	0	0	0	0	0	0	0	0	0	0	0	0	0	0	0	0	0	FALSE
54522	ANKRD16	0	0	0	0	0	0	0	0	0	0	0	0	0	0	0	0	0	0	FALSE
26057	ANKRD17	0	0	0	0	0	0	0	0	0	0	0	0	0	0	0	0	0	0	FALSE
253650	ANKRD18A	0	0	0	0	0	0	0	0	0	0	0	0	0	0	0	0	0	0	FALSE
26287	ANKRD2	0	0	0	0	0	0	0	0	0	0	0	0	0	0	0	0	0	0	FALSE
118932	ANKRD22	0	0	0	0	0	0	0	0	0	0	0	0	0	0	0	0	0	0	FALSE
200539	ANKRD23	0	0	0	0	0	0	0	0	0	0	0	0	0	0	0	0	0	0	FALSE
170961	ANKRD24	0	0	0	0	0	0	0	0	0	0	0	0	0	0	0	0	0	0	FALSE
22852	ANKRD26	0	0	0	0	0	0	0	0	0	0	0	0	0	0	0	0	0	0	FALSE
84079	ANKRD27	0	0	0	0	0	0	0	0	0	0	0	0	0	0	0	0	0	0	FALSE
23243	ANKRD28	0	0	0	0	0	0	0	0	0	0	0	0	0	0	0	0	0	0	FALSE
147463	ANKRD29	0	0	0	0	0	0	0	0	0	0	0	0	0	0	0	0	0	0	FALSE
91074	ANKRD30A	0	0	0	0	0	0	0	0	0	0	0	0	0	0	0	0	0	0	FALSE
374860	ANKRD30B	0	0	0	0	0	0	0	0	0	0	0	0	0	0	0	0	0	0	FALSE
256006	ANKRD31	0	0	0	0	0	0	0	0	0	0	0	0	0	0	0	0	0	0	FALSE
341405	ANKRD33	0	0	0	0	0	0	0	0	0	0	0	0	0	0	0	0	0	0	FALSE
651746	ANKRD33B	0	0	0	0	0	0	0	0	0	0	0	0	0	0	0	0	0	0	FALSE
340120	ANKRD34B	0	0	0	0	0	0	0	0	0	0	0	0	0	0	0	0	0	0	FALSE
390616	ANKRD34C	0	0	0	0	0	0	0	0	0	0	0	0	0	0	0	0	0	0	FALSE
148741	ANKRD35	0	0	0	0	0	0	0	0	0	0	0	0	0	0	0	0	0	0	FALSE
57730	ANKRD36B	1	1	1	1	1	0	1	1	1	1	0	1	1	0	1	0	1	13	FALSE
353322	ANKRD37	0	0	0	0	0	0	0	0	0	0	0	0	0	0	0	0	0	0	FALSE
91369	ANKRD40	0	0	0	0	0	0	0	0	0	0	0	0	0	0	0	0	0	0	FALSE
338699	ANKRD42	0	0	0	0	0	0	0	0	0	0	0	0	0	0	0	0	0	0	FALSE
91526	ANKRD44	0	0	0	0	0	0	0	0	0	0	0	0	0	0	0	0	0	0	FALSE
339416	ANKRD45	0	0	0	0	0	0	0	0	0	0	0	0	0	0	0	0	0	0	FALSE
157567	ANKRD46	0	0	0	0	0	0	0	0	0	0	0	0	0	0	0	0	0	0	FALSE
54851	ANKRD49	0	0	0	0	1	0	0	0	0	1	0	0	1	0	1	0	0	4	FALSE
57182	ANKRD50	0	0	0	0	0	0	0	0	0	0	0	0	0	0	0	0	0	0	FALSE
79998	ANKRD53	0	0	0	0	0	0	0	0	0	0	0	0	0	0	0	0	0	0	FALSE
22881	ANKRD6	0	0	0	0	0	0	0	0	0	0	0	0	0	0	0	0	0	0	FALSE
342850	ANKRD62	0	0	0	0	0	0	0	0	0	0	0	0	0	0	0	0	0	0	FALSE
441869	ANKRD65	0	0	0	0	0	0	0	0	0	0	0	0	0	0	0	0	0	0	FALSE
100287718	ANKRD66	0	0	0	0	0	0	0	0	0	0	0	0	0	0	0	0	0	0	FALSE
56311	ANKRD7	0	0	0	0	0	0	0	0	0	0	0	0	0	0	0	0	0	0	FALSE
23294	ANKS1A	0	0	0	0	0	0	0	0	0	0	0	0	0	0	0	0	0	0	FALSE
124401	ANKS3	0	0	0	0	0	0	0	0	0	0	0	0	0	0	0	0	0	0	FALSE
257629	ANKS4B	0	0	0	0	0	0	0	0	0	0	0	0	0	0	0	0	0	0	FALSE
203286	ANKS6	0	0	0	0	0	0	0	0	0	0	0	0	0	0	0	0	0	0	FALSE
55139	ANKZF1	0	0	0	0	0	0	0	0	0	0	0	0	0	0	0	0	0	0	FALSE
54443	ANLN	0	0	0	0	0	0	0	0	0	1	0	0	0	0	1	0	1	3	FALSE
55107	ANO1	0	0	0	0	0	0	0	0	0	0	0	0	0	0	0	0	0	0	FALSE
55129	ANO10	0	0	0	0	0	0	0	0	0	0	0	0	0	0	0	0	0	0	FALSE
57101	ANO2	0	0	0	0	0	0	0	0	0	0	0	0	0	0	0	0	0	0	FALSE
63982	ANO3	0	0	0	0	0	0	0	0	0	0	0	0	0	0	0	0	0	0	FALSE
203859	ANO5	0	0	0	0	0	0	0	0	0	0	0	0	0	0	0	0	0	0	FALSE
196527	ANO6	0	0	0	0	0	0	0	0	0	0	0	0	0	0	0	0	0	0	FALSE
57719	ANO8	0	0	0	0	0	0	0	0	0	0	0	0	0	0	0	0	0	0	FALSE
3730	ANOS1	0	0	0	0	0	0	0	0	0	0	0	0	0	0	0	0	0	0	FALSE
8125	ANP32A	0	0	0	0	0	0	0	0	0	0	0	0	0	0	0	0	0	0	FALSE
10541	ANP32B	0	0	0	0	0	0	0	0	0	0	0	0	0	0	0	0	0	0	FALSE
23519	ANP32D	0	0	0	0	0	0	0	0	0	0	0	0	0	0	0	0	0	0	FALSE
81611	ANP32E	0	0	0	0	0	0	0	0	0	0	0	0	0	0	0	0	0	0	FALSE
290	ANPEP	0	0	0	0	0	0	0	0	0	0	0	0	0	0	0	0	0	0	FALSE
84168	ANTXR1	0	0	0	0	0	0	0	0	0	0	0	0	0	0	0	0	0	0	FALSE
118429	ANTXR2	0	0	0	0	0	0	0	0	0	0	0	0	0	0	0	0	0	0	FALSE
195977	ANTXRL	0	0	0	0	0	0	0	0	0	0	0	0	0	0	0	0	0	0	FALSE
301	ANXA1	0	0	0	0	0	0	0	0	0	0	0	0	0	0	0	0	0	0	FALSE
11199	ANXA10	0	0	0	0	0	0	0	0	0	0	0	0	0	0	0	0	0	0	FALSE
311	ANXA11	0	0	0	0	0	0	0	0	0	0	0	0	0	0	0	0	0	0	FALSE
312	ANXA13	0	0	0	0	0	0	0	0	0	0	0	0	0	0	0	0	0	0	FALSE
302	ANXA2	0	0	0	0	0	0	0	0	0	0	0	0	0	0	0	0	0	0	FALSE
306	ANXA3	0	0	0	0	0	0	0	0	0	0	0	0	0	0	0	0	0	0	FALSE
307	ANXA4	0	0	0	0	0	0	0	0	0	0	0	0	0	0	0	0	0	0	FALSE
308	ANXA5	0	0	0	0	0	0	0	0	0	0	0	0	0	0	0	0	0	0	FALSE
309	ANXA6	0	0	0	0	0	0	0	0	0	0	0	0	0	0	0	0	0	0	FALSE
310	ANXA7	0	0	0	0	0	0	0	0	0	0	0	0	0	0	0	0	0	0	FALSE
8416	ANXA9	0	0	0	0	0	0	0	0	0	0	0	0	0	0	0	0	0	0	FALSE
313	AOAH	0	0	0	0	0	0	0	0	0	0	0	0	0	0	0	0	0	0	FALSE
26	AOC1	0	0	0	0	0	0	0	0	0	0	0	0	0	0	0	0	0	0	FALSE
314	AOC2	0	0	0	0	0	0	0	0	0	0	0	0	0	0	0	0	0	0	FALSE
8639	AOC3	0	0	0	0	0	0	0	0	0	0	0	0	0	0	0	0	0	0	FALSE
316	AOX1	0	0	0	0	0	0	0	0	0	0	0	0	0	0	0	0	0	0	FALSE
55435	AP1AR	0	0	0	0	0	0	0	0	0	0	0	0	0	0	0	0	0	0	FALSE
162	AP1B1	0	0	0	0	0	0	0	0	0	0	0	0	0	0	0	0	0	0	FALSE
164	AP1G1	0	0	0	0	0	0	0	0	0	0	0	0	0	0	0	0	0	0	FALSE
8906	AP1G2	0	0	0	0	0	0	0	0	0	0	0	0	0	0	0	0	0	0	FALSE
8907	AP1M1	0	0	0	0	0	0	0	0	0	0	0	0	0	0	0	0	0	0	FALSE
10053	AP1M2	0	0	0	0	0	0	0	0	0	0	0	0	0	0	0	0	0	0	FALSE
1174	AP1S1	0	0	0	0	0	0	0	0	0	0	0	0	0	0	0	0	0	0	FALSE
8905	AP1S2	0	0	0	0	0	0	0	0	0	0	0	0	0	0	0	0	0	0	FALSE
130340	AP1S3	0	0	0	0	0	0	0	0	0	0	0	0	0	0	0	0	0	0	FALSE
160	AP2A1	0	0	0	0	0	0	0	0	0	0	0	0	0	0	0	0	0	0	FALSE
161	AP2A2	0	0	0	0	0	0	0	0	0	0	0	0	0	0	0	0	0	0	FALSE
163	AP2B1	0	0	0	0	0	0	0	0	0	0	0	0	0	0	0	0	0	0	FALSE
1173	AP2M1	0	1	0	1	1	1	0	1	1	1	1	1	1	1	1	0	0	12	FALSE
1175	AP2S1	0	1	0	1	1	1	0	1	1	1	1	1	1	1	1	0	0	12	FALSE
8546	AP3B1	0	0	0	0	0	0	0	0	0	0	0	0	0	0	0	0	0	0	FALSE
8943	AP3D1	0	0	0	0	0	0	0	0	0	0	0	0	0	0	0	0	0	0	FALSE
26985	AP3M1	0	0	0	0	0	0	0	0	0	0	0	0	0	0	0	0	0	0	FALSE
10947	AP3M2	0	0	0	0	0	0	0	0	0	0	0	0	0	0	0	0	0	0	FALSE
1176	AP3S1	0	0	0	0	0	0	0	0	0	0	0	0	0	0	0	0	0	0	FALSE
10239	AP3S2	0	0	0	0	0	0	0	0	0	0	0	0	0	0	0	0	0	0	FALSE
10717	AP4B1	0	0	0	0	0	0	0	0	0	0	0	0	0	0	0	0	0	0	FALSE
23431	AP4E1	0	0	0	0	0	0	0	0	0	0	0	0	0	0	0	0	0	0	FALSE
9179	AP4M1	0	0	0	0	0	0	0	0	0	0	0	0	0	0	0	0	0	0	FALSE
11154	AP4S1	0	0	0	0	0	0	0	0	0	0	0	0	0	0	0	0	0	0	FALSE
55745	AP5M1	0	0	0	0	0	0	0	0	0	0	0	0	0	0	0	0	0	0	FALSE
317	APAF1	0	0	0	0	0	0	0	0	0	0	0	0	0	0	0	0	0	0	FALSE
320	APBA1	0	0	0	0	0	0	0	0	0	0	0	0	0	0	0	0	0	0	FALSE
321	APBA2	0	0	0	0	0	0	0	0	0	0	0	0	0	0	0	0	0	0	FALSE
9546	APBA3	0	0	0	0	0	0	0	0	0	0	0	0	0	0	0	0	0	0	FALSE
322	APBB1	0	0	0	0	0	0	0	0	0	0	0	0	0	0	0	0	0	0	FALSE
54518	APBB1IP	0	0	0	0	0	0	0	0	0	0	0	0	0	0	0	0	0	0	FALSE
323	APBB2	0	0	0	0	0	0	0	0	0	0	0	0	0	0	0	0	0	0	FALSE
10307	APBB3	0	0	0	0	0	0	0	0	0	0	0	0	0	0	0	0	0	0	FALSE
324	APC	0	0	0	0	0	0	0	0	0	0	0	0	0	0	0	0	0	0	FALSE
10297	APC2	0	0	0	0	0	0	0	0	0	0	0	0	0	0	0	0	0	0	FALSE
147495	APCDD1	0	0	0	0	0	0	0	0	0	0	0	0	0	0	0	0	0	0	FALSE
164284	APCDD1L	0	0	0	0	0	0	0	0	0	0	0	0	0	0	0	0	0	0	FALSE
325	APCS	0	0	0	0	0	0	0	0	0	0	0	0	0	0	0	0	0	0	FALSE
327	APEH	0	0	0	0	0	0	0	0	0	0	0	0	0	0	0	0	0	0	FALSE
328	APEX1	0	0	0	0	0	0	0	0	0	0	0	0	0	0	0	0	0	0	FALSE
27301	APEX2	0	0	0	0	0	0	0	0	0	0	0	0	0	0	0	0	0	0	FALSE
51107	APH1A	0	0	0	0	0	0	0	0	0	0	0	0	0	0	0	0	0	0	FALSE
83464	APH1B	0	0	0	0	0	0	0	0	0	0	0	0	0	0	0	0	0	0	FALSE
8539	API5	0	0	0	0	0	0	0	0	0	0	0	0	0	0	0	0	0	0	FALSE
51074	APIP	0	0	0	0	0	0	0	0	0	0	0	0	0	0	0	0	0	0	FALSE
200558	APLF	0	0	0	0	0	0	0	0	0	0	0	0	0	0	0	0	0	0	FALSE
8862	APLN	0	0	0	0	0	0	0	0	0	0	0	0	0	0	0	0	0	0	FALSE
187	APLNR	0	0	0	0	0	0	0	0	0	0	0	0	0	0	0	0	0	0	FALSE
333	APLP1	0	0	0	0	0	0	0	0	0	0	0	0	0	0	0	0	0	0	FALSE
334	APLP2	0	0	0	0	0	0	0	0	0	0	0	0	0	0	0	0	0	0	FALSE
57136	APMAP	0	0	0	0	0	0	0	0	0	0	0	0	0	0	0	0	0	0	FALSE
335	APOA1	0	0	0	0	0	0	0	0	0	0	0	0	0	0	0	0	0	0	FALSE
336	APOA2	0	0	0	0	0	0	0	0	0	0	0	0	0	0	0	0	0	0	FALSE
337	APOA4	0	0	0	0	0	0	0	0	0	0	0	0	0	0	0	0	0	0	FALSE
116519	APOA5	0	0	0	0	0	0	0	0	0	0	0	0	0	0	0	0	0	0	FALSE
338	APOB	0	0	0	0	0	0	0	0	0	0	0	0	0	0	0	0	0	0	FALSE
339	APOBEC1	0	0	0	0	0	0	0	0	0	0	0	0	0	0	0	0	0	0	FALSE
10930	APOBEC2	0	0	0	0	0	0	0	0	0	0	0	0	0	0	0	0	0	0	FALSE
200315	APOBEC3A	0	0	0	0	0	0	0	0	0	0	0	0	0	0	0	0	0	0	FALSE
9582	APOBEC3B	0	0	0	0	0	0	0	0	0	0	0	0	0	0	0	0	0	0	FALSE
27350	APOBEC3C	0	0	0	0	0	0	0	0	0	0	0	0	0	0	0	0	0	0	FALSE
140564	APOBEC3D	0	0	0	0	0	0	0	0	0	0	0	0	0	0	0	0	0	0	FALSE
200316	APOBEC3F	0	0	0	0	0	0	0	0	0	0	0	0	0	0	0	0	0	0	FALSE
60489	APOBEC3G	0	0	0	0	0	0	0	0	0	0	0	0	0	0	0	0	0	0	FALSE
164668	APOBEC3H	0	0	0	0	0	0	0	0	0	0	0	0	0	0	0	0	0	0	FALSE
403314	APOBEC4	0	0	0	0	0	0	0	0	0	0	0	0	0	0	0	0	0	0	FALSE
55911	APOBR	0	0	0	0	0	0	0	0	0	0	0	0	0	0	0	0	0	0	FALSE
341	APOC1	0	0	0	0	0	0	0	0	0	0	0	0	0	0	0	0	0	0	FALSE
344	APOC2	0	0	0	0	0	0	0	0	0	0	0	0	0	0	0	0	0	0	FALSE
345	APOC3	0	0	0	0	0	0	0	0	0	0	0	0	0	0	0	0	0	0	FALSE
346	APOC4	0	0	0	0	0	0	0	0	0	0	0	0	0	0	0	0	0	0	FALSE
347	APOD	0	0	0	0	0	0	0	0	0	0	0	0	0	0	0	0	0	0	FALSE
348	APOE	0	0	0	0	0	0	0	0	0	0	0	0	0	0	0	0	0	0	FALSE
319	APOF	0	0	0	0	0	0	0	0	0	0	0	0	0	0	0	0	0	0	FALSE
350	APOH	0	0	0	0	0	0	0	0	0	0	0	0	0	0	0	0	0	0	FALSE
8542	APOL1	0	0	0	0	0	0	0	0	0	0	0	0	0	0	0	0	0	0	FALSE
23780	APOL2	0	0	0	0	0	0	0	0	0	0	0	0	0	0	0	0	0	0	FALSE
80833	APOL3	0	0	0	0	0	0	0	0	0	0	0	0	0	0	0	0	0	0	FALSE
80831	APOL5	0	0	0	0	0	0	0	0	0	0	0	0	0	0	0	0	0	0	FALSE
80830	APOL6	0	0	0	0	0	0	0	0	0	0	0	0	0	0	0	0	0	0	FALSE
81575	APOLD1	0	0	0	0	0	0	0	0	0	0	0	0	0	0	0	0	0	0	FALSE
55937	APOM	0	0	0	0	0	0	0	0	0	0	0	0	0	0	0	0	0	0	FALSE
79135	APOO	0	0	0	0	0	0	0	0	0	0	0	0	0	0	0	0	0	0	FALSE
139322	APOOL	0	0	0	0	0	0	0	0	0	0	0	0	0	0	0	0	0	0	FALSE
84334	COA8	0	0	0	0	0	0	0	0	0	0	0	0	0	0	0	0	0	0	FALSE
351	APP	0	0	0	0	0	0	0	0	0	0	0	0	0	0	0	0	0	0	FALSE
10513	APPBP2	0	0	0	0	0	0	0	0	0	0	0	0	0	0	0	0	0	0	FALSE
26060	APPL1	0	0	0	0	0	0	0	0	0	0	0	0	0	0	0	0	0	0	FALSE
55198	APPL2	0	0	0	0	0	0	0	0	0	0	0	0	0	0	0	0	0	0	FALSE
353	APRT	0	0	0	0	0	0	0	0	0	0	0	0	0	0	0	0	0	0	FALSE
54840	APTX	0	0	0	0	0	0	0	0	0	0	0	0	0	0	0	0	0	0	FALSE
358	AQP1	0	0	0	0	0	0	0	0	0	0	0	0	0	0	0	0	0	0	FALSE
89872	AQP10	0	0	0	0	0	0	0	0	0	0	0	0	0	0	0	0	0	0	FALSE
282679	AQP11	0	0	0	0	0	0	0	0	0	0	0	0	0	0	0	0	0	0	FALSE
653437	AQP12B	0	0	0	0	0	0	0	0	0	0	0	0	0	0	0	0	0	0	FALSE
359	AQP2	0	0	0	0	0	0	0	0	0	0	0	0	0	0	0	0	0	0	FALSE
360	AQP3	0	0	0	0	0	0	0	0	0	0	0	0	0	0	0	0	0	0	FALSE
361	AQP4	0	0	0	0	0	0	0	0	0	0	0	0	0	0	0	0	0	0	FALSE
362	AQP5	0	0	0	0	0	0	0	0	0	0	0	0	0	0	0	0	0	0	FALSE
363	AQP6	0	0	0	0	0	0	0	0	0	0	0	0	0	0	0	0	0	0	FALSE
364	AQP7	1	1	1	1	1	1	1	0	1	1	1	1	1	1	1	0	1	15	TRUE
343	AQP8	0	0	0	0	0	0	0	0	0	0	0	0	0	0	0	0	0	0	FALSE
366	AQP9	0	0	0	0	0	0	0	0	0	0	0	0	0	0	0	0	0	0	FALSE
9716	AQR	1	1	1	1	1	1	1	1	1	1	1	1	1	1	1	1	1	17	TRUE
367	AR	0	0	0	0	0	0	0	0	0	0	0	0	0	0	0	0	0	0	FALSE
369	ARAF	0	0	0	0	0	0	0	0	0	0	0	0	0	0	0	0	0	0	FALSE
116985	ARAP1	0	0	0	0	0	0	0	0	0	0	0	0	0	0	0	0	0	0	FALSE
116984	ARAP2	0	0	0	0	0	0	0	0	0	0	0	0	0	0	0	0	0	0	FALSE
64411	ARAP3	0	0	0	0	0	0	0	0	0	0	0	0	0	0	0	0	0	0	FALSE
23237	ARC	0	0	0	0	0	0	0	0	0	0	0	0	0	0	0	0	0	0	FALSE
372	ARCN1	1	1	1	1	1	1	1	1	1	1	1	1	1	1	1	1	1	17	TRUE
374	AREG	0	0	0	0	0	0	0	0	0	0	0	0	0	0	0	0	0	0	FALSE
9870	AREL1	0	0	0	0	0	0	0	0	0	0	0	0	0	0	0	0	0	0	FALSE
375	ARF1	0	0	0	0	0	0	0	0	0	0	0	0	0	0	0	0	0	0	FALSE
377	ARF3	0	0	0	0	0	0	0	0	0	0	0	0	0	0	0	0	0	0	FALSE
378	ARF4	0	0	0	0	0	0	0	0	0	0	0	0	0	0	0	0	0	0	FALSE
381	ARF5	0	0	0	0	0	0	0	0	0	0	0	0	0	0	0	0	0	0	FALSE
382	ARF6	0	0	0	0	0	0	0	0	0	0	0	0	0	0	0	0	0	0	FALSE
55738	ARFGAP1	0	0	0	0	0	0	0	0	0	0	0	0	0	0	0	0	0	0	FALSE
84364	ARFGAP2	0	0	0	0	0	0	0	0	0	0	0	0	0	0	0	0	0	0	FALSE
26286	ARFGAP3	0	0	0	0	0	0	0	0	0	0	0	0	0	0	0	0	0	0	FALSE
10565	ARFGEF1	0	0	0	0	0	0	0	0	0	0	0	0	0	0	0	0	0	0	FALSE
57221	ARFGEF3	0	0	0	0	0	0	0	0	0	0	0	0	0	0	0	0	0	0	FALSE
27236	ARFIP1	0	0	0	0	0	0	0	0	0	0	0	0	0	0	0	0	0	0	FALSE
23647	ARFIP2	0	0	0	0	0	0	0	0	0	0	0	0	0	0	0	0	0	0	FALSE
10139	ARFRP1	1	0	1	0	0	0	0	0	0	1	1	0	0	1	0	0	1	6	FALSE
383	ARG1	0	0	0	0	0	0	0	0	0	0	0	0	0	0	0	0	0	0	FALSE
384	ARG2	0	0	0	0	0	0	0	0	0	0	0	0	0	0	0	0	0	0	FALSE
503582	ARGFX	0	0	0	1	0	0	0	0	0	0	0	1	1	0	0	1	0	4	FALSE
55082	ARGLU1	1	1	1	1	1	1	1	1	1	1	1	1	1	1	1	1	1	17	TRUE
392	ARHGAP1	0	0	0	0	0	0	0	0	0	0	0	0	0	0	0	0	0	0	FALSE
79658	ARHGAP10	0	0	0	0	0	0	0	0	0	0	0	0	0	0	0	0	0	0	FALSE
9824	ARHGAP11A	0	0	0	0	0	0	0	0	0	0	0	0	0	0	0	0	0	0	FALSE
89839	ARHGAP11B	0	0	0	0	0	0	0	0	0	0	0	0	0	0	0	0	0	0	FALSE
94134	ARHGAP12	0	0	0	0	0	0	0	0	0	0	0	0	0	0	0	0	0	0	FALSE
55843	ARHGAP15	0	0	0	0	0	0	0	0	0	0	0	0	0	0	0	0	0	0	FALSE
55114	ARHGAP17	0	0	0	0	0	0	0	0	0	0	0	0	0	0	0	0	0	0	FALSE
93663	ARHGAP18	0	0	0	0	0	0	0	0	0	0	0	0	0	0	0	0	0	0	FALSE
84986	ARHGAP19	0	0	0	0	0	0	0	0	0	0	0	0	0	0	0	0	0	0	FALSE
57569	ARHGAP20	0	0	0	0	0	0	0	0	0	0	0	0	0	0	0	0	0	0	FALSE
57584	ARHGAP21	0	0	0	0	0	0	0	0	0	0	0	0	0	0	0	0	0	0	FALSE
58504	ARHGAP22	0	0	0	0	0	0	0	0	0	0	0	0	0	0	0	0	0	0	FALSE
57636	ARHGAP23	0	0	0	0	0	0	0	0	0	0	0	0	0	0	0	0	0	0	FALSE
83478	ARHGAP24	0	0	0	0	0	0	0	0	0	0	0	0	0	0	0	0	0	0	FALSE
9938	ARHGAP25	0	0	0	0	0	0	0	0	0	0	0	0	0	0	0	0	0	0	FALSE
23092	ARHGAP26	0	0	0	0	0	0	0	0	0	0	0	0	0	0	0	0	0	0	FALSE
201176	ARHGAP27	0	0	0	0	0	0	0	0	0	0	0	0	0	0	0	0	0	0	FALSE
79822	ARHGAP28	0	0	0	0	0	0	0	0	0	0	0	0	0	0	0	0	0	0	FALSE
9411	ARHGAP29	0	0	0	0	0	0	0	0	0	0	0	0	0	0	0	0	0	0	FALSE
257106	ARHGAP30	0	0	0	0	0	0	0	0	0	0	0	0	0	0	0	0	0	0	FALSE
57514	ARHGAP31	0	0	0	0	0	0	0	0	0	0	0	0	0	0	0	0	0	0	FALSE
9743	ARHGAP32	0	0	0	0	0	0	0	0	0	0	0	0	0	0	0	0	0	0	FALSE
115703	ARHGAP33	0	0	0	0	0	0	0	0	0	0	0	0	0	0	0	0	0	0	FALSE
2909	ARHGAP35	0	0	0	0	0	0	0	0	0	0	0	0	0	0	0	0	0	0	FALSE
158763	ARHGAP36	0	0	0	0	0	0	0	0	0	0	0	0	0	0	0	0	0	0	FALSE
80728	ARHGAP39	0	0	0	0	0	0	0	0	0	0	0	0	0	0	0	0	0	0	FALSE
393	ARHGAP4	0	0	0	0	0	0	0	0	0	0	0	0	0	0	0	0	0	0	FALSE
9912	ARHGAP44	0	0	0	0	0	0	0	0	0	0	0	0	0	0	0	0	0	0	FALSE
23526	ARHGAP45	0	0	0	0	0	0	0	0	0	0	0	0	0	0	0	0	0	0	FALSE
394	ARHGAP5	0	0	0	0	0	0	0	0	0	0	0	0	0	0	0	0	0	0	FALSE
395	ARHGAP6	0	0	0	0	0	0	0	0	0	0	0	0	0	0	0	0	0	0	FALSE
23779	ARHGAP8	0	0	0	0	0	0	0	0	0	0	0	0	0	0	0	0	0	0	FALSE
64333	ARHGAP9	0	0	0	0	0	0	0	0	0	0	0	0	0	0	0	0	0	0	FALSE
396	ARHGDIA	0	0	0	0	0	0	0	0	0	0	0	0	0	0	0	0	0	0	FALSE
397	ARHGDIB	0	0	0	0	0	0	0	0	0	0	0	0	0	0	0	0	0	0	FALSE
398	ARHGDIG	0	0	0	0	0	0	0	0	0	0	0	0	0	0	0	0	0	0	FALSE
9138	ARHGEF1	0	0	0	0	0	0	0	0	0	0	0	0	0	0	0	0	0	0	FALSE
9639	ARHGEF10	0	0	0	0	0	0	0	0	0	0	0	0	0	0	0	0	0	0	FALSE
55160	ARHGEF10L	0	0	0	0	0	0	0	0	0	0	0	0	0	0	0	0	0	0	FALSE
9826	ARHGEF11	0	0	0	0	0	0	0	0	0	0	0	0	0	0	0	0	0	0	FALSE
23365	ARHGEF12	0	0	0	0	0	0	0	0	0	0	0	0	0	0	0	0	0	0	FALSE
22899	ARHGEF15	0	0	0	0	0	0	0	0	0	0	0	0	0	0	0	0	0	0	FALSE
27237	ARHGEF16	0	0	0	0	0	0	0	0	0	0	0	0	0	0	0	0	0	0	FALSE
23370	ARHGEF18	0	0	0	0	0	0	0	0	0	0	0	0	0	0	0	0	0	0	FALSE
128272	ARHGEF19	0	0	0	0	0	0	0	0	0	0	0	0	0	0	0	0	0	0	FALSE
9181	ARHGEF2	0	0	0	0	0	0	0	0	0	0	0	0	0	0	0	0	0	0	FALSE
115557	ARHGEF25	0	0	0	0	0	0	0	0	0	0	0	0	0	0	0	0	0	0	FALSE
26084	ARHGEF26	0	0	0	0	0	0	0	0	0	0	0	0	0	0	0	0	0	0	FALSE
64283	ARHGEF28	0	0	0	0	0	0	0	0	0	0	0	0	0	0	0	0	0	0	FALSE
50650	ARHGEF3	0	0	0	0	0	0	0	0	0	0	0	0	0	0	0	0	0	0	FALSE
100271715	ARHGEF33	0	0	0	0	0	0	0	0	0	0	0	0	0	0	0	0	0	0	FALSE
445328	ARHGEF35	0	0	0	0	0	0	0	0	0	0	0	0	0	0	0	0	0	0	FALSE
389337	ARHGEF37	0	0	0	0	0	0	0	0	0	0	0	0	0	0	0	0	0	0	FALSE
54848	ARHGEF38	0	0	0	0	0	0	0	0	0	0	0	0	0	0	0	0	0	0	FALSE
84904	ARHGEF39	0	0	0	0	0	0	0	0	0	0	0	0	0	0	0	0	0	0	FALSE
50649	ARHGEF4	0	0	0	0	0	0	0	0	0	0	0	0	0	0	0	0	0	0	FALSE
55701	ARHGEF40	0	0	0	0	0	0	0	0	0	0	0	0	0	0	0	0	0	0	FALSE
7984	ARHGEF5	0	0	0	0	0	0	0	0	0	0	0	0	0	0	0	0	0	0	FALSE
9459	ARHGEF6	0	0	0	0	0	0	0	0	0	0	0	0	0	0	0	0	0	0	FALSE
8874	ARHGEF7	0	0	0	0	0	0	0	0	0	0	0	0	0	0	0	0	0	0	FALSE
23229	ARHGEF9	0	0	0	0	0	0	0	0	0	0	0	0	0	0	0	0	0	0	FALSE
8289	ARID1A	0	0	0	0	0	0	0	0	0	0	0	0	0	0	0	0	0	0	FALSE
57492	ARID1B	0	0	0	0	0	0	0	0	0	0	0	0	0	0	0	0	0	0	FALSE
196528	ARID2	0	0	0	0	0	0	0	0	0	0	0	0	0	0	0	0	0	0	FALSE
1820	ARID3A	0	0	0	0	0	0	0	0	0	0	0	0	0	0	0	0	0	0	FALSE
10620	ARID3B	0	0	0	0	0	0	0	0	0	0	0	0	0	0	0	0	0	0	FALSE
138715	ARID3C	0	0	0	0	0	0	0	0	0	0	0	0	0	0	0	0	0	0	FALSE
5926	ARID4A	0	0	0	0	0	0	0	0	0	0	0	0	0	0	0	0	0	0	FALSE
51742	ARID4B	0	0	0	0	0	0	0	0	0	0	0	0	0	0	0	0	0	0	FALSE
10865	ARID5A	0	0	0	0	0	0	0	0	0	0	0	0	0	0	0	0	0	0	FALSE
84159	ARID5B	0	0	0	0	0	0	0	0	0	0	0	0	0	0	0	0	0	0	FALSE
25820	ARIH1	1	1	1	1	1	1	1	1	1	1	1	1	1	1	1	1	1	17	TRUE
10425	ARIH2	0	0	0	0	0	0	0	0	0	0	0	0	0	0	0	0	0	0	FALSE
400	ARL1	0	0	0	0	0	0	0	0	0	0	0	0	0	0	0	0	0	0	FALSE
285598	ARL10	0	0	0	0	0	0	0	0	0	0	0	0	0	0	0	0	0	0	FALSE
115761	ARL11	0	0	0	0	0	0	0	0	0	0	0	0	0	0	0	0	0	0	FALSE
392509	ARL13A	0	0	0	0	0	0	0	0	0	0	0	0	0	0	0	0	0	0	FALSE
200894	ARL13B	0	0	0	0	0	0	0	0	0	0	0	0	0	0	0	0	0	0	FALSE
80117	ARL14	0	0	0	0	0	0	0	0	0	0	0	0	0	0	0	0	0	0	FALSE
120534	ARL14EP	0	0	0	0	0	0	0	0	0	0	0	0	0	0	0	0	0	0	FALSE
54622	ARL15	0	0	0	0	0	0	0	0	0	0	0	0	0	0	0	0	0	0	FALSE
339231	ARL16	0	0	0	0	0	0	0	0	0	0	0	0	0	0	0	0	0	0	FALSE
51326	ARL17A	0	0	0	0	0	0	0	0	0	0	0	0	0	0	0	0	0	0	FALSE
402	ARL2	1	1	1	1	1	1	1	1	1	1	1	1	1	1	1	1	1	17	TRUE
23568	ARL2BP	0	0	0	0	0	0	0	0	0	0	0	0	0	0	0	0	0	0	FALSE
403	ARL3	0	0	0	0	0	0	0	0	0	0	0	0	0	0	0	0	0	0	FALSE
10124	ARL4A	0	0	0	0	0	0	0	0	0	0	0	0	0	0	0	0	0	0	FALSE
10123	ARL4C	0	0	0	0	0	0	0	0	0	0	0	0	0	0	0	0	0	0	FALSE
379	ARL4D	0	0	0	0	0	0	0	0	0	0	0	0	0	0	0	0	0	0	FALSE
26225	ARL5A	0	0	0	0	0	0	0	0	0	0	0	0	0	0	0	0	0	0	FALSE
221079	ARL5B	0	0	0	0	0	0	0	0	0	0	0	0	0	0	0	0	0	0	FALSE
390790	ARL5C	0	0	0	0	0	0	0	0	0	0	0	0	0	0	0	0	0	0	FALSE
84100	ARL6	0	0	0	0	0	0	0	0	0	0	0	0	0	0	0	0	0	0	FALSE
23204	ARL6IP1	0	0	0	0	0	0	0	0	0	0	0	0	0	0	0	0	0	0	FALSE
51329	ARL6IP4	0	0	0	0	0	0	0	0	0	0	0	0	0	0	0	0	0	0	FALSE
10550	ARL6IP5	0	0	0	0	0	0	0	0	0	0	0	0	0	0	0	0	0	0	FALSE
127829	ARL8A	0	0	0	0	0	0	0	0	0	0	0	0	0	0	0	0	0	0	FALSE
55207	ARL8B	0	0	0	0	0	0	0	0	0	0	0	0	0	0	0	0	0	0	FALSE
132946	ARL9	0	0	0	0	0	0	0	0	0	0	0	0	0	0	0	0	0	0	FALSE
55156	ARMC1	0	0	0	0	0	0	0	0	0	0	0	0	0	0	0	0	0	0	FALSE
83787	ARMC10	0	0	0	0	0	0	0	0	0	0	0	0	0	0	0	0	0	0	FALSE
84071	ARMC2	0	0	0	0	0	0	0	0	0	0	0	0	0	0	0	0	0	0	FALSE
219681	ARMC3	0	0	0	0	0	0	0	0	0	0	0	0	0	0	0	0	0	0	FALSE
55130	ARMC4	0	0	0	0	0	0	0	0	0	0	0	0	0	0	0	0	0	0	FALSE
79798	ARMC5	0	0	0	0	0	0	0	0	0	0	0	0	0	0	0	0	0	0	FALSE
93436	ARMC6	0	0	0	0	0	0	0	0	0	0	0	0	0	0	0	0	0	0	FALSE
79637	ARMC7	1	1	1	1	1	1	1	1	1	1	1	1	1	1	1	1	1	17	TRUE
25852	ARMC8	0	0	0	0	0	0	0	0	0	0	0	0	0	0	0	0	0	0	FALSE
51309	ARMCX1	0	0	0	0	0	0	0	0	0	0	0	0	0	0	0	0	0	0	FALSE
9823	ARMCX2	0	0	0	0	0	0	0	0	0	0	0	0	0	0	0	0	0	0	FALSE
51566	ARMCX3	0	0	0	0	0	0	0	0	0	0	0	0	0	0	0	0	0	0	FALSE
64860	ARMCX5	0	0	0	0	0	0	0	0	0	0	0	0	0	0	0	0	0	0	FALSE
54470	ARMCX6	0	0	0	0	0	0	0	0	0	0	0	0	0	0	0	0	0	0	FALSE
339541	ARMH1	0	0	0	0	0	0	0	0	0	0	0	0	0	0	0	0	0	0	FALSE
79591	ARMH3	0	0	0	0	0	0	0	0	0	0	0	0	0	0	0	0	0	0	FALSE
145407	ARMH4	0	0	0	0	0	0	0	0	0	0	0	0	0	0	0	0	0	0	FALSE
405	ARNT	0	0	0	0	0	0	0	0	0	0	0	0	0	0	0	0	0	0	FALSE
9915	ARNT2	0	0	0	0	0	0	0	0	0	0	0	0	0	0	0	0	0	0	FALSE
406	ARNTL	0	0	0	0	0	0	0	0	0	0	0	0	0	0	0	0	0	0	FALSE
56938	ARNTL2	0	0	0	0	0	0	0	0	0	0	0	0	0	0	0	0	0	0	FALSE
10552	ARPC1A	0	0	0	0	0	0	0	0	0	0	0	0	0	0	0	0	0	0	FALSE
10095	ARPC1B	0	0	0	0	0	0	0	0	0	0	0	0	0	0	0	0	0	0	FALSE
10109	ARPC2	0	0	0	0	0	0	0	0	0	0	0	0	0	0	0	0	0	0	FALSE
10094	ARPC3	0	0	0	0	0	0	0	0	0	0	0	0	0	0	1	0	0	1	FALSE
10093	ARPC4	0	0	1	0	1	0	1	0	1	1	0	1	1	0	1	0	1	9	FALSE
10092	ARPC5	0	0	0	0	0	0	0	0	0	0	0	0	0	0	0	0	0	0	FALSE
81873	ARPC5L	0	0	0	0	0	0	0	0	0	0	0	0	0	0	0	0	0	0	FALSE
348110	ARPIN	0	0	0	0	0	0	0	0	0	0	0	0	0	0	0	0	0	0	FALSE
10776	ARPP19	0	0	0	0	0	0	0	0	0	0	0	0	0	0	0	0	0	0	FALSE
10777	ARPP21	0	0	0	0	0	0	0	0	0	0	0	0	0	0	0	0	0	0	FALSE
407	ARR3	0	0	0	0	0	0	0	0	0	0	0	0	0	0	0	0	0	0	FALSE
408	ARRB1	0	0	0	0	0	0	0	0	0	0	0	0	0	0	0	0	0	0	FALSE
409	ARRB2	0	0	0	0	0	0	0	0	0	0	0	0	0	0	0	0	0	0	FALSE
92714	ARRDC1	0	0	0	0	0	0	0	0	0	0	0	0	0	0	0	0	0	0	FALSE
27106	ARRDC2	0	0	0	0	0	0	0	0	0	0	0	0	0	0	0	0	0	0	FALSE
91947	ARRDC4	0	0	0	0	0	0	0	0	0	0	0	0	0	0	0	0	0	0	FALSE
410	ARSA	0	0	0	0	0	0	0	0	0	0	0	0	0	0	0	0	0	0	FALSE
411	ARSB	0	0	0	0	0	0	0	0	0	0	0	0	0	0	0	0	0	0	FALSE
414	ARSD	0	0	0	0	0	0	0	0	0	0	0	0	0	0	0	0	0	0	FALSE
415	ARSE	0	0	0	0	0	0	0	0	0	0	0	0	0	0	0	0	0	0	FALSE
416	ARSF	0	0	0	0	0	0	0	0	0	0	0	0	0	0	0	0	0	0	FALSE
22901	ARSG	0	0	0	0	0	0	0	0	0	0	0	0	0	0	0	0	0	0	FALSE
347527	ARSH	0	0	0	0	0	0	0	0	0	0	0	0	0	0	0	0	0	0	FALSE
340075	ARSI	0	0	0	0	0	0	0	0	0	0	0	0	0	0	0	0	0	0	FALSE
79642	ARSJ	0	0	0	0	0	0	0	0	0	0	0	0	0	0	0	0	0	0	FALSE
153642	ARSK	0	0	0	0	0	0	0	0	0	0	0	0	0	0	0	0	0	0	FALSE
417	ART1	0	0	0	0	0	0	0	0	0	0	0	0	0	0	0	0	0	0	FALSE
419	ART3	0	0	0	0	0	0	0	0	0	0	0	0	0	0	0	0	0	0	FALSE
420	ART4	0	0	0	0	0	0	0	0	0	0	0	0	0	0	0	0	0	0	FALSE
116969	ART5	0	0	0	0	0	0	0	0	0	0	0	0	0	0	0	0	0	0	FALSE
64801	ARV1	0	0	0	0	0	0	0	0	0	0	0	0	0	0	0	0	0	0	FALSE
421	ARVCF	0	0	0	0	0	0	0	0	0	0	0	0	0	0	0	0	0	0	FALSE
170302	ARX	0	0	0	0	0	0	0	0	0	0	0	0	0	0	0	0	0	0	FALSE
57412	AS3MT	0	0	0	0	0	0	0	0	0	0	0	0	0	0	0	0	0	0	FALSE
56624	ASAH2	0	0	0	0	0	0	0	0	0	0	0	0	0	0	0	0	0	0	FALSE
50807	ASAP1	0	0	0	0	0	0	0	0	0	0	0	0	0	0	0	0	0	0	FALSE
8853	ASAP2	0	0	0	0	0	0	0	0	0	0	0	0	0	0	0	0	0	0	FALSE
55616	ASAP3	0	0	0	0	0	0	0	0	0	0	0	0	0	0	0	0	0	0	FALSE
51665	ASB1	0	0	0	0	0	0	0	0	0	0	0	0	0	0	0	0	0	0	FALSE
136371	ASB10	0	0	0	0	0	0	0	0	0	0	0	0	0	0	0	0	0	0	FALSE
140456	ASB11	0	0	0	0	0	0	0	0	0	0	0	0	0	0	0	0	0	0	FALSE
142689	ASB12	0	0	0	0	0	0	0	0	0	0	0	0	0	0	0	0	0	0	FALSE
79754	ASB13	0	0	0	0	0	0	0	0	0	0	0	0	0	0	0	0	0	0	FALSE
142686	ASB14	0	0	0	0	0	0	0	0	0	0	0	0	0	0	0	0	0	0	FALSE
142685	ASB15	0	0	0	0	0	0	0	0	0	0	0	0	0	0	0	0	0	0	FALSE
92591	ASB16	0	0	0	0	0	0	0	0	0	0	0	0	0	0	0	0	0	0	FALSE
127247	ASB17	0	0	0	0	0	0	0	0	0	0	0	0	0	0	0	0	0	0	FALSE
401036	ASB18	0	0	0	0	0	0	0	0	0	0	0	0	0	0	0	0	0	0	FALSE
51130	ASB3	0	0	0	0	0	0	0	0	0	0	0	0	0	0	0	0	0	0	FALSE
51666	ASB4	0	0	0	0	0	0	0	0	0	0	0	0	0	0	0	0	0	0	FALSE
140458	ASB5	0	0	0	0	0	0	0	0	0	0	0	0	0	0	0	0	0	0	FALSE
140459	ASB6	0	0	0	0	0	0	0	0	0	0	0	0	0	0	0	0	0	0	FALSE
140460	ASB7	0	0	0	0	0	0	0	0	0	0	0	0	0	0	0	0	0	0	FALSE
140461	ASB8	0	0	0	0	0	0	0	0	0	0	0	0	0	0	0	0	0	0	FALSE
140462	ASB9	0	0	0	0	0	0	0	0	0	0	0	0	0	0	0	0	0	0	FALSE
51008	ASCC1	0	0	0	0	0	0	0	0	0	0	0	0	0	0	0	0	0	0	FALSE
84164	ASCC2	0	0	0	0	0	0	0	0	0	0	0	0	0	0	0	0	0	0	FALSE
10973	ASCC3	0	0	0	0	0	0	0	0	0	0	0	0	0	0	0	0	0	0	FALSE
429	ASCL1	0	0	0	0	0	0	0	0	0	0	0	0	0	0	0	0	0	0	FALSE
430	ASCL2	0	0	0	0	0	0	0	0	0	0	0	0	0	0	0	0	0	0	FALSE
56676	ASCL3	0	0	0	0	0	0	0	0	0	0	0	0	0	0	0	0	0	0	FALSE
121549	ASCL4	0	0	0	0	0	0	0	0	0	0	0	0	0	0	0	0	0	0	FALSE
25842	ASF1A	0	0	0	0	0	0	0	0	0	0	0	0	0	0	0	0	0	0	FALSE
55723	ASF1B	0	0	0	0	0	0	0	0	0	0	0	0	0	0	0	0	0	0	FALSE
432	ASGR1	0	0	0	0	0	0	0	0	0	0	0	0	0	0	0	0	0	0	FALSE
433	ASGR2	0	0	0	0	0	0	0	0	0	0	0	0	0	0	0	0	0	0	FALSE
55870	ASH1L	0	0	0	0	0	0	0	0	0	0	0	0	0	0	0	0	0	0	FALSE
9070	ASH2L	0	0	0	0	0	1	0	0	1	1	0	0	0	0	0	0	0	3	FALSE
41	ASIC1	0	0	0	0	0	0	0	0	0	0	0	0	0	0	0	0	0	0	FALSE
40	ASIC2	0	0	0	0	0	0	0	0	0	0	0	0	0	0	0	0	0	0	FALSE
51802	ASIC5	0	0	0	0	0	0	0	0	0	0	0	0	0	0	0	0	0	0	FALSE
434	ASIP	0	0	0	0	0	0	0	0	0	0	0	0	0	0	0	0	0	0	FALSE
435	ASL	0	0	0	0	0	0	0	0	0	0	0	0	0	0	0	0	0	0	FALSE
438	ASMT	0	0	0	0	0	0	0	0	0	0	0	0	0	0	0	0	0	0	FALSE
8623	ASMTL	0	0	0	0	0	0	0	0	0	0	0	0	0	0	0	0	0	0	FALSE
439	ASNA1	0	0	1	1	1	0	1	1	1	1	1	0	0	0	1	1	0	10	FALSE
440	ASNS	0	0	0	0	0	0	0	0	0	0	0	0	0	0	0	0	0	0	FALSE
54529	ASNSD1	0	0	0	0	0	0	0	0	0	0	0	0	0	0	0	0	0	0	FALSE
443	ASPA	0	0	0	0	0	0	0	0	0	0	0	0	0	0	0	0	0	0	FALSE
444	ASPH	0	0	0	0	0	0	0	0	0	0	0	0	0	0	0	0	0	0	FALSE
253982	ASPHD1	0	0	0	0	0	0	0	0	0	0	0	0	0	0	0	0	0	0	FALSE
57168	ASPHD2	0	0	0	0	0	0	0	0	0	0	0	0	0	0	0	0	0	0	FALSE
259266	ASPM	0	0	0	0	0	0	0	0	0	0	0	0	0	0	0	0	0	0	FALSE
151516	ASPRV1	0	0	0	0	0	0	0	0	0	0	0	0	0	0	0	0	0	0	FALSE
80150	ASRGL1	0	0	0	0	0	0	0	0	0	0	0	0	0	0	0	0	0	0	FALSE
445	ASS1	0	0	0	0	0	0	0	0	0	0	0	0	0	0	0	0	0	0	FALSE
28990	ASTE1	0	0	0	0	0	0	0	0	0	0	0	0	0	0	0	0	0	0	FALSE
431705	ASTL	0	0	0	0	0	0	0	0	0	0	0	0	0	0	0	0	0	0	FALSE
460	ASTN1	0	0	0	0	0	0	0	0	0	0	0	0	0	0	0	0	0	0	FALSE
23245	ASTN2	0	0	0	0	0	0	0	0	0	0	0	0	0	0	0	0	0	0	FALSE
171023	ASXL1	0	0	0	0	0	0	0	0	0	0	0	0	0	0	0	0	0	0	FALSE
80816	ASXL3	0	0	0	0	0	0	0	0	0	0	0	0	0	0	0	0	0	0	FALSE
136991	ASZ1	0	0	0	0	0	0	0	0	0	0	0	0	0	0	0	0	0	0	FALSE
84896	ATAD1	0	0	0	0	0	0	0	0	0	0	0	0	0	0	0	0	0	0	FALSE
29028	ATAD2	0	0	0	0	0	0	0	0	0	0	0	0	0	0	0	0	0	0	FALSE
54454	ATAD2B	0	0	0	0	0	0	0	0	0	0	0	0	0	0	0	0	0	0	FALSE
55210	ATAD3A	0	0	0	0	0	0	0	0	0	0	0	0	0	0	0	0	0	0	FALSE
83858	ATAD3B	0	0	0	0	0	0	0	0	0	0	0	0	0	0	0	0	0	0	FALSE
219293	ATAD3C	0	0	0	0	0	0	0	0	0	0	0	0	0	0	0	0	0	0	FALSE
79915	ATAD5	0	0	0	0	0	0	0	0	0	0	0	0	0	0	0	0	0	0	FALSE
79969	ATAT1	0	0	0	0	0	0	0	0	0	0	0	0	0	0	0	0	0	0	FALSE
85300	ATCAY	0	0	0	0	0	0	0	0	0	0	0	0	0	0	0	0	0	0	FALSE
466	ATF1	0	0	0	0	0	0	0	0	0	0	0	0	0	0	0	0	0	0	FALSE
1386	ATF2	0	0	0	0	0	0	0	0	0	0	0	0	0	0	0	0	0	0	FALSE
467	ATF3	0	0	0	0	0	0	0	0	0	0	0	0	0	0	0	0	0	0	FALSE
468	ATF4	0	1	1	1	0	1	0	1	0	1	1	1	1	0	1	0	1	11	FALSE
22926	ATF6	0	0	0	0	0	0	0	0	0	0	0	0	0	0	0	0	0	0	FALSE
1388	ATF6B	0	0	0	0	0	0	0	0	0	0	0	0	0	0	0	0	0	0	FALSE
11016	ATF7	0	0	0	0	0	0	0	0	0	0	0	0	0	0	0	0	0	0	FALSE
55729	ATF7IP	0	0	0	0	0	0	0	0	0	0	0	0	0	0	0	0	0	0	FALSE
80063	ATF7IP2	0	0	0	0	0	0	0	0	0	0	0	0	0	0	0	0	0	0	FALSE
83734	ATG10	0	0	0	0	0	0	0	0	0	0	0	0	0	0	0	0	0	0	FALSE
60673	ATG101	0	0	0	0	0	0	0	0	0	0	0	0	0	0	0	0	0	0	FALSE
9140	ATG12	0	0	0	0	0	0	0	0	0	0	0	0	0	0	0	0	0	0	FALSE
9776	ATG13	0	0	0	0	0	0	0	0	0	0	0	0	0	0	0	0	0	0	FALSE
22863	ATG14	0	0	0	0	0	0	0	0	0	0	0	0	0	0	0	0	0	0	FALSE
55054	ATG16L1	0	0	0	0	0	0	0	0	0	0	0	0	0	0	0	0	0	0	FALSE
89849	ATG16L2	0	0	0	0	0	0	0	0	0	0	0	0	0	0	0	0	0	0	FALSE
23130	ATG2A	0	0	0	0	0	0	0	0	0	0	0	0	0	0	0	0	0	0	FALSE
55102	ATG2B	0	0	0	0	0	0	0	0	0	0	0	0	0	0	0	0	0	0	FALSE
64422	ATG3	0	0	0	0	0	0	0	0	0	0	0	0	0	0	0	0	0	0	FALSE
115201	ATG4A	0	0	0	0	0	0	0	0	0	0	0	0	0	0	0	0	0	0	FALSE
23192	ATG4B	0	0	0	0	0	0	0	0	0	0	0	0	0	0	0	0	0	0	FALSE
84938	ATG4C	0	0	0	0	0	0	0	0	0	0	0	0	0	0	0	0	0	0	FALSE
84971	ATG4D	0	0	0	0	0	0	0	0	0	0	0	0	0	0	0	0	0	0	FALSE
9474	ATG5	0	0	0	0	0	0	0	0	0	0	0	0	0	0	0	0	0	0	FALSE
10533	ATG7	0	0	0	0	0	0	0	0	0	0	0	0	0	0	0	0	0	0	FALSE
79065	ATG9A	0	0	0	0	0	0	0	0	0	0	0	0	0	0	0	0	0	0	FALSE
471	ATIC	0	0	0	0	0	0	0	0	0	0	0	0	0	0	0	0	0	0	FALSE
51062	ATL1	0	0	0	0	0	0	0	0	0	0	0	0	0	0	0	0	0	0	FALSE
64225	ATL2	0	0	1	1	0	0	0	0	0	1	0	0	0	1	0	0	0	4	FALSE
25923	ATL3	0	0	0	0	0	0	0	0	0	0	0	0	0	0	0	0	0	0	FALSE
472	ATM	0	0	0	0	0	0	0	0	0	0	0	0	0	0	0	0	0	0	FALSE
23300	ATMIN	0	0	0	0	0	0	0	0	0	0	0	0	0	0	0	0	0	0	FALSE
1822	ATN1	0	0	0	0	0	0	0	0	0	0	0	0	0	0	0	0	0	0	FALSE
474	ATOH1	0	0	0	0	0	0	0	0	0	0	0	0	0	0	0	0	0	0	FALSE
220202	ATOH7	0	0	0	0	0	0	0	0	0	0	0	0	0	0	0	0	0	0	FALSE
84913	ATOH8	0	0	0	0	0	0	0	0	0	0	0	0	0	0	0	0	0	0	FALSE
475	ATOX1	0	0	0	0	0	0	0	0	0	0	0	0	0	0	0	0	0	0	FALSE
57194	ATP10A	0	0	0	0	0	0	0	0	0	0	0	0	0	0	0	0	0	0	FALSE
23120	ATP10B	0	0	0	0	0	0	0	0	0	0	0	0	0	0	0	0	0	0	FALSE
57205	ATP10D	0	0	0	0	0	0	0	0	0	0	0	0	0	0	0	0	0	0	FALSE
23250	ATP11A	0	0	0	0	0	0	0	0	0	0	0	0	0	0	0	0	0	0	FALSE
23200	ATP11B	0	0	0	0	0	0	0	0	0	0	0	0	0	0	0	0	0	0	FALSE
286410	ATP11C	0	0	0	0	0	0	0	0	0	0	0	0	0	0	0	0	0	0	FALSE
479	ATP12A	0	0	0	0	0	0	0	0	0	0	0	0	0	0	0	0	0	0	FALSE
57130	ATP13A1	0	0	0	0	0	0	0	0	0	0	0	0	0	0	0	0	0	0	FALSE
23400	ATP13A2	0	0	0	0	0	0	0	0	0	0	0	0	0	0	0	0	0	0	FALSE
79572	ATP13A3	0	0	0	0	0	0	0	0	0	0	0	0	0	0	0	0	0	0	FALSE
84239	ATP13A4	0	0	0	0	0	0	0	0	0	0	0	0	0	0	0	0	0	0	FALSE
344905	ATP13A5	0	0	0	0	0	0	0	0	0	0	0	0	0	0	0	0	0	0	FALSE
476	ATP1A1	1	1	1	1	1	1	1	1	1	1	1	1	1	1	1	1	1	17	TRUE
477	ATP1A2	0	0	0	0	0	0	0	0	0	0	0	0	0	0	0	0	0	0	FALSE
478	ATP1A3	0	0	0	0	0	0	0	0	0	0	0	0	0	0	0	0	0	0	FALSE
480	ATP1A4	0	0	0	0	0	0	0	0	0	0	0	0	0	0	0	0	0	0	FALSE
481	ATP1B1	0	0	0	0	0	0	0	0	0	0	0	0	0	0	0	0	0	0	FALSE
482	ATP1B2	0	0	0	0	0	0	0	0	0	0	0	0	0	0	0	0	0	0	FALSE
483	ATP1B3	0	0	0	0	0	0	0	1	0	0	1	0	0	0	0	0	0	2	FALSE
23439	ATP1B4	0	0	0	0	0	0	0	0	0	0	0	0	0	0	0	0	0	0	FALSE
91419	ATP23	0	0	0	0	0	0	0	0	0	0	0	0	0	0	0	0	0	0	FALSE
488	ATP2A2	1	1	1	1	1	1	1	1	1	1	1	1	1	1	1	1	1	17	TRUE
489	ATP2A3	0	0	0	0	0	0	0	0	0	0	0	0	0	0	0	0	0	0	FALSE
490	ATP2B1	0	0	0	0	0	0	0	0	0	0	0	0	0	0	0	0	0	0	FALSE
491	ATP2B2	0	0	0	0	0	0	0	0	0	0	0	0	0	0	0	0	0	0	FALSE
492	ATP2B3	0	0	0	0	0	0	0	0	0	0	0	0	0	0	0	0	0	0	FALSE
493	ATP2B4	0	0	0	0	0	0	0	0	0	0	0	0	0	0	0	0	0	0	FALSE
27032	ATP2C1	0	0	0	0	0	0	0	0	0	0	0	0	0	0	0	0	0	0	FALSE
9914	ATP2C2	0	0	0	0	0	0	0	0	0	0	0	0	0	0	0	0	0	0	FALSE
495	ATP4A	0	0	0	0	0	0	0	0	0	0	0	0	0	0	0	0	0	0	FALSE
496	ATP4B	0	0	0	0	0	0	0	0	0	0	0	0	0	0	0	0	0	0	FALSE
498	ATP5F1A	0	0	0	0	0	1	0	0	0	1	0	0	0	0	0	0	0	2	FALSE
506	ATP5F1B	1	1	1	1	1	1	0	1	1	1	1	1	1	1	1	1	1	16	TRUE
509	ATP5F1C	1	0	1	0	1	1	0	0	1	1	1	1	0	1	0	1	0	10	FALSE
513	ATP5F1D	1	1	1	1	1	1	1	0	1	1	0	1	0	1	1	1	1	14	FALSE
514	ATP5F1E	0	0	0	0	1	0	0	0	1	1	1	0	0	0	0	1	0	5	FALSE
93974	ATP5IF1	0	0	0	0	0	0	0	0	0	0	0	0	0	0	0	0	0	0	FALSE
516	ATP5MC1	0	0	0	0	0	0	0	0	0	0	0	0	0	0	0	0	0	0	FALSE
517	ATP5MC2	0	0	0	0	0	0	0	0	0	0	0	0	0	0	0	0	0	0	FALSE
518	ATP5MC3	0	0	0	0	0	0	0	0	0	0	0	0	0	0	0	0	0	0	FALSE
84833	ATP5MD	0	0	0	0	0	0	0	0	0	0	0	0	0	0	0	0	0	0	FALSE
521	ATP5ME	1	1	0	0	1	1	0	0	0	1	1	1	0	0	0	1	0	8	FALSE
9551	ATP5MF	1	1	1	1	0	1	0	1	0	1	0	1	0	0	0	1	1	10	FALSE
10632	ATP5MG	0	0	0	0	0	0	0	0	0	0	0	0	0	0	0	0	0	0	FALSE
9556	ATP5MPL	0	0	0	0	0	0	0	0	0	0	0	0	0	0	0	0	0	0	FALSE
515	ATP5PB	0	0	0	0	0	0	0	0	0	0	0	0	0	0	0	0	0	0	FALSE
10476	ATP5PD	0	0	0	0	0	0	0	0	0	0	0	0	0	0	0	0	0	0	FALSE
522	ATP5PF	0	0	0	0	0	0	0	0	0	0	0	0	0	0	0	0	0	0	FALSE
539	ATP5PO	0	0	0	0	0	0	0	0	0	1	0	0	0	0	0	0	0	1	FALSE
27109	DMAC2L	0	0	0	0	0	0	0	0	0	0	0	0	0	0	0	0	0	0	FALSE
537	ATP6AP1	1	1	1	1	1	1	1	1	1	1	1	1	1	1	1	1	1	17	TRUE
92270	ATP6AP1L	0	0	0	0	0	0	0	0	0	0	0	0	0	0	0	0	0	0	FALSE
10159	ATP6AP2	1	1	1	1	0	1	0	1	1	1	1	1	1	1	1	1	1	15	TRUE
535	ATP6V0A1	0	0	0	0	0	0	0	0	0	0	0	0	0	0	0	0	0	0	FALSE
23545	ATP6V0A2	0	0	0	0	0	0	0	0	0	0	0	0	0	0	0	0	0	0	FALSE
50617	ATP6V0A4	0	0	0	0	0	0	0	0	0	0	0	0	0	0	0	0	0	0	FALSE
533	ATP6V0B	1	1	1	1	1	1	1	1	1	1	1	1	1	1	1	1	1	17	TRUE
527	ATP6V0C	1	1	1	1	1	1	1	1	1	1	1	1	1	1	1	1	1	17	TRUE
9114	ATP6V0D1	0	0	1	0	1	1	0	1	0	1	1	0	0	0	0	0	0	6	FALSE
245972	ATP6V0D2	0	0	0	0	0	0	0	0	0	0	0	0	0	0	0	0	0	0	FALSE
8992	ATP6V0E1	0	0	0	0	0	0	0	0	0	0	0	0	0	0	0	0	0	0	FALSE
155066	ATP6V0E2	0	0	0	0	0	0	0	0	0	0	0	0	0	0	0	0	0	0	FALSE
523	ATP6V1A	1	1	1	1	1	1	1	1	1	1	1	1	1	1	1	1	1	17	TRUE
525	ATP6V1B1	0	0	0	0	0	0	0	0	0	0	0	0	0	0	0	0	0	0	FALSE
526	ATP6V1B2	1	1	1	1	1	1	1	1	1	1	1	1	1	1	1	1	1	17	TRUE
528	ATP6V1C1	0	0	1	0	0	0	1	0	0	1	0	1	1	1	1	0	0	7	FALSE
245973	ATP6V1C2	0	0	0	0	0	0	0	0	0	0	0	0	0	0	0	0	0	0	FALSE
51382	ATP6V1D	0	1	1	1	0	0	1	1	0	1	1	1	1	1	1	0	0	11	FALSE
9296	ATP6V1F	1	1	1	1	1	1	1	1	1	1	1	1	1	1	1	1	1	17	TRUE
534	ATP6V1G2	0	0	0	0	0	0	0	0	0	0	0	0	0	0	0	0	0	0	FALSE
127124	ATP6V1G3	0	0	0	0	0	0	0	0	0	0	0	0	0	0	0	0	0	0	FALSE
51606	ATP6V1H	0	0	0	0	0	0	0	0	1	1	0	0	0	0	0	0	0	2	FALSE
538	ATP7A	0	0	0	0	0	0	0	0	0	0	0	0	0	0	0	0	0	0	FALSE
540	ATP7B	0	0	0	0	0	0	0	0	0	0	0	0	0	0	0	0	0	0	FALSE
10396	ATP8A1	0	0	0	0	0	0	0	0	0	0	0	0	0	0	0	0	0	0	FALSE
51761	ATP8A2	0	0	0	0	0	0	0	0	0	0	0	0	0	0	0	0	0	0	FALSE
5205	ATP8B1	0	0	0	0	0	0	0	0	0	0	0	0	0	0	0	0	0	0	FALSE
57198	ATP8B2	0	0	0	0	0	0	0	0	0	0	0	0	0	0	0	0	0	0	FALSE
148229	ATP8B3	0	0	0	0	0	0	0	0	0	0	0	0	0	0	0	0	0	0	FALSE
79895	ATP8B4	0	0	0	0	0	0	0	0	0	0	0	0	0	0	0	0	0	0	FALSE
10079	ATP9A	0	0	0	0	0	0	0	0	0	0	0	0	0	0	0	0	0	0	FALSE
374868	ATP9B	0	0	0	0	0	0	0	0	0	0	0	0	0	0	0	0	0	0	FALSE
64756	ATPAF1	0	0	0	0	0	0	0	0	0	0	0	0	0	0	0	0	0	0	FALSE
91647	ATPAF2	0	0	0	0	0	0	0	0	0	0	0	0	0	0	0	0	0	0	FALSE
545	ATR	1	1	1	1	1	1	1	1	1	1	1	1	1	1	1	1	1	17	TRUE
51374	ATRAID	0	0	0	0	0	0	0	0	0	0	0	0	0	0	0	0	0	0	FALSE
84126	ATRIP	1	0	1	0	0	0	1	0	1	1	0	1	1	1	1	1	1	11	FALSE
8455	ATRN	0	0	0	0	0	0	0	0	0	0	0	0	0	0	0	0	0	0	FALSE
26033	ATRNL1	0	0	0	0	0	0	0	0	0	0	0	0	0	0	0	0	0	0	FALSE
546	ATRX	0	0	0	0	0	0	0	0	0	0	0	0	0	0	0	0	0	0	FALSE
6310	ATXN1	0	0	0	0	0	0	0	0	0	0	0	0	0	0	0	0	0	0	FALSE
25814	ATXN10	0	0	0	0	0	0	0	0	0	0	0	0	0	0	0	0	0	0	FALSE
6311	ATXN2	0	0	0	0	0	0	0	0	0	0	0	0	0	0	0	0	0	0	FALSE
11273	ATXN2L	0	0	0	0	0	0	0	0	0	0	0	0	0	0	0	0	0	0	FALSE
4287	ATXN3	0	0	0	0	0	0	0	0	0	0	0	0	0	0	0	0	0	0	FALSE
6314	ATXN7	0	0	0	0	0	0	0	0	0	0	0	0	0	0	0	0	0	0	FALSE
222255	ATXN7L1	0	0	0	0	0	0	0	0	0	0	0	0	0	0	0	0	0	0	FALSE
127002	ATXN7L2	0	0	0	0	0	0	0	0	0	0	0	0	0	0	0	0	0	0	FALSE
549	AUH	0	0	0	0	0	0	0	0	0	0	0	0	0	0	0	0	0	0	FALSE
550	AUP1	0	0	0	0	0	0	0	0	0	0	0	0	0	0	0	0	0	0	FALSE
6790	AURKA	1	1	1	1	1	1	1	1	1	1	1	1	1	1	1	1	1	17	TRUE
54998	AURKAIP1	0	0	0	0	0	0	0	0	0	1	0	0	0	0	0	0	0	1	FALSE
9212	AURKB	1	1	1	1	1	1	1	1	1	1	1	1	1	1	1	1	1	17	TRUE
6795	AURKC	0	0	0	0	0	0	0	0	0	0	0	0	0	0	0	0	0	0	FALSE
26053	AUTS2	0	0	0	0	0	0	0	0	0	0	0	0	0	0	0	0	0	0	FALSE
57099	AVEN	0	0	0	0	0	0	0	0	0	0	0	0	0	0	0	0	0	0	FALSE
10677	AVIL	0	0	0	0	0	0	0	0	0	0	0	0	0	0	0	0	0	0	FALSE
23080	AVL9	0	0	0	0	0	0	0	0	0	0	0	0	0	0	0	0	0	0	FALSE
551	AVP	0	0	0	0	0	0	0	0	0	0	0	0	0	0	0	0	0	0	FALSE
60370	AVPI1	0	0	0	0	0	0	0	0	0	0	0	0	0	0	0	0	0	0	FALSE
552	AVPR1A	0	0	0	0	0	0	0	0	0	0	0	0	0	0	0	0	0	0	FALSE
553	AVPR1B	0	0	0	0	0	0	0	0	0	0	0	0	0	0	0	0	0	0	FALSE
554	AVPR2	0	0	0	0	0	0	0	0	0	0	0	0	0	0	0	0	0	0	FALSE
158833	AWAT1	0	0	0	0	0	0	0	0	0	0	0	0	0	0	0	0	0	0	FALSE
158835	AWAT2	0	0	0	0	0	0	0	0	0	0	0	0	0	0	0	0	0	0	FALSE
126859	AXDND1	0	0	0	0	0	0	0	0	0	0	0	0	0	0	0	0	0	0	FALSE
8312	AXIN1	0	0	0	0	0	0	0	0	0	0	0	0	0	0	0	0	0	0	FALSE
8313	AXIN2	0	0	0	0	0	0	0	0	0	0	0	0	0	0	0	0	0	0	FALSE
558	AXL	0	0	0	0	0	0	0	0	0	0	0	0	0	0	0	0	0	0	FALSE
563	AZGP1	0	0	0	0	0	0	0	0	0	0	0	0	0	0	0	0	0	0	FALSE
64343	AZI2	0	0	0	0	0	0	0	0	0	0	0	0	0	0	0	0	0	0	FALSE
51582	AZIN1	0	0	0	0	0	0	0	0	0	0	0	0	0	0	0	0	0	0	FALSE
113451	AZIN2	0	0	0	0	0	0	0	0	0	0	0	0	0	0	0	0	0	0	FALSE
566	AZU1	0	0	0	0	0	0	0	0	0	0	0	0	0	0	0	0	0	0	FALSE
567	B2M	0	0	0	0	0	0	0	0	0	0	0	0	0	0	0	0	0	0	FALSE
8706	B3GALNT1	0	0	0	0	0	0	0	0	0	0	0	0	0	0	0	0	0	0	FALSE
148789	B3GALNT2	0	0	0	0	0	0	0	0	0	0	0	0	0	0	0	0	0	0	FALSE
8708	B3GALT1	0	0	0	0	0	0	0	0	0	0	0	0	0	0	0	0	0	0	FALSE
8707	B3GALT2	0	0	0	0	0	0	0	0	0	0	0	0	0	0	0	0	0	0	FALSE
8705	B3GALT4	0	0	0	0	0	0	0	0	0	0	0	0	0	0	0	0	0	0	FALSE
10317	B3GALT5	0	0	0	0	0	0	0	0	0	0	0	0	0	0	0	0	0	0	FALSE
126792	B3GALT6	0	0	0	0	0	0	0	0	0	0	0	0	0	0	0	0	0	0	FALSE
27087	B3GAT1	0	0	0	0	0	0	0	0	0	0	0	0	0	0	0	0	0	0	FALSE
135152	B3GAT2	0	0	0	0	0	0	0	0	0	0	0	0	0	0	0	0	0	0	FALSE
26229	B3GAT3	0	0	0	0	0	0	0	0	0	0	0	0	0	0	0	0	0	0	FALSE
145173	B3GLCT	0	0	0	0	0	0	0	0	0	0	0	0	0	0	0	0	0	0	FALSE
10678	B3GNT2	0	0	0	0	0	0	0	0	0	0	0	0	0	0	0	0	0	0	FALSE
10331	B3GNT3	0	0	0	0	0	0	0	0	0	0	0	0	0	0	0	0	0	0	FALSE
79369	B3GNT4	0	0	0	0	0	0	0	0	0	0	0	0	0	0	0	0	0	0	FALSE
84002	B3GNT5	0	0	0	0	0	0	0	0	0	0	0	0	0	0	0	0	0	0	FALSE
192134	B3GNT6	0	0	0	0	0	0	0	0	0	0	0	0	0	0	0	0	0	0	FALSE
374907	B3GNT8	0	0	0	0	0	0	0	0	0	0	0	0	0	0	0	0	0	0	FALSE
146712	B3GNTL1	0	0	0	0	0	0	0	0	0	0	0	0	0	0	0	0	0	0	FALSE
2583	B4GALNT1	0	0	0	0	0	0	0	0	0	0	0	0	0	0	0	0	0	0	FALSE
124872	B4GALNT2	0	0	0	0	0	0	0	0	0	0	0	0	0	0	0	0	0	0	FALSE
283358	B4GALNT3	0	0	0	0	0	0	0	0	0	0	0	0	0	0	0	0	0	0	FALSE
338707	B4GALNT4	0	0	0	0	0	0	0	0	0	0	0	0	0	0	0	0	0	0	FALSE
2683	B4GALT1	0	0	0	0	0	0	0	0	0	0	0	0	0	0	0	0	0	0	FALSE
8704	B4GALT2	0	0	0	0	0	0	0	0	0	0	0	0	0	0	0	0	0	0	FALSE
8703	B4GALT3	0	0	0	0	0	0	0	0	0	0	0	0	0	0	0	0	0	0	FALSE
8702	B4GALT4	0	0	0	0	0	0	0	0	0	0	0	0	0	0	0	0	0	0	FALSE
9334	B4GALT5	0	0	0	0	0	0	0	0	0	0	0	0	0	0	0	0	0	0	FALSE
11285	B4GALT7	0	0	0	0	0	0	0	0	0	0	0	0	0	0	0	0	0	0	FALSE
27077	B9D1	0	0	0	0	0	0	0	0	0	0	0	0	0	0	0	0	0	0	FALSE
79870	BAALC	0	0	0	0	0	0	0	0	0	0	0	0	0	0	0	0	0	0	FALSE
570	BAAT	0	0	0	0	0	0	0	0	0	0	0	0	0	0	0	0	0	0	FALSE
9577	BABAM2	0	0	0	0	0	0	0	0	0	0	0	0	0	0	0	0	0	0	FALSE
23621	BACE1	0	0	0	0	0	0	0	0	0	0	0	0	0	0	0	0	0	0	FALSE
25825	BACE2	0	0	0	0	0	0	0	0	0	0	0	0	0	0	0	0	0	0	FALSE
571	BACH1	0	0	0	0	0	0	0	0	0	0	0	0	0	0	0	0	0	0	FALSE
60468	BACH2	0	0	0	0	0	0	0	0	0	0	0	0	0	0	0	0	0	0	FALSE
572	BAD	0	0	0	0	0	0	0	0	0	0	0	0	0	0	0	0	0	0	FALSE
573	BAG1	0	0	0	0	0	0	0	0	0	0	0	0	0	0	0	0	0	0	FALSE
9532	BAG2	0	0	0	0	0	0	0	0	0	0	0	0	0	0	0	0	0	0	FALSE
9531	BAG3	0	0	0	0	0	0	0	0	0	0	0	0	0	0	0	0	0	0	FALSE
9530	BAG4	0	0	0	0	0	0	0	0	0	0	0	0	0	0	0	0	0	0	FALSE
9529	BAG5	0	0	0	0	0	0	0	0	0	0	0	0	0	0	0	0	0	0	FALSE
7917	BAG6	0	0	0	0	0	0	0	0	0	0	0	0	0	0	0	0	0	0	FALSE
22893	BAHD1	0	0	0	0	0	0	0	0	0	0	0	0	0	0	0	0	0	0	FALSE
10458	BAIAP2	0	0	0	0	0	0	0	0	0	0	0	0	0	0	0	0	0	0	FALSE
55971	BAIAP2L1	0	0	0	0	0	0	0	0	0	0	0	0	0	0	0	0	0	0	FALSE
80115	BAIAP2L2	0	0	0	0	0	0	0	0	0	0	0	0	0	0	0	0	0	0	FALSE
8938	BAIAP3	0	0	0	0	0	0	0	0	0	0	0	0	0	0	0	0	0	0	FALSE
578	BAK1	0	0	0	0	0	0	0	0	0	0	0	0	0	0	0	0	0	0	FALSE
25805	BAMBI	0	0	0	0	0	0	0	0	0	0	0	0	0	0	0	0	0	0	FALSE
8815	BANF1	1	1	1	1	1	1	1	1	1	1	1	1	1	1	1	1	1	17	TRUE
140836	BANF2	0	0	0	0	0	0	0	0	0	0	0	0	0	0	0	0	0	0	FALSE
55024	BANK1	0	0	0	0	0	0	0	0	0	0	0	0	0	0	0	0	0	0	FALSE
8314	BAP1	0	0	0	0	0	0	0	0	0	1	0	0	1	0	0	0	0	2	FALSE
580	BARD1	1	0	1	0	0	0	0	0	1	1	0	1	0	0	0	0	0	5	FALSE
343472	BARHL2	0	0	0	0	0	0	0	0	0	0	0	0	0	0	0	0	0	0	FALSE
56033	BARX1	0	0	0	0	0	0	0	0	0	0	0	0	0	0	0	0	0	0	FALSE
8538	BARX2	0	0	0	0	0	0	0	0	0	0	0	0	0	0	0	0	0	0	FALSE
10409	BASP1	0	0	0	0	0	0	0	0	0	0	0	0	0	0	0	0	0	0	FALSE
10538	BATF	0	0	0	0	0	0	0	0	0	0	0	0	0	0	0	0	0	0	FALSE
116071	BATF2	0	0	0	0	0	0	0	0	0	0	0	0	0	0	0	0	0	0	FALSE
55509	BATF3	0	0	0	0	0	0	0	0	0	0	0	0	0	0	0	0	0	0	FALSE
581	BAX	0	0	0	0	0	0	0	0	0	0	0	0	0	0	0	0	0	0	FALSE
11177	BAZ1A	0	0	0	0	0	0	0	0	0	0	0	0	0	0	0	0	0	0	FALSE
9031	BAZ1B	0	0	0	0	0	0	0	0	0	0	0	0	0	0	0	0	0	0	FALSE
11176	BAZ2A	0	0	0	0	0	0	0	0	0	0	0	0	0	0	0	0	0	0	FALSE
29994	BAZ2B	0	0	0	0	0	0	0	0	0	0	0	0	0	0	0	0	0	0	FALSE
27113	BBC3	0	0	0	0	0	0	0	0	0	0	0	0	0	0	0	0	0	0	FALSE
8424	BBOX1	0	0	0	0	0	0	0	0	0	0	0	0	0	0	0	0	0	0	FALSE
582	BBS1	0	0	0	0	0	0	0	0	0	0	0	0	0	0	0	0	0	0	FALSE
583	BBS2	0	0	0	0	0	0	0	0	0	0	0	0	0	0	0	0	0	0	FALSE
585	BBS4	0	0	0	0	0	0	0	0	0	0	0	0	0	0	0	0	0	0	FALSE
129880	BBS5	0	0	0	0	0	0	0	0	0	0	0	0	0	0	0	0	0	0	FALSE
55212	BBS7	0	0	0	0	0	0	0	0	0	0	0	0	0	0	0	0	0	0	FALSE
27241	BBS9	0	0	0	0	0	0	0	0	0	0	0	0	0	0	0	0	0	0	FALSE
56987	BBX	0	0	0	0	0	0	0	0	0	0	0	0	0	0	0	0	0	0	FALSE
4059	BCAM	0	0	0	0	0	0	0	0	0	0	0	0	0	0	0	0	0	0	FALSE
63827	BCAN	0	0	0	0	0	0	0	0	0	0	0	0	0	0	0	0	0	0	FALSE
55973	BCAP29	0	0	0	0	0	0	0	0	0	0	0	0	0	0	0	0	0	0	FALSE
9564	BCAR1	0	0	1	0	0	0	1	0	1	1	0	1	1	0	0	1	0	7	FALSE
8412	BCAR3	0	0	0	0	0	0	0	0	0	0	0	0	0	0	0	0	0	0	FALSE
[truncated: 14,542 more rows]

## Sheet: S20_C80
EntrezID	GeneSymbol	bone	breast	central_nervous_system	colorectal	esophagus	gastric	kidney	leukemia	liver	lung	multiple_myeloma	ovary	pancreas	skin	upper_aerodigestive	urinary_tract	uterus	n_dependent_lineage	is_commonly_essential
[truncated: 15,847 more rows]

[truncated: 1 more sheets: CRISPR]
