# Supplementary material for: shinyDepMap, a tool to identify targetable cancer genes and their functional connections from Cancer Dependency Map data
Source: eLife. 2021 Feb 8;10:e57116. doi: 10.7554/eLife.57116 (PMC7924953; doi:10.7554/eLife.57116)
Supplement: Figure 5—source data 1. [file elife-57116-fig5-data1.xlsx]

## Sheet: shRNA
EntrezID	GeneSymbol	Cluster_Small	Cluster_Medium	Cluster_Large	Prob_Small	Prob_Medium	Prob_Large	tSNE_x	tSNE_y
8086	AAAS	S607	M424	L176	1	0.995	0.575	15.556	-54.591
13	AADAC	S520	M363	L172	1	1	1	106.604	-25.634
14	AAMP	S6	M11	L4	0.942	0.755	0.96	50.952	1.78
16	AARS	S11	M4	L6	0.995	1	1	89.766	-10.166
57505	AARS2	S657	M4	L6	0.98	0.512	1	81.561	-4.113
26574	AATF	S17	M14	L11	1	0.925	0.65	60.961	-16.928
9625	AATK	S647	M386	L194	1	1	1	-44.877	29.488
19	ABCA1	S460	M5	L5	0.6	0.706	0.995	-28.499	56.963
23456	ABCB10	S8	M5	L5	0.534	1	0.995	-38.424	43.581
8647	ABCB11	S42	M53	L3	1	1	0.421	45.575	51.427
340273	ABCB5	S649	M422	L100	1	0.945	0.46	68.203	41.768
22	ABCB7	S184	M164	L99	0.725	0.745	0.54	75.284	-22.2
23457	ABCB9	S102	M103	L65	1	0.97	0.6	25.178	86.227
215	ABCD1	S394	M296	L164	0.745	0.655	0.56	4.824	38.105
6059	ABCE1	S684	M11	L4	0	0.402	0.96	57.817	5.946
23	ABCF1	S6	M11	L4	0.942	0.755	0.96	50.191	0.841
26090	ABHD12	S4	M1	L2	0.873	1	1	-83.107	13.603
10006	ABI1	S248	M13	L9	0.503	0.995	0.945	87.408	34.117
22885	ABLIM3	S8	M5	L5	0.861	1	0.995	-41.986	50.084
31	ACACA	S426	M323	L156	1	1	0.995	76.539	-30.385
32	ACACB	S104	M23	L3	0.841	0.925	0.923	-23.287	25.023
80724	ACAD10	S198	M81	L4	1	0.928	0.992	39.836	8.883
84129	ACAD11	S98	M101	L74	0.902	0.945	0.31	10.053	7.422
28976	ACAD9	S9	M15	L15	1	1	1	27.734	-81.529
35	ACADS	S405	M75	L3	0.965	0.854	0.479	34.907	53.951
39	ACAT2	S468	M99	L2	0.535	0.655	0.985	-71.685	-6.776
22985	ACIN1	S582	M114	L12	0.995	0.841	0.58	28.215	-43.284
51554	ACKR4	S163	M69	L34	0.75	0.7	0.475	34.514	30.799
47	ACLY	S573	M403	L204	1	0.99	0.395	13.129	-35.491
50	ACO2	S68	M77	L20	1	1	0.425	12.107	-45.881
26027	ACOT11	S213	M196	L3	0.523	0.611	0.669	-3.137	56.906
10005	ACOT8	S389	M292	L160	1	1	0.835	-100.188	-16.846
8310	ACOX3	S677	M6	L7	0.8	0.974	0.995	56.456	61.977
390928	ACP7	S453	M341	L152	0.995	0.83	0.43	57.717	82.421
55	ACPP	S10	M1	L2	0.988	0.694	0.98	-90.055	-5.852
49	ACR	S30	M36	L2	1	0.73	0.99	-51.097	9.585
56	ACRV1	S171	M147	L1	0.945	0.43	0.969	-57.023	-59.453
2181	ACSL3	S156	M124	L31	0.82	0.515	0.693	-60.171	35.987
2182	ACSL4	S236	M141	L28	1	0.955	0.922	-53.858	-37.613
84532	ACSS1	S30	M36	L2	0.956	0.67	0.959	-50.407	7.111
60	ACTB	S48	M27	L14	1	0.995	0.584	9.333	49.263
345651	ACTBL2	S19	M18	L1	0.554	0.89	1	-46.111	-63.605
71	ACTG1	S48	M27	L14	1	0.995	0.584	8.754	49.198
72	ACTG2	S48	M27	L14	1	0.995	0.584	8.755	49.935
86	ACTL6A	S397	M105	L77	0.98	0.985	0.96	46.789	-50.218
10881	ACTL7A	S106	M10	L2	0.839	0.622	0.99	-65.281	-1.322
55860	ACTR10	S574	M198	L1	0.99	0.376	0.852	-13.714	-43.761
10121	ACTR1A	S543	M365	L1	0.755	0.432	0.729	-58.804	-75.977
10097	ACTR2	S614	M438	L9	1	0.83	0.915	89.995	31.696
10096	ACTR3	S548	M288	L126	1	1	0.905	-51.869	43.097
79913	ACTR5	S322	M195	L3	0.99	0.755	0.954	-3.181	21.011
64431	ACTR6	S397	M105	L77	0.98	0.985	0.96	47.229	-51.001
93973	ACTR8	S463	M318	L167	1	1	1	119.49	27.181
95	ACY1	S21	M10	L2	0.42	0.928	0.985	-60.141	-2.388
8728	ADAM19	S8	M5	L5	0.534	1	0.995	-37.319	43.893
2515	ADAM2	S588	M418	L2	0.85	0.63	0.979	-81.135	12.024
8745	ADAM23	S28	M26	L3	0.98	0.99	0.4	13.588	40.883
27299	ADAMDEC1	S307	M251	L117	0.955	0.813	0.59	-97.819	10.563
81792	ADAMTS12	S10	M1	L2	0.647	0.764	1	-90.333	-0.183
80070	ADAMTS20	S70	M51	L35	1	0.99	0.73	24.715	17.422
11033	ADAP1	S313	M229	L4	0.975	0.675	0.913	60.844	3.226
103	ADAR	S275	M211	L134	1	1	1	16.952	-60.825
112	ADCY6	S222	M192	L70	1	0.96	0.56	73.058	53.884
117	ADCYAP1R1	S22	M1	L2	0.869	0.98	1	-76.283	7.104
25960	ADGRA2	S509	M1	L2	0.398	0.798	1	-87.495	2.335
576	ADGRB2	S71	M47	L2	0.807	0.815	0.954	-69.594	-1.352
283383	ADGRD1	S391	M1	L2	0.545	0.756	1	-79.313	-6.386
221393	ADGRF4	S4	M1	L2	0.948	0.994	0.919	-78.671	16.567
139378	ADGRG4	S4	M1	L2	0.928	1	1	-83.042	18.479
64123	ADGRL4	S228	M1	L2	0.965	0.593	1	-88.09	19.425
125	ADH1B	S284	M219	L125	0.985	0.85	0.41	65.625	45.69
127	ADH4	S685	M158	L93	0.413	0.487	0.456	-8.144	17.98
128	ADH5	S286	M235	L135	1	1	0.985	-29.332	24.547
135	ADORA2A	S135	M131	L84	1	1	0.995	-26.792	-14.683
146	ADRA1D	S59	M20	L3	0.985	0.873	0.53	22.742	68.283
158	ADSL	S29	M33	L17	1	1	0.96	8.755	-41.448
84830	ADTRP	S49	M63	L10	0.979	0.843	0.639	8.543	-4.615
4301	AFDN	S39	M13	L9	0.575	1	0.945	80.649	35.04
10939	AFG3L2	S9	M15	L15	1	1	1	31.361	-76.276
175	AGA	S4	M1	L2	0.943	1	1	-81.468	19.976
178	AGL	S368	M276	L2	1	0.96	0.97	-92.664	13.158
27161	AGO2	S82	M90	L20	0.933	0.924	0.71	9.717	-51.437
56894	AGPAT3	S351	M264	L154	1	0.99	0.625	80.261	67.824
183	AGT	S89	M83	L37	1	1	0.85	17.071	-37.121
25909	AHCTF1	S220	M74	L33	1	1	0.915	22.961	4.372
191	AHCY	S78	M88	L21	1	1	0.88	21.097	-14.579
10768	AHCYL1	S175	M155	L45	0.985	0.975	0.335	-21.154	-3.63
196	AHR	S251	M29	L3	0.675	0.862	0.79	1.06	41.54
64853	AIDA	S665	M9	L1	0.79	0.536	1	-30.947	-75.097
9131	AIFM1	S686	M11	L4	0.658	0.651	0.905	60.929	-8.188
51390	AIG1	S23	M22	L16	0.99	0.99	0.935	-22.203	70.085
9447	AIM2	S257	M78	L49	0.99	0.938	0.765	-68.237	37.366
84962	AJUBA	S494	M351	L2	0.792	0.799	0.449	-83.554	46.042
8165	AKAP1	S235	M70	L5	0.81	0.74	0.824	-38.032	60.899
10327	AKR1A1	S156	M124	L31	0.6	0.71	0.877	-0.441	96.068
1646	AKR1C2	S317	M258	L3	0.995	0.625	0.518	17.267	62.623
5832	ALDH18A1	S4	M1	L2	0.538	0.637	0.954	-67.768	6.772
8854	ALDH1A2	S453	M341	L152	0.995	0.83	0.43	58.198	81.755
217	ALDH2	S99	M104	L64	0.905	0.556	0.422	-16.706	57.8
226	ALDOA	S221	M177	L111	1	0.995	0.48	34.427	-59.68
230	ALDOC	S308	M252	L3	1	0.875	0.495	15.492	27.882
144245	ALG10B	S99	M104	L64	0.74	0.558	0.403	-17.413	59.205
440138	ALG11	S1	M8	L8	1	1	1	78.138	-57.19
79868	ALG13	S11	M4	L6	0.864	1	1	93.158	-7.452
85365	ALG2	S16	M4	L6	0.555	1	1	89.462	-1.778
29880	ALG5	S65	M32	L19	0.55	0.7	0.206	24.872	51.75
247	ALOX15B	S20	M5	L5	0.878	0.695	0.995	-33.541	54.089
59344	ALOXE3	S103	M109	L29	0.898	0.862	0.705	-9.492	40.202
10189	ALYREF	S153	M149	L43	1	0.98	0.54	5.588	-21.923
262	AMD1	S118	M39	L3	0.97	0.715	0.52	23.508	63.186
139285	AMER1	S469	M328	L4	0.985	0.91	0.764	41.394	1.65
9949	AMMECR1	S246	M209	L55	1	0.385	0.69	-4.152	-64.288
154796	AMOT	S464	M12	L1	0.76	0.973	0.994	-9.802	-78.931
270	AMPD1	S8	M5	L5	0.858	1	0.995	-41.833	48.494
64682	ANAPC1	S272	M7	L4	0.955	0.55	0.96	61.004	14.353
25906	ANAPC15	S224	M2	L1	0.97	0.958	0.99	-64.294	-77.988
29882	ANAPC2	S16	M4	L6	0.503	1	1	89.786	-3.735
29945	ANAPC4	S108	M111	L36	1	0.91	0.445	64.606	12.621
51433	ANAPC5	S108	M111	L36	1	0.91	0.445	63.846	12.697
283	ANG	S4	M1	L2	0.995	1	1	-77.472	14.513
90806	ANGEL2	S334	M30	L3	0.769	0.911	0.697	-4.702	57.787
51378	ANGPT4	S124	M10	L2	0.97	0.659	0.99	-55.013	4.973
150709	ANKAR	S2	M6	L7	0.733	1	0.995	56.408	70.509
162282	ANKFN1	S22	M1	L2	0.847	0.975	1	-72.921	9.355
56172	ANKH	S218	M49	L3	0.595	0.655	0.862	-18.116	16.217
23141	ANKLE2	S225	M108	L72	1	1	1	-43.186	-25.986
29123	ANKRD11	S447	M344	L9	0.74	0.355	0.318	56.711	45.522
338692	ANKRD13D	S450	M313	L1	0.99	0.88	0.972	-52.848	-67.271
26057	ANKRD17	S635	M430	L171	1	1	0.995	-20.332	38.695
256006	ANKRD31	S2	M6	L7	1	1	0.995	63.795	66.284
390616	ANKRD34C	S3	M3	L1	0.834	0.955	0.905	-20.655	-49.025
54851	ANKRD49	S189	M156	L3	1	0.84	0.389	28.261	58.007
100287718	ANKRD66	S3	M3	L1	0.608	0.97	0.905	-15.881	-50.908
23294	ANKS1A	S437	M333	L4	0.985	0.55	0.939	52.719	19.691
54443	ANLN	S166	M139	L9	1	1	0.345	72.562	51.043
84168	ANTXR1	S38	M31	L3	0.76	0.766	0.735	6.173	21.844
8416	ANXA9	S326	M150	L5	1	0.675	0.98	-42.616	58.247
55435	AP1AR	S679	M2	L1	0.619	0.976	0.952	-50.06	-92.454
10053	AP1M2	S191	M199	L1	1	0.895	0.952	-21.821	-95.533
1173	AP2M1	S68	M77	L20	1	1	0.425	13.655	-45.032
1175	AP2S1	S68	M77	L20	1	1	0.425	13.885	-44.841
324	APC	S194	M175	L3	0.99	0.905	0.64	-18.835	2.453
336	APOA2	S636	M393	L210	1	0.98	0.905	-10.895	95.56
200316	APOBEC3F	S668	M1	L2	0.55	0.917	0.955	-81.305	23.056
8542	APOL1	S86	M2	L1	0.475	0.962	1	-56.351	-77.655
23780	APOL2	S192	M179	L2	0.695	0.425	0.99	-52.713	15.263
353	APRT	S183	M106	L5	0.51	0.464	0.995	-35.536	35.731
9716	AQR	S393	M1	L2	0.42	0.526	1	-63.425	20.366
372	ARCN1	S461	M1	L2	0.9	0.979	0.995	-84.32	21.374
9870	AREL1	S65	M32	L19	1	1	0.236	23.143	52.437
375	ARF1	S248	M13	L9	0.51	1	0.945	88.401	34.972
378	ARF4	S52	M56	L41	1	1	0.675	47.876	-26.036
55738	ARFGAP1	S200	M180	L29	0.955	0.515	0.739	-10.678	42.059
27236	ARFIP1	S210	M68	L5	1	0.97	0.963	-48.778	52.614
10139	ARFRP1	S320	M236	L3	1	0.49	0.894	-13.474	12.559
55082	ARGLU1	S205	M187	L31	0.5	0.51	0.399	-34.279	-32.528
79658	ARHGAP10	S212	M194	L7	1	0.74	0.791	54.329	55.23
84986	ARHGAP19	S80	M76	L54	0.995	0.995	0.975	-11.124	-27.781
58504	ARHGAP22	S533	M30	L3	0.96	0.549	0.702	-9.342	52.491
201176	ARHGAP27	S279	M25	L3	0.625	0.944	0.894	-6.513	14.823
9411	ARHGAP29	S687	M5	L5	0	0.803	0.905	-47.557	58.275
2909	ARHGAP35	S126	M123	L80	0.985	0.985	0.76	11.832	22.437
158763	ARHGAP36	S5	M7	L4	0.905	1	0.96	43.722	25.814
393	ARHGAP4	S29	M33	L17	1	1	0.96	6.341	-39.245
23526	ARHGAP45	S42	M53	L3	0.98	1	0.421	44.498	48.743
394	ARHGAP5	S512	M356	L4	0.99	0.81	0.267	17.883	47.626
64333	ARHGAP9	S99	M104	L64	0.52	0.98	0.824	-18.247	61.87
398	ARHGDIG	S285	M234	L133	1	1	0.745	-52.364	51.034
9181	ARHGEF2	S111	M102	L75	1	1	1	-38.284	25.453
100271715	ARHGEF33	S502	M7	L4	1	0.442	0.96	53.021	28.326
8289	ARID1A	S55	M37	L10	1	0.995	0.678	-8.801	-3.251
57492	ARID1B	S55	M37	L10	1	0.995	0.678	-8.779	-2.346
196528	ARID2	S501	M202	L110	0.545	0.747	0.278	41.06	35.871
10620	ARID3B	S361	M290	L4	1	0.865	0.954	43.879	-7.329
84159	ARID5B	S437	M333	L4	0.985	0.55	0.939	52.193	20.345
25820	ARIH1	S45	M40	L25	1	1	0.825	25.79	23.733
115761	ARL11	S435	M81	L4	0.77	0.653	0.988	43.037	7.049
10123	ARL4C	S587	M417	L170	1	1	0.965	-18.924	53.077
221079	ARL5B	S105	M42	L27	1	0.995	0.7	28.644	48.089
51329	ARL6IP4	S267	M9	L1	0.515	0.494	1	-34.318	-84.751
55156	ARMC1	S150	M146	L91	1	1	0.97	50.164	76.116
339541	ARMH1	S528	M368	L52	1	0.995	0.462	1.632	5.192
79591	ARMH3	S688	M9	L1	0	0.527	1	-34.999	-80.618
145407	ARMH4	S321	M220	L1	1	0.98	1	-44.689	-51.494
405	ARNT	S67	M43	L23	1	1	0.695	-15.978	-14.473
10552	ARPC1A	S54	M30	L3	1	0.96	0.697	-8.468	59.712
10095	ARPC1B	S482	M25	L3	0.805	0.95	0.894	-8.613	10.986
10109	ARPC2	S548	M288	L126	1	1	0.905	-51.92	43.08
10093	ARPC4	S614	M438	L9	1	0.83	0.915	89.884	31.842
10777	ARPP21	S252	M1	L2	0.62	0.837	0.975	-81.508	28.49
153642	ARSK	S96	M3	L1	0.58	0.995	0.905	-28.378	-48.443
136371	ASB10	S459	M309	L4	0.995	0.432	0.925	46.439	32.159
142685	ASB15	S435	M81	L4	0.77	0.653	0.988	42.777	6.454
84164	ASCC2	S336	M113	L39	0.99	0.965	0.62	-0.479	73.792
55723	ASF1B	S59	M20	L3	0.843	0.866	0.53	24.696	66.459
433	ASGR2	S120	M117	L18	1	0.925	0.505	39.033	-2.502
55870	ASH1L	S504	M233	L4	0.579	0.905	0.713	38.705	15.485
9070	ASH2L	S305	M105	L77	1	1	0.96	48.887	-54.075
41	ASIC1	S298	M245	L1	1	0.58	0.908	-16.732	-42.399
40	ASIC2	S416	M310	L2	0.97	0.655	0.861	-93.877	20.847
440	ASNS	S181	M160	L97	1	1	1	104.503	31.733
259266	ASPM	S224	M2	L1	0.97	0.958	0.99	-63.775	-77.979
151516	ASPRV1	S51	M62	L26	1	1	0.915	36.756	80.477
445	ASS1	S55	M37	L10	1	0.995	0.678	-9.018	-5.7
23245	ASTN2	S5	M7	L4	0.467	0.989	0.96	56.871	24.414
55210	ATAD3A	S107	M116	L4	1	0.65	0.929	52.665	11.759
83858	ATAD3B	S377	M11	L4	0.465	0.724	0.96	56.758	-2.906
467	ATF3	S146	M71	L14	1	0.925	0.797	6.123	90.226
468	ATF4	S181	M160	L97	1	1	1	104.025	31.691
84938	ATG4C	S522	M32	L19	0.9	0.669	0.206	26.898	52.655
10533	ATG7	S74	M5	L5	0.85	0.956	0.98	-26.931	47.229
471	ATIC	S222	M192	L70	1	0.96	0.56	72.815	54.153
84913	ATOH8	S127	M121	L83	0.98	0.944	0.815	-54.442	28.047
57205	ATP10D	S281	M221	L3	0.98	0.785	0.717	-12.477	24.626
476	ATP1A1	S29	M33	L17	1	1	0.96	6.757	-37.77
91419	ATP23	S26	M2	L1	0.96	0.958	1	-55.565	-85.533
488	ATP2A2	S52	M56	L41	1	1	0.675	49.406	-27.819
490	ATP2B1	S334	M30	L3	0.775	0.911	0.697	-3.237	59.31
495	ATP4A	S294	M242	L121	0.925	0.912	0.69	-18.595	-34.593
498	ATP5F1A	S9	M15	L15	1	1	1	31.168	-79.137
506	ATP5F1B	S9	M15	L15	1	1	1	31.401	-77.837
509	ATP5F1C	S678	M17	L2	0.685	0.945	0.994	-56.132	-19.337
513	ATP5F1D	S333	M259	L6	0.995	0.97	0.952	88.774	3.429
84833	ATP5MD	S3	M3	L1	0.805	0.995	0.905	-25.691	-45.387
521	ATP5ME	S13	M17	L2	1	0.945	0.994	-59.372	-18.404
9551	ATP5MF	S9	M15	L15	1	1	1	29.492	-77.07
9556	ATP5MPL	S352	M266	L1	1	0.965	1	-32.161	-95.305
10476	ATP5PD	S13	M17	L2	1	0.945	0.994	-59.884	-17.99
522	ATP5PF	S159	M28	L2	0.97	0.87	0.99	-57.861	14.706
539	ATP5PO	S9	M15	L15	1	1	1	29.99	-80.25
537	ATP6AP1	S82	M90	L20	1	0.995	0.775	13.935	-50.815
10159	ATP6AP2	S24	M4	L6	0.645	1	1	98.009	2.472
50617	ATP6V0A4	S259	M130	L3	1	0.93	0.228	-7.54	66.377
533	ATP6V0B	S11	M4	L6	0.995	1	1	90.982	-8.086
527	ATP6V0C	S82	M90	L20	1	0.995	0.775	14.176	-50.956
9114	ATP6V0D1	S71	M47	L2	0.949	0.915	0.938	-67.213	1.557
523	ATP6V1A	S82	M90	L20	1	0.995	0.775	12.245	-50.422
526	ATP6V1B2	S82	M90	L20	1	0.995	0.775	12.092	-50.525
528	ATP6V1C1	S23	M22	L16	1	1	0.935	-22.415	74.24
51382	ATP6V1D	S589	M4	L6	0.565	0.98	1	99.492	-16.21
9296	ATP6V1F	S11	M4	L6	0.995	1	1	90.708	-8.893
127124	ATP6V1G3	S33	M23	L3	1	0.995	0.923	-18.79	21.802
540	ATP7B	S403	M27	L14	0.595	0.667	0.396	14.824	81.197
545	ATR	S36	M44	L12	1	1	0.995	33.654	-31.99
51374	ATRAID	S3	M3	L1	0.984	0.995	0.905	-19.455	-57.035
84126	ATRIP	S36	M44	L12	1	1	0.995	35.574	-32.372
26033	ATRNL1	S72	M21	L3	0.935	0.718	0.944	-7.96	36.157
6314	ATXN7	S160	M1	L2	0.825	0.756	1	-90.294	-9.854
6790	AURKA	S408	M340	L3	1	0.985	0.36	28.25	75.569
54998	AURKAIP1	S13	M17	L2	0.995	0.945	0.994	-62.096	-19.739
9212	AURKB	S56	M64	L44	1	1	0.77	17.061	-29.269
553	AVPR1B	S311	M254	L3	1	0.925	0.485	34.69	67.772
158835	AWAT2	S536	M215	L2	0.935	0.57	0.833	-43.979	12.07
566	AZU1	S58	M1	L2	0.745	0.974	1	-84.071	4.006
145173	B3GLCT	S72	M21	L3	0.935	0.718	0.944	-6.951	35.359
10678	B3GNT2	S114	M100	L28	1	1	0.99	-60.238	-35.381
8703	B4GALT3	S23	M22	L16	0.995	0.99	0.92	-25.585	72.826
8702	B4GALT4	S161	M132	L85	1	1	0.98	-28.286	92.488
11285	B4GALT7	S54	M30	L3	0.76	0.923	0.697	-9.041	57.956
25825	BACE2	S8	M5	L5	0.521	1	0.995	-34.658	44.362
571	BACH1	S344	M135	L5	0.801	0.409	0.87	-32.995	32.306
573	BAG1	S608	M206	L63	0.985	0.539	0.405	19.191	31.339
9529	BAG5	S655	M10	L2	0.575	0.608	0.985	-48.781	3.502
8815	BANF1	S25	M2	L1	0.581	0.717	1	-41.072	-67.037
8314	BAP1	S188	M166	L103	0.856	0.778	0.53	-6.186	-14.291
580	BARD1	S219	M84	L12	0.995	0.73	0.99	29.147	-34.837
343472	BARHL2	S335	M218	L3	1	0.965	0.821	-17.538	9.759
10538	BATF	S369	M278	L100	1	1	0.87	64.738	39.385
581	BAX	S689	M453	L7	0.456	0.449	0.364	29.823	61.857
9031	BAZ1B	S46	M65	L46	0.995	0.995	0.995	86.911	19.166
27113	BBC3	S690	M195	L3	0	0.625	0.912	-12.006	30.243
55973	BCAP29	S10	M1	L2	0.621	0.765	1	-84.316	-8.332
9564	BCAR1	S12	M13	L9	0.575	1	0.945	86.542	38.707
10286	BCAS2	S648	M408	L211	0.995	0.975	0.735	83.01	-18.81
56647	BCCIP	S254	M224	L11	1	1	0.709	64.893	-31.997
598	BCL2L1	S649	M422	L100	1	0.945	0.46	68.171	41.715
10017	BCL2L10	S8	M5	L5	0.534	1	0.995	-38.413	43.013
83596	BCL2L12	S384	M68	L5	0.84	0.722	0.974	-44.683	48.82
9275	BCL7B	S145	M145	L32	0.955	0.955	0.76	30.567	2.328
9774	BCLAF1	S325	M73	L50	0.49	0.989	0.251	18.438	15.964
53630	BCO1	S310	M253	L128	0.99	0.98	0.95	-100.94	33.357
54880	BCOR	S360	M273	L142	1	1	0.91	-32.047	11.882
617	BCS1L	S9	M15	L15	1	1	1	29.967	-75.837
622	BDH1	S28	M26	L3	0.99	1	0.41	14.605	40.484
624	BDKRB2	S239	M173	L105	1	0.745	0.302	20.926	55.33
8678	BECN1	S20	M5	L5	0.995	0.695	0.995	-32.308	55.063
57596	BEGAIN	S116	M1	L2	0.865	0.565	1	-90.054	7.603
633	BGN	S5	M7	L4	0.942	1	0.96	44.479	24.89
274	BIN1	S207	M11	L4	0.75	0.737	0.955	43.273	-1.588
329	BIRC2	S60	M21	L3	0.953	0.985	0.918	-13.626	35.632
332	BIRC5	S56	M64	L44	1	1	0.77	16.564	-29.733
57448	BIRC6	S185	M165	L102	1	1	0.995	29.65	-96.207
112401	BIRC8	S110	M112	L66	1	1	0.665	-25.502	0.293
282991	BLOC1S2	S26	M2	L1	0.975	0.958	1	-54.083	-82.625
63915	BLOC1S5	S7	M2	L1	0.545	0.985	1	-49.987	-79.193
654	BMP6	S18	M12	L1	0.975	0.815	0.978	7.514	-88.501
658	BMPR1B	S550	M383	L168	1	0.975	0.405	33.407	75.832
9790	BMS1	S197	M178	L113	1	0.975	0.86	-34.557	-14.087
388962	BOLA3	S168	M128	L47	0.99	1	0.7	24.843	-21.155
23246	BOP1	S215	M200	L11	0.99	0.59	0.67	59.773	-20.659
128861	BPIFA3	S419	M316	L141	1	1	0.725	-32.469	-42.622
92747	BPIFB1	S691	M3	L1	0.41	0.907	0.9	-13.626	-47.081
2186	BPTF	S234	M115	L76	0.98	0.78	0.82	39.094	-54.752
673	BRAF	S575	M410	L42	0.99	0.99	0.879	20.909	-48.994
672	BRCA1	S219	M84	L12	0.995	0.725	0.995	29.845	-33.743
675	BRCA2	S332	M248	L118	1	0.711	0.665	6.892	-31.694
6046	BRD2	S80	M76	L54	0.995	0.995	0.975	-11.706	-27.064
23476	BRD4	S661	M385	L17	1	1	0.855	2.603	-34.481
29117	BRD7	S347	M345	L4	0.745	0.935	0.485	40.752	34.618
2972	BRF1	S16	M4	L6	0.555	1	1	88.894	-0.37
55290	BRF2	S24	M4	L6	0.58	1	1	95.641	1.374
55299	BRIX1	S495	M349	L175	0.985	0.995	0.523	-46.67	-15.917
25855	BRMS1	S436	M135	L5	0.97	0.653	0.99	-24.972	42.766
9024	BRSK2	S402	M40	L25	0.97	1	0.795	28.058	21.083
8927	BSN	S44	M9	L1	0.541	0.533	1	-27.228	-85.657
684	BST2	S209	M189	L59	0.951	0.962	0.675	-43.739	-98.737
90135	BTBD6	S345	M32	L19	0.925	0.865	0.237	24.705	55.769
55727	BTBD7	S692	M11	L4	0	0.725	0.96	57.83	-0.295
686	BTD	S349	M311	L26	1	0.94	0.571	41.838	77.069
689	BTF3	S184	M164	L99	1	0.975	0.535	56.15	-20.72
91408	BTF3L4	S344	M135	L5	0.845	0.395	0.995	-35.104	33.598
7832	BTG2	S213	M196	L3	0.995	0.905	0.751	1.766	37.401
151888	BTLA	S7	M2	L1	0.985	0.975	1	-54.373	-71.014
79908	BTNL8	S6	M11	L4	0.6	0.76	0.96	49.487	-3.634
8945	BTRC	S260	M24	L3	0.845	0.835	0.533	5.063	63.142
699	BUB1	S666	M360	L169	1	0.885	0.545	75.311	14.78
701	BUB1B	S105	M42	L27	1	0.995	0.677	31.321	47.27
9184	BUB3	S105	M42	L27	1	0.995	0.677	31.754	47.221
84811	BUD13	S552	M389	L198	1	0.995	0.93	87.339	-21.042
114049	BUD23	S642	M16	L13	0.95	1	1	58.133	-64.499
8896	BUD31	S40	M48	L30	0.995	1	0.97	47.817	-38.898
705	BYSL	S1	M8	L8	1	1	1	75.619	-61.33
387638	C10orf113	S26	M2	L1	0.79	0.891	0.984	-52.726	-86.739
53838	C11orf24	S202	M183	L3	1	0.695	0.934	-4.666	35.968
219833	C11orf45	S79	M89	L40	1	1	0.515	13.747	-15.973
79096	C11orf49	S173	M9	L1	0.81	0.533	1	-24.556	-89.963
54494	C11orf71	S449	M279	L57	1	0.89	0.25	6.945	55.27
121053	C12orf45	S44	M9	L1	0.541	0.533	1	-26.424	-87.228
146562	C16orf71	S483	M286	L1	1	0.709	0.953	-42.631	-70.961
100141515	C17orf99	S693	M454	L4	0.633	0.361	0.577	41.221	19.032
56913	C1GALT1	S494	M351	L2	0.844	0.825	0.497	-84.015	45.281
708	C1QBP	S75	M80	L58	0.595	0.91	0.695	36.103	-78.596
114904	C1QTNF6	S134	M142	L4	1	0.51	0.96	50.327	30.51
716	C1S	S74	M5	L5	0.742	0.989	0.99	-31.151	43.694
54955	C1orf109	S1	M8	L8	0.963	1	1	82.796	-52.956
79098	C1orf116	S505	M122	L79	0.91	0.935	0.477	-37.952	2.997
128061	C1orf131	S3	M3	L1	0.98	0.995	0.905	-21.307	-56.43
79630	C1orf54	S96	M3	L1	0.58	0.995	0.905	-28.694	-49.088
56245	C21orf62	S694	M9	L1	0	0.529	1	-36.686	-81.869
129852	C2orf73	S297	M244	L1	0.975	0.785	1	-37.685	-94.807
79669	C3orf52	S26	M2	L1	0.975	0.958	1	-53.665	-82.848
100190949	C5orf52	S625	M448	L1	0.84	0.561	0.928	-29.199	-36.526
347744	C6orf52	S432	M172	L1	1	0.74	0.897	-24.073	-40.828
730	C7	S425	M322	L5	1	0.965	0.692	-43.404	42.611
157773	C8orf48	S3	M3	L1	0.965	0.995	0.905	-25.563	-56.432
257169	C9orf43	S440	M9	L1	0.685	0.664	0.818	-37.563	-74.513
759	CA1	S272	M7	L4	0.955	0.55	0.96	61.083	15.401
23523	CABIN1	S288	M237	L137	1	1	0.98	-5.245	-30.075
56344	CABP5	S447	M344	L9	0.74	0.355	0.318	55.761	45.597
85438	CABS1	S288	M237	L137	1	1	0.98	-3.91	-29.779
11094	CACFD1	S53	M9	L1	0.672	0.514	1	-41.173	-90.146
774	CACNA1B	S656	M406	L193	1	1	0.975	-31.27	18.236
775	CACNA1C	S102	M103	L65	1	0.97	0.6	25.256	85.62
8911	CACNA1I	S695	M5	L5	0.818	0.519	0.563	88.243	9.278
55799	CACNA2D3	S292	M1	L2	0.655	0.692	0.95	-79.951	2.395
782	CACNB1	S77	M5	L5	0.968	0.949	0.995	-28.34	41.347
784	CACNB3	S42	M53	L3	0.952	1	0.421	40.565	52.653
27091	CACNG5	S414	M337	L2	0.985	0.7	0.845	-90.177	29.258
790	CAD	S29	M33	L17	1	1	0.96	8.503	-39.426
285782	CAGE1	S696	M348	L1	0	0.573	0.663	-42.406	-65.562
800	CALD1	S232	M7	L4	0.515	0.444	0.96	56.599	12.58
805	CALM2	S48	M27	L14	1	0.995	0.584	8.508	50.783
815	CAMK2A	S38	M31	L3	0.995	1	0.929	5.23	21.56
816	CAMK2B	S339	M204	L3	0.89	0.57	0.692	-12.932	60.565
818	CAMK2G	S474	M167	L3	0.595	0.178	0.579	17.059	69.541
55450	CAMK2N1	S32	M19	L3	0.832	0.98	0.96	0.351	29.094
84254	CAMKK1	S103	M109	L29	0.99	1	0.72	-21.258	30.12
55832	CAND1	S34	M35	L4	0.995	0.631	0.951	67.421	18.074
822	CAPG	S116	M1	L2	0.82	0.565	1	-89.025	8.318
824	CAPN2	S67	M43	L23	1	1	0.695	-15.996	-16.791
65981	CAPRIN2	S291	M7	L4	0.692	0.993	0.887	57.749	25.213
832	CAPZB	S262	M158	L93	0.97	0.62	0.508	-12.1	17.36
64170	CARD9	S111	M102	L75	0.985	0.985	0.985	-38.109	24.487
833	CARS	S110	M112	L66	1	1	0.665	-26.598	-1.475
79587	CARS2	S31	M12	L1	0.99	0.98	0.994	-11.732	-83.753
9607	CARTPT	S138	M2	L1	0.99	0.977	0.98	-44.181	-86.085
846	CASR	S314	M257	L3	1	0.855	0.535	11.235	64.315
729438	CASTOR2	S274	M2	L1	0.34	0.958	1	-45.628	-84.443
257062	CATSPERD	S318	M3	L1	0.615	0.995	0.905	-29.771	-53.003
9139	CBFA2T2	S620	M452	L195	0.885	0.483	0.37	33.742	27.34
865	CBFB	S236	M141	L28	1	0.955	0.922	-53.967	-38.236
79872	CBLL1	S194	M175	L3	0.99	0.905	0.64	-18.677	1.71
84869	CBR4	S182	M162	L101	1	1	0.835	30.199	35.891
55871	CBWD1	S6	M11	L4	0.991	0.755	0.96	55.463	-0.312
54862	CC2D1A	S186	M1	L2	0.94	0.928	0.995	-75.736	32.225
55749	CCAR1	S100	M38	L24	1	0.995	0.65	14.975	13.004
57805	CCAR2	S428	M326	L148	1	1	0.845	0.788	-25.716
153733	CCDC112	S7	M2	L1	1	0.946	1	-56.684	-71.662
93233	CCDC114	S360	M273	L142	1	1	0.91	-33.195	11.246
115948	CCDC151	S85	M45	L1	1	0.985	0.663	-17.059	-68.665
203238	CCDC171	S697	M455	L212	0	0	0	2.487	-69.974
28952	CCDC22	S164	M3	L1	0.57	0.976	0.905	-18.384	-62.63
79714	CCDC51	S618	M435	L1	1	0.895	0.994	-16.54	-87.134
80323	CCDC68	S596	M423	L2	0.795	0.595	0.934	-67.465	-28.86
64925	CCDC71	S518	M447	L2	0.8	0.415	0.601	-63.922	31.901
338657	CCDC84	S1	M8	L8	0.925	1	1	73.973	-52.541
80212	CCDC92	S133	M129	L1	1	0.97	0.893	-29.878	-65.486
54520	CCDC93	S22	M1	L2	0.88	0.98	1	-75.005	6.661
257236	CCDC96	S291	M7	L4	0.77	0.992	0.819	59.719	25.832
885	CCK	S8	M5	L5	0.534	1	0.995	-36.502	43.132
6364	CCL20	S116	M1	L2	0.86	0.565	1	-89.576	3.675
6370	CCL25	S115	M28	L2	0.959	0.784	0.99	-61.651	11.007
10850	CCL27	S10	M1	L2	0.99	0.765	1	-85.226	-5.218
9560	CCL4L2	S484	M283	L33	0.985	0.48	0.429	6.441	60.226
8900	CCNA1	S698	M13	L9	0.362	0.432	0.43	23.242	-10.192
890	CCNA2	S90	M96	L48	1	0.995	0.725	67.214	31.038
891	CCNB1	S90	M96	L48	1	0.995	0.725	66.492	31.734
85417	CCNB3	S28	M26	L3	0.99	1	0.41	14.599	39.597
892	CCNC	S93	M97	L2	0.99	0.979	0.91	-85.898	36.019
595	CCND1	S169	M52	L38	1	1	0.87	43.93	68.828
894	CCND2	S699	M41	L10	0	0.69	0.818	-5.991	-8.451
896	CCND3	S540	M416	L186	1	1	1	-38.161	78.181
898	CCNE1	S417	M314	L162	0.945	0.925	0.79	93.244	-29.155
10983	CCNI	S289	M238	L10	0.99	0.88	0.69	0	-3.265
8812	CCNK	S214	M114	L12	1	0.875	0.58	30.967	-42.818
904	CCNT1	S458	M335	L3	1	0.985	0.371	39.802	61.547
10576	CCT2	S178	M7	L4	0.945	0.423	0.955	60.291	10.708
7203	CCT3	S178	M7	L4	0.945	0.423	0.955	59.887	10.704
10575	CCT4	S25	M2	L1	0.584	0.752	1	-39.998	-64.033
22948	CCT5	S244	M203	L2	0.995	0.975	0.513	-47.259	-15.136
908	CCT6A	S228	M1	L2	0.965	0.593	1	-89.77	18.506
10574	CCT7	S178	M7	L4	0.945	0.434	0.96	59.132	11.379
10694	CCT8	S25	M2	L1	0.965	0.748	1	-38.843	-66.399
150160	CCT8L2	S246	M209	L55	1	0.385	0.69	-2.998	-64.485
977	CD151	S117	M60	L2	0.96	0.57	0.964	-63.762	4.687
913	CD1E	S203	M201	L57	0.995	0.985	0.405	51.429	45.519
914	CD2	S39	M13	L9	0.51	0.835	0.78	79.495	33.647
124599	CD300LB	S5	M7	L4	0.626	0.933	0.96	48.169	15.985
10849	CD3EAP	S6	M11	L4	0.718	0.545	0.955	53.148	-11.3
917	CD3G	S537	M5	L5	0.37	0.934	0.995	-33.448	46.14
958	CD40	S131	M1	L2	0.82	0.775	1	-84.065	-3.05
959	CD40LG	S58	M1	L2	0.745	0.974	1	-84.364	4.483
960	CD44	S251	M29	L3	0.685	0.822	0.754	2.604	42.246
961	CD47	S700	M456	L126	0.75	0.517	0.505	-48.545	44.385
966	CD59	S22	M1	L2	0.689	0.959	1	-73.8	5.519
924	CD7	S8	M5	L5	0.902	1	0.995	-35.506	49.292
974	CD79B	S301	M27	L14	0.89	0.61	0.725	7.687	45.932
8832	CD84	S284	M219	L125	0.985	0.85	0.41	64.596	45.805
83692	CD99L2	S3	M3	L1	0.97	0.995	0.905	-27.339	-53.917
978	CDA	S682	M7	L4	0.9	0.828	0.955	51.28	25.494
146059	CDAN1	S11	M4	L6	0.995	1	1	90.868	-9.139
8872	CDC123	S1	M8	L8	0.963	1	1	84.245	-55.181
8556	CDC14A	S170	M120	L69	1	0.96	0.33	15.935	56.943
8555	CDC14B	S54	M30	L3	1	0.96	0.697	-7.628	61.052
8881	CDC16	S1	M8	L8	1	1	1	79.236	-56.973
991	CDC20	S482	M25	L3	0.805	0.935	0.882	-8.995	9.505
8697	CDC23	S108	M111	L36	1	0.91	0.445	64.651	12.994
994	CDC25B	S90	M96	L48	1	0.995	0.725	67.584	30.714
246184	CDC26	S481	M295	L59	0.97	0.875	0.415	-11.646	-66.099
996	CDC27	S108	M111	L36	0.6	0.745	0.42	28.387	-15.299
11140	CDC37	S69	M41	L10	0.98	0.755	0.81	-4.174	-10.18
51362	CDC40	S79	M89	L40	1	1	0.515	14.396	-12.256
998	CDC42	S39	M13	L9	0.575	1	0.945	80.836	34.498
23580	CDC42EP4	S33	M23	L3	1	0.995	0.923	-16.747	21.34
8318	CDC45	S144	M138	L13	1	0.945	1	56.636	-68.531
988	CDC5L	S490	M301	L2	0.95	0.765	0.947	-94.823	26.533
990	CDC6	S14	M16	L13	0.99	1	1	55.925	-60.79
8317	CDC7	S358	M38	L24	0.955	0.986	0.67	13.935	16.952
79577	CDC73	S100	M38	L24	1	0.995	0.65	15.496	10.585
113130	CDCA5	S480	M289	L153	0.995	0.89	0.51	-63.009	-5.534
83879	CDCA7	S50	M9	L1	0.935	0.553	1	-31.425	-78.887
55143	CDCA8	S11	M4	L6	0.615	1	1	86.657	-8.458
1009	CDH11	S92	M118	L52	1	1	0.48	-24.672	8.538
1014	CDH16	S235	M70	L5	0.81	0.74	0.824	-37.54	59.445
64403	CDH24	S47	M29	L3	0.98	0.939	0.805	-1.741	46.695
1006	CDH8	S520	M363	L172	1	1	1	106.6	-25.63
10423	CDIPT	S15	M4	L6	0.81	0.99	1	95.628	-8.277
983	CDK1	S90	M96	L48	1	0.995	0.725	67.374	29.838
728642	CDK11A	S633	M440	L40	1	0.55	0.518	11.502	-15.501
984	CDK11B	S163	M69	L34	0.755	0.69	0.475	32.55	32.313
51755	CDK12	S214	M114	L12	1	0.875	0.58	31.095	-43.243
8621	CDK13	S98	M101	L74	0.901	0.945	0.31	10.637	5.487
1017	CDK2	S417	M314	L162	0.945	0.925	0.79	93.148	-28.727
10263	CDK2AP2	S84	M92	L60	0.97	0.97	0.945	-65.383	45.83
1019	CDK4	S169	M52	L38	1	1	0.87	43.951	68.842
51654	CDK5RAP1	S669	M331	L2	0.865	0.73	0.97	-71.134	6.392
55755	CDK5RAP2	S224	M2	L1	0.97	0.958	0.99	-62.337	-77.889
1021	CDK6	S540	M416	L186	1	1	1	-38.159	78.188
1022	CDK7	S151	M148	L51	1	0.71	0.245	15.799	5.494
1024	CDK8	S572	M20	L3	0.61	0.937	0.53	24.69	70.018
1025	CDK9	S661	M385	L17	1	1	0.855	2.656	-34.582
54901	CDKAL1	S118	M39	L3	0.97	0.715	0.52	24.113	63.983
6792	CDKL5	S118	M39	L3	0.927	0.628	0.51	20.889	64.326
81620	CDT1	S606	M6	L7	0.645	0.916	0.92	67.613	77.171
1087	CEACAM7	S465	M343	L4	1	0.61	0.955	49.342	3.916
1050	CEBPA	S14	M16	L13	0.94	1	1	51.446	-61.861
1054	CEBPG	S37	M24	L3	1	1	0.533	-0.511	66.429
10153	CEBPZ	S17	M14	L11	0.895	0.925	0.65	62.425	-18.553
1990	CELA1	S4	M1	L2	1	1	1	-75.959	19.814
56853	CELF4	S99	M104	L64	0.52	0.98	0.824	-17.959	60.761
9620	CELSR1	S23	M22	L16	1	1	0.935	-24.191	74.914
1952	CELSR2	S132	M127	L2	0.96	0.695	1	-95.594	-7.761
57214	CEMIP	S290	M240	L1	0.975	0.764	1	-64.174	-83.044
1058	CENPA	S476	M140	L86	1	1	0.79	-2.641	-19.144
1059	CENPB	S297	M244	L1	0.975	0.785	1	-36.626	-92.717
1060	CENPC	S57	M54	L1	1	0.865	0.88	-50.331	-50.127
1062	CENPE	S666	M360	L169	1	0.885	0.545	75.36	14.811
2491	CENPI	S602	M409	L1	0.92	0.503	0.722	-21.678	-86.576
64105	CENPK	S1	M8	L8	0.963	1	1	82.251	-56.639
79019	CENPM	S237	M9	L1	0.595	0.543	1	-28.991	-80.617
55839	CENPN	S15	M4	L6	0.75	0.99	1	97.08	-4.709
79172	CENPO	S4	M1	L2	0.661	0.98	1	-79.622	25.451
80152	CENPT	S240	M93	L1	0.995	0.475	0.468	-9.393	-68.385
387103	CENPW	S240	M93	L1	0.985	0.475	0.462	-9.167	-69.031
55125	CEP192	S7	M2	L1	0.923	0.975	1	-50.523	-71.804
80184	CEP290	S701	M2	L1	0.384	0.839	0.99	-42.344	-86.303
85459	CEP295	S3	M3	L1	0.88	0.995	0.905	-23.19	-47.867
55165	CEP55	S88	M66	L22	0.984	0.995	0.86	33.537	-19.484
10390	CEPT1	S132	M127	L2	0.96	0.695	1	-93.371	-8.977
204219	CERS3	S71	M47	L2	0.938	0.905	0.938	-67.116	2.597
253782	CERS6	S331	M2	L1	0.714	0.6	0.955	-38.767	-52.544
23491	CES3	S405	M75	L3	0.965	0.854	0.479	35.617	53.156
283848	CES4A	S136	M125	L82	0.975	0.879	0.667	51.736	61.826
56683	CFAP298	S204	M8	L8	0.54	1	1	79.826	-60.989
55779	CFAP44	S359	M271	L7	0.89	0.7	0.975	64.395	61.301
146845	CFAP52	S107	M116	L4	0.64	0.535	0.96	50.024	11.283
10877	CFHR4	S660	M433	L3	0.985	0.75	0.832	4.157	24.868
1072	CFL1	S262	M158	L93	0.97	0.62	0.508	-11.51	17.659
8837	CFLAR	S266	M226	L132	1	1	1	17.742	-69.105
1080	CFTR	S70	M51	L35	1	0.99	0.73	24.281	15.156
150356	CHADL	S3	M3	L1	0.678	0.959	0.905	-18.418	-51.288
10036	CHAF1A	S452	M140	L86	0.995	0.973	0.79	-3.778	-22.054
8208	CHAF1B	S452	M140	L86	0.995	0.973	0.79	-3.686	-21.755
1105	CHD1	S39	M13	L9	0.575	1	0.945	81.004	32.883
1106	CHD2	S74	M5	L5	0.749	0.989	0.99	-30.17	45.129
1107	CHD3	S66	M79	L4	0.983	0.74	0.93	49.774	-12.023
1108	CHD4	S455	M113	L39	1	0.848	0.595	-0.297	77.195
55636	CHD7	S476	M140	L86	1	1	0.79	-3.688	-18.922
57680	CHD8	S38	M31	L3	1	0.995	0.947	1.479	18.867
1111	CHEK1	S36	M44	L12	1	1	0.995	35.002	-33.336
10523	CHERP	S16	M4	L6	0.545	1	1	89.773	1.024
1116	CHI3L1	S525	M5	L5	0.985	0.473	0.985	-44.235	55.016
1117	CHI3L2	S702	M10	L2	0.418	0.382	0.98	-61.574	3.2
1122	CHML	S455	M113	L39	1	0.848	0.595	0.045	76.27
27243	CHMP2A	S25	M2	L1	0.951	0.746	1	-36.719	-63.887
51652	CHMP3	S25	M2	L1	0.951	0.746	1	-36.974	-64.25
128866	CHMP4B	S1	M8	L8	0.963	1	1	86.807	-54.095
51510	CHMP5	S1	M8	L8	0.903	1	1	84.201	-58.954
79643	CHMP6	S1	M8	L8	1	1	1	79.764	-58.149
91782	CHMP7	S6	M11	L4	0.606	0.76	0.96	50.056	-1.713
26973	CHORDC1	S1	M8	L8	0.963	1	1	83.457	-52.856
8646	CHRD	S76	M10	L2	0.85	0.948	0.98	-50.913	-9.139
57053	CHRNA10	S314	M257	L3	1	0.855	0.535	10.451	64.458
1140	CHRNB1	S63	M25	L3	0.642	0.68	0.893	-2.296	13.582
1143	CHRNB4	S421	M5	L5	0.595	0.672	0.995	-38.869	57.24
8534	CHST1	S174	M157	L3	1	0.955	0.801	9.603	28.356
23563	CHST5	S260	M24	L3	0.845	0.835	0.533	3.723	63.333
63922	CHTF18	S562	M396	L12	1	0.995	0.661	39.142	-40.391
54921	CHTF8	S1	M8	L8	0.963	1	1	87.307	-53.807
51647	CIAO2B	S1	M8	L8	0.979	1	1	80.899	-51.258
64428	CIAO3	S1	M8	L8	1	1	1	77.87	-56.574
57019	CIAPIN1	S1	M8	L8	0.715	1	1	71.077	-57.351
51550	CINP	S15	M4	L6	0.915	0.99	1	97.084	-8.758
57650	CIP2A	S415	M308	L1	0.89	0.795	0.543	-20.01	-74.431
1153	CIRBP	S69	M41	L10	1	0.755	0.815	-2.536	-9.998
11113	CIT	S539	M6	L7	0.764	1	0.995	59.605	61.484
4435	CITED1	S1	M8	L8	0.978	1	1	75.918	-51.289
9793	CKAP5	S88	M66	L22	1	1	0.865	34.214	-21.723
1152	CKB	S101	M20	L3	0.511	0.96	0.53	24.907	72.544
1159	CKMT1B	S92	M118	L52	1	1	0.48	-23.611	9.586
1160	CKMT2	S308	M252	L3	0.99	0.875	0.485	17.097	27.289
1163	CKS1B	S36	M44	L12	1	1	0.995	34.027	-34.585
1182	CLCN3	S291	M7	L4	0.77	0.992	0.819	58.718	26.689
23562	CLDN14	S8	M5	L5	0.645	0.995	0.995	-35.951	46.21
10462	CLEC10A	S131	M1	L2	0.82	0.775	1	-83.942	-0.813
29121	CLEC2D	S90	M96	L48	1	0.995	0.725	68.48	30.456
23601	CLEC5A	S5	M7	L4	0.827	0.985	0.96	42.873	27.356
1192	CLIC1	S66	M79	L4	1	0.755	0.895	47.29	-14.225
25932	CLIC4	S228	M1	L2	0.965	0.593	1	-89.329	19.973
1207	CLNS1A	S559	M375	L6	1	0.95	0.994	78.738	-1.791
10978	CLP1	S59	M20	L3	0.985	0.873	0.53	22.633	69.416
81570	CLPB	S433	M329	L161	1	1	0.975	-2.865	-41.842
8192	CLPP	S29	M33	L17	1	1	0.96	3.609	-39.243
63967	CLSPN	S195	M152	L4	0.98	0.325	0.965	43.771	2.896
1213	CLTC	S68	M77	L20	1	1	0.425	15.208	-45.784
23277	CLUH	S18	M12	L1	0.99	0.84	0.994	-2.38	-88.614
100272147	CMC4	S5	M7	L4	1	1	0.96	43.524	21.297
51727	CMPK1	S113	M58	L2	0.928	0.775	0.959	-40.816	-1.784
123920	CMTM3	S96	M3	L1	0.658	0.935	0.869	-31.394	-46.137
146223	CMTM4	S134	M142	L4	0.71	0.51	0.96	49.157	27.877
1261	CNGA3	S235	M70	L5	0.455	0.538	0.87	-39.808	52.665
1258	CNGB1	S324	M222	L63	0.995	0.809	0.398	21.853	31.351
29097	CNIH4	S1	M8	L8	0.963	1	1	83.443	-56.01
1265	CNN2	S448	M3	L1	0.99	0.976	0.899	-35.236	-49.192
23019	CNOT1	S19	M18	L1	0.747	0.836	0.923	-52.329	-42.098
25904	CNOT10	S50	M9	L1	0.77	0.556	1	-34.697	-75.814
4849	CNOT3	S24	M4	L6	0.6	1	1	97.536	5.683
9125	CNOT9	S371	M2	L1	0.53	0.782	0.995	-42.396	-92.116
124817	CNTD1	S5	M7	L4	0.827	0.985	0.96	44.432	29.014
22837	COBLL1	S230	M186	L4	1	0.98	0.952	62.545	-2.025
1690	COCH	S645	M413	L191	1	1	0.68	66.687	4.743
9382	COG1	S410	M265	L163	0.97	0.93	0.42	-6.4	-58.624
25839	COG4	S410	M265	L163	0.97	0.93	0.42	-5.88	-59.096
91949	COG7	S410	M265	L163	0.97	0.93	0.42	-6.675	-58.384
1302	COL11A2	S550	M383	L168	1	0.975	0.405	33.449	75.886
80781	COL18A1	S703	M457	L23	0	0	0.395	-15.536	-11.78
84570	COL25A1	S5	M7	L4	0.995	1	0.96	48.796	19.141
10087	COL4A3BP	S270	M207	L3	1	0.755	0.485	35.422	64.059
1293	COL6A3	S277	M70	L5	0.82	0.724	0.824	-35.762	60.659
1294	COL7A1	S99	M104	L64	0.885	0.54	0.404	-16.268	57.301
1295	COL8A1	S489	M24	L3	0.665	0.944	0.533	5.047	68.958
10584	COLEC10	S158	M133	L3	0.98	0.82	0.462	19.006	78.06
64326	COP1	S667	M405	L112	1	1	0.926	-36.665	-22.229
1314	COPA	S276	M212	L122	1	0.955	0.49	12.966	102.27
1315	COPB1	S19	M18	L1	0.636	0.889	1	-44.327	-62.739
9276	COPB2	S276	M212	L122	1	0.955	0.49	13.068	102.101
11316	COPE	S52	M56	L41	1	1	0.675	46.626	-26.133
22820	COPG1	S52	M56	L41	1	1	0.675	47.835	-26.198
9318	COPS2	S34	M35	L4	0.995	0.631	0.951	66.309	19.358
8533	COPS3	S34	M35	L4	0.995	0.631	0.951	66.247	18.694
51138	COPS4	S34	M35	L4	0.45	0.47	0.96	62.777	19.495
10987	COPS5	S34	M35	L4	0.995	0.631	0.951	67.438	19.512
10980	COPS6	S34	M35	L4	0.995	0.631	0.951	67.826	19.975
10920	COPS8	S34	M35	L4	0.995	0.631	0.951	67.399	19.471
22818	COPZ1	S276	M212	L122	1	0.955	0.49	13.423	101.782
56997	COQ8A	S118	M39	L3	0.865	0.665	0.46	25.561	63.687
79934	COQ8B	S119	M119	L10	1	0.875	0.277	-6.41	2.049
23603	CORO1C	S426	M323	L156	1	1	0.995	77.516	-29.693
84940	CORO6	S471	M15	L15	0.93	0.969	1	25.749	-74.656
1353	COX11	S9	M15	L15	1	1	1	26.628	-80.694
1327	COX4I1	S560	M374	L2	0.99	0.54	0.465	-55.523	-23.182
9377	COX5A	S13	M17	L2	1	0.945	0.994	-59.3	-17.18
1329	COX5B	S13	M17	L2	1	0.945	0.994	-58.216	-20.361
1345	COX6C	S140	M75	L3	1	1	0.503	33.51	56.931
1350	COX7C	S680	M436	L207	1	1	1	23.331	-85
51200	CPA4	S130	M1	L2	0.735	0.97	0.99	-83.701	24.975
132864	CPEB2	S555	M7	L4	0.55	0.46	0.96	57.34	9.666
55313	CPPED1	S412	M305	L9	0.99	0.675	0.764	77.452	50.63
29894	CPSF1	S4	M1	L2	1	1	1	-79.096	19.183
53981	CPSF2	S248	M13	L9	0.505	1	0.945	88.874	36.519
51692	CPSF3	S71	M47	L2	0.985	0.95	0.937	-70.872	1.665
10898	CPSF4	S11	M4	L6	0.995	1	1	89.238	-11.594
126129	CPT1C	S4	M1	L2	1	1	1	-74.747	17.038
1376	CPT2	S372	M280	L151	1	1	0.864	-13.276	2.044
56265	CPXM1	S506	M68	L5	0.56	0.936	0.963	-47.625	49.161
1378	CR1	S704	M71	L14	0	0.61	0.475	-22.79	67.573
1381	CRABP1	S351	M264	L154	1	0.99	0.625	80.14	66.762
27297	CRCP	S24	M4	L6	0.512	1	1	94.457	2.914
51232	CRIM1	S8	M5	L5	0.912	1	0.995	-38.467	50.177
1398	CRK	S12	M13	L9	0.575	1	0.945	86.952	37.542
1399	CRKL	S12	M13	L9	0.575	1	0.945	86.214	38.2
51340	CRNKL1	S231	M154	L95	1	0.995	0.495	-45.089	-9.404
49860	CRNN	S320	M236	L3	1	0.49	0.894	-13.027	11.682
55118	CRTAC1	S340	M262	L109	1	0.97	0.58	0.504	87.928
1414	CRYBB1	S326	M150	L5	1	0.675	0.98	-42.658	58.986
1418	CRYGA	S481	M295	L59	0.97	0.875	0.415	-12.349	-67.168
1419	CRYGB	S19	M18	L1	0.918	0.89	1	-45.617	-61.362
1421	CRYGD	S15	M4	L6	0.914	0.99	1	98.654	-10.104
51084	CRYL1	S47	M29	L3	0.98	0.939	0.805	-1.855	47.199
9946	CRYZL1	S193	M174	L107	0.995	1	1	109.798	9.781
1431	CS	S9	M15	L15	1	1	1	29.965	-81.264
1434	CSE1L	S106	M10	L2	0.935	0.691	0.99	-49.503	0.848
1436	CSF1R	S98	M101	L74	0.902	0.945	0.31	9.99	7.786
1439	CSF2RB	S64	M19	L3	0.939	0.71	0.965	-4.799	26.324
64478	CSMD1	S123	M95	L68	0.983	0.995	0.515	-16.811	87.431
1446	CSN1S1	S10	M1	L2	0.643	0.766	1	-87.772	-3.417
1452	CSNK1A1	S255	M107	L11	0.99	0.414	0.643	66.097	-26.872
1453	CSNK1D	S447	M344	L9	0.74	0.355	0.318	56.013	45.578
1459	CSNK2A2	S253	M67	L9	0.995	0.599	0.768	75.165	46.239
1460	CSNK2B	S89	M83	L37	0.99	0.955	0.856	20.944	-37.879
1464	CSPG4	S14	M16	L13	0.99	1	1	57.119	-58.793
128817	CSTL1	S4	M1	L2	0.875	1	1	-85.301	12.375
203413	CT83	S69	M41	L10	1	0.755	0.815	-3.456	-11.39
1487	CTBP1	S583	M419	L209	1	1	0.99	86.83	54.712
80169	CTC1	S91	M3	L1	0.555	0.741	0.885	-34.445	-62.675
10664	CTCF	S234	M115	L76	0.98	0.78	0.82	38.646	-55.411
140690	CTCFL	S123	M95	L68	1	1	0.51	-17.578	84.91
9150	CTDP1	S78	M88	L21	1	1	0.88	19.997	-17.473
10106	CTDSP2	S4	M1	L2	0.879	1	1	-83.364	15.364
51496	CTDSPL2	S57	M54	L1	0.613	0.94	0.54	-50.752	-48.783
1489	CTF1	S283	M232	L2	0.99	0.98	0.922	-96.3	1.935
1493	CTLA4	S47	M29	L3	0.694	0.957	0.766	1.526	46.338
1499	CTNNB1	S644	M108	L72	1	1	0.959	-40.343	-28.516
56998	CTNNBIP1	S190	M170	L21	0.99	0.825	0.815	16.289	-22.518
56259	CTNNBL1	S32	M19	L3	0.385	0.609	0.608	8.366	-0.166
56474	CTPS2	S4	M1	L2	0.868	0.929	1	-72.283	15.028
9646	CTR9	S61	M72	L53	1	1	0.37	33.019	-9.883
5476	CTSA	S4	M1	L2	0.661	0.98	1	-80.073	26.65
348180	CTU2	S209	M189	L59	0.955	0.955	0.622	-13.466	-62.471
8454	CUL1	S20	M5	L5	0.99	0.695	0.995	-30.601	55.272
8453	CUL2	S11	M4	L6	0.615	1	1	87.128	-9.186
8452	CUL3	S389	M292	L160	1	1	0.835	-100.011	-16.903
8450	CUL4B	S87	M1	L2	0.595	0.965	1	-70.267	20.759
9820	CUL7	S445	M339	L143	0.995	0.97	0.9	-65.241	-66.451
57703	CWC22	S478	M190	L22	0.99	0.595	0.64	32.895	-15.742
10283	CWC27	S510	M428	L2	0.925	0.251	0.989	-58.004	7.701
6387	CXCL12	S311	M254	L3	1	0.925	0.485	33.641	66.651
58191	CXCL16	S147	M1	L2	0.655	0.759	1	-81.356	-9.006
284340	CXCL17	S91	M3	L1	0.49	0.975	0.905	-16.104	-48.132
7852	CXCR4	S457	M43	L23	0.855	0.954	0.695	-18.861	-16.697
30827	CXXC1	S566	M398	L78	1	0.735	0.337	20.996	-9.684
1534	CYB561	S187	M28	L2	0.745	0.626	0.937	-56.56	18.957
79415	CYBC1	S2	M6	L7	1	1	0.995	66.716	67.241
1537	CYC1	S9	M15	L15	1	1	1	27.487	-80.349
54205	CYCS	S43	M12	L1	0.805	1	0.994	-0.071	-81.841
23191	CYFIP1	S25	M2	L1	0.965	0.748	1	-38.553	-65.342
340665	CYP26C1	S146	M71	L14	1	0.925	0.797	4.629	92.335
1572	CYP2F1	S166	M139	L9	1	1	0.345	70.952	49.332
54905	CYP2W1	S460	M5	L5	0.6	0.706	0.995	-28.881	56.588
126410	CYP4F22	S148	M143	L56	0.995	0.925	0.925	40.095	40.542
1603	DAD1	S52	M56	L41	0.995	0.995	0.67	49.51	-26.594
199699	DAND5	S57	M54	L1	0.64	0.84	0.89	-53.336	-52.379
1615	DARS	S179	M14	L11	0.865	0.919	0.648	66.086	-21.815
26528	DAZAP1	S6	M11	L4	0.667	0.742	0.96	56.753	-5.388
10926	DBF4	S358	M38	L24	0.955	0.986	0.67	13.925	17.048
51163	DBR1	S705	M16	L13	0.475	0.393	0.387	-5.319	71.07
285429	DCAF4L1	S107	M116	L4	0.64	0.535	0.96	50.179	11.311
139425	DCAF8L1	S227	M176	L108	0.995	0.925	0.825	57.465	34.742
9201	DCLK1	S706	M31	L3	0.64	0.604	0.896	0.903	20.458
64421	DCLRE1C	S707	M27	L14	0	0.97	0.584	6.71	48.854
28960	DCPS	S216	M78	L49	1	1	0.865	-66.712	39.357
1638	DCT	S233	M182	L3	1	0.63	0.789	6.733	33.925
1639	DCTN1	S21	M10	L2	0.425	0.933	0.99	-58.666	-3.493
11258	DCTN3	S1	M8	L8	0.979	1	1	78.399	-45.94
84516	DCTN5	S1	M8	L8	0.979	1	1	78.027	-48.676
10671	DCTN6	S1	M8	L8	0.979	1	1	78.285	-46.749
79077	DCTPP1	S3	M3	L1	0.723	0.995	0.905	-31.289	-55.379
51181	DCXR	S343	M1	L2	0.452	0.375	0.633	-56.296	29.465
1642	DDB1	S541	M35	L4	0.86	0.434	0.949	65.372	23.324
1644	DDC	S130	M1	L2	0.77	0.943	0.95	-86.228	28.116
23259	DDHD2	S370	M332	L157	1	1	0.635	-31.113	2.739
84301	DDI2	S77	M5	L5	0.968	0.949	0.995	-28.701	40.568
54541	DDIT4	S156	M124	L31	0.6	0.71	0.877	-0.919	96.775
1650	DDOST	S432	M172	L1	1	0.74	0.897	-23.394	-40.09
780	DDR1	S488	M336	L112	1	0.885	0.845	-39.796	-21.444
1662	DDX10	S2	M6	L7	1	1	0.995	69.179	69.56
10521	DDX17	S282	M86	L62	0.78	0.785	0.663	34.132	11.793
8886	DDX18	S17	M14	L11	0.895	0.925	0.65	63.78	-19.367
55308	DDX19A	S411	M110	L71	1	0.99	0.55	19.471	-5.337
11269	DDX19B	S189	M156	L3	1	0.84	0.389	28.798	59.212
9188	DDX21	S215	M200	L11	0.99	0.59	0.67	59.991	-21.873
9416	DDX23	S304	M59	L18	0.92	0.475	0.505	39.523	-10.174
57062	DDX24	S94	M98	L12	1	1	0.58	34.328	-45.508
55661	DDX27	S17	M14	L11	1	0.925	0.65	61.544	-16.249
10212	DDX39A	S541	M35	L4	0.86	0.434	0.949	65.578	23.782
7919	DDX39B	S78	M88	L21	1	1	0.88	19.493	-16.037
1654	DDX3X	S141	M59	L18	0.995	0.99	0.486	54.189	-36.177
54514	DDX4	S423	M320	L16	1	0.88	0.545	-12.848	70.95
51428	DDX41	S163	M69	L34	0.75	0.7	0.475	34.58	31.456
11325	DDX42	S466	M84	L12	0.995	0.748	0.979	29.329	-28.483
9879	DDX46	S36	M44	L12	0.67	0.914	0.99	32.652	-33.808
51202	DDX47	S338	M239	L136	1	0.98	0.515	-47.854	24.026
54555	DDX49	S337	M26	L3	0.855	0.887	0.392	22.763	36.244
1655	DDX5	S190	M170	L21	0.99	0.825	0.815	15.296	-21.301
317781	DDX51	S17	M14	L11	0.895	0.925	0.65	64.52	-20.14
11056	DDX52	S17	M14	L11	1	0.917	0.65	57.38	-12.939
79039	DDX54	S215	M200	L11	0.99	0.59	0.67	61.077	-22.041
54606	DDX56	S17	M14	L11	0.707	0.6	0.5	65.657	-15.606
1656	DDX6	S221	M177	L111	0.995	0.99	0.475	35.435	-58.436
50514	2021-12-01	S419	M316	L141	1	1	0.725	-33.345	-41.786
1670	DEFA5	S165	M136	L90	0.96	0.98	0.91	-44.016	18.583
123099	DEGS2	S708	M331	L2	0.549	0.487	0.985	-72.65	13.138
9909	DENND4B	S530	M3	L1	0.905	0.775	0.905	-30.521	-50.925
160518	DENND5B	S203	M201	L57	0.995	0.985	0.405	51.262	45.099
8562	DENR	S611	M3	L1	0.565	0.971	0.898	-31.777	-58.006
55635	DEPDC1	S274	M2	L1	0.34	0.958	1	-46.176	-84.584
51009	DERL2	S398	M2	L1	0.855	0.981	0.791	-6.723	-53.451
54487	DGCR8	S57	M54	L1	1	0.865	0.88	-49.596	-50.002
9162	DGKI	S42	M53	L3	1	1	0.421	43.34	51.503
1717	DHCR7	S124	M10	L2	0.98	0.659	0.99	-53.892	3.883
79947	DHDDS	S52	M56	L41	1	1	0.675	47.977	-28.395
1725	DHPS	S21	M10	L2	0.995	0.995	0.99	-52.671	-3.695
147015	DHRS13	S72	M21	L3	0.918	0.725	0.944	-7.127	33.877
1665	DHX15	S633	M440	L40	1	0.55	0.518	11.357	-15.515
8449	DHX16	S100	M38	L24	1	0.995	0.65	15.51	9.087
22907	DHX30	S9	M15	L15	1	1	1	29.069	-75.104
9704	DHX34	S238	M42	L27	0.975	0.964	0.663	28.653	44.509
170506	DHX36	S62	M50	L3	0.97	0.724	0.768	-1.335	53.41
57647	DHX37	S17	M14	L11	0.895	0.925	0.65	62.769	-20.057
9785	DHX38	S79	M89	L40	1	1	0.515	13.727	-15.143
1659	DHX8	S79	M89	L40	1	1	0.515	14.824	-11.594
1660	DHX9	S168	M128	L47	1	1	0.7	26.821	-21.657
56616	DIABLO	S4	M1	L2	0.946	0.972	1	-88.543	23.477
1729	DIAPH1	S316	M216	L32	1	0.655	0.53	35.075	17.39
27292	DIMT1	S709	M458	L4	0.451	0.471	0.593	61.573	-9.034
57609	DIP2B	S321	M220	L1	0.758	0.722	1	-46.27	-52.971
115752	DIS3L	S133	M129	L1	0.989	0.938	0.929	-29.911	-64.018
27185	DISC1	S73	M82	L1	0.48	0.605	0.995	-29.386	-71.373
1736	DKC1	S21	M10	L2	0.99	0.99	0.985	-53.422	-4.666
27123	DKK2	S655	M10	L2	0.575	0.608	0.985	-48.514	3.872
27122	DKK3	S130	M1	L2	0.77	0.943	0.95	-85.668	27.742
9231	DLG5	S485	M285	L51	1	0.995	0.96	41.22	-27.371
8788	DLK1	S255	M107	L11	0.925	0.414	0.583	66.656	-28.098
1743	DLST	S29	M33	L17	1	1	0.96	6.546	-39.919
1747	DLX3	S139	M67	L9	0.995	0.786	0.793	73.743	42.838
55929	DMAP1	S357	M270	L139	1	1	0.824	11.447	-25.387
123872	DNAAF1	S162	M2	L1	0.605	0.965	1	-59.96	-81.332
27019	DNAI1	S170	M120	L69	0.43	0.486	0.43	17.723	86.32
10294	DNAJA2	S306	M250	L2	0.985	0.98	0.993	-100.303	17.492
9093	DNAJA3	S180	M188	L2	0.985	0.69	0.977	-61.236	-11.327
79982	DNAJB14	S371	M2	L1	0.53	0.782	0.995	-43.205	-91.088
55735	DNAJC11	S73	M82	L1	1	0.91	0.995	-17.928	-79.519
55192	DNAJC17	S16	M4	L6	0.555	1	1	90.11	-0.205
131118	DNAJC19	S208	M7	L4	0.925	0.443	0.96	49.134	9.479
27000	DNAJC2	S2	M6	L7	0.899	1	0.995	67.518	74.324
85479	DNAJC5B	S6	M11	L4	0.942	0.755	0.96	53.205	1.999
285126	DNAJC5G	S236	M141	L28	0.579	0.55	0.484	-52.645	-41.317
7266	DNAJC7	S33	M23	L3	0.995	0.995	0.923	-20.027	24.236
22826	DNAJC8	S391	M1	L2	0.545	0.756	1	-78.708	-6.228
23234	DNAJC9	S1	M8	L8	0.963	1	1	84.613	-53.902
7802	DNALI1	S44	M9	L1	0.97	0.49	1	-29.106	-87.706
1776	DNASE1L3	S150	M146	L91	1	1	0.97	49.488	77.988
58511	DNASE2B	S187	M28	L2	0.7	0.802	0.99	-57.973	17.506
10059	DNM1L	S9	M15	L15	1	1	1	31.82	-81.309
1785	DNM2	S68	M77	L20	1	1	0.425	13.043	-44.106
1786	DNMT1	S621	M115	L76	0.995	0.775	0.819	40.982	-56.831
1789	DNMT3B	S270	M207	L3	1	0.755	0.485	35.566	63.78
116092	DNTTIP1	S406	M300	L2	1	0.905	0.994	-61.911	24.587
30836	DNTTIP2	S226	M1	L2	0.715	0.915	1	-78.133	11.596
9046	DOK2	S665	M9	L1	0.79	0.536	1	-30.863	-74.71
55715	DOK4	S347	M345	L4	0.755	0.93	0.485	40.716	33.495
29980	DONSON	S1	M8	L8	1	1	1	76.477	-56.183
9980	DOP1B	S33	M23	L3	1	0.995	0.923	-18.215	22.847
1798	DPAGT1	S24	M4	L6	0.645	1	1	97.276	2.276
64174	DPEP2	S287	M122	L79	0.975	0.908	0.495	-39.165	4.942
5977	DPF2	S436	M135	L5	0.97	0.653	0.99	-24.523	42.726
285381	DPH3	S1	M8	L8	0.979	1	1	76.328	-49.602
92715	DPH7	S6	M11	L4	0.94	0.75	0.96	51.931	-6.021
8818	DPM2	S586	M1	L2	0.605	0.764	1	-81.315	-11.713
57628	DPP10	S556	M161	L98	0.85	0.773	0.508	46.752	57.934
151871	DPPA2	S240	M93	L1	0.632	0.356	0.663	-10.857	-73.758
84661	DPY30	S305	M105	L77	1	1	0.96	49.045	-54.173
1810	DR1	S16	M4	L6	0.415	1	1	87.389	-4.64
128338	DRAM2	S176	M168	L4	0.975	0.705	0.906	53.018	15.128
10589	DRAP1	S33	M23	L3	1	0.995	0.923	-17.642	21.056
1812	DRD1	S140	M75	L3	1	0.975	0.5	34.449	60.113
29102	DROSHA	S179	M14	L11	0.865	0.919	0.648	67.302	-20.361
1823	DSC1	S395	M282	L3	1	0.87	0.629	1.638	51.591
1825	DSC3	S710	M459	L5	0.677	0.457	0.423	-8.213	18.217
79980	DSN1	S57	M54	L1	1	0.865	0.88	-50.383	-53.248
1834	DSPP	S506	M68	L5	0.56	0.936	0.963	-47.633	49.238
51514	DTL	S196	M73	L50	0.96	0.955	0.26	20.452	21.304
1840	DTX1	S363	M324	L5	0.995	0.64	0.963	-48.827	36.609
196403	DTX3	S342	M263	L159	1	0.96	0.518	-37.916	15.857
1841	DTYMK	S1	M8	L8	0.715	1	1	71.539	-58.77
50506	DUOX2	S60	M21	L3	0.953	0.985	0.918	-14.354	35.192
11072	DUSP14	S405	M75	L3	0.965	0.854	0.479	35.022	53.87
1846	DUSP4	S188	M166	L103	1	0.955	0.57	-8.436	-13.966
1848	DUSP6	S711	M5	L5	0	0.916	0.995	-32.534	39.702
1854	DUT	S129	M126	L2	0.973	0.77	0.934	-42.099	2.084
1778	DYNC1H1	S124	M10	L2	0.965	0.659	0.99	-55.009	2.973
1781	DYNC1I2	S272	M7	L4	0.955	0.55	0.96	61.151	14.055
51143	DYNC1LI1	S11	M4	L6	0.864	1	1	93.59	-7.74
1783	DYNC1LI2	S241	M9	L1	0.785	0.514	1	-39.151	-82.647
79659	DYNC2H1	S20	M5	L5	0.955	0.695	0.995	-33.756	53.124
51626	DYNC2LI1	S162	M2	L1	0.573	0.965	1	-60.37	-83.354
83658	DYNLRB1	S543	M365	L1	0.755	0.432	0.729	-58.388	-75.95
8798	DYRK4	S712	M43	L23	0	0.97	0.695	-12.585	-17.025
1871	E2F3	S170	M120	L69	0.76	0.93	0.201	15.831	54.083
1875	E2F5	S23	M22	L16	0.485	0.755	0.935	-17.984	72.29
124454	EARS2	S118	M39	L3	0.97	0.715	0.52	21.873	63.928
10148	EBI3	S20	M5	L5	0.959	0.695	0.995	-29.031	53.323
10969	EBNA1BP2	S434	M10	L2	0.725	0.969	0.99	-50.907	-2.132
11319	ECD	S125	M4	L6	0.607	1	1	99.651	-1.244
1632	ECI1	S62	M50	L3	0.761	0.677	0.764	-6.139	50.902
51295	ECSIT	S13	M17	L2	0.97	0.945	0.989	-58.252	-23.627
1894	ECT2	S51	M62	L26	1	1	0.915	35.003	79.921
128178	EDARADD	S443	M39	L3	0.405	0.259	0.53	17.525	66.291
23644	EDC4	S128	M11	L4	0.42	0.724	0.96	47.009	-8.706
8721	EDF1	S632	M359	L200	1	1	0.975	-12.273	-9.611
10085	EDIL3	S15	M4	L6	0.91	0.99	1	98.732	-7.224
1909	EDNRA	S150	M146	L91	1	1	0.97	48.647	77.958
1915	EEF1A1	S2	M6	L7	0.995	1	0.995	72.124	65.027
1937	EEF1G	S2	M6	L7	0.995	1	0.995	71.489	65.129
1938	EEF2	S27	M34	L10	1	1	0.815	5.077	-12.742
151651	EFHB	S616	M66	L22	1	0.73	0.86	37.025	-24.193
80303	EFHD1	S130	M1	L2	0.735	0.97	0.99	-84.844	26.109
1947	EFNB1	S137	M25	L3	0.98	0.834	0.894	-12.747	6.719
1949	EFNB3	S479	M269	L16	0.51	0.605	0.935	-18.949	73.879
9343	EFTUD2	S121	M10	L2	0.865	0.888	0.99	-55.33	-8.587
1956	EGFR	S45	M40	L25	1	1	0.825	23.915	24.592
54583	EGLN1	S296	M243	L4	0.985	0.865	0.93	44.938	12.205
112398	EGLN2	S325	M73	L50	0.505	0.923	0.286	18.641	17.557
112399	EGLN3	S36	M44	L12	0.795	0.795	0.795	18.725	-0.449
30845	EHD3	S263	M241	L130	1	1	0.995	25.663	-32.737
26298	EHF	S37	M24	L3	1	1	0.533	-0.363	64.608
79813	EHMT1	S339	M204	L3	0.85	0.555	0.665	-11.573	60.941
10919	EHMT2	S339	M204	L3	0.89	0.57	0.692	-12.032	61.093
84285	EIF1AD	S1	M8	L8	1	1	1	75.491	-55.912
83939	EIF2A	S513	M2	L1	0.613	0.592	1	-30.746	-87.081
9451	EIF2AK3	S126	M123	L80	1	1	0.76	12.991	22.601
440275	EIF2AK4	S181	M160	L97	1	1	1	103.632	31.748
1967	EIF2B1	S124	M10	L2	0.925	0.659	0.99	-53.844	1.959
8892	EIF2B2	S113	M58	L2	0.995	0.898	0.922	-38.435	-3.137
8891	EIF2B3	S365	M14	L11	0.975	0.759	0.648	68.146	-24.221
8890	EIF2B4	S113	M58	L2	0.946	0.79	0.959	-40.207	-3.181
8893	EIF2B5	S113	M58	L2	0.935	0.78	0.964	-40.213	-3.16
1965	EIF2S1	S19	M18	L1	0.99	0.88	0.99	-45.535	-55.883
8894	EIF2S2	S110	M112	L66	1	1	0.665	-26.087	1.175
1968	EIF2S3	S409	M198	L1	0.91	0.597	0.974	-49.298	-62.53
8661	EIF3A	S337	M26	L3	0.855	0.887	0.392	22.873	36.206
8662	EIF3B	S5	M7	L4	1	1	0.96	44.737	21.032
8664	EIF3D	S7	M2	L1	1	0.985	1	-49.931	-76.592
3646	EIF3E	S385	M58	L2	0.975	0.656	0.731	-39.03	-7.804
8665	EIF3F	S115	M28	L2	0.92	0.794	0.99	-58.849	11.692
8666	EIF3G	S399	M298	L166	1	0.945	0.426	3.57	56.766
8667	EIF3H	S28	M26	L3	0.995	0.995	0.41	19.982	38.53
8668	EIF3I	S449	M279	L57	1	0.89	0.25	6.887	55.081
8669	EIF3J	S468	M99	L2	0.53	0.646	0.985	-70.264	-7.701
10480	EIF3M	S321	M220	L1	0.758	0.722	1	-45.684	-52.907
1973	EIF4A1	S312	M256	L129	1	1	0.965	42.367	-21.147
1974	EIF4A2	S56	M64	L44	1	1	0.77	17.089	-28.569
9775	EIF4A3	S161	M132	L85	1	1	0.98	-28.026	91.743
1975	EIF4B	S23	M22	L16	0.99	0.99	0.935	-22.412	70.642
1977	EIF4E	S312	M256	L129	1	1	0.965	42.305	-20.734
317649	EIF4E3	S330	M213	L1	0.53	0.536	0.754	-49.428	-83.107
8637	EIF4EBP3	S42	M53	L3	0.809	0.98	0.415	46.508	49.645
1981	EIF4G1	S312	M256	L129	1	1	0.965	42.271	-20.615
1982	EIF4G2	S141	M59	L18	0.995	0.99	0.486	53.861	-35.534
1983	EIF5	S1	M8	L8	1	1	1	75.108	-54.012
1984	EIF5A	S102	M103	L65	1	0.97	0.6	26.102	86.824
143244	EIF5AL1	S32	M19	L3	1	0.965	0.96	4.503	30.292
9669	EIF5B	S487	M303	L115	0.98	0.98	0.87	-73.813	53.942
3692	EIF6	S106	M10	L2	0.94	0.691	0.99	-49.389	1.019
7260	EIPR1	S20	M5	L5	0.84	0.695	0.995	-33.919	56.639
60528	ELAC2	S49	M63	L10	0.993	0.849	0.65	7.251	-5.297
1994	ELAVL1	S108	M111	L36	1	0.91	0.445	65.368	11.535
8178	ELL	S49	M63	L10	1	0.81	0.774	8.711	-8.924
22936	ELL2	S326	M150	L5	1	0.675	0.98	-42.22	59.74
80237	ELL3	S169	M52	L38	1	1	0.87	44.929	68.809
6923	ELOB	S361	M290	L4	1	0.865	0.954	43.006	-7.686
84337	ELOF1	S3	M3	L1	0.995	0.995	0.905	-17.587	-53.382
54898	ELOVL2	S158	M133	L3	0.98	0.82	0.462	19.59	77.188
55250	ELP2	S17	M14	L11	0.99	0.925	0.65	63.249	-13.993
55140	ELP3	S54	M30	L3	1	0.96	0.697	-6.212	59.91
26610	ELP4	S439	M302	L2	0.682	0.332	0.94	-75.429	-4.42
23587	ELP5	S1	M8	L8	0.979	1	1	75.608	-48.951
54859	ELP6	S1	M8	L8	0.979	1	1	75.26	-48.56
23065	EMC1	S15	M4	L6	0.75	0.99	1	97.435	-2.333
55831	EMC3	S1	M8	L8	0.979	1	1	78.135	-48.345
51234	EMC4	S164	M3	L1	0.647	0.978	0.854	-28.3	-93.232
129080	EMID1	S198	M81	L4	0.919	0.935	0.992	41.647	8.614
90187	EMILIN3	S514	M357	L179	0.895	0.541	0.485	-12.275	-47.055
27436	EML4	S640	M411	L192	0.6	0.665	0.745	69.61	0.103
8507	ENC1	S67	M43	L23	0.995	1	0.695	-16.104	-18.43
2021	ENDOG	S183	M106	L5	0.51	0.464	0.995	-38.362	34.238
284131	ENDOV	S38	M31	L3	0.43	0.69	0.886	-0.664	18.898
2023	ENO1	S8	M5	L5	0.829	1	0.995	-39.984	46.449
58478	ENOPH1	S192	M179	L2	0.76	0.49	0.968	-52.824	16.014
2028	ENPEP	S293	M37	L10	0.975	0.899	0.651	-15.337	-3.761
2029	ENSA	S33	M23	L3	1	0.995	0.923	-16.126	20.656
955	ENTPD6	S293	M37	L10	0.975	0.899	0.651	-15.494	-3.714
56943	ENY2	S129	M126	L2	0.94	0.755	0.985	-44.344	2.756
2033	EP300	S293	M37	L10	0.975	0.899	0.651	-14.224	-4.186
57634	EP400	S357	M270	L139	1	1	0.824	11.205	-25.438
64097	EPB41L4A	S408	M340	L3	1	0.985	0.36	28.536	76.459
2038	EPB42	S241	M9	L1	0.716	0.516	1	-38.212	-80.58
26122	EPC2	S4	M1	L2	1	1	1	-76.189	16.373
2046	EPHA8	S154	M87	L4	0.995	0.9	0.957	56.886	16.775
2050	EPHB4	S474	M167	L3	0.66	0.264	0.53	16.486	69.94
7957	EPM2A	S200	M180	L29	0.98	0.545	0.719	-9.787	43.537
22905	EPN2	S402	M40	L25	0.903	0.875	0.735	29.137	20.565
2058	EPRS	S95	M4	L6	0.675	0.934	1	83.263	-9.43
2060	EPS15	S521	M50	L3	0.665	0.697	0.718	-10.189	76.441
54869	EPS8L1	S30	M36	L2	0.978	0.725	0.99	-51.127	13.617
2064	ERBB2	S512	M356	L4	0.99	0.81	0.267	17.502	47.427
2065	ERBB3	S632	M359	L200	1	1	0.975	-12.273	-9.599
2068	ERCC2	S11	M4	L6	0.94	0.965	0.965	90.111	-14.654
54821	ERCC6L	S713	M460	L115	0	0	0.513	-58.52	42.645
2069	EREG	S54	M30	L3	1	0.96	0.697	-6.896	58.687
2079	ERH	S113	M58	L2	0.995	0.898	0.922	-37.87	-3.12
114625	ERMAP	S6	M11	L4	0.667	0.742	0.96	56.306	-4.759
79956	ERMP1	S3	M3	L1	0.766	0.95	0.905	-21.31	-52.691
2081	ERN1	S158	M133	L3	0.871	0.796	0.469	17.615	79.073
10595	ERN2	S72	M21	L3	0.95	0.77	0.847	-8.102	83.75
405754	ERVFRD-1	S23	M22	L16	0.485	0.755	0.935	-18.549	72.693
2098	ESD	S76	M10	L2	0.438	0.964	0.985	-49.584	-5.46
51575	ESF1	S628	M402	L8	0.72	0.615	0.99	71.477	-52.076
11082	ESM1	S258	M99	L2	0.99	0.635	0.995	-73.862	-9.514
9700	ESPL1	S11	M4	L6	0.297	1	1	87.71	-6.869
2099	ESR1	S102	M103	L65	1	0.97	0.6	24.74	86.514
2104	ESRRG	S479	M269	L16	0.57	0.628	0.929	-18.275	76.126
2107	ETF1	S122	M94	L67	1	1	0.64	-60.643	-53.302
2108	ETFA	S438	M334	L6	0.995	0.97	0.994	86.806	-15.403
2109	ETFB	S63	M25	L3	0.915	0.915	0.829	-4.147	10.132
55500	ETNK1	S261	M55	L2	0.96	0.969	0.5	-79.469	41.845
2113	ETS1	S571	M395	L2	0.945	0.53	0.964	-42.845	7.359
2130	EWSR1	S104	M23	L3	0.89	0.879	0.892	-16.293	44.505
51013	EXOSC1	S21	M10	L2	1	0.995	0.99	-54.698	-2.906
5394	EXOSC10	S15	M4	L6	0.91	0.99	1	97.381	-10.274
23404	EXOSC2	S16	M4	L6	0.555	1	1	88.694	-1.765
54512	EXOSC4	S125	M4	L6	0.607	1	1	99.492	-0.734
56915	EXOSC5	S112	M10	L2	0.883	0.867	0.99	-47.424	-1.766
118460	EXOSC6	S1	M8	L8	0.584	0.929	1	82.829	-49.007
23016	EXOSC7	S95	M4	L6	0.675	0.934	1	81.538	-10.002
11340	EXOSC8	S95	M4	L6	0.675	0.934	1	81.956	-8.994
5393	EXOSC9	S152	M55	L2	1	0.935	0.615	-76.484	40.11
50848	F11R	S213	M196	L3	0.995	0.905	0.751	2.583	37.638
2147	F2	S147	M1	L2	0.655	0.759	1	-82.345	-9.671
646486	FABP12	S2	M6	L7	0.843	1	0.995	61.914	70.161
2171	FABP5	S200	M180	L29	0.98	0.545	0.719	-9.761	43.604
79607	FAM118B	S26	M2	L1	0.943	0.952	1	-55.496	-79.449
84668	FAM126A	S7	M2	L1	0.545	0.985	1	-51.343	-80.531
26355	FAM162A	S331	M2	L1	0.975	0.966	1	-50.256	-86.794
284069	FAM171A2	S3	M3	L1	0.985	0.995	0.905	-23.289	-51.625
165215	FAM171B	S165	M136	L90	1	1	0.93	-45.777	17.91
134145	ATPSCKMT	S2	M6	L7	1	1	0.995	64.073	67.12
51252	FAM178B	S3	M3	L1	0.805	0.995	0.905	-25.919	-46.112
389558	FAM180A	S3	M3	L1	0.995	0.995	0.905	-18.973	-55.205
84070	FAM186B	S5	M7	L4	0.937	1	0.96	45.297	23.669
221786	FAM200A	S2	M6	L7	1	1	0.995	65.346	65.507
285550	FAM200B	S155	M3	L1	0.38	0.935	0.905	-20.269	-45.531
54942	ABITRAM	S138	M2	L1	0.99	0.977	0.98	-44.799	-86.776
29902	FAM216A	S71	M47	L2	0.99	0.95	0.937	-69.62	0.357
26017	FAM32A	S166	M139	L9	1	1	0.345	71.462	50.187
54097	FAM3B	S162	M2	L1	0.605	0.965	1	-58.931	-81.769
131177	FAM3D	S432	M172	L1	1	0.74	0.897	-24.289	-41.38
9130	FAM50A	S189	M156	L3	1	0.84	0.389	27.815	60.632
375061	FAM89A	S278	M231	L1	0.99	0.955	0.885	-22.453	-66.485
171484	FAM9C	S53	M9	L1	0.96	0.531	1	-36.438	-87.414
57697	FANCM	S356	M275	L138	1	0.975	0.775	4.152	0.986
10667	FARS2	S35	M1	L2	0.622	0.969	1	-72.21	17.651
10056	FARSB	S15	M4	L6	0.915	0.99	1	96.306	-9.815
356	FASLG	S317	M258	L3	0.995	0.625	0.518	18.81	62.429
2194	FASN	S426	M323	L156	1	1	0.995	76.657	-30.301
10922	FASTK	S453	M341	L152	0.995	0.83	0.43	58.315	81.622
22868	FASTKD2	S97	M57	L1	0.49	0.692	0.95	-23.249	-77.378
2197	FAU	S17	M14	L11	0.989	0.925	0.65	58.014	-15.348
2091	FBL	S390	M3	L1	0.63	0.955	0.905	-17.871	-59.952
2199	FBLN2	S152	M55	L2	0.791	0.735	0.697	-73.982	40.87
57666	FBRSL1	S448	M3	L1	0.99	0.976	0.899	-34.135	-50.077
26267	FBXO10	S2	M6	L7	0.995	1	0.995	67.195	72.118
80204	FBXO11	S516	M71	L14	0.595	0.542	0.778	8.927	91.623
115290	FBXO17	S48	M27	L14	0.663	0.939	0.556	13.355	47.882
26260	FBXO25	S132	M127	L2	0.96	0.695	1	-94.425	-6.817
114907	FBXO32	S107	M116	L4	0.61	0.535	0.96	49.377	12.571
26271	FBXO5	S45	M40	L25	1	1	0.825	25.413	23.77
23291	FBXW11	S145	M145	L32	1	1	0.8	29.52	1.391
6468	FBXW4	S472	M267	L3	0.945	0.86	0.706	-1.248	8.574
83953	FCAMR	S206	M46	L3	0.995	0.844	0.652	11.887	36.487
79368	FCRL2	S58	M1	L2	0.745	0.974	1	-83.325	3.709
115352	FCRL3	S668	M1	L2	0.55	0.917	0.955	-80.936	22.706
2224	FDPS	S714	M461	L55	0.49	0.34	0.59	-4.609	-61.084
2241	FER	S233	M182	L3	1	0.63	0.789	7.757	33.779
55612	FERMT1	S29	M33	L17	1	1	0.96	5.555	-40.955
10979	FERMT2	S39	M13	L9	0.575	1	0.945	80.948	33.299
2864	FFAR1	S552	M389	L198	1	0.995	0.93	87.343	-21.182
2245	FGD1	S12	M13	L9	0.58	1	0.945	83.003	37.139
89846	FGD3	S715	M6	L7	0.51	0.505	0.77	56.452	66.954
8074	FGF23	S10	M1	L2	0.949	0.769	1	-80.458	-4.354
9982	FGFBP1	S450	M313	L1	0.66	0.56	0.995	-52.561	-68.797
2260	FGFR1	S617	M441	L5	0.815	0.73	0.311	27.58	37.684
81608	FIP1L1	S6	M11	L4	0.713	0.758	0.96	53.502	-7.622
2280	FKBP1A	S149	M49	L3	0.925	0.54	0.658	-24.811	14.59
2281	FKBP1B	S5	M7	L4	1	1	0.96	44.376	19.335
2288	FKBP4	S55	M37	L10	1	0.995	0.678	-7.713	-2.875
23770	FKBP8	S51	M62	L26	1	1	0.915	37.523	79.118
79147	FKRP	S469	M328	L4	0.985	0.91	0.764	40.591	1.637
201163	FLCN	S45	M40	L25	1	1	0.825	23.376	24.891
2313	FLI1	S338	M239	L136	1	0.975	0.51	-48.789	22.513
2314	FLII	S5	M7	L4	1	1	0.96	47.872	21.399
2324	FLT4	S535	M432	L182	1	1	0.805	24.432	41.732
28982	FLVCR1	S595	M159	L96	0.965	0.994	0.963	-20.056	-28.853
79672	FN3KRP	S493	M353	L14	0.859	0.859	0.445	2.093	86.947
23360	FNBP4	S716	M8	L8	0	0.383	0.497	83.719	-47.465
2339	FNTA	S8	M5	L5	0.912	1	0.995	-38.037	52.269
54914	FOCAD	S160	M1	L2	0.825	0.756	1	-89.985	-10.18
2353	FOS	S47	M29	L3	0.794	0.965	0.81	-0.696	45.211
8061	FOSL1	S182	M162	L101	1	1	0.835	29.872	35.78
3169	FOXA1	S198	M81	L4	0.955	0.881	0.947	39.226	8.321
3171	FOXA3	S259	M130	L3	0.965	0.895	0.234	-9.508	66.58
2303	FOXC2	S456	M69	L34	0.925	0.687	0.475	37.54	33.752
653427	FOXD4L5	S82	M90	L20	1	0.995	0.775	14.978	-51.23
2304	FOXE1	S32	M19	L3	0.774	0.985	0.965	-2.683	28.402
55810	FOXJ2	S623	M373	L3	0.98	0.725	0.425	-11.192	55.697
22887	FOXJ3	S499	M358	L3	0.335	0.341	0.399	25.302	58.022
3607	FOXK2	S717	M462	L5	0	0	0.5	-15.094	37.1
2305	FOXM1	S90	M96	L48	1	0.995	0.725	67.046	31.246
8456	FOXN1	S64	M19	L3	0.949	0.71	0.965	-7.749	25.438
1112	FOXN3	S38	M31	L3	0.995	0.995	0.947	0.632	23.362
93986	FOXP2	S27	M34	L10	1	1	0.815	4.759	-9.894
2356	FPGS	S538	M370	L177	1	1	1	109.578	-9.589
2358	FPR2	S194	M175	L3	1	0.915	0.646	-19.056	3.957
10818	FRS2	S617	M441	L5	0.815	0.73	0.508	-31.228	56.546
84075	FSCB	S7	M2	L1	0.98	0.98	1	-46.522	-76.731
2492	FSHR	S92	M118	L52	1	1	0.48	-25.969	7.846
10468	FST	S148	M143	L56	0.995	0.925	0.925	40.447	39.824
23105	FSTL4	S121	M10	L2	0.865	0.888	0.99	-57.125	-7.679
117246	FTSJ3	S6	M11	L4	0.991	0.755	0.96	55.391	1.441
8880	FUBP1	S100	M38	L24	1	0.995	0.65	13.76	12.557
8939	FUBP3	S265	M225	L131	1	1	0.865	-43.595	70.246
197258	FCSK	S189	M156	L3	1	0.84	0.389	28.72	60.086
2521	FUS	S89	M83	L37	0.995	0.96	0.851	20.108	-37.177
10690	FUT9	S117	M60	L2	0.718	0.495	0.975	-77.942	26.838
2395	FXN	S184	M164	L99	0.725	0.745	0.54	75.393	-22.123
53828	FXYD4	S577	M421	L61	0.995	0.95	0.525	-86.766	47.106
2534	FYN	S341	M20	L3	0.554	0.636	0.53	17.678	72.223
8321	FZD1	S92	M118	L52	1	1	0.48	-25.88	7.742
11211	FZD10	S282	M86	L62	0.99	0.995	0.85	31.785	11.398
8322	FZD4	S202	M183	L3	0.99	0.695	0.934	-2.331	35.771
51343	FZR1	S47	M29	L3	0.794	0.965	0.81	-1.851	45.149
50486	G0S2	S409	M198	L1	0.91	0.597	0.974	-49.821	-62.067
2549	GAB1	S146	M71	L14	1	0.925	0.797	6.371	93.194
2553	GABPB1	S32	M19	L3	0.93	0.899	0.92	4.386	31.658
2555	GABRA2	S84	M92	L60	1	1	0.97	-62.591	48.683
2580	GAK	S88	M66	L22	1	1	0.865	35.091	-22.435
2584	GALK1	S335	M218	L3	1	0.965	0.821	-17.597	11.623
2585	GALK2	S200	M180	L29	0.955	0.515	0.739	-12.117	41.842
2597	GAPDH	S221	M177	L111	1	0.995	0.48	34.078	-60.093
54433	GAR1	S237	M9	L1	0.595	0.543	1	-28.22	-79.778
2617	GARS	S15	M4	L6	0.915	0.99	1	94.87	-10.199
2618	GART	S29	M33	L17	0.894	0.99	0.95	9.014	-42.758
10634	GAS2L1	S7	M2	L1	1	0.946	1	-56.824	-72.968
2625	GATA3	S222	M192	L70	1	0.96	0.56	72.583	54.47
8729	GBF1	S121	M10	L2	0.851	0.888	0.959	-54.342	-11.958
2729	GCLC	S62	M50	L3	0.868	0.733	0.758	-6.181	51.855
10985	GCN1	S181	M160	L97	1	1	1	103.207	31.081
2651	GCNT2	S718	M28	L2	0	0.565	1	-63.695	14.514
2668	GDNF	S360	M273	L142	1	1	0.91	-32.67	11.591
8487	GEMIN2	S195	M152	L4	0.816	0.325	0.965	45.206	5.134
50628	GEMIN4	S37	M24	L3	1	1	0.533	-2.033	65.164
25929	GEMIN5	S492	M347	L32	0.976	0.69	0.31	27.804	-1.664
85476	GFM1	S31	M12	L1	0.99	0.98	0.994	-10.135	-86.109
23062	GGA2	S37	M24	L3	1	1	0.533	1.883	65.472
23163	GGA3	S719	M463	L14	0.909	0.764	0.342	0.642	82.431
2677	GGCX	S673	M371	L6	0.99	0.515	1	101.175	-5.162
9453	GGPS1	S4	M1	L2	0.946	0.972	1	-88.682	24.372
2692	GHRHR	S658	M388	L2	0.8	0.735	1	-79.525	15.065
9837	GINS1	S144	M138	L13	1	0.945	1	56.731	-68.117
51659	GINS2	S144	M138	L13	1	0.945	1	56.433	-69.494
64785	GINS3	S225	M108	L72	1	1	1	-42.936	-26.203
84296	GINS4	S144	M138	L13	1	0.945	1	56.569	-68.8
10755	GIPC1	S261	M55	L2	0.96	0.969	0.5	-79.695	42.448
2696	GIPR	S10	M1	L2	0.989	0.724	1	-88.07	-6.18
349149	GJC3	S101	M20	L3	0.975	0.981	0.538	28.48	70.272
56287	GKN1	S230	M186	L4	1	0.98	0.952	62.146	-0.855
89944	GLB1L2	S91	M3	L1	0.645	0.96	0.905	-17.255	-46.57
26035	GLCE	S177	M193	L94	1	1	0.65	72.815	8.655
2733	GLE1	S364	M342	L6	0.66	0.495	0.994	95.05	-15.115
256710	GLIPR1L1	S10	M1	L2	0.894	0.784	1	-83.05	-5.689
144321	GLIPR1L2	S53	M9	L1	0.685	0.453	0.955	-39.686	-87.856
51031	GLOD4	S440	M9	L1	0.62	0.525	0.633	-37.148	-73.399
9340	GLP2R	S243	M205	L61	0.99	0.87	0.495	-84.111	41.87
8001	GLRA3	S32	M19	L3	0.832	0.98	0.96	1.065	29.382
2744	GLS	S720	M464	L3	0.7	0.62	0.187	11.14	-34.78
2752	GLUL	S314	M257	L3	1	0.855	0.535	11.347	63.507
389396	GLYATL3	S3	M3	L1	0.882	0.995	0.905	-25.373	-48.293
84656	GLYR1	S380	M24	L3	0.635	1	0.533	0.667	68.122
51053	GMNN	S45	M40	L25	1	1	0.825	24.822	22.982
2770	GNAI1	S467	M268	L87	1	0.995	0.604	81.488	57.974
2773	GNAI3	S64	M19	L3	0.949	0.71	0.965	-7.865	25.13
2778	GNAS	S69	M41	L10	0.66	0.745	0.815	-0.746	-9.438
2782	GNB1	S605	M372	L9	1	0.985	0.944	91.857	37.112
2783	GNB2	S39	M13	L9	0.558	1	0.945	82.806	30.699
2784	GNB3	S590	M171	L104	0.995	0.954	0.805	19.912	94.368
10681	GNB5	S8	M5	L5	0.669	1	0.995	-36.494	47.328
10020	GNE	S585	M206	L63	0.595	0.784	0.415	17.395	33.009
2788	GNG7	S301	M27	L14	0.89	0.61	0.725	8.204	44.437
29889	GNL2	S179	M14	L11	0.865	0.919	0.648	66.761	-21.152
26354	GNL3	S268	M14	L11	0.65	0.909	0.65	64.079	-11.441
54552	GNL3L	S2	M6	L7	1	1	0.995	68.332	70.925
10578	GNLY	S721	M23	L3	0.534	0.682	0.701	-21.692	19.801
27232	GNMT	S722	M42	L27	0	0.66	0.607	31.035	50.218
132789	GNPDA2	S586	M1	L2	0.605	0.764	1	-81.279	-11.203
2797	GNRH2	S2	M6	L7	0.995	1	0.995	63.152	67.069
2798	GNRHR	S295	M46	L3	0.565	0.925	0.669	8.925	76.6
55889	GOLGA6B	S53	M9	L1	0.96	0.531	1	-37.914	-87.381
55204	GOLPH3L	S109	M2	L1	0.975	0.522	1	-42.927	-74.051
2806	GOT2	S99	M104	L64	0.52	0.98	0.824	-18.333	62.112
57678	GPAM	S672	M1	L2	0.775	0.818	0.974	-73.145	24.902
2719	GPC3	S659	M29	L3	0.935	0.578	0.765	-3.213	42.495
2823	GPM6A	S162	M2	L1	0.545	0.929	1	-58.274	-81.363
11321	GPN1	S11	M4	L6	0.995	1	1	89.178	-8.88
54707	GPN2	S1	M8	L8	0.979	1	1	76.009	-52.955
51184	GPN3	S563	M384	L10	1	0.99	0.43	27.165	-4.937
56927	GPR108	S390	M3	L1	0.61	0.955	0.905	-17.284	-58.161
387509	GPR153	S474	M167	L3	0.655	0.25	0.535	15.701	69.659
80045	GPR157	S662	M366	L2	0.975	0.875	1	-75.495	0.265
27239	GPR162	S77	M5	L5	0.985	0.941	0.995	-30.38	37.682
2840	GPR17	S104	M23	L3	0.89	0.879	0.892	-16.583	43.938
11318	GPR182	S565	M39	L3	0.6	0.79	0.52	14.723	66.599
1880	GPR183	S332	M248	L118	0.955	0.965	0.885	6.949	-29.681
2857	GPR34	S140	M75	L3	1	1	0.503	33.566	57.951
2830	GPR6	S612	M215	L2	0.417	0.6	0.819	-40.768	11.338
8111	GPR68	S429	M327	L3	0.985	0.515	0.528	4.557	72.146
53831	GPR84	S150	M146	L91	1	1	0.97	49.708	79.033
222545	GPRC6A	S119	M119	L10	1	0.875	0.277	-4.541	0.484
2873	GPS1	S34	M35	L4	0.995	0.631	0.951	67.676	20.144
2879	GPX4	S219	M84	L12	0.99	0.73	0.995	29.393	-31.927
2885	GRB2	S146	M71	L14	1	0.925	0.797	6.227	91.789
2886	GRB7	S402	M40	L25	0.96	1	0.805	27.139	21.657
26585	GREM1	S4	M1	L2	0.956	0.988	0.985	-77.84	19.81
116443	GRIN3A	S641	M87	L4	0.725	0.873	0.957	55.542	21.181
156	GRK2	S48	M27	L14	0.663	0.939	0.556	12.798	47.677
157	GRK3	S83	M91	L3	0.955	0.505	0.538	10.843	70.657
2868	GRK4	S2	M6	L7	1	1	0.995	63.766	72.147
131890	GRK7	S74	M5	L5	0.85	0.975	0.99	-29.374	46.196
2913	GRM3	S515	M407	L3	0.94	0.57	0.515	14.238	61.828
2914	GRM4	S444	M107	L11	0.97	0.735	0.66	61.923	-25.759
80273	GRPEL1	S367	M57	L1	0.935	0.665	1	-21.546	-78.629
2926	GRSF1	S363	M324	L5	0.995	0.64	0.963	-49.527	36.647
2935	GSPT1	S6	M11	L4	0.991	0.755	0.96	57.342	3.787
2954	GSTZ1	S202	M183	L3	1	0.695	0.934	-3.914	34.799
11036	GTF2A1L	S35	M1	L2	0.71	0.985	1	-66.191	18.12
2958	GTF2A2	S24	M4	L6	0.58	1	1	94.586	-0.302
2959	GTF2B	S280	M85	L42	0.68	0.887	0.88	27.788	-52.621
2961	GTF2E2	S49	M63	L10	1	0.81	0.774	7.321	-8.701
2962	GTF2F1	S49	M63	L10	1	0.81	0.774	7.827	-8.594
2965	GTF2H1	S349	M311	L26	1	0.94	0.571	41.888	78.331
2966	GTF2H2	S136	M125	L82	0.955	0.784	0.606	50.782	61.767
2968	GTF2H4	S670	M346	L203	1	1	0.995	50.553	95.472
2971	GTF3A	S38	M31	L3	1	0.995	0.947	2.86	19.572
2975	GTF3C1	S592	M445	L181	1	1	0.95	-3.118	-36.032
2976	GTF3C2	S723	M27	L14	0	0.721	0.577	6.652	52.504
9330	GTF3C3	S592	M445	L181	1	1	0.95	-3.117	-36.027
112495	GTF3C6	S530	M3	L1	0.905	0.769	0.905	-31.133	-50.841
9567	GTPBP1	S8	M5	L5	0.534	1	0.995	-37.135	43.093
23560	GTPBP4	S95	M4	L6	0.665	0.909	0.975	80.487	-8.85
51512	GTSE1	S88	M66	L22	1	1	0.865	35.539	-21.788
2984	GUCY2C	S724	M20	L3	0.408	0.615	0.348	26.188	72.9
3000	GUCY2D	S87	M1	L2	0.683	0.809	0.979	-69.366	23.861
2986	GUCY2F	S83	M91	L3	0.955	0.505	0.538	11.235	70.27
2987	GUK1	S725	M465	L5	0.45	0.478	0.443	-23.557	-4.8
2997	GYS1	S156	M124	L31	0.6	0.71	0.877	-0.32	95.893
3001	GZMA	S406	M300	L2	1	0.905	0.994	-61.459	24.649
3002	GZMB	S34	M35	L4	0.444	0.47	0.955	63.145	19.986
3005	H1F0	S647	M386	L194	1	1	1	-44.883	29.483
94239	H2AFV	S22	M1	L2	0.847	0.975	1	-73.49	9.762
23498	HAAO	S285	M234	L133	1	1	0.745	-53.211	51.221
201562	HACD2	S3	M3	L1	0.995	0.995	0.905	-20.541	-55.137
401494	HACD4	S10	M1	L2	0.642	0.764	1	-87.384	-0.922
3033	HADH	S216	M78	L49	1	1	0.865	-67.183	39.623
3030	HADHA	S458	M335	L3	1	0.985	0.371	40.482	61.562
3034	HAL	S362	M274	L144	1	1	0.92	4.442	104.141
23438	HARS2	S13	M17	L2	1	0.945	0.994	-61.115	-19.24
3037	HAS2	S681	M130	L3	0.86	0.85	0.228	-7.335	69.253
115106	HAUS1	S726	M288	L126	0.74	0.556	0.56	-49.139	44.127
55142	HAUS2	S25	M2	L1	0.979	0.718	1	-36.707	-67.728
79441	HAUS3	S25	M2	L1	0.979	0.718	1	-36.031	-67.46
54801	HAUS6	S25	M2	L1	0.979	0.718	1	-35.474	-67.343
10767	HBS1L	S5	M7	L4	0.505	0.935	0.96	45.414	18.209
3052	HCCS	S13	M17	L2	1	0.945	0.994	-59.572	-20.335
3054	HCFC1	S206	M46	L3	1	0.844	0.652	12.222	34.806
3061	HCRTR1	S527	M20	L3	0.68	0.96	0.53	24.333	75.55
83933	HDAC10	S727	M466	L9	0	0.595	0.226	24.18	47.625
79885	HDAC11	S556	M161	L98	0.85	0.773	0.508	46.445	58.298
8841	HDAC3	S201	M181	L114	1	1	0.58	31.7	94.387
9759	HDAC4	S32	M19	L3	0.779	0.985	0.965	-1.182	28.864
55869	HDAC8	S132	M127	L2	0.96	0.695	1	-94.499	-8.441
154150	HDGFL1	S641	M87	L4	0.725	0.873	0.957	55.622	20.866
139324	HDX	S21	M10	L2	0.371	0.928	0.99	-58.19	-5.335
55127	HEATR1	S19	M18	L1	0.918	0.89	1	-44.023	-60.372
55027	HEATR3	S109	M2	L1	0.359	0.523	1	-38.743	-74.957
256957	HEATR9	S73	M82	L1	0.975	0.91	0.995	-17.127	-81.236
50865	HEBP1	S97	M57	L1	1	0.451	0.95	-26.239	-75.76
25831	HECTD1	S185	M165	L102	1	1	0.995	27.629	-96.57
79654	HECTD3	S682	M7	L4	0.9	0.833	0.96	50.937	25.256
57520	HECW2	S430	M202	L110	0.954	0.972	0.68	43.975	36.691
51191	HERC5	S203	M201	L57	0.995	0.98	0.405	50.041	47.091
390992	HES3	S194	M175	L3	0.745	0.905	0.646	-18.055	5.616
84667	HES7	S519	M6	L7	0.73	0.953	0.995	54.63	68.252
124790	HEXIM2	S155	M3	L1	0.45	0.97	0.905	-20.488	-46.795
23493	HEY2	S64	M19	L3	0.939	0.71	0.965	-4.391	26.073
9146	HGS	S76	M10	L2	0.85	0.958	0.985	-49.233	-7.707
192286	HIGD2A	S2	M6	L7	1	1	0.995	64.983	66.215
51501	HIKESHI	S375	M2	L1	0.41	0.486	1	-40.576	-78.797
135114	HINT3	S310	M253	L128	1	1	0.95	-99.509	31.734
3092	HIP1	S199	M21	L3	0.57	0.963	0.918	-11.303	33.593
204851	HIPK1	S515	M407	L3	0.94	0.57	0.515	14.171	61.748
10114	HIPK3	S203	M201	L57	0.465	0.72	0.426	53.962	45.608
7290	HIRA	S452	M140	L86	0.995	0.973	0.79	-3.999	-22.722
8334	HIST1H2AC	S58	M1	L2	0.741	0.974	1	-83.141	5.893
3013	HIST1H2AD	S20	M5	L5	0.995	0.695	0.995	-34.715	54.997
3017	HIST1H2BD	S247	M208	L116	1	1	1	-89.847	-20.77
8343	HIST1H2BF	S487	M303	L115	1	1	0.89	-73.814	55.328
8345	HIST1H2BH	S211	M191	L73	1	0.965	0.48	22.294	11.379
8348	HIST1H2BO	S98	M101	L74	0.77	0.831	0.28	7.858	3.975
8366	HIST1H4B	S564	M2	L1	0.725	0.966	0.99	-44.551	-79.641
8364	HIST1H4C	S137	M25	L3	0.98	0.834	0.894	-13.346	8.387
8365	HIST1H4H	S638	M377	L1	0.895	0.675	1	-37.558	-89.661
3119	HLA-DQB1	S384	M68	L5	0.84	0.722	0.974	-45.615	49.346
3131	HLF	S60	M21	L3	0.953	0.985	0.918	-15.163	35.547
6596	HLTF	S516	M71	L14	0.595	0.542	0.778	8.526	91.232
10363	HMG20A	S174	M157	L3	1	0.949	0.791	10.247	29.598
3146	HMGB1	S728	M37	L10	0.466	0.948	0.678	-6.194	-5.115
22993	HMGXB3	S91	M3	L1	0.645	0.96	0.905	-17.878	-47.315
340784	HMX3	S128	M11	L4	0.65	0.74	0.96	48.146	-6.208
6928	HNF1B	S12	M13	L9	0.54	1	0.945	84.715	35.006
3172	HNF4A	S670	M346	L203	1	1	0.995	50.554	95.469
3178	HNRNPA1	S619	M443	L34	1	0.88	0.487	35.927	24.231
3181	HNRNPA2B1	S269	M228	L36	0.695	0.515	0.28	26.194	-14.648
220988	HNRNPA3	S619	M443	L34	1	0.88	0.487	36.355	23.794
3182	HNRNPAB	S311	M254	L3	1	0.925	0.485	33.425	67.986
3183	HNRNPC	S249	M210	L119	1	1	0.9	-24.267	-24.844
343069	HNRNPCL1	S105	M42	L27	1	0.995	0.7	29.931	46.797
3184	HNRNPD	S33	M23	L3	1	0.995	0.923	-15.548	22.057
9987	HNRNPDL	S233	M182	L3	1	0.63	0.789	8.538	32.492
3187	HNRNPH1	S15	M4	L6	0.62	0.99	1	98.419	-13.387
3190	HNRNPK	S571	M395	L2	0.95	0.53	0.969	-43.004	7.266
3191	HNRNPL	S414	M337	L2	0.985	0.7	0.845	-89.402	29.282
4670	HNRNPM	S100	M38	L24	1	0.995	0.65	14.36	12.662
3192	HNRNPU	S102	M103	L65	0.788	0.617	0.505	-15.138	47.603
221092	HNRNPUL2	S2	M6	L7	0.83	1	0.995	60.097	66.435
150280	HORMAD2	S26	M2	L1	0.96	0.958	1	-57.351	-84.208
3207	HOXA11	S51	M62	L26	1	1	0.915	36.805	81.825
3199	HOXA2	S286	M235	L135	1	1	0.985	-29.526	25.235
3200	HOXA3	S239	M173	L105	1	0.745	0.302	20.627	56.012
3203	HOXA6	S38	M31	L3	0.995	0.995	0.947	0.862	22.924
3216	HOXB6	S467	M268	L87	1	0.995	0.604	81.548	57.496
3217	HOXB7	S33	M23	L3	0.56	0.864	0.912	2.005	15.738
3229	HOXC13	S500	M352	L56	0.941	0.928	0.5	43.225	43.061
3236	HOXD10	S216	M78	L49	1	1	0.865	-66.355	40.128
3235	HOXD9	S467	M268	L87	1	0.995	0.604	81.606	57.134
3242	HPD	S23	M22	L16	0.99	0.99	0.935	-21.685	70.319
3249	HPN	S329	M74	L33	0.91	0.955	0.86	27.226	6.343
11234	HPS5	S525	M5	L5	0.985	0.473	0.985	-43.901	54.886
3265	HRAS	S446	M151	L88	0.96	0.96	0.71	38.917	-66.633
57110	PLAAT1	S62	M50	L3	0.985	0.72	0.768	-3.977	53.897
11255	HRH3	S199	M21	L3	0.57	0.963	0.918	-11.335	34.234
9653	HS2ST1	S186	M1	L2	0.94	0.928	0.995	-75.102	32.854
9956	HS3ST2	S233	M182	L3	0.6	0.485	0.725	9.472	33.936
9951	HS3ST4	S289	M238	L10	0.99	0.88	0.69	-0.987	-2.371
440498	HSBP1L1	S3	M3	L1	0.995	0.995	0.905	-24.435	-54.462
3028	HSD17B10	S9	M15	L15	0.976	1	1	30.945	-73.953
345275	HSD17B13	S260	M24	L3	0.845	0.835	0.533	3.768	62.278
51171	HSD17B14	S270	M207	L3	1	0.755	0.485	36.482	62.043
3295	HSD17B4	S569	M401	L48	1	0.68	0.589	49.155	84.942
80270	HSD3B7	S127	M121	L83	0.995	0.939	0.719	-54.688	24.894
3297	HSF1	S212	M194	L7	0.955	0.73	0.77	52.102	55.15
3320	HSP90AA1	S362	M274	L144	1	1	0.92	4.2	104.135
3326	HSP90AB1	S428	M326	L148	1	1	0.845	1.293	-26.43
7184	HSP90B1	S446	M151	L88	0.965	0.98	0.72	39.265	-68.22
3304	HSPA1B	S20	M5	L5	0.995	0.695	0.995	-36.21	54.604
3309	HSPA5	S1	M8	L8	1	1	1	79.415	-54.986
3312	HSPA8	S365	M14	L11	0.975	0.759	0.648	68.229	-24.852
3313	HSPA9	S129	M126	L2	0.94	0.755	0.985	-43.857	3.252
3329	HSPD1	S75	M80	L58	1	1	0.775	38.386	-79.733
3336	HSPE1	S75	M80	L58	1	1	0.775	38.717	-80.326
3339	HSPG2	S497	M354	L2	0.65	0.61	0.818	-38.734	14.397
27336	HTATSF1	S422	M319	L47	0.995	0.765	0.7	25.882	-25.984
3350	HTR1A	S154	M87	L4	0.995	0.9	0.957	55.832	18.536
3064	HTT	S343	M1	L2	0.785	0.53	0.905	-70.045	10.742
3364	HUS1	S70	M51	L35	1	0.99	0.73	24.781	16.784
10075	HUWE1	S485	M285	L51	1	0.995	0.96	41.048	-27.307
10525	HYOU1	S16	M4	L6	0.528	1	1	91.14	-4.785
285148	IAH1	S3	M3	L1	0.99	0.995	0.905	-19.538	-53.812
3376	IARS	S400	M1	L2	0.945	0.825	1	-86.701	16.517
55699	IARS2	S75	M80	L58	1	1	0.775	39.262	-81.147
79664	ICE2	S49	M63	L10	1	0.823	0.714	10.034	-8.974
3399	ID3	S60	M21	L3	0.995	0.955	0.892	-17.302	33.954
3400	ID4	S460	M5	L5	0.39	0.649	0.925	-26.913	58.369
3419	IDH3A	S640	M411	L192	0.6	0.665	0.745	69.74	-0.005
3422	IDI1	S302	M214	L123	1	0.805	0.905	-23.099	50.832
8870	IER3	S296	M243	L4	0.995	0.88	0.929	42.899	13.357
3428	IFI16	S4	M1	L2	0.928	1	1	-82.849	16.928
3430	IFI35	S729	M5	L5	0	0.944	0.99	-40.524	39.24
439996	IFIT1B	S298	M245	L1	1	0.58	0.908	-18.089	-41.802
3447	IFNA13	S487	M303	L115	1	1	0.89	-73.812	54.844
3441	IFNA4	S600	M61	L2	0.795	0.45	0.97	-60.058	5.055
3442	IFNA5	S127	M121	L83	0.995	0.939	0.719	-55.159	25.457
338376	IFNE	S147	M1	L2	0.655	0.759	1	-82.54	-8.474
9742	IFT140	S313	M229	L4	0.969	0.685	0.908	60.831	4.403
56912	IFT46	S186	M1	L2	0.94	0.928	0.995	-74.607	31.277
3476	IGBP1	S730	M197	L6	0	0.695	0.964	81.271	-14.313
3480	IGF1R	S446	M151	L88	0.955	0.965	0.71	39.13	-67.419
3481	IGF2	S8	M5	L5	0.826	0.99	0.995	-42.327	52.363
10642	IGF2BP1	S630	M420	L70	1	0.995	0.315	68.231	52.65
3483	IGFALS	S2	M6	L7	0.733	1	0.995	57.006	71.286
3485	IGFBP2	S4	M1	L2	0.959	1	1	-81.236	16.13
3490	IGFBP7	S99	M104	L64	0.52	0.98	0.824	-18.214	61.761
347252	IGFBPL1	S7	M2	L1	0.81	0.985	1	-52.164	-79.003
374918	IGFL1	S3	M3	L1	0.495	0.978	0.905	-23.46	-60.947
79713	IGFLR1	S3	M3	L1	0.6	0.985	0.905	-24.048	-59.476
285313	IGSF10	S7	M2	L1	0.545	0.985	1	-50.061	-80.634
3549	IHH	S199	M21	L3	0.4	0.963	0.923	-9.344	34.797
3550	IK	S163	M69	L34	0.755	0.69	0.475	33.201	32.146
3596	IL13	S10	M1	L2	0.651	0.766	1	-86.897	-4.335
29949	IL19	S663	M1	L2	0.77	0.636	1	-88.783	11.262
3552	IL1A	S731	M17	L2	0	0.67	0.995	-57.644	-14.384
84639	IL1F10	S58	M1	L2	0.741	0.974	1	-83.163	5.679
8808	IL1RL2	S205	M187	L31	0.99	0.99	0.716	-61.574	33.495
50616	IL22	S22	M1	L2	0.772	0.98	1	-79.715	7.989
51561	IL23A	S129	M126	L2	0.94	0.755	0.985	-43.583	3.808
9235	IL32	S283	M232	L2	0.995	0.99	0.922	-97.993	3.294
146433	IL34	S86	M2	L1	0.606	0.979	1	-46.491	-79.179
27178	IL37	S21	M10	L2	0.415	0.979	0.99	-53.993	-7.222
3570	IL6R	S23	M22	L16	0.99	0.99	0.935	-20.049	69.447
3608	ILF2	S250	M86	L62	0.995	1	0.915	34.438	6.367
3609	ILF3	S250	M86	L62	0.995	1	0.915	34.5	6.261
3611	ILK	S12	M13	L9	0.575	1	0.945	84.983	39.055
10989	IMMT	S73	M82	L1	1	0.91	0.995	-18.79	-80.657
55272	IMP3	S1	M8	L8	1	1	1	76.348	-59.054
92856	IMP4	S84	M92	L60	0.995	1	0.965	-65.256	48.475
55364	IMPACT	S218	M49	L3	0.595	0.655	0.862	-17.326	16.436
3615	IMPDH2	S29	M33	L17	1	1	0.96	9.286	-41.126
3619	INCENP	S56	M64	L44	1	1	0.77	18.168	-29.48
3622	ING2	S8	M5	L5	0.843	1	0.995	-38.357	48.716
3623	INHA	S732	M36	L2	0	0.45	0.959	-46.54	12.749
54617	INO80	S463	M318	L167	1	1	1	119.49	27.182
56623	INPP5E	S560	M374	L2	0.99	0.54	0.465	-55.104	-23.41
3638	INSIG1	S3	M3	L1	0.965	0.995	0.905	-26.935	-56.841
55174	INTS10	S138	M2	L1	0.99	0.977	0.98	-44.188	-87.32
54973	INTS11	S634	M18	L1	0.545	0.785	1	-32.826	-70.784
65123	INTS3	S16	M4	L6	0.555	1	1	90.367	-1.913
92105	INTS4	S179	M14	L11	0.865	0.919	0.648	65.573	-22.401
26512	INTS6	S16	M4	L6	0.503	1	1	89.004	-4.142
25896	INTS7	S57	M54	L1	1	0.865	0.88	-51.01	-51.3
55656	INTS8	S1	M8	L8	0.97	1	1	75.592	-57.4
55756	INTS9	S634	M18	L1	0.545	0.785	1	-32.875	-70.848
27130	INVS	S323	M227	L2	0.985	0.815	0.827	-78.845	33.742
9807	IP6K1	S324	M222	L63	1	0.81	0.393	23.494	31.338
51447	IP6K2	S139	M67	L9	1	0.775	0.793	76.106	41.918
51194	IPO11	S73	M82	L1	1	0.91	0.995	-18.991	-82.994
9670	IPO13	S1	M8	L8	0.903	1	1	85.665	-57.81
10527	IPO7	S6	M11	L4	0.94	0.755	0.96	51.867	-4.645
55705	IPO9	S295	M46	L3	0.565	0.925	0.669	9.355	77.298
389124	IQCF5	S3	M3	L1	0.995	0.995	0.905	-22.902	-54.345
8826	IQGAP1	S48	M27	L14	1	0.995	0.584	9.86	48.483
3658	IREB2	S68	M77	L20	1	1	0.425	14.406	-44.354
359948	IRF2BP2	S292	M1	L2	0.765	0.786	1	-79.541	0.733
3662	IRF4	S119	M119	L10	0.68	0.625	0.249	-7.888	1.452
3667	IRS1	S219	M84	L12	0.995	0.73	0.99	28.918	-35.18
79191	IRX3	S103	M109	L29	0.99	1	0.72	-20.471	30.824
10265	IRX5	S45	M40	L25	0.993	0.932	0.653	28.885	26.002
81689	ISCA1	S618	M435	L1	1	0.895	0.994	-15.875	-87.044
122961	ISCA2	S18	M12	L1	1	0.84	0.994	5.503	-89.232
23479	ISCU	S180	M188	L2	0.926	0.595	0.995	-59.44	-11.188
3669	ISG20	S161	M132	L85	1	1	0.98	-28.057	91.936
145501	ISM2	S86	M2	L1	0.645	0.979	1	-47.923	-81.982
9798	IST1	S442	M3	L1	0.755	0.995	0.905	-35.16	-55.912
57461	ISY1	S112	M10	L2	0.955	0.88	0.985	-44.986	-1.643
83737	ITCH	S475	M22	L16	0.635	0.57	0.755	-16.164	72.521
55846	ITFG2	S523	M367	L206	1	0.99	0.925	-70.58	-45.994
3681	ITGAD	S296	M243	L4	0.995	0.88	0.929	43.4	13.282
3684	ITGAM	S259	M130	L3	1	0.93	0.228	-8.72	66.649
3685	ITGAV	S39	M13	L9	0.575	1	0.945	82.54	33.67
3687	ITGAX	S56	M64	L44	0.969	0.958	0.64	13.062	-29.503
9270	ITGB1BP1	S646	M444	L1	0.98	0.7	0.899	-12.561	-54.324
3693	ITGB5	S39	M13	L9	0.575	1	0.945	83.378	32.908
3694	ITGB6	S521	M50	L3	0.665	0.697	0.718	-10.194	76.44
55600	ITLN1	S5	M7	L4	1	1	0.96	46.27	21.83
284359	IZUMO1	S409	M198	L1	0.91	0.597	0.974	-49.75	-63.474
79960	JADE1	S498	M5	L5	0.9	0.508	0.995	-33.388	33.962
182	JAG1	S254	M224	L11	1	1	0.707	64.239	-32.843
3717	JAK2	S733	M30	L3	0	0.455	0.672	6.784	75.562
83700	JAM3	S330	M213	L1	0.825	0.485	0.552	-55.047	-51.825
339123	JMJD8	S502	M7	L4	1	0.442	0.96	52.471	27.662
84502	JPH4	S36	M44	L12	1	1	0.995	35.85	-34.401
51155	JPT1	S629	M93	L1	0.73	0.568	0.459	-40.002	-45.293
90861	JPT2	S23	M22	L16	1	1	0.935	-23.081	73.688
3725	JUN	S114	M100	L28	0.595	0.899	0.889	-61.71	-32.107
3726	JUNB	S196	M73	L50	0.955	0.95	0.265	19.229	20.28
3728	JUP	S425	M322	L5	1	0.965	0.692	-42.704	43.776
284058	KANSL1	S120	M117	L18	1	0.925	0.505	38.82	-5.291
55683	KANSL3	S120	M117	L18	1	0.925	0.505	38.144	-6.587
3735	KARS	S4	M1	L2	1	1	1	-78.682	17.982
10524	KAT5	S357	M270	L139	1	1	0.824	10.637	-25.546
11143	KAT7	S148	M143	L56	0.99	0.945	0.935	40.369	41.877
84148	KAT8	S120	M117	L18	1	0.925	0.505	38.753	-6.512
84056	KATNAL1	S291	M7	L4	0.77	0.992	0.819	58.787	26.036
10300	KATNB1	S157	M144	L81	1	1	0.79	57.211	-30.075
79768	KATNBL1	S26	M2	L1	0.96	0.958	1	-56.959	-85.994
56888	KCMF1	S185	M165	L102	1	1	0.995	27.728	-95.863
3739	KCNA4	S356	M275	L138	1	0.975	0.775	3.914	0.729
3743	KCNA7	S28	M26	L3	0.503	0.53	0.495	-3.509	62.323
9196	KCNAB3	S505	M122	L79	0.91	0.935	0.477	-37.65	2.638
3747	KCNC2	S333	M259	L6	0.995	0.97	0.952	87.018	3.806
93107	KCNG4	S305	M105	L77	0.995	1	0.96	47.397	-53.523
23416	KCNH3	S441	M338	L3	0.995	0.605	0.923	-16.183	26.374
3773	KCNJ16	S61	M72	L53	1	1	0.37	32.742	-4.305
3776	KCNK2	S28	M26	L3	0.995	0.995	0.41	18.221	38.52
83892	KCTD10	S356	M275	L138	1	0.975	0.775	3.426	0.304
79047	KCTD15	S350	M46	L3	0.91	0.592	0.783	6.184	80.1
11014	KDELR2	S137	M25	L3	0.98	0.834	0.894	-12.066	8.053
23028	KDM1A	S242	M184	L45	1	0.985	0.4	-21.204	-8.139
22992	KDM2A	S305	M105	L77	0.995	1	0.96	47.924	-53.484
84678	KDM2B	S66	M79	L4	1	0.755	0.895	47.408	-13.56
2531	KDSR	S15	M4	L6	0.875	0.964	0.97	101.852	-10.723
9817	KEAP1	S151	M148	L51	1	0.71	0.245	13.905	4.845
8570	KHSRP	S570	M404	L187	1	1	0.98	26.051	-65.192
9703	KIAA0100	S176	M168	L4	0.975	0.705	0.906	52.797	15.981
285600	KIAA0825	S303	M2	L1	0.689	0.861	1	-45.842	-70.337
57535	KIAA1324	S2	M6	L7	0.829	1	0.995	61.354	68.377
57670	KIAA1549	S74	M5	L5	0.717	0.99	0.99	-32.305	43.863
3832	KIF11	S88	M66	L22	0.984	0.995	0.86	33.733	-19.871
9928	KIF14	S539	M6	L7	0.764	1	0.995	59.735	61.041
56992	KIF15	S734	M467	L15	0	0	0.605	28.334	-70.704
81930	KIF18A	S108	M111	L36	1	0.91	0.445	65.288	13.528
547	KIF1A	S465	M343	L4	1	0.61	0.955	48.734	5.092
10112	KIF20A	S630	M420	L70	1	0.995	0.315	68.213	52.64
9585	KIF20B	S176	M168	L4	0.975	0.705	0.906	51.735	14.248
3835	KIF22	S34	M35	L4	0.995	0.631	0.951	65.898	17.405
9493	KIF23	S531	M31	L3	0.98	0.925	0.858	4.349	13.407
9371	KIF3B	S77	M5	L5	0.985	0.941	0.995	-30.914	37.069
3833	KIFC1	S544	M380	L3	1	0.645	0.437	9.906	18.347
3801	KIFC3	S555	M7	L4	0.55	0.439	0.96	57.631	8.876
84063	KIRREL2	S208	M7	L4	0.925	0.443	0.96	47.92	8.953
9365	KL	S304	M59	L18	0.9	0.475	0.508	41.353	-10.639
3831	KLC1	S5	M7	L4	1	1	0.96	42.732	22.801
147700	KLC3	S6	M11	L4	0.594	0.755	0.95	51.396	-1.446
11278	KLF12	S519	M6	L7	0.73	0.948	0.99	53.702	68.51
83855	KLF16	S345	M32	L19	0.925	0.865	0.237	23.547	54.703
9314	KLF4	S8	M5	L5	0.534	1	0.995	-36.677	41.428
688	KLF5	S281	M221	L3	0.98	0.785	0.717	-12.04	23.665
90293	KLHL13	S232	M7	L4	0.475	0.453	0.96	60.692	17.942
80311	KLHL15	S145	M145	L32	1	1	0.8	32.504	1.713
257240	KLHL34	S123	M95	L68	1	1	0.51	-16.241	85.449
57563	KLHL8	S5	M7	L4	0.626	0.933	0.96	48.734	15.472
3816	KLK1	S425	M322	L5	1	0.965	0.692	-42.591	43.473
26085	KLK13	S292	M1	L2	0.765	0.786	1	-79.996	0.861
3817	KLK2	S139	M67	L9	0.995	0.786	0.793	74.346	43.362
9622	KLK4	S147	M1	L2	0.655	0.759	1	-83.551	-10.476
284366	KLK9	S389	M292	L160	0.995	0.995	0.83	-101.052	-16.55
100144748	KLLN	S318	M3	L1	0.6	0.995	0.905	-28.221	-52.433
3821	KLRC1	S84	M92	L60	1	1	0.97	-64.014	46.608
9757	KMT2B	S501	M202	L110	0.545	0.747	0.278	41.772	36.415
58508	KMT2C	S293	M37	L10	0.975	0.899	0.651	-13.852	-4.835
8085	KMT2D	S119	M119	L10	1	0.875	0.277	-4.58	3.273
387893	KMT5A	S208	M7	L4	0.925	0.443	0.96	49.613	8.138
84787	KMT5C	S232	M7	L4	0.515	0.444	0.96	56.927	13.013
57082	KNL1	S66	M79	L4	1	0.74	0.93	47.606	-11.785
3840	KPNA4	S135	M131	L84	1	1	0.995	-26.204	-15.321
3837	KPNB1	S141	M59	L18	1	0.99	0.484	48.068	-20.238
3845	KRAS	S182	M162	L101	1	1	0.835	27.807	34.461
11103	KRR1	S21	M10	L2	0.995	0.995	0.99	-53.523	-3.725
3848	KRT1	S174	M157	L3	1	0.955	0.801	9.893	28.41
3849	KRT2	S173	M9	L1	0.784	0.521	1	-24.264	-91.143
192666	KRT24	S84	M92	L60	1	1	0.97	-63.386	48.626
51350	KRT76	S387	M159	L96	0.98	0.965	0.875	-59.597	-67.023
3857	KRT9	S651	M381	L1	0.995	0.854	0.994	-15.933	-76.581
81850	KRTAP1-3	S288	M237	L137	1	1	0.98	-4.674	-30.05
728224	KRTAP4-8	S7	M2	L1	1	0.985	1	-54.04	-75.848
200634	KRTCAP3	S651	M381	L1	0.995	0.854	0.994	-15.624	-76.505
883	KYAT1	S295	M46	L3	0.565	0.925	0.669	9.602	75.923
26013	L3MBTL1	S511	M355	L109	1	0.84	0.406	1.126	83.505
22798	LAMB4	S241	M9	L1	0.716	0.516	1	-38.28	-80.969
3915	LAMC1	S327	M230	L1	0.995	0.8	0.897	-57.151	-90.801
3920	LAMP2	S579	M106	L5	0.965	0.823	0.959	-37.489	37.795
28956	LAMTOR2	S96	M3	L1	0.58	0.995	0.905	-28.624	-47.662
23367	LARP1	S25	M2	L1	0.979	0.718	1	-36.432	-68.895
51574	LARP7	S107	M116	L4	1	0.65	0.929	52.402	10.273
51520	LARS	S113	M58	L2	0.586	0.721	0.835	-40.191	-4.764
81887	LAS1L	S217	M185	L106	1	1	0.805	9.73	-73.866
3927	LASP1	S412	M305	L9	0.995	0.68	0.768	77.477	50.044
79081	LBHD1	S187	M28	L2	0.675	0.61	0.861	-59.509	17.773
167691	LCA5	S3	M3	L1	0.98	0.995	0.905	-22.86	-58.157
414332	LCN10	S252	M1	L2	0.555	0.863	0.985	-83.289	27.989
392399	LCN9	S239	M173	L105	0.935	0.769	0.345	-9.752	70.762
160287	LDHAL6A	S212	M194	L7	1	0.74	0.791	53.417	56.175
3948	LDHC	S175	M155	L45	0.985	0.99	0.335	-22.401	-2.063
51176	LEF1	S313	M229	L4	0.975	0.675	0.913	61.22	2.874
7044	LEFTY2	S486	M277	L149	1	0.995	0.76	41.77	91.361
221496	LEMD2	S7	M2	L1	1	0.985	1	-47.151	-74.438
123169	LEO1	S61	M72	L53	1	1	0.37	33.031	-9.792
3954	LETM1	S457	M43	L23	0.855	0.954	0.695	-18.711	-15.357
137994	LETM2	S70	M51	L35	1	0.99	0.725	27.417	15.55
85329	LGALS12	S105	M42	L27	1	0.995	0.7	28.153	48.254
148003	LGALS16	S2	M6	L7	0.83	1	0.995	58.209	66.151
654346	LGALS9C	S2	M6	L7	0.733	1	0.995	56.795	72.059
59352	LGR6	S557	M51	L35	0.99	0.842	0.585	26.448	10.756
375323	LHFPL4	S3	M3	L1	0.908	0.995	0.905	-21.695	-51.155
64077	LHPP	S258	M99	L2	0.99	0.635	0.995	-73.867	-8.09
64211	LHX5	S20	M5	L5	0.68	0.555	0.99	-31.184	60.442
431707	LHX8	S161	M132	L85	1	1	0.98	-28.663	90.78
3977	LIFR	S72	M21	L3	0.836	0.642	0.914	-7.689	22.106
3978	LIG1	S332	M248	L118	1	0.711	0.665	6.909	-31.31
11006	LILRB4	S117	M60	L2	0.599	0.434	0.792	-27.08	74.026
22998	LIMCH1	S613	M451	L4	0.62	0.477	0.76	51.234	44.215
8825	LIN7A	S465	M343	L4	1	0.61	0.955	48.982	4.525
55327	LIN7C	S178	M7	L4	0.945	0.434	0.96	58.741	11.535
3991	LIPE	S81	M61	L2	0.981	0.503	0.878	-104.554	7.035
8513	LIPF	S22	M1	L2	0.88	0.98	1	-75.898	5.499
200879	LIPH	S28	M26	L3	0.99	1	0.41	15.597	41.798
9516	LITAF	S201	M181	L114	0.988	0.961	0.635	29.198	96.242
3993	LLGL2	S98	M101	L74	0.868	0.925	0.305	11.735	5.276
89782	LMLN	S47	M29	L3	0.98	0.939	0.805	-2.61	47.778
4000	LMNA	S65	M32	L19	1	1	0.236	21.688	51.315
84823	LMNB2	S201	M181	L114	0.988	0.961	0.635	29.328	96.138
4008	LMO7	S67	M43	L23	0.995	1	0.695	-14.112	-18.408
56203	LMOD3	S44	M9	L1	0.962	0.487	1	-30.4	-89.904
9361	LONP1	S75	M80	L58	1	1	0.775	39.055	-79.139
83752	LONP2	S392	M41	L10	0.84	0.744	0.815	-3.044	-7.513
84695	LOXL3	S24	M4	L6	0.645	1	1	96.78	2.543
4023	LPL	S350	M46	L3	0.564	0.853	0.681	7.491	78.534
4026	LPP	S462	M293	L9	1	0.96	0.641	81.491	51.276
26103	LRIT1	S371	M2	L1	0.53	0.782	0.995	-42.681	-91.169
4040	LRP6	S20	M5	L5	0.955	0.695	0.995	-34.312	52.674
10128	LRPPRC	S9	M15	L15	1	1	1	31.829	-79.985
126364	LRRC25	S278	M231	L1	0.718	0.738	0.924	-22.825	-67.335
123355	LRRC28	S152	M55	L2	1	0.935	0.615	-77.008	39.734
26231	LRRC29	S4	M1	L2	0.928	1	1	-83.79	17.884
79782	LRRC31	S34	M35	L4	0.45	0.47	0.96	62.591	18.536
151827	LRRC34	S637	M233	L4	0.935	0.595	0.789	47.086	15.65
127495	LRRC39	S735	M468	L7	0.607	0.585	0.775	59.466	65.128
201255	LRRC45	S85	M45	L1	1	0.985	0.663	-16.928	-69.607
90506	LRRC46	S294	M242	L121	0.955	0.995	0.66	-18.927	-37.472
84230	LRRC8C	S145	M145	L32	1	1	0.8	31.763	0.343
55144	LRRC8D	S267	M9	L1	0.495	0.488	1	-33.532	-83.117
222229	LRWD1	S301	M27	L14	0.89	0.61	0.725	8.95	45.796
55341	LSG1	S225	M108	L72	1	1	1	-43.142	-25.882
57819	LSM2	S271	M197	L6	1	0.955	0.904	79.2	-15.799
27258	LSM3	S93	M97	L2	1	0.97	0.922	-85.899	33.732
25804	LSM4	S93	M97	L2	1	0.97	0.922	-85.833	33.511
23658	LSM5	S228	M1	L2	0.965	0.593	1	-89.133	19.323
11157	LSM6	S93	M97	L2	0.99	0.979	0.91	-86.312	35.45
51690	LSM7	S81	M61	L2	0.985	0.46	0.985	-58.357	0.922
4049	LTA	S116	M1	L2	0.745	0.565	1	-88.461	6.701
4050	LTB	S491	M294	L147	1	1	1	-53.838	67.066
1241	LTB4R	S56	M64	L44	0.969	0.958	0.64	13.585	-29.569
4057	LTF	S407	M1	L2	0.93	0.764	1	-78.988	-11.282
26046	LTN1	S10	M1	L2	0.99	0.765	1	-85.3	-5.802
84946	LTV1	S2	M6	L7	1	1	0.995	70.002	71.872
51631	LUC7L2	S180	M188	L2	0.985	0.69	0.977	-61.728	-11.848
51747	LUC7L3	S16	M4	L6	0.415	0.985	1	85.097	-5.462
259215	LY6G6F	S2	M6	L7	0.81	1	0.995	55.56	65.517
23643	LY96	S4	M1	L2	0.873	1	1	-82.399	14.625
254773	LYG2	S3	M3	L1	0.98	0.995	0.905	-20.957	-57.565
57149	LYRM1	S174	M157	L3	0.975	0.935	0.768	10.843	27.543
57128	LYRM4	S16	M4	L6	0.415	0.985	1	84.947	-6.172
10894	LYVE1	S186	M1	L2	0.94	0.928	0.995	-76.532	33.22
4069	LYZ	S218	M49	L3	0.595	0.655	0.862	-18.715	16.318
84328	LZIC	S307	M251	L117	0.955	0.813	0.59	-96.992	10.567
4085	MAD2L1	S105	M42	L27	1	0.995	0.7	30.311	47.414
10459	MAD2L2	S11	M4	L6	0.615	1	1	86.442	-8.406
10296	MAEA	S430	M202	L110	1	0.981	0.698	45.804	37.572
4094	MAF	S211	M191	L73	1	0.965	0.48	20.856	11.594
84232	MAF1	S85	M45	L1	1	0.985	0.663	-15.889	-69.736
23764	MAFF	S444	M107	L11	0.97	0.735	0.66	60.745	-25.285
4099	MAG	S2	M6	L7	0.995	1	0.995	59.782	73.814
4108	MAGEA9	S151	M148	L51	1	0.71	0.245	15.905	2.956
9947	MAGEC1	S2	M6	L7	0.81	1	0.969	53.426	61.721
10916	MAGED2	S5	M7	L4	1	0.995	0.96	47.1	25.732
4116	MAGOH	S338	M239	L136	1	0.975	0.51	-49.809	23.339
55110	MAGOHB	S175	M155	L45	1	0.99	0.335	-22.74	-3.551
79568	MAIP1	S3	M3	L1	0.811	0.995	0.905	-25.219	-47.045
84549	MAK16	S7	M2	L1	1	0.985	1	-52.791	-75.545
4118	MAL	S31	M12	L1	0.99	0.98	0.994	-11.884	-88.123
9794	MAML1	S4	M1	L2	1	1	1	-77.543	15.595
57134	MAN1C1	S593	M1	L2	0.427	0.748	1	-91.648	-3.569
55201	MAP1S	S209	M189	L59	0.989	0.984	0.693	-43.48	-98.783
5604	MAP2K1	S736	M151	L88	0	0.606	0.535	37.547	-71.719
7786	MAP3K12	S429	M327	L3	0.985	0.515	0.528	3.644	71.758
80122	MAP3K19	S236	M141	L28	0.911	0.87	0.801	-53.315	-39.771
10746	MAP3K2	S336	M113	L39	0.96	0.94	0.6	2.111	74.504
51776	MAP3K20	S32	M19	L3	1	0.965	0.96	2.5	30.343
4215	MAP3K3	S251	M29	L3	0.593	0.913	0.805	0.234	43.371
9064	MAP3K6	S408	M340	L3	1	0.985	0.36	28.289	75.767
6885	MAP3K7	S266	M226	L132	1	1	1	17	-69.944
5594	MAPK1	S575	M410	L42	0.99	0.99	0.879	20.879	-48.926
5600	MAPK11	S251	M29	L3	0.71	0.905	0.805	1.438	42.327
6300	MAPK12	S20	M5	L5	0.978	0.683	0.995	-30.956	50.983
5596	MAPK4	S64	M19	L3	0.95	0.71	0.965	-6.663	27.464
23162	MAPK8IP3	S445	M339	L143	0.995	0.97	0.9	-65.752	-66.753
79109	MAPKAP1	S39	M13	L9	0.575	0.99	0.935	84.003	32.366
8550	MAPKAPK5	S83	M91	L3	0.92	0.48	0.538	10.357	69.002
22919	MAPRE1	S230	M186	L4	1	0.98	0.952	62.13	-2.815
162333	2021-03-10	S383	M60	L2	0.655	0.365	0.974	-63.223	8.371
8685	MARCO	S579	M106	L5	0.965	0.823	0.959	-37.654	37.862
2011	MARK2	S578	M414	L9	0.99	0.78	0.945	86.951	43.958
92935	MARS2	S11	M4	L6	0.844	1	1	93.854	-5.644
153562	MARVELD2	S319	M163	L2	0.985	0.795	0.939	-65.4	26.653
91862	MARVELD3	S3	M3	L1	0.964	0.985	0.905	-28.378	-55.233
5648	MASP1	S276	M212	L122	1	0.955	0.49	12.832	103.175
10747	MASP2	S265	M225	L131	1	1	0.865	-43.997	70.809
22983	MAST1	S386	M161	L98	1	0.98	0.815	38.652	72.263
23139	MAST2	S62	M50	L3	0.97	0.724	0.768	-1.991	51.758
84930	MASTL	S56	M64	L44	1	1	0.77	16.309	-30.46
4144	MAT2A	S299	M246	L124	1	0.96	0.905	-91.884	-47.463
8785	MATN4	S2	M6	L7	1	1	0.995	64.634	70.992
9782	MATR3	S76	M10	L2	0.85	0.958	0.985	-48.999	-8.999
23383	MAU2	S142	M134	L89	1	1	1	5.377	-63.52
4149	MAX	S175	M155	L45	1	0.99	0.335	-22.264	-4.077
8932	MBD2	S234	M115	L76	0.98	0.78	0.82	40.095	-54.447
4154	MBNL1	S69	M41	L10	1	0.755	0.815	-1.531	-12.994
4158	MC2R	S39	M13	L9	0.535	0.929	0.87	79.982	32.281
4161	MC5R	S51	M62	L26	1	1	0.915	35.339	81.518
4162	MCAM	S223	M169	L78	0.985	0.88	0.46	25.367	-8.438
84693	MCEE	S391	M1	L2	0.535	0.756	1	-79.343	-8.044
23101	MCF2L2	S284	M219	L125	0.985	0.85	0.41	64.642	45.835
4170	MCL1	S369	M278	L100	1	1	0.87	64.981	39.504
4171	MCM2	S40	M48	L30	1	1	0.97	43.949	-36.417
4172	MCM3	S74	M5	L5	0.742	0.989	0.99	-30.743	44.218
8888	MCM3AP	S122	M94	L67	1	1	0.64	-62.479	-53.579
4173	MCM4	S473	M29	L3	0.845	0.859	0.81	-5.695	45.952
4174	MCM5	S40	M48	L30	1	1	0.97	44.042	-36.786
4175	MCM6	S40	M48	L30	1	1	0.97	44.319	-37.277
4176	MCM7	S40	M48	L30	1	1	0.97	45.339	-37.723
157777	MCMDC2	S138	M2	L1	0.99	0.977	0.98	-45.096	-88.35
255231	MCOLN2	S2	M6	L7	0.899	1	0.995	68.453	74.192
55283	MCOLN3	S243	M205	L61	0.98	0.865	0.495	-85.064	40.566
79648	MCPH1	S197	M178	L113	0.715	0.715	0.69	-31.896	-12.409
10445	MCRS1	S120	M117	L18	1	0.925	0.505	38.682	-5.893
4192	MDK	S160	M1	L2	0.82	0.756	1	-89.903	-11.605
4193	MDM2	S67	M43	L23	1	1	0.695	-15.158	-16.27
4194	MDM4	S67	M43	L23	1	1	0.695	-15.414	-15.614
23195	MDN1	S7	M2	L1	1	0.985	1	-54.299	-73.779
4204	MECP2	S323	M227	L2	0.98	0.815	0.821	-80.327	34.157
51102	MECR	S489	M24	L3	0.665	0.944	0.533	6.03	68.782
5469	MED1	S27	M34	L10	1	1	0.815	3.041	-12.868
84246	MED10	S27	M34	L10	1	1	0.815	1.819	-12.953
400569	MED11	S2	M6	L7	0.817	1	0.995	61.723	65.028
9968	MED12	S69	M41	L10	1	0.755	0.815	-2.183	-10.754
9282	MED14	S27	M34	L10	1	1	0.815	4.218	-12.23
9440	MED17	S27	M34	L10	0.538	0.995	0.804	3.929	-8.24
219541	MED19	S69	M41	L10	1	0.755	0.815	-1.879	-10.823
9477	MED20	S27	M34	L10	1	1	0.815	3.659	-11.033
9412	MED21	S213	M196	L3	0.995	0.905	0.751	0.869	37.148
6837	MED22	S144	M138	L13	1	0.945	1	56.291	-67.167
9439	MED23	S69	M41	L10	1	0.755	0.815	-1.533	-12.267
9862	MED24	S69	M41	L10	1	0.755	0.815	-1.557	-11.518
9441	MED26	S27	M34	L10	1	1	0.815	4.693	-10.617
9442	MED27	S737	M469	L3	0.45	0.846	0.376	-28.015	8.498
80306	MED28	S576	M412	L197	1	0.805	0.485	7.532	-13.578
55588	MED29	S493	M353	L14	0.859	0.859	0.445	2.342	86.888
90390	MED30	S576	M412	L197	1	0.805	0.485	7.586	-13.6
29079	MED4	S49	M63	L10	0.972	0.797	0.694	11.178	-8.684
10001	MED6	S354	M287	L158	1	1	0.995	-27.492	-29.98
9443	MED7	S27	M34	L10	0.969	1	0.815	3.381	-14.537
112950	MED8	S27	M34	L10	1	1	0.815	5.156	-10.914
55090	MED9	S27	M34	L10	1	1	0.815	2.379	-12.985
1953	MEGF6	S4	M1	L2	0.928	1	1	-82.593	19.195
4221	MEN1	S624	M439	L4	0.995	0.82	0.954	51.355	33.984
56257	MEPCE	S225	M108	L72	1	1	1	-44.232	-25.704
23184	MESD	S26	M2	L1	0.943	0.952	1	-54.94	-80.081
10988	METAP2	S184	M164	L99	1	0.975	0.535	56.287	-20.628
79066	METTL16	S1	M8	L8	0.979	1	1	77.345	-50.389
55798	METTL2B	S104	M23	L3	0.89	0.879	0.892	-15.884	45.071
4236	MFAP1	S393	M1	L2	0.44	0.578	1	-64.42	21.663
4237	MFAP2	S7	M2	L1	0.545	0.985	1	-50.486	-80.043
9848	MFAP3L	S7	M2	L1	1	0.985	1	-51.393	-73.054
9258	MFHAS1	S103	M109	L29	1	1	0.72	-23.172	30.727
55669	MFN1	S90	M96	L48	0.732	0.785	0.646	69.275	32.007
84975	MFSD5	S3	M3	L1	0.893	0.949	0.905	-18.942	-50.062
23269	MGA	S2	M6	L7	0.984	1	0.995	61.772	73.627
84709	MGARP	S437	M333	L4	0.985	0.55	0.939	52.527	21.211
4245	MGAT1	S551	M387	L3	0.975	0.59	0.569	-25.649	35.962
4255	MGMT	S153	M149	L43	1	0.98	0.54	3.847	-22.918
8190	MIA	S3	M3	L1	0.6	0.985	0.905	-24.947	-61.725
54069	MIS18A	S122	M94	L67	1	1	0.64	-62.843	-52.05
55320	MIS18BP1	S589	M4	L6	0.57	0.98	1	99.162	-14.682
4286	MITF	S738	M76	L54	0	0.83	0.849	-14.707	-26.457
2872	MKNK2	S462	M293	L9	0.97	0.945	0.608	82.542	52.566
283078	MKX	S739	M120	L69	0	0.48	0.43	17.69	86.393
23209	MLC1	S20	M5	L5	0.995	0.695	0.995	-35.021	54.663
8079	MLF2	S5	M7	L4	1	1	0.96	46.524	19.203
4300	MLLT3	S64	M19	L3	0.95	0.71	0.965	-6.397	27.621
4302	MLLT6	S496	M167	L3	0.985	0.52	0.41	15.837	72.387
4295	MLN	S58	M1	L2	0.695	0.974	1	-82.833	2.153
64223	MLST8	S46	M65	L46	1	1	1	83.932	19.791
51085	MLXIPL	S547	M19	L3	0.441	0.722	0.755	-4.111	30.865
166785	MMAA	S114	M100	L28	1	1	0.99	-60.577	-35.634
25974	MMACHC	S3	M3	L1	0.908	0.995	0.905	-20.53	-51.582
79258	MMEL1	S101	M20	L3	0.47	0.96	0.53	22.991	73.605
64386	MMP25	S536	M215	L2	0.935	0.57	0.833	-43.853	12.371
4316	MMP7	S740	M470	L19	0.705	0.65	0.187	18.957	48.379
64210	MMS19	S14	M16	L13	1	1	1	53.779	-62.073
253714	MMS22L	S66	M79	L4	1	0.74	0.93	47.039	-11.685
25843	MOB4	S24	M4	L6	0.512	1	1	94.279	2.949
4336	MOBP	S165	M136	L90	1	1	0.93	-46.702	17.665
4338	MOCS2	S319	M163	L2	0.995	0.765	0.962	-66.257	24.281
80168	MOGAT2	S23	M22	L16	1	1	0.935	-23.347	72.203
5891	MOK	S558	M5	L5	0.56	1	0.995	-33.95	41.492
23515	MORC3	S8	M5	L5	0.851	1	0.995	-40.287	48.393
9643	MORF4L2	S84	M92	L60	1	1	0.97	-64.444	47.121
10199	MPHOSPH10	S164	M3	L1	0.503	0.978	0.905	-21.91	-61.449
10200	MPHOSPH6	S41	M9	L1	0.68	0.533	1	-25.633	-83.558
758	MPPED1	S102	M103	L65	0.906	0.714	0.55	-14.603	48.579
23164	MPRIP	S345	M32	L19	0.925	0.865	0.237	23.517	54.461
196264	MPZL3	S45	M40	L25	0.993	0.932	0.653	28.276	27.088
116534	MRGPRE	S2	M6	L7	0.83	1	0.995	56.761	68.411
259249	MRGPRX1	S302	M214	L123	1	0.805	0.905	-23.818	51.408
117195	MRGPRX3	S104	M23	L3	0.89	0.879	0.892	-17.082	43.148
55178	MRM3	S643	M3	L1	0.361	0.995	0.905	-27.676	-45.122
124995	MRPL10	S18	M12	L1	1	0.84	0.994	4.514	-89.796
65003	MRPL11	S43	M12	L1	0.8	1	0.994	-6.672	-82.472
6182	MRPL12	S13	M17	L2	1	0.945	0.994	-61.394	-22.906
28998	MRPL13	S18	M12	L1	1	0.84	0.994	2.807	-90.235
29088	MRPL15	S18	M12	L1	1	0.84	0.994	3.195	-89.961
29074	MRPL18	S18	M12	L1	1	0.84	0.994	4.949	-90.913
55052	MRPL20	S43	M12	L1	0.82	1	0.994	-3.868	-84.281
219927	MRPL21	S18	M12	L1	1	0.84	0.994	4.188	-89.494
29093	MRPL22	S31	M12	L1	0.99	0.98	0.994	-10.434	-84.61
79590	MRPL24	S167	M12	L1	0.78	0.98	0.994	-6.386	-87.064
64983	MRPL32	S31	M12	L1	0.99	0.98	0.994	-9.327	-85.193
64981	MRPL34	S43	M12	L1	0.83	1	0.994	-3.689	-82.149
51253	MRPL37	S13	M17	L2	1	0.945	0.994	-60.779	-19.653
64978	MRPL38	S9	M15	L15	1	1	1	28.537	-77.802
54148	MRPL39	S18	M12	L1	1	0.84	0.994	0.55	-88.302
51073	MRPL4	S18	M12	L1	1	0.84	0.994	4.673	-91.249
64976	MRPL40	S43	M12	L1	0.83	1	0.994	-4.368	-82.939
65080	MRPL44	S18	M12	L1	0.695	0.84	0.994	4.205	-86.777
84311	MRPL45	S9	M15	L15	1	1	1	30.873	-78.843
26589	MRPL46	S31	M12	L1	0.99	0.98	0.994	-11.14	-85.155
57129	MRPL47	S31	M12	L1	0.99	0.98	0.994	-10.184	-84.444
51258	MRPL51	S31	M12	L1	0.99	0.98	0.994	-9.299	-83.551
122704	MRPL52	S464	M12	L1	0.76	0.973	0.994	-9.65	-79.371
3396	MRPL58	S18	M12	L1	1	0.84	0.994	-0.647	-87.985
55173	MRPS10	S18	M12	L1	1	0.84	0.994	1.847	-88.234
64963	MRPS11	S18	M12	L1	1	0.84	0.994	1.246	-86.743
63931	MRPS14	S43	M12	L1	0.805	1	0.994	-1.619	-83.361
64960	MRPS15	S167	M12	L1	0.78	0.98	0.994	-5.593	-86.906
55168	MRPS18A	S43	M12	L1	0.805	1	0.994	-0.229	-83.423
51116	MRPS2	S167	M12	L1	0.78	0.98	0.994	-4.663	-86.579
54460	MRPS21	S125	M4	L6	0.625	1	1	100.291	2.706
56945	MRPS22	S43	M12	L1	0.805	1	0.994	-2.135	-83.924
64951	MRPS24	S43	M12	L1	0.805	1	0.994	-1.014	-83.125
28957	MRPS28	S18	M12	L1	1	0.84	0.994	-2.115	-86.711
10240	MRPS31	S31	M12	L1	0.99	0.98	0.994	-11.711	-87.296
51650	MRPS33	S167	M12	L1	0.78	0.98	0.994	-5.388	-86.734
65993	MRPS34	S18	M12	L1	1	0.84	0.994	4.214	-88.884
60488	MRPS35	S31	M12	L1	0.99	0.98	0.994	-12.48	-85.506
64969	MRPS5	S18	M12	L1	1	0.84	0.994	2.882	-88.561
51081	MRPS7	S43	M12	L1	0.791	0.941	0.983	-4.779	-83.122
64965	MRPS9	S18	M12	L1	1	0.84	0.994	-1.504	-86.885
57496	MRTFB	S429	M327	L3	0.985	0.515	0.528	3.224	71.779
51154	MRTO4	S21	M10	L2	1	0.995	0.99	-54.24	-2.66
51338	MS4A4A	S127	M121	L83	0.98	0.944	0.815	-53.851	28.548
58475	MS4A7	S152	M55	L2	1	0.935	0.615	-75.614	41.324
91283	MSANTD3	S303	M2	L1	0.64	0.898	1	-46.507	-72.383
4481	MSR1	S403	M27	L14	0.595	0.667	0.396	14.157	81.921
22921	MSRB2	S46	M65	L46	0.995	0.995	0.995	86.04	18.231
55154	MSTO1	S1	M8	L8	0.979	1	1	77.342	-49.759
4495	MT1G	S3	M3	L1	0.964	0.985	0.905	-28.978	-55.62
27085	MTBP	S1	M8	L8	1	1	1	76.534	-55.318
23788	MTCH2	S434	M10	L2	0.72	0.958	0.99	-50.387	-2.696
92140	MTDH	S741	M2	L1	0.467	0.55	0.969	-58.249	-61.144
4522	MTHFD1	S29	M33	L17	1	1	0.96	6.921	-41.643
64779	MTHFSD	S742	M7	L4	0	0.875	0.96	43.985	16.981
55613	MTMR8	S743	M27	L14	0.323	0.516	0.635	3.802	86.213
2475	MTOR	S46	M65	L46	1	1	1	82.869	19.973
23517	MTREX	S268	M14	L11	0.65	0.909	0.65	63.869	-11.206
54516	MTRF1L	S31	M12	L1	0.99	0.98	0.994	-10.794	-82.869
4582	MUC1	S154	M87	L4	0.98	0.879	0.924	57.865	19.849
118430	MUCL1	S5	M7	L4	0.937	1	0.96	45.428	23.448
255275	MYADML2	S3	M3	L1	0.908	0.995	0.905	-21.427	-51.643
4602	MYB	S242	M184	L45	1	0.985	0.4	-22.422	-8.215
10514	MYBBP1A	S268	M14	L11	0.65	0.909	0.65	64.035	-12.276
4603	MYBL1	S136	M125	L82	1	0.96	0.875	8.548	85.721
4605	MYBL2	S63	M25	L3	1	0.995	0.894	-5.227	12.007
4609	MYC	S175	M155	L45	1	0.99	0.335	-22.067	-4.58
4613	MYCN	S455	M113	L39	1	0.848	0.595	0.011	76.32
4615	MYD88	S136	M125	L82	1	0.96	0.875	9.501	85.341
4622	MYH4	S6	M11	L4	0.606	0.76	0.96	50.845	-2.734
4626	MYH8	S3	M3	L1	0.98	0.995	0.905	-21.348	-58.78
4627	MYH9	S263	M241	L130	1	1	0.995	24.114	-32.345
93408	MYL10	S137	M25	L3	0.98	0.834	0.894	-11.284	8.776
10627	MYL12A	S263	M241	L130	1	1	0.995	24.919	-32.545
103910	MYL12B	S263	M241	L130	1	1	0.995	23.9	-32.294
399687	MYO18A	S226	M1	L2	0.715	0.915	1	-76.727	11.065
4646	MYO6	S3	M3	L1	0.98	0.995	0.905	-22.287	-57.161
4648	MYO7B	S2	M6	L7	0.835	1	0.995	57.169	64.513
4650	MYO9B	S48	M27	L14	0.695	0.965	0.566	11.841	48.556
4654	MYOD1	S335	M218	L3	1	0.965	0.821	-17.653	10.638
8736	MYOM1	S380	M24	L3	0.635	1	0.533	0.264	68.823
91977	MYOZ3	S149	M49	L3	0.89	0.53	0.668	-23.266	13.567
25924	MYRIP	S86	M2	L1	0.475	0.962	1	-55.939	-77.57
4661	MYT1	S23	M22	L16	1	1	0.935	-24.442	73.857
51237	MZB1	S318	M3	L1	0.615	0.995	0.905	-29.168	-52.91
7593	MZF1	S21	M10	L2	0.77	0.915	0.99	-53.849	7.916
55728	N4BP2	S323	M227	L2	0.985	0.815	0.827	-79.779	33.551
8260	NAA10	S553	M390	L199	1	1	0.96	71.34	-16.849
84779	NAA11	S169	M52	L38	1	1	0.87	44.1	69.95
80155	NAA15	S553	M390	L199	1	1	0.96	71.381	-16.838
60560	NAA35	S223	M169	L78	0.705	0.62	0.355	26.225	-10.68
84316	NAA38	S404	M304	L140	1	1	1	-69.219	68.038
79829	NAA40	S366	M7	L4	0.755	0.537	0.96	61.152	22.587
80218	NAA50	S40	M48	L30	1	1	0.97	43.657	-35.602
4664	NAB1	S744	M26	L3	0.542	0.556	0.435	15.26	43.077
4666	NACA	S65	M32	L19	1	1	0.236	21.309	52.461
342538	NACA2	S255	M107	L11	0.99	0.414	0.643	66.279	-27.42
23148	NACAD	S199	M21	L3	0.57	0.963	0.918	-11.255	32.828
8883	NAE1	S151	M148	L51	1	0.71	0.245	15.555	3.563
92345	NAF1	S237	M9	L1	0.595	0.543	1	-27.479	-79.613
10135	NAMPT	S42	M53	L3	0.952	1	0.421	41.26	52.227
8775	NAPA	S477	M1	L2	0.515	0.929	0.995	-73.284	29.914
4677	NARS	S581	M415	L185	1	1	0.98	97.511	9.695
79731	NARS2	S471	M15	L15	0.93	0.969	1	26.681	-75.06
9	NAT1	S147	M1	L2	0.655	0.759	1	-82.195	-8.91
55226	NAT10	S17	M14	L11	0.989	0.925	0.65	58.203	-15.318
57106	NAT14	S2	M6	L7	1	1	0.995	64.52	68.524
9027	NAT8	S174	M157	L3	1	0.949	0.791	10.381	30.389
26960	NBEA	S259	M130	L3	1	0.93	0.228	-8.247	66.662
23310	NCAPD3	S396	M297	L165	1	1	0.835	59.106	-53.3
64151	NCAPG	S204	M8	L8	0.54	1	1	81.176	-60.989
54892	NCAPG2	S396	M297	L165	1	1	0.835	58.779	-53.469
23397	NCAPH	S597	M392	L73	0.685	0.68	0.865	62.027	-50.053
4686	NCBP1	S282	M86	L62	0.995	1	0.855	32.95	10.798
22916	NCBP2	S78	M88	L21	1	1	0.88	20.916	-15.22
55421	NCBP3	S127	M121	L83	0.995	0.939	0.719	-56.085	25.212
23154	NCDN	S241	M9	L1	0.785	0.514	1	-39.568	-82.536
57552	NCEH1	S106	M10	L2	0.945	0.658	0.974	-47.797	1.249
653361	NCF1	S406	M300	L2	1	0.905	0.994	-60.748	24.883
10787	NCKAP1	S248	M13	L9	0.51	1	0.945	87.741	34.62
4691	NCL	S215	M200	L11	0.99	0.59	0.67	60.335	-22.058
56926	NCLN	S13	M17	L2	0.865	0.945	0.994	-57.705	-16.492
8031	NCOA4	S68	M77	L20	1	1	0.425	13.471	-46.43
23054	NCOA6	S295	M46	L3	0.565	0.925	0.669	8.388	76.422
9611	NCOR1	S336	M113	L39	0.99	0.965	0.62	0.879	73.893
9612	NCOR2	S201	M181	L114	1	1	0.58	30.786	95.062
55706	NDC1	S607	M424	L176	1	0.995	0.575	15.535	-54.543
10403	NDC80	S1	M8	L8	1	1	1	77.425	-54.984
10397	NDRG1	S329	M74	L33	0.91	0.97	0.875	26.679	6.005
65009	NDRG4	S109	M2	L1	0.975	0.522	1	-43.291	-75.607
3340	NDST1	S745	M471	L2	0	0	0.721	-74.347	22.63
4694	NDUFA1	S383	M60	L2	0.815	0.464	0.974	-64.286	8.647
4705	NDUFA10	S13	M17	L2	1	0.945	0.994	-59.11	-22.479
126328	NDUFA11	S137	M25	L3	0.98	0.834	0.894	-12.14	8.01
55967	NDUFA12	S4	M1	L2	0.625	0.695	0.985	-71.13	13.769
4696	NDUFA3	S587	M417	L170	1	1	0.965	-18.912	53.079
56901	NDUFA4L2	S4	M1	L2	0.995	1	1	-73.369	20.264
4698	NDUFA5	S35	M1	L2	0.622	0.969	1	-70.841	18.132
4704	NDUFA9	S13	M17	L2	1	0.945	0.994	-59.391	-22.756
4706	NDUFAB1	S180	M188	L2	0.947	0.61	0.995	-60.163	-11.36
4716	NDUFB10	S13	M17	L2	1	0.945	0.994	-60.483	-18.049
4711	NDUFB5	S9	M15	L15	1	1	1	28.581	-78.273
4713	NDUFB7	S13	M17	L2	1	0.945	0.994	-60.761	-20.529
4714	NDUFB8	S538	M370	L177	1	1	1	109.583	-9.591
4715	NDUFB9	S746	M472	L2	0.718	0.342	0.638	-56.274	30.35
4720	NDUFS2	S13	M17	L2	1	0.945	0.994	-58.107	-19.029
4722	NDUFS3	S13	M17	L2	0.655	0.915	0.972	-63.641	-20.935
4724	NDUFS4	S424	M321	L2	1	0.96	0.979	-83.145	-15.382
4725	NDUFS5	S680	M436	L207	1	1	1	23.321	-85.004
374291	NDUFS7	S9	M15	L15	1	1	1	29.748	-80.172
4723	NDUFV1	S9	M15	L15	1	1	1	28.318	-79.749
121441	NEDD1	S157	M144	L81	1	1	0.79	55.424	-29.673
4738	NEDD8	S151	M148	L51	1	0.71	0.245	14.951	4.794
4744	NEFH	S243	M205	L61	0.99	0.87	0.495	-84.053	41.838
4751	NEK2	S484	M283	L33	0.985	0.48	0.429	6.52	61.05
284086	NEK8	S232	M7	L4	0.515	0.444	0.96	56.066	13.519
7469	NELFA	S212	M194	L7	0.682	0.673	0.874	54.611	57.557
25920	NELFB	S122	M94	L67	1	0.955	0.63	-60.693	-50.531
7936	NELFE	S56	M64	L44	0.995	1	0.77	14.66	-29.728
10825	NEU3	S4	M1	L2	1	1	1	-80.359	17.69
84461	NEURL4	S747	M473	L31	0	0.46	0.449	-41.337	38.596
4780	NFE2L2	S65	M32	L19	1	1	0.236	24.151	50.209
4790	NFKB1	S595	M159	L96	0.965	0.994	0.963	-19.931	-28.68
4798	NFRKB	S463	M318	L167	1	1	1	119.49	27.182
9054	NFS1	S609	M391	L1	1	0.825	0.888	-7.585	-48.206
4802	NFYC	S16	M4	L6	0.555	1	1	91.652	-2.091
58157	NGB	S372	M280	L151	1	1	0.864	-13.304	2.665
25791	NGEF	S14	M16	L13	0.77	1	1	60.805	-63.497
55651	NHP2	S21	M10	L2	1	0.995	0.99	-53.764	-2.092
22795	NID2	S77	M5	L5	0.968	0.949	0.995	-28.9	39.858
84365	NIFK	S17	M14	L11	0.895	0.925	0.65	63.837	-19.127
51388	NIP7	S217	M185	L106	1	1	0.805	9.698	-72.351
25836	NIPBL	S142	M134	L89	1	1	1	5.504	-63.355
2631	NIPSNAP2	S6	M11	L4	0.991	0.755	0.96	55.484	3.434
79576	NKAP	S602	M409	L1	0.92	0.503	0.722	-22.144	-86.405
28512	NKIRAS1	S748	M39	L3	0.38	0.237	0.53	15.988	63.091
26257	NKX2-8	S74	M5	L5	0.86	0.975	0.99	-28.646	46.578
54475	NLE1	S6	M11	L4	0.99	0.755	0.96	54.277	-2.405
57502	NLGN4X	S54	M30	L3	1	0.96	0.697	-6.977	59.806
57486	NLN	S245	M223	L39	0.975	0.475	0.495	-2.889	73.04
22861	NLRP1	S321	M220	L1	1	0.98	1	-45.036	-52.026
91662	NLRP12	S32	M19	L3	1	0.965	0.96	3.711	30.29
51068	NMD3	S1	M8	L8	0.939	1	1	79.803	-49.884
4831	NME2	S211	M191	L73	1	0.965	0.48	21.165	11.015
8382	NME5	S5	M7	L4	0.827	0.985	0.96	41.983	28.243
51314	NME8	S407	M1	L2	0.93	0.764	1	-78.553	-10.249
347736	NME9	S439	M302	L2	0.86	0.33	0.99	-77.026	-4.114
54981	NMRK1	S366	M7	L4	0.755	0.537	0.96	60.783	21.982
27231	NMRK2	S645	M413	L191	1	1	0.68	66.679	4.752
4836	NMT1	S47	M29	L3	0.794	0.965	0.81	-2.415	44.987
23530	NNT	S277	M70	L5	0.82	0.724	0.824	-35.12	60.005
26155	NOC2L	S6	M11	L4	1	0.755	0.96	54.582	-3.738
79050	NOC4L	S41	M9	L1	0.68	0.533	1	-26.697	-82.171
25819	NOCT	S165	M136	L90	0.96	0.98	0.91	-43.856	19.454
25926	NOL11	S2	M6	L7	1	1	0.995	69.283	70.828
140688	NOL4L	S419	M316	L141	1	1	0.725	-32.927	-42.193
65083	NOL6	S41	M9	L1	0.575	0.508	1	-27.454	-82.096
51406	NOL7	S41	M9	L1	0.41	0.528	1	-24.182	-86.035
55035	NOL8	S481	M295	L59	0.97	0.875	0.415	-11.856	-66.712
79707	NOL9	S14	M16	L13	1	1	1	53.852	-60.597
9221	NOLC1	S30	M36	L2	0.956	0.67	0.959	-50.362	6.34
64434	NOM1	S6	M11	L4	0.969	0.632	0.915	56.848	-11.783
23420	NOMO1	S348	M272	L4	0.995	0.44	0.949	53.701	28.992
4841	NONO	S382	M52	L38	0.64	1	0.87	44.945	66.677
51491	NOP16	S11	M4	L6	0.813	1	1	92.582	-12.803
4839	NOP2	S173	M9	L1	0.9	0.537	1	-22.18	-90.327
29997	NOP53	S17	M14	L11	0.895	0.925	0.65	63.867	-18.121
10528	NOP56	S1	M8	L8	0.925	1	1	72.418	-52.507
51602	NOP58	S628	M402	L8	0.72	0.615	0.99	70.702	-51.623
161424	NOP9	S1	M8	L8	0.979	1	1	81.165	-52.504
4854	NOTCH3	S358	M38	L24	0.91	0.994	0.655	13.946	15.406
4857	NOVA1	S30	M36	L2	1	0.73	0.99	-49.841	10.289
122945	NOXRED1	S97	M57	L1	1	0.451	0.95	-25.355	-75.477
4863	NPAT	S396	M297	L165	1	1	0.835	58.263	-53.615
2832	NPBWR2	S341	M20	L3	0.554	0.636	0.53	18.345	72.916
56654	NPDC1	S2	M6	L7	1	1	0.995	66.344	67.866
9520	NPEPPS	S275	M211	L134	1	1	1	15.569	-61.252
55666	NPLOC4	S1	M8	L8	1	1	1	74.154	-55.82
4869	NPM1	S444	M107	L11	0.97	0.735	0.66	61.226	-25.206
10361	NPM2	S267	M9	L1	0.515	0.494	1	-34.749	-84.627
4882	NPR2	S72	M21	L3	0.836	0.642	0.914	-7.733	22.233
27020	NPTN	S8	M5	L5	0.912	1	0.995	-38.802	50.708
4884	NPTX1	S8	M5	L5	0.902	1	0.995	-36.082	49.97
23467	NPTXR	S110	M112	L66	1	1	0.665	-24.644	0.076
64111	NPVF	S10	M1	L2	0.988	0.694	0.98	-89.02	-6.119
2908	NR3C1	S77	M5	L5	0.985	0.941	0.995	-28.944	38.075
[truncated: 1,622 more rows]

## Sheet: S80_C20
EntrezID	GeneSymbol	Cluster_Small	Cluster_Medium	Cluster_Large	Prob_Small	Prob_Medium	Prob_Large	tSNE_x	tSNE_y
8086	AAAS	S925	M484	L236	1	1	0.795	-86.789	45.394
13	AADAC	S941	M462	L227	0.95	1	0.87	-113.959	-16.859
14	AAMP	S6	M4	L3	1	0.805	0.995	-24.978	-16.134
16	AARS	S80	M1	L5	0.98	0.582	1	-104.038	24.052
57505	AARS2	S15	M15	L8	1	0.995	0.731	62.567	66.009
26574	AATF	S55	M54	L3	0.98	0.515	0.595	-37.314	35.273
9625	AATK	S858	M621	L234	1	1	0.99	31.929	-9.467
19	ABCA1	S11	M8	L6	0.995	1	0.99	16.621	-15.487
23456	ABCB10	S8	M9	L6	0.79	0.915	0.99	9.772	-32.255
8647	ABCB11	S31	M51	L3	1	0.925	0.51	-49.576	-27.437
340273	ABCB5	S66	M85	L17	0.995	0.985	0.609	-53.656	-4.891
22	ABCB7	S581	M440	L217	1	0.99	0.82	-63.221	57.058
23457	ABCB9	S181	M136	L83	0.949	0.979	0.922	-55.209	6.599
8714	ABCC3	S478	M295	L172	1	1	0.99	-67.7	30.266
215	ABCD1	S415	M335	L183	1	0.98	0.318	-43.037	16.737
6059	ABCE1	S183	M4	L3	0.46	0.93	1	-18.908	-27.327
23	ABCF1	S580	M123	L76	1	1	0.93	-56.85	17.8
9619	ABCG1	S10	M11	L11	0.37	0.92	0.955	-35.698	63.002
55347	ABHD10	S47	M61	L24	0.99	0.99	0.775	35.993	-70.725
26090	ABHD12	S956	M642	L305	0	0	0	71.306	-27.131
84945	ABHD13	S37	M10	L10	0.541	0.985	0.945	-82.794	-0.843
10006	ABI1	S658	M393	L10	0.995	0.72	0.91	-82.076	-11.659
29777	ABT1	S84	M8	L6	0.515	0.995	0.99	16.527	-11.045
31	ACACA	S604	M404	L221	1	1	0.935	-3.471	87.998
32	ACACB	S163	M145	L57	0.98	0.91	0.445	-9.8	-79.907
80724	ACAD10	S527	M395	L208	0.95	0.91	0.875	31.999	74.414
84129	ACAD11	S733	M499	L3	0.995	0.975	0.379	-21.345	25.462
28976	ACAD9	S128	M19	L8	1	0.995	0.769	49.096	65.303
35	ACADS	S560	M364	L3	0.54	0.8	0.365	-42.069	-66.458
22985	ACIN1	S820	M579	L21	1	0.775	0.985	23.209	37.011
51554	ACKR4	S43	M46	L3	0.859	0.908	0.454	-49.632	-22.972
47	ACLY	S604	M404	L221	0.995	0.99	0.93	-2.528	87.392
50	ACO2	S549	M410	L16	1	1	0.956	7.7	80.89
26027	ACOT11	S204	M31	L4	0.515	0.968	0.503	-42.284	6.743
10005	ACOT8	S446	M358	L1	0.985	0.945	0.601	55.53	-22.759
8310	ACOX3	S957	M643	L9	0.531	0	0.973	-81.516	-31.731
390928	ACP7	S322	M268	L138	1	1	0.855	29.435	-2.997
55	ACPP	S958	M644	L118	0.65	0.57	0.265	-15.36	-69.219
49	ACR	S422	M342	L181	1	1	0.81	62.721	-17.984
2181	ACSL3	S140	M115	L77	0.984	0.995	0.905	9.193	-82.205
2182	ACSL4	S159	M42	L20	0.935	0.685	0.42	-13.72	-8.345
142827	ACSM6	S2	M5	L7	0.54	1	1	-49.819	70.962
84532	ACSS1	S153	M72	L1	0.84	0.889	0.954	30.36	-36.783
60	ACTB	S384	M47	L17	0.645	0.735	0.553	-44.22	-6.749
345651	ACTBL2	S5	M2	L2	0.429	0.99	1	90.276	27.416
71	ACTG1	S384	M47	L17	0.645	0.735	0.553	-43.93	-6.306
72	ACTG2	S384	M47	L17	0.645	0.735	0.553	-43.99	-6.424
86	ACTL6A	S92	M107	L33	0.995	0.99	0.855	-19.279	53.638
10881	ACTL7A	S63	M34	L1	0.98	0.48	0.995	45.702	-27.804
87	ACTN1	S457	M314	L1	1	0.94	0.973	66.109	-69.426
55860	ACTR10	S726	M546	L2	0.995	0.85	0.983	77.006	-7.727
10121	ACTR1A	S627	M400	L205	0.98	0.905	0.615	90.691	4.285
10097	ACTR2	S94	M105	L61	1	1	0.79	-85.409	-15.385
10096	ACTR3	S94	M105	L61	1	1	0.79	-86.074	-14.076
79913	ACTR5	S434	M17	L4	0.88	0.57	0.533	-12.615	11.609
64431	ACTR6	S92	M107	L33	0.995	0.99	0.855	-19.584	52.72
93973	ACTR8	S312	M258	L140	1	1	1	-99.598	-68.21
95	ACY1	S17	M13	L1	0.701	0.795	0.985	42.527	-39.494
2515	ADAM2	S832	M480	L1	0.83	0.605	0.976	57.049	-63.949
8745	ADAM23	S38	M39	L27	0.894	0.907	0.635	-10.019	-55.886
11085	ADAM30	S561	M423	L3	0.925	0.875	0.889	-40.484	-25.501
27299	ADAMDEC1	S350	M275	L189	0.995	0.95	0.595	71.601	-71.499
9510	ADAMTS1	S760	M41	L1	0.635	0.542	1	63.51	-50.751
81794	ADAMTS10	S280	M229	L148	1	0.99	0.775	-49.399	26.412
81792	ADAMTS12	S124	M14	L1	0.925	0.448	1	66.692	-56.067
80070	ADAMTS20	S812	M46	L3	0.695	0.954	0.414	-36.142	-4.574
11033	ADAP1	S6	M4	L3	0.919	0.805	0.995	-27.208	-18.346
103	ADAR	S728	M609	L55	1	1	0.944	12.085	57.388
134637	ADAT2	S20	M1	L5	0.725	0.99	1	-96.146	35.566
113179	ADAT3	S51	M1	L5	0.58	1	1	-90.179	32.651
112	ADCY6	S644	M134	L10	0.885	0.605	0.651	-74.572	-22.052
117	ADCYAP1R1	S52	M3	L1	0.935	0.975	1	61.495	-61.612
25960	ADGRA2	S124	M14	L1	0.94	0.451	1	64.977	-54.15
576	ADGRB2	S418	M3	L1	0.935	0.598	0.98	60.985	-58.539
283383	ADGRD1	S267	M14	L1	0.787	0.597	1	75.135	-51.043
221393	ADGRF4	S837	M597	L1	0.915	0.7	0.956	54.882	-77.636
139378	ADGRG4	S125	M3	L1	0.58	0.94	1	53.433	-71.2
84873	ADGRG7	S165	M148	L1	0.965	0.52	0.99	35.972	-42.2
125	ADH1B	S122	M38	L12	0.427	0.634	0.42	-53.33	-57.747
127	ADH4	S90	M57	L4	1	0.473	0.525	-5.67	0.294
128	ADH5	S852	M495	L4	1	0.905	0.265	-1.227	2.913
23394	ADNP	S112	M114	L68	1	1	0.775	0.21	34.516
135	ADORA2A	S68	M66	L38	1	1	0.985	38.598	-5.719
83440	ADPGK	S29	M40	L15	1	1	0.635	-54.288	-40.382
146	ADRA1D	S959	M29	L3	0.515	0.265	0.405	-20.478	-72.64
11047	ADRM1	S88	M23	L14	0.82	0.889	0.794	-23.216	38.184
158	ADSL	S24	M24	L16	1	1	1	5.332	84.627
159	ADSS	S24	M24	L16	1	1	1	5.886	87.48
84830	ADTRP	S951	M37	L4	0.805	0.685	0.528	-16.766	16.025
4301	AFDN	S37	M10	L10	0.755	0.985	0.945	-78.01	0.836
27125	AFF4	S68	M66	L38	0.682	0.705	0.698	33.676	-65.253
10939	AFG3L2	S13	M19	L8	1	0.55	0.769	47.778	71.078
175	AGA	S125	M3	L1	0.573	0.935	1	54.768	-73.499
414189	AGAP6	S744	M507	L2	0.98	0.735	0.93	78.724	36.513
3268	AGFG2	S289	M231	L92	0.995	0.965	0.77	0.468	-31.931
178	AGL	S324	M218	L130	1	0.985	0.825	42.336	-74.496
27161	AGO2	S501	M373	L36	0.995	0.725	0.762	-70.846	53.943
10554	AGPAT1	S144	M1	L5	0.879	0.986	0.995	-93.513	42.822
56894	AGPAT3	S105	M65	L1	0.722	0.721	0.66	36.761	-24.219
183	AGT	S347	M271	L43	0.848	0.525	0.524	16.904	55.797
25909	AHCTF1	S129	M45	L4	0.995	0.945	0.301	2.875	-2.12
191	AHCY	S24	M24	L16	1	1	1	6.223	84.543
10768	AHCYL1	S206	M186	L104	0.995	0.995	1	7.87	74.423
79026	AHNAK	S203	M181	L2	0.992	0.814	0.693	86.443	39.616
196	AHR	S808	M620	L255	1	1	1	20.088	103.999
57491	AHRR	S960	M645	L3	0.78	0	0.476	-13.318	-52.541
64853	AIDA	S766	M44	L2	0.925	0.532	1	73.203	17.844
9131	AIFM1	S6	M4	L3	0.919	0.805	0.995	-28.233	-18.307
51390	AIG1	S27	M32	L26	0.975	0.975	0.935	-30.117	-93.457
9447	AIM2	S509	M435	L1	0.87	0.66	0.985	57.246	-46.274
7965	AIMP2	S446	M358	L1	0.985	0.945	0.601	55.557	-23.147
84962	AJUBA	S195	M168	L6	1	0.66	0.975	25.585	-26.265
205	AK4	S68	M66	L38	1	1	0.985	37.626	-6.828
8165	AKAP1	S609	M242	L6	0.995	0.88	0.936	-38.195	-53.373
10327	AKR1A1	S140	M115	L77	0.632	0.611	0.587	8.498	-85.1
1646	AKR1C2	S362	M70	L3	0.76	0.323	0.465	-39.534	-65.301
22977	AKR7A3	S87	M103	L4	0.975	0.58	0.543	-26.49	16.896
207	AKT1	S81	M36	L23	0.545	1	1	-52.197	42.538
208	AKT2	S81	M36	L23	0.545	1	1	-54.104	41.739
5832	ALDH18A1	S74	M49	L28	0.86	0.86	0.605	-1.929	78.438
8854	ALDH1A2	S413	M333	L186	1	0.995	0.61	-60.971	-62.059
217	ALDH2	S282	M232	L150	1	0.99	0.66	-23.619	-78.035
226	ALDOA	S170	M146	L74	1	1	0.995	-74.28	-84.268
230	ALDOC	S158	M141	L3	0.622	0.548	0.737	-35.418	-18.872
56052	ALG1	S89	M1	L5	0.553	0.99	1	-101.948	31.242
144245	ALG10B	S282	M232	L150	0.955	0.985	0.653	-22.832	-79.388
440138	ALG11	S2	M5	L7	0.964	1	1	-48.681	81.067
79087	ALG12	S600	M1	L5	0.715	0.966	1	-93.431	20.021
79868	ALG13	S255	M1	L5	0.89	0.899	1	-95.853	23.832
200810	ALG1L	S14	M1	L5	0.975	1	1	-97.192	28.78
85365	ALG2	S19	M1	L5	0.84	0.98	1	-86.956	23.699
29880	ALG5	S29	M40	L15	1	1	0.635	-54.363	-42.306
59344	ALOXE3	S862	M113	L4	0.795	0.543	0.52	-16.215	4.987
10189	ALYREF	S215	M191	L97	1	1	0.65	17.572	29.44
55626	AMBRA1	S166	M149	L3	0.985	0.96	0.963	-3.125	5.982
262	AMD1	S74	M49	L28	1	1	0.66	-0.882	79.873
139285	AMER1	S216	M4	L3	0.812	0.472	0.802	-22.819	-25.844
9949	AMMECR1	S126	M80	L46	0.97	1	0.915	56.559	23.417
154796	AMOT	S577	M16	L8	0.955	0.653	0.694	66.712	42.657
270	AMPD1	S684	M8	L6	0.577	0.523	0.975	23.609	-15.02
272	AMPD3	S79	M8	L6	0.93	0.714	0.99	11.216	-22.476
64682	ANAPC1	S99	M30	L3	0.635	0.49	1	-37.398	-29.387
10393	ANAPC10	S14	M1	L5	0.545	0.889	1	-101.717	40.07
51529	ANAPC11	S339	M237	L136	1	1	0.995	58.463	17.196
25906	ANAPC15	S874	M473	L291	0.595	0.517	0.372	56.186	4.026
29882	ANAPC2	S19	M1	L5	0.84	0.98	1	-87.932	25.725
29945	ANAPC4	S146	M126	L19	1	0.995	0.585	38.417	15.493
51433	ANAPC5	S146	M126	L19	1	0.995	0.585	38.859	15.582
283	ANG	S3	M3	L1	0.82	0.816	1	54.517	-63.137
90806	ANGEL2	S204	M31	L4	0.52	0.984	0.517	-41.357	6.226
51378	ANGPT4	S331	M152	L1	0.725	0.415	0.99	50.17	-24.539
253935	ANGPTL5	S621	M428	L11	0.985	0.6	0.949	-28.242	53.313
10218	ANGPTL7	S1	M6	L2	0.927	0.965	1	93.314	-4.102
162282	ANKFN1	S3	M3	L1	0.984	0.995	1	53.534	-54.482
56172	ANKH	S59	M43	L4	0.985	0.86	0.545	-8.864	7.905
23141	ANKLE2	S98	M95	L58	1	1	1	44.738	-100.694
29123	ANKRD11	S718	M514	L94	1	0.88	0.609	-97.671	-35.218
26057	ANKRD17	S291	M20	L13	0.965	0.515	0.895	-9.582	53.907
118932	ANKRD22	S246	M127	L81	0.737	0.77	0.593	85.406	1.759
170961	ANKRD24	S566	M10	L10	0.5	1	0.95	-75.695	-8.992
256006	ANKRD31	S4	M7	L9	0.995	1	1	-81.068	-41.306
390616	ANKRD34C	S1	M6	L2	0.733	0.918	1	88.976	-13.959
57730	ANKRD36B	S98	M95	L58	1	1	1	43.676	-100.936
54851	ANKRD49	S401	M325	L3	0.88	0.595	0.565	-47.246	35.692
100287718	ANKRD66	S1	M6	L2	0.962	0.965	1	90.703	-10.826
23294	ANKS1A	S546	M407	L88	0.99	0.93	0.442	-78.687	-56.58
54443	ANLN	S94	M105	L61	0.872	0.969	0.779	-82.809	-17.631
10541	ANP32B	S343	M212	L3	0.98	0.465	0.545	9.605	9.913
81611	ANP32E	S46	M58	L35	0.725	0.725	0.725	-65.873	23.602
84168	ANTXR1	S606	M142	L3	0.595	0.314	0.352	-44.147	-13.312
310	ANXA7	S683	M477	L6	0.995	0.86	0.555	24.516	-13.062
8416	ANXA9	S496	M457	L198	0.985	0.875	0.59	25.965	-9.142
55435	AP1AR	S906	M526	L2	0.798	0.627	0.97	79.297	11.899
162	AP1B1	S56	M79	L1	0.985	0.715	0.99	41.795	-49.66
8906	AP1G2	S456	M84	L4	0.995	0.74	0.455	-7.185	31.657
10053	AP1M2	S39	M27	L2	0.874	0.935	0.99	77.242	5.319
1174	AP1S1	S34	M20	L13	0.954	1	0.92	-0.745	53.249
163	AP2B1	S665	M11	L11	0.75	0.563	0.663	-37.326	64.142
1173	AP2M1	S74	M49	L28	1	1	0.66	-3.347	79.972
1175	AP2S1	S74	M49	L28	1	1	0.66	-3.66	80.34
8546	AP3B1	S20	M1	L5	0.328	0.985	1	-95.324	27.003
320	APBA1	S428	M72	L1	0.8	0.928	0.893	28.617	-33.917
324	APC	S149	M132	L4	1	0.93	0.379	-17.873	20.371
10297	APC2	S713	M556	L3	0.7	0.366	0.939	-32.852	-29.821
27301	APEX2	S370	M28	L21	0.99	1	0.96	18.204	44.916
8539	API5	S154	M1	L5	0.985	0.82	1	-98.81	17.57
336	APOA2	S7	M4	L3	0.985	0.975	0.902	-21.673	-38.156
200316	APOBEC3F	S125	M3	L1	0.562	0.93	1	50.848	-72.797
347	APOD	S44	M23	L14	1	1	0.855	-24.507	42.202
348	APOE	S1	M6	L2	0.933	0.96	1	90.149	-9.326
8542	APOL1	S361	M2	L2	0.935	0.669	1	99.438	9.979
23780	APOL2	S33	M48	L1	0.958	0.724	0.995	52.147	-46.497
353	APRT	S60	M77	L32	0.985	0.965	0.865	-43.8	-42.925
364	AQP7	S670	M1	L5	0.455	0.97	1	-93.403	24.979
9716	AQR	S100	M3	L1	0.99	0.864	1	48.614	-51.725
372	ARCN1	S531	M3	L1	0.495	0.929	1	44.373	-65.724
9870	AREL1	S667	M392	L15	1	0.975	0.64	-56.192	-46.2
375	ARF1	S568	M432	L10	1	0.965	0.834	-65.85	-13.954
377	ARF3	S62	M25	L4	0.975	0.9	0.513	-35.508	12.126
378	ARF4	S131	M33	L22	1	1	0.98	-60.433	34.2
55738	ARFGAP1	S117	M117	L4	0.927	0.75	0.467	-47.003	9.417
27236	ARFIP1	S78	M56	L6	0.99	0.65	0.975	24.585	-19.071
10139	ARFRP1	S65	M8	L6	0.724	0.98	0.99	8.743	-16.32
503582	ARGFX	S2	M5	L7	0.78	1	1	-41.258	82.495
55082	ARGLU1	S433	M352	L175	1	1	1	33.152	90.443
79658	ARHGAP10	S196	M110	L12	0.983	0.955	0.29	-33.731	-47.734
84986	ARHGAP19	S712	M483	L267	0.995	0.995	1	25.999	81.552
58504	ARHGAP22	S167	M55	L4	0.895	0.728	0.503	-31.412	6.738
201176	ARHGAP27	S376	M76	L4	0.985	0.57	0.535	0.122	9.666
9411	ARHGAP29	S334	M209	L117	0.445	0.635	0.327	46.827	8.548
158763	ARHGAP36	S7	M4	L3	0.984	0.995	1	-26.012	-37.301
393	ARHGAP4	S212	M24	L16	0.99	0.535	1	10.111	88.272
23526	ARHGAP45	S225	M173	L49	0.952	0.59	0.475	-27.402	29.679
394	ARHGAP5	S889	M474	L3	0.74	0.5	0.411	-13.412	-19.053
64333	ARHGAP9	S231	M194	L103	1	1	1	-70.414	15.384
398	ARHGDIG	S300	M244	L6	1	0.935	0.955	30.061	-19.2
9181	ARHGEF2	S54	M75	L40	1	1	0.965	13.868	-72.789
100271715	ARHGEF33	S379	M81	L3	0.779	0.831	0.97	-27.662	-43.411
8874	ARHGEF7	S94	M105	L61	0.898	0.995	0.8	-83.986	-16.571
8289	ARID1A	S143	M138	L85	1	0.885	0.6	1.649	-44.628
57492	ARID1B	S143	M138	L85	1	0.885	0.6	0.791	-45.126
196528	ARID2	S343	M212	L3	0.98	0.465	0.545	8.875	10.083
1820	ARID3A	S34	M20	L13	0.99	0.99	0.915	-4.362	53.603
10620	ARID3B	S237	M154	L3	0.48	0.715	0.731	-23.154	23.292
5926	ARID4A	S276	M227	L3	0.995	0.8	0.853	-9.733	-17.183
51742	ARID4B	S309	M252	L115	1	0.924	0.685	16.036	23.243
84159	ARID5B	S173	M4	L3	0.563	0.979	0.995	-23.01	-30.796
25820	ARIH1	S238	M195	L20	1	0.94	0.416	-9.414	-32.953
115761	ARL11	S6	M4	L3	0.713	0.75	0.985	-25.656	-22.442
402	ARL2	S28	M17	L4	0.749	0.777	0.52	-10.708	13.131
23568	ARL2BP	S1	M6	L2	0.672	0.95	1	95.188	-2.887
10123	ARL4C	S880	M246	L127	0.935	0.689	0.598	-5.357	32.175
379	ARL4D	S138	M25	L4	0.8	0.729	0.523	-37.414	16.723
221079	ARL5B	S97	M109	L15	1	0.95	0.405	-59.04	-16.652
390790	ARL5C	S573	M442	L3	1	0.95	0.536	-40.42	-16.62
51329	ARL6IP4	S49	M2	L2	0.763	0.526	1	81.405	18.987
55156	ARMC1	S323	M262	L137	1	0.94	0.675	-47.89	-33.585
79798	ARMC5	S327	M5	L7	0.945	0.992	1	-38.491	84.165
79637	ARMC7	S10	M11	L11	1	1	0.965	-35.395	58.039
339541	ARMH1	S264	M111	L71	1	1	0.73	-7.016	-5.964
79591	ARMH3	S432	M2	L2	0.905	0.473	1	77.013	16.831
145407	ARMH4	S203	M181	L2	0.992	0.815	0.688	87.142	40.694
405	ARNT	S808	M620	L255	1	1	1	20.087	103.998
10552	ARPC1A	S82	M31	L4	1	1	0.5	-43.103	3.634
10095	ARPC1B	S71	M90	L4	0.989	0.89	0.535	2.741	15.686
10109	ARPC2	S94	M105	L61	1	1	0.79	-86.096	-14.025
10094	ARPC3	S94	M105	L61	1	1	0.79	-85.801	-15.712
10093	ARPC4	S94	M105	L61	1	1	0.79	-85.358	-15.109
153642	ARSK	S1	M6	L2	0.958	0.965	1	92.279	-12.833
136371	ASB10	S508	M81	L3	0.81	0.337	0.862	-23.174	-43.628
142685	ASB15	S745	M4	L3	0.63	0.72	0.995	-24.16	-19.706
84164	ASCC2	S349	M286	L3	0.975	0.765	0.449	-22.283	-64.967
25842	ASF1A	S747	M509	L10	1	1	0.88	-77.551	4.406
55723	ASF1B	S961	M272	L12	0.66	0.599	0.325	-37.967	-57.537
433	ASGR2	S809	M505	L256	1	1	1	36.496	58.928
55870	ASH1L	S476	M361	L13	0.975	0.75	0.688	2.535	57.04
9070	ASH2L	S459	M284	L33	0.983	0.595	0.768	-23.04	54.639
41	ASIC1	S1	M6	L2	0.758	0.955	1	89.156	-16.087
40	ASIC2	S414	M334	L1	0.99	0.855	0.914	62.04	-35.902
435	ASL	S437	M336	L3	0.965	0.553	0.453	-29.92	-4.838
439	ASNA1	S375	M340	L170	1	1	0.805	-73.362	64.975
440	ASNS	S474	M357	L166	1	1	0.995	-105.115	-12.002
253982	ASPHD1	S1	M6	L2	0.927	0.965	1	91.72	-7.748
259266	ASPM	S607	M367	L2	0.895	0.75	0.759	90.157	1.746
151516	ASPRV1	S812	M46	L3	0.695	0.954	0.414	-35.946	-4.439
445	ASS1	S583	M222	L132	0.99	0.889	0.825	22.975	-67.954
23245	ASTN2	S173	M4	L3	0.6	0.995	1	-20.686	-29.849
55210	ATAD3A	S13	M19	L8	0.995	0.55	0.769	44.205	69.898
83858	ATAD3B	S695	M517	L3	0.99	0.515	0.91	-31.845	-15.553
79915	ATAD5	S317	M84	L4	0.55	0.741	0.431	-10.506	31.779
466	ATF1	S157	M102	L4	0.949	0.945	0.513	-1.962	30.115
467	ATF3	S806	M68	L29	0.875	0.585	0.821	21.143	11.415
468	ATF4	S474	M357	L166	1	1	0.995	-105.38	-11.848
55729	ATF7IP	S376	M76	L4	0.985	0.57	0.535	-0.723	10.074
9776	ATG13	S73	M7	L9	0.883	0.903	1	-86.611	-40.727
84938	ATG4C	S962	M646	L306	0.575	0.575	0	-59.366	-42.526
84971	ATG4D	S62	M25	L4	0.605	0.882	0.513	-37.198	12.927
10533	ATG7	S546	M407	L88	0.99	0.93	0.442	-78.683	-56.998
471	ATIC	S24	M24	L16	1	1	1	4.317	86.224
51062	ATL1	S821	M6	L2	0.658	0.895	1	93.565	-1.516
64225	ATL2	S517	M388	L6	0.995	0.865	0.904	17.678	-28.422
84913	ATOH8	S843	M606	L273	0.925	0.785	0.439	33.804	-33.589
57205	ATP10D	S815	M43	L4	0.98	0.849	0.545	-4.033	7.425
476	ATP1A1	S24	M24	L16	0.98	0.995	0.99	7.42	85.415
483	ATP1B3	S106	M99	L65	1	0.995	1	-93.074	54.434
91419	ATP23	S1	M6	L2	0.547	0.787	1	89.305	-17.507
488	ATP2A2	S131	M33	L22	1	1	0.98	-59.648	36.079
490	ATP2B1	S204	M31	L4	0.528	0.974	0.507	-41.349	4.818
9914	ATP2C2	S435	M354	L88	1	0.975	0.533	-1.547	-3.687
495	ATP4A	S732	M533	L292	1	1	0.8	104.474	29.765
498	ATP5F1A	S13	M19	L8	0.995	0.55	0.769	49.842	69.965
506	ATP5F1B	S13	M19	L8	0.995	0.55	0.769	49.248	69.991
509	ATP5F1C	S12	M18	L8	0.89	0.93	0.711	46.786	51.454
513	ATP5F1D	S963	M647	L5	0.361	0.702	0.535	-96.389	11.492
514	ATP5F1E	S20	M1	L5	0.35	0.99	1	-93.924	29.106
84833	ATP5MD	S629	M6	L2	0.71	0.738	1	83.107	-11.96
521	ATP5ME	S12	M18	L8	0.89	0.945	0.758	47.869	51.944
9551	ATP5MF	S13	M19	L8	1	0.55	0.769	47.026	69.5
10632	ATP5MG	S15	M15	L8	1	0.995	0.731	60.461	62.18
9556	ATP5MPL	S582	M441	L2	0.99	0.8	0.613	66.362	25.375
515	ATP5PB	S155	M96	L8	0.98	0.635	0.768	52.167	63.093
10476	ATP5PD	S12	M18	L8	0.89	0.93	0.711	48.114	51.216
522	ATP5PF	S56	M79	L1	0.975	0.7	0.99	39.157	-50.866
539	ATP5PO	S13	M19	L8	0.995	0.55	0.769	50.119	69.02
537	ATP6AP1	S392	M73	L36	1	1	0.985	-76.701	55.809
10159	ATP6AP2	S392	M73	L36	1	1	0.985	-77	55.289
50617	ATP6V0A4	S502	M177	L6	0.945	0.943	0.718	-2.68	-20.185
533	ATP6V0B	S404	M1	L5	0.435	0.555	1	-89.935	17.161
527	ATP6V0C	S392	M73	L36	1	1	0.985	-76.65	56.259
9114	ATP6V0D1	S239	M12	L1	0.764	0.545	0.98	62.461	-39.652
8992	ATP6V0E1	S346	M273	L70	0.985	0.77	0.175	-1.533	-8.437
523	ATP6V1A	S234	M73	L36	0.7	1	0.985	-74.688	56.186
526	ATP6V1B2	S234	M73	L36	0.7	1	0.985	-74.394	56.195
528	ATP6V1C1	S27	M32	L26	1	1	0.96	-27.514	-94.914
51382	ATP6V1D	S234	M73	L36	0.7	1	0.985	-73.619	57.227
9296	ATP6V1F	S14	M1	L5	0.975	1	1	-98.31	29.563
534	ATP6V1G2	S873	M100	L10	0.615	0.95	0.656	-79.024	-18.305
127124	ATP6V1G3	S28	M17	L4	1	0.955	0.545	-7.763	15.966
51606	ATP6V1H	S404	M1	L5	0.435	0.555	1	-89.494	17.288
540	ATP7B	S313	M259	L120	1	0.98	0.245	-7.562	-70.265
57198	ATP8B2	S575	M445	L194	1	0.725	0.48	-23.477	31.872
545	ATR	S42	M60	L25	1	1	0.805	10.646	38.238
51374	ATRAID	S629	M6	L2	0.71	0.738	1	84.045	-12.164
84126	ATRIP	S42	M60	L25	1	1	0.805	11.208	37.407
26033	ATRNL1	S23	M22	L4	0.7	0.886	0.545	-20.129	5.258
546	ATRX	S175	M150	L79	0.985	0.99	0.975	21.262	89.297
6314	ATXN7	S342	M215	L1	1	0.85	0.974	71.491	-44.638
550	AUP1	S76	M64	L1	0.99	0.965	0.915	25.362	-49.127
6790	AURKA	S333	M223	L126	1	0.99	0.795	-38.282	-78.832
54998	AURKAIP1	S12	M18	L8	0.94	0.975	0.758	49.208	51.158
9212	AURKB	S58	M83	L44	1	1	0.97	28.597	56.217
26053	AUTS2	S964	M6	L2	0.467	0.565	0.628	81.459	-25.365
553	AVPR1B	S413	M333	L186	1	0.995	0.61	-60.253	-62.313
158835	AWAT2	S647	M304	L145	0.57	0.582	0.543	57.282	-41.2
51582	AZIN1	S403	M327	L1	0.905	0.44	0.995	45.021	-46.565
566	AZU1	S269	M3	L1	0.9	0.355	1	69.949	-63.228
26229	B3GAT3	S324	M218	L130	0.978	0.952	0.884	41.408	-76.115
145173	B3GLCT	S23	M22	L4	0.707	0.902	0.55	-19.868	3.6
10678	B3GNT2	S162	M144	L50	1	0.995	0.87	-0.541	-79.632
8703	B4GALT3	S488	M296	L1	0.765	0.382	0.82	-26.248	-97.004
8702	B4GALT4	S135	M122	L75	1	0.995	0.94	18.858	-62.32
11285	B4GALT7	S82	M31	L4	1	1	0.5	-42.53	3.492
23621	BACE1	S703	M476	L7	0.96	0.9	0.518	-51.5	68.464
25825	BACE2	S8	M9	L6	1	0.915	0.99	6.433	-34.581
571	BACH1	S321	M8	L6	0.515	1	0.99	12.493	-13.157
573	BAG1	S462	M318	L179	0.851	1	0.87	70.501	-20.531
9529	BAG5	S518	M34	L1	0.605	0.432	0.985	42.955	-28.714
7917	BAG6	S228	M175	L41	1	0.99	0.92	16.388	13.675
25805	BAMBI	S563	M5	L7	0.82	0.826	0.99	-35.937	81.054
8815	BANF1	S22	M2	L2	0.85	0.979	1	96.55	26.092
8314	BAP1	S502	M177	L6	0.915	0.959	0.764	-1.215	-20.627
580	BARD1	S425	M279	L25	1	0.84	0.535	10.267	44.007
343472	BARHL2	S87	M103	L4	0.944	0.545	0.548	-23.764	17.275
10538	BATF	S118	M118	L55	0.965	0.979	0.477	-18.9	30.012
581	BAX	S557	M422	L216	1	0.98	0.955	-61.187	-25.094
9031	BAZ1B	S712	M483	L267	0.995	0.995	0.995	25.972	81.552
27113	BBC3	S434	M17	L4	0.88	0.57	0.533	-13.013	10.515
63827	BCAN	S782	M303	L59	0.67	0.94	0.799	0.795	-65.531
55973	BCAP29	S18	M14	L1	0.989	0.655	1	72.511	-54.801
9564	BCAR1	S9	M10	L10	1	1	0.95	-82.133	-5.719
8412	BCAR3	S9	M10	L10	1	1	0.95	-82.717	-6.367
10286	BCAS2	S759	M521	L102	1	0.775	0.892	-77.026	42.541
56647	BCCIP	S55	M54	L3	0.988	0.515	0.595	-37.521	31.957
144233	BCDIN3D	S370	M28	L21	0.99	1	0.96	18.178	45.357
596	BCL2	S317	M84	L4	0.925	0.703	0.49	-13.118	33.156
598	BCL2L1	S66	M85	L17	0.964	0.959	0.589	-54.595	-5.653
10017	BCL2L10	S8	M9	L6	0.79	0.915	0.99	9.435	-31.845
83596	BCL2L12	S802	M8	L6	0.79	0.5	0.985	20.933	-22.623
599	BCL2L2	S319	M50	L31	0.875	0.985	0.775	-61.005	-34.776
604	BCL6	S196	M110	L12	0.98	0.995	0.32	-34.54	-50.664
9275	BCL7B	S166	M149	L3	1	0.97	0.957	-14.257	-15.092
607	BCL9	S48	M29	L3	0.985	0.965	0.455	-28.042	-67.097
9774	BCLAF1	S664	M111	L71	0.97	0.943	0.693	-17.67	-11.263
53630	BCO1	S386	M306	L184	0.995	0.995	0.87	62.138	-85.203
54880	BCOR	S482	M67	L3	0.511	0.487	0.472	4.944	6.458
617	BCS1L	S128	M19	L8	1	0.995	0.769	48.062	65.978
622	BDH1	S38	M39	L27	0.894	0.907	0.635	-9.586	-55.326
624	BDKRB2	S60	M77	L32	0.944	0.91	0.83	-48.376	-43.422
55814	BDP1	S84	M8	L6	0.48	0.789	0.99	4.015	-18.018
8678	BECN1	S84	M8	L6	0.52	0.995	0.99	16.031	-12.955
57596	BEGAIN	S418	M3	L1	0.95	0.644	0.985	59.339	-59.42
10282	BET1	S6	M4	L3	1	0.805	0.995	-25.874	-16.805
340542	BEX5	S139	M71	L42	0.934	0.92	0.848	32.217	9.259
633	BGN	S7	M4	L3	0.984	0.995	1	-25.486	-36.954
79365	BHLHE41	S784	M17	L4	0.585	0.862	0.545	-13.723	27.156
23299	BICD2	S723	M585	L1	0.93	0.43	0.985	76.894	-48.382
274	BIN1	S72	M4	L3	0.95	0.978	1	-20.641	-23.831
329	BIRC2	S481	M362	L4	0.778	0.643	0.358	0.991	4.886
332	BIRC5	S58	M83	L44	1	1	0.97	28.987	56.076
57448	BIRC6	S338	M208	L129	1	1	1	57.639	91.853
112401	BIRC8	S391	M311	L67	1	1	0.93	32.361	36.972
641	BLM	S138	M25	L4	0.705	0.735	0.523	-37.389	14.79
282991	BLOC1S2	S16	M2	L2	0.965	0.97	1	101.084	6.389
63915	BLOC1S5	S5	M2	L2	0.736	1	1	92.762	19.48
654	BMP6	S220	M193	L95	1	0.98	0.935	51.294	-6.525
657	BMPR1A	S102	M7	L9	0.805	0.974	1	-84.141	-49.666
658	BMPR1B	S522	M246	L127	1	0.985	0.58	-19.15	-48.788
9790	BMS1	S105	M65	L1	0.867	0.889	0.823	34.938	-27.923
388962	BOLA3	S355	M116	L54	0.97	0.956	0.895	25.741	50.864
23246	BOP1	S299	M257	L3	0.995	0.45	0.595	-42.106	29.94
79866	BORA	S2	M5	L7	0.941	1	1	-53.791	77.665
128861	BPIFA3	S193	M166	L2	0.96	0.805	1	102.716	-21.284
92747	BPIFB1	S436	M348	L2	0.985	0.735	0.961	81.731	-15.405
10380	BPNT1	S19	M1	L5	0.84	0.98	1	-88.789	22.374
2186	BPTF	S278	M255	L147	1	1	1	19.971	78.726
673	BRAF	S902	M158	L98	1	0.995	0.98	-77.925	10.983
8315	BRAP	S88	M23	L14	0.83	0.899	0.802	-21.513	38.074
672	BRCA1	S425	M279	L25	1	0.84	0.535	10.604	43.989
675	BRCA2	S356	M276	L153	0.92	0.785	0.775	30.983	3.123
23774	BRD1	S868	M628	L282	1	0.955	0.45	-64.731	12.321
6046	BRD2	S897	M600	L33	0.92	0.515	0.555	-19.97	57.114
23476	BRD4	S844	M129	L13	0.91	0.563	0.925	-1.862	59.436
29117	BRD7	S343	M212	L3	0.98	0.465	0.545	8.162	10.221
10902	BRD8	S321	M8	L6	0.515	1	0.99	12.252	-14.147
2972	BRF1	S19	M1	L5	0.788	0.98	1	-90.161	21.475
55290	BRF2	S80	M1	L5	0.516	0.611	1	-103.884	22.23
55299	BRIX1	S251	M203	L86	1	1	0.955	43.308	-11.892
55845	BRK1	S658	M393	L10	0.995	0.72	0.91	-82.74	-12.186
25855	BRMS1	S669	M9	L6	0.59	0.64	0.93	2.594	-42.361
84312	BRMS1L	S4	M7	L9	0.991	1	0.984	-81.907	-37.759
9024	BRSK2	S222	M47	L17	1	0.64	0.555	-49.448	-5.976
682	BSG	S249	M202	L111	0.995	0.98	0.54	-41.428	-51.467
8927	BSN	S25	M21	L2	0.553	0.665	1	74.347	31.165
9044	BTAF1	S890	M539	L6	0.935	0.51	0.98	20.318	-17.108
90135	BTBD6	S840	M481	L15	0.835	0.59	0.535	-49.355	-45.31
55727	BTBD7	S965	M4	L3	0	0.455	0.804	-17.349	-24.968
686	BTD	S158	M141	L3	0.775	0.631	0.571	-13.616	-44.526
689	BTF3	S652	M447	L3	1	0.97	0.468	-46.784	31.029
91408	BTF3L4	S463	M8	L6	0.88	0.47	0.99	6.073	-28.036
7832	BTG2	S138	M25	L4	0.798	0.721	0.523	-38.179	17.366
695	BTK	S28	M17	L4	0.989	0.955	0.545	-6.665	14.396
79908	BTNL8	S6	M4	L3	0.894	0.805	0.995	-26.248	-18.965
8945	BTRC	S233	M189	L4	1	0.99	0.477	-3.728	23.248
699	BUB1	S447	M297	L19	1	0.92	0.755	41.648	10.93
701	BUB1B	S696	M636	L253	1	0.784	0.404	-57.333	-15.466
9184	BUB3	S696	M636	L253	1	0.784	0.404	-57.079	-15.516
84811	BUD13	S445	M339	L180	1	1	0.895	-34.619	44.06
114049	BUD23	S116	M11	L11	0.58	1	0.965	-29.405	62.63
8896	BUD31	S61	M68	L29	1	1	0.935	20.668	8.615
705	BYSL	S2	M5	L7	0.78	1	1	-42.24	83.11
387638	C10orf113	S966	M27	L2	0	0.508	0.98	84.173	7.574
53838	C11orf24	S303	M113	L4	0.995	0.625	0.53	-17.209	2.246
219833	C11orf45	S637	M385	L52	1	0.755	0.929	50.526	18.447
79096	C11orf49	S25	M21	L2	0.994	0.673	1	73.841	27.653
54494	C11orf71	S569	M430	L210	1	0.985	0.945	-52.773	20.739
121053	C12orf45	S469	M21	L2	0.825	0.641	0.995	75.789	33.28
79794	C12orf49	S14	M1	L5	0.747	0.995	1	-98.017	40.615
146562	C16orf71	S409	M2	L2	0.59	0.987	0.985	89.118	14.944
388272	C16orf87	S7	M4	L3	0.741	0.99	1	-23.909	-27.805
100141515	C17orf99	S172	M70	L3	0.995	0.835	0.347	-16.557	-72.995
28974	C19orf53	S330	M171	L7	0.98	0.755	0.897	-42.566	68.871
10438	C1D	S17	M13	L1	0.989	0.894	0.965	37.845	-33.423
56913	C1GALT1	S153	M72	L1	1	0.914	0.951	30.118	-37.821
29071	C1GALT1C1	S298	M240	L124	1	0.99	0.668	68.521	-38.215
713	C1QB	S101	M108	L39	0.99	0.98	0.35	-5.679	-14.742
708	C1QBP	S584	M16	L8	0.705	0.655	0.731	64.893	51.94
114897	C1QTNF1	S29	M40	L15	1	1	0.635	-53.278	-41.759
114904	C1QTNF6	S7	M4	L3	0.979	0.985	1	-27.854	-37.881
716	C1S	S8	M9	L6	0.96	0.87	0.99	2.682	-38.033
54955	C1orf109	S221	M5	L7	0.955	0.988	1	-41.152	89.162
79098	C1orf116	S293	M34	L1	0.585	0.434	0.965	43.018	-26.243
54987	CZIB	S419	M2	L2	0.925	0.712	1	91.535	11.12
128061	C1orf131	S1	M6	L2	0.975	0.965	1	87.644	-12.253
79630	C1orf54	S1	M6	L2	0.958	0.965	1	92.78	-13.684
56245	C21orf62	S32	M44	L2	0.99	0.54	1	74.294	20.723
129852	C2orf73	S121	M9	L6	0.555	0.91	0.99	10.236	-39.358
285237	C3orf38	S10	M11	L11	0.983	1	0.965	-38.901	54.302
79669	C3orf52	S16	M2	L2	0.965	0.97	1	99.666	5.623
133491	C5orf47	S190	M6	L2	0.86	0.844	0.99	93.969	-15.98
100190949	C5orf52	S914	M6	L2	0.55	0.874	0.995	79.45	-10.029
221545	C6orf136	S95	M93	L2	0.995	0.92	0.761	79.391	41.94
29113	C6orf15	S530	M443	L2	0.96	0.864	0.974	81.549	8.832
347744	C6orf52	S207	M161	L2	0.6	0.505	1	90.508	-19.837
730	C7	S199	M176	L6	0.985	0.756	0.979	2.637	-26.959
157773	C8orf48	S468	M317	L2	0.97	0.71	0.989	82.688	-2.545
84688	C9orf24	S383	M45	L4	0.49	0.497	0.308	4.874	23.802
257169	C9orf43	S246	M127	L81	0.969	0.99	0.825	84.465	4.042
759	CA1	S99	M30	L3	0.635	0.49	1	-37.143	-29.837
763	CA5A	S120	M120	L37	1	1	0.725	-95.057	-19.362
767	CA8	S2	M5	L7	1	1	1	-43.751	74.129
51719	CAB39	S157	M102	L4	1	0.99	0.519	-1.236	27.904
23523	CABIN1	S827	M588	L52	1	0.98	0.923	51.508	21.107
81928	CABLES2	S233	M189	L4	1	0.99	0.477	-2.299	23.958
56344	CABP5	S650	M59	L3	0.78	0.51	0.382	-47.223	-16.119
164633	CABP7	S35	M12	L1	0.851	0.82	0.995	54.365	-31.977
85438	CABS1	S258	M213	L4	1	0.835	0.503	-2.862	18.541
11094	CACFD1	S49	M2	L2	0.535	0.49	1	76.559	20.21
774	CACNA1B	S761	M523	L278	1	1	0.98	44.84	-5.79
775	CACNA1C	S181	M136	L83	0.949	0.979	0.922	-54.58	6.379
8911	CACNA1I	S967	M648	L5	0	0	0.558	-87.616	20.803
55799	CACNA2D3	S268	M221	L1	0.995	0.525	1	71.379	-60.035
782	CACNB1	S11	M8	L6	0.9	0.99	0.99	14.796	-15.848
784	CACNB3	S104	M98	L64	1	0.959	0.455	-41.483	-62.73
10369	CACNG2	S153	M72	L1	0.84	0.894	0.947	30.284	-36.218
27091	CACNG5	S298	M240	L124	1	0.99	0.668	66.999	-38.145
790	CAD	S106	M99	L65	0.995	1	0.99	-92.729	56.017
199731	CADM4	S883	M7	L9	0.668	0.341	0.452	-78.255	-34.911
285782	CAGE1	S213	M2	L2	0.893	0.645	0.995	86.066	10.183
801	CALM1	S792	M550	L3	0.93	0.635	0.296	-20.954	-60.335
805	CALM2	S792	M550	L3	0.93	0.635	0.296	-20.647	-60.292
83698	CALN1	S76	M64	L1	0.9	0.895	0.815	24.856	-51.574
815	CAMK2A	S606	M142	L3	0.595	0.314	0.352	-43.773	-13.296
816	CAMK2B	S539	M401	L218	0.985	0.965	0.578	-21.004	-92.304
818	CAMK2G	S371	M302	L3	1	0.965	0.32	-27.933	-75.748
55450	CAMK2N1	S968	M84	L4	0	0.588	0.477	-8.919	29.699
84254	CAMKK1	S41	M17	L4	0.92	0.862	0.545	-15.325	22.686
10645	CAMKK2	S90	M57	L4	0.985	0.476	0.515	-8.181	0.943
819	CAMLG	S11	M8	L6	0.801	0.934	0.99	17.502	-17.86
55832	CAND1	S85	M74	L47	1	0.985	0.88	-14.562	-26.6
10487	CAP1	S179	M25	L4	0.935	0.569	0.387	-47.618	-0.916
822	CAPG	S52	M3	L1	0.945	0.975	1	62.524	-62.192
824	CAPN2	S583	M222	L132	0.825	0.905	0.839	23.163	-69.876
826	CAPNS1	S496	M457	L198	0.99	0.88	0.59	26.237	-8.706
65981	CAPRIN2	S173	M4	L3	0.405	0.633	0.92	-33.289	-37.969
832	CAPZB	S112	M114	L68	1	1	0.775	0.882	34.565
29775	CARD10	S797	M557	L248	0.89	0.653	0.639	82.185	-43.132
84433	CARD11	S71	M90	L4	0.989	0.89	0.535	2.787	15.35
64170	CARD9	S54	M75	L40	0.955	0.955	0.925	15.041	-72.105
10498	CARM1	S505	M377	L5	0.845	0.625	0.935	-108.395	35.254
146206	CARMIL2	S136	M16	L8	0.625	0.684	0.695	68.565	45.993
833	CARS	S391	M311	L67	1	1	0.93	31.121	37.228
79587	CARS2	S21	M16	L8	1	0.69	0.714	73.006	49.877
9607	CARTPT	S619	M2	L2	0.965	0.913	0.99	94.203	12.644
8573	CASK	S48	M29	L3	1	0.98	0.46	-28.036	-67.89
846	CASR	S210	M29	L3	0.57	0.757	0.472	-29.024	-61.419
729438	CASTOR2	S5	M2	L2	0.547	0.995	1	91.817	15.734
257062	CATSPERD	S301	M245	L2	1	0.905	0.98	79.727	3.365
57828	CATSPERG	S7	M4	L3	0.482	0.763	0.995	-28.125	-31.45
9139	CBFA2T2	S472	M322	L9	0.995	0.85	0.383	-37.785	-9.352
865	CBFB	S159	M42	L20	0.9	0.665	0.41	-12.26	-7.869
79872	CBLL1	S233	M189	L4	0.976	0.97	0.477	-3.472	25.389
84869	CBR4	S297	M239	L91	1	0.99	0.945	-64.043	-30.109
55871	CBWD1	S6	M4	L3	1	0.805	0.995	-29.504	-16.554
150472	CBWD2	S10	M11	L11	0.983	1	0.965	-38.757	54.729
23468	CBX5	S333	M223	L126	1	0.99	0.795	-37.772	-80.684
23492	CBX7	S142	M8	L6	0.64	0.955	0.99	7.5	-13.409
54862	CC2D1A	S47	M61	L24	1	1	0.775	37.994	-71.177
55749	CCAR1	S184	M155	L69	1	0.99	0.395	-17.464	-2.988
57805	CCAR2	S245	M200	L144	1	0.97	0.435	19.089	34.538
153733	CCDC112	S363	M282	L2	0.985	0.935	1	104.358	23.776
93233	CCDC114	S450	M356	L182	0.672	0.668	0.652	3.388	69.553
84317	CCDC115	S221	M5	L7	0.955	0.988	1	-40.926	89.514
57639	CCDC146	S896	M559	L300	1	0.99	0.75	38.552	-15.601
115948	CCDC151	S898	M27	L2	0.97	0.518	0.985	73.947	4.49
203238	CCDC171	S432	M2	L2	0.673	0.31	0.716	76.463	16.241
100499483	CCDC180	S189	M159	L2	1	0.98	0.981	107.811	15.187
57577	CCDC191	S2	M5	L7	0.935	0.995	1	-54.309	76.931
28952	CCDC22	S406	M329	L188	0.899	0.895	0.845	107.414	-9.797
79714	CCDC51	S95	M93	L2	1	0.925	0.767	79.853	40.447
8030	CCDC6	S30	M37	L4	0.995	0.955	0.543	-18.342	11.237
64925	CCDC71	S3	M3	L1	0.648	0.694	0.984	53.76	-61.645
124093	CCDC78	S395	M287	L102	1	1	0.99	-75.679	44.796
338657	CCDC84	S2	M5	L7	0.945	1	1	-43.758	78.595
80212	CCDC92	S229	M164	L2	0.97	0.645	0.938	94.208	40.534
54520	CCDC93	S807	M3	L1	0.945	0.976	0.995	54.582	-52.09
257236	CCDC96	S938	M549	L260	1	0.9	0.795	-71.366	-55.094
885	CCK	S8	M9	L6	1	0.915	0.99	10.506	-34.983
6370	CCL25	S141	M41	L1	0.94	0.595	0.859	59.695	-48.242
10850	CCL27	S18	M14	L1	1	0.655	1	72.049	-51.23
9560	CCL4L2	S337	M57	L4	0.789	0.739	0.315	-16.933	-53.616
8900	CCNA1	S309	M252	L115	0.995	0.99	0.715	15.45	25.01
890	CCNA2	S177	M143	L63	1	1	0.935	-60.559	-53.798
891	CCNB1	S177	M143	L63	1	1	0.935	-61.01	-53.153
85417	CCNB3	S38	M39	L27	0.894	0.908	0.645	-9.215	-54.538
892	CCNC	S220	M193	L95	0.985	0.96	0.915	52.665	-8.5
595	CCND1	S46	M58	L35	1	1	0.985	-63.508	22.155
894	CCND2	S69	M53	L1	0.975	0.92	0.923	29.551	-59.074
896	CCND3	S223	M179	L99	1	1	0.74	-15.053	47.736
898	CCNE1	S260	M214	L123	1	0.72	0.655	-3.514	-68.088
902	CCNH	S423	M321	L13	0.99	0.5	0.915	3.703	51.545
10983	CCNI	S341	M256	L49	0.96	0.985	0.425	-29.266	36.879
8812	CCNK	S219	M28	L21	0.99	0.525	0.99	23.806	39.106
57018	CCNL1	S263	M33	L22	0.605	0.729	0.835	-62.703	42.165
904	CCNT1	S803	M641	L32	0.675	0.397	0.43	-47.666	-46.704
9738	CCP110	S137	M125	L2	0.789	0.936	0.934	76.616	-2.716
1233	CCR4	S382	M301	L4	1	0.87	0.398	-6.641	22.59
1236	CCR7	S65	M8	L6	0.72	0.985	0.99	9.426	-17.012
10576	CCT2	S64	M30	L3	0.98	0.503	1	-40.769	-30.467
7203	CCT3	S64	M30	L3	0.98	0.503	1	-40.77	-30.878
10575	CCT4	S562	M2	L2	0.43	0.608	1	85.232	24.561
22948	CCT5	S251	M203	L86	1	1	0.955	43.997	-12.226
908	CCT6A	S3	M3	L1	0.96	0.979	1	54.919	-58.363
10574	CCT7	S64	M30	L3	0.52	0.51	1	-38.832	-30.886
10694	CCT8	S130	M2	L2	0.595	0.597	1	84.47	23.167
150160	CCT8L2	S126	M80	L46	0.99	0.97	0.907	55.83	24.303
977	CD151	S487	M13	L1	0.535	0.36	0.97	49.33	-38.993
912	CD1D	S90	M57	L4	1	0.473	0.525	-6.588	-0.476
913	CD1E	S53	M59	L3	0.98	0.905	0.445	-47.769	-21.126
30835	CD209	S394	M56	L6	0.985	0.55	0.975	25.23	-22.756
933	CD22	S150	M100	L10	0.925	0.87	0.679	-75.418	-19.534
10421	CD2BP2	S969	M134	L10	0	0.569	0.6	-76.828	-22.342
124599	CD300LB	S344	M4	L3	0.915	0.551	1	-31.19	-31.801
10849	CD3EAP	S789	M35	L3	0.65	0.563	0.477	-37.287	38.508
917	CD3G	S8	M9	L6	1	0.862	0.99	6.018	-31.263
958	CD40	S364	M3	L1	0.88	0.652	1	65.485	-58.211
959	CD40LG	S269	M3	L1	0.9	0.355	1	69.624	-62.221
960	CD44	S889	M474	L3	0.74	0.5	0.411	-13.22	-19.595
961	CD47	S79	M8	L6	0.925	0.714	0.99	9.756	-22.724
966	CD59	S52	M3	L1	0.945	0.975	1	63.025	-63.083
968	CD68	S248	M140	L24	0.975	0.98	0.811	30.211	-75.96
924	CD7	S8	M9	L6	1	0.862	0.99	4.664	-31.656
974	CD79B	S340	M47	L17	0.885	0.375	0.487	-41.613	-3.979
8832	CD84	S724	M38	L12	0.645	0.492	0.385	-53.774	-55.766
926	CD8B	S118	M118	L55	0.965	0.979	0.477	-19.129	30.503
83692	CD99L2	S133	M6	L2	0.69	0.945	1	80.38	-6.725
978	CDA	S970	M4	L3	0	0.842	0.934	-31.431	-24.265
146059	CDAN1	S178	M69	L5	0.905	0.51	1	-107.33	21.077
8872	CDC123	S57	M5	L7	0.505	1	1	-46.541	87.33
8556	CDC14A	S253	M241	L12	0.965	0.56	0.365	-50.011	-55.714
8555	CDC14B	S82	M31	L4	1	0.995	0.479	-52.795	-49.191
8881	CDC16	S2	M5	L7	0.964	1	1	-48.718	82.096
991	CDC20	S71	M90	L4	0.995	0.905	0.525	4.285	16.021
8697	CDC23	S146	M126	L19	1	0.995	0.585	38.554	15.437
993	CDC25A	S932	M76	L4	0.905	0.631	0.528	-0.451	14.626
994	CDC25B	S177	M143	L63	1	1	0.935	-60.318	-53.961
246184	CDC26	S296	M238	L134	1	1	0.62	70.775	-2.685
996	CDC27	S146	M126	L19	0.99	0.985	0.585	37.134	15.828
11140	CDC37	S34	M20	L13	1	0.995	0.92	-3.436	52.914
51362	CDC40	S188	M63	L18	1	1	0.405	27.722	29.423
998	CDC42	S37	M10	L10	0.755	0.985	0.945	-78.19	0.098
23580	CDC42EP4	S28	M17	L4	1	0.955	0.545	-8.967	14.295
8318	CDC45	S147	M130	L11	0.96	0.7	0.949	-23.992	63.175
988	CDC5L	S100	M3	L1	0.944	0.854	1	47.429	-50.267
990	CDC6	S114	M11	L11	0.615	0.84	0.965	-30.689	58.214
8317	CDC7	S834	M625	L264	1	1	0.92	-44.294	-87.798
79577	CDC73	S184	M155	L69	1	0.99	0.395	-18.195	-4.598
113130	CDCA5	S353	M274	L1	0.965	0.795	0.786	24.393	-41.077
83879	CDCA7	S32	M44	L2	0.995	0.54	1	71.716	21.776
55143	CDCA8	S14	M1	L5	0.975	1	1	-96.176	31.914
1009	CDH11	S226	M190	L14	1	0.795	0.435	-14.54	39.138
1014	CDH16	S893	M242	L6	0.89	0.821	0.942	4.981	-19.4
1016	CDH18	S275	M226	L6	1	0.995	0.938	19.485	-3.767
1000	CDH2	S37	M10	L10	0.755	0.985	0.945	-78.135	-0.37
64403	CDH24	S23	M22	L4	1	0.98	0.555	-21.654	1.214
1006	CDH8	S941	M462	L227	0.95	1	0.87	-114.046	-16.811
222256	CDHR3	S772	M1	L5	0.515	0.779	0.995	-97.956	43.096
10423	CDIPT	S565	M1	L5	0.79	0.765	1	-105.219	16.917
983	CDK1	S177	M143	L63	1	1	0.935	-60.109	-54.714
8558	CDK10	S907	M529	L286	1	1	0.495	-88.304	-6.054
728642	CDK11A	S545	M63	L18	0.935	0.525	0.441	27.164	25.286
984	CDK11B	S545	M63	L18	0.935	0.525	0.441	26.589	24.857
51755	CDK12	S219	M28	L21	0.99	0.525	0.99	23.821	39.342
8621	CDK13	S357	M277	L164	1	1	0.93	10.02	24.132
1017	CDK2	S260	M214	L123	1	0.72	0.655	-3.751	-68.199
8099	CDK2AP1	S394	M56	L6	0.985	0.55	0.975	23.804	-22.417
10263	CDK2AP2	S17	M13	L1	0.79	0.905	0.995	37.88	-35.669
1019	CDK4	S46	M58	L35	1	1	0.985	-63.529	22.296
51654	CDK5RAP1	S483	M3	L1	0.451	0.812	1	62.72	-47.054
55755	CDK5RAP2	S607	M367	L2	0.895	0.75	0.759	90.191	2.233
1021	CDK6	S223	M179	L99	1	1	0.74	-14.73	47.542
1022	CDK7	S971	M649	L307	0.61	0.685	0	29.021	-65.88
1024	CDK8	S972	M650	L3	0.595	0.43	0.399	-46.626	-72.102
1025	CDK9	S844	M129	L13	0.91	0.563	0.925	-1.672	59.749
54901	CDKAL1	S618	M92	L3	0.77	0.628	0.588	-22.869	-46.749
6792	CDKL5	S694	M525	L280	0.955	0.815	0.56	81.109	-25.848
1033	CDKN3	S64	M30	L3	0.918	0.477	0.949	-42.89	-34.25
50937	CDON	S588	M12	L1	0.52	0.789	0.99	52.076	-30.67
81620	CDT1	S973	M651	L308	0	0	0	-34.98	68.22
55573	CDV3	S698	M169	L2	0.895	0.493	0.985	101.502	-4.92
9425	CDYL	S688	M55	L4	0.445	0.565	0.536	-26.346	20.188
1089	CEACAM4	S7	M4	L3	0.96	0.97	0.98	-23.686	-37.849
1087	CEACAM7	S72	M4	L3	0.962	0.978	1	-20.588	-20.914
1050	CEBPA	S390	M331	L78	0.93	0.985	0.63	-4.606	67.506
1051	CEBPB	S664	M111	L71	0.97	0.943	0.693	-16.544	-11.324
1054	CEBPG	S196	M110	L12	0.98	0.995	0.32	-33.938	-50.764
10153	CEBPZ	S36	M35	L3	0.995	0.97	0.595	-40.707	35.872
1990	CELA1	S3	M3	L1	1	1	1	51.959	-62.729
10658	CELF1	S705	M468	L4	0.925	0.465	0.44	-22.393	22.757
56853	CELF4	S231	M194	L103	0.965	0.965	0.965	-71.056	16.817
60680	CELF5	S11	M8	L6	1	1	0.99	14.534	-19.393
1952	CELSR2	S286	M233	L1	1	0.98	1	77.276	-66.229
1951	CELSR3	S18	M14	L1	0.989	0.655	1	72.409	-54.992
57214	CEMIP	S189	M159	L2	1	0.98	0.981	106.071	15.568
1058	CENPA	S623	M450	L128	1	1	0.805	40.364	26.551
1059	CENPB	S432	M2	L2	0.89	0.478	1	78.104	17.698
1060	CENPC	S608	M27	L2	0.885	0.932	0.98	75.136	12.085
1062	CENPE	S447	M297	L19	1	0.92	0.755	41.796	10.891
1063	CENPF	S275	M226	L6	1	0.995	0.938	20.606	-4.451
64946	CENPH	S605	M459	L7	0.72	0.725	0.408	-56.777	85.341
2491	CENPI	S470	M353	L163	0.995	0.99	0.93	56.329	35.297
64105	CENPK	S605	M459	L7	0.88	0.725	0.73	-55.946	85.143
79019	CENPM	S152	M2	L2	0.955	0.527	1	77.132	26.538
55839	CENPN	S180	M1	L5	0.94	0.935	1	-105.91	30.475
79172	CENPO	S168	M3	L1	0.8	0.93	1	48.043	-67.673
80152	CENPT	S535	M80	L46	0.68	1	0.804	66.014	7.926
387103	CENPW	S535	M80	L46	0.675	0.987	0.799	65.729	7.576
22994	CEP131	S2	M5	L7	1	1	1	-49.125	77.516
55125	CEP192	S632	M2	L2	0.91	0.89	0.995	87.024	26.264
80184	CEP290	S562	M2	L2	0.37	0.406	0.995	80.753	29.204
85459	CEP295	S1	M6	L2	0.974	0.965	1	84.611	-8.537
55165	CEP55	S940	M78	L19	0.61	0.981	0.825	36.558	3.862
9702	CEP57	S727	M494	L2	0.849	0.609	0.935	74.96	0.482
23177	CEP68	S301	M245	L2	1	0.905	0.98	79.337	2.009
10390	CEPT1	S286	M233	L1	1	0.98	1	76.295	-67.474
29956	CERS2	S795	M563	L294	0.96	0.805	0.71	-45.745	53.653
204219	CERS3	S239	M12	L1	0.764	0.545	0.98	63.237	-39.5
253782	CERS6	S133	M6	L2	0.711	0.925	1	80.076	-8.071
23491	CES3	S560	M364	L3	0.525	0.79	0.37	-42.164	-65.356
283848	CES4A	S617	M134	L10	0.965	0.62	0.641	-74.024	-25.806
29105	CFAP20	S161	M1	L5	0.642	0.81	1	-102.803	15.746
56683	CFAP298	S2	M5	L7	1	1	1	-46.404	79.767
55779	CFAP44	S102	M7	L9	0.795	0.974	1	-83.365	-50.51
146845	CFAP52	S111	M4	L3	0.865	0.919	0.995	-33.934	-22.842
10428	CFDP1	S2	M5	L7	0.782	1	1	-42.166	79.396
1072	CFL1	S112	M114	L68	1	1	0.775	1.77	34.625
8837	CFLAR	S110	M42	L20	0.985	0.98	0.56	-7.586	-39.763
1080	CFTR	S388	M308	L187	0.97	0.96	0.96	44.211	-0.177
150356	CHADL	S1	M6	L2	0.471	0.795	1	97.043	-13.608
10036	CHAF1A	S801	M565	L128	1	0.97	0.77	38.637	24.599
8208	CHAF1B	S801	M565	L128	1	0.97	0.77	38.653	24.626
118487	CHCHD1	S484	M5	L7	0.435	0.699	0.93	-45.787	86.734
51142	CHCHD2	S308	M251	L133	0.975	0.985	0.97	-18.825	92.389
1105	CHD1	S37	M10	L10	0.755	0.985	0.945	-80.224	0.095
1106	CHD2	S289	M231	L92	0.995	0.965	0.77	-0.95	-32.504
1107	CHD3	S265	M67	L3	0.9	0.955	0.807	9.04	5.233
1108	CHD4	S649	M390	L226	0.84	0.823	0.788	10.406	5.862
55636	CHD7	S623	M450	L128	1	1	0.805	40.278	27.391
57680	CHD8	S30	M37	L4	0.668	0.857	0.525	-19.301	15.222
1111	CHEK1	S42	M60	L25	1	1	0.805	12.465	37.232
10523	CHERP	S66	M85	L17	0.964	0.97	0.599	-53.766	-1.317
1116	CHI3L1	S780	M594	L6	0.925	0.64	0.956	12.573	-25.165
1117	CHI3L2	S636	M12	L1	0.57	0.613	0.995	47.706	-35.532
1119	CHKA	S374	M326	L78	1	0.53	0.765	-2.546	66.062
1121	CHM	S34	M20	L13	0.969	0.985	0.92	-5.38	51.916
1122	CHML	S633	M112	L3	0.775	0.797	0.414	-19.903	-64.144
27243	CHMP2A	S884	M614	L238	1	1	0.97	110.418	33.015
51652	CHMP3	S884	M614	L238	1	1	0.97	110.415	33.015
128866	CHMP4B	S589	M5	L7	0.9	1	1	-45.768	92.514
51510	CHMP5	S2	M5	L7	0.93	1	1	-46.636	81.856
79643	CHMP6	S2	M5	L7	0.964	1	1	-49.537	81.634
91782	CHMP7	S495	M4	L3	0.94	0.385	0.97	-33.128	-18.769
26973	CHORDC1	S221	M5	L7	0.955	0.988	1	-41.486	88.737
11261	CHP1	S29	M40	L15	1	1	0.635	-53.807	-43.634
63928	CHP2	S704	M611	L32	0.865	0.495	0.455	-4.757	-45.332
8646	CHRD	S245	M200	L144	1	0.97	0.435	19.108	33.205
91851	CHRDL1	S46	M58	L35	0.91	0.91	0.895	-62.345	22.949
57053	CHRNA10	S210	M29	L3	0.57	0.757	0.472	-29.58	-61.257
1138	CHRNA5	S200	M55	L4	0.724	0.605	0.567	-37.474	3.9
1140	CHRNB1	S303	M113	L4	0.995	0.625	0.53	-15.373	2.727
1143	CHRNB4	S11	M8	L6	0.995	1	0.99	14.499	-22.493
1146	CHRNG	S59	M43	L4	0.791	0.753	0.51	-10.521	4.908
8534	CHST1	S204	M31	L4	0.416	0.938	0.509	-41.585	8.859
23563	CHST5	S337	M57	L4	0.838	0.766	0.295	-18.716	-54.284
63922	CHTF18	S370	M28	L21	0.98	1	0.97	18.217	43.937
54921	CHTF8	S589	M5	L7	0.9	1	1	-45.49	92.186
26097	CHTOP	S662	M467	L215	0.82	0.91	0.829	67.768	4.017
1147	CHUK	S668	M482	L247	0.948	0.66	0.56	19.884	-13.695
9391	CIAO1	S242	M243	L5	0.985	0.7	0.772	-78.711	34.91
51647	CIAO2B	S327	M5	L7	0.945	0.992	1	-39.247	85.218
64428	CIAO3	S2	M5	L7	0.902	1	1	-48.177	80.822
57019	CIAPIN1	S198	M82	L7	1	0.925	0.765	-54.693	72.78
51550	CINP	S20	M1	L5	0.725	0.99	1	-95.877	36.921
57650	CIP2A	S700	M622	L2	0.725	0.385	0.833	83.319	11.453
1153	CIRBP	S34	M20	L13	1	0.995	0.92	-2.651	54.237
11113	CIT	S918	M487	L241	1	1	0.92	-62.539	3.794
4435	CITED1	S642	M406	L224	0.785	0.777	0.735	-56.717	62.996
26586	CKAP2	S267	M14	L1	0.848	0.586	0.99	76.968	-51.331
9793	CKAP5	S108	M78	L19	1	1	0.985	39.332	6.192
1152	CKB	S103	M97	L12	0.995	0.905	0.435	-38.604	-72.05
1159	CKMT1B	S226	M190	L14	0.995	0.79	0.435	-15.091	39.489
1163	CKS1B	S42	M60	L25	0.995	0.995	0.8	10.73	39.852
1182	CLCN3	S624	M417	L3	0.98	0.77	0.53	-34.911	-38.684
1186	CLCN7	S176	M92	L3	0.779	0.828	0.52	-32.952	-59.232
23562	CLDN14	S776	M538	L177	1	0.91	0.485	20.287	-30.841
51208	CLDN18	S599	M9	L6	0.87	0.904	0.99	3.834	-35.589
10462	CLEC10A	S107	M3	L1	0.524	0.963	0.99	63.476	-68.661
29121	CLEC2D	S177	M143	L63	1	1	0.935	-59.355	-53.464
1192	CLIC1	S482	M67	L3	0.754	0.46	0.548	6.791	8.162
25932	CLIC4	S3	M3	L1	0.966	0.979	1	55.444	-59.245
1207	CLNS1A	S799	M560	L259	0.99	0.96	0.925	-120.494	16.627
10978	CLP1	S232	M160	L3	0.995	0.46	0.46	-37.113	-66.91
81570	CLPB	S433	M352	L175	1	1	1	34.591	90.274
8192	CLPP	S920	M612	L16	0.995	0.965	1	12.804	86.941
63967	CLSPN	S216	M4	L3	0.73	0.837	1	-22.701	-24.627
1212	CLTB	S258	M213	L4	1	0.835	0.503	-3.912	18.628
1213	CLTC	S74	M49	L28	0.883	0.906	0.615	-3.981	78.226
23277	CLUH	S21	M16	L8	1	0.69	0.714	71.049	53.361
100272147	CMC4	S7	M4	L3	0.795	0.985	0.99	-25.323	-28.896
80790	CMIP	S254	M206	L116	1	0.89	0.59	6.515	-64.924
1240	CMKLR1	S252	M204	L113	0.995	0.995	0.99	96.988	-31.539
51727	CMPK1	S259	M12	L1	0.94	0.24	0.99	39.789	-41.702
123920	CMTM3	S213	M2	L2	0.85	0.709	1	88.263	10.79
146223	CMTM4	S449	M81	L3	1	0.89	0.97	-25.492	-41.206
54918	CMTM6	S373	M292	L2	0.855	0.65	0.969	83.815	-20.581
23070	CMTR1	S10	M11	L11	0.729	1	0.965	-32.814	61.668
1261	CNGA3	S502	M177	L6	0.915	0.959	0.764	-1.187	-20.309
1258	CNGB1	S326	M265	L59	0.975	0.75	0.725	0.601	-59.184
29097	CNIH4	S279	M5	L7	0.435	1	1	-49.74	87.962
1265	CNN2	S189	M159	L2	1	0.98	0.981	108.014	16.714
23019	CNOT1	S22	M2	L2	0.4	0.874	1	98.756	27.683
25904	CNOT10	S32	M44	L2	0.972	0.54	0.995	69.333	21.172
4848	CNOT2	S96	M21	L2	0.675	0.633	0.985	73.813	35.848
4849	CNOT3	S974	M1	L5	0	0.52	1	-106.156	23.006
246175	CNOT6L	S88	M23	L14	0.82	0.889	0.794	-23.414	37.386
29883	CNOT7	S96	M21	L2	0.67	0.604	0.93	69.695	34.66
9125	CNOT9	S32	M44	L2	0.973	0.54	1	70.286	22.247
1267	CNP	S955	M74	L47	0.965	0.54	0.826	-12.076	-24.728
124817	CNTD1	S713	M556	L3	0.685	0.381	0.939	-32.714	-29.465
1272	CNTN1	S84	M8	L6	0.515	0.995	0.99	15.159	-12.385
6900	CNTN2	S140	M115	L77	1	0.995	0.905	10.007	-83.876
80347	COASY	S19	M1	L5	0.62	0.978	1	-87.612	28.793
22837	COBLL1	S369	M67	L3	0.74	0.971	0.84	-20.311	-16.25
1690	COCH	S266	M217	L52	0.859	0.978	0.763	54.263	8.562
9382	COG1	S119	M119	L72	1	1	1	60.374	-2.909
22796	COG2	S9	M10	L10	1	1	0.95	-77.44	-7.889
83548	COG3	S144	M1	L5	0.442	0.99	1	-92.38	36.77
25839	COG4	S119	M119	L72	1	1	1	60.656	-2.3
10466	COG5	S119	M119	L72	1	1	1	61.081	-2.906
57511	COG6	S119	M119	L72	1	1	1	60.918	-3.526
91949	COG7	S119	M119	L72	1	1	1	60.724	-3.077
1302	COL11A2	S522	M246	L127	1	0.985	0.58	-18.999	-48.741
80781	COL18A1	S422	M342	L181	0.985	0.985	0.8	62.996	-15.813
84570	COL25A1	S7	M4	L3	0.995	0.995	1	-26.976	-32.033
10087	COL4A3BP	S86	M38	L12	1	0.95	0.46	-48.427	-65.041
1293	COL6A3	S151	M133	L6	0.935	0.925	0.839	5.164	-8.948
1294	COL7A1	S115	M3	L1	0.63	0.969	0.97	43.027	-57.148
1295	COL8A1	S211	M187	L3	1	0.548	0.467	-23.24	-58.836
1296	COL8A2	S583	M222	L132	0.99	0.889	0.825	23.062	-68.226
1297	COL9A1	S533	M219	L125	0.995	0.94	0.845	-69.105	-50.43
1299	COL9A3	S898	M27	L2	0.97	0.518	0.985	73.681	4.231
10584	COLEC10	S172	M70	L3	0.995	0.835	0.347	-15.691	-74.709
64326	COP1	S310	M254	L143	0.995	0.995	0.995	-8.291	40.411
1314	COPA	S311	M33	L22	0.505	1	0.76	-82.489	-69.688
1315	COPB1	S22	M2	L2	0.85	0.974	1	96.77	27.836
9276	COPB2	S311	M33	L22	0.505	1	0.76	-82.641	-69.646
11316	COPE	S131	M33	L22	1	1	0.98	-59.602	33.418
22820	COPG1	S131	M33	L22	1	1	0.98	-60.458	34.39
9318	COPS2	S85	M74	L47	1	0.985	0.88	-14.119	-27.892
8533	COPS3	S85	M74	L47	1	0.985	0.88	-14.621	-27.414
51138	COPS4	S183	M4	L3	0.54	0.925	1	-17.178	-27.969
10987	COPS5	S85	M74	L47	1	0.985	0.88	-13.608	-27.059
10980	COPS6	S85	M74	L47	1	0.985	0.88	-13.127	-27.439
10920	COPS8	S85	M74	L47	1	0.985	0.88	-13.468	-26.939
22818	COPZ1	S311	M33	L22	0.505	1	0.76	-82.929	-69.567
84274	COQ5	S123	M4	L3	0.915	0.608	0.99	-28.362	-24.132
56997	COQ8A	S322	M268	L138	1	1	0.855	28.762	-4.599
79934	COQ8B	S90	M57	L4	0.989	0.467	0.525	-4.577	1.858
23603	CORO1C	S472	M322	L9	0.995	0.85	0.383	-37.515	-11.25
84940	CORO6	S13	M19	L8	1	0.55	0.769	44.368	72.662
1353	COX11	S128	M19	L8	1	0.995	0.769	47.773	64.995
10063	COX17	S945	M1	L5	0.83	0.558	0.99	-110.167	26.781
1327	COX4I1	S12	M18	L8	0.993	0.975	0.758	48.775	57.284
9377	COX5A	S12	M18	L8	0.89	0.93	0.711	47.732	50.673
1329	COX5B	S12	M18	L8	1	0.975	0.758	49.297	54.365
1340	COX6B1	S15	M15	L8	0.815	0.955	0.731	59.282	62.195
1345	COX6C	S975	M19	L8	0.45	0.475	0.679	49.099	74.479
1350	COX7C	S155	M96	L8	0.99	0.635	0.768	53.091	63.758
51200	CPA4	S168	M3	L1	0.8	0.93	1	48.81	-67.608
1362	CPD	S305	M236	L23	1	1	0.706	-57.696	47.823
1363	CPE	S276	M227	L3	0.995	0.8	0.853	-9.62	-16.678
132864	CPEB2	S561	M423	L3	0.995	0.92	0.97	-40.284	-26.203
55313	CPPED1	S896	M559	L300	1	0.99	0.75	38.546	-15.588
29894	CPSF1	S3	M3	L1	1	1	1	49.351	-59.318
53981	CPSF2	S568	M432	L10	1	0.965	0.834	-66.173	-13.67
51692	CPSF3	S52	M3	L1	0.945	0.975	1	61.021	-62.942
10898	CPSF4	S270	M1	L5	0.765	0.946	1	-102.407	35.635
79869	CPSF7	S194	M167	L2	1	0.995	0.981	96.471	-21.249
126129	CPT1C	S3	M3	L1	0.976	0.995	1	53.25	-56.63
1376	CPT2	S426	M345	L93	1	0.505	0.562	32.556	49.167
53336	CPXCR1	S256	M91	L30	0.94	0.994	0.935	46.38	28.455
56265	CPXM1	S195	M168	L6	1	0.66	0.975	25.603	-26.337
1378	CR1	S93	M50	L31	0.545	0.755	0.595	-59.552	-39.311
1381	CRABP1	S284	M123	L76	0.74	0.653	0.674	-54.861	13.759
27297	CRCP	S154	M1	L5	0.985	0.82	1	-99.87	17.549
1385	CREB1	S280	M229	L148	1	0.99	0.775	-49.132	26.081
10488	CREB3	S467	M320	L3	0.98	0.849	0.9	-31.857	-40.889
1387	CREBBP	S387	M124	L34	0.83	0.995	0.635	5.165	61.196
58487	CREBZF	S976	M8	L6	0.445	0.445	0.91	8.533	-25.839
8804	CREG1	S378	M270	L15	0.72	0.635	0.377	-49.294	-39.035
51232	CRIM1	S79	M8	L6	0.888	0.714	0.99	8.393	-22.639
1398	CRK	S9	M10	L10	1	1	0.95	-83.897	-6.937
1399	CRKL	S9	M10	L10	1	1	0.95	-82.113	-6.321
54675	CRLS1	S26	M26	L7	0.979	0.705	1	-33.425	89.488
51340	CRNKL1	S456	M84	L4	0.995	0.74	0.455	-8.414	31.985
49860	CRNN	S354	M310	L4	0.96	0.645	0.515	1.691	20.291
55118	CRTAC1	S274	M225	L141	0.97	0.975	0.779	-46.336	-50.514
1414	CRYBB1	S977	M8	L6	0.382	0.695	0.97	11.158	-20.304
1418	CRYGA	S296	M238	L134	1	1	0.62	71.213	-1.697
1419	CRYGB	S5	M2	L2	0.68	0.985	1	93.426	22.968
1421	CRYGD	S567	M1	L5	0.815	1	0.962	-74.996	21.914
51084	CRYL1	S23	M22	L4	1	0.98	0.555	-22.089	0.632
9946	CRYZL1	S430	M328	L185	1	1	1	-85.438	64.487
1431	CS	S13	M19	L8	0.995	0.55	0.769	49.827	68.518
7812	CSDE1	S819	M578	L289	1	1	1	42.287	36.384
1434	CSE1L	S63	M34	L1	0.98	0.48	0.995	45.384	-27.971
1436	CSF1R	S733	M499	L3	0.995	0.975	0.379	-21.362	25.437
1439	CSF2RB	S87	M103	L4	0.969	0.543	0.548	-21.885	17.09
64478	CSMD1	S442	M135	L66	0.965	0.83	0.64	4.182	-72.488
1446	CSN1S1	S400	M14	L1	0.75	0.613	1	69.507	-57.359
1452	CSNK1A1	S412	M309	L3	1	0.98	0.56	-39.705	43.646
1453	CSNK1D	S650	M59	L3	0.78	0.51	0.382	-47.244	-16.06
1459	CSNK2A2	S757	M196	L10	0.855	0.82	0.563	-64.695	-18.369
1460	CSNK2B	S757	M196	L10	0.855	0.82	0.563	-64.373	-18.484
1464	CSPG4	S114	M11	L11	0.49	0.762	0.93	-28.334	56.469
1477	CSTF1	S114	M11	L11	0.615	0.84	0.965	-30.401	56.29
1479	CSTF3	S380	M293	L5	0.915	0.715	0.995	-105.353	38.064
128817	CSTL1	S3	M3	L1	0.939	0.984	0.995	56.846	-69.995
203413	CT83	S665	M11	L11	0.75	0.563	0.663	-37.161	64.528
1487	CTBP1	S949	M564	L283	1	0.995	0.71	-71.957	4.439
80169	CTC1	S719	M6	L2	0.76	0.857	0.949	99.931	-8.698
10664	CTCF	S278	M255	L147	1	1	1	19.776	78.978
140690	CTCFL	S710	M22	L4	0.73	0.791	0.545	-28.471	2.929
23399	CTDNEP1	S978	M3	L1	0.846	0.497	1	58.208	-73.355
9150	CTDP1	S352	M63	L18	0.765	0.545	0.425	31.214	27.739
10106	CTDSP2	S3	M3	L1	0.98	1	1	54.114	-69.127
51496	CTDSPL2	S422	M342	L181	1	1	0.81	62.961	-17.074
1489	CTF1	S760	M41	L1	0.635	0.542	1	63.33	-50.968
1493	CTLA4	S541	M135	L66	0.6	0.503	0.37	55.549	-14.095
1499	CTNNB1	S592	M452	L223	1	1	1	-11.295	112.159
56998	CTNNBIP1	S471	M45	L4	0.98	0.639	0.365	3.906	11.934
56259	CTNNBL1	S41	M17	L4	0.602	0.586	0.41	-10.72	23.796
1503	CTPS1	S106	M99	L65	1	0.995	1	-91.754	56.813
56474	CTPS2	S141	M41	L1	0.865	0.484	1	59.039	-51.05
9646	CTR9	S480	M71	L42	0.844	0.977	0.789	-21.521	-7.592
5476	CTSA	S168	M3	L1	0.8	0.93	1	46.585	-68.508
90353	CTU1	S1	M6	L2	0.856	0.954	1	85.121	-5.391
348180	CTU2	S307	M250	L89	0.965	0.81	0.61	-68.116	75.588
8454	CUL1	S84	M8	L6	0.515	0.995	0.99	16.832	-12.061
8453	CUL2	S14	M1	L5	0.975	1	1	-99.085	28.616
8452	CUL3	S446	M358	L1	0.995	0.955	0.593	55.727	-22.167
8451	CUL4A	S23	M22	L4	0.995	0.975	0.555	-24.37	-0.876
8450	CUL4B	S115	M3	L1	0.665	0.995	1	44.714	-58.903
9820	CUL7	S162	M144	L50	0.97	0.965	0.845	1.731	-79.287
23113	CUL9	S381	M298	L176	1	0.99	0.945	12.318	-53.341
23316	CUX2	S60	M77	L32	0.99	0.96	0.865	-47.098	-43.206
57703	CWC22	S537	M461	L139	1	1	0.66	29.21	14.616
10283	CWC27	S100	M3	L1	0.99	0.823	0.96	50.538	-50.93
55280	CWF19L1	S11	M8	L6	0.995	1	0.99	16.66	-16.413
6387	CXCL12	S323	M262	L137	0.695	0.837	0.533	-47.787	-35.947
58191	CXCL16	S18	M14	L1	0.778	0.558	0.995	76.155	-60.673
284340	CXCL17	S190	M6	L2	0.86	0.844	0.99	95.17	-15.868
2920	CXCL2	S231	M194	L103	1	1	1	-70.096	14.785
4283	CXCL9	S33	M48	L1	0.958	0.724	0.995	51.716	-45.667
7852	CXCR4	S514	M391	L14	1	0.905	0.765	-21.444	46.285
30827	CXXC1	S309	M252	L115	1	0.99	0.71	16.246	24.137
1534	CYB561	S979	M652	L1	0.585	0.397	0.482	41.774	-46.483
80777	CYB5B	S281	M249	L149	0.95	0.95	0.945	-68.086	-2.533
124936	CYB5D2	S127	M87	L2	0.66	0.47	0.922	82.689	24.341
1727	CYB5R3	S659	M69	L5	0.945	0.553	1	-111.483	22.504
51167	CYB5R4	S380	M293	L5	0.915	0.715	0.995	-106.096	38.639
79415	CYBC1	S4	M7	L9	0.995	1	1	-83.49	-41.271
1537	CYC1	S128	M19	L8	1	0.995	0.769	48.189	65.381
54205	CYCS	S174	M15	L8	0.935	0.7	0.731	68.956	57.872
23191	CYFIP1	S130	M2	L2	0.595	0.597	1	84.587	22.621
340665	CYP26C1	S93	M50	L31	1	1	0.775	-62.761	-38.064
1594	CYP27B1	S595	M10	L10	0.775	1	0.95	-75.044	-4.133
1572	CYP2F1	S300	M244	L6	1	0.935	0.955	31.805	-19.935
1573	CYP2J2	S415	M335	L183	1	0.98	0.318	-43.181	16.402
29785	CYP2S1	S67	M86	L45	0.995	0.975	0.97	62.131	10.791
113612	CYP2U1	S79	M8	L6	0.736	0.612	0.83	7.944	-22.306
54905	CYP2W1	S262	M216	L6	0.995	0.865	0.985	18.114	-8.927
1580	CYP4B1	S706	M22	L4	0.875	0.843	0.555	-13	6.456
8529	CYP4F2	S597	M466	L12	1	0.97	0.271	-46.439	-55.297
126410	CYP4F22	S320	M261	L146	1	1	0.79	-69.718	-32.649
1602	DACH1	S915	M488	L243	1	1	0.54	-83.062	17.571
1603	DAD1	S131	M33	L22	1	1	0.98	-60.939	35.61
199699	DAND5	S169	M153	L2	1	0.91	0.988	90.31	32.106
1615	DARS	S36	M35	L3	0.995	0.97	0.595	-41.416	38.285
55157	DARS2	S21	M16	L8	1	0.69	0.714	73.324	52.594
1616	DAXX	S783	M23	L14	0.805	0.862	0.796	-20.096	36.318
26528	DAZAP1	S217	M184	L1	0.961	0.38	0.985	52.026	-23.682
10926	DBF4	S834	M625	L264	1	1	0.92	-44.297	-87.802
1622	DBI	S31	M51	L3	0.48	0.579	0.72	-46.832	-28.601
51163	DBR1	S10	M11	L11	0.99	1	0.965	-36.673	54.037
285429	DCAF4L1	S111	M4	L3	0.865	0.919	0.995	-34.091	-22.87
139425	DCAF8L1	S123	M4	L3	0.358	0.744	0.985	-28.625	-25.761
51473	DCDC2	S612	M2	L2	0.84	0.921	1	104.159	4.628
9201	DCLK1	S628	M31	L4	0.95	0.909	0.515	-40.861	11.025
64858	DCLRE1B	S597	M466	L12	1	0.97	0.271	-45.923	-55.296
64421	DCLRE1C	S62	M25	L4	0.555	0.59	0.378	-35.497	10.823
167227	DCP2	S504	M418	L6	1	0.975	0.94	4.022	-22.931
28960	DCPS	S306	M247	L131	1	1	1	30.255	-89.468
1638	DCT	S167	M55	L4	0.643	0.704	0.537	-34.978	6.664
1639	DCTN1	S17	M13	L1	0.75	0.837	0.995	41.433	-37.807
10540	DCTN2	S329	M82	L7	0.875	0.979	0.64	-58.323	74.544
11258	DCTN3	S329	M82	L7	0.875	0.979	0.64	-58.573	72.647
84516	DCTN5	S198	M82	L7	1	0.925	0.765	-55.823	72.47
10671	DCTN6	S329	M82	L7	0.875	0.979	0.64	-57.852	73.093
79077	DCTPP1	S1	M6	L2	0.933	0.96	1	89.904	-8.881
51181	DCXR	S843	M606	L273	0.925	0.785	0.439	33.552	-33.407
79016	DDA1	S2	M5	L7	0.782	1	1	-43.2	80.32
1642	DDB1	S183	M4	L3	0.365	0.48	0.709	-16.434	-29.028
1644	DDC	S3	M3	L1	0.82	0.901	0.995	55.466	-65.69
23259	DDHD2	S317	M84	L4	0.76	0.548	0.419	-14.117	32.279
84301	DDI2	S493	M9	L6	0.97	0.485	0.99	15.557	-34.001
1649	DDIT3	S242	M243	L5	0.98	0.705	0.772	-80.194	35.05
54541	DDIT4	S615	M62	L10	0.652	0.289	0.27	-70.424	-61.339
1650	DDOST	S207	M161	L2	0.6	0.505	1	90.081	-21.831
780	DDR1	S460	M300	L178	1	1	0.995	50.353	-92.799
65992	DDRGK1	S330	M171	L7	0.975	0.75	0.892	-42.53	67.747
1653	DDX1	S517	M388	L6	0.995	0.865	0.904	17.505	-27.959
1662	DDX10	S73	M7	L9	0.925	0.903	1	-87.177	-42.501
10521	DDX17	S315	M260	L112	1	1	0.69	-62.007	81.156
8886	DDX18	S36	M35	L3	0.995	0.97	0.595	-41.589	35.73
55308	DDX19A	S202	M180	L48	1	1	0.56	17.271	-46.316
11269	DDX19B	S322	M268	L138	1	1	0.855	28.403	-3.162
11218	DDX20	S770	M553	L276	0.77	0.69	0.341	48.075	37.094
9188	DDX21	S299	M257	L3	0.995	0.45	0.595	-42.394	30.75
9416	DDX23	S367	M94	L51	0.52	1	0.69	28.438	10.386
57062	DDX24	S70	M28	L21	0.992	1	0.99	22.815	41.672
55661	DDX27	S55	M54	L3	0.98	0.515	0.595	-37.296	34.694
10212	DDX39A	S730	M540	L1	0.95	0.755	0.933	48.029	-21.59
7919	DDX39B	S66	M85	L17	0.984	0.99	0.604	-53.292	-1.787
1654	DDX3X	S236	M182	L30	0.615	0.57	0.3	38.411	30.218
54514	DDX4	S490	M32	L26	0.518	0.435	0.395	-29.782	-88.98
51428	DDX41	S43	M46	L3	0.859	0.908	0.454	-50.061	-23.323
11325	DDX42	S451	M280	L156	0.995	0.97	0.625	12.313	30.426
9879	DDX46	S42	M60	L25	1	1	0.805	11.78	40.378
51202	DDX47	S443	M360	L158	1	1	0.835	35.975	-48.141
54555	DDX49	S440	M39	L27	0.655	0.945	0.71	-4.14	-53.286
1655	DDX5	S471	M45	L4	0.98	0.643	0.365	3.32	10.757
317781	DDX51	S36	M35	L3	0.994	0.97	0.595	-42.993	36.957
11056	DDX52	S405	M54	L3	0.988	0.582	0.635	-33.891	33.033
79039	DDX54	S36	M35	L3	0.943	0.96	0.595	-43.378	33.561
57696	DDX55	S266	M217	L52	0.965	0.959	0.834	54.548	10.204
54606	DDX56	S946	M586	L235	0.995	0.975	0.905	-23.471	71.246
83479	DDX59	S83	M62	L10	1	0.98	0.714	-70.429	-17.382
1656	DDX6	S631	M446	L206	1	1	1	-66.906	-85.798
50514	2021-12-01	S193	M166	L2	0.96	0.805	1	103.102	-22.426
1670	DEFA5	S145	M128	L82	0.574	0.772	0.555	56.781	-15.893
123099	DEGS2	S980	M3	L1	0.459	0.377	1	61.984	-48.518
9909	DENND4B	S622	M433	L2	0.99	0.94	0.86	77.964	-12.984
160518	DENND5B	S53	M59	L3	0.98	0.905	0.445	-47.099	-20.324
8562	DENR	S252	M204	L113	1	0.995	0.98	95.52	-30.059
55635	DEPDC1	S16	M2	L2	0.859	0.982	1	95.422	4.803
11067	DEPP1	S88	M23	L14	0.544	0.462	0.457	55.082	-29.721
51009	DERL2	S193	M166	L2	0.97	0.805	1	102.148	-18.966
55070	DET1	S310	M254	L143	0.995	0.995	0.995	-8.049	40.346
8694	DGAT1	S434	M17	L4	0.88	0.57	0.533	-13.73	11.404
54487	DGCR8	S608	M27	L2	0.885	0.932	0.98	74.617	11.735
9162	DGKI	S31	M51	L3	1	0.925	0.51	-51.206	-29.023
1716	DGUOK	S31	M51	L3	1	0.925	0.51	-52.109	-27.843
1717	DHCR7	S331	M152	L1	0.885	0.405	0.995	49.478	-26.09
79947	DHDDS	S358	M33	L22	0.539	0.846	0.935	-62.38	36.549
1719	DHFR	S106	M99	L65	0.995	1	0.99	-92.688	58.253
1723	DHODH	S106	M99	L65	0.995	1	0.99	-93.019	55.837
1725	DHPS	S17	M13	L1	0.98	0.92	0.995	41.097	-35.088
147015	DHRS13	S41	M17	L4	0.872	0.825	0.545	-12.948	23.161
9249	DHRS3	S48	M29	L3	0.959	0.985	0.445	-31.534	-64.7
1665	DHX15	S545	M63	L18	0.935	0.525	0.441	27.328	25.264
8449	DHX16	S284	M123	L76	0.765	0.845	0.814	-57.761	14.369
22907	DHX30	S13	M19	L8	1	0.55	0.769	46.374	71.001
56919	DHX33	S399	M324	L159	1	0.995	0.975	23.673	-87.637
9704	DHX34	S657	M196	L10	0.995	0.89	0.558	-66.727	-18.175
60625	DHX35	S62	M25	L4	0.975	0.9	0.513	-35.235	12.598
170506	DHX36	S200	M55	L4	0.745	0.623	0.569	-35.349	3.898
57647	DHX37	S36	M35	L3	0.943	0.96	0.595	-42.573	34.366
9785	DHX38	S188	M63	L18	0.99	0.99	0.41	27.74	27.281
79132	DHX58	S117	M117	L4	0.784	0.81	0.413	-50.141	8.648
1659	DHX8	S188	M63	L18	1	1	0.405	27.21	29.74
1660	DHX9	S355	M116	L54	0.985	1	0.915	25.159	49.977
56616	DIABLO	S500	M3	L1	0.75	0.73	0.985	58.568	-57.465
1729	DIAPH1	S166	M149	L3	0.995	0.965	0.963	-13.637	-17.729
23405	DICER1	S501	M373	L36	0.995	0.725	0.762	-70.685	53.842
11083	DIDO1	S44	M23	L14	0.985	1	0.855	-20.488	42.894
27292	DIMT1	S473	M319	L167	1	0.965	0.698	-33.685	26.891
57609	DIP2B	S608	M27	L2	0.885	0.932	0.98	75.33	12.688
22894	DIS3	S45	M1	L5	0.64	0.98	1	-82.751	25.215
115752	DIS3L	S229	M164	L2	0.783	0.426	0.995	94.785	2.665
27185	DISC1	S95	M93	L2	1	0.925	0.767	82.157	42.661
1736	DKC1	S17	M13	L1	0.98	0.92	0.995	39.904	-34.783
22943	DKK1	S134	M101	L6	0.985	0.83	0.982	4.151	-13.656
27123	DKK2	S518	M34	L1	0.605	0.432	0.985	42.397	-28.862
27122	DKK3	S3	M3	L1	0.82	0.901	0.995	54.951	-65.623
1737	DLAT	S374	M326	L78	1	0.53	0.765	-1.862	66.28
1738	DLD	S212	M24	L16	0.99	0.535	1	8.955	87.493
9231	DLG5	S228	M175	L41	1	0.99	0.925	17.974	15.799
8788	DLK1	S412	M309	L3	0.778	0.787	0.411	-40.142	45.318
1743	DLST	S212	M24	L16	0.99	0.535	1	9.488	87.764
1745	DLX1	S923	M619	L69	1	1	0.598	-65.303	-22.426
1747	DLX3	S873	M100	L10	0.615	0.95	0.656	-78.699	-18.001
55929	DMAP1	S92	M107	L33	0.988	0.815	0.743	6.492	30.48
93099	DMKN	S220	M193	L95	0.955	0.94	0.905	53.63	-7.719
1657	DMXL1	S111	M4	L3	0.585	0.599	0.773	-34.967	-22.414
123872	DNAAF1	S218	M163	L2	1	0.895	1	102.609	12.608
54919	DNAAF5	S814	M555	L34	0.965	0.62	0.535	8.835	62.718
196385	DNAH10	S95	M93	L2	1	0.925	0.767	81.178	39.929
27019	DNAI1	S597	M466	L12	1	0.97	0.271	-46.903	-55.313
10294	DNAJA2	S981	M48	L1	0.503	0.53	0.995	52.868	-48.913
9093	DNAJA3	S165	M148	L1	0.965	0.52	0.99	36.503	-41.968
79982	DNAJB14	S5	M2	L2	0.551	0.99	1	93.872	15.369
10049	DNAJB6	S907	M529	L286	1	1	0.495	-88.393	-6.031
55735	DNAJC11	S767	M528	L2	1	0.8	0.681	82.025	46.216
23341	DNAJC16	S982	M8	L6	0.64	0.525	0.99	20.413	-19.869
55192	DNAJC17	S19	M1	L5	0.788	0.98	1	-90.12	21.076
131118	DNAJC19	S695	M517	L3	0.99	0.515	0.91	-32.269	-15.655
27000	DNAJC2	S625	M7	L9	0.97	1	1	-85.784	-38.025
85479	DNAJC5B	S6	M4	L3	1	0.805	0.995	-27.191	-15.963
285126	DNAJC5G	S983	M653	L309	0.875	0.795	0	25.379	-12.917
7266	DNAJC7	S372	M290	L169	0.985	0.815	0.735	29.153	44.986
22826	DNAJC8	S984	M654	L310	0	0	0	73.66	-31.687
23234	DNAJC9	S57	M5	L7	0.505	1	1	-47.175	87.112
7802	DNALI1	S96	M21	L2	0.591	0.643	0.985	71.939	34.328
1776	DNASE1L3	S104	M98	L64	1	0.985	0.475	-43.425	-60.443
58511	DNASE2B	S56	M79	L1	0.87	0.653	0.96	42.65	-47.96
10059	DNM1L	S13	M19	L8	1	0.55	0.769	48.619	72.677
1785	DNM2	S74	M49	L28	1	1	0.66	-3.776	79.559
1786	DNMT1	S278	M255	L147	0.975	0.985	0.97	21.056	77.5
1789	DNMT3B	S86	M38	L12	1	0.95	0.46	-48.496	-64.931
116092	DNTTIP1	S646	M376	L1	1	0.91	1	44.841	-79.397
30836	DNTTIP2	S3	M3	L1	0.995	1	1	52.679	-62.075
80005	DOCK5	S9	M10	L10	1	1	0.95	-84.624	-7.25
9046	DOK2	S766	M44	L2	0.925	0.532	1	73.224	17.552
55715	DOK4	S520	M431	L3	0.995	0.97	0.69	10.359	12.948
22845	DOLK	S2	M5	L7	0.618	0.995	0.995	-38.047	79.487
57171	DOLPP1	S89	M1	L5	0.55	0.99	1	-100.856	30.279
29980	DONSON	S2	M5	L7	1	1	1	-49.914	79.631
9980	DOP1B	S497	M380	L4	0.885	0.385	0.545	-8.046	18.973
1798	DPAGT1	S40	M1	L5	0.485	0.825	1	-98.128	20.9
64174	DPEP2	S601	M436	L67	1	0.785	0.91	33.656	39.535
5977	DPF2	S669	M9	L6	0.607	0.63	0.915	2.311	-43.023
1801	DPH1	S663	M396	L7	1	0.995	1	-33.373	79.097
1802	DPH2	S663	M396	L7	1	0.995	1	-33.382	79.105
285381	DPH3	S2	M5	L7	0.44	0.944	0.99	-39.775	80.274
51611	DPH5	S663	M396	L7	1	0.995	1	-32.123	79.147
92715	DPH7	S6	M4	L3	0.57	0.805	0.995	-27.428	-11.411
8813	DPM1	S14	M1	L5	0.884	0.975	1	-98.852	27.542
8818	DPM2	S366	M285	L1	1	0.995	0.922	79.695	-55.457
57628	DPP10	S53	M59	L3	0.636	0.771	0.363	-65.733	-45.118
29952	DPP7	S195	M168	L6	1	0.66	0.975	25.761	-27.348
91039	DPP9	S129	M45	L4	0.618	0.92	0.296	3.027	0.977
151871	DPPA2	S499	M27	L2	0.46	0.914	0.99	71.822	10.902
147991	DPY19L3	S495	M4	L3	0.94	0.385	0.97	-33.556	-19.552
84661	DPY30	S459	M284	L33	0.983	0.595	0.768	-23.097	54.641
1810	DR1	S899	M583	L302	0.95	0.92	0.575	-93.968	51.319
128338	DRAM2	S516	M4	L3	0.825	0.729	1	-33.961	-26.807
10589	DRAP1	S28	M17	L4	1	0.955	0.545	-9.087	15.464
1812	DRD1	S176	M92	L3	1	0.941	0.492	-35.014	-61.025
4733	DRG1	S533	M219	L125	0.995	0.94	0.845	-68.922	-50.36
29102	DROSHA	S251	M203	L86	1	1	0.955	43.226	-11.273
1823	DSC1	S62	M25	L4	0.988	0.9	0.513	-33.212	13.236
1825	DSC3	S90	M57	L4	1	0.473	0.525	-5.883	0.584
79075	DSCC1	S327	M5	L7	0.945	0.992	1	-38.974	84.982
79980	DSN1	S169	M153	L2	1	0.91	0.988	91.214	33.896
1834	DSPP	S195	M168	L6	1	0.66	0.975	26.877	-25.648
51514	DTL	S238	M195	L20	1	0.94	0.416	-11.427	-32.737
1840	DTX1	S8	M9	L6	1	0.915	0.99	6.824	-32.582
196403	DTX3	S399	M324	L159	1	0.995	0.975	22.702	-86.51
1841	DTYMK	S272	M224	L151	1	0.955	0.885	-54.097	93.962
50506	DUOX2	S101	M108	L39	1	0.98	0.35	-4.812	-14.027
64118	DUS1L	S631	M446	L206	1	1	1	-66.335	-85.841
54920	DUS2	S794	M64	L1	0.805	0.952	0.923	25.644	-53.568
11221	DUSP10	S388	M308	L187	1	0.99	0.99	45.148	-0.294
51207	DUSP13	S233	M189	L4	0.976	0.97	0.477	-3.473	25.012
11072	DUSP14	S560	M364	L3	0.54	0.8	0.365	-41.963	-66.19
128853	DUSP15	S53	M59	L3	0.803	0.812	0.418	-64.01	-44.954
1846	DUSP4	S208	M188	L106	1	0.985	0.375	-14.52	59.626
1848	DUSP6	S738	M8	L6	0.685	1	0.985	12.937	-18.566
1854	DUT	S620	M387	L203	1	0.99	0.805	39.699	52.211
1778	DYNC1H1	S100	M3	L1	0.99	0.864	1	48.43	-51.581
1781	DYNC1I2	S99	M30	L3	0.635	0.49	1	-37.93	-28.974
51143	DYNC1LI1	S857	M543	L90	1	0.705	0.66	-101.957	9.108
1783	DYNC1LI2	S109	M2	L2	0.859	0.9	0.995	86.136	30.585
79659	DYNC2H1	S142	M8	L6	0.645	0.96	0.99	9.01	-13.537
51626	DYNC2LI1	S218	M163	L2	1	0.895	1	103.581	12.201
8655	DYNLL1	S144	M1	L5	0.819	0.979	0.995	-91.895	39.233
83658	DYNLRB1	S627	M400	L205	0.98	0.905	0.615	90.957	4.829
8798	DYRK4	S737	M23	L14	0.765	0.826	0.81	-17.667	41.251
1869	E2F1	S250	M207	L142	1	0.99	0.825	-67.634	4.981
1871	E2F3	S250	M207	L142	1	0.99	0.825	-68.153	4.869
1875	E2F5	S27	M32	L26	0.91	0.905	0.865	-29.744	-91.272
1877	E4F1	S567	M1	L5	0.71	0.772	0.786	-74.759	21.824
85403	EAF1	S454	M289	L107	0.86	0.745	0.497	-57.667	1.301
124454	EARS2	S378	M270	L15	0.72	0.635	0.377	-49.021	-38.539
1879	EBF1	S112	M114	L68	0.995	0.995	0.78	2.555	35.584
10148	EBI3	S84	M8	L6	0.509	0.995	0.99	14.599	-10.021
10969	EBNA1BP2	S17	M13	L1	0.986	0.915	0.995	42.827	-35.11
11319	ECD	S180	M1	L5	0.94	0.935	1	-106.865	31.333
1632	ECI1	S23	M22	L4	0.9	0.98	0.555	-26.203	0.296
51295	ECSIT	S12	M18	L8	0.99	0.975	0.758	51.951	55.057
1894	ECT2	S43	M46	L3	1	0.975	0.414	-33.615	-3.89
10913	EDAR	S342	M215	L1	1	0.85	0.974	72.378	-44.365
128178	EDARADD	S624	M417	L3	0.739	0.618	0.462	-31.543	-59.685
23644	EDC4	S237	M154	L3	0.98	0.905	0.767	-25.506	24.838
8721	EDF1	S576	M368	L17	0.87	0.455	0.47	-14.022	-37.359
10085	EDIL3	S144	M1	L5	0.88	0.986	0.995	-92.639	41.453
1906	EDN1	S76	M64	L1	0.979	0.955	0.921	22.618	-51.898
1909	EDNRA	S104	M98	L64	1	0.985	0.475	-43.701	-60.95
8726	EED	S332	M264	L34	1	0.935	0.548	11.261	63.325
1915	EEF1A1	S865	M537	L9	1	0.825	0.952	-86.297	-47.113
1933	EEF1B2	S2	M5	L7	1	1	1	-50.419	77.95
9521	EEF1E1	S985	M655	L145	0.592	0.406	0.465	41.156	-85.357
1937	EEF1G	S865	M537	L9	1	0.825	0.952	-85.957	-46.96
1938	EEF2	S236	M182	L30	0.815	0.805	0.405	37.494	29.163
196483	EEF2KMT	S272	M224	L151	1	0.955	0.885	-53.328	93.438
60678	EEFSEC	S292	M235	L119	1	1	0.65	-60.881	92.912
151651	EFHB	S334	M209	L117	0.715	0.97	0.47	45.544	10.534
80303	EFHD1	S3	M3	L1	0.98	1	1	53.316	-64.491
1947	EFNB1	S71	M90	L4	0.995	0.915	0.52	5.694	19.078
1949	EFNB3	S27	M32	L26	0.824	0.82	0.78	-28.749	-91.794
23167	EFR3A	S330	M171	L7	0.825	0.747	0.897	-41.001	67.35
9343	EFTUD2	S182	M13	L1	0.91	0.46	0.985	52.798	-39.577
1956	EGFR	S179	M25	L4	0.945	0.577	0.387	-48.374	-0.314
54583	EGLN1	S264	M111	L71	0.995	0.975	0.71	-7.811	-7.488
112398	EGLN2	S787	M548	L298	0.985	0.96	0.9	-41.859	-38.61
112399	EGLN3	S42	M60	L25	0.668	0.76	0.58	9.095	37.082
30845	EHD3	S986	M60	L25	0.425	0.5	0.62	6.288	40.089
26298	EHF	S570	M52	L3	0.58	0.747	0.368	-23.474	-52.941
79813	EHMT1	S539	M401	L218	1	0.98	0.59	-19.885	-92.088
10919	EHMT2	S539	M401	L218	1	0.98	0.59	-20	-92.109
10209	EIF1	S255	M1	L5	0.89	0.899	1	-96.352	24.263
84285	EIF1AD	S2	M5	L7	1	1	1	-47.095	76.599
83939	EIF2A	S5	M2	L2	0.967	0.99	1	95.4	22.809
9451	EIF2AK3	S564	M363	L197	1	0.829	0.34	-44.389	-68.34
440275	EIF2AK4	S474	M357	L166	1	1	0.995	-105.615	-11.706
1967	EIF2B1	S63	M34	L1	0.98	0.48	0.995	46.698	-27.065
8892	EIF2B2	S372	M290	L169	0.985	0.815	0.735	29.545	44.381
8891	EIF2B3	S544	M35	L3	0.92	0.958	0.598	-41.591	41.168
8890	EIF2B4	S259	M12	L1	0.94	0.24	0.99	40.059	-42.348
8893	EIF2B5	S259	M12	L1	0.94	0.24	0.99	40.24	-42.651
1965	EIF2S1	S22	M2	L2	0.835	0.968	0.985	100.474	29.071
8894	EIF2S2	S762	M617	L67	0.995	0.815	0.84	32.251	33.931
1968	EIF2S3	S32	M44	L2	0.563	0.455	0.99	70.285	18.927
8661	EIF3A	S440	M39	L27	0.655	0.945	0.71	-3.994	-52.988
8662	EIF3B	S7	M4	L3	0.805	0.995	1	-25.264	-29.299
8664	EIF3D	S5	M2	L2	0.967	0.99	1	96.026	22.371
3646	EIF3E	S513	M382	L200	1	1	0.965	57.892	-26.473
8665	EIF3F	S217	M184	L1	0.965	0.38	0.99	52.73	-25.608
8666	EIF3G	S185	M156	L53	0.995	0.5	0.364	-49.72	-73.762
8667	EIF3H	S38	M39	L27	1	0.995	0.72	-5.103	-55.973
8668	EIF3I	S569	M430	L210	1	0.985	0.945	-52.633	20.725
8669	EIF3J	S360	M13	L1	0.485	0.76	0.995	46.012	-39.322
51386	EIF3L	S285	M253	L110	0.985	0.99	0.975	43.176	20.659
10480	EIF3M	S416	M2	L2	0.598	0.918	1	94.109	30.052
1973	EIF4A1	S543	M405	L202	1	1	1	-62.252	49.956
1974	EIF4A2	S58	M83	L44	1	0.995	0.965	27.334	55.59
9775	EIF4A3	S135	M122	L75	1	0.995	0.94	18.607	-61.697
1975	EIF4B	S27	M32	L26	0.975	0.975	0.935	-29.625	-93.9
1977	EIF4E	S543	M405	L202	1	1	1	-62.147	49.879
317649	EIF4E3	S556	M2	L2	0.63	0.506	0.995	88.533	21.309
8637	EIF4EBP3	S31	M51	L3	0.778	0.845	0.535	-47.967	-28.388
1981	EIF4G1	S543	M405	L202	1	1	1	-62.154	49.889
1982	EIF4G2	S318	M263	L114	0.895	0.895	0.755	61.966	34.775
8672	EIF4G3	S4	M7	L9	1	1	1	-76.954	-43.147
1983	EIF5	S271	M139	L87	1	0.95	0.63	-48.799	64.957
1984	EIF5A	S688	M55	L4	0.445	0.565	0.536	-26.359	19.849
143244	EIF5AL1	S167	M55	L4	0.435	0.59	0.539	-26.538	18.851
9669	EIF5B	S3	M3	L1	1	1	1	49.819	-60.876
3692	EIF6	S63	M34	L1	0.98	0.48	0.995	44.515	-27.994
7260	EIPR1	S11	M8	L6	0.995	0.995	0.985	15.6	-17.07
60528	ELAC2	S146	M126	L19	0.775	0.8	0.482	0.021	-50.102
1994	ELAVL1	S466	M283	L3	1	0.65	0.635	-20.726	-44.157
1998	ELF2	S159	M42	L20	0.874	0.737	0.435	-15.326	-8.258
8178	ELL	S454	M289	L107	0.86	0.745	0.497	-56.766	0.915
22936	ELL2	S603	M177	L6	1	0.925	0.816	0.639	-19.07
80237	ELL3	S46	M58	L35	1	1	0.985	-63.963	21.682
63916	ELMO2	S37	M10	L10	0.755	0.985	0.945	-79.886	1.196
6923	ELOB	S264	M111	L71	1	1	0.73	-7.56	-6.919
6921	ELOC	S380	M293	L5	0.915	0.715	0.995	-104.385	39.099
84337	ELOF1	S1	M6	L2	0.974	0.965	1	85.164	-9.659
54898	ELOVL2	S987	M70	L3	0.55	0.426	0.45	-19.922	-73.29
8518	ELP1	S421	M341	L5	0.995	0.855	0.99	-110.937	29.578
55250	ELP2	S307	M250	L89	0.965	0.81	0.61	-67.873	76.131
55140	ELP3	S307	M250	L89	0.965	0.81	0.61	-67.57	74.797
26610	ELP4	S360	M13	L1	0.485	0.76	0.995	45.446	-40.262
23587	ELP5	S307	M250	L89	0.965	0.81	0.61	-67.064	75.609
54859	ELP6	S307	M250	L89	0.965	0.81	0.61	-67.55	75.898
23065	EMC1	S132	M121	L73	1	1	1	-42.005	106.855
9694	EMC2	S132	M121	L73	1	1	1	-40.623	106.567
55831	EMC3	S132	M121	L73	1	1	1	-41.459	106.273
51234	EMC4	S132	M121	L73	1	1	1	-39.952	106.687
56851	EMC7	S132	M121	L73	1	1	1	-41.477	106.024
129080	EMID1	S6	M4	L3	0.698	0.74	0.97	-25.675	-22.94
90187	EMILIN3	S436	M348	L2	0.985	0.735	0.961	81.936	-14.508
27436	EML4	S485	M369	L3	0.956	0.44	0.975	-17.234	-34.213
400954	EML6	S390	M331	L78	0.935	0.99	0.63	-5.766	66.874
2016	EMX1	S27	M32	L26	0.965	0.965	0.925	-30.641	-92.562
2019	EN1	S729	M554	L250	0.57	0.648	0.556	-38.785	18.904
8507	ENC1	S917	M580	L6	0.975	0.68	0.969	16.269	-6.912
2021	ENDOG	S704	M611	L32	0.865	0.495	0.455	-4.72	-45.307
284131	ENDOV	S30	M37	L4	0.965	0.95	0.545	-17.954	12.1
2023	ENO1	S170	M146	L74	1	1	0.995	-74.607	-85.488
58478	ENOPH1	S33	M48	L1	0.958	0.724	0.995	52.953	-46.176
2028	ENPEP	S875	M635	L297	1	1	1	4.931	101.668
2029	ENSA	S58	M83	L44	1	1	0.97	30.316	55.074
955	ENTPD6	S875	M635	L297	1	1	1	4.928	101.658
56943	ENY2	S76	M64	L1	0.591	0.565	0.522	26.571	-49.052
2033	EP300	S387	M124	L34	0.83	0.995	0.635	5.055	61.14
57634	EP400	S92	M107	L33	0.988	0.815	0.743	6.546	30.302
64097	EPB41L4A	S333	M223	L126	1	0.99	0.795	-38.136	-79.622
2038	EPB42	S95	M93	L2	1	0.915	0.76	82.183	40.973
80314	EPC1	S110	M42	L20	0.55	0.553	0.315	-9.369	-37.531
26122	EPC2	S483	M3	L1	0.397	0.852	1	58.633	-65.885
284656	EPHA10	S478	M295	L172	1	1	0.99	-68.1	30.092
2046	EPHA8	S656	M8	L6	0.615	0.688	0.975	10.992	-15.523
2050	EPHB4	S371	M302	L3	1	0.965	0.32	-28.435	-75.435
2051	EPHB6	S200	M55	L4	0.74	0.621	0.569	-35.671	4.927
7957	EPM2A	S117	M117	L4	0.865	0.556	0.394	-46.385	11.075
22905	EPN2	S117	M117	L4	0.503	0.573	0.426	-50.851	10.085
2058	EPRS	S45	M1	L5	0.63	0.98	1	-83.361	24.189
2060	EPS15	S911	M151	L3	0.775	0.787	0.566	-14.098	18.486
54869	EPS8L1	S33	M48	L1	0.921	0.719	0.995	50.27	-45.596
94240	EPSTI1	S72	M4	L3	0.962	0.978	1	-19.855	-20.011
26284	ERAL1	S15	M15	L8	0.637	0.995	0.731	63.497	59.013
2064	ERBB2	S576	M368	L17	0.865	0.45	0.47	-14.256	-36.458
2065	ERBB3	S576	M368	L17	0.87	0.455	0.47	-14.056	-37.212
2068	ERCC2	S34	M20	L13	0.671	0.795	0.755	-2.537	51.579
2072	ERCC4	S9	M10	L10	1	1	0.95	-80.563	-8.77
2073	ERCC5	S503	M374	L193	1	0.985	0.77	86.679	-28.73
54821	ERCC6L	S36	M35	L3	0.871	0.91	0.59	-43.798	33.345
2069	EREG	S82	M31	L4	0.92	0.995	0.5	-40.434	2.982
2079	ERH	S372	M290	L169	0.985	0.815	0.735	29.666	44.076
114625	ERMAP	S6	M4	L3	0.807	0.805	0.995	-25.517	-14.215
79956	ERMP1	S133	M6	L2	0.611	0.954	1	82.19	-6.593
2081	ERN1	S172	M70	L3	0.675	0.715	0.327	-13.99	-75.505
10595	ERN2	S402	M43	L4	0.595	0.813	0.535	-6.754	9.667
23071	ERP44	S643	M386	L9	0.835	0.565	0.679	-83.139	-30.405
405754	ERVFRD-1	S27	M32	L26	0.91	0.905	0.865	-29.387	-91.572
157570	ESCO2	S104	M98	L64	1	0.985	0.475	-42.692	-59.658
51575	ESF1	S2	M5	L7	0.752	1	1	-41.148	73.662
11082	ESM1	S18	M14	L1	0.817	0.621	1	68.452	-47.413
9700	ESPL1	S14	M1	L5	0.975	1	1	-95.124	31.129
2099	ESR1	S181	M136	L83	0.949	0.979	0.922	-55.483	6.31
2104	ESRRG	S461	M288	L165	0.965	0.95	0.935	28.886	67.482
2107	ETF1	S67	M86	L45	0.979	1	0.985	64.944	12.89
2108	ETFA	S45	M1	L5	0.249	0.482	0.497	-36.356	-14.515
2109	ETFB	S615	M62	L10	0.695	0.731	0.641	-71.544	-61.969
55500	ETNK1	S614	M53	L1	0.5	0.789	0.857	25.141	-60.69
2117	ETV3	S35	M12	L1	0.98	0.815	0.995	57.426	-36.552
2120	ETV6	S440	M39	L27	0.545	0.755	0.56	-3.41	-51.831
2130	EWSR1	S572	M378	L50	1	0.995	0.427	-5.814	-82.203
55763	EXOC1	S131	M33	L22	1	1	0.98	-61.773	34.813
55770	EXOC2	S79	M8	L6	0.883	0.698	0.99	7.13	-24.369
60412	EXOC4	S2	M5	L7	1	1	1	-45.17	81.371
10640	EXOC5	S207	M161	L2	0.6	0.505	1	91.059	-19.795
149371	EXOC8	S506	M427	L11	0.98	0.925	0.949	-31.337	53.074
51013	EXOSC1	S17	M13	L1	0.989	0.894	0.965	38.117	-33.81
5394	EXOSC10	S731	M69	L5	0.46	0.513	1	-107.72	25.124
23404	EXOSC2	S19	M1	L5	0.84	0.98	1	-87.666	23.369
51010	EXOSC3	S296	M238	L134	1	1	0.62	72.164	-2.424
54512	EXOSC4	S731	M69	L5	0.46	0.513	1	-107.489	24.756
56915	EXOSC5	S511	M65	L1	0.59	0.624	0.913	39.326	-29.781
118460	EXOSC6	S2	M5	L7	0.995	1	1	-45.789	77.78
23016	EXOSC7	S45	M1	L5	0.64	0.98	1	-81.826	25.16
11340	EXOSC8	S45	M1	L5	0.64	0.98	1	-82.624	25.285
5393	EXOSC9	S69	M53	L1	0.995	0.945	0.951	31.777	-58.119
2132	EXT2	S932	M76	L4	0.905	0.631	0.528	-0.463	14.912
2146	EZH2	S332	M264	L34	1	0.935	0.548	11.446	63.24
50848	F11R	S138	M25	L4	0.793	0.717	0.526	-38.603	17.477
2147	F2	S18	M14	L1	1	0.655	1	74.431	-52.885
646486	FABP12	S4	M7	L9	0.995	1	1	-80.728	-43.219
2171	FABP5	S657	M196	L10	0.995	0.89	0.558	-66.52	-17.138
8772	FADD	S110	M42	L20	0.985	0.98	0.56	-6.975	-40.414
23197	FAF2	S653	M137	L84	1	0.915	0.805	21.387	20.012
2184	FAH	S157	M102	L4	1	0.99	0.519	-0.235	26.91
90736	FAM104B	S811	M5	L7	0.83	0.947	0.995	-53.53	81.396
79607	FAM118B	S464	M169	L2	0.99	0.815	0.995	100.55	-1.864
84668	FAM126A	S5	M2	L2	0.551	0.99	1	93.029	16.81
257415	FAM133B	S2	M5	L7	1	1	1	-45.857	72.644
84908	FAM136A	S929	M498	L295	0.99	0.99	0.965	75.023	-16.092
145483	FAM161B	S16	M2	L2	0.899	0.97	1	97.062	8.535
26355	FAM162A	S612	M2	L2	0.84	0.921	1	103.598	4.68
284069	FAM171A2	S1	M6	L2	0.927	0.965	1	93.815	-5.172
165215	FAM171B	S145	M128	L82	1	0.885	0.645	65.158	-30.825
134145	ATPSCKMT	S4	M7	L9	0.995	1	1	-80.815	-41.707
51252	FAM178B	S1	M6	L2	0.848	0.945	1	92.503	-10.253
389558	FAM180A	S1	M6	L2	0.985	0.965	1	85.948	-10.766
84070	FAM186B	S7	M4	L3	0.992	0.981	0.908	-22.14	-37.86
51313	GASK1B	S671	M2	L2	0.39	0.5	1	87.415	12.125
221786	FAM200A	S4	M7	L9	0.995	1	1	-82.418	-39.875
285550	FAM200B	S207	M161	L2	0.6	0.505	1	90.242	-21.221
54942	ABITRAM	S409	M2	L2	0.595	0.993	0.985	90.546	15.063
85395	FAM207A	S988	M656	L1	0.605	0.63	0.509	29.192	-65.841
29902	FAM216A	S674	M545	L1	0.974	0.73	0.979	62.681	-42.054
26017	FAM32A	S201	M185	L37	1	0.95	0.71	-94.37	-15.311
60343	FAM3A	S16	M2	L2	0.869	0.97	1	95.658	10.765
54097	FAM3B	S218	M163	L2	1	0.895	1	102.791	13.628
131177	FAM3D	S194	M167	L2	1	0.995	0.981	93.797	-21.688
9130	FAM50A	S210	M29	L3	0.556	0.729	0.472	-27.305	-62.535
388650	DIPK1A	S903	M561	L246	1	1	0.97	-42.685	62.465
375061	FAM89A	S530	M443	L2	0.985	0.889	0.974	80.738	7.888
51439	FAM8A1	S7	M4	L3	0.979	0.985	1	-27.704	-37.309
171484	FAM9C	S499	M27	L2	0.404	0.893	0.99	72.66	12.371
22909	FAN1	S237	M154	L3	0.975	0.9	0.767	-26.571	23.879
2175	FANCA	S936	M624	L190	1	0.995	0.38	10.029	47.518
2188	FANCF	S845	M40	L15	0.525	0.99	0.635	-56.41	-42.967
55215	FANCI	S936	M624	L190	1	0.995	0.38	10.015	47.555
55120	FANCL	S923	M619	L69	1	1	0.598	-65.287	-22.445
57697	FANCM	S699	M478	L25	0.99	0.7	0.4	13.292	45.416
10667	FARS2	S579	M465	L8	0.915	0.77	0.642	61.483	54.205
2193	FARSA	S886	M1	L5	0.81	0.645	1	-87.522	35.547
10056	FARSB	S20	M1	L5	0.465	0.99	1	-98.275	34.067
356	FASLG	S362	M70	L3	0.76	0.323	0.465	-38.563	-65.021
2194	FASN	S604	M404	L221	1	1	0.935	-3.365	87.925
10922	FASTK	S413	M333	L186	1	0.995	0.61	-61.317	-61.948
22868	FASTKD2	S109	M2	L2	0.715	0.651	0.98	83.74	33.398
60493	FASTKD5	S235	M192	L8	0.885	0.455	0.763	55.353	60.54
2197	FAU	S405	M54	L3	1	0.602	0.6	-34.111	34.383
2091	FBL	S137	M125	L2	0.974	0.91	1	79.733	-3.607
54751	FBLIM1	S198	M82	L7	1	0.925	0.765	-56.179	70.22
2199	FBLN2	S69	M53	L1	1	0.94	0.945	30.948	-57.373
57666	FBRSL1	S133	M6	L2	0.695	0.945	1	81.984	-9.337
54850	FBXL12	S347	M271	L43	0.965	0.605	0.54	16.215	53.546
26267	FBXO10	S73	M7	L9	0.883	0.903	1	-86.339	-40.896
80204	FBXO11	S93	M50	L31	0.425	0.913	0.765	-63.387	-39.662
115290	FBXO17	S222	M47	L17	0.98	0.625	0.565	-47.754	-5.387
23014	FBXO21	S120	M120	L37	1	1	0.725	-96.073	-19.677
26260	FBXO25	S286	M233	L1	1	0.98	1	76.248	-66.383
114907	FBXO32	S328	M211	L3	0.88	0.475	0.654	-41.933	-19.16
26271	FBXO5	S238	M195	L20	1	0.94	0.416	-9.709	-32.943
23291	FBXW11	S752	M605	L268	1	1	0.565	-10.009	62.496
6468	FBXW4	S33	M48	L1	0.439	0.497	0.619	54.58	-45.06
55294	FBXW7	S653	M137	L84	1	0.915	0.805	21.795	21.075
83953	FCAMR	S227	M106	L60	1	0.995	0.775	-5.841	-23.681
2209	FCGR1A	S154	M1	L5	0.985	0.82	1	-99.925	17.887
115352	FCRL3	S125	M3	L1	0.562	0.93	1	51.067	-72.393
2224	FDPS	S74	M49	L28	1	1	0.66	-2.465	80.997
112812	FDX2	S151	M133	L6	0.943	0.653	0.478	1.474	-9.819
2232	FDXR	S854	M615	L299	1	1	0.995	-22.043	103.306
2235	FECH	S15	M15	L8	1	0.995	0.731	59.691	65.214
56929	FEM1C	S717	M608	L239	0.94	0.855	0.769	-56.995	-32.513
2237	FEN1	S526	M394	L207	1	0.98	0.985	37.34	36.892
2241	FER	S167	M55	L4	0.985	0.844	0.535	-33.869	7.542
55612	FERMT1	S212	M24	L16	0.985	0.535	0.995	8.53	88.777
10979	FERMT2	S37	M10	L10	0.755	0.985	0.945	-80.269	0.314
2864	FFAR1	S445	M339	L180	1	1	0.895	-34.129	44.419
2245	FGD1	S895	M10	L10	0.805	0.98	0.955	-75.514	-2.048
89846	FGD3	S944	M7	L9	0.693	0.554	0.98	-71.876	-40.472
55785	FGD6	S748	M527	L20	0.945	0.755	0.365	-11.641	-5.48
2258	FGF13	S27	M32	L26	0.995	1	0.96	-29.324	-97.513
8074	FGF23	S431	M6	L2	0.585	0.949	0.985	102.475	-13.556
9982	FGFBP1	S209	M2	L2	0.47	0.982	1	96.458	14.219
2260	FGFR1	S319	M50	L31	0.875	0.985	0.775	-61.988	-35.144
11116	FGFR1OP	S53	M59	L3	0.974	0.905	0.445	-49.569	-18.752
2261	FGFR3	S84	M8	L6	0.515	0.995	0.99	15.526	-11.485
2264	FGFR4	S87	M103	L4	0.975	0.585	0.548	-25.165	15.168
2274	FHL2	S788	M512	L263	0.99	1	0.785	66.04	-24.024
84929	FIBCD1	S8	M9	L6	1	0.915	0.99	10.685	-36.035
81608	FIP1L1	S368	M4	L3	0.645	0.777	0.98	-26.406	-9.47
51024	FIS1	S27	M32	L26	0.98	0.985	0.945	-29.416	-98.579
60681	FKBP10	S263	M33	L22	0.605	0.767	0.885	-62.671	41.36
2280	FKBP1A	S654	M451	L80	1	0.73	0.801	15.512	68.094
2281	FKBP1B	S7	M4	L3	0.995	0.995	1	-25.054	-32.298
2288	FKBP4	S143	M138	L85	1	0.885	0.6	1.531	-45.683
23770	FKBP8	S43	M46	L3	1	0.975	0.414	-34.809	-2.763
79147	FKRP	S989	M657	L3	0.537	0	0.521	0.786	21.928
201163	FLCN	S990	M637	L1	0.42	0.43	0.594	31.658	-29.555
2313	FLI1	S443	M360	L158	1	1	0.835	36.547	-47.17
2314	FLII	S774	M535	L3	0.955	0.67	0.96	-18.595	-38.544
10211	FLOT1	S18	M14	L1	0.867	0.626	1	68.632	-50.574
2322	FLT3	S557	M422	L216	0.995	0.975	0.95	-60.797	-24.142
2324	FLT4	S711	M219	L125	0.585	0.884	0.67	-65.929	-50.326
28982	FLVCR1	S681	M640	L66	0.704	0.575	0.225	53.656	-13.248
84256	FLYWCH1	S22	M2	L2	0.847	0.979	1	99.108	32.061
2326	FMO1	S11	M8	L6	0.995	1	0.99	16.137	-21.129
158521	FMR1NB	S126	M80	L46	0.96	0.985	0.9	55.752	22.835
79672	FN3KRP	S507	M372	L17	0.695	0.675	0.193	5.806	-86.961
23360	FNBP4	S714	M5	L7	0.765	0.952	0.995	-35.472	74.322
64778	FNDC3B	S776	M538	L177	1	0.91	0.485	20.205	-30.661
163479	FNDC7	S16	M2	L2	0.965	0.97	1	98.9	4.277
2339	FNTA	S79	M8	L6	0.93	0.714	0.99	9.971	-23.189
2342	FNTB	S716	M562	L89	1	1	0.81	-71.284	75.053
54914	FOCAD	S342	M215	L1	0.87	0.729	0.994	71.41	-45.748
2353	FOS	S23	M22	L4	1	0.98	0.555	-24.119	0.668
8061	FOSL1	S297	M239	L91	1	0.99	0.945	-63.955	-30.6
2355	FOSL2	S60	M77	L32	0.99	0.96	0.865	-45.864	-43.117
3169	FOXA1	S527	M395	L208	0.925	0.895	0.875	32.222	74.224
3171	FOXA3	S408	M330	L3	0.985	0.855	0.43	-36.939	0.434
2303	FOXC2	S282	M232	L150	0.955	0.985	0.653	-22.633	-79.765
2298	FOXD4	S28	M17	L4	1	0.955	0.545	-8.654	13.78
653427	FOXD4L5	S392	M73	L36	1	1	0.985	-77.151	56.926
2304	FOXE1	S399	M324	L159	1	0.995	0.975	23.282	-86.814
55810	FOXJ2	S117	M117	L4	0.98	0.824	0.441	-47.695	8.67
22887	FOXJ3	S197	M9	L6	0.83	0.678	0.99	14.097	-32.014
221937	FOXK1	S223	M179	L99	1	1	0.74	-15.603	48.133
3607	FOXK2	S603	M177	L6	1	0.925	0.816	-0.448	-18.497
668	FOXL2	S489	M272	L12	0.97	0.68	0.29	-37.091	-54.689
2305	FOXM1	S177	M143	L63	1	1	0.935	-60.559	-53.571
8456	FOXN1	S848	M102	L4	0.61	0.975	0.519	1.855	28.368
1112	FOXN3	S142	M8	L6	0.645	0.96	0.99	8.093	-11.778
93986	FOXP2	S473	M319	L167	0.595	0.655	0.456	-32.549	26.963
2356	FPGS	S861	M541	L272	1	1	1	-111.874	47.827
2358	FPR2	S258	M213	L4	1	0.835	0.503	-4.194	19.63
2359	FPR3	S436	M348	L2	0.985	0.735	0.961	81.825	-15.952
10023	FRAT1	S601	M436	L67	1	0.785	0.91	33.372	39.423
100288801	FRG2C	S140	M115	L77	0.632	0.611	0.587	8.685	-85.981
10818	FRS2	S319	M50	L31	0.875	0.985	0.775	-61.877	-35.431
84075	FSCB	S152	M2	L2	0.505	0.41	0.98	79.375	25.382
10468	FST	S320	M261	L146	1	1	0.79	-69.304	-32.502
23105	FSTL4	S182	M13	L1	0.8	0.46	0.985	51.621	-40.952
10841	FTCD	S35	M12	L1	0.98	0.815	0.995	55.867	-36.881
2495	FTH1	S132	M121	L73	1	1	1	-41.714	104.999
117246	FTSJ3	S6	M4	L3	1	0.805	0.995	-28.49	-15.616
8880	FUBP1	S184	M155	L69	1	0.99	0.395	-16.468	-3.634
8939	FUBP3	S205	M183	L96	1	1	0.98	12.232	-59.048
197258	FCSK	S322	M268	L138	1	1	0.855	28.731	-3.509
5045	FURIN	S14	M1	L5	0.975	1	1	-98.891	31.115
2521	FUS	S148	M131	L43	0.965	0.97	0.63	18.644	58.343
170384	FUT11	S153	M72	L1	0.98	0.893	0.926	28.411	-39.537
2524	FUT2	S783	M23	L14	0.805	0.862	0.796	-20.11	36.361
10690	FUT9	S553	M3	L1	0.645	0.875	1	57.217	-61.684
2395	FXN	S581	M440	L217	1	0.99	0.82	-63.202	57.573
53828	FXYD4	S153	M72	L1	1	0.914	0.951	29.005	-39.143
2534	FYN	S420	M338	L3	0.995	0.665	0.36	-25.753	-72.919
8321	FZD1	S226	M190	L14	1	0.795	0.435	-13.655	38.646
11211	FZD10	S798	M66	L38	0.67	0.719	0.531	-11.261	2.398
8322	FZD4	S303	M113	L4	0.995	0.625	0.53	-16.703	3.061
7855	FZD5	S11	M8	L6	0.89	1	0.99	14.698	-14.512
8325	FZD8	S603	M177	L6	1	0.925	0.816	0.007	-19.138
51343	FZR1	S23	M22	L4	0.99	0.98	0.555	-22.642	2.708
50486	G0S2	S486	M366	L18	1	0.497	0.472	32.2	19.724
2549	GAB1	S93	M50	L31	1	1	0.775	-62.03	-37.379
9846	GAB2	S237	M154	L3	0.98	0.905	0.767	-24.543	24.64
11337	GABARAP	S332	M264	L34	1	0.935	0.548	13.317	62.619
2550	GABBR1	S943	M4	L3	0.695	0.86	0.92	-28.458	-40.25
2553	GABPB1	S38	M39	L27	0.528	0.53	0.335	-27.779	16.413
2555	GABRA2	S164	M13	L1	0.97	0.955	0.932	29.394	-45.09
2580	GAK	S108	M78	L19	1	1	0.985	40.508	6.638
2584	GALK1	S157	M102	L4	1	0.99	0.519	0.695	26.76
2585	GALK2	S150	M100	L10	0.784	0.75	0.598	-75.82	-18.002
57452	GALNT16	S818	M577	L251	1	1	1	6.157	105.792
85569	GALP	S57	M5	L7	0.505	1	1	-46.439	88.269
2597	GAPDH	S170	M146	L74	1	1	0.995	-74.562	-84.713
54433	GAR1	S152	M2	L2	0.955	0.527	1	77.849	26.052
2617	GARS	S20	M1	L5	0.725	0.99	1	-94.877	36.144
2618	GART	S24	M24	L16	1	1	1	3.174	86.278
2619	GAS1	S21	M16	L8	1	0.69	0.714	72.346	49.02
10634	GAS2L1	S363	M282	L2	0.985	0.935	1	103.457	24.741
2623	GATA1	S205	M183	L96	1	1	0.98	13.497	-60.489
2625	GATA3	S558	M178	L109	0.99	0.915	0.47	-62.073	-69.017
2627	GATA6	S811	M5	L7	0.83	0.947	0.995	-53.739	81.569
57798	GATAD1	S248	M140	L24	0.98	0.97	0.794	29.457	-74.18
54815	GATAD2A	S740	M503	L304	1	1	0.99	-108.978	1.3
57459	GATAD2B	S47	M61	L24	1	1	0.775	38.367	-72.067
8729	GBF1	S470	M353	L163	0.995	0.995	0.94	54.889	36.027
2729	GCLC	S492	M421	L3	0.975	0.795	0.431	-37.119	22.154
10985	GCN1	S474	M357	L166	1	1	0.995	-105.971	-11.489
2651	GCNT2	S3	M3	L1	0.797	1	1	45.16	-62.396
2668	GDNF	S342	M215	L1	0.955	0.815	0.961	71.06	-44.026
8487	GEMIN2	S570	M52	L3	0.585	0.656	0.342	-22.54	-51.919
50628	GEMIN4	S50	M52	L3	0.925	0.828	0.467	-25.04	-53.904
25929	GEMIN5	S475	M170	L18	0.885	0.95	0.487	32.031	23.585
79833	GEMIN6	S327	M5	L7	0.926	0.992	1	-38.549	82.531
79760	GEMIN7	S290	M26	L7	0.77	0.47	1	-36.708	88.116
8328	GFI1B	S8	M9	L6	1	0.915	0.99	11.307	-35.03
85476	GFM1	S174	M15	L8	0.925	0.695	0.72	69.914	55.801
2673	GFPT1	S106	M99	L65	0.495	0.53	0.55	-53.406	95.038
23062	GGA2	S50	M52	L3	1	0.84	0.467	-25.619	-57.338
23163	GGA3	S163	M145	L57	0.956	0.91	0.45	-7.386	-76.72
2677	GGCX	S691	M500	L261	0.99	0.89	0.81	-64.936	65.869
9453	GGPS1	S500	M3	L1	0.75	0.73	0.985	57.865	-57.477
91227	GGTLC2	S270	M1	L5	0.765	0.947	1	-103.356	33.524
2692	GHRHR	S3	M3	L1	1	1	1	51.703	-59.847
9837	GINS1	S147	M130	L11	0.96	0.7	0.949	-24.179	63.091
51659	GINS2	S147	M130	L11	0.96	0.7	0.949	-23.245	63.524
64785	GINS3	S98	M95	L58	1	1	1	44.059	-100.768
84296	GINS4	S147	M130	L11	0.96	0.7	0.949	-23.555	63.379
10755	GIPC1	S120	M120	L37	1	1	0.725	-97.354	-19.019
2696	GIPR	S708	M14	L1	0.505	0.685	1	72.427	-49.505
2700	GJA3	S138	M25	L4	0.859	0.538	0.5	-40.534	16.787
349149	GJC3	S313	M259	L120	1	0.98	0.245	-8.76	-69.643
56287	GKN1	S369	M67	L3	0.74	0.971	0.84	-20.494	-16.618
89944	GLB1L2	S1	M6	L2	0.891	0.965	1	86.677	-14.895
26035	GLCE	S11	M8	L6	0.995	1	0.99	14.44	-17.394
342035	GLDN	S555	M420	L15	1	0.975	0.523	-54.306	-37.104
2733	GLE1	S591	M1	L5	0.65	0.497	0.94	-83.967	37.519
2735	GLI1	S68	M66	L38	1	1	0.985	36.629	-7.751
11010	GLIPR1	S446	M358	L1	0.92	0.895	0.53	56.181	-20.805
256710	GLIPR1L1	S457	M314	L1	1	0.94	0.973	66.906	-68.322
144321	GLIPR1L2	S991	M2	L2	0.66	0.417	0.985	83.967	11.301
51031	GLOD4	S246	M127	L81	0.969	0.99	0.825	84.161	4.334
9340	GLP2R	S411	M332	L1	1	0.88	0.939	33.524	-52.615
2744	GLS	S785	M24	L16	0.87	0.535	1	10.158	90.393
2752	GLUL	S210	M29	L3	0.57	0.757	0.472	-28.733	-61.004
389396	GLYATL3	S133	M6	L2	0.695	0.945	1	81.304	-8.256
84656	GLYR1	S410	M142	L3	0.985	0.595	0.442	-27.547	-51.735
10691	GMEB1	S856	M618	L281	1	1	0.995	-12.622	-93.901
51053	GMNN	S238	M195	L20	1	0.94	0.416	-11.083	-32.78
8833	GMPS	S24	M24	L16	1	1	1	4.406	82.955
2770	GNAI1	S559	M106	L60	0.76	0.905	0.751	-2.46	-26.277
2771	GNAI2	S319	M50	L31	0.875	0.985	0.775	-63.255	-35.824
2773	GNAI3	S528	M424	L39	1	0.6	0.374	-8.423	-12.111
2778	GNAS	S34	M20	L13	0.985	0.985	0.92	-3.479	54.984
2782	GNB1	S950	M591	L10	1	0.985	0.856	-86.621	-2.482
54584	GNB1L	S275	M226	L6	1	0.995	0.938	20.089	-4.265
2783	GNB2	S37	M10	L10	0.581	0.985	0.945	-83.525	0.978
2784	GNB3	S835	M595	L265	0.975	0.815	0.704	-44.44	21.352
10681	GNB5	S134	M101	L6	0.975	0.82	0.982	5.215	-13.605
10020	GNE	S462	M318	L179	1	1	0.875	72.378	-21.642
2787	GNG5	S138	M25	L4	0.8	0.729	0.523	-37.164	16.277
2788	GNG7	S496	M457	L198	0.99	0.88	0.59	26.469	-8.332
29889	GNL2	S36	M35	L3	0.995	0.97	0.595	-41.328	37.664
26354	GNL3	S401	M325	L3	0.965	0.65	0.595	-46.243	35.544
54552	GNL3L	S73	M7	L9	0.925	0.903	1	-87.716	-43.547
10578	GNLY	S28	M17	L4	1	0.955	0.545	-7.13	16.122
27232	GNMT	S97	M109	L15	1	0.95	0.405	-58.762	-15.442
132789	GNPDA2	S366	M285	L1	1	0.995	0.922	79.388	-54.95
64841	GNPNAT1	S528	M424	L39	1	0.6	0.374	-8.757	-11.534
2797	GNRH2	S4	M7	L9	0.995	1	1	-80.217	-41.216
2798	GNRHR	S48	M29	L3	0.964	0.99	0.45	-30.45	-64.058
342096	GOLGA6A	S2	M5	L7	1	1	1	-49.944	78.74
55889	GOLGA6B	S49	M2	L2	0.785	0.526	1	79.116	21.39
653643	GOLGA6D	S755	M6	L2	0.47	0.948	0.995	96.219	-4.659
55204	GOLPH3L	S91	M2	L2	0.72	0.909	1	86.706	18.366
9570	GOSR2	S51	M1	L5	0.58	1	1	-89.174	33.261
2806	GOT2	S231	M194	L103	1	1	1	-70.35	15.239
10223	GPA33	S587	M444	L6	0.975	0.57	0.975	26.769	-15.787
57678	GPAM	S3	M3	L1	0.983	0.979	1	50.242	-65.731
151306	GPBAR1	S734	M22	L4	0.96	0.987	0.535	-23.527	-2.829
2719	GPC3	S610	M429	L29	0.995	0.7	0.395	-11.598	-1.204
2821	GPI	S170	M146	L74	1	1	0.995	-73.755	-83.484
338328	GPIHBP1	S183	M4	L3	0.54	0.925	1	-17.193	-26.921
27238	GPKOW	S703	M476	L7	0.965	0.9	0.55	-51.811	68.842
2823	GPM6A	S218	M163	L2	1	0.895	1	102.813	14.405
11321	GPN1	S14	M1	L5	0.97	1	1	-97.044	30.34
54707	GPN2	S2	M5	L7	1	1	1	-47.408	78.284
51184	GPN3	S475	M170	L18	0.808	0.935	0.485	33.679	24.265
56927	GPR108	S1	M6	L2	0.98	0.965	1	86.514	-8.911
64582	GPR135	S635	M383	L57	0.98	0.695	0.261	-12.276	-82.356
56834	GPR137	S194	M167	L2	1	0.995	0.981	96.333	-22.32
134391	GPR151	S466	M283	L3	1	0.65	0.635	-20.811	-44.641
387509	GPR153	S371	M302	L3	1	0.965	0.32	-28.901	-75.384
80045	GPR157	S3	M3	L1	0.947	1	1	51.759	-57.683
27239	GPR162	S197	M9	L6	0.46	0.79	0.99	11.981	-31.556
2840	GPR17	S572	M378	L50	1	0.995	0.427	-5.954	-82.041
54328	GPR173	S519	M453	L204	1	1	0.75	-30.562	-81.032
11318	GPR182	S618	M92	L3	0.77	0.628	0.588	-22.631	-46.86
2857	GPR34	S176	M92	L3	0.975	0.916	0.49	-35.773	-62.303
11250	GPR45	S593	M456	L122	0.975	0.935	0.795	63.045	-12.165
2830	GPR6	S151	M133	L6	0.995	0.94	0.823	3.402	-9.465
8111	GPR68	S211	M187	L3	1	0.555	0.467	-24.052	-61.298
53831	GPR84	S104	M98	L64	1	0.985	0.475	-44.487	-59.996
222545	GPRC6A	S77	M88	L4	0.995	0.817	0.482	-32.629	17.939
2873	GPS1	S85	M74	L47	1	0.985	0.88	-12.937	-27.747
2879	GPX4	S292	M235	L119	1	1	0.65	-61.693	92.925
493869	GPX8	S605	M459	L7	0.88	0.725	0.73	-55.697	85.153
2885	GRB2	S93	M50	L31	1	1	0.775	-61.269	-38.288
2886	GRB7	S222	M47	L17	1	0.64	0.555	-48.748	-6.033
26585	GREM1	S3	M3	L1	1	1	1	53.012	-63.187
9380	GRHPR	S853	M613	L275	1	1	0.93	12.525	75.281
116443	GRIN3A	S846	M147	L3	0.595	0.472	0.945	-44.583	-29.201
116444	GRIN3B	S4	M7	L9	0.995	1	1	-81.743	-42.269
156	GRK2	S222	M47	L17	0.995	0.645	0.555	-48.073	-6.131
157	GRK3	S48	M29	L3	1	0.98	0.46	-28.121	-67.437
2868	GRK4	S878	M7	L9	0.681	1	1	-77.69	-48.768
131890	GRK7	S289	M231	L92	0.995	0.965	0.77	-0.087	-31.711
2913	GRM3	S244	M199	L3	0.944	0.944	0.231	-13.534	-59.667
2914	GRM4	S24	M24	L16	0.965	0.975	0.975	3.144	81.291
80273	GRPEL1	S203	M181	L2	0.995	0.717	0.761	83.952	39.044
2926	GRSF1	S261	M18	L8	0.67	0.965	0.753	50.138	48.931
83743	GRWD1	S116	M11	L11	0.58	0.942	0.908	-30.176	66.351
79792	GSDMD	S468	M317	L2	0.775	0.744	0.983	82.482	-1.145
2935	GSPT1	S6	M4	L3	1	0.805	0.995	-29.709	-15.174
2939	GSTA2	S186	M7	L9	0.955	0.535	0.99	-72.938	-38.457
2941	GSTA4	S527	M395	L208	0.95	0.91	0.875	31.571	74.797
221357	GSTA5	S6	M4	L3	0.713	0.75	0.985	-25.752	-21.678
2949	GSTM5	S546	M407	L88	0.99	0.93	0.442	-78.682	-55.931
2954	GSTZ1	S303	M113	L4	0.93	0.62	0.53	-16.153	1.459
170825	GSX2	S308	M251	L133	0.975	0.985	0.97	-18.376	92.414
11036	GTF2A1L	S33	M48	L1	0.955	0.658	0.995	49.034	-44.59
2958	GTF2A2	S89	M1	L5	0.553	0.99	1	-102.11	31.069
2959	GTF2B	S283	M267	L135	0.995	0.995	0.995	-56.727	54.163
2960	GTF2E1	S311	M33	L22	0.55	1	0.715	-80.824	-70.175
2961	GTF2E2	S236	M182	L30	0.812	0.805	0.405	35.59	29.57
2962	GTF2F1	S236	M182	L30	0.812	0.805	0.405	35.607	29.206
2963	GTF2F2	S295	M89	L56	1	0.62	0.989	-15.327	73.937
2965	GTF2H1	S43	M46	L3	0.955	0.93	0.377	-37.577	-81.913
2966	GTF2H2	S480	M71	L42	0.865	0.911	0.701	-22.184	-5.77
2967	GTF2H3	S461	M288	L165	0.945	0.96	0.915	26.356	67.863
2968	GTF2H4	S643	M386	L9	0.84	0.57	0.676	-84.375	-29.781
2971	GTF3A	S891	M602	L107	1	1	0.528	-54.152	-82.603
2975	GTF3C1	S796	M601	L262	0.99	0.83	0.415	24.385	27.545
2976	GTF3C2	S62	M25	L4	0.988	0.9	0.513	-33.129	11.989
9330	GTF3C3	S796	M601	L262	0.99	0.83	0.415	24.342	27.546
9329	GTF3C4	S412	M309	L3	1	0.98	0.56	-39.203	44.018
9328	GTF3C5	S19	M1	L5	0.84	0.98	1	-88.965	22.966
112495	GTF3C6	S622	M433	L2	0.99	0.94	0.86	77.441	-12.919
9567	GTPBP1	S8	M9	L6	1	0.915	0.99	9.215	-34.803
85865	GTPBP10	S648	M346	L8	1	1	0.492	40.844	67.933
84705	GTPBP3	S65	M8	L6	0.72	0.985	0.99	9.988	-16.934
23560	GTPBP4	S55	M54	L3	0.988	0.51	0.595	-39.587	31.641
51512	GTSE1	S108	M78	L19	1	1	0.985	40.443	6.868
2984	GUCY2C	S103	M97	L12	0.995	0.905	0.435	-39.651	-73.193
3000	GUCY2D	S10	M11	L11	0.995	0.995	0.96	-36.333	58.756
2986	GUCY2F	S48	M29	L3	1	0.98	0.46	-28.986	-66.331
2987	GUK1	S206	M186	L104	1	1	0.985	8.296	72.487
2997	GYS1	S140	M115	L77	0.632	0.611	0.587	8.606	-85.318
3001	GZMA	S646	M376	L1	1	0.91	1	44.538	-79.664
3002	GZMB	S183	M4	L3	0.54	0.925	1	-17.171	-27.95
3005	H1F0	S858	M621	L234	1	1	0.99	31.931	-9.469
8971	H1FX	S78	M56	L6	0.99	0.65	0.975	25.246	-18.598
94239	H2AFV	S3	M3	L1	0.984	0.995	1	53.449	-55.336
3015	H2AFZ	S92	M107	L33	0.995	0.99	0.855	-20.017	52.351
3020	H3F3A	S114	M11	L11	0.615	0.84	0.965	-29.406	57.624
3021	H3F3B	S78	M56	L6	0.99	0.65	0.975	23.731	-18.901
23498	HAAO	S300	M244	L6	1	0.935	0.955	29.251	-18.906
201562	HACD2	S1	M6	L2	0.985	0.965	1	87.41	-10.246
401494	HACD4	S124	M14	L1	0.94	0.451	1	66.762	-53.839
3033	HADH	S306	M247	L131	1	1	1	30.255	-89.495
3030	HADHA	S60	M77	L32	0.98	0.955	0.86	-44.715	-44.785
3034	HAL	S769	M29	L3	0.585	0.888	0.462	-28.646	-57.991
57817	HAMP	S57	M5	L7	0.505	1	1	-47.447	89.207
1404	HAPLN1	S149	M132	L4	0.853	0.722	0.434	-23.006	5.242
3035	HARS	S51	M1	L5	0.58	1	1	-90.333	33.418
23438	HARS2	S12	M18	L8	0.94	0.975	0.758	50.104	50.839
3037	HAS2	S491	M110	L12	0.815	0.862	0.325	-34.614	-53.618
115106	HAUS1	S683	M477	L6	0.995	0.86	0.555	24.313	-12.486
55142	HAUS2	S127	M87	L2	0.66	0.47	0.922	83.389	24.997
79441	HAUS3	S127	M87	L2	0.955	0.455	0.596	47.446	12.323
54801	HAUS6	S127	M87	L2	0.97	0.46	0.576	47.655	13.449
26959	HBP1	S437	M336	L3	0.84	0.492	0.51	-18.373	-42.972
10767	HBS1L	S7	M4	L3	0.965	0.995	1	-24.663	-34.502
3052	HCCS	S12	M18	L8	1	0.975	0.758	48.697	53.714
3054	HCFC1	S227	M106	L60	1	0.995	0.775	-7.035	-24.008
3061	HCRTR1	S103	M97	L12	0.979	0.889	0.42	-37.221	-73.704
3065	HDAC1	S103	M97	L12	0.995	0.905	0.435	-38.659	-71.019
83933	HDAC10	S94	M105	L61	0.898	0.995	0.8	-84.737	-17.033
79885	HDAC11	S53	M59	L3	0.641	0.777	0.363	-64.745	-45.14
8841	HDAC3	S335	M266	L94	1	1	0.995	-62.72	-4.404
9759	HDAC4	S324	M218	L130	0.978	0.952	0.884	41.139	-76.557
55869	HDAC8	S286	M233	L1	1	0.98	1	77.634	-67.446
154150	HDGFL1	S846	M147	L3	0.595	0.472	0.945	-44.203	-29.284
27440	HDHD5	S148	M131	L43	1	0.99	0.64	18.711	60.472
139324	HDX	S360	M13	L1	0.485	0.76	0.995	45.649	-39.588
55127	HEATR1	S25	M21	L2	0.99	0.665	1	78.207	29.31
55027	HEATR3	S246	M127	L81	0.995	0.99	0.8	85.468	3.026
256957	HEATR9	S95	M93	L2	1	0.925	0.767	80.645	41.394
50865	HEBP1	S109	M2	L2	0.885	0.867	0.995	83.549	31.08
25831	HECTD1	S338	M208	L129	1	1	1	58.378	93.46
79654	HECTD3	S7	M4	L3	0.787	0.99	1	-26.442	-33.925
57520	HECW2	S441	M291	L53	0.575	0.945	0.79	-38.937	-40.046
9931	HELZ	S6	M4	L3	0.914	0.805	0.995	-26.287	-20.294
253012	HEPACAM2	S104	M98	L64	1	0.959	0.455	-42.265	-61.67
9843	HEPH	S992	M304	L145	0.505	0.671	0.89	39.507	-84.841
8924	HERC2	S407	M278	L80	0.99	0.985	0.753	19.204	70.254
51191	HERC5	S53	M59	L3	0.974	0.905	0.445	-49.102	-19.099
390992	HES3	S41	M17	L4	0.547	0.735	0.545	-11.882	22.316
84667	HES7	S4	M7	L9	1	1	1	-74.126	-41.07
124790	HEXIM2	S639	M6	L2	0.49	0.938	1	91.604	-15.785
23493	HEY2	S87	M103	L4	0.948	0.545	0.543	-21.429	17.438
9146	HGS	S239	M12	L1	0.764	0.545	0.98	62.289	-39.144
192286	HIGD2A	S4	M7	L9	0.995	1	1	-81.822	-40.066
51501	HIKESHI	S136	M16	L8	0.635	0.694	0.707	68.133	44.88
25988	HINFP	S20	M1	L5	0.42	0.985	1	-100.901	33.289
135114	HINT3	S386	M306	L184	1	1	0.875	61.696	-83.369
3092	HIP1	S59	M43	L4	0.995	0.86	0.545	-8.979	5.865
204851	HIPK1	S244	M199	L3	0.944	0.944	0.231	-13.399	-59.518
10114	HIPK3	S650	M59	L3	0.59	0.63	0.445	-46.848	-17.929
7290	HIRA	S827	M588	L52	1	0.98	0.923	51.487	21.159
3008	HIST1H1E	S747	M509	L10	1	1	0.88	-77.654	4.284
8334	HIST1H2AC	S107	M3	L1	0.487	0.98	1	65.227	-65.824
3013	HIST1H2AD	S11	M8	L6	1	1	0.99	16.111	-17.958
8329	HIST1H2AI	S50	M52	L3	1	0.84	0.467	-24.822	-56.475
8347	HIST1H2BC	S27	M32	L26	1	1	0.96	-27.243	-93.638
3017	HIST1H2BD	S254	M206	L116	0.958	0.888	0.57	7.689	-66.285
8344	HIST1H2BE	S271	M139	L87	1	0.95	0.63	-48.144	64
8343	HIST1H2BF	S523	M464	L93	0.87	1	0.965	34.839	47.47
8345	HIST1H2BH	S922	M592	L3	0.97	0.91	0.797	-33.631	-11.778
8340	HIST1H2BL	S126	M80	L46	0.99	0.97	0.907	55.924	24.728
8342	HIST1H2BM	S80	M1	L5	0.516	0.611	1	-103.626	22.409
8341	HIST1H2BN	S271	M139	L87	0.889	0.84	0.57	-47.395	63.321
8348	HIST1H2BO	S156	M36	L23	1	1	0.965	-46.484	44.804
8350	HIST1H3A	S220	M193	L95	1	0.98	0.935	51.615	-6.842
8352	HIST1H3C	S795	M563	L294	0.96	0.805	0.71	-45.81	53.629
8366	HIST1H4B	S1	M6	L2	0.87	0.964	1	96.338	-7.629
8364	HIST1H4C	S71	M90	L4	0.995	0.915	0.515	6.064	17.254
8338	HIST2H2AC	S19	M1	L5	0.715	0.97	1	-92.463	22.888
653604	HIST2H3D	S161	M1	L5	0.64	0.81	1	-102.395	18.657
8290	HIST3H3	S122	M38	L12	0.745	0.76	0.435	-53.445	-63.727
59269	HIVEP3	S705	M468	L4	0.925	0.465	0.44	-22.042	22.481
55355	HJURP	S2	M5	L7	0.44	0.944	0.99	-39.937	80.679
148738	HJV	S579	M465	L8	0.755	0.765	0.489	60.754	53.111
3099	HK2	S13	M19	L8	0.995	0.545	0.769	52.524	68.742
3107	HLA-C	S103	M97	L12	0.995	0.905	0.435	-37.513	-71.583
3131	HLF	S993	M658	L6	0.285	0.337	0.385	-3.833	-15.965
6596	HLTF	S274	M225	L141	1	0.98	0.77	-45.139	-49.987
10363	HMG20A	S678	M365	L154	0.51	0.965	0.495	34.013	-0.39
8091	HMGA2	S317	M84	L4	0.9	0.694	0.469	-12.44	31.953
3146	HMGB1	S34	M20	L13	0.947	0.995	0.915	-1.254	52.301
54511	HMGCLL1	S69	M53	L1	0.53	0.513	0.949	76.252	-61.526
3157	HMGCS1	S80	M1	L5	0.98	0.582	1	-103.513	25.8
22993	HMGXB3	S1	M6	L2	0.858	0.945	1	86.176	-18.082
340784	HMX3	S6	M4	L3	0.869	0.805	0.995	-20.919	-12.251
6927	HNF1A	S179	M25	L4	0.51	0.594	0.434	-46.935	0.555
6928	HNF1B	S9	M10	L10	0.945	1	0.95	-79.119	-10.107
3172	HNF4A	S643	M386	L9	0.84	0.57	0.676	-84.235	-29.859
10949	HNRNPA0	S262	M216	L6	0.995	0.865	0.985	19.369	-9.4
3178	HNRNPA1	S910	M531	L284	1	1	0.985	-53.595	-21.738
3181	HNRNPA2B1	S295	M89	L56	1	0.62	0.989	-14.256	72.665
220988	HNRNPA3	S910	M531	L284	1	1	0.985	-53.583	-21.742
3182	HNRNPAB	S225	M173	L49	0.952	0.59	0.475	-28.32	29.196
3183	HNRNPC	S429	M349	L160	0.99	0.905	0.71	-60.573	-72.597
343069	HNRNPCL1	S97	M109	L15	1	0.95	0.405	-59.695	-15.169
3184	HNRNPD	S139	M71	L42	0.995	1	0.91	4.785	-52.038
9987	HNRNPDL	S41	M17	L4	0.918	0.862	0.545	-12.126	24.17
3185	HNRNPF	S887	M16	L8	0.97	0.658	0.714	74.094	46.34
3187	HNRNPH1	S458	M1	L5	0.64	0.901	0.995	-89.624	37.241
3190	HNRNPK	S293	M34	L1	0.5	0.439	0.99	44.753	-25.411
3191	HNRNPL	S298	M240	L124	1	0.99	0.668	67.785	-37.773
4670	HNRNPM	S184	M155	L69	1	0.99	0.395	-17.201	-3.486
10236	HNRNPR	S148	M131	L43	1	0.99	0.64	17.009	60.718
3192	HNRNPU	S451	M280	L156	1	0.975	0.625	10.526	30.408
221092	HNRNPUL2	S4	M7	L9	1	1	1	-77.834	-41.567
9454	HOMER3	S746	M492	L3	0.995	0.975	0.981	-36.496	-43.156
57594	HOMEZ	S3	M3	L1	0.984	0.995	1	51.804	-55.165
150280	HORMAD2	S361	M2	L2	0.935	0.669	1	100.765	9.315
3207	HOXA11	S437	M336	L3	0.96	0.55	0.448	-29.71	-3.921
3199	HOXA2	S522	M246	L127	0.945	0.93	0.583	-18.285	-48.65
3200	HOXA3	S60	M77	L32	0.99	0.96	0.865	-47.064	-43.241
3203	HOXA6	S30	M37	L4	0.995	0.955	0.543	-17.718	13.52
3216	HOXB6	S559	M106	L60	0.76	0.905	0.751	-2.275	-26.394
3217	HOXB7	S30	M37	L4	1	0.955	0.543	-17.021	9.3
3218	HOXB8	S994	M37	L4	0.276	0.569	0.548	-8.344	20.184
3229	HOXC13	S942	M5	L7	0.533	0.964	0.995	-33	75.337
3223	HOXC6	S46	M58	L35	1	1	0.985	-64.59	23.081
3236	HOXD10	S306	M247	L131	1	1	1	29.466	-89.963
3235	HOXD9	S199	M176	L6	0.79	0.721	0.959	-0.521	-27.393
51440	HPCAL4	S651	M434	L199	0.577	0.629	0.466	-53.807	14.339
3242	HPD	S27	M32	L26	0.975	0.975	0.935	-29.986	-93.787
3257	HPS1	S47	M61	L24	1	1	0.775	39.038	-71.682
11234	HPS5	S780	M594	L6	0.925	0.64	0.956	12.372	-24.884
10855	HPSE	S123	M4	L3	0.378	1	1	-27.883	-27.323
3265	HRAS	S441	M291	L53	0.63	1	0.8	-57.935	-19.687
57110	PLAAT1	S415	M335	L183	1	0.98	0.318	-43.404	15.868
11255	HRH3	S59	M43	L4	0.995	0.86	0.545	-9.418	6.019
9653	HS2ST1	S47	M61	L24	1	1	0.785	35.5	-72.248
9956	HS3ST2	S167	M55	L4	0.985	0.845	0.535	-32.678	7.455
9951	HS3ST4	S341	M256	L49	0.96	0.985	0.425	-28.591	35.577
266722	HS6ST3	S614	M53	L1	0.51	0.782	0.845	25.23	-61.224
440498	HSBP1L1	S1	M6	L2	0.856	0.954	1	85.468	-5.592
150274	HSCB	S581	M440	L217	1	0.99	0.82	-63.139	58.018
3290	HSD11B1	S638	M460	L229	1	0.995	0.69	-11.706	43.794
374875	HSD11B1L	S321	M8	L6	0.515	1	0.99	13.345	-11.902
3028	HSD17B10	S648	M346	L8	1	1	0.492	41.353	68.499
51144	HSD17B12	S8	M9	L6	0.79	0.915	0.99	8.645	-31.635
345275	HSD17B13	S748	M527	L20	0.945	0.755	0.365	-11.617	-5.413
51171	HSD17B14	S86	M38	L12	1	0.939	0.46	-49.249	-62.668
3295	HSD17B4	S214	M174	L108	0.965	0.99	0.965	-62.074	8.667
80270	HSD3B7	S17	M13	L1	0.986	0.915	0.995	43.207	-35.59
3297	HSF1	S954	M26	L7	0.73	0.68	0.995	-28.699	86.062
3320	HSP90AA1	S769	M29	L3	0.585	0.888	0.462	-28.175	-57.518
3326	HSP90AB1	S245	M200	L144	0.98	0.95	0.435	20.39	35.208
7184	HSP90B1	S305	M236	L23	0.975	0.975	0.682	-57.25	45.798
51182	HSPA14	S299	M257	L3	0.995	0.45	0.595	-41.512	31.01
3304	HSPA1B	S11	M8	L6	1	1	0.99	15.119	-18.199
3309	HSPA5	S2	M5	L7	0.995	1	1	-46.542	83.955
3312	HSPA8	S544	M35	L3	0.92	0.958	0.598	-41.333	41.021
3313	HSPA9	S293	M34	L1	0.563	0.444	0.99	43.45	-25.064
51668	HSPB11	S63	M34	L1	0.93	0.48	0.995	46.888	-28.886
3329	HSPD1	S160	M104	L62	1	1	1	46.946	80.888
3336	HSPE1	S160	M104	L62	1	1	1	46.802	80.25
3339	HSPG2	S995	M296	L1	0.91	0.348	0.508	40.674	-85.06
27336	HTATSF1	S427	M116	L54	1	1	0.796	21.714	50.155
3350	HTR1A	S344	M4	L3	0.915	0.538	1	-32.213	-32.762
27429	HTRA2	S457	M314	L1	1	0.94	0.973	67.444	-69.6
3064	HTT	S996	M53	L1	0.6	0.854	0.94	32.883	-60.667
3364	HUS1	S240	M197	L4	1	0.775	0.342	14.432	3.951
10075	HUWE1	S228	M175	L41	1	0.99	0.925	17.854	15.655
10525	HYOU1	S536	M463	L5	0.985	0.675	0.95	-80.808	21.911
285148	IAH1	S1	M6	L2	0.985	0.965	1	87.198	-11.015
3376	IARS	S247	M269	L1	0.97	0.63	1	59.275	-74.425
55699	IARS2	S160	M104	L62	1	1	1	46.741	79.641
200205	IBA57	S26	M26	L7	0.985	0.715	1	-30.232	92.463
3386	ICAM4	S587	M444	L6	0.975	0.57	0.975	27.109	-16.886
79664	ICE2	S454	M289	L107	0.86	0.745	0.497	-57.154	1.08
22858	ICK	S249	M202	L111	1	0.985	0.545	-41.43	-50.882
3399	ID3	S101	M108	L39	0.923	0.919	0.35	-3.17	-12.467
3400	ID4	S997	M66	L38	0	0.98	0.97	37.784	-9.537
3419	IDH3A	S549	M410	L16	1	1	0.956	7.819	81.168
3422	IDI1	S634	M438	L201	0.79	0.695	0.545	-90.617	11.562
8870	IER3	S222	M47	L17	0.99	0.645	0.555	-47.94	-6.933
51124	IER3IP1	S630	M437	L196	1	0.99	0.899	72.179	-9.271
3428	IFI16	S613	M3	L1	0.805	0.824	0.95	51.093	-69.23
10437	IFI30	S171	M12	L1	0.87	0.775	0.995	49.202	-34.576
3430	IFI35	S538	M9	L6	0.65	0.913	0.99	7.154	-38.057
439996	IFIT1B	S1	M6	L2	0.879	0.96	1	87.867	-17.272
10581	IFITM2	S2	M5	L7	0.941	1	1	-52.939	76.47
10410	IFITM3	S859	M496	L7	0.975	0.93	0.973	-51.82	74.222
3447	IFNA13	S523	M464	L93	0.865	0.995	0.96	35.372	47.14
3441	IFNA4	S35	M12	L1	0.98	0.815	0.995	54.407	-35.126
3442	IFNA5	S655	M389	L1	0.975	0.625	0.99	35.664	-35.708
338376	IFNE	S18	M14	L1	1	0.655	1	73.798	-53.465
163702	IFNLR1	S103	M97	L12	0.69	0.65	0.291	-38.996	-72.127
9742	IFT140	S344	M4	L3	0.915	0.551	1	-31.219	-31.019
56912	IFT46	S47	M61	L24	0.995	0.995	0.775	37.058	-70.52
3476	IGBP1	S591	M1	L5	0.65	0.497	0.94	-83.078	37.418
3480	IGF1R	S305	M236	L23	1	1	0.706	-57.051	46.598
3481	IGF2	S647	M304	L145	1	0.995	0.93	10.317	-46.187
10642	IGF2BP1	S29	M40	L15	0.9	1	0.635	-55.581	-41.019
10644	IGF2BP2	S595	M10	L10	0.775	1	0.95	-75.025	-5.556
10643	IGF2BP3	S295	M89	L56	1	0.62	0.989	-14.565	73.983
3483	IGFALS	S4	M7	L9	0.972	0.995	1	-75.112	-46.46
3485	IGFBP2	S3	M3	L1	0.985	1	1	53.592	-66.437
3490	IGFBP7	S231	M194	L103	1	1	1	-70.514	15.613
347252	IGFBPL1	S5	M2	L2	0.995	1	1	97.3	19.371
374918	IGFL1	S1	M6	L2	0.819	0.96	1	96.327	-11.928
79713	IGFLR1	S1	M6	L2	0.819	0.96	1	95.939	-12.536
3543	IGLL1	S18	M14	L1	0.935	0.662	1	69.87	-51.377
285313	IGSF10	S5	M2	L2	0.736	1	1	91.983	18.461
3549	IHH	S706	M22	L4	0.875	0.843	0.555	-12.916	6.332
3550	IK	S43	M46	L3	0.965	0.964	0.419	-33.608	-1.657
3551	IKBKB	S37	M10	L10	0.755	0.985	0.945	-80.951	2.99
8517	IKBKG	S149	M132	L4	0.995	0.925	0.379	-17.837	19.553
22806	IKZF3	S250	M207	L142	1	0.99	0.825	-66.975	5.667
3596	IL13	S400	M14	L1	0.75	0.613	1	70.186	-56.609
27189	IL17C	S723	M585	L1	0.93	0.43	0.995	76.484	-48.963
23765	IL17RA	S489	M272	L12	0.955	0.665	0.285	-38.712	-54.927
8809	IL18R1	S108	M78	L19	0.925	0.965	0.965	41.762	5.718
29949	IL19	S640	M381	L1	0.98	0.575	1	62.256	-71.324
3552	IL1A	S518	M34	L1	0.545	0.357	0.979	41.595	-29.592
84639	IL1F10	S107	M3	L1	0.487	0.98	1	64.754	-65.776
9173	IL1RL1	S856	M618	L281	1	1	0.995	-12.613	-93.903
8808	IL1RL2	S76	M64	L1	0.979	0.955	0.921	23.072	-51.663
50616	IL22	S107	M3	L1	0.442	0.98	1	62.442	-67.039
51561	IL23A	S293	M34	L1	0.563	0.444	0.99	43.305	-24.86
9466	IL27RA	S17	M13	L1	0.745	0.832	0.995	40.348	-39.239
9235	IL32	S403	M327	L1	0.905	0.44	0.995	46.241	-45.868
146433	IL34	S16	M2	L2	0.874	0.97	1	95.328	9.471
27178	IL37	S998	M13	L1	0.706	0.372	0.995	44.285	-32.613
3570	IL6R	S525	M455	L213	1	0.96	0.595	-33.02	-95.638
3608	ILF2	S224	M172	L105	1	1	1	-52.672	31.266
3609	ILF3	S224	M172	L105	1	1	1	-52.575	31.331
3611	ILK	S9	M10	L10	1	1	0.95	-80.832	-6.561
10989	IMMT	S95	M93	L2	1	0.925	0.767	80.996	41.393
55272	IMP3	S2	M5	L7	0.915	1	1	-55.212	78.343
92856	IMP4	S164	M13	L1	0.97	0.955	0.932	31.622	-45.506
55364	IMPACT	S402	M43	L4	0.595	0.813	0.535	-5.972	9.993
3614	IMPDH1	S8	M9	L6	0.808	0.791	0.84	8.527	-37.147
3615	IMPDH2	S24	M24	L16	1	1	1	5.372	84.966
3619	INCENP	S58	M83	L44	0.995	0.995	0.965	28.71	57.352
3622	ING2	S79	M8	L6	0.93	0.714	0.99	8.978	-24.072
54556	ING3	S9	M10	L10	0.995	1	0.95	-81.932	-9.407
3623	INHA	S35	M12	L1	0.851	0.82	0.995	53.43	-32.599
54617	INO80	S312	M258	L140	1	1	1	-99.844	-68.289
283899	INO80E	S312	M258	L140	1	1	1	-99.119	-68.049
56623	INPP5E	S12	M18	L8	0.986	0.97	0.753	48.312	57.633
3636	INPPL1	S90	M57	L4	1	0.473	0.525	-6.022	0.42
3630	INS	S262	M216	L6	0.995	0.865	0.985	18.851	-8.854
3638	INSIG1	S1	M6	L2	0.746	0.964	1	87.776	-4.051
55174	INTS10	S409	M2	L2	0.595	0.993	0.985	90.298	15.536
54973	INTS11	S626	M448	L192	1	0.985	0.57	90.634	45.813
57117	INTS12	S892	M152	L1	0.72	0.809	0.904	51.795	-19.722
65123	INTS3	S19	M1	L5	0.739	0.97	1	-91.839	22.929
92105	INTS4	S36	M35	L3	0.994	0.97	0.595	-43.076	37.648
26512	INTS6	S19	M1	L5	0.62	0.978	1	-87.471	28.257
25896	INTS7	S169	M153	L2	1	0.91	0.988	89.63	33.605
55656	INTS8	S2	M5	L7	0.54	1	1	-49.58	72.37
55756	INTS9	S626	M448	L192	1	0.985	0.57	90.458	46.202
27130	INVS	S248	M140	L24	0.975	0.98	0.811	30.066	-75.55
9807	IP6K1	S326	M265	L59	0.975	0.75	0.725	1.25	-60.301
51447	IP6K2	S150	M100	L10	0.95	0.932	0.695	-76.956	-15.786
51194	IPO11	S318	M263	L114	1	1	0.815	64.134	34.396
9670	IPO13	S754	M510	L7	0.84	0.745	0.847	-52.384	84.415
79711	IPO4	S140	M115	L77	1	0.995	0.905	9.152	-84.126
3843	IPO5	S348	M299	L10	0.98	0.545	0.883	-72.259	-10.138
10527	IPO7	S7	M4	L3	0.995	0.995	1	-24.912	-31.169
55705	IPO9	S10	M11	L11	0.924	0.985	0.95	-36.372	52.604
64768	IPPK	S272	M224	L151	1	0.955	0.885	-55.193	93.436
55721	IQCC	S999	M93	L2	0.579	0.65	0.766	84.243	43.411
389124	IQCF5	S1	M6	L2	0.974	0.965	1	85.022	-8.263
8826	IQGAP1	S841	M47	L17	0.605	0.635	0.435	-43.401	-8.365
440073	IQSEC3	S64	M30	L3	0.98	0.503	1	-40.756	-32.132
3658	IREB2	S74	M49	L28	1	1	0.66	-4.201	80.875
3659	IRF1	S262	M216	L6	0.93	0.87	0.985	19.759	-7.577
3660	IRF2	S30	M37	L4	0.94	0.955	0.543	-20.489	13.475
359948	IRF2BP2	S268	M221	L1	0.985	0.525	0.995	72.758	-59.805
3662	IRF4	S722	M28	L21	0.995	0.894	0.944	24.363	44.673
3394	IRF8	S105	M65	L1	0.976	0.964	0.875	36.828	-26.564
3667	IRS1	S24	M24	L16	0.975	0.98	0.985	1.796	86.604
8660	IRS2	S305	M236	L23	1	1	0.706	-56.969	46.64
79191	IRX3	S59	M43	L4	0.98	0.855	0.545	-9.608	8.898
10265	IRX5	S532	M178	L109	0.68	0.477	0.395	-60.443	-71.251
81689	ISCA1	S21	M16	L8	0.769	0.663	0.714	70.711	48.308
122961	ISCA2	S1000	M15	L8	0	0.91	0.731	58.736	60.035
23479	ISCU	S1001	M34	L1	0.281	0.312	0.95	42.055	-24.765
3669	ISG20	S135	M122	L75	1	0.995	0.94	18.684	-61.914
3670	ISL1	S28	M17	L4	1	0.955	0.545	-6.46	16.36
145501	ISM2	S619	M2	L2	0.965	0.913	0.99	94.391	12.705
9798	IST1	S464	M169	L2	0.99	0.815	0.995	98.936	-1.701
91464	ISX	S3	M3	L1	0.924	1	1	52.276	-67.465
57461	ISY1	S836	M12	L1	0.55	0.593	0.979	49.997	-30.12
51477	ISYNA1	S955	M74	L47	0.97	0.545	0.832	-12.279	-25.097
83737	ITCH	S490	M32	L26	0.518	0.435	0.395	-30.64	-89.839
55846	ITFG2	S838	M599	L6	0.965	0.495	0.944	10.707	-27.488
3674	ITGA2B	S199	M176	L6	0.99	0.73	0.98	1.861	-28.175
3675	ITGA3	S66	M85	L17	1	0.99	0.604	-51.847	-3.507
3676	ITGA4	S778	M519	L10	1	0.797	0.409	-69.669	-58.367
8516	ITGA8	S196	M110	L12	0.98	0.995	0.32	-33.38	-50.923
3681	ITGAD	S7	M4	L3	0.976	0.995	1	-27.422	-29.545
3684	ITGAM	S408	M330	L3	0.985	0.855	0.43	-37.545	0.82
3685	ITGAV	S37	M10	L10	0.755	0.985	0.945	-81.034	1.179
3687	ITGAX	S59	M43	L4	0.925	0.859	0.545	-7.108	5.046
3688	ITGB1	S66	M85	L17	0.99	0.98	0.594	-50.415	-3.343
9270	ITGB1BP1	S755	M6	L2	0.47	0.948	0.995	96.558	-5.023
3690	ITGB3	S37	M10	L10	0.755	0.985	0.945	-81.276	0.181
3691	ITGB4	S60	M77	L32	0.99	0.965	0.865	-44.155	-43.753
3693	ITGB5	S37	M10	L10	0.755	0.985	0.945	-81.335	1.459
3694	ITGB6	S911	M151	L3	0.775	0.787	0.566	-14.111	18.361
55600	ITLN1	S7	M4	L3	0.965	0.995	1	-25.524	-34.9
3704	ITPA	S210	M29	L3	0.556	0.729	0.472	-27.958	-62.155
3705	ITPK1	S197	M9	L6	0.46	0.79	0.99	11.652	-31.296
284359	IZUMO1	S16	M2	L2	0.759	0.911	1	92.988	8.699
79960	JADE1	S463	M8	L6	0.885	0.47	0.99	7.959	-27.727
182	JAG1	S44	M23	L14	0.979	0.96	0.832	-23.394	40.934
3714	JAG2	S3	M3	L1	0.982	0.963	0.79	50.663	-82.029
3716	JAK1	S359	M359	L161	0.5	0.855	0.67	-40.338	25.259
3717	JAK2	S242	M243	L5	0.826	0.561	0.435	-76.879	34.695
221895	JAZF1	S736	M491	L6	0.95	0.765	0.904	1.008	-22.75
23210	JMJD6	S288	M147	L3	0.93	0.585	0.98	-34.844	-30.904
[truncated: 3,031 more rows]

## Sheet: S60_C40
EntrezID	GeneSymbol	Cluster_Small	Cluster_Medium	Cluster_Large	Prob_Small	Prob_Medium	Prob_Large	tSNE_x	tSNE_y
8086	AAAS	S272	M241	L4	0.985	0.98	0.982	3.705	113.734
14	AAMP	S11	M10	L1	1	1	0.92	29.735	-17.12
16	AARS	S52	M2	L4	0.86	0.995	1	9.79	87.397
57505	AARS2	S29	M7	L6	0.895	0.99	0.93	-83.228	47.284
60496	AASDHPPT	S722	M513	L4	0.84	0.45	0.564	3.402	81.896
26574	AATF	S98	M102	L1	0.98	0.62	0.83	39.994	-5.784
9625	AATK	S138	M46	L1	0.905	0.805	0.4	-16.532	-10.996
19	ABCA1	S9	M11	L7	0.98	1	0.725	-32.701	13.508
23456	ABCB10	S10	M15	L7	1	0.705	0.725	-42.027	22.995
340273	ABCB5	S67	M35	L9	0.735	0.964	0.457	16.195	26.776
22	ABCB7	S173	M76	L29	0.965	0.985	0.92	-5.248	70.424
23457	ABCB9	S259	M231	L56	0.97	0.565	0.322	16.762	-7.109
8714	ABCC3	S636	M315	L198	1	1	0.93	77.652	-38.313
215	ABCD1	S638	M492	L8	1	0.855	0.448	75.866	-2.883
6059	ABCE1	S976	M16	L1	0.79	0.385	0.92	18.21	-25.539
23	ABCF1	S274	M244	L152	1	1	0.525	63.754	15.738
9619	ABCG1	S812	M509	L9	0.945	0.832	0.341	-7.028	23.864
55347	ABHD10	S231	M50	L3	0.737	0.795	0.735	5.447	-77.88
83451	ABHD11	S872	M639	L4	0.995	0.75	0.995	27.481	92.45
26090	ABHD12	S773	M22	L3	0.615	0.673	0.98	-16.279	-69.075
84945	ABHD13	S189	M6	L8	0.37	0.995	0.91	86.686	-8.893
81926	ABHD17A	S81	M49	L9	0.99	0.89	0.455	-2.727	30.36
10006	ABI1	S338	M260	L47	1	0.97	0.55	84.261	-24.075
29777	ABT1	S922	M49	L9	0.95	0.829	0.42	-4.426	27.71
31	ACACA	S390	M328	L196	1	1	0.995	-37.884	105.386
32	ACACB	S654	M453	L135	1	1	0.355	-65.263	-71.097
28976	ACAD9	S13	M9	L12	1	0.915	0.885	-95.482	34.257
35	ACADS	S851	M106	L1	0.975	0.409	0.652	2.57	-17.961
36	ACADSB	S63	M85	L64	0.77	0.83	0.51	1.554	-27.625
9744	ACAP1	S977	M12	L1	0	0.95	0.47	17.033	9.452
65057	ACD	S1	M4	L5	0.825	0.95	0.985	53.994	75.952
43	ACHE	S834	M618	L265	0.815	0.8	0.705	-24.823	-48.52
22985	ACIN1	S168	M28	L13	0.811	0.554	0.95	44.521	-42.563
51554	ACKR4	S731	M236	L140	0.94	0.785	0.605	54.621	-36.818
47	ACLY	S390	M328	L196	1	1	0.995	-37.916	104.482
50	ACO2	S906	M367	L171	1	0.995	0.563	-45.152	87.52
26027	ACOT11	S108	M140	L68	0.955	0.875	0.765	47.427	38.699
134526	ACOT12	S659	M405	L17	1	0.935	0.621	-24.353	57.478
10005	ACOT8	S978	M1	L3	0.28	0.778	0.975	-20.38	-81.079
51	ACOX1	S43	M59	L50	1	1	0.99	103.224	45.573
390928	ACP7	S774	M623	L313	0.915	0.85	0.486	36.386	-65.717
55	ACPP	S629	M463	L88	0.85	0.825	0.651	-32.404	-104.989
49	ACR	S348	M271	L165	1	0.95	0.815	-27.559	-43.739
2181	ACSL3	S429	M6	L8	0.955	0.54	0.86	76.107	-11.688
2182	ACSL4	S398	M54	L11	0.99	0.925	0.975	-33.488	78
84532	ACSS1	S773	M22	L3	0.615	0.673	0.98	-16.209	-69.689
60	ACTB	S293	M149	L9	1	0.56	0.405	13.343	15.578
345651	ACTBL2	S115	M3	L2	0.595	0.995	0.99	-75.876	-24.138
71	ACTG1	S293	M149	L9	1	0.56	0.405	13.477	15.23
72	ACTG2	S293	M149	L9	1	0.56	0.405	13.154	15.573
86	ACTL6A	S37	M36	L34	1	1	0.545	-6.524	-8.713
10881	ACTL7A	S135	M13	L3	0.705	0.673	0.98	-18.424	-59.653
87	ACTN1	S523	M411	L205	0.6	0.583	0.56	-55.922	-83.085
55860	ACTR10	S431	M336	L203	0.995	0.975	0.965	-53.872	-47.349
10121	ACTR1A	S499	M184	L38	0.975	0.942	0.79	57.157	-74.554
10120	ACTR1B	S559	M2	L4	0.58	0.791	1	5.867	102.394
10097	ACTR2	S143	M152	L47	1	1	0.55	82.44	-27.973
10096	ACTR3	S143	M152	L47	1	1	0.55	81.461	-28.103
79913	ACTR5	S82	M90	L63	0.971	0.827	0.711	112.149	26.676
64431	ACTR6	S37	M36	L34	1	1	0.545	-7.199	-7.638
93973	ACTR8	S82	M90	L63	1	1	0.93	110.869	29.952
4185	ADAM11	S55	M2	L4	0.53	0.89	1	3.836	85.772
27299	ADAMDEC1	S271	M1	L3	0.715	0.773	0.935	-20.802	-85.21
81794	ADAMTS10	S191	M189	L5	1	0.92	0.903	66.133	56.392
80070	ADAMTS20	S908	M598	L300	1	0.975	0.432	-59.319	-3.14
11033	ADAP1	S11	M10	L1	0.995	1	0.92	28.486	-14.921
103	ADAR	S181	M101	L77	1	1	0.905	32.363	41.098
134637	ADAT2	S226	M221	L4	0.985	0.795	0.938	12.8	80.003
113179	ADAT3	S327	M243	L105	1	0.995	0.77	31.69	98.424
109	ADCY3	S195	M197	L26	1	1	0.425	35.971	22.336
117	ADCYAP1R1	S5	M1	L3	0.486	1	0.98	-24.826	-90.355
25960	ADGRA2	S403	M1	L3	0.98	0.449	0.98	-25.245	-102.63
576	ADGRB2	S66	M1	L3	0.99	0.47	0.98	-7.526	-81.797
283383	ADGRD1	S406	M338	L3	1	0.573	0.965	-40.856	-92.129
221393	ADGRF4	S319	M285	L3	0.98	0.6	0.98	-33.76	-88.774
139378	ADGRG4	S54	M1	L3	0.745	0.974	0.98	-17.048	-86.447
125	ADH1B	S267	M238	L142	0.815	0.795	0.48	-15.719	48.153
127	ADH4	S379	M316	L9	1	0.99	0.382	5.645	27.622
128	ADH5	S149	M160	L81	1	0.995	0.68	-8.703	28.419
23394	ADNP	S445	M203	L45	0.81	0.802	0.634	-50.343	-33.343
135	ADORA2A	S452	M349	L200	1	1	0.905	95.061	7.185
83440	ADPGK	S41	M27	L16	0.965	1	0.605	62.148	-12.138
11047	ADRM1	S35	M37	L19	1	1	0.975	45.85	-67.094
158	ADSL	S17	M19	L11	1	0.525	1	-39.107	86.404
159	ADSS	S17	M19	L11	1	0.525	1	-39.235	84.902
84830	ADTRP	S16	M12	L1	1	1	0.47	-11.498	11.473
121536	AEBP2	S120	M11	L7	0.533	0.695	0.72	-23.567	12.648
166	TLE5	S10	M15	L7	1	0.705	0.725	-42.968	21.878
4301	AFDN	S12	M6	L8	0.773	0.995	0.91	92.271	-3.781
27125	AFF4	S369	M306	L33	0.895	0.895	0.344	-34.28	-38.617
10939	AFG3L2	S42	M23	L6	0.99	0.925	0.808	-71.237	39.244
116986	AGAP2	S720	M387	L3	1	0.85	0.608	5.11	-91.578
729092	AGAP5	S434	M370	L195	1	1	0.545	-42.863	-96.948
414189	AGAP6	S971	M3	L2	0.795	0.988	0.99	-63.854	-29.714
3268	AGFG2	S346	M226	L7	1	0.98	0.718	-41.448	30.435
178	AGL	S54	M1	L3	0.739	0.974	0.98	-17.183	-89.201
26523	AGO1	S979	M662	L96	0.61	0.39	0.365	-60.95	24.384
27161	AGO2	S801	M576	L318	1	1	0.779	62.579	-47.333
10554	AGPAT1	S393	M329	L4	0.995	0.52	0.985	11.723	104.037
56894	AGPAT3	S255	M162	L121	1	1	0.96	24.41	45.754
375790	AGRN	S55	M2	L4	0.53	0.89	1	6.447	83.15
25909	AHCTF1	S244	M66	L1	0.68	0.985	0.332	-18.634	58.598
191	AHCY	S17	M19	L11	0.985	0.525	1	-41.208	86.556
10768	AHCYL1	S507	M447	L11	1	0.67	0.812	-44.851	93.569
79026	AHNAK	S371	M309	L2	0.985	0.6	0.8	-74.796	-38.807
196	AHR	S533	M425	L236	1	1	1	-64.984	30.466
57491	AHRR	S827	M6	L8	0.563	0.983	0.869	67.045	-19.747
10598	AHSA1	S717	M628	L6	0.68	0.38	0.784	-62.795	40.962
9131	AIFM1	S739	M546	L29	0.99	0.86	0.565	0.308	66.717
51390	AIG1	S24	M33	L32	1	1	0.99	67	-31.609
9447	AIM2	S716	M1	L3	0.57	0.992	0.935	-21.858	-100.084
7965	AIMP2	S474	M1	L3	0.855	0.753	0.98	-22.434	-82.652
9049	AIP	S533	M425	L236	1	1	1	-64.261	30.392
84962	AJUBA	S199	M205	L3	0.44	0.755	0.783	-3.769	-59.705
205	AK4	S68	M68	L43	0.74	1	0.97	-54.877	12.744
79647	AKIRIN1	S854	M630	L5	0.94	0.755	0.962	65.796	67.701
10327	AKR1A1	S522	M410	L225	1	1	0.895	-7.629	-38.249
22977	AKR7A3	S462	M206	L35	1	0.585	0.34	-76.285	23.353
207	AKT1	S329	M98	L30	1	0.685	0.89	73.054	-42.944
208	AKT2	S329	M98	L30	1	0.685	0.89	74.518	-43.516
5832	ALDH18A1	S113	M134	L103	1	1	0.995	-32.842	71.202
217	ALDH2	S375	M265	L162	1	1	0.965	-43.768	-0.709
222	ALDH3B2	S552	M439	L135	1	0.994	0.565	7.555	38.794
226	ALDOA	S72	M89	L71	1	1	0.94	94.89	65.547
230	ALDOC	S879	M12	L1	0.98	0.601	0.465	-4.223	7.717
56052	ALG1	S351	M256	L4	0.96	0.64	1	7.095	80.165
144245	ALG10B	S375	M265	L162	1	1	0.965	-43.645	-0.144
440138	ALG11	S1	M4	L5	1	1	0.985	49.692	75.078
79087	ALG12	S60	M83	L66	0.945	1	0.87	20.72	51.846
79868	ALG13	S55	M2	L4	0.53	0.89	1	5.192	83.07
200810	ALG1L	S3	M2	L4	0.925	1	1	1.62	95.654
85365	ALG2	S215	M2	L4	0.775	0.899	1	9.839	94.409
29880	ALG5	S568	M27	L16	0.995	1	0.605	66.461	-14.731
29929	ALG6	S511	M403	L243	1	1	0.8	61.92	28.115
79053	ALG8	S511	M403	L243	1	1	0.8	61.757	28.14
79796	ALG9	S60	M83	L66	0.944	1	0.875	21.894	52.73
59344	ALOXE3	S766	M12	L1	0.98	0.974	0.47	-13.746	8.411
257	ALX3	S382	M320	L185	0.995	0.975	0.94	14.499	-75.732
10189	ALYREF	S187	M188	L1	1	0.995	0.266	-18.945	-27.219
55626	AMBRA1	S334	M259	L1	1	0.905	0.375	-14.38	40.898
262	AMD1	S17	M19	L11	1	0.525	1	-39.892	88.558
139285	AMER1	S78	M10	L1	0.995	0.345	0.92	24.952	-26.746
267	AMFR	S136	M84	L61	1	1	0.905	90.617	52.715
9949	AMMECR1	S894	M5	L2	0.709	0.795	0.99	-64.725	-53.026
154796	AMOT	S19	M17	L6	0.975	0.985	0.35	-87.911	-1.596
270	AMPD1	S362	M300	L7	1	0.9	0.72	-51.006	16.963
279	AMY2A	S502	M393	L143	0.84	0.855	0.67	54.069	13.507
64682	ANAPC1	S18	M16	L1	0.995	0.8	0.92	16.605	-20.988
10393	ANAPC10	S714	M523	L276	0.95	0.915	0.53	10.135	110.465
51529	ANAPC11	S820	M183	L115	0.95	0.963	0.798	-58.438	-17.488
25906	ANAPC15	S129	M107	L40	1	0.98	0.815	2.348	-45.76
29882	ANAPC2	S3	M2	L4	0.766	1	1	-7.739	98.988
29945	ANAPC4	S129	M107	L40	1	1	0.824	2.135	-43.549
51433	ANAPC5	S129	M107	L40	1	1	0.824	2.458	-43.496
283	ANG	S260	M1	L3	0.5	0.94	0.98	-13.897	-98.088
90806	ANGEL2	S127	M40	L1	0.867	0.723	0.467	30.071	2.809
162282	ANKFN1	S201	M1	L3	0.63	1	0.98	-18.097	-99.465
56172	ANKH	S187	M188	L1	0.959	0.975	0.271	-16.713	-28.758
23141	ANKLE2	S47	M58	L18	1	1	0.985	43.519	-88.699
29123	ANKRD11	S90	M86	L62	1	0.98	0.775	82.499	-48.533
26057	ANKRD17	S700	M146	L1	0.709	0.794	0.688	46.647	-5.117
118932	ANKRD22	S2	M5	L2	0.724	0.8	0.99	-72.065	-57.516
170961	ANKRD24	S429	M6	L8	0.995	0.575	0.9	76.651	-13.011
256006	ANKRD31	S4	M8	L10	1	1	0.97	92.156	19.413
57730	ANKRD36B	S47	M58	L18	0.985	0.985	0.98	45.782	-88.115
54851	ANKRD49	S153	M161	L120	0.98	0.995	0.616	51.012	-7.994
100287718	ANKRD66	S2	M5	L2	0.561	0.79	0.99	-69.24	-58.392
203286	ANKS6	S572	M457	L75	0.99	0.945	0.707	-53.9	-16.32
54443	ANLN	S174	M172	L82	1	0.995	0.67	44.173	16.087
8125	ANP32A	S442	M321	L67	1	0.995	0.942	72.198	-71.494
81611	ANP32E	S611	M2	L4	0.6	0.848	0.954	-7.607	81.067
84168	ANTXR1	S905	M87	L1	0.985	0.788	0.809	50.865	5.664
310	ANXA7	S362	M300	L7	1	0.9	0.72	-51.764	17.837
8416	ANXA9	S9	M11	L7	0.945	1	0.725	-38.675	15.296
162	AP1B1	S845	M560	L266	1	0.995	0.72	-40.284	-54.99
164	AP1G1	S845	M560	L266	1	0.995	0.72	-40.285	-54.988
8906	AP1G2	S110	M129	L57	1	0.98	0.425	-26.324	36.263
10053	AP1M2	S361	M299	L2	0.965	0.715	0.991	-94.712	-52.915
1174	AP1S1	S427	M361	L191	1	1	0.735	90.289	2.362
1173	AP2M1	S44	M48	L28	1	0.99	0.995	-25.077	72.311
1175	AP2S1	S44	M48	L28	1	0.99	0.995	-24.607	72.467
8546	AP3B1	S304	M253	L158	0.995	0.995	0.955	22.061	113.414
324	APC	S334	M259	L1	1	0.905	0.375	-13.119	41.51
10297	APC2	S279	M16	L1	0.965	0.621	0.92	16.482	-15.39
27301	APEX2	S49	M28	L13	0.99	0.85	0.93	50.523	-42.202
8539	API5	S227	M222	L91	1	0.995	0.4	17.288	45.341
333	APLP1	S88	M113	L20	0.99	0.505	0.87	66.004	3.096
200316	APOBEC3F	S5	M1	L3	0.919	1	0.98	-21.144	-96.34
347	APOD	S35	M37	L19	1	1	0.975	46.249	-63.729
348	APOE	S2	M5	L2	0.903	0.835	0.99	-73.679	-56.125
8542	APOL1	S286	M224	L2	0.795	0.61	0.954	-87.119	-47.688
23780	APOL2	S176	M1	L3	0.95	0.748	0.98	-20.36	-78.948
353	APRT	S147	M154	L7	0.975	0.595	0.724	-44.156	28.396
364	AQP7	S340	M2	L4	0.52	0.679	0.99	10.476	106.277
9716	AQR	S332	M13	L3	0.8	0.696	0.98	-25.407	-74.822
372	ARCN1	S5	M1	L3	0.52	1	0.98	-10.827	-92.769
9870	AREL1	S793	M27	L16	0.925	0.721	0.6	63.14	-18.366
375	ARF1	S338	M260	L47	1	0.97	0.55	82.906	-23.548
377	ARF3	S425	M12	L1	0.435	0.662	0.465	-6.423	5.277
378	ARF4	S204	M209	L132	1	1	1	89.021	39.377
382	ARF6	S356	M13	L3	0.72	0.298	0.846	-13.343	-59.342
55738	ARFGAP1	S409	M39	L1	0.9	0.946	0.487	11.624	6.107
27236	ARFIP1	S57	M1	L3	0.96	0.67	0.955	-28.492	-86.57
10139	ARFRP1	S245	M202	L128	1	1	0.725	104.373	-58.068
503582	ARGFX	S591	M4	L5	0.99	0.76	0.985	60.658	66.555
55082	ARGLU1	S395	M193	L4	0.965	0.765	0.975	-11.738	92.712
9824	ARHGAP11A	S12	M6	L8	0.825	0.995	0.91	90.131	-10.089
89839	ARHGAP11B	S84	M30	L2	0.616	0.495	0.981	-101.688	-26.919
84986	ARHGAP19	S962	M543	L272	1	1	0.99	28.201	36.021
201176	ARHGAP27	S284	M82	L17	0.565	0.87	0.633	-36.718	51.81
9411	ARHGAP29	S734	M27	L16	0.855	0.899	0.605	59.086	-12.549
158763	ARHGAP36	S237	M14	L1	0.95	0.379	0.92	10.332	-17.08
393	ARHGAP4	S119	M108	L52	1	1	0.54	-49.813	81.989
23526	ARHGAP45	S516	M150	L1	0.92	0.96	0.341	-8.984	-0.165
394	ARHGAP5	S980	M149	L9	0	0.418	0.365	7.642	15.455
64333	ARHGAP9	S647	M433	L211	1	1	0.795	-55.896	85.698
398	ARHGDIG	S171	M13	L3	0.52	0.513	0.975	-27.386	-74.003
9181	ARHGEF2	S126	M65	L53	0.992	0.96	0.655	-32.986	-47.377
100271715	ARHGEF33	S453	M178	L1	0.69	0.4	0.915	10.566	-26.717
7984	ARHGEF5	S823	M511	L8	1	0.877	0.844	96.562	-13.398
8874	ARHGEF7	S174	M172	L82	1	0.995	0.67	45.157	16.546
8289	ARID1A	S97	M104	L7	1	0.905	0.485	-42.695	37.588
57492	ARID1B	S97	M104	L7	1	0.905	0.485	-43.651	37.815
196528	ARID2	S438	M373	L192	1	0.875	0.595	-31.828	-7.738
1820	ARID3A	S92	M97	L5	1	0.995	0.98	36.27	68.712
10620	ARID3B	S229	M119	L1	0.698	0.738	0.635	8.13	-13.114
5926	ARID4A	S582	M462	L1	1	0.85	0.641	3.028	-12.834
51742	ARID4B	S557	M442	L252	1	0.985	0.83	-15.039	63.525
84159	ARID5B	S18	M16	L1	0.864	0.789	0.92	19.737	-22.868
25820	ARIH1	S86	M112	L1	1	0.995	0.33	5.313	9.462
115761	ARL11	S104	M10	L1	0.575	1	0.92	24.501	-15.347
402	ARL2	S326	M269	L92	0.995	0.995	0.935	12.798	-48.068
10123	ARL4C	S313	M247	L145	1	0.975	0.79	-54.428	37.008
379	ARL4D	S794	M18	L15	0.805	0.466	0.335	-4.166	52.642
221079	ARL5B	S50	M77	L16	1	0.97	0.547	62.727	-5.184
390790	ARL5C	S140	M106	L1	1	0.6	0.695	5.19	-15.954
51329	ARL6IP4	S39	M3	L2	0.655	0.978	0.99	-79.732	-23.513
55207	ARL8B	S198	M204	L46	1	1	0.995	18.436	63.554
79798	ARMC5	S441	M6	L8	0.925	0.927	0.91	85.976	-5.989
93436	ARMC6	S20	M20	L14	0.99	1	0.675	63.483	40.815
79637	ARMC7	S542	M20	L14	0.98	0.995	0.675	67.78	37.375
339541	ARMH1	S953	M592	L1	1	0.905	0.485	-15.084	-3.259
79591	ARMH3	S981	M3	L2	0	0.939	0.99	-71.551	-32.307
145407	ARMH4	S712	M528	L263	0.77	0.8	0.41	-102.059	-46.706
405	ARNT	S533	M425	L236	1	1	1	-65.145	30.486
406	ARNTL	S827	M6	L8	0.563	0.983	0.869	67.103	-19.626
10552	ARPC1A	S169	M39	L1	0.723	0.939	0.487	14.144	9.016
10109	ARPC2	S143	M152	L47	1	1	0.55	81.321	-28.228
10094	ARPC3	S143	M152	L47	1	1	0.55	82.728	-28.23
10093	ARPC4	S143	M152	L47	1	1	0.55	82.595	-27.703
10776	ARPP19	S469	M372	L1	1	0.959	0.45	-6.724	18.211
410	ARSA	S275	M245	L1	1	0.995	0.355	-27.897	-21.27
153642	ARSK	S2	M5	L2	0.583	0.84	0.99	-76.201	-56.983
421	ARVCF	S21	M25	L1	1	0.6	0.465	-2.692	1.735
136371	ASB10	S521	M409	L6	0.825	0.78	0.719	-66.3	38.264
92591	ASB16	S927	M14	L1	0.59	0.367	0.92	8.248	-22.459
10973	ASCC3	S676	M236	L140	1	0.955	0.705	56.941	-34.554
429	ASCL1	S247	M190	L1	0.595	0.885	0.289	1.922	39.489
25842	ASF1A	S411	M344	L194	0.845	0.845	0.755	-40.711	-14.477
55723	ASF1B	S296	M251	L157	0.425	0.573	0.36	49.251	-33.789
433	ASGR2	S635	M377	L223	0.75	0.8	0.64	-34.987	-15.717
55870	ASH1L	S657	M125	L97	0.945	0.935	0.795	-32.524	41.753
9070	ASH2L	S581	M408	L242	1	1	0.98	33.868	33.634
41	ASIC1	S982	M663	L2	0.865	0.805	0.49	-86.26	-54.754
40	ASIC2	S496	M386	L3	1	0.785	0.944	-13.529	-71.806
435	ASL	S139	M40	L1	1	0.935	0.452	24.518	-0.629
439	ASNA1	S769	M552	L301	1	1	0.935	13.003	71.172
440	ASNS	S113	M134	L103	1	1	0.995	-34.296	70.289
253982	ASPHD1	S2	M5	L2	0.985	0.84	0.99	-71.945	-51.157
259266	ASPM	S206	M141	L2	0.995	0.955	0.643	-64.191	-40.988
151516	ASPRV1	S908	M598	L300	1	0.975	0.432	-59.317	-3.148
445	ASS1	S476	M323	L187	1	1	0.82	-23.062	25.252
23245	ASTN2	S18	M16	L1	0.897	0.7	0.92	15.139	-25.733
171023	ASXL1	S22	M14	L1	1	0.465	0.92	17.375	-29.568
55210	ATAD3A	S521	M409	L6	1	0.825	0.786	-68.246	38.36
83858	ATAD3B	S633	M423	L231	1	0.97	0.73	-60.872	41.39
79915	ATAD5	S110	M129	L57	1	0.98	0.425	-27.042	37.759
466	ATF1	S473	M38	L17	0.97	1	0.76	-26.117	54.953
467	ATF3	S305	M263	L139	1	1	0.725	-51.196	-55.686
468	ATF4	S113	M134	L103	1	1	0.995	-34.681	70.06
55729	ATF7IP	S241	M82	L17	1	0.863	0.674	-38.074	53.373
60673	ATG101	S567	M455	L255	1	1	1	-80.514	10.783
9776	ATG13	S4	M8	L10	1	1	0.97	93.179	14.593
84971	ATG4D	S230	M12	L1	0.642	0.924	0.47	-17.978	11.682
79065	ATG9A	S567	M455	L255	1	1	1	-80.511	10.803
471	ATIC	S17	M19	L11	1	0.525	1	-37.598	86.012
64225	ATL2	S983	M84	L61	0.531	0.805	0.8	90.869	48.821
23300	ATMIN	S815	M595	L322	1	1	0.965	58.351	90.838
84913	ATOH8	S462	M206	L35	1	0.585	0.34	-76.603	23.463
475	ATOX1	S181	M101	L77	1	1	0.905	33.226	39.786
57130	ATP13A1	S149	M160	L81	1	0.995	0.68	-8.514	28.022
476	ATP1A1	S17	M19	L11	1	0.538	1	-27.03	88.852
483	ATP1B3	S298	M254	L106	0.995	0.985	0.95	-26.238	86.793
91419	ATP23	S984	M346	L2	0.762	0.366	0.817	-63.2	-63.128
488	ATP2A2	S204	M209	L132	1	1	1	89.442	36.929
490	ATP2B1	S985	M35	L9	0.375	0.71	0.421	19.747	-2.979
493	ATP2B4	S234	M199	L6	0.995	0.895	0.631	-67.456	47.049
27032	ATP2C1	S116	M93	L27	1	1	0.76	23.91	57.35
495	ATP4A	S303	M284	L2	0.985	0.995	0.868	-60.223	-46.192
498	ATP5F1A	S96	M23	L6	0.96	0.854	0.803	-74.897	32.307
506	ATP5F1B	S96	M23	L6	0.96	0.854	0.803	-75.949	32.154
509	ATP5F1C	S190	M80	L35	0.705	0.799	0.345	-83.897	24.831
513	ATP5F1D	S400	M335	L24	1	0.995	0.48	-76.575	63.602
514	ATP5F1E	S400	M335	L24	1	0.995	0.48	-76.631	64.078
516	ATP5MC1	S3	M2	L4	0.775	1	1	-2.596	98.013
517	ATP5MC2	S497	M26	L22	0.805	0.923	0.236	-30.193	1.2
84833	ATP5MD	S574	M498	L2	0.96	0.57	0.99	-61.949	-59.404
521	ATP5ME	S96	M23	L6	0.96	0.854	0.803	-75.939	31.686
9551	ATP5MF	S96	M23	L6	0.96	0.854	0.803	-76.395	32.637
10632	ATP5MG	S96	M23	L6	0.96	0.854	0.803	-77.329	32.814
9556	ATP5MPL	S6	M3	L2	0.785	0.985	0.97	-75.956	-26.631
515	ATP5PB	S96	M23	L6	0.96	0.854	0.803	-74.881	31.178
10476	ATP5PD	S190	M80	L35	0.955	0.87	0.345	-84.209	23.116
522	ATP5PF	S96	M23	L6	0.96	0.854	0.803	-76.627	30.448
539	ATP5PO	S96	M23	L6	0.96	0.854	0.803	-74.881	32.184
537	ATP6AP1	S380	M296	L60	1	0.995	0.382	-3.83	60.609
10159	ATP6AP2	S380	M296	L60	1	0.995	0.382	-4.182	60.603
535	ATP6V0A1	S876	M2	L4	0.77	0.99	1	10.286	90.361
23545	ATP6V0A2	S305	M263	L139	0.806	0.67	0.508	-54.209	-54.072
50617	ATP6V0A4	S217	M217	L124	1	1	0.995	26.187	74.295
533	ATP6V0B	S228	M2	L4	0.565	0.985	1	-6.07	92.258
527	ATP6V0C	S868	M142	L101	0.725	0.535	0.8	40.204	110.124
9114	ATP6V0D1	S123	M22	L3	0.765	0.661	0.98	-18.302	-75.317
8992	ATP6V0E1	S346	M226	L7	1	0.98	0.718	-40.119	30.297
523	ATP6V1A	S154	M164	L65	1	1	0.7	-17.352	73.524
526	ATP6V1B2	S154	M164	L65	1	1	0.7	-17.489	73.62
528	ATP6V1C1	S648	M436	L220	0.98	0.985	0.935	73.807	-31.82
51382	ATP6V1D	S154	M164	L65	1	1	0.7	-17.969	74.506
9296	ATP6V1F	S3	M2	L4	0.925	1	1	3.195	95.158
51606	ATP6V1H	S228	M2	L4	0.575	0.975	0.99	-6.435	91.578
540	ATP7B	S419	M92	L30	0.615	0.91	0.535	69.626	-45.592
545	ATR	S26	M31	L21	0.995	1	0.945	29.427	-66.698
51374	ATRAID	S574	M498	L2	0.96	0.57	0.99	-63	-59.056
84126	ATRIP	S26	M31	L21	0.995	1	0.945	29.341	-67.043
546	ATRX	S950	M568	L306	0.975	0.925	0.615	71.748	-61.73
6314	ATXN7	S51	M52	L33	1	1	0.75	-41.488	-30.297
550	AUP1	S60	M83	L66	1	0.995	0.905	18.54	48.507
6790	AURKA	S184	M175	L122	1	0.955	0.715	17.935	-44.73
54998	AURKAIP1	S225	M7	L6	0.875	0.887	0.93	-80.549	37.035
9212	AURKB	S161	M174	L118	1	0.985	0.4	39.351	29.022
26053	AUTS2	S303	M284	L2	0.985	0.98	0.869	-60.031	-49.366
57099	AVEN	S213	M4	L5	0.868	0.954	0.985	58.695	71.897
553	AVPR1B	S262	M233	L88	1	1	0.91	-33.457	-108.759
158835	AWAT2	S231	M50	L3	0.845	0.799	0.906	1.964	-77.002
51582	AZIN1	S31	M13	L3	0.925	0.744	0.98	-19.856	-69.543
566	AZU1	S5	M1	L3	0.719	1	0.98	-15.071	-92.992
126792	B3GALT6	S36	M21	L23	1	1	0.875	28.785	24.459
26229	B3GAT3	S152	M21	L23	0.705	1	0.875	26.34	29.961
145173	B3GLCT	S21	M25	L1	0.726	0.6	0.465	-3.348	4.197
10678	B3GNT2	S840	M565	L92	1	0.946	0.854	10.641	-53.123
79369	B3GNT4	S273	M137	L104	1	1	0.755	-34.568	26.832
8703	B4GALT3	S317	M281	L151	0.995	0.91	0.72	8.23	-95.491
8702	B4GALT4	S326	M269	L92	1	1	0.94	10.844	-50.008
9334	B4GALT5	S343	M88	L5	0.86	0.881	0.585	52.501	46.866
11285	B4GALT7	S169	M39	L1	0.723	0.939	0.487	13.754	8.538
23621	BACE1	S178	M157	L14	1	0.885	0.53	60.969	34.663
25825	BACE2	S10	M15	L7	1	0.705	0.725	-45.278	21.354
9532	BAG2	S893	M126	L20	0.735	0.621	0.7	71.387	4.718
7917	BAG6	S334	M259	L1	1	0.905	0.375	-14.665	40.489
25805	BAMBI	S931	M421	L5	0.938	0.885	0.515	37.897	74.178
8815	BANF1	S6	M3	L2	0.843	1	0.99	-67.277	-26.372
8314	BAP1	S94	M45	L36	0.548	0.643	0.597	6.406	-75.467
580	BARD1	S26	M31	L21	0.915	0.945	0.955	23.634	-65.155
343472	BARHL2	S831	M559	L1	0.995	0.965	0.192	-17.909	5.685
9031	BAZ1B	S962	M543	L272	1	1	0.99	28.199	36.014
27113	BBC3	S909	M643	L296	1	0.995	0.785	-45.731	-46.226
63827	BCAN	S328	M287	L148	0.985	0.96	0.675	13.377	-36.987
55973	BCAP29	S62	M53	L3	0.995	0.89	0.975	-40.219	-85.701
9564	BCAR1	S7	M6	L8	1	1	0.91	84.554	-13.124
8412	BCAR3	S7	M6	L8	1	1	0.91	86.167	-13.235
10286	BCAS2	S721	M10	L1	0.765	0.713	0.764	1.576	-7.222
56647	BCCIP	S216	M146	L1	0.665	0.93	0.794	49.113	-4.464
144233	BCDIN3D	S290	M163	L2	0.788	0.803	0.394	-71.748	-5.756
596	BCL2	S963	M538	L317	1	1	0.59	-59.45	33.936
598	BCL2L1	S157	M144	L26	0.625	0.589	0.415	38.057	18.116
10017	BCL2L10	S10	M15	L7	1	0.705	0.725	-41.937	22.979
83596	BCL2L12	S9	M11	L7	0.99	0.995	0.72	-37.013	11.755
599	BCL2L2	S696	M365	L1	0.663	0.409	0.896	30.408	-24.906
604	BCL6	S12	M6	L8	0.421	0.692	0.829	89.022	-3.311
605	BCL7A	S63	M85	L64	1	0.99	0.56	-23.136	44.896
283149	BCL9L	S545	M435	L257	1	1	1	-20.309	118.273
9774	BCLAF1	S571	M452	L1	1	0.58	0.439	21.146	-4.196
53630	BCO1	S239	M207	L131	0.99	0.93	0.845	7.154	-71.11
54880	BCOR	S284	M82	L17	0.925	0.87	0.633	-35.654	50.48
617	BCS1L	S23	M9	L12	0.995	1	0.885	-88.612	28.231
622	BDH1	S127	M40	L1	0.954	0.686	0.457	31.488	1.096
624	BDKRB2	S385	M324	L189	1	1	0.58	-34.97	-0.556
55814	BDP1	S343	M88	L5	0.693	0.919	0.355	53.153	44.286
8678	BECN1	S276	M194	L7	1	0.65	0.72	-28.573	20.762
57596	BEGAIN	S607	M1	L3	0.81	0.995	0.98	-21.617	-89.218
10282	BET1	S30	M41	L18	1	0.84	0.64	50.302	-76.921
633	BGN	S237	M14	L1	0.95	0.379	0.92	10.698	-17.116
79365	BHLHE41	S91	M38	L17	0.995	0.955	0.795	-27.431	51.281
23743	BHMT2	S174	M172	L82	0.99	0.98	0.66	46.105	15.133
23299	BICD2	S986	M664	L324	0	0	0	-61.677	-77.028
274	BIN1	S22	M14	L1	1	0.465	0.92	20.737	-30.938
329	BIRC2	S270	M166	L96	1	1	0.57	-57.843	24.64
332	BIRC5	S161	M174	L118	1	0.985	0.4	39.104	28.356
57448	BIRC6	S366	M127	L98	0.645	1	0.99	-68.107	20.138
112401	BIRC8	S509	M488	L3	1	0.901	0.769	-19.227	-47.32
641	BLM	S387	M156	L113	1	1	0.89	38.321	41.105
282991	BLOC1S2	S27	M3	L2	0.995	0.835	0.99	-86.219	-41.2
63915	BLOC1S5	S27	M3	L2	0.933	0.844	0.99	-89.034	-38.615
654	BMP6	S358	M298	L175	0.955	0.795	0.513	1.448	-62.357
657	BMPR1A	S24	M33	L32	0.985	0.985	0.975	64.708	-35.36
9790	BMS1	S461	M318	L22	0.995	0.915	0.58	-1.432	-14.813
662	BNIP1	S588	M475	L215	1	1	0.915	-74.631	-0.479
388962	BOLA3	S13	M9	L12	0.995	0.915	0.885	-96.94	37.364
23246	BOP1	S103	M87	L1	1	0.75	0.824	49.15	1.554
79866	BORA	S1	M4	L5	0.84	1	0.985	45.47	71.886
118426	BORCS5	S198	M204	L46	1	1	0.995	17.189	62.238
119032	BORCS7	S987	M421	L5	0.494	0.515	0.877	38.608	73.979
128861	BPIFA3	S491	M496	L2	1	0.585	0.96	-60.766	-54.295
92747	BPIFB1	S2	M5	L2	0.738	0.83	0.99	-63.846	-55.432
10380	BPNT1	S686	M193	L4	0.707	0.631	1	-10.63	95.786
2186	BPTF	S370	M307	L1	1	0.935	0.285	-13.08	-14.465
673	BRAF	S217	M217	L124	1	1	0.995	27.103	73.779
8315	BRAP	S35	M37	L19	1	1	0.975	46.953	-66.026
672	BRCA1	S26	M31	L21	0.915	0.945	0.955	23.796	-65.093
675	BRCA2	S167	M182	L21	0.985	0.71	0.955	24.363	-68.495
23774	BRD1	S726	M583	L91	1	0.91	0.418	12.28	45.649
6046	BRD2	S95	M99	L83	0.71	0.71	0.64	24.705	-43.143
23476	BRD4	S28	M18	L15	0.725	1	0.425	-2.296	48.954
29117	BRD7	S438	M373	L192	1	0.875	0.595	-32.123	-8.13
10902	BRD8	S943	M611	L7	0.71	0.655	0.267	-11.429	-9.427
65980	BRD9	S957	M400	L1	0.995	0.625	0.24	-10.4	38.645
2972	BRF1	S3	M2	L4	0.767	1	1	-2.873	94.011
55290	BRF2	S52	M2	L4	0.84	0.995	1	10.862	86.662
83990	BRIP1	S59	M61	L48	1	0.995	0.85	73.441	26.008
55299	BRIX1	S292	M261	L167	1	1	0.96	31.497	-78.622
55845	BRK1	S338	M260	L47	1	0.97	0.55	83.78	-24.023
25855	BRMS1	S147	M154	L7	0.975	0.595	0.719	-44.745	30.314
84312	BRMS1L	S646	M8	L10	0.8	1	0.97	90.897	22.549
7862	BRPF1	S657	M125	L97	0.945	0.935	0.795	-32.563	42.433
9024	BRSK2	S167	M182	L21	0.974	0.719	0.908	22.58	-71.033
26580	BSCL2	S191	M189	L5	1	0.92	0.903	65.55	56.681
682	BSG	S80	M110	L78	1	1	0.955	97.934	-32.583
9044	BTAF1	S298	M254	L106	1	1	0.965	1.266	59.916
643376	BTBD18	S427	M361	L191	1	1	0.735	89.217	2.664
90135	BTBD6	S382	M320	L185	0.918	0.917	0.864	13.603	-75.307
55727	BTBD7	S11	M10	L1	0.86	0.995	0.92	28.453	-13.27
114781	BTBD9	S988	M226	L7	0	0.975	0.718	-40.223	28.234
686	BTD	S137	M120	L1	0.995	0.61	0.364	3.295	22.289
689	BTF3	S504	M420	L232	1	0.985	0.475	59.002	9.688
91408	BTF3L4	S10	M15	L7	1	0.705	0.725	-41.759	20.253
79908	BTNL8	S104	M10	L1	0.575	1	0.92	23.751	-16.4
8945	BTRC	S674	M444	L253	0.995	0.995	0.985	-42.989	46.058
699	BUB1	S842	M184	L38	0.72	0.925	0.825	60.072	-75.632
701	BUB1B	S50	M77	L16	0.865	0.872	0.471	61.313	-7.133
9184	BUB3	S50	M77	L16	0.865	0.872	0.471	61.193	-7.327
84811	BUD13	S288	M66	L1	0.995	0.634	0.291	-49.088	66.139
114049	BUD23	S30	M41	L18	1	0.84	0.64	52.156	-78.056
8896	BUD31	S30	M41	L18	1	0.84	0.64	50.535	-78.342
705	BYSL	S630	M4	L5	0.755	0.995	0.985	57.337	67.36
387638	C10orf113	S586	M3	L2	0.49	0.479	0.99	-84.863	-23.834
53838	C11orf24	S67	M35	L9	0.734	0.985	0.457	12.595	26.838
79096	C11orf49	S25	M24	L2	1	0.66	0.99	-96.401	-16.972
54494	C11orf71	S570	M505	L229	1	0.96	0.83	-19.013	105.036
121053	C12orf45	S25	M24	L2	1	0.66	0.99	-91.603	-19.251
79794	C12orf49	S136	M84	L61	1	1	0.905	90.151	52.282
146562	C16orf71	S25	M24	L2	0.98	0.66	0.99	-90.525	-16.577
388272	C16orf87	S819	M14	L1	0.995	0.345	0.92	22.222	-27.139
146556	C16orf89	S821	M608	L2	1	0.875	0.875	-80.94	-48.62
284018	C17orf58	S613	M499	L233	1	0.985	0.475	63.128	-41.196
28974	C19orf53	S852	M56	L42	0.91	1	0.924	43.649	50.885
10438	C1D	S162	M153	L1	0.92	0.73	0.379	47.351	-9.489
56913	C1GALT1	S176	M1	L3	0.895	0.748	0.98	-22.542	-77.908
29071	C1GALT1C1	S170	M78	L3	0.99	0.825	0.966	-33.869	-76.507
713	C1QB	S34	M26	L22	0.994	0.965	0.24	-22.957	4.715
708	C1QBP	S225	M7	L6	0.93	0.887	0.93	-80.282	39.404
114897	C1QTNF1	S41	M27	L16	0.995	1	0.605	60.486	-15.159
114904	C1QTNF6	S18	M16	L1	0.99	0.8	0.92	14.598	-22.674
387911	C1QTNF9B	S145	M180	L108	0.88	0.88	0.605	20.145	2.77
54955	C1orf109	S354	M4	L5	0.985	0.5	0.965	62.286	51.546
79098	C1orf116	S135	M13	L3	0.738	0.638	0.98	-18.805	-57.276
54987	CZIB	S27	M3	L2	0.9	0.815	0.98	-85.171	-38.291
128061	C1orf131	S2	M5	L2	0.985	0.84	0.99	-69.744	-56.008
79630	C1orf54	S2	M5	L2	0.558	0.8	0.96	-77.342	-57.739
148304	C1orf74	S3	M2	L4	0.953	1	1	2.163	97.539
56245	C21orf62	S160	M3	L2	0.7	0.546	0.99	-86.586	-20.655
205327	C2orf69	S130	M143	L5	1	0.91	0.947	43.867	57.036
129852	C2orf73	S10	M15	L7	1	0.705	0.725	-45.426	23.232
285237	C3orf38	S693	M6	L8	0.545	0.99	0.91	88.429	-18.223
79669	C3orf52	S27	M3	L2	0.995	0.835	0.99	-87.191	-42.15
100190949	C5orf52	S946	M5	L2	0.712	0.751	0.99	-64.192	-50.721
221545	C6orf136	S71	M94	L2	1	0.985	0.843	-87.049	-7.409
29113	C6orf15	S405	M294	L2	0.88	0.505	0.99	-92.263	-32.438
347744	C6orf52	S384	M5	L2	0.98	0.765	0.965	-67.8	-66.186
65265	C8orf33	S124	M147	L95	0.72	0.727	0.698	67.1	-56.058
84688	C9orf24	S486	M378	L219	1	0.99	0.55	1.435	-113.755
257169	C9orf43	S361	M299	L2	0.965	0.715	0.991	-94.233	-54.249
759	CA1	S18	M16	L1	0.995	0.8	0.92	16.412	-21.157
763	CA5A	S418	M353	L8	0.954	0.69	0.615	69.669	-5.565
766	CA7	S280	M246	L154	1	1	0.935	34.396	53.765
51719	CAB39	S91	M38	L17	1	0.955	0.795	-26.246	50.691
23523	CABIN1	S411	M344	L194	1	1	0.845	-41.445	-15.751
57010	CABP4	S645	M8	L10	0.9	0.993	0.965	86.629	12.875
56344	CABP5	S162	M153	L1	1	0.945	0.53	48.577	-10.336
164633	CABP7	S258	M13	L3	0.38	0.775	0.98	-22.116	-64.899
774	CACNA1B	S179	M173	L117	1	1	0.985	-45.209	-9.555
775	CACNA1C	S121	M64	L1	0.995	0.93	0.5	11.47	-1.686
8911	CACNA1I	S447	M326	L1	0.91	0.66	0.396	16.796	20.782
782	CACNB1	S9	M11	L7	0.99	1	0.725	-33.613	12.49
784	CACNB3	S80	M110	L78	1	0.985	0.925	98.53	-34.546
27101	CACYBP	S39	M3	L2	0.925	0.965	0.99	-82.002	-27.507
790	CAD	S254	M132	L11	1	0.815	1	-32.288	86.265
199731	CADM4	S713	M181	L114	0.88	0.469	0.508	62.16	83.109
801	CALM1	S850	M149	L9	0.935	0.549	0.38	10.304	15.152
805	CALM2	S850	M149	L9	0.935	0.549	0.38	10.519	15.18
83698	CALN1	S242	M191	L54	0.995	0.975	0.6	-35.939	-62.976
816	CAMK2B	S989	M185	L72	0	0.99	0.995	-71.036	84.89
818	CAMK2G	S233	M100	L84	1	0.585	0.915	32.348	-99.631
55450	CAMK2N1	S110	M129	L57	1	0.98	0.425	-27.876	36.49
84254	CAMKK1	S16	M12	L1	0.975	0.995	0.47	-9.031	8.116
10645	CAMKK2	S990	M665	L90	0	0	0.359	-21.912	-42.313
819	CAMLG	S9	M11	L7	0.995	1	0.725	-34.574	15.137
55832	CAND1	S101	M16	L1	0.755	0.555	0.875	4.62	-33.382
10487	CAP1	S410	M29	L9	0.869	0.973	0.366	13.206	34.352
822	CAPG	S5	M1	L3	0.983	1	0.98	-26.412	-93.822
826	CAPNS1	S777	M603	L1	0.985	0.885	0.442	13.995	-5.414
4076	CAPRIN1	S525	M412	L3	1	0.985	0.721	-48.058	-89.563
832	CAPZB	S410	M29	L9	0.92	0.972	0.364	11.522	33.312
29775	CARD10	S62	M53	L3	0.909	0.85	0.9	-42.063	-82.864
84433	CARD11	S16	M12	L1	0.99	1	0.47	-8.706	12.785
64170	CARD9	S126	M65	L53	0.992	0.96	0.655	-32.774	-48.052
10498	CARM1	S426	M122	L93	0.96	1	0.97	79.184	61.669
833	CARS	S760	M570	L3	0.985	0.85	0.754	-16.074	-44.823
79587	CARS2	S246	M225	L6	1	0.99	0.442	-93.347	12.23
9607	CARTPT	S928	M3	L2	0.425	0.772	0.99	-77.61	-44.292
22794	CASC3	S439	M2	L4	0.985	0.6	1	-9.655	102.753
846	CASR	S592	M384	L228	1	0.995	0.605	35.521	-2.122
729438	CASTOR2	S672	M419	L2	0.995	0.415	0.99	-73.003	-37.089
352954	CASTOR3	S217	M217	L124	0.995	0.995	0.99	28.658	75.121
54897	CASZ1	S1	M4	L5	0.985	1	0.985	52.457	76.838
257062	CATSPERD	S182	M30	L2	0.66	0.614	0.99	-70.088	-45.229
57828	CATSPERG	S777	M603	L1	0.985	0.885	0.442	14.069	-5.461
865	CBFB	S435	M371	L179	1	1	0.725	-21.621	20.089
79872	CBLL1	S91	M38	L17	0.59	0.95	0.795	-29.004	49.974
869	CBLN1	S447	M326	L1	0.91	0.66	0.396	17.406	19.737
84869	CBR4	S772	M626	L136	1	0.825	0.251	105.532	-0.758
55871	CBWD1	S22	M14	L1	1	0.451	0.92	23.126	-32.799
150472	CBWD2	S256	M133	L5	1	0.533	0.854	65.769	50.032
10951	CBX1	S241	M82	L17	1	0.863	0.674	-38.567	52.625
23468	CBX5	S522	M410	L225	1	1	0.895	-7.944	-38.872
54862	CC2D1A	S54	M1	L3	0.739	0.974	0.98	-17.307	-87.908
55749	CCAR1	S48	M44	L9	0.99	0.94	0.462	7.672	19.457
93233	CCDC114	S1	M4	L5	0.991	1	0.985	50.773	81.79
84317	CCDC115	S354	M4	L5	0.985	0.5	0.965	62.067	51.528
151903	CCDC12	S649	M428	L4	1	0.98	0.967	-12.611	87.552
9720	CCDC144A	S526	M413	L5	0.98	0.945	0.863	61.117	62.221
339184	CCDC144NL	S526	M413	L5	0.99	0.945	0.888	60.524	62.671
115948	CCDC151	S84	M30	L2	0.78	0.67	0.99	-74.048	-43.978
203238	CCDC171	S18	M16	L1	0.99	0.8	0.92	15.032	-21.757
100499483	CCDC180	S299	M3	L2	0.52	0.805	0.954	-94.78	-41.152
28952	CCDC22	S70	M91	L73	1	1	1	-72.515	-86.692
339834	CCDC36	S991	M73	L5	0	0.76	0.385	68.601	64.154
79714	CCDC51	S71	M94	L2	0.99	0.98	0.832	-85.431	-7.484
131076	CCDC58	S19	M17	L6	0.98	0.985	0.35	-87.505	-0.272
8030	CCDC6	S665	M458	L46	1	0.96	0.49	13.615	59.933
84660	CCDC62	S498	M389	L2	0.96	0.66	0.985	-95.705	-25.803
64925	CCDC71	S5	M1	L3	0.724	1	0.98	-14.111	-94.899
91409	CCDC74B	S15	M4	L5	0.73	1	0.985	52.45	59.315
124093	CCDC78	S194	M123	L94	0.975	0.97	0.9	107.041	-24.187
338657	CCDC84	S862	M4	L5	0.71	1	0.985	55.271	69.826
80212	CCDC92	S603	M3	L2	0.855	0.859	0.99	-80.167	-41.171
54520	CCDC93	S730	M1	L3	0.91	0.982	0.98	-29.703	-93.537
257236	CCDC96	S421	M357	L177	1	1	0.915	85.79	-34.586
6370	CCL25	S414	M1	L3	0.875	0.98	0.98	-14.111	-105.109
10344	CCL26	S123	M22	L3	0.809	0.77	0.949	-28.254	-80.245
10850	CCL27	S992	M1	L3	0	0.337	0.97	-39.839	-90.116
9560	CCL4L2	S843	M66	L1	0.97	0.819	0.355	-3.411	-19.168
6352	CCL5	S147	M154	L7	0.975	0.595	0.724	-44.725	28.58
890	CCNA2	S124	M147	L95	1	1	0.97	69.601	-55.085
891	CCNB1	S124	M147	L95	1	1	0.97	70.526	-55.364
85417	CCNB3	S133	M42	L31	1	1	0.83	45.412	-22.425
892	CCNC	S28	M18	L15	0.995	1	0.425	-1.794	46.295
595	CCND1	S68	M68	L43	1	1	0.97	-57.345	12
894	CCND2	S155	M165	L4	0.99	0.87	0.63	21.765	106.585
896	CCND3	S590	M354	L176	1	0.995	0.595	1.81	52.498
898	CCNE1	S159	M170	L109	1	1	0.955	80.538	-77.722
899	CCNF	S357	M319	L183	0.985	0.935	0.705	21.586	-89.769
902	CCNH	S323	M290	L1	0.99	0.865	0.432	3.316	-7.768
54619	CCNJ	S188	M186	L9	0.623	0.863	0.42	-17.419	-6.126
8812	CCNK	S318	M57	L13	0.805	0.945	0.925	42.937	-45.723
57018	CCNL1	S826	M443	L221	0.925	0.895	0.596	14.423	-0.952
81669	CCNL2	S4	M8	L10	0.99	1	0.97	94.839	23.023
904	CCNT1	S7	M6	L8	1	1	0.91	82.471	-17.17
9738	CCP110	S467	M340	L57	0.755	0.883	0.42	-55.999	-41.352
1233	CCR4	S705	M521	L2	0.945	0.399	0.615	-72.23	6.768
9973	CCS	S643	M432	L241	0.99	0.975	0.615	62.376	21.743
10576	CCT2	S624	M479	L1	0.825	0.56	0.515	55.256	22.912
7203	CCT3	S624	M479	L1	0.825	0.56	0.515	55.4	22.565
10575	CCT4	S46	M3	L2	0.8	0.988	0.99	-74.972	-19.13
22948	CCT5	S292	M261	L167	1	1	0.96	31.216	-78.216
908	CCT6A	S79	M1	L3	0.93	0.845	0.98	-10.584	-99.092
10574	CCT7	S18	M16	L1	0.965	0.795	0.92	18.224	-20.97
10694	CCT8	S46	M3	L2	0.919	0.956	0.99	-77.6	-19.114
977	CD151	S468	M1	L3	0.63	0.513	0.98	-8.494	-74.507
912	CD1D	S587	M474	L207	1	1	0.32	-1.449	15.398
30835	CD209	S302	M11	L7	0.755	0.91	0.72	-41.39	9.895
10421	CD2BP2	S891	M45	L36	0.58	0.955	0.81	-14.408	-24.646
124599	CD300LB	S279	M16	L1	0.965	0.621	0.92	17.434	-15.511
10849	CD3EAP	S372	M322	L1	0.96	0.61	0.8	42.968	-9.588
962	CD48	S265	M242	L138	0.987	0.812	0.54	-48.005	-4.536
968	CD68	S698	M601	L3	0.867	0.418	0.828	5.871	-85.877
924	CD7	S147	M154	L7	0.98	0.6	0.724	-46.344	29.934
974	CD79B	S484	M375	L9	1	0.579	0.4	16.835	15.365
926	CD8B	S125	M75	L1	1	0.885	0.48	7.262	1.64
146059	CDAN1	S200	M2	L4	0.964	0.993	0.98	16.362	100.456
8872	CDC123	S1	M4	L5	0.985	1	0.985	53.213	77.387
8555	CDC14B	S169	M39	L1	0.995	0.955	0.482	15.973	6.989
8881	CDC16	S1	M4	L5	0.975	1	0.985	51.138	76.605
991	CDC20	S6	M3	L2	0.629	0.759	0.944	-65.697	-33.411
8697	CDC23	S129	M107	L40	1	1	0.824	2.304	-43.94
993	CDC25A	S91	M38	L17	1	0.955	0.795	-26.441	50.031
994	CDC25B	S124	M147	L95	1	1	0.97	69.455	-54.872
995	CDC25C	S847	M577	L19	1	0.985	0.904	52.835	-63.167
246184	CDC26	S196	M198	L2	1	0.83	0.978	-102.968	-23.519
996	CDC27	S129	M107	L40	1	1	0.824	1.085	-43.796
11140	CDC37	S175	M18	L15	0.61	0.768	0.435	1.892	44.104
55664	CDC37L1	S211	M116	L8	1	0.57	0.9	71.301	-17.935
51362	CDC40	S138	M46	L1	0.99	0.85	0.415	-18.538	-12.368
998	CDC42	S12	M6	L8	0.81	0.995	0.91	90.898	-4.985
23580	CDC42EP4	S230	M12	L1	0.945	0.929	0.47	-17.71	14.088
56882	CDC42SE1	S538	M434	L247	0.975	0.655	0.44	-11.487	79.671
8318	CDC45	S178	M157	L14	1	0.885	0.53	62.247	34.461
988	CDC5L	S75	M1	L3	0.845	0.912	0.975	-2.888	-97.917
990	CDC6	S263	M234	L14	1	0.985	0.634	73.227	41.803
8317	CDC7	S822	M542	L1	0.995	0.69	0.255	9.115	10.628
79577	CDC73	S320	M286	L59	1	1	0.818	20.338	-59.508
113130	CDCA5	S540	M472	L40	0.995	0.625	0.668	22.84	-79.398
83879	CDCA7	S160	M3	L2	0.995	0.518	0.99	-85.627	-19.453
55143	CDCA8	S3	M2	L4	0.691	0.995	1	-0.341	91.375
999	CDH1	S804	M297	L1	0.67	0.475	0.305	-32.864	37.652
1013	CDH15	S955	M647	L43	1	1	0.753	-63.188	12.303
1000	CDH2	S12	M6	L8	0.81	0.995	0.91	89.968	-5.907
64403	CDH24	S21	M25	L1	1	0.6	0.465	0.219	2.489
1003	CDH5	S441	M6	L8	0.96	0.925	0.9	84.406	-4.583
10423	CDIPT	S224	M71	L4	0.335	0.705	0.975	18.481	82.72
983	CDK1	S124	M147	L95	1	1	0.97	68.346	-55.436
8558	CDK10	S257	M126	L20	0.54	0.955	0.78	70.47	10.135
728642	CDK11A	S828	M615	L1	0.975	0.805	0.246	3.269	-40.222
984	CDK11B	S828	M615	L1	0.975	0.805	0.246	3.259	-40.159
51755	CDK12	S318	M57	L13	0.805	0.945	0.925	43.245	-45.314
8621	CDK13	S754	M561	L291	1	1	0.52	-31.881	54.317
1017	CDK2	S159	M170	L109	1	1	0.955	80.648	-77.99
8099	CDK2AP1	S302	M11	L7	0.755	0.91	0.72	-40.529	9.981
10263	CDK2AP2	S40	M34	L3	1	0.47	0.98	-3.11	-67.766
1019	CDK4	S68	M68	L43	1	1	0.97	-57.471	11.958
51654	CDK5RAP1	S319	M285	L3	0.97	0.6	0.98	-34.185	-90.884
55755	CDK5RAP2	S206	M141	L2	0.995	0.955	0.643	-65.124	-40.388
80279	CDK5RAP3	S89	M56	L42	1	1	0.95	39.202	49.027
1021	CDK6	S590	M354	L176	1	0.995	0.595	1.642	52.461
1022	CDK7	S516	M150	L1	0.92	0.96	0.341	-9.148	-0.824
1024	CDK8	S293	M149	L9	1	0.56	0.405	12.696	14.129
1025	CDK9	S993	M666	L5	0	0.782	0.305	-1.791	49.526
54901	CDKAL1	S483	M325	L190	1	0.945	0.845	-0.669	-37.122
50937	CDON	S123	M22	L3	0.765	0.661	0.98	-17.208	-73.977
81620	CDT1	S263	M234	L14	1	0.985	0.634	74.088	42.708
55573	CDV3	S27	M3	L2	0.995	0.835	0.99	-87.923	-42.221
9425	CDYL	S336	M65	L53	0.95	0.961	0.656	-40.173	-47.439
1087	CEACAM7	S695	M10	L1	0.503	0.37	0.92	28.57	-24.39
1050	CEBPA	S77	M79	L39	0.872	0.759	0.5	28.346	-50.494
1051	CEBPB	S898	M610	L292	0.995	0.99	0.467	-66.281	53.924
1054	CEBPG	S913	M332	L1	1	0.628	0.437	25.148	6.198
10153	CEBPZ	S45	M63	L1	1	0.99	0.83	46.828	1.282
1990	CELA1	S5	M1	L3	0.724	1	0.98	-14.894	-94.279
10658	CELF1	S229	M119	L1	0.669	0.777	0.622	-10.889	-30.577
10659	CELF2	S90	M86	L62	1	0.98	0.775	81.668	-49.896
60680	CELF5	S9	M11	L7	0.995	1	0.725	-33.784	11.183
1952	CELSR2	S2	M5	L2	0.954	0.81	0.99	-75.395	-53.164
57214	CEMIP	S27	M3	L2	0.979	0.763	0.954	-90.916	-37.781
1058	CENPA	S349	M282	L159	1	1	0.675	-55.592	-9.301
1059	CENPB	S39	M3	L2	0.935	0.965	0.99	-79.989	-25.856
1060	CENPC	S290	M163	L2	1	0.975	0.512	-78.447	-9.705
1062	CENPE	S842	M184	L38	0.72	0.925	0.825	60.123	-75.634
1063	CENPF	S923	M11	L7	0.985	0.969	0.72	-35.579	21.183
64946	CENPH	S944	M516	L5	1	0.86	0.784	49.664	86.293
2491	CENPI	S173	M76	L29	1	0.985	0.905	-6.847	68.98
55835	CENPJ	S73	M95	L69	0.98	0.98	0.915	32.536	65.146
64105	CENPK	S944	M516	L5	1	0.86	0.784	49.669	86.074
91687	CENPL	S648	M436	L220	0.98	0.985	0.935	73.937	-31.872
55839	CENPN	S172	M2	L4	0.55	1	1	2.686	105.415
79172	CENPO	S148	M1	L3	0.949	0.87	0.98	-5.926	-103.193
80152	CENPT	S901	M163	L2	0.95	0.331	0.561	-77.257	-6.989
387103	CENPW	S901	M163	L2	0.95	0.331	0.561	-77.088	-6.794
201254	CENPX	S93	M2	L4	0.755	0.31	0.755	26.044	89.541
22994	CEP131	S1	M4	L5	1	1	0.985	48.889	73.238
9662	CEP135	S73	M95	L69	0.979	0.959	0.889	31.65	63.718
55125	CEP192	S6	M3	L2	0.991	1	0.99	-70.927	-26.469
80184	CEP290	S622	M502	L2	0.955	0.595	0.88	-91.428	-26.954
85459	CEP295	S2	M5	L2	0.988	0.815	0.99	-68.026	-51.189
9857	CEP350	S594	M480	L250	1	1	0.995	17.435	132.407
55165	CEP55	S757	M270	L7	0.67	0.596	0.435	-39.923	3.401
9702	CEP57	S206	M141	L2	0.995	0.965	0.628	-64.476	-38.496
23177	CEP68	S479	M115	L2	0.625	0.825	0.99	-86.294	-62.457
64793	CEP85	S73	M95	L69	0.974	0.975	0.91	33.75	65.149
10390	CEPT1	S201	M1	L3	0.63	1	0.98	-16.519	-99.925
51148	CERCAM	S529	M417	L5	0.98	0.795	0.968	39.524	61.798
29956	CERS2	S424	M360	L14	1	0.99	0.593	78.483	41.849
23491	CES3	S447	M326	L1	0.91	0.66	0.396	17.481	19.554
283848	CES4A	S337	M257	L163	1	1	0.93	102.839	1.827
29105	CFAP20	S561	M71	L4	0.98	0.729	0.975	20.819	84.251
56683	CFAP298	S604	M4	L5	0.745	0.984	0.985	55.712	80.468
55779	CFAP44	S4	M8	L10	1	0.871	0.97	93.823	17.319
149465	CFAP57	S36	M21	L23	0.58	1	0.875	26.112	27.602
629	CFB	S528	M416	L40	0.945	0.72	0.199	-1.099	-43.735
10428	CFDP1	S924	M4	L5	0.7	0.894	0.985	54.67	66.566
1072	CFL1	S410	M29	L9	0.92	0.972	0.364	11.894	33.45
8837	CFLAR	S157	M144	L26	1	0.585	0.42	35.19	17.308
150356	CHADL	S61	M5	L2	0.586	0.803	0.99	-79.651	-52.338
10036	CHAF1A	S933	M646	L1	0.99	0.685	0.335	-21.762	-17.693
8208	CHAF1B	S933	M646	L1	0.99	0.685	0.335	-22	-17.839
118487	CHCHD1	S33	M43	L6	1	0.745	0.92	-87.899	57.367
51142	CHCHD2	S223	M220	L75	1	0.995	0.8	-49.98	-13.9
54927	CHCHD3	S212	M4	L5	0.535	0.938	0.985	60.028	56.87
1105	CHD1	S12	M6	L8	0.825	0.995	0.91	88.606	-7.957
1106	CHD2	S282	M47	L7	0.955	0.579	0.675	-33.997	6.167
1107	CHD3	S339	M159	L37	0.99	1	0.663	34.425	-85.814
1108	CHD4	S339	M159	L37	0.99	1	0.663	34.144	-86.08
55636	CHD7	S994	M38	L17	0.365	0.59	0.525	-26.095	48.232
57680	CHD8	S469	M372	L1	1	0.959	0.45	-6.423	18.598
1111	CHEK1	S399	M145	L13	0.985	0.916	0.747	36.921	-49.316
10523	CHERP	S295	M46	L1	0.81	0.531	0.335	-19.155	-17.469
1117	CHI3L2	S31	M13	L3	0.988	0.719	0.98	-24.049	-68.291
1119	CHKA	S266	M237	L141	1	0.955	0.99	-37.627	62.233
1121	CHM	S28	M18	L15	0.954	1	0.425	-1.428	44.484
1122	CHML	S164	M158	L37	1	0.89	0.745	36.985	-59.506
27243	CHMP2A	S811	M617	L303	1	1	0.755	-73.007	-9.733
51652	CHMP3	S811	M617	L303	1	1	0.755	-73.006	-9.737
128866	CHMP4B	S623	M466	L5	1	0.97	0.748	72.367	71.562
51510	CHMP5	S995	M144	L26	0	0.43	0.31	44.416	48.005
79643	CHMP6	S210	M213	L5	0.935	0.56	0.985	44.006	81.881
91782	CHMP7	S912	M658	L305	1	1	0.92	-54.375	-22.424
26973	CHORDC1	S354	M4	L5	0.985	0.5	0.965	61.506	52.284
11261	CHP1	S390	M328	L196	1	1	0.995	-37.858	106.096
8646	CHRD	S247	M190	L1	0.595	0.885	0.289	2.329	40.021
57053	CHRNA10	S786	M586	L307	1	1	0.593	36.22	2.451
1140	CHRNB1	S996	M49	L9	0.435	0.522	0.445	-1.567	27.492
1144	CHRND	S857	M632	L284	1	1	0.91	-70.979	28.266
1146	CHRNG	S137	M120	L1	0.995	0.61	0.364	2.462	21.931
23563	CHST5	S674	M444	L253	1	1	0.99	-42.157	45.44
63922	CHTF18	S49	M28	L13	0.995	0.85	0.93	51.547	-43.461
54921	CHTF8	S49	M28	L13	0.995	0.85	0.93	52.139	-44.173
26097	CHTOP	S778	M557	L285	1	0.73	0.615	-23.458	-24.724
1147	CHUK	S195	M197	L26	1	1	0.425	35.231	21.728
9391	CIAO1	S256	M133	L5	0.992	0.533	0.848	66.005	51.505
51647	CIAO2B	S488	M404	L5	0.85	0.623	0.865	64.871	73.619
64428	CIAO3	S687	M4	L5	0.598	0.628	0.975	64.169	73.66
57019	CIAPIN1	S924	M4	L5	0.7	0.894	0.985	54.937	66.831
23152	CIC	S94	M45	L36	1	0.984	0.783	-15.075	-19.819
51550	CINP	S226	M221	L4	0.985	0.795	0.938	11.41	80.796
57650	CIP2A	S832	M616	L268	0.825	0.77	0.42	-87.049	-14.854
9541	CIR1	S272	M241	L4	1	0.985	0.976	5.724	113.755
1153	CIRBP	S620	M137	L104	0.925	1	0.72	-13.301	34.827
11113	CIT	S579	M270	L7	0.995	0.845	0.245	-35.416	35.14
26586	CKAP2	S434	M370	L195	1	1	0.545	-41.701	-96.145
9793	CKAP5	S111	M148	L38	1	1	0.825	62.74	-79.003
1152	CKB	S352	M274	L1	0.965	0.72	0.21	54.383	-20.839
1159	CKMT1B	S530	M119	L1	0.77	0.626	0.756	-12.657	-31.382
1163	CKS1B	S159	M170	L109	1	1	0.955	80.266	-77.162
11129	CLASRP	S561	M71	L4	0.98	0.729	0.975	20.865	84.478
1186	CLCN7	S126	M65	L53	0.945	0.915	0.64	-34.97	-49.881
23562	CLDN14	S497	M26	L22	0.795	0.929	0.236	-28.727	0.999
51208	CLDN18	S43	M59	L50	1	1	0.99	102.24	42.549
9074	CLDN6	S756	M1	L3	0.665	0.773	0.909	-17.825	-109.378
56650	CLDND1	S593	M3	L2	0.895	0.902	0.969	-79.64	-29.865
29121	CLEC2D	S124	M147	L95	1	1	0.97	69.352	-53.866
1192	CLIC1	S438	M373	L192	1	0.875	0.595	-32.588	-8.793
25932	CLIC4	S79	M1	L3	0.855	0.578	0.829	-11.528	-100.925
1196	CLK2	S641	M2	L4	0.465	0.758	0.919	7.867	91.535
1207	CLNS1A	S457	M368	L4	0.98	0.79	0.678	-1.414	87.045
10978	CLP1	S133	M42	L31	0.97	1	0.83	44.459	-23.497
81570	CLPB	S900	M62	L51	0.36	0.99	1	-58.158	68.848
8192	CLPP	S780	M367	L171	0.94	0.985	0.575	-47.678	88.135
1208	CLPS	S304	M253	L158	1	1	0.955	22.782	114.73
10845	CLPX	S33	M43	L6	1	0.745	0.92	-87.022	56.048
63967	CLSPN	S78	M10	L1	0.576	0.345	0.92	27.537	-26.413
1212	CLTB	S151	M12	L1	0.742	0.576	0.34	-26.35	42.216
1213	CLTC	S44	M48	L28	1	0.995	0.99	-23.368	69.646
23277	CLUH	S246	M225	L6	1	0.99	0.442	-91.601	13.667
55907	CMAS	S254	M132	L11	1	0.815	1	-30.774	85.834
100272147	CMC4	S571	M452	L1	1	0.58	0.439	20.361	-4.732
80790	CMIP	S505	M396	L147	0.995	0.825	0.5	38.888	35.547
1240	CMKLR1	S997	M667	L126	0	0	0.495	10.072	-90.544
51727	CMPK1	S199	M205	L3	0.985	0.85	0.946	-5.174	-61.347
123920	CMTM3	S466	M3	L2	0.73	0.835	0.99	-82.13	-38.831
146223	CMTM4	S291	M258	L1	1	0.745	0.92	7.081	-28.424
54918	CMTM6	S384	M5	L2	0.98	0.765	0.965	-66.854	-66.123
23070	CMTR1	S785	M4	L5	0.335	0.979	0.985	56.897	54.979
1261	CNGA3	S231	M50	L3	0.864	0.82	0.735	4.941	-76.181
1258	CNGB1	S164	M158	L37	1	0.92	0.744	33.728	-58.571
10175	CNIH1	S194	M123	L94	0.975	0.97	0.9	105.827	-23.644
29097	CNIH4	S1	M4	L5	1	1	0.985	48.528	80.184
1265	CNN2	S299	M3	L2	0.955	0.833	0.954	-93.865	-38.786
23019	CNOT1	S605	M382	L2	0.99	0.472	0.99	-81.775	-15.747
25904	CNOT10	S605	M382	L2	0.99	0.472	0.99	-82.317	-15.763
4848	CNOT2	S536	M427	L240	0.995	0.985	0.87	-2.754	119.314
4849	CNOT3	S536	M427	L240	0.995	0.985	0.87	-2.677	119.16
246175	CNOT6L	S998	M86	L62	0.766	0.611	0.58	81.202	-47.56
29883	CNOT7	S536	M427	L240	0.99	0.98	0.865	-3.176	120.145
9125	CNOT9	S605	M382	L2	0.99	0.472	0.99	-83.008	-15.9
1267	CNP	S379	M316	L9	1	0.99	0.382	6.64	28.829
10330	CNPY2	S116	M93	L27	1	1	0.76	26.305	57.56
245812	CNPY4	S591	M4	L5	0.99	0.76	0.985	60.503	66.141
124817	CNTD1	S197	M5	L2	0.645	0.78	0.945	-65.58	-61.885
6900	CNTN2	S260	M1	L3	0.416	0.563	0.98	-8.017	-77.196
80347	COASY	S17	M19	L11	0.79	0.543	1	-37.792	89.998
22837	COBLL1	S11	M10	L1	1	1	0.92	28.508	-19.242
1690	COCH	S864	M620	L1	0.961	0.385	0.905	15.505	-32.383
9382	COG1	S193	M195	L125	1	1	0.99	97.639	-55.048
22796	COG2	S7	M6	L8	0.55	1	0.91	79.733	-16.368
83548	COG3	S315	M2	L4	0.685	0.899	1	10.634	99.018
25839	COG4	S193	M195	L125	1	1	0.99	97.273	-54.815
10466	COG5	S193	M195	L125	1	1	0.99	98.286	-54.829
57511	COG6	S193	M195	L125	1	1	0.99	98.432	-55.603
91949	COG7	S193	M195	L125	1	1	0.99	98.092	-55.058
84342	COG8	S1	M4	L5	0.89	0.852	0.985	51.936	68.056
8161	COIL	S76	M67	L41	0.515	0.975	0.89	46.721	26.088
1302	COL11A2	S483	M325	L190	1	0.945	0.845	-1.102	-37.163
1308	COL17A1	S969	M574	L160	0.995	0.995	0.52	22.997	-6.502
84570	COL25A1	S22	M14	L1	1	0.465	0.92	18.572	-28.718
10087	COL4A3BP	S676	M236	L140	1	0.955	0.705	56.387	-34.926
1293	COL6A3	S9	M11	L7	0.97	1	0.725	-30.133	11.311
1294	COL7A1	S770	M159	L37	0.65	0.98	0.667	30.471	-86.787
1295	COL8A1	S417	M352	L1	1	0.97	0.481	0.812	-22.236
1296	COL8A2	S41	M27	L16	0.965	0.965	0.585	59.078	-15.298
1297	COL9A1	S433	M369	L28	1	0.93	0.8	-23.576	77.717
1299	COL9A3	S222	M219	L133	1	0.991	0.825	60.2	-53.238
51397	COMMD10	S70	M91	L73	1	1	1	-72.388	-85.233
23412	COMMD3	S70	M91	L73	1	1	1	-72.774	-86.931
28991	COMMD5	S70	M91	L73	1	1	1	-72.387	-84.686
54951	COMMD8	S70	M91	L73	1	1	1	-72.3	-86.317
1312	COMT	S743	M550	L277	1	0.77	0.382	58.444	4.886
64326	COP1	S482	M355	L180	1	1	0.955	59.765	-59.981
1314	COPA	S325	M273	L168	1	1	0.78	86.459	-68.25
1315	COPB1	S914	M579	L2	1	0.958	0.915	-71.494	-15.93
9276	COPB2	S325	M273	L168	1	1	0.78	86.584	-68.065
11316	COPE	S325	M273	L168	1	1	0.78	86.717	-69.174
22820	COPG1	S204	M209	L132	1	1	1	89.249	39.096
9318	COPS2	S101	M16	L1	0.755	0.555	0.875	6.402	-33.487
8533	COPS3	S101	M16	L1	0.755	0.555	0.875	6.137	-32.986
51138	COPS4	S18	M16	L1	0.99	0.8	0.92	15.783	-24.48
10987	COPS5	S101	M16	L1	0.755	0.555	0.875	5.619	-33.382
10980	COPS6	S101	M16	L1	0.755	0.555	0.875	5.976	-34.361
50813	COPS7A	S101	M16	L1	0.755	0.555	0.875	6.008	-32.19
10920	COPS8	S101	M16	L1	0.755	0.555	0.875	5.798	-33.482
150678	COPS9	S21	M25	L1	0.65	0.395	0.315	0.317	0.44
22818	COPZ1	S325	M273	L168	1	1	0.78	86.875	-67.714
84274	COQ5	S742	M9	L12	0.555	0.905	0.885	-102.99	32.913
51004	COQ6	S38	M32	L24	0.922	1	0.445	-78.621	58.921
10229	COQ7	S33	M43	L6	1	0.745	0.92	-86.568	58.092
56997	COQ8A	S2	M5	L2	0.456	0.824	0.98	-73.194	-65.578
79934	COQ8B	S270	M166	L96	1	1	0.57	-57.936	25.447
23603	CORO1C	S117	M138	L49	0.97	0.96	0.38	20.995	13.084
84940	CORO6	S663	M446	L6	1	0.97	0.731	-69.236	33.979
1352	COX10	S23	M9	L12	0.995	1	0.885	-90.456	30.311
1353	COX11	S23	M9	L12	0.995	1	0.885	-88.635	30.37
1355	COX15	S551	M464	L12	0.9	0.755	0.77	-102.156	37.427
10063	COX17	S551	M464	L12	0.905	0.755	0.87	-101.855	36.301
285521	COX18	S33	M43	L6	1	0.745	0.92	-85.952	58.84
116228	COX20	S899	M564	L6	0.995	0.541	0.442	-94.313	14.827
1327	COX4I1	S23	M9	L12	0.995	1	0.885	-90.31	29.657
84701	COX4I2	S675	M35	L9	0.59	0.929	0.389	41.839	15.387
9377	COX5A	S999	M668	L12	0.835	0.79	0.37	-85.874	24.122
1329	COX5B	S23	M9	L12	0.995	1	0.885	-91.177	28.001
1337	COX6A1	S23	M9	L12	0.965	0.995	0.885	-92.309	28.608
1340	COX6B1	S23	M9	L12	0.995	1	0.885	-89.535	25.784
1345	COX6C	S8	M7	L6	0.74	0.745	0.84	-87.183	35.945
1349	COX7B	S560	M380	L29	0.735	0.296	0.492	1.764	78.525
1350	COX7C	S13	M9	L12	0.776	0.915	0.885	-94.296	30.232
27151	CPAMD8	S282	M47	L7	0.955	0.579	0.675	-33.283	7.057
1362	CPD	S116	M93	L27	1	1	0.76	24.099	58.528
1363	CPE	S582	M462	L1	1	0.85	0.641	2.993	-12.635
27132	CPNE7	S1	M4	L5	0.985	1	0.985	54.484	78.281
1371	CPOX	S733	M2	L4	0.505	0.909	0.865	-1.513	111.362
29894	CPSF1	S75	M1	L3	0.79	0.985	0.98	-4.561	-94.858
53981	CPSF2	S599	M280	L144	1	1	0.86	65.477	94.98
51692	CPSF3	S148	M1	L3	0.923	0.778	0.98	-15.803	-80.662
10898	CPSF4	S58	M2	L4	0.41	1	1	13.671	88.737
79869	CPSF7	S158	M168	L111	1	1	0.905	-72.839	-70.381
1376	CPT2	S602	M508	L3	0.96	0.404	0.307	-30.661	-12.632
1379	CR1L	S1000	M58	L18	0	1	0.985	41.914	-86.277
57585	CRAMP1	S782	M580	L147	0.945	0.935	0.774	31.622	47.77
27297	CRCP	S58	M2	L4	0.41	1	1	14.726	88.902
1385	CREB1	S941	M566	L295	1	1	0.49	84.368	-53.966
10488	CREB3	S1001	M669	L1	0.562	0	0.404	14.148	24.169
1387	CREBBP	S360	M55	L1	0.865	0.727	0.29	-17.693	33.893
51232	CRIM1	S10	M15	L7	1	0.705	0.725	-39.863	24.039
9419	CRIPT	S288	M66	L1	0.99	0.639	0.291	-48.413	67.078
1398	CRK	S7	M6	L8	1	1	0.91	86.103	-14.026
1399	CRKL	S7	M6	L8	1	1	0.91	84.239	-14.796
54675	CRLS1	S407	M62	L51	1	0.959	1	-61.582	68.296
51340	CRNKL1	S110	M129	L57	1	0.98	0.425	-25.276	37.092
49860	CRNN	S249	M55	L1	0.99	0.83	0.374	-15.78	28.567
64784	CRTC3	S114	M135	L100	0.99	0.99	0.975	65.872	-63.501
1406	CRX	S9	M11	L7	0.945	1	0.725	-37.75	15.242
1411	CRYBA1	S226	M221	L4	0.985	0.795	0.938	12.45	78.78
1418	CRYGA	S196	M198	L2	1	0.83	0.978	-102.058	-24.229
1419	CRYGB	S6	M3	L2	0.795	1	0.99	-75.098	-28.626
1421	CRYGD	S538	M434	L247	0.975	0.655	0.44	-11.988	79.192
51084	CRYL1	S21	M25	L1	1	0.6	0.465	-0.018	2.057
1431	CS	S1002	M23	L6	0	0.856	0.803	-74.703	34.939
7812	CSDE1	S806	M526	L321	1	1	0.98	-68.963	12.724
1434	CSE1L	S135	M13	L3	0.705	0.673	0.98	-17.869	-59.463
1436	CSF1R	S284	M82	L17	0.925	0.87	0.633	-35.369	48.967
1439	CSF2RB	S16	M12	L1	0.99	1	0.47	-11.631	9.937
64478	CSMD1	S335	M128	L99	1	1	0.695	-28.299	26.486
1452	CSNK1A1	S153	M161	L120	0.98	0.995	0.616	51.214	-7.86
1453	CSNK1D	S162	M153	L1	1	0.945	0.53	49.331	-9.967
1457	CSNK2A1	S415	M350	L173	1	1	0.78	109.86	-34.432
1459	CSNK2A2	S415	M350	L173	1	1	0.78	109.468	-34.381
1460	CSNK2B	S415	M350	L173	1	1	0.78	110.001	-34.453
1464	CSPG4	S37	M36	L34	1	1	0.545	-3.634	-7.696
1474	CST6	S38	M32	L24	0.738	1	0.445	-72.074	57.704
1477	CSTF1	S263	M234	L14	1	0.985	0.634	74.296	41.552
1478	CSTF2	S1003	M387	L3	0.89	0.633	0.87	2.515	-91.493
1479	CSTF3	S3	M2	L4	0.691	0.995	1	0.314	91.463
128817	CSTL1	S5	M1	L3	0.983	1	0.98	-26.561	-94.441
64693	CTAGE1	S569	M128	L99	0.975	0.994	0.622	-30.675	31.538
643854	CTAGE9	S15	M4	L5	0.599	0.725	0.965	48.919	59.805
1487	CTBP1	S668	M445	L254	1	1	0.995	73.652	80.226
1488	CTBP2	S668	M445	L254	1	1	0.995	73.502	80.355
80169	CTC1	S46	M3	L2	0.76	0.778	0.91	-76.767	-17.333
10664	CTCF	S370	M307	L1	1	0.935	0.285	-12.622	-14.487
23399	CTDNEP1	S848	M627	L319	1	1	0.452	-40.796	-62.977
9150	CTDP1	S295	M46	L1	0.81	0.531	0.335	-17.375	-15.915
10106	CTDSP2	S920	M1	L3	0.9	0.906	0.97	-21.747	-104.591
51496	CTDSPL2	S348	M271	L165	1	0.95	0.815	-27.764	-42.59
1489	CTF1	S1004	M1	L3	0	0.699	0.98	-27.168	-101.878
1493	CTLA4	S493	M486	L3	0.99	0.585	0.718	-44.31	-21.017
1499	CTNNB1	S606	M489	L239	1	0.985	0.58	112.532	-23.346
56998	CTNNBIP1	S588	M475	L215	1	1	0.915	-74.018	0.522
56259	CTNNBL1	S26	M31	L21	0.672	0.763	0.755	28.53	-64.108
1500	CTNND1	S11	M10	L1	1	1	0.92	33.124	-18.789
1503	CTPS1	S254	M132	L11	1	0.815	1	-32.726	87.056
56474	CTPS2	S260	M1	L3	0.357	0.969	0.98	-15.411	-101.456
9646	CTR9	S320	M286	L59	1	1	0.818	20.943	-59.089
5476	CTSA	S148	M1	L3	0.97	0.87	0.98	-13.003	-89.986
90353	CTU1	S53	M73	L5	1	0.91	0.399	70.515	62.431
348180	CTU2	S53	M73	L5	1	0.91	0.399	70.151	61.766
8454	CUL1	S436	M11	L7	0.59	0.484	0.47	-29.529	18.138
8453	CUL2	S144	M96	L4	0.99	0.735	1	20.677	95.201
8452	CUL3	S703	M585	L314	0.855	0.82	0.341	-48.387	-67.513
8451	CUL4A	S328	M287	L148	0.66	0.64	0.495	12.808	-35.561
8450	CUL4B	S14	M1	L3	0.66	1	0.98	-2.449	-92.42
9820	CUL7	S512	M24	L2	0.66	0.674	0.99	-98.883	-19.985
23113	CUL9	S7	M6	L8	0.66	1	0.91	86.755	-21.041
23316	CUX2	S556	M169	L8	1	0.663	0.51	62.83	-24.518
57703	CWC22	S312	M279	L153	1	0.955	0.755	30.811	-42.849
54883	CWC25	S630	M4	L5	0.755	0.995	0.985	57.604	66.355
55280	CWF19L1	S138	M46	L1	0.995	0.85	0.415	-21.34	-11.672
6387	CXCL12	S355	M169	L8	1	0.65	0.515	60.733	-22.342
58191	CXCL16	S1005	M670	L3	0	0	0.915	-33.51	-82.595
284340	CXCL17	S308	M124	L2	0.69	0.71	0.925	-78.057	-63.601
2920	CXCL2	S647	M433	L211	1	1	0.795	-56.363	85.948
7852	CXCR4	S420	M308	L110	1	1	0.955	-48.503	46.399
30827	CXXC1	S557	M442	L252	1	0.985	0.83	-14.407	63.462
1534	CYB561	S317	M281	L151	0.897	0.805	0.66	9.769	-97.402
80777	CYB5B	S136	M84	L61	1	1	0.905	90.138	50.62
51167	CYB5R4	S502	M393	L143	0.96	0.97	0.735	54.173	12.207
79415	CYBC1	S4	M8	L10	0.99	1	0.97	94.45	22.575
1537	CYC1	S23	M9	L12	0.995	1	0.885	-88.112	29.819
54205	CYCS	S13	M9	L12	0.7	0.915	0.885	-95.186	28.256
23191	CYFIP1	S338	M260	L47	0.8	0.77	0.465	-54.632	-34.987
50626	CYHR1	S313	M247	L145	0.995	0.97	0.785	-54.708	35.12
1540	CYLD	S706	M166	L96	0.815	0.62	0.58	-60.605	23.845
340665	CYP26C1	S385	M324	L189	1	1	0.58	-34.171	-1.377
1594	CYP27B1	S1006	M6	L8	0.326	0.64	0.71	89.615	-23.862
113612	CYP2U1	S10	M15	L7	1	0.705	0.725	-39.26	24.231
54905	CYP2W1	S930	M70	L44	0.52	0.979	0.67	-31.477	-27.52
57834	CYP4F11	S56	M22	L3	0.576	0.395	0.585	-15.685	-72.237
8529	CYP4F2	S16	M12	L1	0.991	0.995	0.47	-7.38	8.477
126410	CYP4F22	S105	M5	L2	0.973	0.443	0.86	-58.229	-68.299
1602	DACH1	S443	M330	L65	1	0.834	0.575	112.75	8.463
1603	DAD1	S204	M209	L132	1	1	1	90.223	38.557
221955	DAGLB	S130	M143	L5	0.881	0.609	0.946	41.873	60.274
199699	DAND5	S914	M579	L2	1	0.958	0.915	-71.735	-15.951
7818	DAP3	S33	M43	L6	1	0.745	0.92	-83.207	56.727
1615	DARS	S45	M63	L1	0.985	0.99	0.824	45.536	4.334
55157	DARS2	S899	M564	L6	0.995	0.541	0.442	-94.099	14.644
1616	DAXX	S950	M568	L306	0.975	0.925	0.615	71.742	-61.732
26528	DAZAP1	S960	M504	L3	0.94	0.535	0.878	-10.595	-62.165
10926	DBF4	S822	M542	L1	0.995	0.69	0.255	9.102	10.628
1622	DBI	S682	M51	L25	0.497	0.954	0.465	-24.512	-51.988
51163	DBR1	S833	M133	L5	0.66	0.477	0.765	62.916	49.428
285429	DCAF4L1	S104	M10	L1	0.638	0.994	0.92	22.432	-13.84
55827	DCAF6	S328	M287	L148	0.985	0.96	0.675	11.828	-36.969
51473	DCDC2	S27	M3	L2	0.985	0.835	0.99	-85.092	-40.083
9201	DCLK1	S127	M40	L1	0.867	0.723	0.467	29.202	3.238
64858	DCLRE1B	S156	M167	L123	1	1	0.945	51.364	-54.99
64421	DCLRE1C	S293	M149	L9	1	0.56	0.405	14.237	14.117
167227	DCP2	S181	M101	L77	0.885	0.908	0.8	30.98	39.751
28960	DCPS	S359	M292	L130	0.84	0.885	0.42	-41.908	-71.528
1638	DCT	S125	M75	L1	0.869	0.885	0.48	4.547	0.601
1639	DCTN1	S40	M34	L3	0.97	0.46	0.98	-3.584	-72.021
10540	DCTN2	S268	M88	L5	0.98	0.655	0.475	50.237	45.656
11258	DCTN3	S499	M184	L38	0.975	0.942	0.79	58.226	-75.09
51164	DCTN4	S52	M2	L4	0.84	0.995	1	11.652	86.56
84516	DCTN5	S373	M310	L5	1	0.795	0.98	55.244	52.42
10671	DCTN6	S268	M88	L5	0.98	0.655	0.475	50.102	44.515
79077	DCTPP1	S2	M5	L2	0.903	0.835	0.99	-73.558	-55.734
54165	DCUN1D1	S353	M183	L115	1	1	0.815	-62.644	-16.687
51181	DCXR	S31	M13	L3	0.399	0.359	0.717	0.864	-77.023
79016	DDA1	S131	M4	L5	0.45	1	0.985	53.029	65.162
1642	DDB1	S86	M112	L1	0.935	0.93	0.36	5.582	7.432
1644	DDC	S201	M1	L3	0.625	1	0.98	-18.139	-101.526
23259	DDHD2	S465	M51	L25	0.8	0.417	0.32	-20.018	30.244
84301	DDI2	S601	M487	L210	1	1	1	47.966	-109.974
1649	DDIT3	S649	M428	L4	1	0.98	0.967	-12.682	87.29
54541	DDIT4	S146	M81	L58	1	0.995	0.82	-56.102	31.038
1650	DDOST	S965	M5	L2	0.75	0.766	0.985	-69.839	-65.177
780	DDR1	S158	M168	L111	0.985	1	0.905	-74.285	-72.769
65992	DDRGK1	S89	M56	L42	1	1	0.95	41.626	50.362
1653	DDX1	S1007	M71	L4	0.32	0.675	0.88	19.296	81.725
1662	DDX10	S4	M8	L10	1	1	0.97	94.229	13.339
10521	DDX17	S251	M42	L31	0.97	0.605	0.693	18.631	59.442
8886	DDX18	S45	M63	L1	1	0.99	0.83	45.733	2.048
55308	DDX19A	S292	M261	L167	1	1	0.96	30.766	-76.903
11269	DDX19B	S483	M325	L190	1	0.945	0.845	-0.434	-37.099
11218	DDX20	S22	M14	L1	1	0.451	0.92	23.656	-33.282
9188	DDX21	S103	M87	L1	1	0.75	0.824	50.542	2.081
9416	DDX23	S891	M45	L36	0.58	0.955	0.81	-14.152	-24.527
57062	DDX24	S221	M57	L13	1	0.96	0.92	40.855	-45.294
55661	DDX27	S166	M74	L1	0.995	0.99	0.855	39.028	-10.447
55794	DDX28	S29	M7	L6	0.864	0.99	0.93	-84.868	50.022
10212	DDX39A	S634	M490	L3	0.98	0.5	0.964	-23.008	-61.622
7919	DDX39B	S48	M44	L9	0.545	0.92	0.462	10.06	23.071
1654	DDX3X	S889	M656	L3	0.84	0.555	0.887	-0.624	-95.495
54514	DDX4	S24	M33	L32	1	1	0.99	64.037	-34.084
51428	DDX41	S341	M64	L1	0.89	0.899	0.505	8.523	-5.857
11325	DDX42	S412	M337	L1	1	0.92	0.601	6.613	-41.376
9879	DDX46	S341	M64	L1	0.87	0.828	0.518	10.123	-6.17
51202	DDX47	S368	M341	L174	1	0.995	0.675	11.868	-85.801
54555	DDX49	S285	M252	L1	0.995	0.52	0.271	-15.879	-35.123
1655	DDX5	S21	M25	L1	1	0.6	0.465	-2.001	1.514
317781	DDX51	S45	M63	L1	0.925	0.99	0.83	43.955	2.347
11056	DDX52	S314	M74	L1	0.885	0.989	0.855	38.089	-13.773
79039	DDX54	S45	M63	L1	1	0.99	0.83	44.839	0.59
57696	DDX55	S403	M1	L3	0.93	0.398	0.925	-25.239	-104.454
54606	DDX56	S814	M556	L1	0.985	0.593	0.362	-7.462	34.396
83479	DDX59	S203	M130	L8	1	1	0.655	70.808	-10.782
1656	DDX6	S181	M101	L77	0.505	1	0.976	51.858	97.604
1670	DEFA5	S1008	M223	L3	0.862	0.5	0.878	-26.598	-63.866
9909	DENND4B	S2	M5	L2	0.812	0.84	0.99	-67.252	-55.508
160518	DENND5B	S162	M153	L1	0.919	0.93	0.544	48.077	-13.073
8562	DENR	S503	M395	L55	1	0.99	0.905	-53.484	-4.963
55635	DEPDC1	S600	M398	L2	1	0.735	0.952	-92.84	-45.627
79139	DERL1	S99	M109	L27	1	0.945	0.535	30.766	56.327
51009	DERL2	S577	M268	L169	0.505	0.78	0.716	-57.326	-55.991
55070	DET1	S482	M355	L180	1	1	0.955	59.734	-59.832
28955	DEXI	S591	M4	L5	0.99	0.76	0.985	61.197	66.85
54487	DGCR8	S132	M3	L2	0.885	1	0.99	-73.106	-33.299
8526	DGKE	S200	M2	L4	0.97	0.993	1	15.454	99.094
1717	DHCR7	S126	M65	L53	0.589	0.835	0.52	-31.559	-48.768
79947	DHDDS	S797	M57	L13	0.635	0.913	0.905	56.642	-46.671
1719	DHFR	S849	M132	L11	1	0.463	1	-35.292	87.751
1723	DHODH	S254	M132	L11	1	0.815	1	-31.713	86.181
1725	DHPS	S64	M1	L3	0.925	0.528	0.98	-11.134	-75.789
147015	DHRS13	S513	M12	L1	0.98	0.552	0.467	-13.306	21.472
9249	DHRS3	S419	M92	L30	0.377	0.464	0.635	71.621	-44.34
207063	DHRSX	S351	M256	L4	0.875	0.615	0.954	7.861	78.093
1665	DHX15	S129	M107	L40	0.98	0.98	0.804	2.48	-42.077
8449	DHX16	S255	M162	L121	1	1	0.96	25.675	44.385
54505	DHX29	S28	M18	L15	0.741	0.9	0.41	-1.606	42.048
22907	DHX30	S42	M23	L6	0.99	0.925	0.808	-71.69	37.247
56919	DHX33	S256	M133	L5	1	0.533	0.854	64.611	50.786
60625	DHX35	S188	M186	L9	0.575	0.855	0.42	-19.254	-8.055
170506	DHX36	S167	M182	L21	0.94	0.705	0.955	25.641	-67.494
57647	DHX37	S45	M63	L1	1	0.99	0.83	45.065	0.846
9785	DHX38	S1009	M660	L1	0.75	0.925	0.234	-5.538	-48.297
79132	DHX58	S409	M39	L1	0.745	0.769	0.399	12.351	76.836
1659	DHX8	S138	M46	L1	0.99	0.85	0.415	-19.438	-12.261
1660	DHX9	S389	M327	L79	1	0.95	0.382	-36.684	-9.825
56616	DIABLO	S954	M1	L3	0.72	0.804	0.98	-24.282	-86.974
1729	DIAPH1	S416	M44	L9	0.97	0.628	0.44	5.425	15.613
81624	DIAPH3	S12	M6	L8	0.825	0.995	0.91	92.371	-8.748
23405	DICER1	S801	M576	L318	1	1	0.779	62.584	-47.331
11083	DIDO1	S35	M37	L19	1	1	0.975	45.649	-61.95
27292	DIMT1	S98	M102	L1	1	0.64	0.84	40.676	-4.553
57609	DIP2B	S290	M163	L2	1	0.975	0.512	-78.497	-10.148
22894	DIS3	S541	M156	L113	0.95	0.92	0.714	36.388	44.259
115752	DIS3L	S603	M3	L2	0.855	0.859	0.99	-79.964	-41.673
1736	DKC1	S40	M34	L3	1	0.47	0.98	-5.207	-68.296
22943	DKK1	S273	M137	L104	1	1	0.755	-34.453	28.762
27123	DKK2	S736	M80	L35	0.915	0.862	0.382	-84.597	20.129
27122	DKK3	S201	M1	L3	0.625	1	0.98	-17.87	-101.135
1737	DLAT	S266	M237	L141	1	0.955	0.99	-38.585	62.064
1738	DLD	S119	M108	L52	1	1	0.54	-51.5	82.626
1742	DLG4	S426	M122	L93	1	1	0.935	6.688	54.004
9231	DLG5	S7	M6	L8	0.415	0.941	0.87	77.634	-16.206
9787	DLGAP5	S111	M148	L38	1	1	0.825	60.989	-79.219
8788	DLK1	S49	M28	L13	1	0.855	0.935	47.693	-46.288
1743	DLST	S119	M108	L52	1	1	0.54	-50.163	82.784
1745	DLX1	S763	M61	L48	1	0.913	0.815	73.182	-7.638
1747	DLX3	S472	M334	L4	0.935	0.64	0.385	50.347	28.325
90871	DMAC1	S13	M9	L12	1	0.915	0.885	-99.677	33.599
55929	DMAP1	S37	M36	L34	0.99	0.995	0.53	-9.585	-8.262
11144	DMC1	S887	M14	L1	0.895	0.356	0.92	15.581	-29.655
93099	DMKN	S494	M483	L2	0.9	0.67	0.565	-53.006	-28.725
1657	DMXL1	S154	M164	L65	1	1	0.7	-18.277	74.98
123872	DNAAF1	S122	M3	L2	0.745	0.834	0.99	-81.833	-45.456
54919	DNAAF5	S477	M55	L1	0.92	0.392	0.296	-8.16	37.992
196385	DNAH10	S71	M94	L2	1	0.985	0.843	-86.076	-10.619
3301	DNAJA1	S334	M259	L1	1	0.905	0.375	-14.181	42.278
10294	DNAJA2	S176	M1	L3	0.95	0.748	0.98	-20.536	-79.445
9093	DNAJA3	S322	M289	L149	1	0.885	0.62	-39.14	-74.451
3337	DNAJB1	S172	M2	L4	0.55	1	1	3.457	104.514
54788	DNAJB12	S172	M2	L4	0.578	0.98	0.97	1.27	107.646
10049	DNAJB6	S257	M126	L20	0.493	1	0.82	70.289	8.439
55735	DNAJC11	S564	M62	L51	0.97	0.933	0.942	-60.309	70.545
23341	DNAJC16	S9	M11	L7	0.995	1	0.725	-35.49	11.747
55192	DNAJC17	S3	M2	L4	0.767	1	1	-3.742	95.631
131118	DNAJC19	S633	M423	L231	1	0.97	0.73	-61.594	41.227
27000	DNAJC2	S103	M87	L1	0.995	0.766	0.744	53.242	1.92
134218	DNAJC21	S519	M56	L42	0.535	1	0.87	39.984	50.704
85479	DNAJC5B	S11	M10	L1	1	1	0.92	30.399	-19.091
285126	DNAJC5G	S207	M3	L2	0.935	0.566	0.985	-89.889	-23.401
7266	DNAJC7	S602	M508	L3	0.96	0.404	0.307	-31.533	-13.369
22826	DNAJC8	S84	M30	L2	0.845	0.615	0.99	-80.953	-19.828
23234	DNAJC9	S687	M4	L5	0.583	0.633	0.975	62.671	74.179
7802	DNALI1	S71	M94	L2	0.91	0.985	0.843	-88.201	-10.14
373863	DND1	S613	M499	L233	1	0.985	0.475	63.021	-41.037
10059	DNM1L	S42	M23	L6	0.985	0.925	0.808	-74.047	40.901
1785	DNM2	S44	M48	L28	1	0.99	0.995	-25.641	71.507
26052	DNM3	S9	M11	L7	0.995	1	0.725	-35.499	13.904
1786	DNMT1	S370	M307	L1	1	0.935	0.285	-14.479	-14.582
1789	DNMT3B	S214	M215	L20	0.995	0.955	0.825	63.51	5.961
116092	DNTTIP1	S895	M1	L3	0.805	0.911	0.97	0.885	-87.21
30836	DNTTIP2	S66	M1	L3	0.99	0.47	0.98	-8.38	-82.543
80005	DOCK5	S7	M6	L8	1	1	0.91	86.37	-14.364
85440	DOCK7	S623	M466	L5	1	0.97	0.748	71.998	70.973
9046	DOK2	S532	M422	L2	0.76	0.645	0.974	-95.223	-31.08
55715	DOK4	S11	M10	L1	0.916	0.99	0.915	24.291	-19.911
22845	DOLK	S212	M4	L5	0.335	0.969	0.985	58.266	55.131
57171	DOLPP1	S351	M256	L4	0.965	0.635	1	7.105	78.826
29980	DONSON	S1	M4	L5	1	1	0.985	46.719	76.742
1798	DPAGT1	S3	M2	L4	0.291	0.985	1	12.55	93.184
64174	DPEP2	S608	M155	L3	0.86	0.928	0.818	-17.833	-50.966
5977	DPF2	S97	M104	L7	1	0.905	0.485	-43.01	36.495
1801	DPH1	S449	M122	L93	1	1	0.962	80.315	60.266
1802	DPH2	S449	M122	L93	1	1	0.962	80.133	60.249
285381	DPH3	S53	M73	L5	0.587	0.475	0.84	66.366	61.532
51611	DPH5	S449	M122	L93	1	1	0.962	80.602	60.287
92715	DPH7	S22	M14	L1	0.774	0.45	0.92	23.392	-30.004
8813	DPM1	S60	M83	L66	0.944	1	0.875	21.614	52.605
8818	DPM2	S60	M83	L66	0.944	1	0.875	21.693	53.286
57628	DPP10	S385	M324	L189	1	1	0.58	-35.529	-0.179
29952	DPP7	S10	M15	L7	1	0.705	0.725	-45.366	20.127
91039	DPP9	S420	M308	L110	0.995	0.995	0.96	-49.385	45.275
151871	DPPA2	S321	M115	L2	0.995	0.86	0.99	-85.48	-59.678
283417	DPY19L2	S15	M4	L5	0.599	0.725	0.965	49.323	59.815
147991	DPY19L3	S11	M10	L1	0.995	1	0.92	26.32	-13.771
84661	DPY30	S581	M408	L242	1	1	0.98	33.877	33.638
1810	DR1	S298	M254	L106	1	1	0.965	1.513	59.802
128338	DRAM2	S104	M10	L1	0.568	0.961	0.92	21.526	-18.073
10589	DRAP1	S298	M254	L106	1	1	0.965	1.849	59.629
4733	DRG1	S910	M645	L4	0.955	0.8	0.992	-2.359	80.999
29102	DROSHA	S292	M261	L167	1	1	0.96	31.81	-79.087
1823	DSC1	S456	M75	L1	0.68	0.802	0.465	4.984	-1.431
1825	DSC3	S379	M316	L9	1	0.99	0.382	5.51	27.439
79075	DSCC1	S49	M28	L13	0.995	0.85	0.93	51.947	-43.956
79980	DSN1	S347	M139	L45	1	0.918	0.57	-69.277	-12.429
1834	DSPP	S9	M11	L7	0.99	0.995	0.72	-38.506	11.131
25778	DSTYK	S471	M347	L186	0.995	0.995	0.87	6.819	69.827
112487	DTD2	S113	M134	L103	0.99	0.995	0.985	-36.869	69.641
51514	DTL	S86	M112	L1	1	0.995	0.33	3.903	7.427
196403	DTX3	S490	M383	L9	1	0.9	0.23	-19.419	0.737
1841	DTYMK	S440	M305	L11	1	0.82	0.99	-35.223	94.171
50506	DUOX2	S34	M26	L22	0.994	0.965	0.24	-23.446	4.382
405753	DUOXA2	S603	M3	L2	0.855	0.859	0.99	-79.114	-41.49
54920	DUS2	S667	M51	L25	0.925	0.964	0.465	-23.203	-54.179
11221	DUSP10	S265	M242	L138	0.98	0.975	0.475	-49.66	-4.219
51207	DUSP13	S243	M228	L1	0.995	0.759	0.46	-12.784	24.545
11072	DUSP14	S140	M106	L1	0.995	0.575	0.705	4.448	-16.559
56940	DUSP22	S360	M55	L1	0.853	0.606	0.258	-17.278	34.855
1846	DUSP4	S688	M515	L267	1	0.977	0.75	-14.228	-40.415
1847	DUSP5	S555	M441	L251	1	1	0.99	43.141	-102.044
1848	DUSP6	S9	M11	L7	0.945	1	0.725	-39.625	15.103
1854	DUT	S310	M276	L11	1	0.97	0.896	-42.029	95.92
1857	DVL3	S155	M165	L4	0.985	0.835	0.67	22.093	104.25
1778	DYNC1H1	S396	M331	L3	0.98	0.785	0.868	-3.453	-55.997
1781	DYNC1I2	S18	M16	L1	0.68	0.69	0.899	15.873	-19.663
1783	DYNC1LI2	S499	M184	L38	0.975	0.942	0.79	56.976	-74.476
51626	DYNC2LI1	S122	M3	L2	0.745	0.834	0.99	-81.44	-45.965
8655	DYNLL1	S815	M595	L322	1	1	0.965	58.355	90.857
83658	DYNLRB1	S18	M16	L1	0.674	0.685	0.894	15.887	-18.629
6993	DYNLT1	S15	M4	L5	0.657	1	0.985	52.666	56.882
6990	DYNLT3	S264	M235	L137	0.845	0.81	0.61	-49.379	-76.569
1859	DYRK1A	S334	M259	L1	1	0.905	0.375	-14.036	41.366
8798	DYRK4	S959	M642	L21	0.945	0.57	0.304	42.421	-64.515
1869	E2F1	S220	M218	L67	1	1	0.99	75.557	-74.194
1871	E2F3	S220	M218	L67	1	1	0.99	76.267	-73.419
1874	E2F4	S399	M145	L13	1	0.949	0.468	48.538	10.718
1875	E2F5	S24	M33	L32	1	1	0.99	65.209	-34.267
1876	E2F6	S907	M529	L273	1	1	0.93	23.121	79.986
1877	E4F1	S495	M385	L204	0.7	0.745	0.65	112.313	5.559
85403	EAF1	S177	M179	L56	1	1	0.805	36.811	8.633
124454	EARS2	S873	M32	L24	0.885	0.985	0.445	-74.977	54.343
1879	EBF1	S312	M279	L153	0.885	0.859	0.693	31.289	-45.541
10148	EBI3	S789	M11	L7	0.565	0.811	0.72	-32.097	20.181
10969	EBNA1BP2	S1010	M1	L3	0	0.381	0.98	-7.896	-69.669
11319	ECD	S1011	M671	L4	0.525	0.545	0.678	38.432	88.743
1632	ECI1	S121	M64	L1	1	0.93	0.5	8.216	-3.343
51295	ECSIT	S65	M9	L12	0.77	0.995	0.885	-93.546	24.621
1894	ECT2	S109	M69	L1	0.657	0.352	0.477	26.596	-4.329
128178	EDARADD	S654	M453	L135	1	1	0.355	-66.146	-71.947
23644	EDC4	S181	M101	L77	1	1	0.905	31.922	39.984
55741	EDEM2	S175	M18	L15	0.65	0.753	0.429	1.681	45.096
8721	EDF1	S330	M239	L1	1	0.925	0.337	6.735	33.348
10085	EDIL3	S393	M329	L4	0.995	0.52	0.985	12.352	103.114
1909	EDNRA	S238	M214	L54	0.735	0.475	0.482	-25.83	-34.719
8726	EED	S625	M38	L17	1	0.579	0.824	-32.879	49.091
1915	EEF1A1	S452	M349	L200	1	1	0.905	95.88	7.982
25895	EEF1AKMT3	S194	M123	L94	0.984	0.9	0.88	108.67	-21.466
1933	EEF1B2	S1	M4	L5	1	1	0.985	51.773	72.255
9521	EEF1E1	S143	M152	L47	1	1	0.55	80.48	-28.712
1937	EEF1G	S452	M349	L200	1	1	0.905	95.476	7.76
1938	EEF2	S295	M46	L1	0.81	0.531	0.335	-18.907	-16.378
196483	EEF2KMT	S1	M4	L5	1	1	0.985	49.264	80.239
60678	EEFSEC	S253	M210	L134	1	1	0.975	77.525	73.448
1943	EFNA2	S789	M11	L7	0.565	0.811	0.72	-32.256	20.56
1947	EFNB1	S63	M85	L64	0.937	0.984	0.555	-25.3	43.666
1949	EFNB3	S24	M33	L32	1	1	0.99	66.517	-34.717
23167	EFR3A	S227	M222	L91	1	0.995	0.4	17.091	44.478
9343	EFTUD2	S344	M78	L3	0.77	0.409	0.975	-10.82	-70.436
1956	EGFR	S100	M29	L9	1	0.991	0.362	15.858	31.544
54583	EGLN1	S596	M429	L160	1	0.945	0.35	37.948	-23.746
112398	EGLN2	S1012	M162	L121	0	0.625	0.675	21.955	-3.692
112399	EGLN3	S460	M304	L172	0.76	0.77	0.663	-47.526	-59.519
30845	EHD3	S26	M31	L21	0.99	0.995	0.94	29.966	-65.922
26298	EHF	S235	M227	L1	1	0.995	0.459	44.107	-34.424
79813	EHMT1	S866	M185	L72	0.995	0.99	0.985	-73.04	84.905
10919	EHMT2	S866	M185	L72	0.995	0.99	0.985	-72.977	84.906
10209	EIF1	S257	M126	L20	0.493	1	0.82	70.457	7.521
84285	EIF1AD	S1	M4	L5	1	1	0.985	49.579	70.267
83939	EIF2A	S1013	M3	L2	0	1	0.99	-75.549	-31.787
9451	EIF2AK3	S749	M35	L9	0.965	0.892	0.367	18.337	27.137
440275	EIF2AK4	S113	M134	L103	1	1	0.995	-35.281	70.351
1967	EIF2B1	S135	M13	L3	0.705	0.673	0.98	-17.311	-59.629
8892	EIF2B2	S396	M331	L3	0.98	0.785	0.868	-4.06	-56.711
8891	EIF2B3	S732	M418	L72	1	0.995	1	-46.926	57.121
8890	EIF2B4	S199	M205	L3	0.985	0.85	0.946	-5.56	-60.468
8893	EIF2B5	S199	M205	L3	0.985	0.85	0.946	-5.875	-60.23
1965	EIF2S1	S781	M654	L3	0.95	0.595	0.64	0.731	-57.063
8894	EIF2S2	S184	M175	L122	0.874	0.84	0.652	16.561	-43.734
1968	EIF2S3	S881	M5	L2	0.905	0.788	0.99	-64.322	-45.755
8661	EIF3A	S285	M252	L1	0.995	0.52	0.271	-16.44	-35.19
8662	EIF3B	S22	M14	L1	1	0.465	0.92	19.925	-28.008
8664	EIF3D	S132	M3	L2	0.885	1	0.99	-73.856	-33.41
3646	EIF3E	S300	M266	L155	0.972	0.98	0.86	12.708	-69.487
8665	EIF3F	S185	M1	L3	0.622	0.985	0.98	-2.723	-84.102
8666	EIF3G	S85	M118	L86	1	0.955	0.35	52.346	-26.458
8667	EIF3H	S300	M266	L155	0.965	0.9	0.78	14.18	-69.455
8668	EIF3I	S570	M505	L229	1	0.96	0.83	-19.176	105.083
8669	EIF3J	S618	M34	L3	0.46	0.47	0.98	-5.569	-72.427
51386	EIF3L	S51	M52	L33	0.909	0.973	0.733	-39.634	-32.353
10480	EIF3M	S6	M3	L2	0.86	1	0.99	-65.691	-26.351
1973	EIF4A1	S85	M118	L86	1	0.931	0.355	52.49	-29.031
1974	EIF4A2	S161	M174	L118	0.98	0.98	0.395	38.657	30.205
9775	EIF4A3	S326	M269	L92	1	1	0.94	11.271	-49.161
1975	EIF4B	S24	M33	L32	1	1	0.99	67.539	-31.345
1977	EIF4E	S85	M118	L86	1	0.931	0.355	52.528	-29.902
9470	EIF4E2	S761	M101	L77	0.51	1	0.975	52.07	96.742
317649	EIF4E3	S32	M3	L2	0.827	0.949	0.99	-79.42	-34.109
1981	EIF4G1	S85	M118	L86	1	0.931	0.355	52.518	-29.75
1982	EIF4G2	S503	M395	L55	1	0.99	0.905	-53.088	-3.976
8672	EIF4G3	S4	M8	L10	1	1	0.97	88.691	18.636
1983	EIF5	S92	M97	L5	1	0.99	0.982	39.883	68.359
1984	EIF5A	S336	M65	L53	0.95	0.961	0.656	-39.105	-47.899
143244	EIF5AL1	S336	M65	L53	0.95	0.961	0.656	-39.048	-47.935
9669	EIF5B	S75	M1	L3	0.79	0.985	0.98	-4.565	-96.475
3692	EIF6	S135	M13	L3	0.725	0.653	0.96	-22.628	-56.949
7260	EIPR1	S245	M202	L128	1	1	0.725	102.03	-58.867
60528	ELAC2	S281	M288	L150	1	1	0.925	58.507	-27.061
1994	ELAVL1	S765	M569	L298	0.975	0.78	0.745	108.247	-55.211
1998	ELF2	S243	M228	L1	0.569	0.457	0.355	-12.896	26.309
8178	ELL	S177	M179	L56	1	1	0.805	35.529	8.268
22936	ELL2	S549	M437	L110	1	0.995	0.827	-51.787	42.34
80237	ELL3	S68	M68	L43	1	1	0.97	-56.635	12.088
63916	ELMO2	S12	M6	L8	0.813	0.995	0.91	92.604	-12.066
6923	ELOB	S596	M429	L160	1	0.945	0.35	37.536	-23.549
6921	ELOC	S714	M523	L276	0.945	0.91	0.53	10.718	111.094
84337	ELOF1	S2	M5	L2	1	0.84	0.99	-69.266	-51.622
54898	ELOVL2	S133	M42	L31	1	1	0.83	45.625	-24.978
8518	ELP1	S327	M243	L105	1	0.995	0.77	30.5	98.489
55250	ELP2	S53	M73	L5	1	0.91	0.399	70.05	61.032
55140	ELP3	S53	M73	L5	1	0.91	0.399	69.919	61.016
26610	ELP4	S53	M73	L5	1	0.91	0.399	69.064	60.704
23587	ELP5	S53	M73	L5	1	0.91	0.399	68.059	61.462
54859	ELP6	S53	M73	L5	1	0.91	0.399	68.617	61.553
23065	EMC1	S219	M142	L101	1	1	0.995	41.882	112.629
9694	EMC2	S219	M142	L101	1	1	0.995	41.121	112.84
55831	EMC3	S219	M142	L101	1	1	0.995	41.344	112.367
51234	EMC4	S219	M142	L101	1	1	0.995	40.658	112.958
56851	EMC7	S219	M142	L101	1	1	0.995	41.156	112.122
129080	EMID1	S463	M351	L20	1	0.905	0.694	59.467	1.496
90187	EMILIN3	S2	M5	L2	0.738	0.83	0.99	-63.491	-55.386
27436	EML4	S943	M611	L7	0.71	0.655	0.267	-11.688	-9.904
400954	EML6	S534	M426	L238	0.995	0.995	0.99	-52.411	-64.114
56946	EMSY	S114	M135	L100	1	1	0.985	64.861	-66.512
2016	EMX1	S24	M33	L32	1	1	0.99	65.885	-32.368
2019	EN1	S95	M99	L83	1	1	0.915	23.471	-46.488
2021	ENDOG	S783	M599	L3	0.9	0.488	0.518	-15.651	-55.155
284131	ENDOV	S16	M12	L1	1	1	0.47	-13.747	11.246
2023	ENO1	S72	M89	L71	1	1	0.94	93.627	65.491
2028	ENPEP	S509	M488	L3	1	0.901	0.769	-19.342	-46.398
339221	ENPP7	S74	M47	L7	0.893	0.565	0.725	-35.738	6.911
2029	ENSA	S748	M614	L294	1	0.96	0.885	-43.582	72.745
56943	ENY2	S238	M214	L54	0.874	0.525	0.57	-33.186	-63.129
2033	EP300	S360	M55	L1	0.865	0.727	0.29	-17.796	34.08
57634	EP400	S37	M36	L34	0.975	0.98	0.523	-10.704	-8.318
64097	EPB41L4A	S184	M175	L122	1	0.955	0.715	18.755	-45.494
2038	EPB42	S71	M94	L2	0.725	0.97	0.844	-84.405	-11.526
80314	EPC1	S544	M448	L3	0.945	0.79	0.749	-26.482	-108.31
26122	EPC2	S544	M448	L3	0.92	0.769	0.774	-26.239	-106.863
284656	EPHA10	S636	M315	L198	1	1	0.93	77.795	-38.236
2046	EPHA8	S16	M12	L1	1	1	0.47	-12.01	12.538
2050	EPHB4	S233	M100	L84	1	0.585	0.915	31.74	-100.187
7957	EPM2A	S790	M39	L1	0.825	0.969	0.421	18.804	6.58
22905	EPN2	S137	M120	L1	1	0.615	0.359	-0.274	20.332
2058	EPRS	S274	M244	L152	1	1	0.525	65.436	15.927
2060	EPS15	S380	M296	L60	1	0.995	0.382	-4.878	60.679
54869	EPS8L1	S14	M1	L3	0.66	1	0.98	-6.172	-89.435
94240	EPSTI1	S141	M151	L60	0.428	0.608	0.275	-3.505	55.582
26284	ERAL1	S8	M7	L6	0.995	1	0.93	-78.033	43.526
2064	ERBB2	S330	M239	L1	1	0.925	0.337	5.977	32.92
2065	ERBB3	S330	M239	L1	1	0.925	0.337	6.095	33.173
2067	ERCC1	S763	M61	L48	1	0.913	0.815	73.181	-7.665
2068	ERCC2	S177	M179	L56	1	1	0.805	34.956	7.887
2071	ERCC3	S45	M63	L1	0.985	0.99	0.824	46.036	4.755
2072	ERCC4	S59	M61	L48	1	0.995	0.85	73.329	22.845
2073	ERCC5	S577	M268	L169	0.735	0.96	0.872	11.229	-57.369
54821	ERCC6L	S387	M156	L113	1	1	0.89	37.76	42.195
2079	ERH	S396	M331	L3	0.98	0.785	0.868	-4.026	-56.842
114625	ERMAP	S11	M10	L1	1	1	0.92	27.551	-17.494
79956	ERMP1	S303	M284	L2	1	0.995	0.868	-60.149	-48.535
10595	ERN2	S513	M12	L1	0.98	0.552	0.467	-13.578	21.62
23071	ERP44	S519	M56	L42	0.705	1	0.747	11.338	65.262
405754	ERVFRD-1	S24	M33	L32	1	1	0.99	65.99	-34.325
30816	ERVW-1	S93	M2	L4	0.995	0.475	0.995	23.719	91.489
157570	ESCO2	S350	M278	L164	1	1	0.93	53.146	26.994
51575	ESF1	S110	M129	L57	0.97	0.945	0.425	-24.502	36.95
9700	ESPL1	S3	M2	L4	0.691	0.995	1	-0.904	91.62
83715	ESPN	S576	M495	L214	0.985	0.985	0.76	72.824	52.703
2099	ESR1	S177	M179	L56	0.995	0.995	0.8	37.422	7.589
2101	ESRRA	S524	M248	L112	1	0.96	0.62	22.47	36.507
2104	ESRRG	S1014	M672	L38	0.615	0.643	0.26	-20.114	-2.023
2107	ETF1	S820	M183	L115	0.95	0.963	0.798	-58.956	-17.534
2108	ETFA	S180	M17	L6	0.95	0.953	0.365	-88.329	9.046
2109	ETFB	S441	M6	L8	0.96	0.925	0.9	84.262	-4.385
2117	ETV3	S56	M22	L3	0.519	0.411	0.98	-15.855	-79.913
2120	ETV6	S285	M252	L1	0.995	0.52	0.271	-16.855	-35.794
2130	EWSR1	S140	M106	L1	0.99	0.827	0.795	6.692	-18.036
55763	EXOC1	S114	M135	L100	0.885	0.93	0.915	67.283	-64.12
55770	EXOC2	S10	M15	L7	0.989	0.705	0.725	-46.652	25.192
60412	EXOC4	S1	M4	L5	0.66	1	0.985	52.721	66.736
10640	EXOC5	S431	M336	L203	0.995	0.975	0.965	-54.177	-47.973
23265	EXOC7	S1	M4	L5	0.853	0.995	0.985	45.769	69.158
149371	EXOC8	S890	M248	L112	0.68	0.815	0.618	20.883	38.606
51013	EXOSC1	S40	M34	L3	0.889	0.435	0.937	-3.439	-69.582
5394	EXOSC10	S816	M604	L4	0.985	0.455	0.889	17.988	77.055
23404	EXOSC2	S3	M2	L4	0.775	1	1	-5.711	97.545
51010	EXOSC3	S196	M198	L2	1	0.83	0.978	-104.192	-24.418
54512	EXOSC4	S52	M2	L4	0.86	0.995	1	7.318	88.019
56915	EXOSC5	S170	M78	L3	1	0.815	0.96	-32.773	-74.59
118460	EXOSC6	S1	M4	L5	1	1	0.985	49.632	69.678
23016	EXOSC7	S541	M156	L113	0.95	0.92	0.714	35.805	44.993
11340	EXOSC8	S541	M156	L113	0.95	0.92	0.714	36.223	44.47
5393	EXOSC9	S455	M50	L3	0.975	0.472	0.961	0.287	-79.729
2131	EXT1	S152	M21	L23	0.705	1	0.875	27.877	30.001
2132	EXT2	S152	M21	L23	0.705	1	0.875	27.669	29.876
2146	EZH2	S625	M38	L17	1	0.579	0.824	-32.735	49.113
50848	F11R	S428	M150	L1	1	0.975	0.341	-12.136	-1.523
2147	F2	S525	M412	L3	1	0.985	0.721	-48.361	-89.321
8263	F8A1	S131	M4	L5	0.45	1	0.985	52.097	64.05
91442	FAAP24	S59	M61	L48	1	0.995	0.85	70.022	25.476
646486	FABP12	S548	M8	L10	0.78	0.966	0.97	90.065	12.594
2171	FABP5	S508	M431	L8	0.775	0.64	0.605	73.867	-23.915
8772	FADD	S157	M144	L26	1	0.585	0.42	35.575	17.833
9415	FADS2	S93	M2	L4	0.995	0.475	0.995	22.786	90.832
23197	FAF2	S60	M83	L66	1	1	0.91	19.198	50.813
51011	FAHD2A	S3	M2	L4	0.865	1	1	6.688	97.75
90736	FAM104B	S1	M4	L5	0.485	0.545	0.9	47.428	74.384
79927	FAM110D	S853	M629	L311	0.98	0.965	0.595	56.864	86.121
23196	FAM120A	S838	M11	L7	0.905	0.975	0.725	-35.588	9.471
84668	FAM126A	S27	M3	L2	0.933	0.844	0.99	-89.347	-37.881
257415	FAM133B	S15	M4	L5	0.73	1	0.985	52.562	61.892
84908	FAM136A	S727	M644	L262	1	0.995	0.98	-78.29	4.883
145483	FAM161B	S678	M3	L2	0.925	0.801	0.938	-78.613	-39.167
26355	FAM162A	S27	M3	L2	0.995	0.835	0.99	-87.621	-40.759
284069	FAM171A2	S2	M5	L2	0.815	0.84	0.99	-73.347	-59.279
165215	FAM171B	S269	M223	L3	1	0.995	0.929	-27.938	-64.462
134145	ATPSCKMT	S4	M8	L10	1	1	0.97	91.124	19.645
51252	FAM178B	S321	M115	L2	1	0.855	0.99	-84.295	-60.354
389558	FAM180A	S2	M5	L2	0.985	0.84	0.99	-71.412	-55.046
84070	FAM186B	S237	M14	L1	0.975	0.374	0.92	13.435	-16.428
51313	GASK1B	S25	M24	L2	0.83	0.595	0.99	-95.228	-20.869
221786	FAM200A	S646	M8	L10	0.8	1	0.97	91.813	23.209
285550	FAM200B	S965	M5	L2	0.75	0.766	0.985	-70.207	-64.752
54942	ABITRAM	S361	M299	L2	0.965	0.715	0.991	-93.932	-53.664
85395	FAM207A	S612	M497	L3	0.82	0.76	0.957	-8.799	-102.522
9917	FAM20B	S152	M21	L23	0.705	1	0.875	25.857	30.187
125228	FAM210A	S1	M4	L5	0.575	1	0.985	53.489	69.519
29902	FAM216A	S123	M22	L3	0.809	0.77	0.949	-28.111	-80.242
26017	FAM32A	S1015	M126	L20	0.4	0.875	0.82	69.787	5.929
131177	FAM3D	S2	M5	L2	0.53	0.785	0.99	-70.202	-58.152
9130	FAM50A	S485	M476	L5	0.433	0.49	0.69	-28.354	81.824
388650	DIPK1A	S640	M491	L226	1	1	0.985	85.596	65.8
286077	FAM83H	S670	M392	L41	1	0.965	0.337	46.45	29.303
375061	FAM89A	S84	M30	L2	0.845	0.615	0.99	-86.461	-25.422
2175	FANCA	S59	M61	L48	1	0.995	0.85	71.953	25.166
2177	FANCD2	S59	M61	L48	1	0.995	0.85	72.705	24.265
2188	FANCF	S59	M61	L48	1	0.995	0.85	70.835	25.255
2189	FANCG	S59	M61	L48	1	0.995	0.85	72.591	25.456
55215	FANCI	S59	M61	L48	1	0.995	0.85	72.723	24.822
55120	FANCL	S59	M61	L48	1	0.995	0.85	71.921	23.986
57697	FANCM	S59	M61	L48	1	0.995	0.85	70.435	25.32
10667	FARS2	S29	M7	L6	0.869	0.99	0.93	-79.254	47.937
2193	FARSA	S3	M2	L4	0.979	1	1	1.278	99.096
10056	FARSB	S3	M2	L4	0.598	1	1	6.53	92.02
356	FASLG	S133	M42	L31	1	1	0.83	45.644	-24.448
2194	FASN	S390	M328	L196	1	1	0.995	-37.897	105.008
60493	FASTKD5	S23	M9	L12	0.979	1	0.885	-91.823	31.606
2197	FAU	S128	M72	L1	0.809	0.54	0.558	31.274	-35.823
2091	FBL	S61	M5	L2	0.645	0.758	0.98	-80.602	-54.282
54751	FBLIM1	S576	M495	L214	1	1	0.76	72.785	53.889
2199	FBLN2	S711	M50	L3	0.835	0.463	0.962	-1.261	-78.031
57666	FBRSL1	S2	M5	L2	0.812	0.84	0.99	-66.472	-54.578
54850	FBXL12	S631	M469	L11	1	0.98	0.565	-33.189	62.476
80204	FBXO11	S36	M21	L23	1	1	0.875	26.354	23.239
23014	FBXO21	S88	M113	L20	1	0.51	0.87	66.958	2.263
26260	FBXO25	S176	M1	L3	0.935	0.75	0.98	-19.028	-79.381
114907	FBXO32	S104	M10	L1	0.638	0.994	0.92	22.041	-12.696
54455	FBXO42	S665	M458	L46	1	0.96	0.49	13.688	60.005
26271	FBXO5	S86	M112	L1	1	0.995	0.33	5.471	8.916
23291	FBXW11	S146	M81	L58	1	0.995	0.82	-55.543	32.17
6468	FBXW4	S382	M320	L185	0.918	0.917	0.864	13.207	-75.099
55294	FBXW7	S376	M312	L55	1	0.98	0.965	-53.436	-0.197
84261	FBXW9	S4	M8	L10	0.98	1	0.97	86.405	15.885
2209	FCGR1A	S76	M67	L41	1	0.984	0.891	28.741	83.544
23149	FCHO1	S549	M437	L110	1	0.995	0.827	-52.472	43.288
115548	FCHO2	S44	M48	L28	1	0.99	0.995	-24.141	72.902
115352	FCRL3	S487	M379	L3	0.575	0.579	0.855	-15.452	-85.043
2222	FDFT1	S55	M2	L4	0.535	0.89	1	3.672	83.805
2224	FDPS	S440	M305	L11	1	0.82	0.99	-36.589	95.258
2230	FDX1	S119	M108	L52	1	1	0.54	-52.262	82.004
112812	FDX2	S349	M282	L159	0.73	0.73	0.545	-54.308	-9.488
2232	FDXR	S610	M482	L116	0.99	0.76	0.5	12.956	53.8
2235	FECH	S23	M9	L12	0.979	1	0.885	-92.208	31.638
55527	FEM1A	S847	M577	L19	1	0.985	0.904	52.894	-63.169
56929	FEM1C	S701	M67	L41	0.54	0.92	0.852	48	24.156
2237	FEN1	S1016	M70	L44	0	0.99	0.655	-31.706	-31.662
55612	FERMT1	S236	M29	L9	1	1	0.362	14.954	39.27
10979	FERMT2	S12	M6	L8	0.825	0.995	0.91	90.985	-8.194
9637	FEZ2	S679	M510	L9	0.981	0.975	0.191	-20.565	-28.379
2864	FFAR1	S288	M66	L1	0.995	0.634	0.291	-49.036	65.356
2245	FGD1	S12	M6	L8	0.71	0.955	0.905	89.653	-3.887
89846	FGD3	S934	M622	L10	0.79	0.38	0.732	49.639	-13.487
152273	FGD5	S134	M15	L7	0.89	0.67	0.725	-44.65	15.155
55785	FGD6	S230	M12	L1	0.945	0.922	0.465	-19.337	15.04
2260	FGFR1	S36	M21	L23	1	1	0.875	29.781	26.779
11116	FGFR1OP	S594	M480	L250	1	1	0.995	17.433	132.402
26127	FGFR1OP2	S7	M6	L8	0.955	1	0.91	80.267	-18.902
2261	FGFR3	S436	M11	L7	0.915	0.821	0.72	-31.041	17.562
2264	FGFR4	S456	M75	L1	0.68	0.802	0.465	3.492	-1.002
84929	FIBCD1	S10	M15	L7	1	0.705	0.725	-43.984	20.856
9896	FIG4	S2	M5	L2	0.853	0.819	0.959	-81.622	-70.69
63979	FIGNL1	S105	M5	L2	0.973	0.443	0.86	-57.924	-68.815
81608	FIP1L1	S530	M119	L1	0.77	0.626	0.756	-11.762	-31.434
51024	FIS1	S81	M49	L9	1	0.89	0.455	0.558	30.996
60681	FKBP10	S826	M443	L221	0.925	0.895	0.591	14.342	-0.978
2280	FKBP1A	S311	M277	L15	0.955	0.655	0.54	7.183	44.461
2288	FKBP4	S97	M104	L7	1	0.905	0.485	-42.864	38.993
23770	FKBP8	S121	M64	L1	0.975	0.93	0.5	11.661	-4.489
201163	FLCN	S342	M232	L161	0.99	0.98	0.985	15.81	-117.906
2313	FLI1	S368	M341	L174	0.985	0.98	0.675	12.716	-84.552
2314	FLII	S416	M44	L9	0.97	0.628	0.44	5.58	16.097
10211	FLOT1	S600	M398	L2	1	0.735	0.952	-92.676	-46.211
2322	FLT3	S247	M190	L1	0.595	0.88	0.289	1.782	37.962
2324	FLT4	S626	M240	L146	0.965	0.945	0.75	-54.992	56.224
28982	FLVCR1	S724	M530	L261	1	1	0.96	-57.149	101.703
84256	FLYWCH1	S6	M3	L2	0.249	0.994	0.99	-67.818	-22.242
2326	FMO1	S74	M47	L7	0.893	0.565	0.725	-36.488	7.185
79672	FN3KRP	S662	M465	L224	1	1	0.995	-48.582	-41.48
23360	FNBP4	S693	M6	L8	0.545	0.99	0.91	88.111	-18.299
64778	FNDC3B	S855	M21	L23	0.695	1	0.875	24.815	24.497
163479	FNDC7	S27	M3	L2	0.995	0.835	0.99	-87.894	-43.943
2339	FNTA	S956	M6	L8	0.96	0.946	0.798	82.236	-7.518
2342	FNTB	S956	M6	L8	0.96	0.946	0.798	81.854	-7.309
54914	FOCAD	S62	M53	L3	0.995	0.89	0.975	-39.146	-87.286
2352	FOLR3	S155	M165	L4	0.985	0.835	0.67	21.169	104.988
2353	FOS	S21	M25	L1	1	0.6	0.465	-0.677	1.138
8061	FOSL1	S80	M110	L78	1	1	0.955	98.64	-31.488
2355	FOSL2	S940	M593	L316	1	0.925	0.68	77.737	17.006
3169	FOXA1	S376	M312	L55	0.78	0.78	0.77	-54.963	-0.04
3170	FOXA2	S151	M12	L1	0.935	0.944	0.47	-16.11	15.774
3171	FOXA3	S121	M64	L1	0.995	0.93	0.5	9.577	-2.851
2303	FOXC2	S16	M12	L1	1	1	0.47	-10.127	13.18
2298	FOXD4	S1	M4	L5	1	1	0.985	48.026	79.934
653427	FOXD4L5	S868	M142	L101	0.725	0.535	0.8	40.06	109.784
653404	FOXD4L6	S739	M546	L29	0.99	0.86	0.565	0.191	66.3
2304	FOXE1	S490	M383	L9	1	0.9	0.23	-19.468	0.686
55810	FOXJ2	S409	M39	L1	0.9	0.946	0.487	11.99	5.795
22887	FOXJ3	S134	M15	L7	0.89	0.67	0.725	-45.25	14.551
221937	FOXK1	S921	M625	L7	1	1	0.638	-28.4	6.447
3607	FOXK2	S34	M26	L22	0.994	0.965	0.24	-23.997	5.134
668	FOXL2	S139	M40	L1	1	0.935	0.452	25.161	2.507
2305	FOXM1	S124	M147	L95	1	1	0.97	70.014	-54.812
8456	FOXN1	S91	M38	L17	0.495	0.603	0.489	-22.446	50.501
1112	FOXN3	S335	M128	L99	1	1	0.695	-29.861	28.913
139628	FOXR2	S515	M407	L3	0.815	0.575	0.752	2.647	-82.488
55572	FOXRED1	S742	M9	L12	0.555	0.905	0.885	-102.513	32.901
2356	FPGS	S13	M9	L12	0.964	0.885	0.855	-101.844	29.457
2358	FPR2	S110	M129	L57	1	0.98	0.425	-26.203	38.68
10023	FRAT1	S608	M155	L3	0.86	0.928	0.818	-18.23	-51.063
23401	FRAT2	S120	M11	L7	0.73	0.71	0.72	-26.032	14.267
448831	FRG2	S862	M4	L5	0.71	1	0.985	55.676	69.884
100288801	FRG2C	S73	M95	L69	0.979	0.959	0.889	31.538	63.224
10818	FRS2	S36	M21	L23	1	1	0.875	29.715	26.845
84075	FSCB	S498	M389	L2	0.96	0.66	0.985	-95.205	-26.053
10468	FST	S539	M255	L1	0.95	0.365	0.899	13.169	-13.535
23105	FSTL4	S618	M34	L3	0.46	0.47	0.98	-6.719	-71.708
10841	FTCD	S56	M22	L3	0.62	0.588	0.98	-14.635	-74.241
2495	FTH1	S155	M165	L4	0.99	0.87	0.63	21.487	105.933
117246	FTSJ3	S11	M10	L1	1	1	0.92	31.976	-18.858
8880	FUBP1	S48	M44	L9	1	0.94	0.462	10.708	19.886
8939	FUBP3	S283	M249	L79	1	1	0.74	-38.942	-5.373
5045	FURIN	S116	M93	L27	1	1	0.76	24.632	57.792
2521	FUS	S26	M31	L21	0.917	0.97	0.955	25.691	-64.199
2523	FUT1	S9	M11	L7	0.945	1	0.725	-36.929	14.949
170384	FUT11	S163	M176	L90	0.97	0.874	0.425	-21.351	-39.726
2524	FUT2	S1017	M673	L19	0.425	0.425	0.54	-58.941	-36.072
2395	FXN	S471	M347	L186	1	1	0.877	6.951	70.891
2534	FYN	S109	M69	L1	0.984	0.414	0.452	29.442	-5.294
8321	FZD1	S961	M578	L2	0.92	0.735	0.341	-9.527	-53.694
11211	FZD10	S1018	M517	L1	0	0.276	0.268	1.774	18.7
7855	FZD5	S9	M11	L7	0.735	1	0.725	-32.461	16.242
51343	FZR1	S21	M25	L1	0.91	0.6	0.465	-1.163	3.9
50486	G0S2	S460	M304	L172	0.985	0.995	0.795	-47.137	-58.38
2539	G6PD	S374	M311	L197	0.99	0.925	0.825	84.169	72.678
2549	GAB1	S36	M21	L23	1	1	0.875	27.03	24.519
9846	GAB2	S1019	M8	L10	0.482	0.568	0.665	84.177	11.399
11337	GABARAP	S794	M18	L15	0.855	0.413	0.32	-4.138	53.491
2550	GABBR1	S627	M100	L84	1	0.995	0.915	33.849	-102.766
2553	GABPB1	S127	M40	L1	0.954	0.686	0.457	31.073	1.429
126626	GABPB2	S58	M2	L4	0.405	1	1	14.296	86.515
4616	GADD45B	S878	M648	L286	1	1	0.965	-59.318	4.16
2580	GAK	S111	M148	L38	1	1	0.825	62.284	-79.774
2582	GALE	S248	M200	L11	1	0.955	0.99	-31.037	92.046
2584	GALK1	S91	M38	L17	0.495	0.603	0.489	-21.955	50.545
2585	GALK2	S417	M352	L1	1	0.97	0.481	0.785	-23.365
57452	GALNT16	S171	M13	L3	0.975	0.49	0.98	-28.948	-70.809
85569	GALP	S1	M4	L5	0.985	1	0.985	55.252	77.493
2593	GAMT	S257	M126	L20	0.543	0.95	0.775	70.432	11.165
23193	GANAB	S413	M348	L184	0.995	0.95	0.615	92.596	82.203
2597	GAPDH	S72	M89	L71	1	1	0.94	94.727	65.394
54433	GAR1	S207	M3	L2	0.94	0.566	0.99	-88.901	-20.955
2617	GARS	S226	M221	L4	0.985	0.795	0.938	11.086	79.491
2618	GART	S17	M19	L11	1	0.525	1	-37.328	84.983
2619	GAS1	S19	M17	L6	0.625	0.975	0.36	-93.177	-0.311
246176	GAS2L2	S76	M67	L41	0.877	0.99	0.885	44.418	25
2623	GATA1	S374	M311	L197	0.875	0.81	0.745	82.689	73.793
2625	GATA3	S296	M251	L157	1	0.99	0.57	49.405	-35.278
2627	GATA6	S485	M476	L5	0.925	0.52	0.41	70.26	12.908
57798	GATAD1	S114	M135	L100	0.995	0.995	0.98	64.318	-67.137
54815	GATAD2A	S615	M500	L217	1	1	1	19.968	-101.061
57459	GATAD2B	S615	M500	L217	1	1	1	19.74	-101.152
8729	GBF1	S173	M76	L29	1	0.985	0.905	-8.459	69.608
2729	GCLC	S118	M54	L11	0.57	1	1	-37.646	82.222
10985	GCN1	S113	M134	L103	1	1	0.995	-35.836	70.072
145781	GCOM1	S681	M590	L287	1	1	0.955	-3.024	-51.064
2665	GDI2	S3	M2	L4	0.646	0.93	0.94	0.816	93.158
2668	GDNF	S51	M52	L33	0.599	0.96	0.667	-42.602	-31.736
8487	GEMIN2	S527	M414	L156	1	1	0.585	98.877	-7.913
50628	GEMIN4	S878	M648	L286	1	1	0.965	-59.319	4.158
25929	GEMIN5	S1020	M660	L1	0.322	0.835	0.268	-3.751	-44.488
79833	GEMIN6	S15	M4	L5	0.726	1	0.985	52.949	60.367
79760	GEMIN7	S212	M4	L5	0.9	0.92	0.985	59.848	54.013
2672	GFI1	S435	M371	L179	1	1	0.725	-21.299	19.217
8328	GFI1B	S10	M15	L7	1	0.705	0.725	-44.608	20.693
85476	GFM1	S8	M7	L6	0.995	1	0.93	-76.568	45.866
84340	GFM2	S8	M7	L6	0.995	1	0.93	-77.634	46.696
2673	GFPT1	S248	M200	L11	1	0.955	0.99	-32.443	91.937
23163	GGA3	S305	M263	L139	1	1	0.725	-51.993	-55.362
2677	GGCX	S151	M12	L1	0.635	0.958	0.47	-17.75	18.245
9453	GGPS1	S79	M1	L3	0.92	0.851	0.98	-11.609	-98.805
2678	GGT1	S907	M529	L273	1	1	0.93	23.081	80.012
91227	GGTLC2	S3	M2	L4	0.715	1	1	8.282	101.284
2689	GH2	S281	M288	L150	1	1	0.925	59.297	-28.906
2692	GHRHR	S54	M1	L3	0.74	0.974	0.98	-14.978	-86.876
26058	GIGYF2	S761	M101	L77	0.51	1	0.975	52.103	96.61
9837	GINS1	S178	M157	L14	1	0.885	0.53	62.192	34.55
51659	GINS2	S178	M157	L14	1	0.885	0.53	62.666	33.54
64785	GINS3	S47	M58	L18	1	1	0.985	44.499	-88.944
84296	GINS4	S178	M157	L14	1	0.885	0.53	62.596	33.698
10755	GIPC1	S909	M643	L296	1	0.995	0.785	-45.715	-46.23
2696	GIPR	S308	M124	L2	0.667	0.69	0.91	-78.558	-62.398
2700	GJA3	S102	M114	L74	1	0.995	0.96	38.252	-72.17
10052	GJC1	S796	M275	L166	0.995	0.723	0.635	-11.035	-35.543
89944	GLB1L2	S2	M5	L2	0.817	0.84	0.99	-66.525	-57.777
26035	GLCE	S152	M21	L23	0.705	1	0.875	28.7	28.82
2733	GLE1	S251	M42	L31	1	0.625	0.714	-5.373	-22.722
2735	GLI1	S289	M51	L25	1	0.99	0.49	-24.159	-6.457
2738	GLI4	S93	M2	L4	0.995	0.475	0.995	23.253	91.939
11010	GLIPR1	S229	M119	L1	0.955	0.87	0.569	8.916	-11.88
256710	GLIPR1L1	S825	M1	L3	0.591	0.959	0.98	-24.546	-96.03
144321	GLIPR1L2	S466	M3	L2	0.623	0.86	0.99	-82.611	-36.666
11146	GLMN	S771	M71	L4	0.97	0.658	0.94	18.068	79.559
9340	GLP2R	S474	M1	L3	0.855	0.753	0.98	-22.991	-82.122
10539	GLRX3	S488	M404	L5	0.91	0.77	0.668	66.237	73.742
2744	GLS	S119	M108	L52	1	1	0.54	-49.669	83.471
2752	GLUL	S592	M384	L228	1	0.995	0.605	34.742	-1.815
389396	GLYATL3	S2	M5	L2	0.762	0.84	0.99	-70.991	-60.058
84656	GLYR1	S34	M26	L22	1	0.97	0.24	-25.688	-0.147
10691	GMEB1	S1021	M674	L3	0.74	0	0.744	-9.46	-107.027
51053	GMNN	S86	M112	L1	1	0.995	0.33	4.059	7.64
8833	GMPS	S17	M19	L11	1	0.525	1	-39.533	88.107
2770	GNAI1	S554	M456	L237	1	1	0.89	30.752	8.088
2771	GNAI2	S36	M21	L23	1	1	0.875	26.994	25.854
2773	GNAI3	S775	M42	L31	0.765	0.73	0.754	42.694	-23.924
2776	GNAQ	S68	M68	L43	1	1	0.97	-58.195	13.401
2778	GNAS	S28	M18	L15	0.949	0.995	0.425	-0.914	43.398
2782	GNB1	S666	M461	L8	1	0.575	0.905	91.157	-17.204
54584	GNB1L	S436	M11	L7	0.915	0.821	0.72	-30.851	18.79
2783	GNB2	S823	M511	L8	1	0.877	0.844	96.51	-13.378
2784	GNB3	S644	M415	L227	1	0.97	0.575	116.606	-44.481
10020	GNE	S223	M220	L75	0.623	0.615	0.528	-46.946	-14.735
2787	GNG5	S710	M527	L1	0.985	0.58	0.266	-20.741	-24.04
29889	GNL2	S45	M63	L1	1	0.99	0.83	45.315	2.999
26354	GNL3	S98	M102	L1	1	0.64	0.84	42.682	-3.043
54552	GNL3L	S4	M8	L10	1	1	0.97	95.042	14.468
10578	GNLY	S151	M12	L1	0.935	0.944	0.47	-17.084	16.091
27232	GNMT	S50	M77	L16	0.972	0.97	0.547	60.017	-4.244
132789	GNPDA2	S57	M1	L3	0.98	0.69	0.98	-27.104	-85.75
64841	GNPNAT1	S248	M200	L11	1	0.955	0.99	-32.948	91.521
2797	GNRH2	S4	M8	L10	1	1	0.97	90.877	19.014
2798	GNRHR	S867	M69	L1	0.92	0.462	0.385	51.446	-18.912
342096	GOLGA6A	S1	M4	L5	0.79	1	0.985	48.31	78.125
55889	GOLGA6B	S39	M3	L2	0.93	0.965	0.99	-81.862	-24.348
653643	GOLGA6D	S6	M3	L2	1	1	0.99	-68.776	-29.266
55204	GOLPH3L	S205	M211	L2	0.99	0.97	0.979	-97.576	-12.921
54856	GON4L	S1	M4	L5	0.848	0.995	0.985	44.86	67.629
9570	GOSR2	S439	M2	L4	0.985	0.6	1	-8.619	102.473
2806	GOT2	S119	M108	L52	1	1	0.54	-51.99	83.749
8733	GPAA1	S444	M339	L70	1	0.86	0.854	78.561	7.584
57678	GPAM	S79	M1	L3	0.855	0.578	0.829	-11.561	-101.439
55094	GPATCH1	S188	M186	L9	0.555	0.855	0.42	-18.918	-9.397
151306	GPBAR1	S21	M25	L1	1	0.6	0.465	0.769	-0.897
2817	GPC1	S7	M6	L8	0.825	1	0.91	88.125	-13.211
2719	GPC3	S37	M36	L34	1	1	0.545	-3.189	-7.483
2821	GPI	S72	M89	L71	1	1	0.94	92.613	66.194
338328	GPIHBP1	S412	M337	L1	1	0.92	0.601	7.535	-39.796
27238	GPKOW	S1	M4	L5	0.96	1	0.985	51.439	69.015
11321	GPN1	S3	M2	L4	0.814	1	1	2.168	93.05
54707	GPN2	S1	M4	L5	1	1	0.985	51.821	71.095
51184	GPN3	S685	M117	L3	0.45	1	0.245	-4.548	-45.123
56927	GPR108	S2	M5	L2	0.985	0.84	0.99	-70.502	-50.682
64582	GPR135	S5	M1	L3	0.885	0.995	0.98	-22.411	-90.768
56834	GPR137	S158	M168	L111	1	1	0.905	-71.152	-70.596
134391	GPR151	S583	M471	L218	1	0.985	0.755	38.826	-28.347
387509	GPR153	S233	M100	L84	1	0.585	0.915	31.407	-100.372
80045	GPR157	S5	M1	L3	0.71	0.809	0.845	-16.763	-96.225
27239	GPR162	S10	M15	L7	1	0.705	0.725	-41.292	24.033
2840	GPR17	S140	M106	L1	0.99	0.827	0.795	6.018	-17.322
440435	GPR179	S632	M459	L209	0.995	0.97	0.53	19.65	23.856
11318	GPR182	S16	M12	L1	1	1	0.47	-12.46	10.835
2857	GPR34	S798	M655	L31	1	1	0.704	41.695	-19.835
11250	GPR45	S494	M483	L2	0.9	0.67	0.565	-53.377	-28.884
2830	GPR6	S74	M47	L7	0.87	0.589	0.641	-46.255	4.65
83873	GPR61	S442	M321	L67	0.492	0.469	0.429	69.455	-70.734
8111	GPR68	S102	M114	L74	0.747	0.682	0.676	42.291	-31.177
53831	GPR84	S4	M8	L10	0.88	0.88	0.86	83.102	19.149
222545	GPRC6A	S241	M82	L17	1	0.863	0.674	-39.788	54.39
2873	GPS1	S101	M16	L1	0.755	0.555	0.875	6.454	-34.436
2877	GPX2	S93	M2	L4	0.985	0.465	0.985	25.103	90.343
2879	GPX4	S253	M210	L134	1	1	0.975	76.839	73.436
493869	GPX8	S3	M2	L4	0.643	0.764	0.808	-1.261	103.376
9402	GRAP2	S553	M440	L249	1	1	0.845	-43.37	-114.816
160622	GRASP	S707	M524	L129	0.905	0.835	0.525	-87.58	-54.723
2885	GRB2	S36	M21	L23	1	1	0.875	28.124	24.214
2886	GRB7	S67	M35	L9	0.82	0.985	0.457	11.217	26.242
26585	GREM1	S5	M1	L3	1	1	0.98	-20.309	-93.519
79977	GRHL2	S236	M29	L9	0.76	1	0.368	12.922	36.657
9380	GRHPR	S507	M447	L11	1	0.67	0.812	-45.643	93.187
116443	GRIN3A	S652	M399	L245	1	0.99	0.685	-0.895	10.985
116444	GRIN3B	S4	M8	L10	1	1	0.97	84.247	18.52
156	GRK2	S67	M35	L9	0.82	0.985	0.457	10.9	26.092
157	GRK3	S109	M69	L1	0.975	0.414	0.452	28.056	-4.169
2868	GRK4	S548	M8	L10	0.78	0.966	0.97	90.549	12.869
2870	GRK6	S91	M38	L17	0.495	0.603	0.489	-21.211	51.309
131890	GRK7	S282	M47	L7	0.955	0.579	0.675	-33.875	6.218
2913	GRM3	S127	M40	L1	0.99	0.688	0.457	31.435	-0.903
2914	GRM4	S331	M19	L11	0.785	0.543	1	-39.223	92.141
80273	GRPEL1	S464	M293	L2	0.84	0.94	0.475	-82.387	-8.153
2926	GRSF1	S462	M206	L35	0.84	0.59	0.345	-78.557	24.108
83743	GRWD1	S1	M4	L5	0.99	1	0.985	53.831	73.734
79792	GSDMD	S46	M3	L2	0.919	0.956	0.99	-78.905	-18.617
2935	GSPT1	S11	M10	L1	0.97	0.97	0.89	33.063	-19.976
2947	GSTM3	S76	M67	L41	0.974	0.967	0.884	30.873	84.676
2948	GSTM4	S102	M114	L74	0.839	0.99	0.955	41.829	-70.496
2949	GSTM5	S453	M178	L1	0.326	0.365	0.905	9.938	-25.305
2954	GSTZ1	S554	M456	L237	1	1	0.89	30.475	8.575
170825	GSX2	S12	M6	L8	0.773	0.995	0.91	93.93	-2.961
2957	GTF2A1	S458	M363	L182	1	1	0.505	-10.681	48.937
11036	GTF2A1L	S64	M1	L3	0.925	0.528	0.98	-12.108	-76.782
2958	GTF2A2	S3	M2	L4	0.785	0.995	1	5.819	96.777
2959	GTF2B	S369	M306	L33	0.995	0.995	0.369	-33.723	-36.858
2960	GTF2E1	S145	M180	L108	0.595	0.735	0.385	17.208	0.845
2961	GTF2E2	S562	M449	L1	0.985	0.76	0.325	-32.656	-21.118
2962	GTF2F1	S562	M449	L1	0.985	0.76	0.325	-32.837	-21.123
2963	GTF2F2	S451	M185	L72	1	1	1	-68.62	84.526
2965	GTF2H1	S824	M609	L293	1	1	0.835	52.182	-97.217
2966	GTF2H2	S175	M18	L15	0.391	0.37	0.274	103.81	0.613
2967	GTF2H3	S824	M609	L293	1	1	0.835	52.181	-97.216
2968	GTF2H4	S274	M244	L152	1	1	0.525	65.143	14.736
404672	GTF2H5	S770	M159	L37	0.65	0.98	0.667	30.905	-86.829
2969	GTF2I	S21	M25	L1	0.995	0.6	0.465	-2.225	-2.73
2971	GTF3A	S177	M179	L56	1	1	0.805	36.147	10.005
2975	GTF3C1	S153	M161	L120	0.99	0.975	0.62	54.59	-6.661
2976	GTF3C2	S153	M161	L120	0.99	0.975	0.62	55.3	-6.708
9330	GTF3C3	S153	M161	L120	0.99	0.975	0.62	54.584	-6.542
9329	GTF3C4	S153	M161	L120	1	0.975	0.625	53.13	-7.006
9328	GTF3C5	S728	M534	L156	1	0.96	0.376	79.409	52.522
112495	GTF3C6	S728	M534	L156	1	0.96	0.376	79.407	52.521
9567	GTPBP1	S10	M15	L7	1	0.705	0.725	-44.451	21.644
85865	GTPBP10	S277	M7	L6	0.99	0.992	0.93	-90.026	42.595
23560	GTPBP4	S216	M146	L1	1	0.93	0.794	50.389	-2.354
29083	GTPBP8	S277	M7	L6	0.99	0.992	0.93	-88.737	41.554
51512	GTSE1	S111	M148	L38	1	1	0.825	61.847	-79.673
2980	GUCA2A	S9	M11	L7	0.995	1	0.725	-34.668	12.847
3000	GUCY2D	S208	M103	L85	1	1	0.885	110.965	-13.366
2987	GUK1	S558	M467	L15	0.96	0.325	0.332	-14.014	54.167
3001	GZMA	S895	M1	L3	0.805	0.911	0.97	0.608	-87.175
3002	GZMB	S11	M10	L1	0.97	1	0.92	32.306	-21.538
55766	H2AFJ	S3	M2	L4	0.767	1	1	-4.155	94.836
94239	H2AFV	S5	M1	L3	0.895	1	0.98	-21.368	-91.763
3014	H2AFX	S26	M31	L21	0.985	1	0.945	28.581	-70.206
3015	H2AFZ	S37	M36	L34	1	1	0.545	-6.579	-6.559
3020	H3F3A	S20	M20	L14	0.99	1	0.675	70.123	42.52
3021	H3F3B	S918	M553	L297	1	0.795	0.425	38.593	-34.501
23498	HAAO	S171	M13	L3	0.525	0.513	0.975	-26.82	-73.857
201562	HACD2	S2	M5	L2	0.985	0.84	0.99	-69.796	-53.522
3033	HADH	S926	M376	L3	0.925	0.904	0.405	-41.391	-69.181
3030	HADHA	S702	M520	L1	0.91	0.435	0.903	19.459	-25.317
3029	HAGH	S391	M229	L1	0.99	0.975	0.269	-26.31	-13.188
3034	HAL	S937	M69	L1	0.52	0.593	0.452	31	-6.214
57817	HAMP	S1	M4	L5	0.991	1	0.985	50.736	81.294
3035	HARS	S3	M2	L4	0.975	1	1	2.709	100.056
23438	HARS2	S8	M7	L6	0.995	1	0.93	-79.134	45.351
3037	HAS2	S139	M40	L1	1	0.935	0.452	26.578	2.785
115106	HAUS1	S316	M181	L114	1	1	0.935	101.11	32.265
55142	HAUS2	S46	M3	L2	0.935	0.956	0.99	-76.67	-17.101
79441	HAUS3	S46	M3	L2	0.935	0.956	0.99	-75.968	-16.191
54801	HAUS6	S46	M3	L2	0.935	0.955	0.985	-75.438	-15.253
10456	HAX1	S900	M62	L51	0.36	0.99	1	-57.977	68.754
10767	HBS1L	S818	M545	L283	1	1	0.995	84.393	-93.6
3052	HCCS	S23	M9	L12	0.995	1	0.885	-90.537	27.003
3054	HCFC1	S141	M151	L60	0.428	0.608	0.275	-4.247	55.508
610	HCN2	S37	M36	L34	0.975	0.98	0.523	-11.603	-7.051
3061	HCRTR1	S352	M274	L1	0.965	0.72	0.21	54.111	-19.985
3065	HDAC1	S636	M315	L198	1	1	0.93	77.008	-38.434
79885	HDAC11	S516	M150	L1	0.915	0.935	0.339	-8.786	-1.259
8841	HDAC3	S90	M86	L62	1	0.985	0.78	84.537	-47.967
9759	HDAC4	S159	M170	L109	0.975	0.615	0.663	81.8	-80.879
51564	HDAC7	S159	M170	L109	0.975	0.615	0.663	81.74	-80.727
55869	HDAC8	S83	M105	L80	1	1	1	-66.366	0.745
154150	HDGFL1	S652	M399	L245	1	0.99	0.685	-0.51	10.825
27440	HDHD5	S218	M70	L44	1	0.995	0.655	-32.444	-29.401
139324	HDX	S618	M34	L3	0.46	0.47	0.98	-5.442	-72.131
55127	HEATR1	S25	M24	L2	0.99	0.658	0.99	-92.1	-20.813
55027	HEATR3	S6	M3	L2	0.8	1	0.99	-76.349	-29.753
256957	HEATR9	S71	M94	L2	1	0.985	0.843	-85.45	-8.865
25831	HECTD1	S481	M127	L98	1	1	0.99	-67.917	17.833
79654	HECTD3	S237	M14	L1	0.975	0.374	0.92	12.623	-17.448
57520	HECW2	S37	M36	L34	1	1	0.545	-5.996	-6.073
9931	HELZ	S11	M10	L1	0.995	1	0.92	27.496	-15.689
8924	HERC2	S53	M73	L5	0.531	0.85	0.433	70.497	58.89
9709	HERPUD1	S41	M27	L16	1	1	0.605	61.279	-17.626
3280	HES1	S857	M632	L284	1	1	0.91	-71.037	28.323
390992	HES3	S478	M11	L7	0.625	1	0.725	-35.068	18.876
84667	HES7	S4	M8	L10	1	1	0.97	87.038	19.234
10614	HEXIM1	S799	M10	L1	0.59	0.988	0.915	20.768	-15.123
124790	HEXIM2	S197	M5	L2	0.675	0.82	0.99	-66.636	-60.419
23493	HEY2	S766	M12	L1	0.98	0.974	0.47	-14.037	8.283
9146	HGS	S44	M48	L28	1	1	0.985	-22.681	69.037
55662	HIF1AN	S252	M92	L30	0.985	0.96	0.51	65.665	-44.145
192286	HIGD2A	S646	M8	L10	0.8	1	0.97	91.306	22.527
51501	HIKESHI	S19	M17	L6	0.98	0.985	0.35	-88.718	0.077
25988	HINFP	S641	M2	L4	0.47	0.828	0.965	7.244	91.887
135114	HINT3	S239	M207	L131	1	1	0.885	5.067	-70.337
3092	HIP1	S137	M120	L1	1	0.615	0.359	-0.201	21.171
204851	HIPK1	S127	M40	L1	0.99	0.688	0.457	31.484	-0.887
10114	HIPK3	S162	M153	L1	0.919	0.93	0.544	48.248	-11.966
7290	HIRA	S411	M344	L194	1	1	0.845	-41.368	-15.624
3007	HIST1H1D	S118	M54	L11	1	1	1	-38.737	81.856
3008	HIST1H1E	S782	M580	L147	0.945	0.935	0.774	31.616	47.755
8335	HIST1H2AB	S3	M2	L4	0.691	0.995	1	-0.951	90.613
8334	HIST1H2AC	S309	M1	L3	0.53	0.96	0.98	-12.808	-86.541
3013	HIST1H2AD	S1022	M194	L7	0	0.64	0.715	-30.227	22.67
3012	HIST1H2AE	S439	M2	L4	0.985	0.6	1	-8.649	101.8
8329	HIST1H2AI	S892	M96	L4	0.95	0.648	0.931	5.532	90.546
8331	HIST1H2AJ	S3	M2	L4	0.894	1	1	4.798	93.583
3018	HIST1H2BB	S364	M302	L170	1	0.995	0.98	136.138	-1.037
8347	HIST1H2BC	S1023	M675	L119	0.525	0.565	0.452	3.439	-61.044
3017	HIST1H2BD	S505	M396	L147	0.92	0.77	0.485	38.071	36.782
8344	HIST1H2BE	S92	M97	L5	1	0.995	0.98	38.026	68.315
8343	HIST1H2BF	S364	M302	L170	1	0.995	0.98	136.025	-1.145
8345	HIST1H2BH	S43	M59	L50	1	1	0.99	100.433	46.587
8346	HIST1H2BI	S92	M97	L5	1	0.995	0.98	36.827	68.55
8970	HIST1H2BJ	S364	M302	L170	1	0.995	0.98	136.533	-0.553
8340	HIST1H2BL	S364	M302	L170	1	0.995	0.98	136.624	0.67
8342	HIST1H2BM	S52	M2	L4	0.735	0.985	0.995	11.638	88.147
8341	HIST1H2BN	S92	M97	L5	1	0.995	0.98	37.58	68.318
8348	HIST1H2BO	S230	M12	L1	0.945	0.929	0.47	-18.341	13.917
8350	HIST1H3A	S358	M298	L175	0.955	0.795	0.513	1.439	-62.801
8352	HIST1H3C	S214	M215	L20	0.89	0.855	0.725	64.205	8.742
8354	HIST1H3I	S861	M633	L105	0.955	0.52	0.704	26.748	98.914
8366	HIST1H4B	S2	M5	L2	0.642	0.839	0.99	-72.45	-61.966
8364	HIST1H4C	S31	M13	L3	0.682	0.523	0.749	-24.028	-67.546
8338	HIST2H2AC	S892	M96	L4	0.95	0.648	0.931	5.708	90.885
8349	HIST2H2BE	S470	M62	L51	1	0.967	0.955	-54.109	67.352
440689	HIST2H2BF	S144	M96	L4	0.995	0.741	0.995	20.774	97.765
653604	HIST2H3D	S144	M96	L4	0.995	0.741	0.995	20.877	98.222
55355	HJURP	S53	M73	L5	0.587	0.475	0.84	66.045	61.279
148738	HJV	S470	M62	L51	0.95	0.981	0.99	-55.889	67.795
3099	HK2	S519	M56	L42	0.705	1	0.747	11.263	65.29
3107	HLA-C	S787	M587	L8	1	0.98	0.613	71.165	-21.092
3134	HLA-F	S483	M325	L190	0.67	0.625	0.605	-58.781	-48.459
3131	HLF	S952	M514	L7	0.955	0.649	0.231	-24.006	7.609
81502	HM13	S220	M218	L67	1	1	0.99	75.363	-74.812
3145	HMBS	S733	M2	L4	0.505	0.909	0.865	-1.627	111.514
3159	HMGA1	S232	M196	L25	0.72	0.61	0.238	-22.533	29.511
8091	HMGA2	S103	M87	L1	0.995	0.766	0.744	53.72	2.546
3146	HMGB1	S28	M18	L15	0.914	0.96	0.395	-3.898	44.119
3156	HMGCR	S738	M653	L270	0.97	0.925	0.79	-20.591	96.766
3157	HMGCS1	S738	M653	L270	0.97	0.925	0.79	-20.466	96.793
3151	HMGN2	S1024	M315	L198	0	0.685	0.64	79.117	-40.05
22993	HMGXB3	S305	M263	L139	0.806	0.67	0.508	-53.906	-54.354
340784	HMX3	S11	M10	L1	0.916	0.995	0.92	27.065	-18.783
6927	HNF1A	S793	M27	L16	0.925	0.721	0.6	63.372	-18.571
6928	HNF1B	S202	M208	L70	1	1	0.87	79.099	2.597
3172	HNF4A	S485	M476	L5	0.925	0.52	0.41	70.261	12.68
10949	HNRNPA0	S9	M11	L7	0.966	0.873	0.555	-30.247	15.249
3178	HNRNPA1	S841	M555	L87	1	0.715	0.827	92.974	-44.535
3181	HNRNPA2B1	S183	M171	L87	0.845	0.97	0.89	95.625	-44.023
220988	HNRNPA3	S841	M555	L87	1	0.715	0.827	93.008	-44.529
3183	HNRNPC	S168	M28	L13	0.994	0.554	0.95	47.36	-40.156
343069	HNRNPCL1	S50	M77	L16	1	0.97	0.547	62.408	-6.211
3184	HNRNPD	S48	M44	L9	0.985	0.94	0.462	6.577	18.726
9987	HNRNPDL	S223	M220	L75	1	0.995	0.8	-50.026	-15.115
3185	HNRNPF	S974	M613	L6	1	0.98	0.313	-97.085	-1.198
3187	HNRNPH1	S623	M466	L5	0.98	0.95	0.702	72.894	72.035
3190	HNRNPK	S135	M13	L3	0.738	0.638	0.98	-17.492	-57.447
3191	HNRNPL	S170	M78	L3	0.995	0.825	0.966	-32.477	-75.807
4670	HNRNPM	S48	M44	L9	1	0.94	0.462	9.182	20.411
10236	HNRNPR	S611	M2	L4	0.416	0.471	0.929	-9.175	81.718
3192	HNRNPU	S12	M6	L8	0.815	0.995	0.91	90.825	-13.059
221092	HNRNPUL2	S4	M8	L10	1	1	0.97	84.388	20.032
9454	HOMER3	S163	M176	L90	0.986	0.899	0.43	-19.928	-37.472
57594	HOMEZ	S79	M1	L3	0.93	0.845	0.98	-9.778	-98.144
150280	HORMAD2	S286	M224	L2	0.98	0.81	0.86	-86.099	-49.354
3207	HOXA11	S139	M40	L1	1	0.935	0.452	24.811	-0.26
3209	HOXA13	S111	M148	L38	0.975	0.985	0.82	63.227	-81.345
3200	HOXA3	S556	M169	L8	1	0.663	0.51	62.994	-24.368
3203	HOXA6	S236	M29	L9	0.76	1	0.368	12.505	36.643
3213	HOXB3	S477	M55	L1	0.92	0.392	0.296	-7.055	36.975
3216	HOXB6	S554	M456	L237	1	1	0.89	30.885	7.897
3217	HOXB7	S16	M12	L1	0.982	0.99	0.46	-7.381	14.548
3218	HOXB8	S16	M12	L1	1	1	0.47	-10.051	10.813
3226	HOXC10	S877	M541	L130	0.67	0.6	0.395	-69.466	-4.194
3227	HOXC11	S41	M27	L16	1	1	0.605	61.671	-14.169
3229	HOXC13	S179	M173	L117	1	1	0.985	-44.898	-10.432
3223	HOXC6	S68	M68	L43	1	1	0.97	-57.981	11.895
3236	HOXD10	S359	M292	L130	0.873	0.885	0.475	-43.456	-71.482
3237	HOXD11	S642	M401	L216	0.895	0.59	0.455	42.589	9.569
3235	HOXD9	S120	M11	L7	0.5	0.695	0.72	-24.814	9.653
51440	HPCAL4	S255	M162	L121	1	1	0.96	24.876	46.544
3242	HPD	S24	M33	L32	1	1	0.99	67.589	-31.128
3257	HPS1	S54	M1	L3	0.739	0.974	0.98	-18.421	-88.485
11234	HPS5	S9	M11	L7	0.97	1	0.725	-32.095	10.075
10855	HPSE	S22	M14	L1	0.938	0.46	0.92	17.704	-27.817
3265	HRAS	S128	M72	L1	0.964	0.555	0.534	30.177	-39.586
11255	HRH3	S137	M120	L1	1	0.61	0.364	0.632	21.172
9653	HS2ST1	S36	M21	L23	1	1	0.875	30.799	27.5
9951	HS3ST4	S311	M277	L15	0.95	0.66	0.545	5.314	44.473
9394	HS6ST1	S315	M2	L4	0.685	0.899	1	10.593	97.453
3281	HSBP1	S947	M600	L47	1	0.995	0.545	86.36	-28.022
440498	HSBP1L1	S2	M5	L2	0.96	0.84	0.99	-73.833	-51.175
150274	HSCB	S471	M347	L186	1	1	0.877	7.049	70.9
3290	HSD11B1	S489	M381	L19	1	0.74	0.51	44.076	-60.141
374875	HSD11B1L	S74	M47	L7	0.795	0.546	0.715	-38.704	6.199
3291	HSD11B2	S216	M146	L1	0.985	0.92	0.784	51.233	-2.235
3028	HSD17B10	S234	M199	L6	0.639	0.518	0.776	-70.348	44.7
51144	HSD17B12	S134	M15	L7	0.812	0.695	0.725	-46.06	17.62
51171	HSD17B14	S214	M215	L20	1	0.96	0.825	64.176	6.52
3295	HSD17B4	S43	M59	L50	1	1	0.99	104.238	46.145
80270	HSD3B7	S64	M1	L3	0.75	0.528	0.98	-12.852	-78.48
3297	HSF1	S905	M87	L1	0.985	0.788	0.809	50.856	5.411
3320	HSP90AA1	S34	M26	L22	0.994	0.965	0.24	-22.27	4.744
3326	HSP90AB1	S318	M57	L13	0.785	0.799	0.827	42.612	-47.068
7184	HSP90B1	S99	M109	L27	1	0.945	0.535	28.993	56.884
6782	HSPA13	S130	M143	L5	1	0.91	0.947	45.336	58.376
51182	HSPA14	S103	M87	L1	1	0.75	0.824	52.164	1.875
3303	HSPA1A	S9	M11	L7	0.995	1	0.725	-34.853	15.708
3304	HSPA1B	S838	M11	L7	0.905	0.975	0.725	-35.422	9.542
3309	HSPA5	S1	M4	L5	0.98	1	0.985	51.525	79.658
3312	HSPA8	S732	M418	L72	1	0.995	1	-46.926	57.123
3313	HSPA9	S135	M13	L3	0.738	0.638	0.98	-18.003	-57.662
3329	HSPD1	S87	M111	L76	1	1	0.895	-61.127	54.816
3336	HSPE1	S87	M111	L76	1	1	0.895	-61.55	56.077
27336	HTATSF1	S628	M76	L29	1	0.988	0.905	-7.568	66.207
27429	HTRA2	S564	M62	L51	0.97	0.933	0.942	-59.566	70.451
3064	HTT	S455	M50	L3	0.975	0.472	0.961	-0.594	-80.443
3364	HUS1	S26	M31	L21	0.995	1	0.945	30.272	-67.789
10075	HUWE1	S63	M85	L64	0.872	0.993	0.518	-10.081	59.706
8692	HYAL2	S36	M21	L23	0.985	0.985	0.86	29.421	23.243
10525	HYOU1	S215	M2	L4	0.78	0.899	1	10.859	92.989
285148	IAH1	S2	M5	L2	0.985	0.84	0.99	-68.244	-54.092
3376	IARS	S5	M1	L3	0.724	1	0.98	-16.695	-92.929
55699	IARS2	S87	M111	L76	1	1	0.895	-61.68	56.33
200205	IBA57	S520	M9	L12	0.95	0.91	0.885	-94.031	37.762
3386	ICAM4	S883	M537	L3	0.835	0.503	0.429	-54.305	-71.388
79664	ICE2	S177	M179	L56	1	1	0.805	36.57	8.613
23463	ICMT	S583	M471	L218	1	0.985	0.755	38.447	-28.975
3400	ID4	S1025	M676	L126	0	0	0.322	-8.635	98.884
3419	IDH3A	S906	M367	L171	1	0.995	0.563	-45.082	87.575
8870	IER3	S67	M35	L9	0.82	0.985	0.457	10.119	26.728
51124	IER3IP1	S240	M201	L127	1	0.989	0.71	-63.04	-9.5
3428	IFI16	S5	M1	L3	0.724	1	0.98	-16.156	-94.487
10437	IFI30	S31	M13	L3	0.859	0.705	0.975	-22.665	-68.106
10581	IFITM2	S1	M4	L5	0.985	1	0.985	51.836	78.047
10410	IFITM3	S614	M4	L5	0.515	0.994	0.98	60.855	77.683
3447	IFNA13	S352	M274	L1	0.96	0.715	0.21	55.516	-20.919
3442	IFNA5	S176	M1	L3	0.895	0.748	0.98	-22.559	-78.404
163702	IFNLR1	S352	M274	L1	0.965	0.72	0.21	54.411	-20.894
9742	IFT140	S279	M16	L1	0.965	0.621	0.92	18.156	-15.653
3476	IGBP1	S173	M76	L29	0.965	0.985	0.92	-6.712	70.183
3480	IGF1R	S116	M93	L27	1	1	0.76	25.614	57.565
3481	IGF2	S231	M50	L3	0.93	0.854	0.873	3.242	-75.914
10642	IGF2BP1	S41	M27	L16	0.935	1	0.605	60.494	-13.502
10644	IGF2BP2	S7	M6	L8	0.905	1	0.91	82.121	-19.27
10643	IGF2BP3	S451	M185	L72	1	1	1	-68.783	85.559
3483	IGFALS	S4	M8	L10	1	1	0.97	86.881	20.571
3490	IGFBP7	S647	M433	L211	1	1	0.795	-55.753	85.619
347252	IGFBPL1	S27	M3	L2	0.933	0.844	0.99	-88.877	-37.132
374918	IGFL1	S61	M5	L2	0.645	0.758	0.98	-79.544	-54.699
79713	IGFLR1	S61	M5	L2	0.645	0.758	0.98	-79.242	-55.448
3543	IGLL1	S430	M364	L3	0.995	0.955	0.522	-36.326	-96.895
285313	IGSF10	S32	M3	L2	0.83	0.96	0.99	-83.641	-31.474
3321	IGSF3	S20	M20	L14	0.685	1	0.675	69.473	45.004
3549	IHH	S21	M25	L1	0.91	0.6	0.465	-1.903	5.196
3550	IK	S341	M64	L1	0.89	0.899	0.505	9.08	-5.511
3551	IKBKB	S195	M197	L26	1	1	0.425	35.237	21.449
8517	IKBKG	S186	M187	L26	0.995	0.925	0.39	31.028	17.515
22806	IKZF3	S220	M218	L67	1	1	0.99	75.245	-72.785
3596	IL13	S578	M1	L3	0.91	0.789	0.98	-28.201	-99.868
3552	IL1A	S736	M80	L35	0.915	0.862	0.382	-84.593	20.478
84639	IL1F10	S5	M1	L3	1	1	0.98	-23.775	-92.61
8808	IL1RL2	S242	M191	L54	1	0.975	0.6	-36.108	-61.124
50616	IL22	S639	M346	L2	0.832	0.702	0.883	-62.903	-66.564
11009	IL24	S265	M242	L138	0.98	0.975	0.475	-49.854	-4.146
146433	IL34	S122	M3	L2	0.75	0.834	0.99	-81.451	-43.56
3570	IL6R	S968	M76	L29	0.735	0.98	0.92	-4.144	72.501
3608	ILF2	S902	M607	L274	1	0.99	0.67	47.017	-71.461
3609	ILF3	S902	M607	L274	1	0.99	0.67	47.024	-71.488
3611	ILK	S7	M6	L8	0.66	1	0.91	85.46	-18.731
10989	IMMT	S71	M94	L2	1	0.985	0.843	-85.94	-8.943
55272	IMP3	S671	M477	L5	0.935	0.93	0.884	45.857	63.28
92856	IMP4	S751	M80	L35	0.715	0.815	0.382	-7.009	-65.058
55364	IMPACT	S279	M16	L1	0.95	0.603	0.915	17.708	-14.169
3614	IMPDH1	S10	M15	L7	0.989	0.705	0.725	-47.947	24.417
3615	IMPDH2	S17	M19	L11	1	0.525	1	-39.444	86.71
3619	INCENP	S128	M72	L1	0.615	0.556	0.566	32.34	-33.926
3622	ING2	S378	M314	L178	1	1	0.935	-76.616	70.138
54556	ING3	S544	M448	L3	0.945	0.79	0.749	-26.454	-108.135
3623	INHA	S31	M13	L3	0.422	0.8	0.98	-20.329	-66.533
54617	INO80	S82	M90	L63	1	1	0.93	110.592	29.624
83444	INO80B	S82	M90	L63	1	1	0.93	110.815	28.005
283899	INO80E	S82	M90	L63	1	1	0.93	109.264	29.44
3632	INPP5A	S352	M274	L1	0.965	0.72	0.21	53.858	-21.866
56623	INPP5E	S543	M60	L1	0.49	0.985	0.327	-1.197	-30.988
3630	INS	S478	M11	L7	0.625	1	0.725	-36.002	17.943
3638	INSIG1	S2	M5	L2	0.965	0.84	0.99	-75.145	-51.016
55174	INTS10	S46	M3	L2	0.687	0.933	0.99	-78.694	-15.257
54973	INTS11	S445	M203	L45	0.83	0.728	0.552	-68.384	-15.739
57117	INTS12	S517	M139	L45	0.515	0.995	0.523	-38.69	-20.67
65123	INTS3	S315	M2	L4	0.685	0.899	1	11.597	98.159
92105	INTS4	S542	M20	L14	0.98	0.995	0.675	67.897	36.472
26512	INTS6	S3	M2	L4	0.256	0.955	1	12.383	94.314
25896	INTS7	S347	M139	L45	1	0.918	0.57	-68.166	-13.452
55656	INTS8	S803	M594	L5	0.98	0.74	0.947	43.52	77.34
55756	INTS9	S445	M203	L45	0.83	0.728	0.552	-68.474	-15.366
9807	IP6K1	S164	M158	L37	1	0.92	0.744	34.06	-59.858
51447	IP6K2	S365	M303	L8	1	0.905	0.805	76.862	-20.059
51194	IPO11	S205	M211	L2	1	0.97	0.972	-96.983	-10.983
9670	IPO13	S575	M460	L234	0.96	0.96	0.935	45.119	90.483
79711	IPO4	S522	M410	L225	1	1	0.895	-7.549	-38.106
3843	IPO5	S7	M6	L8	0.66	1	0.91	84.96	-19.429
[truncated: 3,095 more rows]

## Sheet: S40_C60
EntrezID	GeneSymbol	Cluster_Small	Cluster_Medium	Cluster_Large	Prob_Small	Prob_Medium	Prob_Large	tSNE_x	tSNE_y
8086	AAAS	S485	M398	L247	1	0.995	0.578	116.142	3.678
14	AAMP	S896	M540	L19	0.945	0.67	0.495	107.611	-50.86
16	AARS	S7	M5	L1	1	1	0.99	4.382	78.179
57505	AARS2	S2	M3	L4	0.935	1	0.98	-71.137	-61.281
60496	AASDHPPT	S240	M204	L89	0.969	0.93	0.562	-12.015	24.141
26574	AATF	S403	M308	L21	0.985	0.75	0.408	-30.197	49.094
23456	ABCB10	S492	M397	L1	1	0.57	0.799	0.803	93.244
22	ABCB7	S55	M34	L19	1	1	0.582	-13.286	3.805
23457	ABCB9	S366	M328	L105	0.915	0.57	0.537	33.515	15.384
8714	ABCC3	S740	M497	L1	1	0.94	0.536	7.687	21.229
215	ABCD1	S30	M45	L56	1	1	1	20.427	131.54
6059	ABCE1	S272	M9	L11	0.92	0.9	0.576	32.608	1.267
23	ABCF1	S258	M241	L165	1	0.995	0.814	-57.071	93.996
9619	ABCG1	S76	M25	L6	0.803	0.746	0.377	20.773	-5.438
83451	ABHD11	S356	M71	L1	0.92	0.571	0.959	19.855	71.674
26090	ABHD12	S455	M376	L2	0.698	0.76	0.474	-1.828	-62.814
84945	ABHD13	S897	M6	L5	0.48	0.54	0.598	72.489	11.719
116236	ABHD15	S29	M19	L14	1	1	0.843	42.364	-53.15
81926	ABHD17A	S194	M86	L9	1	0.935	0.59	-39.543	0.845
10006	ABI1	S191	M41	L51	0.505	0.995	0.742	55.497	46.347
29777	ABT1	S24	M9	L11	0.915	0.931	0.521	41.638	-0.659
31	ACACA	S175	M183	L156	1	1	1	41.251	-111.409
28976	ACAD9	S4	M7	L8	0.979	1	0.985	-73.149	-98.673
65057	ACD	S170	M169	L95	1	1	0.975	-17.926	105.31
43	ACHE	S185	M166	L146	0.91	0.905	0.564	48.024	-18.165
22985	ACIN1	S146	M11	L22	0.975	0.555	0.39	13.642	8.779
47	ACLY	S175	M183	L156	1	1	1	40.597	-110.269
50	ACO2	S710	M16	L7	0.79	0.613	0.705	9.282	-127.697
134526	ACOT12	S429	M455	L74	0.955	0.66	0.404	-1.908	13.598
10005	ACOT8	S210	M2	L3	0.93	0.495	0.825	9.894	-28.396
51	ACOX1	S30	M45	L56	1	1	1	21.389	133.968
49	ACR	S255	M159	L139	0.995	0.985	0.665	46.282	76.434
2181	ACSL3	S39	M56	L62	1	0.995	0.95	-77.922	66.844
2182	ACSL4	S217	M28	L7	0.89	0.87	0.503	21.427	-113.864
60	ACTB	S87	M59	L9	1	0.965	0.223	-41.026	9.914
71	ACTG1	S349	M59	L9	0.735	0.965	0.26	-39.009	9.535
72	ACTG2	S349	M59	L9	0.735	0.965	0.26	-39.266	9.569
86	ACTL6A	S92	M62	L23	0.975	0.97	0.728	57.813	-37.046
10881	ACTL7A	S498	M2	L3	0.393	0.784	0.724	8.065	-34.021
87	ACTN1	S230	M218	L174	1	1	0.955	-10.791	51.196
55860	ACTR10	S315	M274	L115	1	0.995	0.75	1.41	-58.364
10121	ACTR1A	S843	M54	L44	0.85	0.878	0.615	75.147	25.93
10120	ACTR1B	S373	M337	L1	0.945	0.645	0.985	4.552	66.848
10097	ACTR2	S70	M41	L51	1	0.995	0.747	57.75	50.058
10096	ACTR3	S70	M41	L51	1	0.995	0.747	58.71	49.471
79913	ACTR5	S295	M67	L73	0.975	0.995	1	72.768	115.978
64431	ACTR6	S92	M62	L23	1	0.995	0.75	60.388	-38.977
93973	ACTR8	S144	M67	L73	1	1	1	76.061	117.776
4185	ADAM11	S409	M310	L14	1	0.64	0.503	0.082	30.205
81794	ADAMTS10	S52	M18	L17	0.6	0.99	0.883	-85.3	23.431
11173	ADAMTS7	S367	M330	L187	1	0.995	0.879	99.345	-54.987
339366	ADAMTSL5	S464	M351	L36	0.985	0.362	0.328	35.563	16.32
11033	ADAP1	S126	M148	L9	1	0.94	0.419	-29.72	-5.914
103	ADAR	S172	M180	L142	0.995	0.99	0.985	85.946	-78.622
134637	ADAT2	S37	M23	L1	0.985	0.98	0.297	-18.649	27.366
113179	ADAT3	S37	M23	L1	0.985	0.98	0.297	-20.187	27.604
109	ADCY3	S271	M253	L39	0.933	0.891	0.612	-4.83	95.243
283383	ADGRD1	S898	M2	L3	0.685	0.522	0.778	-0.507	-38.582
139378	ADGRG4	S89	M2	L3	0.975	0.605	0.825	-10.381	-46.516
23394	ADNP	S222	M209	L167	0.995	0.995	0.975	-28.424	128.314
83440	ADPGK	S300	M259	L201	1	0.986	0.585	-68.724	98.942
11047	ADRM1	S56	M57	L38	1	1	0.879	73.896	6.44
158	ADSL	S43	M16	L7	1	1	1	7.928	-125.625
159	ADSS	S273	M255	L7	0.935	0.403	1	9.802	-119.696
165	AEBP1	S623	M466	L1	0.949	0.454	0.241	-5.46	5.477
4301	AFDN	S384	M6	L5	0.815	0.985	0.955	56.625	39.729
10939	AFG3L2	S899	M37	L35	0.45	0.56	0.823	-85.627	-81.394
116986	AGAP2	S121	M101	L15	1	0.855	0.695	-89.263	-41.829
729092	AGAP5	S322	M316	L197	1	1	0.954	110.931	-40.702
414189	AGAP6	S322	M316	L197	1	1	0.954	111.168	-41.62
26523	AGO1	S788	M98	L108	0.955	0.858	0.528	-65.429	3.98
27161	AGO2	S570	M429	L242	0.935	0.605	0.798	76.237	-11.514
10554	AGPAT1	S335	M35	L1	0.775	0.503	0.81	18.152	27.945
25909	AHCTF1	S129	M140	L75	1	0.99	0.821	59.923	-8.038
191	AHCY	S43	M16	L7	0.99	0.995	1	8.408	-125.868
10768	AHCYL1	S49	M76	L7	1	0.871	0.755	11.897	-107.344
79026	AHNAK	S74	M8	L10	0.83	0.949	0.945	-47.792	-40.285
196	AHR	S602	M431	L243	1	1	1	61.917	-93.14
9131	AIFM1	S44	M29	L24	0.985	0.974	0.833	-28.92	17.077
51390	AIG1	S605	M443	L164	1	1	0.94	100.587	-74.864
7965	AIMP2	S227	M12	L16	0.939	0.821	0.681	-20.824	12.309
9049	AIP	S602	M431	L243	1	1	1	61.652	-92.424
205	AK4	S372	M303	L75	0.955	0.775	0.624	65.096	-5.907
79647	AKIRIN1	S835	M607	L39	1	0.845	0.737	53.583	65.108
22977	AKR7A3	S33	M33	L34	1	1	0.965	-109.866	-27.724
207	AKT1	S238	M226	L77	1	1	0.785	-20.793	80.955
208	AKT2	S238	M226	L77	1	1	0.785	-22.666	80.992
210	ALAD	S130	M154	L135	1	1	1	-23.413	-128.755
211	ALAS1	S130	M154	L135	1	1	1	-23.141	-129.167
5832	ALDH18A1	S43	M16	L7	1	1	1	8.005	-124.55
226	ALDOA	S44	M29	L24	0.98	0.985	0.874	-31.553	19.596
230	ALDOC	S29	M19	L14	1	1	0.843	42.795	-55.508
56052	ALG1	S153	M5	L1	0.845	0.592	0.9	69.683	49.168
144245	ALG10B	S706	M512	L3	1	0.55	0.743	-16.153	-25.883
440138	ALG11	S3	M4	L1	0.964	1	0.983	20.786	55.08
79087	ALG12	S242	M228	L134	1	0.99	0.38	104.556	10.294
79868	ALG13	S84	M5	L1	0.96	0.545	0.99	13.683	74.339
200810	ALG1L	S7	M5	L1	0.711	1	0.99	-0.275	84.262
85365	ALG2	S38	M5	L1	0.482	0.939	0.99	15.894	82.6
29880	ALG5	S301	M260	L26	1	0.895	0.482	101.236	6.234
29929	ALG6	S301	M260	L26	1	0.895	0.482	100.884	7.062
79053	ALG8	S301	M260	L26	1	0.895	0.482	100.874	7.004
79796	ALG9	S242	M228	L134	1	0.99	0.38	104.266	9.539
54890	ALKBH5	S134	M99	L96	0.96	0.83	0.44	-36.05	76.365
59344	ALOXE3	S46	M15	L18	0.99	0.99	0.679	-54.533	-4.086
257	ALX3	S33	M33	L34	0.99	0.99	0.955	-108.71	-30.989
10189	ALYREF	S284	M131	L123	0.945	0.855	0.452	-14.53	-7.669
55626	AMBRA1	S169	M15	L18	1	0.973	0.685	-61.888	-1.877
262	AMD1	S43	M16	L7	1	1	1	5.658	-127.114
139285	AMER1	S900	M9	L11	0	0.945	0.568	35.933	-0.956
267	AMFR	S39	M56	L62	1	0.995	0.95	-82.244	66.81
9949	AMMECR1	S1	M1	L2	0.583	0.99	0.975	-13.689	-89.665
279	AMY2A	S492	M397	L1	0.995	0.565	0.798	1.587	94.374
64682	ANAPC1	S396	M9	L11	0.865	0.925	0.577	37.489	4.898
10393	ANAPC10	S197	M164	L93	1	0.955	0.558	-4.063	49.133
51529	ANAPC11	S211	M196	L6	0.99	0.353	0.343	6.943	-1.124
25906	ANAPC15	S444	M410	L44	1	0.975	0.415	74.581	18.947
29882	ANAPC2	S330	M5	L1	0.725	0.878	0.935	-0.666	73.495
29945	ANAPC4	S85	M122	L113	1	0.995	0.37	31.22	8.901
51433	ANAPC5	S85	M122	L113	1	0.995	0.37	31.279	9.671
283	ANG	S12	M2	L3	0.919	0.505	0.825	-3.608	-42.054
83854	ANGPTL6	S36	M50	L17	0.986	0.518	0.832	-77.342	16.895
56172	ANKH	S550	M158	L150	0.875	0.805	0.432	-21.916	-14.048
23141	ANKLE2	S408	M291	L3	1	0.915	0.798	4.632	-22.884
29123	ANKRD11	S62	M85	L69	1	0.985	0.915	90.014	-49.713
26057	ANKRD17	S361	M325	L215	0.99	0.99	0.556	69.295	0.068
118932	ANKRD22	S827	M626	L291	1	0.995	0.54	-12.922	-103.026
256006	ANKRD31	S724	M12	L16	0.66	0.989	0.806	-54.843	22.111
57730	ANKRD36B	S25	M27	L28	0.977	0.959	0.755	-76.557	-9.645
54851	ANKRD49	S510	M418	L9	1	0.656	0.76	-27.07	6.149
203286	ANKS6	S880	M511	L115	0.755	0.47	0.417	-12.427	-17.008
54443	ANLN	S349	M59	L9	0.735	0.965	0.26	-37.975	9.44
55107	ANO1	S6	M8	L10	0.899	1	0.97	-45.358	-41.808
8125	ANP32A	S874	M419	L28	0.855	0.735	0.503	45.502	-9.686
81611	ANP32E	S64	M10	L12	0.819	0.949	0.9	-100.658	-5.666
8416	ANXA9	S287	M127	L92	1	0.941	0.63	-32.233	-105.019
162	AP1B1	S323	M280	L198	1	1	1	-108.941	-62.342
164	AP1G1	S323	M280	L198	1	1	1	-109.169	-62.376
8906	AP1G2	S650	M52	L60	0.66	0.829	0.565	-0.885	18.544
1174	AP1S1	S185	M166	L146	0.995	0.99	0.551	50.186	-17.592
160	AP2A1	S77	M103	L109	0.99	1	0.96	-56.202	-25.474
1173	AP2M1	S77	M103	L109	1	1	0.98	-56.186	-27.841
1175	AP2S1	S77	M103	L109	1	1	0.98	-55.985	-27.234
8546	AP3B1	S222	M209	L167	0.99	0.99	0.96	-25.797	127.263
324	APC	S510	M418	L9	1	0.656	0.76	-26.262	6.952
10297	APC2	S174	M182	L1	0.944	0.912	0.667	-5.492	69.021
27301	APEX2	S167	M90	L48	0.915	0.884	0.453	35.961	107.287
8539	API5	S404	M258	L9	0.755	0.655	0.339	-35.891	-5.044
341	APOC1	S236	M223	L1	0.98	0.929	0.901	10.548	49.365
23780	APOL2	S118	M84	L3	0.955	0.517	0.825	3.515	-46.03
353	APRT	S441	M358	L264	1	0.94	0.697	136.546	7.379
364	AQP7	S755	M277	L116	1	0.559	0.786	-96.958	58.943
9716	AQR	S11	M2	L3	0.577	0.965	0.825	1.265	-30.847
372	ARCN1	S219	M2	L3	0.705	0.938	0.825	-4.896	-34.633
9870	AREL1	S734	M292	L222	1	0.986	0.788	-113.858	44.098
375	ARF1	S70	M41	L51	0.495	0.995	0.742	55.348	49.186
377	ARF3	S83	M38	L15	1	1	0.71	-86.938	-34.152
378	ARF4	S400	M348	L191	1	1	0.97	77.94	54.341
382	ARF6	S28	M39	L47	0.932	0.893	0.557	33.02	-45.626
84364	ARFGAP2	S97	M115	L52	0.988	0.954	0.959	-116.474	8.726
10139	ARFRP1	S856	M126	L33	0.8	0.98	0.792	88.445	61.73
503582	ARGFX	S826	M4	L1	0.59	0.95	0.983	32.003	50.186
55082	ARGLU1	S867	M578	L36	1	0.895	0.5	-11.274	76.839
392	ARHGAP1	S595	M306	L3	1	0.92	0.422	11.293	-48.424
9824	ARHGAP11A	S816	M620	L180	1	0.975	0.963	101.216	-18.262
89839	ARHGAP11B	S816	M620	L180	1	0.975	0.963	101.187	-18.257
57636	ARHGAP23	S86	M95	L14	0.985	0.755	0.542	42.897	-59.826
9411	ARHGAP29	S87	M59	L9	0.933	0.955	0.218	-41.991	11.442
23526	ARHGAP45	S392	M346	L214	1	1	0.818	-69.036	-5.605
394	ARHGAP5	S802	M66	L46	0.95	0.75	0.386	-49.072	9.887
64333	ARHGAP9	S596	M38	L15	0.945	0.983	0.708	-92.038	-35.978
9826	ARHGEF11	S514	M10	L12	0.775	0.876	0.879	-99.929	-11.689
9181	ARHGEF2	S86	M95	L14	0.863	0.629	0.613	45.139	-59.434
64283	ARHGEF28	S724	M12	L16	0.66	0.974	0.791	-54.835	22.784
100271715	ARHGEF33	S499	M1	L2	0.715	1	0.975	-22.333	-81.793
7984	ARHGEF5	S879	M631	L269	0.915	0.843	0.43	-24.273	111.17
8874	ARHGEF7	S215	M6	L5	0.885	0.702	0.798	48.415	22.491
8289	ARID1A	S51	M80	L86	1	1	0.99	-114.539	27.955
57492	ARID1B	S51	M80	L86	1	1	0.99	-115.202	26.826
196528	ARID2	S138	M135	L127	0.99	0.935	0.593	-70.464	-12.941
1820	ARID3A	S156	M96	L1	0.835	0.721	0.762	18.095	21.777
10620	ARID3B	S901	M15	L18	0.69	0.525	0.569	-56.122	-6.156
5926	ARID4A	S20	M32	L29	0.918	0.903	0.603	29.485	-38.176
51742	ARID4B	S562	M138	L133	0.91	0.847	0.891	-76.212	91.924
10865	ARID5A	S29	M19	L14	0.988	1	0.843	43.252	-51.416
25820	ARIH1	S290	M48	L45	0.825	0.989	0.86	80.386	-22.048
115761	ARL11	S24	M9	L11	1	0.97	0.553	38.816	-1.296
402	ARL2	S211	M196	L6	0.985	0.353	0.341	6.735	0.942
379	ARL4D	S237	M215	L166	0.89	0.74	0.381	-7.726	28.565
390790	ARL5C	S621	M19	L14	0.475	0.654	0.765	47.146	-56.47
51329	ARL6IP4	S283	M1	L2	0.71	0.967	0.975	-11.551	-69.137
55207	ARL8B	S75	M61	L43	1	1	1	44.965	118.927
79798	ARMC5	S13	M6	L5	0.397	1	0.955	61.851	36.079
93436	ARMC6	S36	M50	L17	0.986	0.533	0.842	-79.765	15.921
79637	ARMC7	S166	M31	L1	0.933	0.673	0.95	31.305	65.719
339541	ARMH1	S630	M225	L4	1	0.685	0.67	-51.397	-60.998
79591	ARMH3	S41	M65	L25	0.901	0.855	0.943	42.409	87.809
405	ARNT	S602	M431	L243	1	1	1	61.97	-93.29
10552	ARPC1A	S166	M31	L1	0.92	0.67	0.975	30.44	64.009
10109	ARPC2	S70	M41	L51	1	0.995	0.747	59.065	49.64
10094	ARPC3	S70	M41	L51	1	0.995	0.747	57.818	49.558
10093	ARPC4	S70	M41	L51	1	0.995	0.747	57.569	49.438
10092	ARPC5	S507	M417	L41	0.99	0.68	0.878	113.144	24.596
10776	ARPP19	S392	M346	L214	1	1	0.818	-67.691	-3.81
410	ARSA	S220	M207	L105	0.994	0.909	0.93	-58.192	99.763
153642	ARSK	S502	M1	L2	0.94	0.984	0.975	-23.816	-84.237
51130	ASB3	S3	M4	L1	0.985	0.99	0.983	28.888	56.503
140459	ASB6	S73	M83	L25	1	0.99	0.631	7.214	59.919
10973	ASCC3	S292	M105	L55	0.995	0.975	0.816	69.024	-49.226
25842	ASF1A	S359	M323	L196	1	1	0.975	-26.574	115.685
55723	ASF1B	S52	M18	L17	0.98	0.975	0.859	-89.07	18.492
55870	ASH1L	S461	M117	L61	0.735	1	1	131.276	-19.487
9070	ASH2L	S463	M389	L234	1	1	0.995	-76.97	112.643
41	ASIC1	S902	M1	L2	0	0.66	0.805	-8.948	-87.454
435	ASL	S732	M165	L144	0.64	0.989	0.756	-69.909	16.793
439	ASNA1	S586	M363	L224	1	1	1	-22.249	139.197
440	ASNS	S267	M137	L125	1	1	0.905	-127.127	16.596
259266	ASPM	S196	M176	L155	1	0.969	0.782	-32.202	-72.753
151516	ASPRV1	S371	M74	L1	0.94	0.896	0.251	21.625	9.037
445	ASS1	S315	M274	L115	0.69	0.695	0.626	-13.484	-17.872
55210	ATAD3A	S128	M3	L4	0.705	0.959	0.98	-68.971	-79.9
83858	ATAD3B	S462	M9	L11	0.685	0.992	0.681	42.64	2.667
466	ATF1	S483	M423	L15	1	0.925	0.641	-83.575	-40.098
468	ATF4	S267	M137	L125	1	1	0.905	-126.719	16.628
55729	ATF7IP	S346	M305	L217	1	1	0.96	-48.871	2.776
60673	ATG101	S341	M301	L212	1	1	1	72.484	-114.688
9776	ATG13	S341	M301	L212	1	1	1	73.168	-115.347
23130	ATG2A	S6	M8	L10	0.989	1	0.97	-42.001	-41.991
84971	ATG4D	S671	M507	L278	1	1	0.415	-74.376	12.15
79065	ATG9A	S341	M301	L212	1	1	1	72.605	-114.802
471	ATIC	S79	M16	L7	0.925	0.995	1	11.382	-124.491
64225	ATL2	S254	M238	L112	0.995	0.995	0.91	-81.825	88.886
23300	ATMIN	S715	M545	L314	1	1	0.99	-9.37	64.087
57130	ATP13A1	S298	M66	L46	0.97	0.51	0.734	-81.799	20.613
476	ATP1A1	S43	M16	L7	1	1	1	5.301	-124.438
483	ATP1B3	S698	M28	L7	0.805	0.975	0.931	22.761	-119.381
91419	ATP23	S276	M198	L2	0.97	0.745	0.795	-29.643	-86.744
488	ATP2A2	S476	M388	L266	1	1	0.875	-109.012	-49.276
490	ATP2B1	S74	M8	L10	0.844	0.985	0.949	-49.661	-36.954
493	ATP2B4	S600	M10	L12	0.67	0.618	0.784	-93.817	-5.746
27032	ATP2C1	S50	M40	L26	1	1	0.899	91.289	-0.965
498	ATP5F1A	S21	M37	L35	1	1	0.85	-88.707	-82.232
506	ATP5F1B	S21	M37	L35	1	1	0.85	-90.158	-81.695
509	ATP5F1C	S21	M37	L35	1	1	0.85	-91.544	-80.572
513	ATP5F1D	S21	M37	L35	1	1	0.85	-93.221	-80.929
514	ATP5F1E	S21	M37	L35	1	1	0.85	-93.458	-80.899
516	ATP5MC1	S691	M5	L1	0.755	0.692	0.98	0.03	89.041
521	ATP5ME	S21	M37	L35	1	1	0.85	-90.153	-81.267
9551	ATP5MF	S21	M37	L35	1	1	0.85	-90.993	-82.199
10632	ATP5MG	S21	M37	L35	1	1	0.85	-91.06	-83.212
9556	ATP5MPL	S1	M1	L2	0.98	1	0.975	-15.592	-79.759
515	ATP5PB	S21	M37	L35	1	1	0.85	-89.837	-82.29
10476	ATP5PD	S21	M37	L35	1	1	0.85	-90.557	-80.475
522	ATP5PF	S21	M37	L35	1	1	0.85	-89.532	-80.216
539	ATP5PO	S21	M37	L35	1	1	0.85	-88.98	-81.329
537	ATP6AP1	S624	M467	L19	0.995	0.446	0.242	-5.174	3.562
10159	ATP6AP2	S624	M467	L19	0.995	0.446	0.242	-5.118	3.255
535	ATP6V0A1	S244	M231	L173	1	1	0.98	54.489	118.127
23545	ATP6V0A2	S823	M1	L2	0.756	0.97	0.97	-9.952	-83.525
533	ATP6V0B	S114	M5	L1	0.505	1	0.99	1.205	81.093
527	ATP6V0C	S110	M102	L99	0.995	0.97	0.758	48.064	14.151
9114	ATP6V0D1	S210	M2	L3	0.97	0.5	0.825	8.451	-28.379
8992	ATP6V0E1	S194	M86	L9	0.54	0.769	0.513	-37.415	-1.678
523	ATP6V1A	S110	M102	L99	0.995	0.97	0.758	47.868	13.803
526	ATP6V1B2	S110	M102	L99	1	0.975	0.753	48.015	12.928
528	ATP6V1C1	S197	M164	L93	1	0.955	0.558	-3.41	48.433
51382	ATP6V1D	S110	M102	L99	1	0.975	0.753	47.847	11.455
9296	ATP6V1F	S114	M5	L1	0.505	1	0.99	2.488	81.105
51606	ATP6V1H	S110	M102	L99	1	0.975	0.753	47.692	12.33
538	ATP7A	S95	M17	L27	1	1	0.823	28.125	-67.143
91647	ATPAF2	S417	M341	L8	0.965	0.55	0.985	-72.332	-91.419
545	ATR	S357	M315	L20	1	0.47	0.754	93.573	28.277
84126	ATRIP	S357	M315	L20	1	0.47	0.754	93.429	27.799
8455	ATRN	S701	M6	L5	0.525	1	0.955	68.194	34.754
546	ATRX	S222	M209	L167	1	1	0.97	-26.903	127.385
25814	ATXN10	S303	M54	L44	0.944	0.869	0.515	72.719	28.818
550	AUP1	S63	M75	L50	0.957	0.979	0.91	103.572	18.176
6790	AURKA	S848	M504	L163	1	0.935	0.767	75.425	-2.24
54998	AURKAIP1	S2	M3	L4	0.992	1	0.98	-72.13	-72.493
9212	AURKB	S464	M351	L36	0.985	0.362	0.328	35.503	15.576
57099	AVEN	S527	M31	L1	0.94	0.601	0.847	36.941	64.701
553	AVPR1B	S422	M344	L10	0.575	0.635	0.854	-49.501	-44.619
51582	AZIN1	S79	M16	L7	0.925	0.995	1	9.905	-123.357
126792	B3GALT6	S23	M20	L32	1	1	0.904	102.824	-7.124
26229	B3GAT3	S23	M20	L32	1	1	0.904	104.694	-4.509
10678	B3GNT2	S721	M468	L295	0.69	0.729	0.292	-65.697	82.03
10331	B3GNT3	S36	M50	L17	1	0.548	0.862	-82.242	15.84
79369	B3GNT4	S311	M319	L192	0.668	0.561	0.634	46.015	-24.627
8703	B4GALT3	S903	M10	L12	0	0.603	0.721	-109.662	-7.735
9334	B4GALT5	S815	M533	L175	1	0.955	0.385	89.476	14.658
11285	B4GALT7	S23	M20	L32	1	1	0.904	105.891	-6.172
9532	BAG2	S31	M1	L2	0.672	0.698	0.724	-29.061	-90.474
7917	BAG6	S169	M15	L18	1	0.973	0.685	-60.734	-1.427
578	BAK1	S7	M5	L1	0.992	0.995	0.99	-2.623	76.787
25805	BAMBI	S257	M147	L124	0.815	0.585	0.545	104.614	71.855
8815	BANF1	S465	M1	L2	0.705	0.856	0.949	-15.83	-60.277
8314	BAP1	S104	M92	L23	0.995	0.625	0.661	54.178	-32.329
580	BARD1	S353	M314	L20	0.995	0.965	0.602	80.172	7.536
343472	BARHL2	S33	M33	L34	1	1	0.965	-105.723	-26.059
9031	BAZ1B	S383	M248	L186	0.66	0.665	0.652	-56.288	57.46
582	BBS1	S6	M8	L10	0.977	0.99	0.96	-42.327	-34.496
27241	BBS9	S468	M240	L1	1	0.905	0.806	40.429	62.321
63827	BCAN	S904	M130	L18	0.695	0.441	0.342	-98.171	5.075
9564	BCAR1	S5	M6	L5	1	0.995	0.949	57.067	29.781
8412	BCAR3	S5	M6	L5	1	0.995	0.949	57.567	30.959
10286	BCAS2	S24	M9	L11	0.957	0.927	0.468	41.32	-3.519
54828	BCAS3	S334	M90	L48	0.905	0.789	0.377	82.583	28.779
56647	BCCIP	S157	M78	L76	1	0.99	0.497	-23.325	46.445
144233	BCDIN3D	S83	M38	L15	1	1	0.71	-86.861	-32.489
596	BCL2	S433	M362	L7	0.844	0.403	0.196	41.927	-31.605
598	BCL2L1	S53	M79	L49	0.97	0.98	0.905	62.242	-65.03
599	BCL2L2	S249	M66	L46	0.995	0.985	0.702	-52.984	9.468
604	BCL6	S840	M535	L5	0.98	0.66	0.929	62.996	27.355
283149	BCL9L	S893	M224	L179	0.825	0.984	0.938	122.736	-46.411
9774	BCLAF1	S239	M106	L104	0.425	0.947	0.732	-8.129	16.097
53630	BCO1	S737	M590	L3	0.92	0.65	0.68	3.956	-29.381
54880	BCOR	S229	M217	L61	0.955	0.969	0.632	-15.128	12.034
617	BCS1L	S10	M13	L8	1	0.725	0.98	-57.132	-104.198
622	BDH1	S90	M87	L81	1	0.99	0.925	10.733	-100.198
55814	BDP1	S453	M439	L1	0.965	0.853	0.646	41.346	45.866
8678	BECN1	S389	M297	L209	1	1	1	-147.608	-8.406
57596	BEGAIN	S614	M2	L3	0.41	0.63	0.825	-5.789	-30.865
10282	BET1	S22	M22	L31	1	1	0.944	51.755	-2.155
79365	BHLHE41	S115	M139	L36	0.975	0.93	0.358	40.55	15.576
23299	BICD2	S905	M632	L92	0.692	0.571	0.315	-30.73	-95.478
274	BIN1	S626	M572	L1	0.925	0.48	0.628	41.37	37.856
329	BIRC2	S116	M98	L108	1	0.94	0.583	-60.569	4.986
332	BIRC5	S436	M350	L1	0.97	0.59	0.235	-59.327	30.117
57448	BIRC6	S155	M97	L83	1	1	0.94	41.141	-76.351
282991	BLOC1S2	S202	M175	L2	0.965	0.655	0.96	-10.947	-92.299
657	BMPR1A	S524	M31	L1	0.755	0.784	0.772	31.623	70.584
9790	BMS1	S810	M599	L292	0.97	0.63	0.442	-33.801	39.368
662	BNIP1	S443	M357	L112	1	0.965	0.592	-84.915	91.583
23246	BOP1	S459	M254	L1	0.99	0.55	0.222	-22.679	42.42
79866	BORA	S3	M4	L1	0.962	1	0.983	21.095	54.001
118426	BORCS5	S75	M61	L43	1	1	1	42.877	116.319
119032	BORCS7	S457	M61	L43	0.8	1	0.892	42.788	113.442
10380	BPNT1	S492	M397	L1	1	0.57	0.799	0.68	93.134
2186	BPTF	S383	M248	L186	0.945	1	0.875	-55.265	56.793
673	BRAF	S745	M190	L119	0.995	0.888	0.776	-26.021	92.221
8315	BRAP	S669	M57	L38	0.585	0.48	0.365	-6.181	-10.55
672	BRCA1	S353	M314	L20	0.995	0.965	0.602	80.273	7.447
675	BRCA2	S478	M43	L20	0.99	0.718	0.669	-64.295	67.229
23774	BRD1	S849	M586	L336	1	1	0.965	74.959	122.556
6046	BRD2	S111	M109	L101	0.989	1	0.788	-27.96	66.134
23476	BRD4	S18	M26	L13	0.855	0.99	0.773	-41.22	63.395
29117	BRD7	S138	M135	L127	0.99	0.935	0.593	-70.331	-13.395
10902	BRD8	S71	M100	L110	0.995	0.995	0.995	8.696	124.603
65980	BRD9	S543	M213	L40	0.83	0.955	0.508	-6.24	35.072
2972	BRF1	S282	M243	L160	1	0.995	0.63	10.768	14.127
55290	BRF2	S7	M5	L1	1	1	0.99	5.362	78.415
83990	BRIP1	S32	M36	L42	1	1	1	85.006	73.913
55299	BRIX1	S160	M170	L21	0.99	0.905	0.38	71.784	-12.535
55845	BRK1	S191	M41	L51	0.505	0.995	0.742	54.9	46.623
25855	BRMS1	S548	M446	L10	0.995	0.915	0.741	-48.577	-32.956
84312	BRMS1L	S495	M405	L16	1	0.825	0.467	-61.475	19.047
7862	BRPF1	S461	M117	L61	0.735	1	1	132.018	-19.698
26580	BSCL2	S6	M8	L10	0.977	0.99	0.96	-41.081	-33.573
682	BSG	S163	M29	L24	0.65	0.888	0.792	-28.899	22.012
9044	BTAF1	S451	M368	L229	1	1	0.709	-45.301	56.763
388419	BTBD17	S23	M20	L32	1	1	0.904	105.369	-3.495
114781	BTBD9	S696	M482	L78	0.61	0.533	0.202	-52.76	32.382
689	BTF3	S345	M304	L153	0.98	0.96	0.791	-12.377	44.635
91408	BTF3L4	S198	M172	L145	0.99	0.913	0.382	35.405	28.986
699	BUB1	S906	M120	L87	0.91	0.54	0.693	89.693	-10.218
701	BUB1B	S96	M25	L6	0.975	0.665	0.386	23.226	2.129
9184	BUB3	S96	M25	L6	0.933	0.685	0.406	22.32	1.248
84811	BUD13	S281	M186	L157	1	0.885	0.503	72.575	75.789
114049	BUD23	S22	M22	L31	1	1	0.944	49.255	-3.125
8896	BUD31	S22	M22	L31	1	1	0.944	50.201	-0.738
705	BYSL	S3	M4	L1	1	1	0.983	31.589	55.379
60314	C12orf10	S686	M573	L290	0.965	0.879	0.485	30.851	46.411
121053	C12orf45	S14	M1	L2	0.894	0.99	0.975	-0.88	-81.772
79794	C12orf49	S39	M56	L62	1	0.995	0.95	-78.651	67.34
284018	C17orf58	S554	M457	L94	0.94	0.69	0.422	51.751	-24.784
28974	C19orf53	S40	M58	L21	0.985	0.99	0.67	-28.76	38.817
10438	C1D	S338	M296	L21	1	0.895	0.403	-34.634	48.067
708	C1QBP	S2	M3	L4	0.992	1	0.98	-72.526	-73.852
114897	C1QTNF1	S224	M212	L131	1	0.985	0.818	-68.138	30.311
387911	C1QTNF9B	S422	M344	L10	0.716	0.575	0.692	-48.043	-47.967
54955	C1orf109	S58	M89	L1	1	0.86	0.473	-17.853	39.016
54987	CZIB	S687	M525	L72	1	0.875	0.641	-42.471	-75.961
128061	C1orf131	S14	M1	L2	0.91	0.99	0.975	-7.43	-85.461
79630	C1orf54	S31	M1	L2	0.458	1	0.975	-23.593	-87.625
148304	C1orf74	S16	M10	L12	0.684	0.746	0.683	-107.088	-12.784
84645	C22orf23	S243	M229	L121	0.98	0.965	0.638	-82.862	0.592
205327	C2orf69	S5	M6	L5	0.863	1	0.955	61.08	29.976
285237	C3orf38	S5	M6	L5	0.98	0.995	0.949	54.739	23.622
221545	C6orf136	S907	M633	L4	0	0	0.745	-77.63	-60.061
29113	C6orf15	S405	M1	L2	0.92	0.939	0.89	-101.391	-72.304
65265	C8orf33	S255	M159	L139	1	0.995	0.665	45.061	78.274
763	CA5A	S842	M119	L2	0.78	0.705	0.762	-6.254	-66.585
766	CA7	S523	M420	L232	1	0.935	0.789	-99.168	30.162
51719	CAB39	S127	M104	L107	0.95	0.985	0.858	47.724	-36.402
23523	CABIN1	S359	M323	L196	1	1	0.975	-26.338	114.846
57010	CABP4	S6	M8	L10	0.836	1	0.97	-44.204	-39.657
8913	CACNA1G	S224	M212	L131	1	1	0.823	-68.089	31.336
782	CACNB1	S631	M5	L1	0.605	0.775	0.955	9.734	85.86
784	CACNB3	S376	M340	L223	0.98	0.98	0.975	-96.583	-45.236
790	CAD	S165	M177	L7	1	0.905	0.96	18.773	-128.956
199731	CADM4	S236	M223	L1	0.98	0.929	0.901	11.127	49.269
805	CALM2	S223	M211	L169	0.995	0.95	0.662	-17.371	92.076
83698	CALN1	S490	M403	L3	0.91	0.64	0.789	5.429	-51.475
811	CALR	S52	M18	L17	1	0.995	0.879	-87.662	21.944
10645	CAMKK2	S48	M77	L82	0.5	0.583	0.596	-63.154	83.347
819	CAMLG	S586	M363	L224	1	1	1	-21.819	139.438
55832	CAND1	S20	M32	L29	0.995	0.96	0.638	29.815	-35.934
10487	CAP1	S126	M148	L9	0.995	0.88	0.452	-31.374	-4.038
826	CAPNS1	S275	M201	L17	1	0.835	0.626	-73.985	24.654
4076	CAPRIN1	S97	M115	L52	0.734	0.935	0.894	-113.256	6.7
828	CAPS	S36	M50	L17	0.968	0.477	0.873	-82.338	18.3
832	CAPZB	S126	M148	L9	0.995	0.94	0.412	-31.448	-6.344
29775	CARD10	S410	M332	L216	1	0.94	0.538	61.282	-77.932
84433	CARD11	S84	M5	L1	0.96	0.545	0.99	14.375	74.262
10498	CARM1	S811	M571	L18	0.97	0.495	0.602	-50.388	-2.932
833	CARS	S597	M365	L6	0.995	0.685	0.396	9.91	-6.533
79587	CARS2	S2	M3	L4	0.614	1	0.98	-78.774	-62.154
22794	CASC3	S53	M79	L49	1	1	0.925	64.535	-66.804
846	CASR	S908	M634	L226	0	0	0.282	-97.507	-26.268
831	CAST	S613	M570	L5	0.974	0.452	0.622	41.578	24.122
352954	CASTOR3	S185	M166	L146	1	0.995	0.556	49.117	-18.359
54897	CASZ1	S3	M4	L1	1	1	0.983	28.977	52.119
257062	CATSPERD	S1	M1	L2	0.611	1	0.975	-12.636	-83.562
57828	CATSPERG	S275	M201	L17	1	0.835	0.626	-73.538	24.353
865	CBFB	S278	M200	L90	1	0.975	0.379	28.319	-113.299
79872	CBLL1	S239	M106	L104	0.665	0.92	0.79	-9.966	13.919
869	CBLN1	S3	M4	L1	0.691	0.865	0.966	24.678	42.188
55871	CBWD1	S162	M1	L2	0.52	0.572	0.696	-22.095	-98.818
150472	CBWD2	S345	M304	L153	1	0.98	0.806	-13.563	46.853
10951	CBX1	S15	M14	L1	0.99	0.945	0.926	11.198	29.514
55749	CCAR1	S454	M372	L9	0.995	0.93	0.307	-45.726	-4.735
93233	CCDC114	S132	M18	L17	0.762	0.552	0.639	-77.704	28.325
84317	CCDC115	S58	M89	L1	1	0.86	0.473	-16.831	37.971
151903	CCDC12	S355	M317	L137	0.965	0.995	0.673	-90.113	38.017
9720	CCDC144A	S134	M99	L96	0.98	0.85	0.445	-35.939	79.354
339184	CCDC144NL	S134	M99	L96	0.98	0.85	0.445	-35.791	79.724
28952	CCDC22	S42	M60	L70	1	1	1	59.656	106.289
339834	CCDC36	S6	M8	L10	1	1	0.97	-40.682	-37.638
79714	CCDC51	S2	M3	L4	0.97	1	0.98	-81.051	-62.534
131076	CCDC58	S788	M98	L108	0.955	0.858	0.528	-65.935	4.134
8030	CCDC6	S748	M530	L305	1	0.995	0.692	86.218	-71.756
91409	CCDC74B	S60	M4	L1	0.904	0.926	0.983	36.35	52.559
124093	CCDC78	S772	M108	L100	0.995	0.852	0.52	78.378	44.783
338657	CCDC84	S166	M31	L1	0.555	0.649	0.975	32.307	62.443
55231	CCDC87	S6	M8	L10	1	1	0.97	-42.985	-38.295
80212	CCDC92	S1	M1	L2	0.975	1	0.975	-20.246	-76.987
54520	CCDC93	S12	M2	L3	1	0.505	0.825	-0.175	-44.503
10850	CCL27	S118	M84	L3	0.955	0.517	0.825	3.362	-46.816
890	CCNA2	S143	M48	L45	1	0.96	0.853	82.043	-16.413
891	CCNB1	S143	M48	L45	0.95	0.99	0.879	81.298	-18.516
85417	CCNB3	S847	M87	L81	0.965	0.993	0.851	-41.979	-67.722
892	CCNC	S704	M26	L13	0.94	0.938	0.772	-47.515	61.487
595	CCND1	S93	M123	L120	1	1	0.995	26.057	-90.072
894	CCND2	S433	M362	L7	0.942	0.485	0.189	40.555	-31.343
896	CCND3	S500	M203	L161	1	0.984	0.824	87.67	37.008
898	CCNE1	S269	M251	L178	1	1	0.925	122.821	17.851
899	CCNF	S445	M366	L268	1	0.99	0.47	-25.582	76.613
902	CCNH	S17	M12	L16	0.93	0.935	0.784	15.036	-6.866
8812	CCNK	S146	M11	L22	0.97	0.555	0.395	15.496	8.465
57018	CCNL1	S519	M425	L267	1	1	0.965	51.094	-93.096
81669	CCNL2	S179	M187	L149	0.841	0.926	0.426	-39.844	41.079
904	CCNT1	S217	M28	L7	0.805	0.735	0.421	22.804	-113.941
9738	CCP110	S48	M77	L82	1	1	0.975	-59.452	81.822
9973	CCS	S95	M17	L27	0.985	1	0.82	24.758	-70.449
10576	CCT2	S344	M311	L3	1	0.915	0.484	-21.993	-19.449
7203	CCT3	S344	M311	L3	1	0.915	0.484	-21.669	-19.854
10575	CCT4	S9	M1	L2	0.5	0.986	0.975	-18.143	-68.151
22948	CCT5	S160	M170	L21	1	0.925	0.357	69.878	-12.426
908	CCT6A	S82	M2	L3	0.735	0.924	0.825	-0.267	-26.82
10574	CCT7	S396	M9	L11	0.865	0.925	0.577	37.528	5.057
10694	CCT8	S139	M145	L2	1	0.726	0.975	4.691	-71.836
977	CD151	S845	M2	L3	0.68	0.61	0.825	-12.934	-43.278
912	CD1D	S567	M390	L21	0.775	0.54	0.533	-107.747	-5.826
10421	CD2BP2	S376	M340	L223	1	1	0.99	-97.753	-46.107
10849	CD3EAP	S618	M149	L57	0.646	0.508	0.534	-17.221	65.389
921	CD5	S231	M205	L1	1	0.91	0.589	22.947	75.209
974	CD79B	S47	M4	L1	0.888	0.945	0.975	17.757	41.402
926	CD8B	S505	M415	L261	1	0.995	0.93	0.629	-100.725
146059	CDAN1	S829	M203	L161	0.805	1	0.758	90.532	38.989
8872	CDC123	S3	M4	L1	1	1	0.983	23.436	50.234
8555	CDC14B	S909	M635	L81	0	0.333	0.208	-24.056	-4.912
8881	CDC16	S3	M4	L1	0.962	1	0.983	20.997	53.274
991	CDC20	S412	M262	L1	1	0.975	0.265	29.528	-9.034
8697	CDC23	S85	M122	L113	1	0.995	0.37	31.204	8.712
993	CDC25A	S127	M104	L107	0.945	0.98	0.853	48.922	-36.367
994	CDC25B	S143	M48	L45	1	0.96	0.853	81.829	-16.117
995	CDC25C	S334	M90	L48	0.905	0.789	0.377	82.221	28.975
246184	CDC26	S54	M70	L80	0.925	0.905	0.542	53.538	-12.315
996	CDC27	S85	M122	L113	1	0.995	0.365	32.907	8.714
11140	CDC37	S910	M52	L60	0.47	0.465	0.444	-13.896	38.688
51362	CDC40	S99	M116	L37	1	0.98	0.853	91.436	-29.956
998	CDC42	S123	M6	L5	0.755	0.99	0.955	61.245	40.356
10435	CDC42EP2	S911	M636	L10	0	0	0.571	-102.768	17.876
56882	CDC42SE1	S16	M10	L12	0.724	0.96	0.895	-105.937	-10.424
8318	CDC45	S136	M30	L6	0.995	0.98	0.436	17.318	-14.1
988	CDC5L	S8	M2	L3	0.986	0.845	0.825	-9.175	-26.675
990	CDC6	S368	M96	L1	0.98	0.732	0.723	6.935	28.24
8317	CDC7	S860	M597	L45	1	0.995	0.758	-88.795	102.847
79577	CDC73	S247	M230	L181	1	0.935	0.495	57.739	12.002
113130	CDCA5	S142	M54	L44	0.985	0.975	0.67	76.774	22.827
55143	CDCA8	S38	M5	L1	0.925	0.779	0.959	19.728	79.497
999	CDH1	S112	M136	L9	1	0.875	0.762	-33.716	7.769
1013	CDH15	S93	M123	L120	0.918	0.995	0.995	25.033	-87.339
1000	CDH2	S13	M6	L5	0.495	1	0.955	62.072	37.858
64403	CDH24	S67	M49	L6	1	1	0.436	35.865	-22.977
60437	CDH26	S15	M14	L1	0.984	0.94	0.925	10.208	27.977
1003	CDH5	S523	M420	L232	0.99	0.925	0.78	-100.109	29.729
10423	CDIPT	S37	M23	L1	0.89	0.98	0.297	-17.699	25.144
983	CDK1	S15	M14	L1	0.98	0.945	0.926	12.27	31.888
728642	CDK11A	S519	M425	L267	1	1	0.965	51.03	-92.534
984	CDK11B	S519	M425	L267	1	1	0.965	51.031	-92.542
51755	CDK12	S607	M543	L22	0.884	0.48	0.386	16.648	8.661
8621	CDK13	S98	M110	L3	0.99	0.75	0.798	15.432	-38.997
1017	CDK2	S269	M251	L178	1	1	0.925	122.828	17.932
10263	CDK2AP2	S74	M8	L10	0.885	0.99	0.97	-49.812	-40.848
1019	CDK4	S93	M123	L120	1	1	0.995	26.695	-89.937
51654	CDK5RAP1	S12	M2	L3	0.874	0.5	0.825	0.717	-50.01
55755	CDK5RAP2	S196	M176	L155	1	0.99	0.79	-31.219	-71.797
80279	CDK5RAP3	S91	M63	L53	1	1	0.92	87.057	51.14
1021	CDK6	S500	M203	L161	1	0.984	0.824	87.794	37.096
1022	CDK7	S96	M25	L6	0.933	0.685	0.406	21.557	0.645
1024	CDK8	S704	M26	L13	0.94	0.938	0.772	-47.729	61.286
1025	CDK9	S464	M351	L36	0.955	0.351	0.316	35.452	14.78
8760	CDS2	S274	M256	L39	1	1	0.887	53.39	58.291
81620	CDT1	S364	M335	L221	0.837	0.98	0.795	72.606	61.427
55573	CDV3	S31	M1	L2	0.807	0.92	0.934	-27.964	-90.07
9425	CDYL	S113	M74	L1	0.925	0.821	0.261	20.957	16.94
1087	CEACAM7	S693	M531	L11	1	0.82	0.545	36.913	-4.108
1050	CEBPA	S546	M442	L36	0.98	0.77	0.327	7.3	24.853
1051	CEBPB	S222	M209	L167	0.995	0.995	0.975	-28.895	128.517
10153	CEBPZ	S100	M118	L122	0.935	0.915	0.354	73.774	-32.292
1990	CELA1	S246	M232	L170	0.955	0.92	0.575	-31.163	-53.45
10658	CELF1	S442	M355	L16	0.975	0.489	0.283	-6.002	40.131
1058	CENPA	S180	M188	L152	1	1	0.965	-102.107	41.397
1059	CENPB	S283	M1	L2	0.71	0.967	0.975	-10.419	-70.119
1060	CENPC	S446	M396	L2	0.98	0.88	0.814	3.888	-85.813
1062	CENPE	S251	M234	L176	1	1	0.68	77.264	-45.333
1063	CENPF	S56	M57	L38	1	1	0.879	74.65	8.621
64946	CENPH	S819	M5	L1	0.975	0.99	0.839	0.819	68.898
2491	CENPI	S55	M34	L19	1	1	0.582	-11.543	1.224
55835	CENPJ	S48	M77	L82	1	1	0.975	-60.816	83.155
64105	CENPK	S819	M5	L1	0.975	0.99	0.839	0.939	69.019
91687	CENPL	S567	M390	L21	0.755	0.53	0.482	-27.036	42.773
55839	CENPN	S754	M5	L1	0.8	0.98	0.99	2.485	70.645
79172	CENPO	S251	M234	L176	1	0.995	0.675	76.942	-46.651
80152	CENPT	S830	M628	L2	0.99	0.81	0.764	-36.343	-65.407
79682	CENPU	S251	M234	L176	1	0.995	0.675	77.028	-46.325
387103	CENPW	S830	M628	L2	0.99	0.81	0.764	-36.367	-65.387
201254	CENPX	S683	M577	L65	0.885	0.295	0.309	71.909	-7.347
22994	CEP131	S101	M4	L1	0.535	1	0.983	19.761	50.587
9662	CEP135	S48	M77	L82	1	1	0.975	-59.235	83.406
55125	CEP192	S1	M1	L2	0.816	1	0.975	-12.228	-77.465
80184	CEP290	S912	M1	L2	0	0.99	0.975	-4.108	-79.636
85459	CEP295	S1	M1	L2	0.869	1	0.975	-15.138	-87.633
9857	CEP350	S604	M371	L231	1	1	0.94	-30.8	134.288
55165	CEP55	S423	M309	L218	0.995	1	1	76.831	-95.216
9702	CEP57	S196	M176	L155	0.928	0.839	0.763	-31.77	-69.721
23177	CEP68	S1	M1	L2	0.682	1	0.975	-12.774	-81.455
64793	CEP85	S258	M241	L165	0.995	0.99	0.819	-57.054	92.523
10390	CEPT1	S287	M127	L92	0.814	0.647	0.503	-33.138	-108.465
51148	CERCAM	S73	M83	L25	1	0.99	0.631	7.095	59.753
29956	CERS2	S232	M220	L25	0.995	0.95	0.968	66.723	67.211
29105	CFAP20	S325	M282	L37	1	0.655	0.707	97.32	-32.974
56683	CFAP298	S3	M4	L1	0.995	1	0.983	22.164	51.334
149465	CFAP57	S630	M225	L4	1	0.685	0.67	-51.49	-61.411
629	CFB	S608	M478	L6	0.956	0.485	0.346	-80.177	51.691
10428	CFDP1	S640	M114	L64	0.98	0.734	0.572	22.933	63.892
1072	CFL1	S126	M148	L9	1	0.94	0.419	-31.047	-5.188
8837	CFLAR	S53	M79	L49	1	1	0.925	62.171	-67.479
10036	CHAF1A	S259	M30	L6	0.985	0.725	0.392	14.413	-18.828
8208	CHAF1B	S259	M30	L6	0.99	0.731	0.398	14.383	-17.591
283489	CHAMP1	S255	M159	L139	1	0.995	0.665	45.197	78.734
118487	CHCHD1	S363	M3	L4	0.82	0.916	0.98	-60.657	-72.09
51142	CHCHD2	S875	M48	L45	0.55	0.533	0.556	83.815	-13.818
54927	CHCHD3	S228	M55	L66	1	0.985	0.465	-73.935	-32.532
1105	CHD1	S733	M496	L277	1	0.995	0.472	64.142	24.191
1106	CHD2	S367	M330	L187	1	0.995	0.879	99.397	-55.684
1108	CHD4	S368	M96	L1	0.85	0.669	0.6	-13.04	60.397
55636	CHD7	S574	M409	L257	1	0.93	0.63	-90.372	-103.187
57680	CHD8	S169	M15	L18	0.995	0.964	0.685	-60.32	0.012
1111	CHEK1	S497	M404	L1	1	0.57	0.344	28.937	-13.954
10523	CHERP	S454	M372	L9	0.995	0.93	0.307	-44.947	-3.947
1117	CHI3L2	S147	M2	L3	0.95	0.551	0.825	6.86	-41.648
1119	CHKA	S793	M605	L10	1	0.74	0.6	-2.017	-114.342
1121	CHM	S18	M26	L13	0.954	0.97	0.756	-47.342	64.965
1122	CHML	S540	M124	L111	0.765	0.422	0.486	-39.732	68.13
27243	CHMP2A	S806	M603	L306	1	0.984	0.705	-86.903	80.488
51652	CHMP3	S806	M603	L306	1	0.984	0.705	-86.898	80.495
128866	CHMP4B	S274	M256	L39	1	1	0.887	53.154	58.345
51510	CHMP5	S53	M79	L49	0.925	0.995	0.92	60.024	-68.608
79643	CHMP6	S390	M4	L1	0.583	0.972	0.983	18.21	58.201
91782	CHMP7	S413	M336	L95	1	0.87	0.429	-22.756	101.604
26973	CHORDC1	S58	M89	L1	0.985	0.86	0.473	-15.307	38.818
11261	CHP1	S175	M183	L156	1	1	1	41.902	-111.85
1144	CHRND	S872	M290	L205	0.995	1	0.955	93.322	-100.075
1146	CHRNG	S872	M290	L205	0.995	1	0.955	93.305	-100.124
10164	CHST4	S182	M14	L1	0.605	0.84	0.919	10.631	23.797
64377	CHST8	S133	M141	L57	0.974	0.925	0.757	-14.543	66.687
63922	CHTF18	S171	M162	L79	1	1	0.965	28.893	105.502
54921	CHTF8	S171	M162	L79	1	1	0.965	29.534	105.317
26097	CHTOP	S452	M250	L90	0.63	0.59	0.73	-61.374	-18.16
1147	CHUK	S410	M332	L216	1	0.94	0.538	61.774	-76.938
9391	CIAO1	S153	M5	L1	0.785	0.472	0.829	68.955	50.143
51647	CIAO2B	S317	M114	L64	1	0.985	0.662	30.134	96.245
64428	CIAO3	S3	M4	L1	0.893	1	0.983	22.728	55.47
57019	CIAPIN1	S640	M114	L64	0.975	0.747	0.575	22.839	64.648
51550	CINP	S565	M23	L1	0.95	0.555	0.312	-17.894	34.44
57650	CIP2A	S348	M334	L20	0.99	0.87	0.717	96.231	27.701
9541	CIR1	S178	M185	L118	0.995	0.845	0.391	-74.918	59.894
11113	CIT	S423	M309	L218	0.995	0.99	0.995	78.537	-94.781
10370	CITED2	S156	M96	L1	0.815	0.711	0.742	18.798	21.127
25792	CIZ1	S73	M83	L25	0.99	0.985	0.635	5.702	58.665
26586	CKAP2	S155	M97	L83	0.799	0.918	0.79	39.305	-77.441
9793	CKAP5	S117	M120	L87	1	1	0.835	90.591	-13.14
1163	CKS1B	S269	M251	L178	1	1	0.925	122.057	17.139
11129	CLASRP	S325	M282	L37	1	0.655	0.707	97.294	-33.284
149461	CLDN19	S3	M4	L1	1	1	0.983	26.259	54.184
9074	CLDN6	S552	M31	L1	0.96	0.549	0.836	46.54	43.812
25932	CLIC4	S212	M199	L3	0.627	0.533	0.57	-18.022	-38.36
1196	CLK2	S493	M359	L103	1	0.61	0.454	-86.414	-12.811
1207	CLNS1A	S143	M48	L45	0.985	0.945	0.838	80.963	-15.098
10978	CLP1	S371	M74	L1	0.94	0.913	0.251	21.546	11.75
81570	CLPB	S16	M10	L12	0.595	0.582	0.53	-105.518	-13.684
8192	CLPP	S569	M428	L263	1	1	0.92	-37.548	-121.996
1208	CLPS	S878	M593	L1	1	0.995	0.503	-8.788	90.326
10845	CLPX	S569	M428	L263	1	1	0.92	-37.799	-121.95
63967	CLSPN	S530	M353	L11	0.915	0.984	0.21	86.868	23.036
1212	CLTB	S61	M88	L71	1	1	0.87	-72.37	-43.189
1213	CLTC	S28	M39	L47	0.993	0.929	0.582	33.56	-46.172
23277	CLUH	S120	M3	L4	0.89	0.995	0.98	-83.356	-67.09
80790	CMIP	S708	M32	L29	0.685	0.474	0.296	-29.253	-11.977
51727	CMPK1	S165	M177	L7	1	0.905	0.96	18.597	-131.172
23070	CMTR1	S60	M4	L1	0.75	0.807	0.919	45.456	48.416
1258	CNGB1	S113	M74	L1	0.835	0.882	0.211	25.165	14.317
10175	CNIH1	S106	M108	L100	1	0.885	0.52	82.388	42.523
29097	CNIH4	S57	M35	L1	0.995	0.55	0.934	20.419	31.707
1265	CNN2	S289	M236	L2	0.935	0.803	0.867	3.952	-65.357
23019	CNOT1	S385	M278	L193	1	0.92	0.655	16.66	-81.267
25904	CNOT10	S385	M278	L193	1	0.92	0.655	17.009	-81.533
55571	CNOT11	S385	M278	L193	1	0.92	0.655	17.088	-81.718
4848	CNOT2	S361	M325	L215	1	1	0.561	69.908	0.866
4849	CNOT3	S361	M325	L215	1	1	0.561	70.091	1.121
246175	CNOT6L	S831	M629	L83	0.995	0.615	0.819	40.668	-80.766
29883	CNOT7	S831	M629	L83	0.995	0.615	0.819	40.673	-80.65
9125	CNOT9	S385	M278	L193	0.985	0.905	0.65	18.514	-80.821
1267	CNP	S112	M136	L9	1	0.875	0.762	-32.012	6.733
10330	CNPY2	S50	M40	L26	1	1	0.899	91.498	1.933
80347	COASY	S43	M16	L7	1	0.995	1	5.249	-129.657
1690	COCH	S727	M567	L103	1	0.655	0.508	-71.337	6.335
9382	COG1	S80	M107	L106	1	1	0.805	-11.043	129.206
22796	COG2	S80	M107	L106	1	1	0.805	-11.808	131.019
83548	COG3	S80	M107	L106	1	1	0.805	-11.683	130.184
25839	COG4	S80	M107	L106	1	1	0.805	-11.596	129.445
10466	COG5	S80	M107	L106	1	1	0.805	-10.388	129.958
57511	COG6	S80	M107	L106	1	1	0.805	-9.937	129.16
91949	COG7	S80	M107	L106	1	1	0.805	-10.29	129.671
84342	COG8	S913	M4	L1	0.675	0.599	0.411	23.023	62.527
8161	COIL	S158	M168	L14	0.935	0.595	0.487	-1.035	26.158
1308	COL17A1	S644	M520	L331	1	0.975	0.83	-5.304	-57.069
84570	COL25A1	S72	M9	L11	0.97	0.976	0.574	32.159	-1.155
10087	COL4A3BP	S41	M65	L25	0.928	0.874	0.956	42.02	86.982
1294	COL7A1	S440	M360	L3	0.955	0.679	0.341	-15.723	-22.054
1299	COL9A3	S420	M125	L117	0.915	0.989	0.724	100.336	56.259
51397	COMMD10	S42	M60	L70	1	1	1	61.231	106.702
23412	COMMD3	S42	M60	L70	1	1	1	59.638	106.105
28991	COMMD5	S42	M60	L70	1	1	1	61.269	105.061
54951	COMMD8	S42	M60	L70	1	1	1	60.427	106.41
1312	COMT	S25	M27	L28	1	0.975	0.88	-81.624	-4.863
64326	COP1	S264	M151	L74	1	1	0.945	2.313	10.773
1314	COPA	S184	M189	L141	1	1	0.975	-72.324	47.104
1315	COPB1	S561	M1	L2	0.827	0.965	0.975	-12.457	-64.949
9276	COPB2	S184	M189	L141	1	1	0.975	-72.222	47.38
11316	COPE	S184	M189	L141	1	1	0.975	-72.029	46.279
22820	COPG1	S400	M348	L191	1	1	0.97	77.654	54.558
9318	COPS2	S20	M32	L29	0.6	0.965	0.633	28.386	-33
8533	COPS3	S20	M32	L29	0.6	0.965	0.633	29.303	-33.101
51138	COPS4	S20	M32	L29	0.6	0.965	0.633	29.541	-32.748
10987	COPS5	S20	M32	L29	0.6	0.965	0.633	29.071	-34.025
10980	COPS6	S20	M32	L29	0.6	0.965	0.633	27.255	-34.599
50813	COPS7A	S20	M32	L29	0.6	0.965	0.633	28.103	-31.997
10920	COPS8	S20	M32	L29	0.6	0.965	0.633	28.759	-33.65
150678	COPS9	S491	M375	L255	0.98	0.99	0.571	-47.68	87.896
22818	COPZ1	S184	M189	L141	1	1	0.975	-71.915	48.24
84274	COQ5	S4	M7	L8	0.955	1	0.985	-68.072	-93.602
51004	COQ6	S417	M341	L8	0.965	0.55	0.985	-70.974	-91.976
10229	COQ7	S417	M341	L8	0.965	0.55	0.985	-71.74	-92.348
23603	CORO1C	S87	M59	L9	0.933	0.955	0.218	-41.53	11.903
84940	CORO6	S86	M95	L14	0.985	0.755	0.542	43.609	-60.07
1352	COX10	S10	M13	L8	0.985	0.725	0.98	-55.748	-107.867
1353	COX11	S10	M13	L8	1	0.725	0.98	-54.804	-106.322
84987	COX14	S601	M13	L8	0.985	0.704	0.98	-59.442	-110.684
1355	COX15	S319	M3	L4	0.94	0.955	0.975	-63.334	-64.603
10063	COX17	S4	M7	L8	1	1	0.985	-64.46	-104.463
285521	COX18	S4	M7	L8	1	1	0.985	-71.76	-97.028
116228	COX20	S774	M592	L308	1	0.995	0.64	-63.828	-85.071
1327	COX4I1	S10	M13	L8	1	0.725	0.98	-56.354	-106.349
84701	COX4I2	S227	M12	L16	0.789	0.977	0.814	-24.294	12.626
9377	COX5A	S10	M13	L8	1	0.725	0.98	-57.686	-102.324
1329	COX5B	S10	M13	L8	1	0.725	0.98	-58.027	-105.811
1337	COX6A1	S601	M13	L8	0.985	0.704	0.98	-59.69	-111.321
1340	COX6B1	S10	M13	L8	1	0.725	0.98	-56.178	-105.053
1345	COX6C	S10	M13	L8	1	0.725	0.98	-54.832	-102.183
1349	COX7B	S647	M488	L8	0.99	0.795	0.974	-65.828	-90.418
1350	COX7C	S10	M13	L8	0.975	0.725	0.98	-61.825	-106.075
27151	CPAMD8	S52	M18	L17	1	0.995	0.879	-87.129	22.938
1362	CPD	S50	M40	L26	1	1	0.899	90.624	-0.013
1363	CPE	S20	M32	L29	0.83	0.861	0.561	29.352	-39.43
57699	CPNE5	S405	M1	L2	0.92	0.939	0.89	-101.378	-72.268
27132	CPNE7	S3	M4	L1	0.774	0.945	0.983	24.774	44.824
1371	CPOX	S130	M154	L135	1	1	1	-24.303	-127.837
29894	CPSF1	S782	M596	L3	0.975	0.79	0.451	-8.539	-21.404
53981	CPSF2	S508	M106	L104	0.975	0.965	0.79	-7.286	10.865
51692	CPSF3	S82	M2	L3	0.354	0.899	0.799	-2.41	-29.319
10898	CPSF4	S342	M5	L1	0.915	0.937	0.965	15.169	88.881
1374	CPT1A	S6	M8	L10	1	1	0.97	-40.003	-38.522
1376	CPT2	S439	M225	L4	0.68	0.735	0.657	-55.189	-58.715
1379	CR1L	S64	M10	L12	0.995	0.919	0.895	-98.512	-7.286
57585	CRAMP1	S379	M125	L117	1	1	0.99	100.379	59.163
92359	CRB3	S506	M416	L1	0.965	0.86	0.664	44.783	67.955
27297	CRCP	S35	M5	L1	0.845	0.964	0.99	13.566	85.032
1385	CREB1	S730	M581	L274	1	0.995	0.525	93.923	-45.622
10488	CREB3	S402	M321	L116	1	0.985	0.944	-99.267	56.709
1387	CREBBP	S213	M197	L40	0.98	0.93	0.401	60.412	-16.075
9419	CRIPT	S129	M140	L75	1	0.988	0.831	61.999	-9.184
1398	CRK	S5	M6	L5	1	0.995	0.949	55.889	32.119
1399	CRKL	S5	M6	L5	1	0.995	0.949	55.369	28.523
54675	CRLS1	S354	M55	L66	0.91	0.985	0.455	-71.811	-36.242
51340	CRNKL1	S66	M52	L60	0.98	0.86	0.639	29.948	21.17
64784	CRTC3	S314	M273	L190	0.944	0.885	0.673	-47.528	101.445
1406	CRX	S133	M141	L57	0.95	0.975	0.756	-11.227	69.687
1417	CRYBB3	S437	M27	L28	0.895	0.515	0.765	-77.518	-2.674
1419	CRYGB	S393	M1	L2	0.965	0.603	0.975	-15.909	-71.429
51084	CRYL1	S67	M49	L6	1	1	0.436	36.388	-22.42
1431	CS	S203	M193	L138	1	1	1	-75.551	-108.82
7812	CSDE1	S854	M55	L66	0.985	0.931	0.545	48.825	-84.049
1434	CSE1L	S11	M2	L3	0.469	0.93	0.825	7.147	-34.635
1443	CSH2	S914	M637	L12	0.68	0.573	0.66	-96.056	-8.638
1445	CSK	S915	M75	L50	0.725	0.665	0.804	-50.745	127.968
1452	CSNK1A1	S510	M418	L9	1	0.656	0.76	-26.657	6.537
1453	CSNK1D	S155	M97	L83	0.99	0.995	0.935	39.738	-75.71
1457	CSNK2A1	S857	M554	L324	1	1	1	127.606	53.099
1460	CSNK2B	S857	M554	L324	1	1	1	127.609	53.102
1464	CSPG4	S367	M330	L187	1	0.995	0.879	99.315	-54.578
1471	CST3	S916	M638	L30	0.61	0.61	0.624	63.334	93.944
1474	CST6	S422	M344	L10	0.985	0.71	0.955	-48.124	-46.332
1477	CSTF1	S364	M335	L221	1	0.975	0.789	70.938	60.101
1478	CSTF2	S219	M2	L3	0.75	0.84	0.793	-20.276	-32.832
1479	CSTF3	S917	M639	L1	0.906	0.497	0.207	-3.371	39.702
64693	CTAGE1	S418	M286	L1	0.99	0.53	0.943	27.367	40.254
643854	CTAGE9	S418	M286	L1	0.99	0.53	0.943	27.869	41.266
1487	CTBP1	S594	M445	L233	1	0.97	0.865	6.848	42.628
1488	CTBP2	S594	M445	L233	1	0.97	0.865	7.033	42.696
80169	CTC1	S777	M594	L131	0.985	0.935	0.762	-70.021	35.391
10664	CTCF	S383	M248	L186	0.945	1	0.875	-55.249	55.707
23399	CTDNEP1	S395	M284	L199	1	1	0.975	5.783	47.708
9150	CTDP1	S198	M172	L145	0.84	0.92	0.333	32.485	29.383
10106	CTDSP2	S614	M2	L3	0.38	0.59	0.825	-7.575	-46.041
51496	CTDSPL2	S148	M128	L3	0.939	0.93	0.534	19.416	-61.631
1499	CTNNB1	S641	M486	L119	1	0.99	0.62	-27.305	85.619
56998	CTNNBIP1	S390	M4	L1	0.98	0.87	0.758	16.237	58.232
56259	CTNNBL1	S24	M9	L11	0.954	0.919	0.447	42.158	-5.173
1500	CTNND1	S45	M72	L63	1	0.915	0.455	-33.201	-16.603
1503	CTPS1	S165	M177	L7	1	0.905	0.96	18.685	-130.386
56474	CTPS2	S89	M2	L3	0.975	0.605	0.825	-9.704	-46.059
9646	CTR9	S247	M230	L181	1	0.935	0.495	58.477	12.211
8722	CTSF	S277	M247	L10	0.995	0.945	0.963	-43.328	-46.217
2017	CTTN	S551	M8	L10	0.66	0.985	0.97	-46.249	-36.014
90353	CTU1	S27	M44	L54	1	1	1	-39.608	110.102
348180	CTU2	S27	M44	L54	1	1	1	-38.114	109.547
8454	CUL1	S143	M48	L45	0.915	0.955	0.854	80.009	-18.626
8453	CUL2	S122	M144	L132	1	1	0.575	108.919	36.636
8452	CUL3	S152	M161	L68	1	1	0.985	38.838	-94.325
8450	CUL4B	S89	M2	L3	0.89	0.59	0.82	-11.405	-48.293
9820	CUL7	S608	M478	L6	0.956	0.485	0.346	-80.014	51.177
57703	CWC22	S183	M82	L6	0.789	0.844	0.367	25.176	-18.817
54883	CWC25	S355	M317	L137	0.965	0.995	0.673	-90.568	37.422
55280	CWF19L1	S99	M116	L37	1	0.98	0.853	93.665	-29.916
58191	CXCL16	S12	M2	L3	1	0.505	0.825	-1.868	-43.206
30827	CXXC1	S562	M138	L133	0.995	0.79	0.821	-77.22	91.343
1534	CYB561	S224	M212	L131	0.985	0.985	0.818	-67.781	32.632
11068	CYB561D2	S506	M416	L1	0.96	0.855	0.669	43.895	68.246
80777	CYB5B	S39	M56	L62	1	0.995	0.95	-81.196	67.235
51167	CYB5R4	S95	M17	L27	0.99	1	0.825	25.378	-69.709
1537	CYC1	S10	M13	L8	1	0.725	0.98	-55.243	-103.823
54205	CYCS	S10	M13	L8	0.975	0.725	0.98	-62.366	-106.186
23191	CYFIP1	S191	M41	L51	0.505	0.995	0.742	53.648	47.485
50626	CYHR1	S377	M51	L59	0.995	0.992	0.765	19.683	98.049
1540	CYLD	S116	M98	L108	1	0.94	0.583	-62.998	4.769
340665	CYP26C1	S470	M384	L237	1	1	0.97	-59.308	-46.719
1594	CYP27B1	S684	M101	L15	0.68	0.87	0.658	-91.622	-43.459
54905	CYP2W1	S41	M65	L25	0.995	0.97	0.955	37.507	81.287
57834	CYP4F11	S582	M449	L2	0.965	0.508	0.663	21.319	-25.123
8529	CYP4F2	S181	M130	L18	0.94	0.623	0.421	-95.609	8.6
1603	DAD1	S400	M348	L191	1	1	0.97	76.482	55.571
221955	DAGLB	S41	M65	L25	0.995	0.97	0.955	36.972	80.708
199699	DAND5	S561	M1	L2	0.827	0.965	0.975	-11.519	-65.069
7818	DAP3	S488	M3	L4	0.905	0.927	0.98	-61.967	-67.138
1615	DARS	S100	M118	L122	1	0.975	0.393	75.941	-33.88
55157	DARS2	S774	M592	L308	1	0.995	0.64	-63.798	-85.274
1616	DAXX	S222	M209	L167	1	1	0.97	-26.965	127.312
26528	DAZAP1	S712	M544	L3	0.855	0.645	0.619	-1.803	-23.689
10926	DBF4	S860	M597	L45	1	0.995	0.758	-88.793	102.845
1622	DBI	S90	M87	L81	1	0.99	0.925	11.802	-101.144
51163	DBR1	S58	M89	L1	1	0.86	0.473	-17.07	39.453
26094	DCAF4	S634	M514	L53	0.965	0.715	0.508	47.029	48.425
55827	DCAF6	S796	M542	L12	0.99	0.87	0.318	-111.47	-12.328
51473	DCDC2	S1	M1	L2	0.925	1	0.975	-19.087	-80.48
64858	DCLRE1B	S170	M169	L95	0.995	0.995	0.97	-19.291	104.678
167227	DCP2	S172	M180	L142	0.99	1	0.985	86.356	-80.16
28960	DCPS	S397	M320	L24	0.82	0.645	0.423	23.662	-46.594
1639	DCTN1	S201	M2	L3	0.91	0.603	0.825	-14.81	-47.377
10540	DCTN2	S142	M54	L44	0.68	0.939	0.647	72.692	23.897
11258	DCTN3	S28	M39	L47	0.97	0.925	0.66	37.849	-47.15
51164	DCTN4	S303	M54	L44	0.899	0.879	0.545	72.618	26.984
84516	DCTN5	S3	M4	L1	1	1	0.983	25.42	57.072
10671	DCTN6	S303	M54	L44	0.899	0.879	0.545	72.568	26.353
79077	DCTPP1	S1	M1	L2	0.83	0.989	0.97	-17.041	-86.02
51181	DCXR	S149	M195	L65	0.97	0.91	0.812	-49.227	48.182
79016	DDA1	S132	M18	L17	0.952	0.864	0.884	-78.968	26.201
1642	DDB1	S20	M32	L29	0.6	0.965	0.633	27.047	-35.679
84301	DDI2	S220	M207	L105	1	0.99	0.934	-58.185	102.075
1649	DDIT3	S121	M101	L15	0.625	0.855	0.695	-86.118	-41.863
1650	DDOST	S327	M265	L26	1	0.775	0.613	95.973	9.953
65992	DDRGK1	S91	M63	L53	1	1	0.92	89.591	49.946
1653	DDX1	S918	M640	L24	0.513	0.6	0.314	22.54	-44.228
1662	DDX10	S606	M12	L16	0.96	0.622	0.753	-49.927	20.32
10521	DDX17	S919	M641	L1	0.555	0.448	0.619	10.573	87.555
8886	DDX18	S100	M118	L122	1	0.98	0.388	75.25	-32.696
55308	DDX19A	S160	M170	L21	1	0.92	0.363	71	-10.632
11269	DDX19B	S553	M454	L1	0.92	0.355	0.903	26.873	37.314
11218	DDX20	S312	M46	L1	0.759	0.653	0.384	34.878	-12.178
9188	DDX21	S40	M58	L21	1	0.99	0.67	-30.485	40.744
9416	DDX23	S376	M340	L223	1	1	0.99	-97.63	-46.214
57062	DDX24	S26	M11	L22	1	0.98	0.379	15.82	2.691
55661	DDX27	S362	M42	L41	0.995	0.45	0.49	-30.413	54.111
55794	DDX28	S407	M3	L4	0.975	0.872	0.98	-64.321	-74.582
10212	DDX39A	S559	M461	L3	1	0.805	0.736	9.739	-20.479
7919	DDX39B	S837	M121	L9	0.945	0.429	0.402	-43.327	-1.629
1654	DDX3X	S741	M565	L337	1	1	0.935	-9.49	-4.767
51428	DDX41	S69	M46	L1	1	0.93	0.359	38.442	-16.225
11325	DDX42	S509	M361	L6	0.975	0.675	0.325	30.502	-19.607
9879	DDX46	S69	M46	L1	1	0.93	0.359	38.075	-13.914
51202	DDX47	S475	M387	L3	1	0.6	0.779	16.511	-45.755
54555	DDX49	S702	M69	L84	0.98	0.921	0.309	-37.438	29.839
1655	DDX5	S812	M49	L6	0.615	0.99	0.434	36.03	-27.693
317781	DDX51	S780	M595	L98	1	0.79	0.323	-32.947	31.991
11056	DDX52	S403	M308	L21	0.985	0.75	0.408	-30.204	49.085
79039	DDX54	S140	M155	L129	1	1	0.93	73.604	-57.464
57696	DDX55	S140	M155	L129	1	1	0.93	73.938	-58.172
54606	DDX56	S245	M143	L6	0.995	0.885	0.242	67.881	-36.231
83479	DDX59	S652	M495	L12	0.765	0.73	0.283	-103.198	-2.48
1656	DDX6	S172	M180	L142	0.99	1	0.985	86.656	-81.182
9909	DENND4B	S1	M1	L2	0.979	1	0.975	-18.369	-78.035
8562	DENR	S484	M413	L5	1	0.9	0.517	1.749	51.753
55635	DEPDC1	S31	M1	L2	0.744	0.99	0.975	-25.623	-94.631
79139	DERL1	S63	M75	L50	1	1	0.975	102.764	15.769
51009	DERL2	S63	M75	L50	1	1	0.975	105.653	16.299
55070	DET1	S264	M151	L74	1	1	0.945	2.406	10.742
28955	DEXI	S826	M4	L1	0.59	0.95	0.983	32.315	49.708
1677	DFFB	S84	M5	L1	0.947	0.548	0.99	13.735	76.818
85359	DGCR6L	S25	M27	L28	1	0.985	0.89	-77.987	-6.851
54487	DGCR8	S124	M146	L3	1	0.98	0.822	16.181	-30.092
8527	DGKD	S746	M290	L205	1	0.993	0.928	94.144	-97.54
8526	DGKE	S525	M430	L253	0.99	0.99	0.95	122.044	64.009
79947	DHDDS	S195	M173	L6	0.905	0.825	0.387	19.582	-21.115
1719	DHFR	S486	M399	L7	0.995	0.45	1	14.914	-126.325
200895	DHFR2	S486	M399	L7	0.995	0.45	1	14.74	-126.971
1723	DHODH	S165	M177	L7	1	0.905	0.96	18.692	-128.511
1725	DHPS	S103	M2	L3	0.495	0.61	0.825	-12.47	-36.974
10901	DHRS4	S495	M405	L16	1	0.825	0.467	-61.094	18.534
25979	DHRS7B	S920	M56	L62	0	0.72	0.759	-76.72	62.081
207063	DHRSX	S153	M5	L1	0.862	0.521	0.83	71.626	49.896
1665	DHX15	S85	M122	L113	0.96	0.955	0.391	29.559	8.532
8449	DHX16	S589	M452	L250	0.92	0.715	0.574	25.156	27.205
54505	DHX29	S708	M32	L29	0.685	0.474	0.296	-29.159	-11.74
22907	DHX30	S306	M326	L35	0.995	0.675	0.588	-82.184	-81.646
56919	DHX33	S58	M89	L1	0.49	0.75	0.376	-20.199	41.222
60625	DHX35	S99	M116	L37	1	0.98	0.853	92.398	-31.022
170506	DHX36	S478	M43	L20	0.98	0.703	0.661	-64.632	68.351
57647	DHX37	S218	M206	L162	1	0.945	0.421	85.323	-37.292
9785	DHX38	S378	M105	L55	1	1	0.601	66.191	-44.636
1659	DHX8	S85	M122	L113	0.94	0.935	0.345	33.381	8.053
1660	DHX9	S921	M30	L6	0	0.253	0.238	23.345	-24.473
56616	DIABLO	S12	M2	L3	0.543	0.492	0.825	0.736	-41.85
1729	DIAPH1	S305	M349	L189	0.98	0.62	0.364	-63.104	-11.427
81624	DIAPH3	S13	M6	L5	0.655	1	0.955	63.625	37.446
23405	DICER1	S570	M429	L242	0.935	0.605	0.798	76.34	-11.375
11083	DIDO1	S111	M109	L101	0.93	0.93	0.808	-26.89	62.117
27292	DIMT1	S695	M614	L304	1	1	0.595	81.588	-31.345
57609	DIP2B	S83	M38	L15	1	1	0.71	-87.837	-32.297
22894	DIS3	S783	M598	L335	1	0.995	0.823	21.283	90.581
115752	DIS3L	S1	M1	L2	0.975	1	0.975	-20.243	-77.769
1736	DKC1	S44	M29	L24	0.985	0.974	0.833	-29.522	17.742
1738	DLD	S34	M53	L67	1	0.98	0.687	-7.627	-121.383
1742	DLG4	S922	M15	L18	0	0.72	0.515	-56.404	-2.797
9231	DLG5	S207	M6	L5	0.49	0.834	0.929	49.4	27.47
9787	DLGAP5	S117	M120	L87	1	1	0.835	93.025	-12.566
1743	DLST	S34	M53	L67	0.975	0.995	0.675	-4.112	-122.209
1747	DLX3	S541	M354	L230	0.615	0.37	0.214	-21.198	32.179
90871	DMAC1	S4	M7	L8	1	1	0.985	-67.24	-104.892
55929	DMAP1	S92	M62	L23	1	0.995	0.75	61.491	-39.42
93099	DMKN	S133	M141	L57	0.985	0.965	0.758	-13.865	68.025
1657	DMXL1	S110	M102	L99	1	0.975	0.753	47.746	10.676
54919	DNAAF5	S297	M73	L88	1	0.93	0.644	-65.843	44.071
25981	DNAH1	S441	M358	L264	1	0.94	0.697	137.193	6.481
196385	DNAH10	S1	M1	L2	0.833	1	0.975	-10.729	-79.04
3301	DNAJA1	S778	M568	L325	1	1	0.93	38.645	-121.47
10294	DNAJA2	S778	M568	L325	1	1	0.93	38.641	-121.472
9093	DNAJA3	S865	M536	L71	1	0.73	0.825	-73.678	-48.067
3337	DNAJB1	S36	M50	L17	1	0.519	0.843	-84.259	15.249
54788	DNAJB12	S373	M337	L1	0.98	0.68	0.954	2.553	65.364
10049	DNAJB6	S268	M239	L182	1	0.99	0.808	2.163	22.937
55735	DNAJC11	S228	M55	L66	1	0.985	0.465	-73.262	-34.026
55192	DNAJC17	S7	M5	L1	0.867	1	0.99	2.646	84.462
131118	DNAJC19	S462	M9	L11	0.685	0.992	0.681	43.23	3.18
27000	DNAJC2	S40	M58	L21	1	0.99	0.67	-30.243	42.422
134218	DNAJC21	S450	M63	L53	0.99	0.883	0.91	86.675	48.28
285126	DNAJC5G	S254	M238	L112	0.98	0.98	0.894	-83.541	86.592
7266	DNAJC7	S419	M179	L148	1	1	0.92	31.807	-77
22826	DNAJC8	S923	M642	L339	0	0	0	10.089	-83.854
23234	DNAJC9	S829	M203	L161	0.805	1	0.758	90.608	39.041
373863	DND1	S554	M457	L94	0.94	0.69	0.422	51.794	-24.657
1759	DNM1	S41	M65	L25	0.99	0.965	0.95	37.715	83.721
10059	DNM1L	S253	M3	L4	0.94	0.991	0.98	-82.231	-76.014
1785	DNM2	S77	M103	L109	1	1	0.98	-56.542	-29.023
1786	DNMT1	S195	M173	L6	0.983	0.901	0.318	17.694	-23.357
30836	DNTTIP2	S293	M2	L3	0.95	0.644	0.825	-4.785	-39.422
80005	DOCK5	S5	M6	L5	1	0.995	0.949	54.776	31.717
57572	DOCK6	S52	M18	L17	1	0.995	0.879	-87.785	20.44
85440	DOCK7	S123	M6	L5	0.755	0.99	0.955	62.372	40.016
22845	DOLK	S37	M23	L1	0.985	0.98	0.297	-19.256	28.212
57171	DOLPP1	S153	M5	L1	0.862	0.521	0.83	71.02	49.646
29980	DONSON	S57	M35	L1	0.674	0.58	0.927	23.553	30.6
84444	DOT1L	S260	M117	L61	1	1	1	128.764	-20.617
1798	DPAGT1	S38	M5	L1	0.46	0.939	0.99	14.807	81.493
5977	DPF2	S51	M80	L86	1	1	0.99	-113.603	27.578
1801	DPH1	S135	M153	L94	1	0.995	0.815	60.255	4.653
1802	DPH2	S135	M153	L94	1	0.995	0.815	60.071	4.437
285381	DPH3	S27	M44	L54	1	1	1	-35.681	108.185
51611	DPH5	S135	M153	L94	1	0.995	0.815	59.516	4.78
92715	DPH7	S135	M153	L94	1	0.995	0.815	61.245	4.862
8813	DPM1	S242	M228	L134	1	0.99	0.38	104.114	9.667
8818	DPM2	S242	M228	L134	1	0.99	0.38	104.086	9.224
29952	DPP7	S41	M65	L25	1	0.975	0.96	39.207	82.11
91039	DPP9	S36	M50	L17	0.93	0.5	0.74	89.323	2.964
151871	DPPA2	S162	M1	L2	0.95	0.987	0.975	-21.123	-96.33
283417	DPY19L2	S418	M286	L1	0.99	0.53	0.943	28.418	41.505
84661	DPY30	S463	M389	L234	1	1	0.995	-76.956	112.745
1810	DR1	S451	M368	L229	1	1	0.709	-45.321	56.322
128338	DRAM2	S33	M33	L34	0.995	1	0.96	-105.959	-30.859
10589	DRAP1	S451	M368	L229	1	1	0.709	-45.323	56.198
4733	DRG1	S874	M419	L28	0.855	0.735	0.503	45.464	-9.675
1819	DRG2	S134	M99	L96	0.97	0.84	0.445	-36.267	77.747
29102	DROSHA	S160	M170	L21	0.99	0.905	0.38	72.147	-12.55
79075	DSCC1	S171	M162	L79	1	1	0.965	29.459	105.361
79980	DSN1	S611	M469	L2	0.985	0.893	0.5	-17.342	-12.503
1834	DSPP	S118	M84	L3	0.89	0.517	0.825	1.576	-46.839
112487	DTD2	S360	M324	L194	1	1	0.879	36.374	-67.782
51514	DTL	S259	M30	L6	0.905	0.7	0.367	12.674	-18.008
1841	DTYMK	S279	M208	L7	1	0.985	0.964	-0.15	-131.293
50506	DUOX2	S46	M15	L18	1	1	0.689	-54.756	-7.622
405753	DUOXA2	S49	M76	L7	0.993	0.866	0.755	10.095	-106.879
11221	DUSP10	S435	M17	L27	0.815	0.71	0.713	-5.198	-16.957
8446	DUSP11	S213	M197	L40	0.878	0.893	0.385	58.425	-15.428
56940	DUSP22	S71	M100	L110	0.995	0.995	0.995	8.719	123.111
1846	DUSP4	S612	M151	L74	0.691	0.563	0.636	-1.486	11.657
1847	DUSP5	S394	M295	L93	1	0.79	0.404	105.89	-26.903
1854	DUT	S136	M30	L6	0.995	0.98	0.436	15.845	-12.89
1855	DVL1	S250	M133	L130	0.98	1	0.955	47.26	95.142
1778	DYNC1H1	S751	M11	L22	0.955	0.899	0.389	11.692	-0.345
1781	DYNC1I2	S115	M139	L36	0.905	0.878	0.331	39.866	12.145
1783	DYNC1LI2	S843	M54	L44	0.85	0.878	0.615	75.249	25.936
8655	DYNLL1	S715	M545	L314	1	1	0.99	-9.361	64.084
83658	DYNLRB1	S115	M139	L36	0.905	0.878	0.331	40.125	12.546
6993	DYNLT1	S610	M476	L13	0.677	0.36	0.385	-37.524	73.745
1859	DYRK1A	S169	M15	L18	1	0.973	0.685	-62.098	-1.964
1869	E2F1	S262	M244	L102	1	0.995	0.828	120.505	23.13
1871	E2F3	S262	M244	L102	1	0.995	0.828	121.644	22.862
1874	E2F4	S871	M611	L313	1	1	0.75	112.014	48.497
1876	E2F6	S659	M559	L28	1	0.995	0.377	112.887	-36.343
1877	E4F1	S564	M437	L55	0.995	0.745	0.637	-16.072	19.428
85403	EAF1	S119	M142	L136	1	0.96	0.827	-57.614	71.347
124454	EARS2	S145	M3	L4	0.904	0.845	0.98	-62.803	-59.231
1879	EBF1	S127	M104	L107	0.954	0.878	0.785	45.489	-33.123
10148	EBI3	S23	M20	L32	0.885	0.885	0.84	107.118	-6.306
10969	EBNA1BP2	S147	M2	L3	0.95	0.551	0.825	5.762	-41.497
11319	ECD	S761	M579	L1	1	0.99	0.924	-6.228	84.711
51295	ECSIT	S4	M7	L8	0.995	1	0.985	-61.52	-99.134
1894	ECT2	S549	M395	L12	0.85	0.61	0.446	-94.665	-2.924
23644	EDC4	S172	M180	L142	0.99	1	0.985	86.493	-80.622
8721	EDF1	S924	M643	L9	0.827	0.455	0.269	-40.921	-14.11
8726	EED	S229	M217	L61	1	0.995	0.675	-13.695	13.125
1915	EEF1A1	S500	M203	L161	0.91	0.995	0.898	88.878	37.817
399818	EEF1AKMT2	S101	M4	L1	0.54	1	0.983	18.969	49.504
25895	EEF1AKMT3	S121	M101	L15	0.625	0.855	0.695	-86.235	-43.137
1933	EEF1B2	S47	M4	L1	0.904	0.96	0.983	21.923	45.753
9521	EEF1E1	S636	M472	L3	0.64	0.82	0.364	-22.141	-26.32
1937	EEF1G	S153	M5	L1	0.845	0.592	0.9	69.244	48.678
1938	EEF2	S352	M313	L3	0.665	0.6	0.337	13.039	-23.288
196483	EEF2KMT	S57	M35	L1	0.995	0.55	0.934	20.929	32.328
60678	EEFSEC	S154	M163	L91	1	1	0.99	99.838	86.026
23167	EFR3A	S404	M258	L9	0.975	0.536	0.441	-37.116	-4.548
9343	EFTUD2	S11	M2	L3	0.726	0.965	0.825	3.535	-34.405
1956	EGFR	S105	M47	L9	1	0.774	0.79	-29.645	2.88
54583	EGLN1	S122	M144	L132	1	1	0.575	107.179	36.609
112398	EGLN2	S532	M73	L88	0.82	0.772	0.529	-65.419	40.449
30845	EHD3	S49	M76	L7	1	0.755	0.975	14.539	-129.673
79813	EHMT1	S664	M618	L13	0.815	0.56	0.43	-49.862	67.212
10919	EHMT2	S664	M618	L13	0.815	0.56	0.43	-49.84	67.225
10209	EIF1	S268	M239	L182	1	0.99	0.808	1.178	23.406
84285	EIF1AD	S3	M4	L1	1	1	0.983	28.027	55.903
440275	EIF2AK4	S267	M137	L125	1	1	0.905	-126.861	15.818
1967	EIF2B1	S555	M459	L2	0.975	0.925	0.545	8.899	-67.659
8892	EIF2B2	S26	M11	L22	0.783	0.894	0.385	13.672	-1.934
8891	EIF2B3	S419	M179	L148	0.995	1	0.915	32.423	-78.369
8890	EIF2B4	S316	M275	L3	1	0.735	0.768	10.94	-33.861
8893	EIF2B5	S316	M275	L3	1	0.735	0.768	11.112	-33.275
1965	EIF2S1	S26	M11	L22	0.945	0.975	0.379	17.758	-0.62
8894	EIF2S2	S563	M448	L163	0.985	0.875	0.685	-27.472	56.866
1968	EIF2S3	S752	M479	L19	0.83	0.643	0.303	-10.466	-59.332
8661	EIF3A	S702	M69	L84	0.98	0.921	0.309	-37.391	29.861
8662	EIF3B	S72	M9	L11	0.97	0.976	0.574	33.369	-1.844
8664	EIF3D	S646	M500	L2	0.995	0.605	0.975	-23.201	-71.339
3646	EIF3E	S487	M401	L249	0.995	0.615	0.237	-38.132	23.367
8665	EIF3F	S8	M2	L3	0.574	0.845	0.825	-15.004	-31.573
8666	EIF3G	S352	M313	L3	0.985	0.79	0.232	-0.857	-14.045
8667	EIF3H	S487	M401	L249	0.995	0.615	0.237	-38.253	23.386
8668	EIF3I	S597	M365	L6	0.995	0.685	0.396	9.254	-6.304
8669	EIF3J	S925	M6	L5	0	0.94	0.955	59.452	37.293
51386	EIF3L	S926	M419	L28	0.655	0.375	0.57	16.275	-83.767
10480	EIF3M	S8	M2	L3	0.574	0.845	0.825	-15.75	-31.45
1973	EIF4A1	S375	M339	L219	1	1	0.925	86.958	-61.275
1974	EIF4A2	S375	M339	L219	1	1	0.925	86.293	-61.029
9775	EIF4A3	S211	M196	L6	0.99	0.353	0.343	6.974	-0.588
1975	EIF4B	S605	M443	L164	1	1	0.94	101.358	-75.043
1977	EIF4E	S375	M339	L219	1	1	0.925	88.051	-61.665
9470	EIF4E2	S836	M505	L282	1	1	0.744	-121.032	56.436
317649	EIF4E3	S159	M119	L2	0.98	0.64	0.882	-5.175	-69.455
1981	EIF4G1	S375	M339	L219	1	1	0.925	87.805	-61.578
1982	EIF4G2	S340	M300	L23	0.985	0.965	0.405	-8.804	-13.047
8672	EIF4G3	S17	M12	L16	1	1	0.842	-54.795	16.774
1983	EIF5	S282	M243	L160	1	0.995	0.63	11.524	14.333
1984	EIF5A	S645	M515	L320	0.775	0.655	0.598	21.816	18.805
143244	EIF5AL1	S645	M515	L320	0.775	0.655	0.598	21.865	18.903
9669	EIF5B	S190	M2	L3	0.5	0.84	0.82	-6.51	-25.79
3692	EIF6	S8	M2	L3	0.972	0.84	0.825	-9.664	-25.125
7260	EIPR1	S192	M126	L33	1	0.995	0.803	-4.265	118.322
60528	ELAC2	S739	M564	L334	1	1	0.86	53.028	-78.27
1994	ELAVL1	S123	M6	L5	0.655	0.975	0.939	62.264	43.355
1998	ELF2	S53	M79	L49	0.995	1	0.925	60.123	-66.07
1999	ELF3	S547	M370	L254	0.93	0.91	0.444	52.088	-62.597
8178	ELL	S119	M142	L136	1	0.96	0.827	-56.408	71.433
80237	ELL3	S93	M123	L120	1	1	0.995	25.532	-89.789
63916	ELMO2	S13	M6	L5	0.641	1	0.955	67.309	32.781
84173	ELMOD3	S453	M439	L1	0.93	0.855	0.69	40.031	44.603
91748	ELMSAN1	S580	M451	L256	1	1	0.96	-94.376	74.562
6923	ELOB	S122	M144	L132	1	1	0.575	108.281	35.849
6921	ELOC	S197	M164	L93	1	0.955	0.558	-3.409	48.246
84337	ELOF1	S1	M1	L2	0.874	1	0.975	-14.915	-86.309
8518	ELP1	S27	M44	L54	1	1	1	-37.043	110.028
55250	ELP2	S27	M44	L54	1	1	1	-38.126	108.396
55140	ELP3	S27	M44	L54	1	1	1	-38.46	107.563
26610	ELP4	S27	M44	L54	1	1	1	-37.317	107.007
23587	ELP5	S27	M44	L54	1	1	1	-36.417	108.249
54859	ELP6	S27	M44	L54	1	1	1	-37.122	108.411
23065	EMC1	S164	M174	L154	1	1	1	116.049	76.478
9694	EMC2	S164	M174	L154	1	1	1	115.323	76.737
55831	EMC3	S164	M174	L154	1	1	1	115.616	76.283
51234	EMC4	S164	M174	L154	1	1	1	114.822	76.275
56851	EMC7	S164	M174	L154	1	1	1	115.346	75.848
27436	EML4	S795	M47	L9	0.99	0.966	0.677	-25.749	-1.114
400954	EML6	S178	M185	L118	0.98	0.83	0.393	-76.22	58.693
56946	EMSY	S216	M124	L111	1	0.99	0.93	-39.117	95.333
2023	ENO1	S44	M29	L24	0.98	0.985	0.874	-29.795	19.82
339221	ENPP7	S178	M185	L118	0.995	0.845	0.391	-74.838	59.406
2029	ENSA	S719	M127	L92	0.985	0.9	0.5	-92.999	-16.177
56943	ENY2	S388	M343	L159	1	0.99	0.789	10.777	-54.723
2033	EP300	S213	M197	L40	0.98	0.93	0.401	60.481	-16.085
57634	EP400	S71	M100	L110	1	1	1	8.636	125.88
2038	EPB42	S584	M426	L2	0.9	0.775	0.778	-23.42	-76.4
80314	EPC1	S71	M100	L110	1	1	1	7.345	127.718
26122	EPC2	S71	M100	L110	1	1	1	6.969	128.403
2044	EPHA5	S368	M96	L1	0.98	0.732	0.723	7.141	27.991
22905	EPN2	S324	M165	L144	0.95	0.975	0.749	-68.908	14.742
2058	EPRS	S473	M129	L98	1	0.922	0.554	-38.687	19.555
54869	EPS8L1	S8	M2	L3	0.98	0.845	0.825	-13.013	-29.386
79574	EPS8L3	S33	M33	L34	1	1	0.965	-106.067	-27.594
94240	EPSTI1	S927	M644	L44	0	0.396	0.199	79.341	22.515
26284	ERAL1	S2	M3	L4	0.99	1	0.98	-80.823	-68.375
2064	ERBB2	S398	M86	L9	0.96	0.618	0.716	-36.01	4.281
2065	ERBB3	S398	M86	L9	0.96	0.622	0.711	-36.36	4.907
2067	ERCC1	S32	M36	L42	1	1	1	83.74	78.074
2068	ERCC2	S297	M73	L88	1	0.93	0.644	-64.213	44.909
2071	ERCC3	S100	M118	L122	0.878	0.764	0.395	75.981	-36.853
2072	ERCC4	S32	M36	L42	1	1	1	84.368	77.272
54821	ERCC6L	S566	M411	L258	1	1	0.945	80.4	65.854
2079	ERH	S26	M11	L22	0.783	0.894	0.385	13.563	-2.353
79956	ERMP1	S276	M198	L2	0.775	0.685	0.871	-28.607	-85.907
23071	ERP44	S450	M63	L53	0.99	0.883	0.91	87.169	47.502
30816	ERVW-1	S356	M71	L1	0.92	0.571	0.959	20.148	70.964
157570	ESCO2	S142	M54	L44	0.985	0.975	0.67	77.738	22.813
51575	ESF1	S66	M52	L60	0.891	0.865	0.594	30.727	21.996
9700	ESPL1	S38	M5	L1	0.77	0.612	0.923	8.027	32.422
83715	ESPN	S769	M538	L39	1	0.93	0.615	-9.289	100.304
2099	ESR1	S119	M142	L136	1	0.96	0.827	-58.033	72.583
2101	ESRRA	S928	M8	L10	0.695	0.512	0.605	-37.877	-28.705
2104	ESRRG	S522	M427	L241	0.877	0.809	0.497	40.609	74.582
2107	ETF1	S581	M82	L6	0.62	0.513	0.389	22.885	-16.531
2117	ETV3	S308	M269	L202	1	0.995	0.536	-46.768	37.867
2119	ETV5	S818	M561	L298	1	1	0.974	119.859	-61.676
2120	ETV6	S85	M122	L113	0.96	0.955	0.391	28.88	8.421
2130	EWSR1	S288	M17	L27	0.985	0.967	0.819	21.664	-66.831
9156	EXO1	S56	M57	L38	0.775	0.99	0.874	76.026	7.117
55763	EXOC1	S294	M112	L114	1	0.87	0.944	59.425	72.01
55770	EXOC2	S294	M112	L114	1	0.87	0.944	60.792	72.022
60412	EXOC4	S524	M31	L1	0.605	0.721	0.925	31.614	68.842
10640	EXOC5	S294	M112	L114	1	0.87	0.944	59.665	72.129
23265	EXOC7	S294	M112	L114	1	0.87	0.944	60.455	73.408
149371	EXOC8	S294	M112	L114	1	0.87	0.944	60.076	72.43
51013	EXOSC1	S338	M296	L21	1	0.895	0.403	-34.544	48.292
5394	EXOSC10	S338	M296	L21	1	0.895	0.403	-34.739	49.057
23404	EXOSC2	S7	M5	L1	0.873	1	0.99	1.34	85.032
51010	EXOSC3	S1	M1	L2	0.821	1	0.975	-8.109	-80.95
54512	EXOSC4	S35	M5	L1	0.755	0.964	0.99	11.157	82.408
56915	EXOSC5	S629	M483	L3	0.92	0.615	0.451	-26.558	-39.242
118460	EXOSC6	S678	M484	L1	0.91	0.63	0.873	29.959	58.979
23016	EXOSC7	S60	M4	L1	0.908	0.921	0.975	38.762	53.285
11340	EXOSC8	S783	M598	L335	1	0.995	0.823	21.283	90.583
5393	EXOSC9	S813	M2	L3	0.805	0.534	0.825	3.123	-40.022
2131	EXT1	S23	M20	L32	1	1	0.904	103.965	-6.208
2132	EXT2	S23	M20	L32	1	1	0.904	104.117	-6.301
2146	EZH2	S229	M217	L61	1	0.995	0.675	-13.499	13.22
50848	F11R	S384	M6	L5	0.81	0.975	0.944	55.623	39.919
2147	F2	S97	M115	L52	0.96	1	0.945	-114.765	7.657
2152	F3	S834	M210	L1	0.565	0.582	0.399	-26.538	31.78
8263	F8A1	S84	M5	L1	0.988	0.515	0.964	15.533	76.247
91442	FAAP24	S32	M36	L42	0.935	0.965	0.965	80.321	72.84
2171	FABP5	S372	M303	L75	0.634	0.538	0.586	20.997	40.506
8772	FADD	S53	M79	L49	0.975	0.975	0.905	61.789	-68.454
9415	FADS2	S6	M8	L10	0.977	0.99	0.96	-42.414	-33.181
23197	FAF2	S63	M75	L50	1	1	0.975	104.107	16.639
51011	FAHD2A	S65	M64	L4	0.949	0.747	0.964	-85.927	-57.702
90736	FAM104B	S156	M96	L1	0.522	0.449	0.836	19.95	25.047
79927	FAM110D	S689	M527	L332	1	0.995	0.815	34.121	75.795
257415	FAM133B	S356	M71	L1	0.92	0.571	0.959	20.12	69.626
84908	FAM136A	S228	M55	L66	1	0.985	0.465	-74.752	-33.977
145483	FAM161B	S151	M160	L77	0.995	0.789	0.79	2.318	34.72
26355	FAM162A	S1	M1	L2	0.778	1	0.975	-11.856	-79.053
401565	FAM166A	S41	M65	L25	0.995	0.97	0.96	39.817	83.731
284069	FAM171A2	S1	M1	L2	0.861	1	0.975	-12.833	-86.707
134145	ATPSCKMT	S17	M12	L16	1	1	0.842	-54.972	19.05
51252	FAM178B	S162	M1	L2	0.95	0.987	0.975	-21.533	-96.976
121006	FAM186A	S15	M14	L1	0.706	0.864	0.911	13.465	24.499
10712	FAM189B	S800	M465	L12	0.895	0.672	0.41	-94.015	-14.411
285550	FAM200B	S31	M1	L2	0.721	0.99	0.975	-26.224	-92.354
85395	FAM207A	S318	M272	L128	1	0.985	0.565	3.445	-17.376
125228	FAM210A	S387	M150	L1	0.99	0.85	0.73	-10.973	82.535
26017	FAM32A	S40	M58	L21	0.985	0.99	0.67	-28.195	38.494
9130	FAM50A	S55	M34	L19	1	1	0.582	-10.974	3.791
83723	FAM57B	S639	M475	L1	0.835	0.437	0.606	12.415	55.54
388650	DIPK1A	S339	M299	L24	0.985	0.87	0.186	-22.531	18.419
286077	FAM83H	S882	M51	L59	0.745	1	0.97	47.72	83.439
2175	FANCA	S32	M36	L42	1	1	1	83.055	73.198
2176	FANCC	S32	M36	L42	1	1	1	81.576	74.217
2177	FANCD2	S32	M36	L42	1	1	1	84.189	75.651
2188	FANCF	S32	M36	L42	1	1	1	82.377	73.536
2189	FANCG	S32	M36	L42	1	1	1	83.599	73.86
55215	FANCI	S32	M36	L42	1	1	1	84.321	74.903
55120	FANCL	S32	M36	L42	1	1	1	82.748	74.07
57697	FANCM	S32	M36	L42	0.935	0.965	0.965	80.479	72.954
10667	FARS2	S2	M3	L4	0.963	1	0.98	-66.761	-63.647
2193	FARSA	S174	M182	L1	0.986	0.894	0.869	-4.093	71.67
10056	FARSB	S35	M5	L1	0.755	0.964	0.99	12.414	81.817
2194	FASN	S175	M183	L156	1	1	1	40.847	-111.138
60493	FASTKD5	S601	M13	L8	0.985	0.704	0.98	-59.188	-109.961
2197	FAU	S78	M69	L84	0.951	0.929	0.19	-43.418	26.343
2091	FBL	S870	M1	L2	0.86	1	0.955	-6.578	-89.188
54751	FBLIM1	S271	M253	L39	1	0.995	0.795	-6.122	98.403
84467	FBN3	S929	M645	L5	0.554	0.434	0.506	54.484	41.768
54850	FBXL12	S667	M471	L2	0.785	0.741	0.653	-30.454	-62.992
80028	FBXL18	S3	M4	L1	1	1	0.983	29.762	52.441
80204	FBXO11	S521	M408	L85	1	0.71	0.796	-2.142	63.768
23014	FBXO21	S179	M187	L149	0.975	0.925	0.312	-41.16	43.575
54455	FBXO42	S748	M530	L305	1	0.995	0.692	86.217	-71.766
26271	FBXO5	S290	M48	L45	0.825	0.989	0.86	80.419	-21.843
25793	FBXO7	S187	M24	L13	0.4	0.51	0.77	-41.009	70.42
23291	FBXW11	S265	M246	L68	1	0.97	0.915	-60.296	-36.795
285231	FBXW12	S3	M4	L1	1	1	0.983	29.21	49.747
6468	FBXW4	S219	M2	L3	0.705	0.938	0.825	-5.472	-35.238
55294	FBXW7	S340	M300	L23	1	0.97	0.421	-8.895	-11.993
84261	FBXW9	S36	M50	L17	0.937	0.46	0.854	-81.878	19.449
2209	FCGR1A	S591	M438	L34	1	0.985	0.84	-108.448	-23.175
115548	FCHO2	S77	M103	L109	1	1	0.98	-56.251	-26.613
2222	FDFT1	S504	M414	L260	1	1	1	-92.291	-118.176
2224	FDPS	S504	M414	L260	1	1	1	-92.277	-118.356
2230	FDX1	S34	M53	L67	1	0.98	0.687	-8.228	-120.314
112812	FDX2	S200	M121	L9	1	0.515	0.459	-43.209	0.719
2232	FDXR	S209	M233	L89	0.96	0.608	0.196	-16.058	29.257
2235	FECH	S130	M154	L135	1	1	1	-23.65	-126.204
55527	FEM1A	S123	M6	L5	0.755	0.99	0.955	61.169	41.214
2237	FEN1	S726	M574	L79	1	0.575	0.955	31.246	107.999
55612	FERMT1	S141	M152	L9	0.99	0.98	0.464	-38.854	-7.545
10979	FERMT2	S13	M6	L5	0.655	1	0.955	64.056	37.366
2245	FGD1	S840	M535	L5	0.98	0.66	0.929	62.548	27.792
2260	FGFR1	S23	M20	L32	0.99	0.995	0.868	100.701	-4.414
11116	FGFR1OP	S604	M371	L231	1	1	0.94	-30.754	134.229
26127	FGFR1OP2	S241	M227	L5	1	0.96	0.841	44.97	32.442
2263	FGFR2	S457	M61	L43	0.8	1	0.892	42.366	112.738
2264	FGFR4	S218	M206	L162	0.995	0.94	0.421	85.309	-38.16
2271	FH	S225	M167	L7	1	0.995	0.44	0.64	-120.158
9158	FIBP	S479	M8	L10	0.945	0.841	0.943	-33.967	-37.937
9896	FIG4	S852	M539	L276	1	1	0.995	49.869	-124.799
63979	FIGNL1	S34	M53	L67	0.975	0.995	0.675	-2.731	-121.928
81608	FIP1L1	S442	M355	L16	0.995	0.495	0.292	-5.235	39.943
51024	FIS1	S194	M86	L9	0.99	0.925	0.579	-39.778	-0.939
2280	FKBP1A	S257	M147	L124	0.815	0.585	0.545	103.05	71.681
2288	FKBP4	S51	M80	L86	1	1	0.99	-116.464	28.34
23770	FKBP8	S275	M201	L17	0.63	0.684	0.771	-76.204	24.292
201163	FLCN	S75	M61	L43	1	1	1	43.085	118.773
2313	FLI1	S930	M646	L7	0	0	0.531	27.433	-116.611
2314	FLII	S305	M349	L189	0.98	0.62	0.364	-63.167	-11.689
10211	FLOT1	S31	M1	L2	0.744	0.99	0.975	-24.99	-95.174
2322	FLT3	S642	M624	L286	1	1	1	83.475	102.885
28982	FLVCR1	S793	M605	L10	1	0.74	0.6	-2.126	-114.184
84256	FLYWCH1	S561	M1	L2	0.827	0.965	0.975	-13.817	-64.451
2326	FMO1	S931	M6	L5	0	0.725	0.749	-17.833	53.409
23360	FNBP4	S5	M6	L5	0.948	0.965	0.914	55.197	22.167
64778	FNDC3B	S711	M6	L5	0.575	0.944	0.944	59.854	24.101
2339	FNTA	S672	M508	L329	1	1	0.94	-46.853	118.487
2342	FNTB	S672	M508	L329	1	1	0.94	-46.848	118.491
54914	FOCAD	S628	M84	L3	0.86	0.548	0.77	-4.481	-50.566
2352	FOLR3	S758	M585	L299	1	0.92	0.581	54.787	16.732
8061	FOSL1	S45	M72	L63	1	0.915	0.455	-32.509	-16.333
2355	FOSL2	S285	M18	L17	0.605	0.913	0.821	62.523	-56.636
3169	FOXA1	S89	M2	L3	0.975	0.605	0.825	-12.135	-45.977
3170	FOXA2	S638	M266	L36	0.98	0.99	0.664	-17.198	75.515
3171	FOXA3	S550	M158	L150	0.635	0.574	0.368	-23.518	-13.833
2303	FOXC2	S932	M15	L18	0	0.94	0.663	-50.761	-7.138
2298	FOXD4	S156	M96	L1	0.69	0.573	0.894	18.495	23.418
653404	FOXD4L6	S885	M277	L116	1	0.84	0.588	-43.076	17.033
221937	FOXK1	S518	M424	L244	1	1	0.92	113.226	-16.771
668	FOXL2	S753	M480	L2	0.9	0.879	0.377	-8.335	-61.116
2305	FOXM1	S143	M48	L45	1	0.96	0.853	81.744	-16.73
8456	FOXN1	S86	M95	L14	0.814	0.579	0.626	43.877	-57.954
121643	FOXN4	S44	M29	L24	0.625	0.685	0.606	-32.189	21.919
2308	FOXO1	S153	M5	L1	0.515	0.343	0.646	69.818	46.744
55572	FOXRED1	S4	M7	L8	0.955	1	0.985	-68.117	-94.27
2356	FPGS	S79	M16	L7	0.925	0.995	1	11.566	-122.452
23401	FRAT2	S156	M96	L1	0.825	0.704	0.75	17.306	21.324
448831	FRG2	S522	M427	L241	0.985	0.915	0.522	40.502	73.648
100288801	FRG2C	S29	M19	L14	1	1	0.843	40.834	-52.461
10818	FRS2	S23	M20	L32	0.99	0.995	0.868	101.204	-4.455
84075	FSCB	S1	M1	L2	0.959	1	0.975	-15.885	-81.792
10468	FST	S720	M547	L317	1	0.995	0.65	50.559	-102.814
10841	FTCD	S103	M2	L3	0.9	0.64	0.825	-10.333	-39.013
2495	FTH1	S758	M585	L299	1	0.92	0.581	54.822	16.687
94033	FTMT	S197	M164	L93	0.925	0.91	0.533	-2.294	46.823
117246	FTSJ3	S24	M9	L11	1	0.97	0.553	40.08	1.857
8880	FUBP1	S200	M121	L9	1	0.515	0.459	-42.709	0.912
5045	FURIN	S50	M40	L26	1	1	0.899	91.177	0.238
2521	FUS	S247	M230	L181	0.98	0.915	0.495	60.524	12.751
2524	FUT2	S579	M435	L38	0.995	0.975	0.596	76.883	12.757
2395	FXN	S240	M204	L89	0.995	0.955	0.526	-13.821	22.877
7855	FZD5	S30	M45	L56	1	1	1	17.368	132.131
51343	FZR1	S67	M49	L6	1	1	0.436	36.939	-21.825
2539	G6PD	S572	M432	L91	1	1	0.843	97.338	81.384
2549	GAB1	S256	M20	L32	0.955	0.977	0.797	64.965	16.47
9846	GAB2	S277	M247	L10	0.99	0.945	0.962	-42.748	-49.019
2553	GABPB1	S48	M77	L82	0.765	0.84	0.859	32.865	36.629
126626	GABPB2	S16	M10	L12	0.56	0.98	0.905	-103.069	-5.745
4616	GADD45B	S580	M451	L256	1	1	0.96	-93.399	74.244
2580	GAK	S117	M120	L87	1	1	0.835	91.178	-12.478
2582	GALE	S199	M184	L158	1	0.53	0.42	3.16	-114.724
2584	GALK1	S884	M99	L96	0.92	0.526	0.404	-35.257	82.13
85569	GALP	S3	M4	L1	0.827	0.995	0.983	24.185	46.329
23193	GANAB	S725	M528	L322	1	1	0.92	-96.298	21.323
2597	GAPDH	S44	M29	L24	0.98	0.985	0.874	-31.476	19.595
54433	GAR1	S14	M1	L2	0.91	0.99	0.975	-3.801	-83.413
2617	GARS	S57	M35	L1	0.47	0.555	0.907	25.844	30.928
2618	GART	S79	M16	L7	0.925	0.995	1	12.246	-124.067
2619	GAS1	S477	M1	L2	0.431	0.846	0.975	-2.024	-88.998
246176	GAS2L2	S29	M19	L14	0.988	1	0.843	44.603	-51.969
2625	GATA3	S413	M336	L95	0.995	0.865	0.423	-23.443	101.12
2627	GATA6	S785	M600	L74	1	0.905	0.893	47.216	61.872
57798	GATAD1	S216	M124	L111	1	0.99	0.93	-39.071	94.849
54815	GATAD2A	S261	M242	L172	1	0.985	0.723	-14.835	57.582
57459	GATAD2B	S261	M242	L172	1	0.985	0.723	-14.722	58.421
5188	GATB	S319	M3	L4	0.94	0.96	0.98	-64.438	-66.695
8729	GBF1	S700	M34	L19	0.96	0.915	0.529	42.046	-20.211
2729	GCLC	S68	M28	L7	1	0.975	0.931	19.479	-119.922
10985	GCN1	S267	M137	L125	1	1	0.905	-126.889	15.443
145781	GCOM1	S529	M433	L239	1	0.93	0.675	-44.074	-92.171
2653	GCSH	S34	M53	L67	1	0.98	0.687	-8.947	-122.037
2665	GDI2	S648	M102	L99	0.48	0.776	0.591	50.836	12.593
8487	GEMIN2	S193	M71	L1	0.548	0.426	0.821	17.114	69.651
50628	GEMIN4	S427	M24	L13	0.929	0.378	0.51	-39.793	75.477
25929	GEMIN5	S69	M46	L1	0.945	0.93	0.359	36.759	-15.618
79833	GEMIN6	S767	M4	L1	0.47	0.901	0.983	35.986	50.109
79760	GEMIN7	S767	M4	L1	0.47	0.901	0.983	36.085	49.353
2672	GFI1	S278	M200	L90	0.98	0.965	0.394	-57.773	-19.128
85476	GFM1	S750	M3	L4	0.652	0.957	0.98	-73.003	-63.632
84340	GFM2	S822	M3	L4	0.825	0.974	0.98	-73.186	-75.838
2673	GFPT1	S199	M184	L158	1	0.53	0.42	4.345	-115.453
2677	GGCX	S231	M205	L1	1	0.91	0.589	24.467	73.928
9453	GGPS1	S824	M129	L98	0.635	0.903	0.528	-21.816	-7.07
2678	GGT1	S659	M559	L28	1	0.995	0.377	112.882	-36.356
91227	GGTLC2	S651	M5	L1	0.51	0.984	0.99	5.054	75.063
26058	GIGYF2	S836	M505	L282	1	1	0.744	-121.034	56.432
9837	GINS1	S136	M30	L6	0.919	0.968	0.409	18.321	-12.676
51659	GINS2	S136	M30	L6	0.919	0.968	0.409	18.33	-12.496
64785	GINS3	S933	M219	L3	0.92	0.485	0.8	7.895	-25.781
84296	GINS4	S747	M587	L1	1	0.87	0.355	-57.786	49.556
2700	GJA3	S15	M14	L1	1	0.945	0.926	13.826	31.329
10052	GJC1	S625	M4	L1	0.792	0.39	0.805	39.073	39.531
219770	GJD4	S577	M112	L114	0.67	0.952	0.824	62.154	77.325
2733	GLE1	S54	M70	L80	1	0.98	0.578	53.303	-10.844
2735	GLI1	S333	M38	L15	0.495	1	0.71	-88.544	-36.049
2738	GLI4	S137	M51	L59	1	1	0.97	48.83	81.631
256710	GLIPR1L1	S1	M1	L2	0.98	1	0.975	-19.128	-81.978
11146	GLMN	S135	M153	L94	0.984	0.974	0.782	57.659	5.684
10539	GLRX3	S317	M114	L64	1	0.985	0.662	30.063	96.251
2744	GLS	S34	M53	L67	0.975	0.995	0.675	-3.938	-123.682
2752	GLUL	S538	M450	L52	0.97	0.825	0.586	-121.205	10.773
389396	GLYATL3	S1	M1	L2	0.934	1	0.975	-19.255	-83.611
51053	GMNN	S290	M48	L45	0.82	0.983	0.86	79.203	-21.345
8833	GMPS	S43	M16	L7	1	1	1	6.627	-126.944
2771	GNAI2	S181	M130	L18	1	0.655	0.456	-97.024	9.358
2773	GNAI3	S181	M130	L18	1	0.655	0.456	-96.745	8.834
2776	GNAQ	S93	M123	L120	1	1	0.995	24.694	-90.938
2782	GNB1	S5	M6	L5	1	0.995	0.949	53.552	33.891
54584	GNB1L	S564	M437	L55	0.975	0.74	0.624	-15.838	21.081
2783	GNB2	S109	M157	L5	0.985	0.904	0.543	51.665	35.541
2784	GNB3	S297	M73	L88	1	0.93	0.644	-65.913	46.118
51764	GNG13	S372	M303	L75	0.955	0.775	0.624	65.334	-6.019
2785	GNG3	S74	M8	L10	0.885	0.99	0.97	-46.862	-39.343
2787	GNG5	S278	M200	L90	0.775	0.79	0.525	-58.767	-18.688
2794	GNL1	S40	M58	L21	1	0.99	0.67	-31.976	41.318
29889	GNL2	S100	M118	L122	1	0.98	0.388	76.134	-32.327
26354	GNL3	S643	M9	L11	0.855	0.724	0.445	-18.326	47.697
54552	GNL3L	S59	M81	L19	1	0.995	0.242	-1.711	-1.196
64841	GNPNAT1	S199	M184	L158	1	0.53	0.42	4.757	-116.059
2801	GOLGA2	S73	M83	L25	1	0.99	0.631	7.833	58.633
342096	GOLGA6A	S57	M35	L1	0.632	0.568	0.966	20.711	34.896
55889	GOLGA6B	S139	M145	L2	1	0.726	0.975	5.398	-73.104
653643	GOLGA6D	S9	M1	L2	0.985	0.993	0.97	-20.379	-65.663
55204	GOLPH3L	S287	M127	L92	1	0.941	0.63	-32.353	-105.691
51026	GOLT1B	S443	M357	L112	1	0.965	0.592	-84.609	91.223
54856	GON4L	S516	M4	L1	0.89	0.947	0.983	32.526	58.236
9570	GOSR2	S7	M5	L1	0.977	0.995	0.99	0.193	76.017
2806	GOT2	S34	M53	L67	1	1	0.693	-5.749	-121.655
8733	GPAA1	S221	M42	L41	0.8	0.864	0.851	-5.189	57.382
55094	GPATCH1	S99	M116	L37	1	0.98	0.853	92.091	-30.551
63906	GPATCH3	S552	M31	L1	0.96	0.549	0.836	45.906	43.27
54865	GPATCH4	S567	M390	L21	0.905	0.545	0.649	-27.905	42.226
2821	GPI	S163	M29	L24	0.61	0.949	0.853	-28.044	21.795
338328	GPIHBP1	S377	M51	L59	0.995	0.992	0.765	19.694	98.721
27238	GPKOW	S55	M34	L19	1	1	0.582	-10.656	3.025
11321	GPN1	S7	M5	L1	0.97	0.995	0.99	1.296	78.312
54707	GPN2	S3	M4	L1	1	1	0.983	24.305	54.785
51184	GPN3	S208	M30	L6	0.785	0.87	0.44	13.858	-12.78
56927	GPR108	S1	M1	L2	0.854	1	0.975	-16.253	-86.999
56834	GPR137	S632	M470	L10	0.69	0.503	0.521	-37.605	-27.996
387509	GPR153	S545	M441	L183	1	0.995	0.94	-51.543	113.865
440435	GPR179	S556	M463	L14	0.875	0.77	0.801	44.619	-47.648
2857	GPR34	S775	M499	L15	1	0.71	0.522	-80.422	-28.434
11250	GPR45	S636	M472	L3	0.82	0.589	0.579	-21.414	-27.512
83873	GPR61	S33	M33	L34	1	1	0.965	-106.984	-29.13
53831	GPR84	S61	M88	L71	1	1	0.87	-73.137	-44.665
2873	GPS1	S20	M32	L29	0.6	0.965	0.633	27.331	-33.751
2877	GPX2	S158	M168	L14	0.965	0.605	0.503	-1.745	27.634
2879	GPX4	S154	M163	L91	1	1	0.99	100.233	86.932
493869	GPX8	S934	M83	L25	0.475	0.705	0.477	5.413	64.054
9402	GRAP2	S935	M647	L28	0.863	0.43	0.267	38.258	-29.966
160622	GRASP	S333	M38	L15	0.495	1	0.71	-88.195	-36.679
2885	GRB2	S256	M20	L32	0.955	0.977	0.797	65.055	17.374
79977	GRHL2	S141	M152	L9	0.985	0.97	0.469	-38.714	-11.358
156	GRK2	S74	M8	L10	0.854	0.995	0.96	-48.509	-38.19
157	GRK3	S90	M87	L81	1	0.99	0.925	10.438	-101.723
2913	GRM3	S90	M87	L81	1	0.99	0.925	10.564	-100.963
80273	GRPEL1	S1	M1	L2	0.449	0.974	0.975	-9.305	-71.609
2926	GRSF1	S347	M307	L4	0.995	0.74	0.975	-75.926	-81.215
83743	GRWD1	S587	M4	L1	0.975	0.829	0.983	27.494	61.482
79792	GSDMD	S289	M236	L2	0.975	0.71	0.948	4.582	-67.978
2932	GSK3B	S936	M648	L68	0	0.519	0.518	-67.064	-55.174
2935	GSPT1	S94	M1	L2	0.845	0.97	0.975	-3.191	-76.753
2947	GSTM3	S33	M33	L34	1	1	0.965	-109.083	-27.897
2948	GSTM4	S471	M33	L34	1	0.685	0.934	-111.818	-30.105
2950	GSTP1	S6	M8	L10	1	1	0.97	-38.932	-38.054
2957	GTF2A1	S633	M501	L50	0.965	0.48	0.584	-51.84	127.249
2958	GTF2A2	S188	M5	L1	0.824	0.961	0.99	6.843	88.075
2959	GTF2B	S511	M444	L1	0.88	0.495	0.404	-30.974	72.291
2960	GTF2E1	S427	M24	L13	0.895	0.445	0.681	-41.037	74.202
2961	GTF2E2	S351	M312	L195	1	0.985	0.607	-77.542	38.439
2962	GTF2F1	S351	M312	L195	1	0.985	0.607	-77.482	38.051
2963	GTF2F2	S883	M266	L36	1	0.457	0.626	-14.413	76.411
2965	GTF2H1	S760	M551	L1	0.965	0.56	0.467	22.046	36.05
2966	GTF2H2	S186	M181	L20	1	0.96	0.746	90.481	25.409
2967	GTF2H3	S760	M551	L1	0.965	0.56	0.467	22.35	36.373
2968	GTF2H4	S258	M241	L165	1	0.995	0.814	-58.953	94.323
404672	GTF2H5	S445	M366	L268	1	0.99	0.47	-24.787	76.883
2969	GTF2I	S259	M30	L6	0.985	0.727	0.398	13.926	-16.747
2971	GTF3A	S119	M142	L136	0.995	0.955	0.826	-57.836	69.372
2975	GTF3C1	S378	M105	L55	1	1	0.601	66.183	-45.23
2976	GTF3C2	S378	M105	L55	1	1	0.601	65.871	-45.952
9330	GTF3C3	S292	M105	L55	1	0.975	0.812	67.326	-48.351
9329	GTF3C4	S292	M105	L55	1	0.975	0.812	68.138	-47.281
9328	GTF3C5	S292	M105	L55	1	0.975	0.812	68.179	-48.051
112495	GTF3C6	S292	M105	L55	1	0.975	0.812	68.267	-48.372
9567	GTPBP1	S25	M27	L28	0.989	0.969	0.843	-77.191	-7.47
85865	GTPBP10	S128	M3	L4	0.945	0.959	0.98	-70.719	-78.243
23560	GTPBP4	S157	M78	L76	1	0.99	0.497	-23.509	49.482
29083	GTPBP8	S128	M3	L4	0.945	0.959	0.98	-69.313	-77.947
51512	GTSE1	S117	M120	L87	1	1	0.835	91.549	-13.118
2980	GUCA2A	S252	M235	L184	0.82	0.741	0.549	-41.965	40.874
2987	GUK1	S824	M129	L98	0.635	0.903	0.528	-21.778	-7.27
3002	GZMB	S650	M52	L60	0.66	0.822	0.557	-1.018	18.545
2999	GZMH	S512	M422	L10	0.97	0.68	0.89	-43.375	-29.672
94239	H2AFV	S12	M2	L3	1	0.505	0.825	-1.479	-44.689
3014	H2AFX	S235	M43	L20	1	0.985	0.633	-64.113	64.018
3015	H2AFZ	S92	M62	L23	1	0.995	0.75	60.179	-37.757
3020	H3F3A	S666	M490	L1	0.94	0.63	0.906	26.521	65.827
3021	H3F3B	S158	M168	L14	0.947	0.625	0.456	-2.941	26.333
440093	H3F3C	S937	M342	L1	0	0.415	0.6	10.517	66.52
23498	HAAO	S11	M2	L3	0.429	0.915	0.825	8.743	-36.05
201562	HACD2	S31	M1	L2	0.444	1	0.975	-20.095	-90.73
3030	HADHA	S272	M9	L11	0.889	0.776	0.505	-0.262	43.995
57817	HAMP	S57	M35	L1	0.757	0.578	0.927	22.075	31.2
9001	HAP1	S370	M19	L14	0.925	0.813	0.727	48.993	-52.878
60484	HAPLN2	S64	M10	L12	0.995	0.919	0.895	-97.485	-8.735
3035	HARS	S330	M5	L1	0.98	0.982	0.99	1.935	73.324
23438	HARS2	S2	M3	L4	0.99	1	0.98	-79.778	-67.238
115106	HAUS1	S534	M434	L262	1	0.98	0.764	16.717	109.803
55142	HAUS2	S139	M145	L2	1	0.726	0.975	5.371	-71.981
79441	HAUS3	S139	M145	L2	1	0.726	0.975	5.981	-71.459
54801	HAUS6	S139	M145	L2	1	0.726	0.975	6.442	-70.828
10456	HAX1	S16	M10	L12	0.684	0.746	0.683	-106.17	-13.03
10767	HBS1L	S386	M329	L188	1	0.995	0.914	-31.614	-26.144
3052	HCCS	S10	M13	L8	1	0.725	0.98	-58.65	-104.299
3054	HCFC1	S59	M81	L19	0.975	0.98	0.238	-5.83	0.253
610	HCN2	S71	M100	L110	1	1	1	9.803	127.256
3061	HCRTR1	S47	M4	L1	0.85	0.958	0.975	15.786	44.853
3065	HDAC1	S740	M497	L1	1	0.94	0.536	7.672	21.193
8841	HDAC3	S62	M85	L69	1	1	0.95	89.202	-48.733
9759	HDAC4	S746	M290	L205	1	0.993	0.928	94.122	-97.606
51564	HDAC7	S595	M306	L3	1	0.92	0.422	10.616	-48.019
55869	HDAC8	S296	M93	L97	0.945	0.784	0.71	65.056	-22.492
154150	HDGFL1	S350	M43	L20	0.82	0.992	0.45	106.51	42.867
84717	HDGFL2	S150	M132	L15	0.907	0.931	0.47	-87.267	-23.334
139324	HDX	S89	M2	L3	0.975	0.605	0.825	-11.344	-45.991
55127	HEATR1	S299	M257	L16	0.698	0.578	0.361	-45.851	21.983
55027	HEATR3	S9	M1	L2	0.5	0.986	0.975	-16.891	-66.899
63897	HEATR6	S29	M19	L14	0.7	0.83	0.685	-5.971	20.764
25831	HECTD1	S526	M97	L83	0.99	0.985	0.817	45.007	-75.305
9931	HELZ	S148	M128	L3	0.445	0.785	0.592	20.502	-60.685
8924	HERC2	S662	M503	L64	1	0.91	0.637	-9.313	111.468
9709	HERPUD1	S63	M75	L50	0.796	0.826	0.778	102.202	18.646
3280	HES1	S722	M493	L301	0.995	0.645	0.578	-41.927	-21.868
390992	HES3	S271	M253	L39	1	0.995	0.795	-5.109	98.915
[truncated: 2,843 more rows]

## Sheet: S20_C80
EntrezID	GeneSymbol	Cluster_Small	Cluster_Medium	Cluster_Large	Prob_Small	Prob_Medium	Prob_Large	tSNE_x	tSNE_y
[truncated: 4,271 more rows]

[truncated: 1 more sheets: CRISPR]
