# Supplementary material for: shinyDepMap, a tool to identify targetable cancer genes and their functional connections from Cancer Dependency Map data
Source: eLife. 2021 Feb 8;10:e57116. doi: 10.7554/eLife.57116 (PMC7924953; doi:10.7554/eLife.57116)
Supplement: Figure 5—source data 2. — Clusters that contain 15 genes or more are only considered in this analysis. [file elife-57116-fig5-data2.xlsx]

## Sheet: cluster_pathway_enrichment_v3_1
Score	Cluster	# Genes	Pathway	-logP
0:100 (shRNA)	L1	486	GO_RIBOSOMAL_SUBUNIT	62.0015
0:100 (shRNA)	L2	518	REACTOME_REGULATION_OF_EXPRESSION_OF_SLITS_AND_ROBOS	23.2184
0:100 (shRNA)	L3	412	GO_PROTEIN_SERINE_THREONINE_KINASE_ACTIVITY	7.2063
0:100 (shRNA)	L4	234	GO_NUCLEOTIDE_EXCISION_REPAIR_DNA_DAMAGE_RECOGNITION	9.04541
0:100 (shRNA)	L5	137	REACTOME_NCAM_SIGNALING_FOR_NEURITE_OUT_GROWTH	3.67838
0:100 (shRNA)	L6	118	GO_CATALYTIC_ACTIVITY_ACTING_ON_RNA	18.8394
0:100 (shRNA)	L7	79	GO_OLFACTORY_RECEPTOR_ACTIVITY	4.54411
0:100 (shRNA)	L8	74	GO_NCRNA_PROCESSING	8.17665
0:100 (shRNA)	L9	76	GO_CELL_SUBSTRATE_JUNCTION	14.4026
0:100 (shRNA)	L10	70	GO_MEDIATOR_COMPLEX	21.4243
0:100 (shRNA)	L11	49	GO_RIBOSOME_BIOGENESIS	24.3464
0:100 (shRNA)	L12	43	GO_DNA_REPLICATION	17.3332
0:100 (shRNA)	L13	34	REACTOME_DNA_REPLICATION	6.51569
0:100 (shRNA)	L14	32	REACTOME_DOWNSTREAM_SIGNALING_OF_ACTIVATED_FGFR3	6.73524
0:100 (shRNA)	L15	29	HALLMARK_OXIDATIVE_PHOSPHORYLATION	24.6708
0:100 (shRNA)	L16	28	GO_EPHRIN_RECEPTOR_ACTIVITY	3.28722
0:100 (shRNA)	L17	17	REACTOME_NUCLEOBASE_BIOSYNTHESIS	11.5102
0:100 (shRNA)	L18	17	GO_HISTONE_H4_K5_ACETYLATION	8.79594
0:100 (shRNA)	L19	16	GO_PROTEIN_SERINE_THREONINE_PHOSPHATASE_COMPLEX	7.04916
0:100 (shRNA)	L20	16	GO_IRON_ION_TRANSPORT	15.0191
0:100 (shRNA)	L21	16	GO_MRNA_METABOLIC_PROCESS	9.48687
20:80	L1	550	REACTOME_PROCESSING_OF_CAPPED_INTRON_CONTAINING_PRE_MRNA	21.3224
20:80	L2	483	REACTOME_RRNA_PROCESSING_IN_THE_NUCLEUS_AND_CYTOSOL	31.5166
20:80	L3	505	GO_RIBOSOME_BIOGENESIS	19.1281
20:80	L4	322	GO_DNA_INTEGRITY_CHECKPOINT	6.02821
20:80	L5	248	GO_TRNA_METABOLIC_PROCESS	21.4378
20:80	L6	233	GO_PEROXISOMAL_MEMBRANE_TRANSPORT	3.81596
20:80	L7	179	GO_TRANSLATIONAL_ELONGATION	13.5148
20:80	L8	174	GO_MITOCHONDRIAL_PROTEIN_COMPLEX	145.557
20:80	L9	100	GO_OLFACTORY_RECEPTOR_ACTIVITY	4.79157
20:80	L10	110	REACTOME_SIGNALING_BY_VEGF	15.1297
20:80	L11	57	GO_DNA_REPLICATION_ORIGIN_BINDING	8.68962
20:80	L12	55	GO_CATALYTIC_ACTIVITY_ACTING_ON_DNA	4.46582
20:80	L13	49	GO_MEDIATOR_COMPLEX	38.9666
20:80	L14	41	GO_NEGATIVE_REGULATION_OF_TELOMERE_MAINTENANCE_VIA_TELOMERE_LENGTHENING	8.39053
20:80	L15	37	KEGG_OOCYTE_MEIOSIS	3.83577
20:80	L16	38	REACTOME_NUCLEOBASE_BIOSYNTHESIS	20.0727
20:80	L17	35	GO_REGULATION_OF_PROTEIN_LOCALIZATION_TO_MEMBRANE	8.36043
20:80	L18	30	GO_MRNA_METABOLIC_PROCESS	22.6564
20:80	L19	26	GO_MITOTIC_NUCLEAR_DIVISION	14.3548
20:80	L20	24	GO_ANTIGEN_RECEPTOR_MEDIATED_SIGNALING_PATHWAY	8.86079
20:80	L21	25	REACTOME_DNA_REPLICATION_PRE_INITIATION	8.41309
20:80	L22	25	GO_COPI_COATED_VESICLE_MEMBRANE	10.4161
20:80	L23	24	GO_TOR_SIGNALING	20.058
20:80	L24	24	GO_MICROTUBULE_PLUS_END	3.58477
20:80	L25	23	REACTOME_HOMOLOGOUS_DNA_PAIRING_AND_STRAND_EXCHANGE	17.5347
20:80	L26	22	GO_EPHRIN_RECEPTOR_ACTIVITY	3.49923
20:80	L27	21	REACTOME_ACTIVATION_OF_THE_MRNA_UPON_BINDING_OF_THE_CAP_BINDING_COMPLEX_AND_EIFS_AND_SUBSEQUENT_BINDING_TO_43S	12.1396
20:80	L28	19	KEGG_ENDOCYTOSIS	12.5898
20:80	L29	17	REACTOME_DNA_REPLICATION	12.4205
20:80	L30	17	GO_SISTER_CHROMATID_COHESION	10.9429
20:80	L32	15	GO_MESODERM_MORPHOGENESIS	2.69199
20:80	L33	15	REACTOME_CHROMATIN_ORGANIZATION	12.3134
20:80	L34	15	REACTOME_CHROMATIN_ORGANIZATION	16.4337
40:60	L1	637	GO_RIBOSOME_BIOGENESIS	21.4321
40:60	L2	437	REACTOME_RRNA_PROCESSING_IN_THE_NUCLEUS_AND_CYTOSOL	32.4445
40:60	L3	457	REACTOME_PROCESSING_OF_CAPPED_INTRON_CONTAINING_PRE_MRNA	29.6871
40:60	L4	265	GO_CATALYTIC_ACTIVITY_ACTING_ON_RNA	14.1275
40:60	L5	247	GO_NCRNA_PROCESSING	11.228
40:60	L6	164	GO_MITOCHONDRIAL_GENE_EXPRESSION	165.905
40:60	L7	152	GO_NBAF_COMPLEX	10.2069
40:60	L8	140	GO_CELL_JUNCTION_ASSEMBLY	13.7144
40:60	L9	97	HALLMARK_APICAL_JUNCTION	9.49163
40:60	L10	67	REACTOME_G_ALPHA_S_SIGNALLING_EVENTS	3.2819
40:60	L11	72	REACTOME_NUCLEOBASE_BIOSYNTHESIS	25.5322
40:60	L12	68	REACTOME_RESPIRATORY_ELECTRON_TRANSPORT	100.602
40:60	L13	48	REACTOME_MITOTIC_G1_G1_S_PHASES	15.1671
40:60	L14	43	REACTOME_DNA_REPLICATION	8.72227
40:60	L15	41	GO_MEDIATOR_COMPLEX	27.3432
40:60	L16	31	REACTOME_INHIBITION_OF_THE_PROTEOLYTIC_ACTIVITY_OF_APC_C_REQUIRED_FOR_THE_ONSET_OF_ANAPHASE_BY_MITOTIC_SPINDLE_CHECKPOINT_COMPONENTS	5.10606
40:60	L17	31	GO_NUCLEAR_HETEROCHROMATIN	8.2593
40:60	L18	29	REACTOME_DNA_STRAND_ELONGATION	15.375
40:60	L19	28	REACTOME_UB_SPECIFIC_PROCESSING_PROTEASES	7.27367
40:60	L20	25	GO_ATPASE_REGULATOR_ACTIVITY	2.78008
40:60	L21	27	REACTOME_HOMOLOGOUS_DNA_PAIRING_AND_STRAND_EXCHANGE	24.2459
40:60	L22	25	BIOCARTA_PPARA_PATHWAY	4.07816
40:60	L23	24	KEGG_GLYCOSAMINOGLYCAN_BIOSYNTHESIS_HEPARAN_SULFATE	17.0366
40:60	L24	22	GO_MITOCHONDRIAL_MATRIX	12.8698
40:60	L25	21	GO_SYNAPTIC_VESICLE_MEMBRANE	3.59019
40:60	L26	20	BIOCARTA_NFKB_PATHWAY	12.9974
40:60	L27	18	GO_INSULIN_RECEPTOR_BINDING	5.77228
40:60	L28	19	KEGG_ENDOCYTOSIS	14.5443
40:60	L29	18	GO_SPLICEOSOMAL_COMPLEX	4.45
40:60	L30	19	GO_TOR_SIGNALING	17.0599
40:60	L31	18	GO_RNA_SPLICING_VIA_TRANSESTERIFICATION_REACTIONS	5.94776
40:60	L32	18	GO_TRANSMEMBRANE_RECEPTOR_PROTEIN_KINASE_ACTIVITY	3.98376
40:60	L33	18	GO_SAGA_TYPE_COMPLEX	15.7648
40:60	L34	17	GO_H4_H2A_HISTONE_ACETYLTRANSFERASE_COMPLEX	11.0558
40:60	L35	16	GO_MITOCHONDRIAL_PROTEIN_COMPLEX	5.54264
40:60	L36	16	GO_HISTONE_H4_K5_ACETYLATION	8.91219
40:60	L37	16	REACTOME_RNA_POLYMERASE_I_TRANSCRIPTION_INITIATION	4.8181
40:60	L38	16	GO_REGULATION_OF_CELL_CYCLE_PHASE_TRANSITION	10.0699
40:60	L39	16	REACTOME_EXTENSION_OF_TELOMERES	27.3102
40:60	L40	15	GO_ANAPHASE_PROMOTING_COMPLEX	16.9867
60:40	L1	492	GO_NCRNA_METABOLIC_PROCESS	23.8087
60:40	L2	243	REACTOME_RRNA_PROCESSING_IN_THE_NUCLEUS_AND_CYTOSOL	37.8986
60:40	L3	239	REACTOME_PROCESSING_OF_CAPPED_INTRON_CONTAINING_PRE_MRNA	35.3265
60:40	L4	148	GO_MITOCHONDRIAL_GENE_EXPRESSION	178.037
60:40	L5	107	KEGG_FOCAL_ADHESION	17.2391
60:40	L6	88	REACTOME_MRNA_SPLICING	33.6595
60:40	L7	87	REACTOME_NUCLEOBASE_BIOSYNTHESIS	24.471
60:40	L8	85	REACTOME_RESPIRATORY_ELECTRON_TRANSPORT	125.119
60:40	L9	76	GO_POSITIVE_REGULATION_OF_CELLULAR_PROTEIN_LOCALIZATION	9.51886
60:40	L10	68	HALLMARK_CHOLESTEROL_HOMEOSTASIS	3.55406
60:40	L11	47	GO_RIBOSOME_BIOGENESIS	13.7617
60:40	L12	45	GO_RHO_GTPASE_BINDING	2.87088
60:40	L13	45	GO_MEDIATOR_COMPLEX	61.0484
60:40	L14	42	GO_SYNAPTONEMAL_COMPLEX_ORGANIZATION	3.03803
60:40	L15	41	GO_VITAMIN_BIOSYNTHETIC_PROCESS	4.53586
60:40	L16	38	GO_TRANSCRIPTION_BY_RNA_POLYMERASE_I	8.16289
60:40	L17	40	GO_SPERM_PART	4.1133
60:40	L18	37	GO_P53_BINDING	4.72784
60:40	L19	33	GO_SPLICEOSOMAL_COMPLEX	7.29822
60:40	L20	32	REACTOME_HOMOLOGY_DIRECTED_REPAIR	26.8597
60:40	L21	30	GO_RIBOSOME_BIOGENESIS	17.024
60:40	L22	30	KEGG_PROTEASOME	9.69754
60:40	L23	29	GO_COVALENT_CHROMATIN_MODIFICATION	18.7
60:40	L24	27	GO_GLYCOLYTIC_PROCESS_THROUGH_FRUCTOSE_6_PHOSPHATE	18.8221
60:40	L25	23	REACTOME_SPHINGOLIPID_DE_NOVO_BIOSYNTHESIS	10.5955
60:40	L26	26	GO_PROTEIN_N_LINKED_GLYCOSYLATION	10.6291
60:40	L27	24	GO_PROTEIN_DEPHOSPHORYLATION	12.5629
60:40	L28	24	GO_CELLULAR_MODIFIED_AMINO_ACID_CATABOLIC_PROCESS	3.24535
60:40	L29	21	GO_NUCLEOTIDE_EXCISION_REPAIR_DNA_DAMAGE_RECOGNITION	20.8189
60:40	L30	22	REACTOME_DNA_METHYLATION	41.7797
60:40	L31	21	REACTOME_DNA_STRAND_ELONGATION	16.6946
60:40	L32	21	KEGG_GLYCOSAMINOGLYCAN_BIOSYNTHESIS_HEPARAN_SULFATE	17.5933
60:40	L33	20	GO_GOLGI_VESICLE_TRANSPORT	16.7578
60:40	L34	19	GO_POTASSIUM_ION_EXPORT_ACROSS_PLASMA_MEMBRANE	3.79141
60:40	L35	19	REACTOME_FORMATION_OF_ATP_BY_CHEMIOSMOTIC_COUPLING	33.4101
60:40	L36	19	REACTOME_MITOTIC_PROMETAPHASE	5.64602
60:40	L37	16	GO_CATALYTIC_STEP_2_SPLICEOSOME	9.87416
60:40	L38	17	REACTOME_UB_SPECIFIC_PROCESSING_PROTEASES	5.71419
60:40	L39	17	REACTOME_TP53_REGULATES_TRANSCRIPTION_OF_GENES_INVOLVED_IN_G2_CELL_CYCLE_ARREST	3.72774
60:40	L40	17	REACTOME_CHROMATIN_ORGANIZATION	17.571
60:40	L41	17	GO_GPI_ANCHOR_BIOSYNTHETIC_PROCESS	12.8337
60:40	L42	17	GO_INTERSTRAND_CROSS_LINK_REPAIR	33.0899
60:40	L43	17	GO_VACUOLAR_MEMBRANE	15.6695
60:40	L44	17	GO_CHROMOSOME_CENTROMERIC_REGION	15.1358
60:40	L45	16	REACTOME_MITOTIC_G1_G1_S_PHASES	12.0578
60:40	L46	15	GO_OUTER_MEMBRANE	4.53248
60:40	L47	16	KEGG_ENDOCYTOSIS	11.4808
60:40	L48	15	KEGG_DNA_REPLICATION	12.3475
60:40	L49	15	GO_POSITIVE_REGULATION_OF_I_KAPPAB_KINASE_NF_KAPPAB_SIGNALING	7.97486
60:40	L50	15	GO_ENDOPLASMIC_RETICULUM_TO_CYTOSOL_TRANSPORT	19.2667
60:40	L51	15	GO_ARP2_3_COMPLEX_MEDIATED_ACTIN_NUCLEATION	24.3739
60:40	L52	15	GO_TELOMERIC_DNA_BINDING	7.40726
80:20	L1	326	REACTOME_REGULATION_OF_EXPRESSION_OF_SLITS_AND_ROBOS	71.1474
80:20	L2	143	GO_MITOCHONDRIAL_GENE_EXPRESSION	186.235
80:20	L3	89	GO_CELL_JUNCTION_ASSEMBLY	15.143
80:20	L4	82	REACTOME_PROTEIN_PROTEIN_INTERACTIONS_AT_SYNAPSES	4.20728
80:20	L5	75	ONCOGENIC_SIGNATURE_AKT_UP.V1_UP	2.93836
80:20	L6	70	REACTOME_RESPIRATORY_ELECTRON_TRANSPORT	90.8534
80:20	L7	64	GO_OLFACTORY_RECEPTOR_ACTIVITY	3.13069
80:20	L8	57	GO_PROXIMAL_DISTAL_PATTERN_FORMATION	3.64947
80:20	L9	60	REACTOME_NUCLEOBASE_BIOSYNTHESIS	26.5717
80:20	L10	57	GO_RIBOSOME_BIOGENESIS	42.0251
80:20	L11	55	GO_HYALURONIC_ACID_BINDING	2.60941
80:20	L12	43	GO_T_TUBULE	3.39293
80:20	L13	46	REACTOME_TRNA_PROCESSING	12.3005
80:20	L14	43	REACTOME_PROCESSING_OF_CAPPED_INTRON_CONTAINING_PRE_MRNA	6.55572
80:20	L15	43	REACTOME_SIGNALING_BY_MET	13.8281
80:20	L16	42	GO_SPERM_PART	2.92466
80:20	L17	39	GO_EXOCRINE_SYSTEM_DEVELOPMENT	3.68476
80:20	L18	36	GO_NEGATIVE_REGULATION_OF_CELL_CYCLE_PROCESS	5.06532
80:20	L19	37	GO_SNRNA_PROCESSING	10.812
80:20	L20	31	GO_O_GLYCAN_PROCESSING	3.84545
80:20	L21	32	GO_RIBOSOME_BIOGENESIS	18.2457
80:20	L22	33	REACTOME_SIGNALLING_TO_ERKS	4.32203
80:20	L23	31	GO_CATALYTIC_ACTIVITY_ACTING_ON_RNA	12.2213
80:20	L24	31	REACTOME_TRANSCRIPTIONAL_REGULATION_OF_WHITE_ADIPOCYTE_DIFFERENTIATION	19.2062
80:20	L25	31	KEGG_SYSTEMIC_LUPUS_ERYTHEMATOSUS	48.0193
80:20	L26	30	REACTOME_PHOSPHORYLATION_SITE_MUTANTS_OF_CTNNB1_ARE_NOT_TARGETED_TO_THE_PROTEASOME_BY_THE_DESTRUCTION_COMPLEX	3.38871
80:20	L27	28	REACTOME_HOST_INTERACTIONS_WITH_INFLUENZA_FACTORS	9.9597
80:20	L28	29	GO_MICROTUBULE_ORGANIZING_CENTER_PART	24.5431
80:20	L29	26	GO_DNA_BINDING_TRANSCRIPTION_REPRESSOR_ACTIVITY_RNA_POLYMERASE_II_SPECIFIC	4.39076
80:20	L30	22	REACTOME_METABOLISM_OF_VITAMINS_AND_COFACTORS	3.92582
80:20	L31	24	GO_OOCYTE_MATURATION	3.20627
80:20	L32	21	GO_CORNIFICATION	3.4158
80:20	L33	22	HALLMARK_OXIDATIVE_PHOSPHORYLATION	33.0018
80:20	L34	22	GO_MRNA_METABOLIC_PROCESS	12.2766
80:20	L35	22	GO_MRNA_METABOLIC_PROCESS	10.7494
80:20	L36	19	REACTOME_TRANSPORT_OF_MATURE_TRANSCRIPT_TO_CYTOPLASM	5.56549
80:20	L37	20	REACTOME_SRP_DEPENDENT_COTRANSLATIONAL_PROTEIN_TARGETING_TO_MEMBRANE	8.33497
80:20	L38	22	GO_VACUOLAR_MEMBRANE	21.1076
80:20	L39	21	GO_CLATHRIN_COATED_PIT	15.9612
80:20	L40	20	REACTOME_RECRUITMENT_OF_NUMA_TO_MITOTIC_CENTROSOMES	11.1676
80:20	L41	21	REACTOME_HOMOLOGY_DIRECTED_REPAIR	17.378
80:20	L42	20	REACTOME_COPI_INDEPENDENT_GOLGI_TO_ER_RETROGRADE_TRAFFIC	8.27635
80:20	L43	20	REACTOME_ORC1_REMOVAL_FROM_CHROMATIN	5.70663
80:20	L44	19	KEGG_ENDOMETRIAL_CANCER	10.6042
80:20	L45	19	REACTOME_ENDOSOMAL_SORTING_COMPLEX_REQUIRED_FOR_TRANSPORT_ESCRT	12.1669
80:20	L46	19	GO_GLYCOLYTIC_PROCESS_THROUGH_FRUCTOSE_6_PHOSPHATE	20.5238
80:20	L47	17	GO_OUTER_MEMBRANE	4.29957
80:20	L48	19	GO_ACTIN_CYTOSKELETON	6.107
80:20	L49	19	REACTOME_RHO_GTPASES_ACTIVATE_WASPS_AND_WAVES	19.301
80:20	L50	17	GO_PHOSPHORIC_ESTER_HYDROLASE_ACTIVITY	3.23571
80:20	L52	16	GO_PROTEIN_DEPHOSPHORYLATION	9.64941
80:20	L53	17	GO_SPLICEOSOMAL_TRI_SNRNP_COMPLEX	7.62381
80:20	L54	17	GO_PRERIBOSOME	12.5804
80:20	L55	17	GO_KINETOCHORE_ASSEMBLY	3.89036
80:20	L56	17	REACTOME_BIOSYNTHESIS_OF_THE_N_GLYCAN_PRECURSOR_DOLICHOL_LIPID_LINKED_OLIGOSACCHARIDE_LLO_AND_TRANSFER_TO_A_NASCENT_PROTEIN	16.7937
80:20	L57	15	REACTOME_FORMATION_OF_ATP_BY_CHEMIOSMOTIC_COUPLING	35.454
80:20	L58	16	KEGG_GLYCOSAMINOGLYCAN_BIOSYNTHESIS_HEPARAN_SULFATE	18.7902
80:20	L59	16	REACTOME_REGULATION_OF_EXPRESSION_OF_SLITS_AND_ROBOS	7.914
80:20	L60	16	GO_PEROXISOMAL_MEMBRANE_TRANSPORT	26.6073
80:20	L61	16	REACTOME_CYCLIN_A_B1_B2_ASSOCIATED_EVENTS_DURING_G2_M_TRANSITION	7.94804
80:20	L62	15	REACTOME_RNA_POLYMERASE_III_TRANSCRIPTION_INITIATION_FROM_TYPE_1_PROMOTER	10.4859
80:20	L63	16	GO_MEDIATOR_COMPLEX	35.796
80:20	L64	15	REACTOME_INTERFERON_ALPHA_BETA_SIGNALING	4.39443
80:20	L65	15	GO_P53_BINDING	4.47359
80:20	L66	15	GO_EPIDERMAL_CELL_DIFFERENTIATION	8.49159
80:20	L67	15	GO_CHROMOSOME_SEGREGATION	12.0725
80:20	L70	15	REACTOME_MITOTIC_SPINDLE_CHECKPOINT	5.56612
100:0 (CRISPR)	L1	346	REACTOME_MRNA_SPLICING	55.5109
100:0 (CRISPR)	L2	137	GO_MITOCHONDRIAL_GENE_EXPRESSION	183.453
100:0 (CRISPR)	L3	101	REACTOME_PROTEIN_PROTEIN_INTERACTIONS_AT_SYNAPSES	3.77726
100:0 (CRISPR)	L4	95	GO_SPLICEOSOMAL_COMPLEX	5.07312
100:0 (CRISPR)	L5	85	GO_MRNA_5_UTR_BINDING	3.52845
100:0 (CRISPR)	L6	72	REACTOME_DARPP_32_EVENTS	3.68535
100:0 (CRISPR)	L7	75	GO_REGIONALIZATION	5.3062
100:0 (CRISPR)	L8	74	GO_PYRIDINE_CONTAINING_COMPOUND_METABOLIC_PROCESS	2.98639
100:0 (CRISPR)	L9	65	GO_T_TUBULE	2.86661
100:0 (CRISPR)	L10	67	GO_RIBONUCLEOPROTEIN_COMPLEX_BIOGENESIS	8.68207
100:0 (CRISPR)	L11	67	REACTOME_RESPIRATORY_ELECTRON_TRANSPORT	92.282
100:0 (CRISPR)	L12	64	REACTOME_NUCLEOBASE_BIOSYNTHESIS	26.2016
100:0 (CRISPR)	L13	60	GO_SUBSTRATE_ADHESION_DEPENDENT_CELL_SPREADING	19.0378
100:0 (CRISPR)	L14	57	GO_CELLULAR_MODIFIED_AMINO_ACID_CATABOLIC_PROCESS	4.10402
100:0 (CRISPR)	L15	50	GO_GLUTATHIONE_DERIVATIVE_BIOSYNTHETIC_PROCESS	6.27397
100:0 (CRISPR)	L16	48	REACTOME_TRNA_PROCESSING	13.766
100:0 (CRISPR)	L17	44	GO_RNA_SPLICING	5.82928
100:0 (CRISPR)	L18	38	REACTOME_RESOLUTION_OF_D_LOOP_STRUCTURES_THROUGH_SYNTHESIS_DEPENDENT_STRAND_ANNEALING_SDSA	10.4953
100:0 (CRISPR)	L19	39	GO_DNA_PACKAGING_COMPLEX	56.7334
100:0 (CRISPR)	L20	38	GO_NCRNA_PROCESSING	19.7171
100:0 (CRISPR)	L21	34	GO_DETERMINATION_OF_ADULT_LIFESPAN	3.27925
100:0 (CRISPR)	L22	31	REACTOME_METABOLISM_OF_VITAMINS_AND_COFACTORS	4.53141
100:0 (CRISPR)	L23	34	GO_COATED_MEMBRANE	2.99012
100:0 (CRISPR)	L24	33	BIOCARTA_ARENRF2_PATHWAY	3.09594
100:0 (CRISPR)	L25	32	REACTOME_TRANSCRIPTIONAL_REGULATION_OF_WHITE_ADIPOCYTE_DIFFERENTIATION	27.8604
100:0 (CRISPR)	L26	29	REACTOME_PROCESSING_OF_CAPPED_INTRON_CONTAINING_PRE_MRNA	6.62577
100:0 (CRISPR)	L27	28	GO_COVALENT_CHROMATIN_MODIFICATION	4.94101
100:0 (CRISPR)	L28	28	GO_ERBB2_SIGNALING_PATHWAY	15.2611
100:0 (CRISPR)	L29	26	GO_PIGMENT_CELL_DIFFERENTIATION	6.53268
100:0 (CRISPR)	L30	23	GO_PERICENTRIC_HETEROCHROMATIN	3.36679
100:0 (CRISPR)	L31	24	REACTOME_COPI_MEDIATED_ANTEROGRADE_TRANSPORT	3.35741
100:0 (CRISPR)	L32	24	GO_CORNIFICATION	3.23994
100:0 (CRISPR)	L33	26	REACTOME_RRNA_PROCESSING_IN_THE_NUCLEUS_AND_CYTOSOL	18.2694
100:0 (CRISPR)	L34	25	GO_EMBRYONIC_SKELETAL_SYSTEM_MORPHOGENESIS	3.33153
100:0 (CRISPR)	L35	23	GO_LEUKOCYTE_ACTIVATION_INVOLVED_IN_INFLAMMATORY_RESPONSE	2.82903
100:0 (CRISPR)	L36	22	GO_ACUTE_PHASE_RESPONSE	4.38443
100:0 (CRISPR)	L37	21	GO_PHOSPHATIDYLINOSITOL_3_4_BISPHOSPHATE_BINDING	3.36287
100:0 (CRISPR)	L38	22	REACTOME_COOPERATION_OF_PREFOLDIN_AND_TRIC_CCT_IN_ACTIN_AND_TUBULIN_FOLDING	11.5325
100:0 (CRISPR)	L39	21	GO_MYELIN_SHEATH	2.70192
100:0 (CRISPR)	L40	17	GO_POSITIVE_REGULATION_OF_APOPTOTIC_SIGNALING_PATHWAY	3.06357
100:0 (CRISPR)	L41	21	REACTOME_HOMOLOGY_DIRECTED_REPAIR	17.378
100:0 (CRISPR)	L42	21	GO_SNRNA_TRANSCRIPTION	7.64363
100:0 (CRISPR)	L43	20	KEGG_GLYCOSAMINOGLYCAN_BIOSYNTHESIS_HEPARAN_SULFATE	20.6424
100:0 (CRISPR)	L44	19	GO_PROTEIN_EXIT_FROM_ENDOPLASMIC_RETICULUM	4.90685
100:0 (CRISPR)	L45	20	GO_MICROTUBULE_ORGANIZING_CENTER_PART	26.1112
100:0 (CRISPR)	L46	20	GO_GLYCOLYTIC_PROCESS_THROUGH_FRUCTOSE_6_PHOSPHATE	20.2647
100:0 (CRISPR)	L47	20	HALLMARK_OXIDATIVE_PHOSPHORYLATION	29.2846
100:0 (CRISPR)	L48	18	REACTOME_INFECTIOUS_DISEASE	5.52497
100:0 (CRISPR)	L49	15	GO_THYROID_HORMONE_GENERATION	3.94447
100:0 (CRISPR)	L50	18	GO_RIBOSOME_BIOGENESIS	8.0635
100:0 (CRISPR)	L51	18	GO_TRANSLATION_INITIATION_FACTOR_ACTIVITY	8.76922
100:0 (CRISPR)	L52	18	GO_CYTOSOLIC_TRANSPORT	9.88737
100:0 (CRISPR)	L53	18	GO_GOLGI_ORGANIZATION	14.3675
100:0 (CRISPR)	L54	17	REACTOME_BIOSYNTHESIS_OF_THE_N_GLYCAN_PRECURSOR_DOLICHOL_LIPID_LINKED_OLIGOSACCHARIDE_LLO_AND_TRANSFER_TO_A_NASCENT_PROTEIN	19.2745
100:0 (CRISPR)	L55	17	REACTOME_TRANSLOCATION_OF_SLC2A4_GLUT4_TO_THE_PLASMA_MEMBRANE	6.06243
100:0 (CRISPR)	L56	17	GO_MRNA_METABOLIC_PROCESS	6.2941
100:0 (CRISPR)	L57	17	ONCOGENIC_SIGNATURE_PKCA_DN.V1_UP	3.15703
100:0 (CRISPR)	L58	15	REACTOME_ORC1_REMOVAL_FROM_CHROMATIN	4.37539
100:0 (CRISPR)	L59	15	GO_REGULATION_OF_SYNAPTIC_TRANSMISSION_GABAERGIC	3.4492
100:0 (CRISPR)	L60	15	GO_VACUOLAR_MEMBRANE	16.7838
100:0 (CRISPR)	L61	15	GO_PHOSPHORIC_ESTER_HYDROLASE_ACTIVITY	4.74302
