# Supplementary figures and images for: shinyDepMap, a tool to identify targetable cancer genes and their functional connections from Cancer Dependency Map data
Source: eLife journal article supplement (doi:10.7554/elife.57116), 2021-02-08

Figure 5 – figure supplement 2

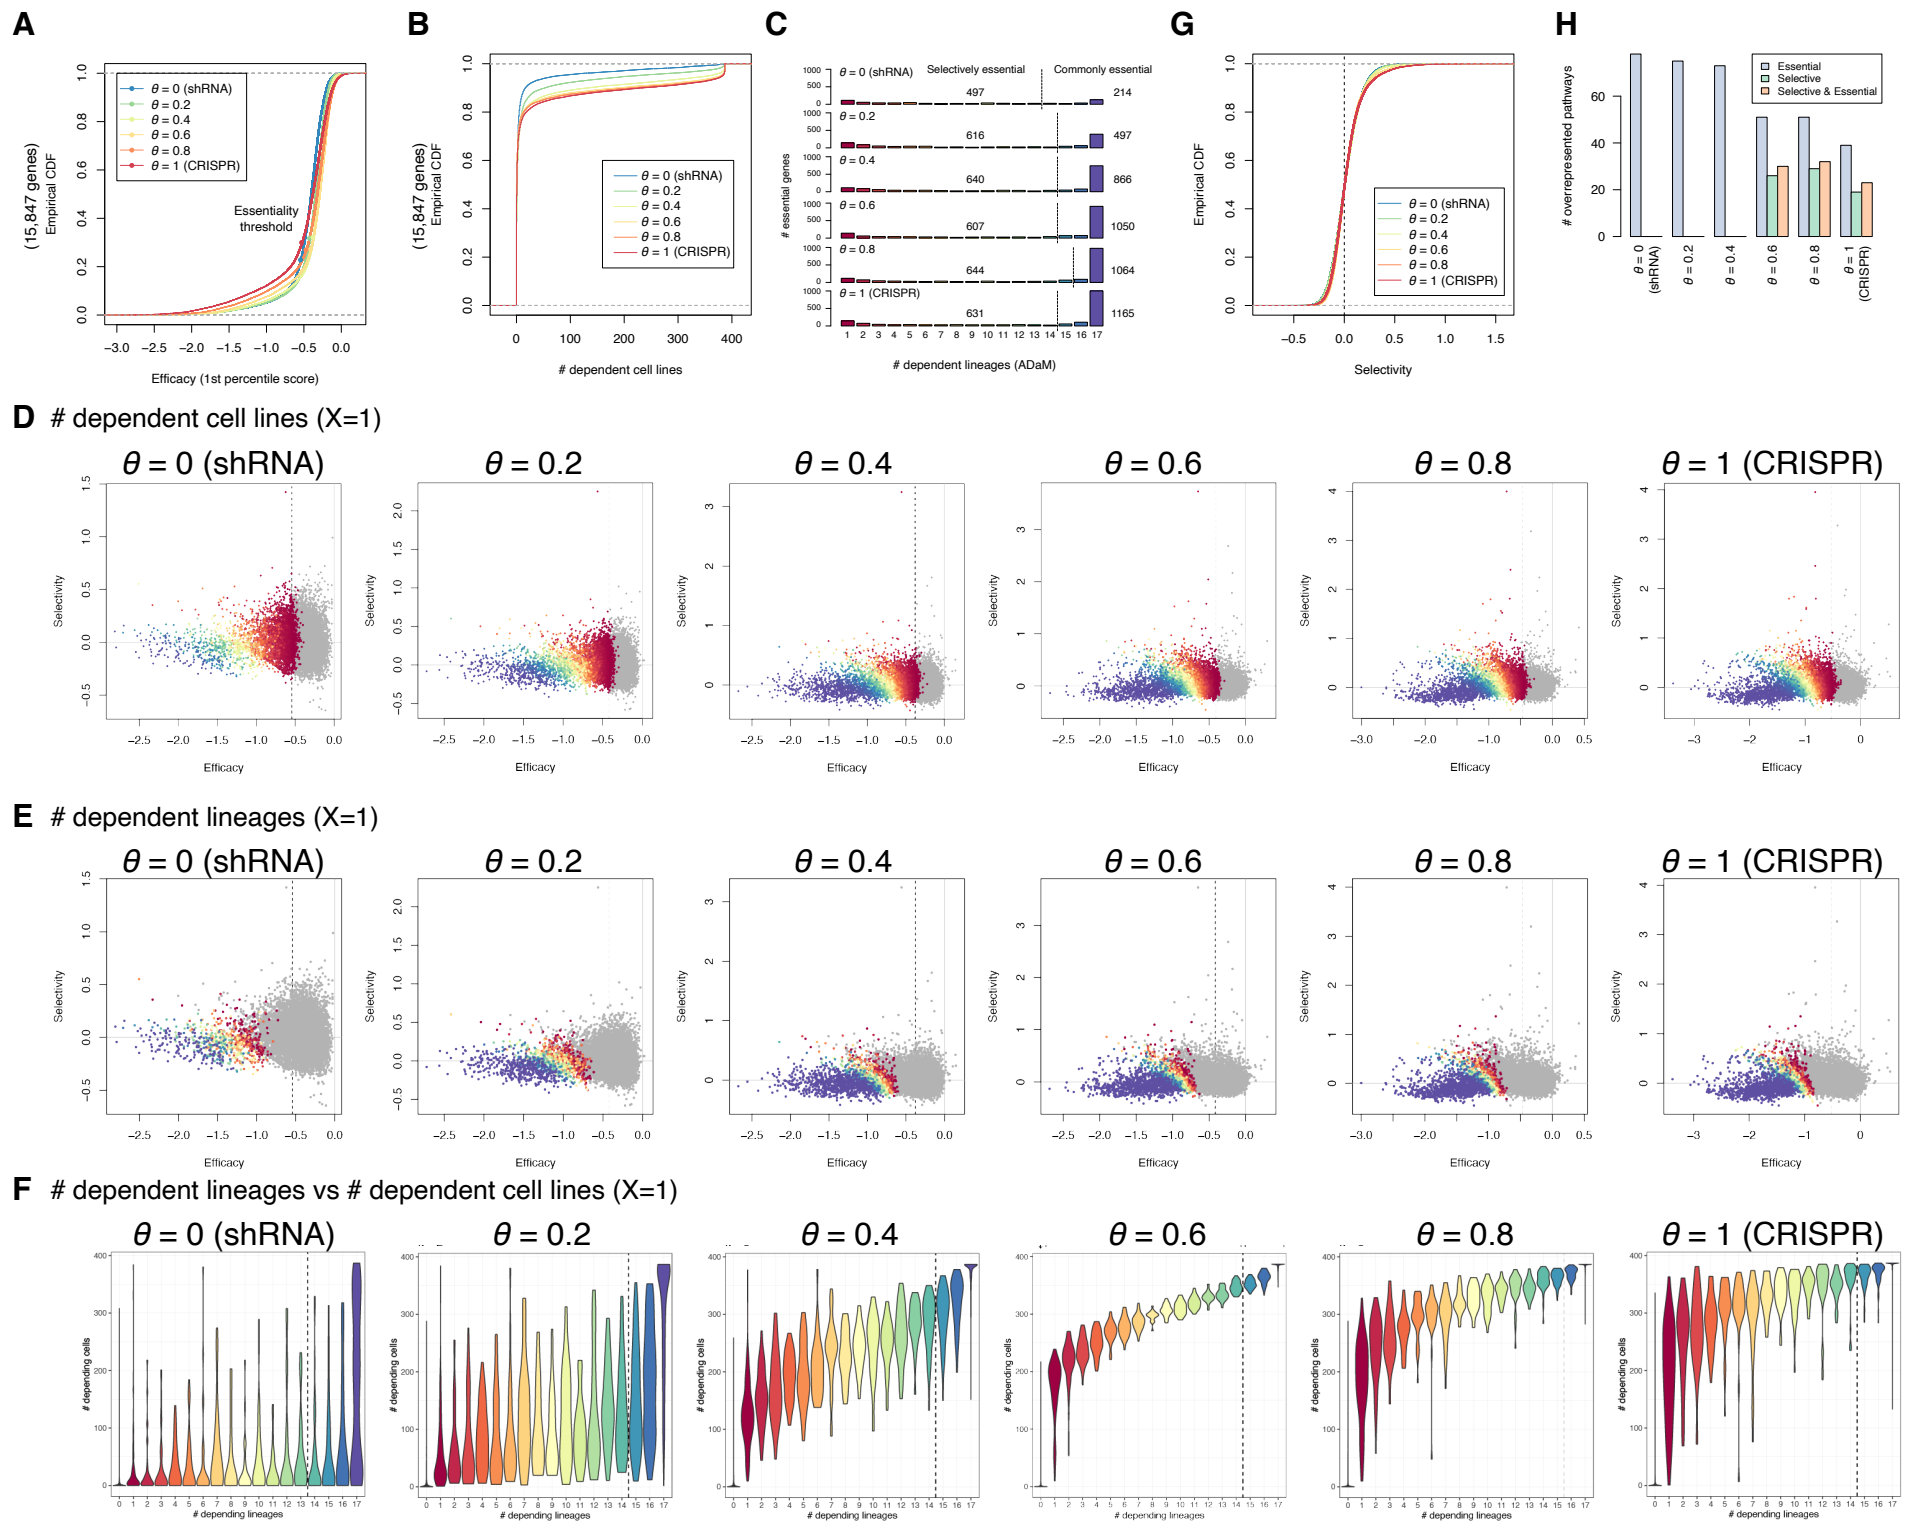

Supplement: supp [file elife-57116-supp-v1.zip]

Figure 5 - figure supplement 3

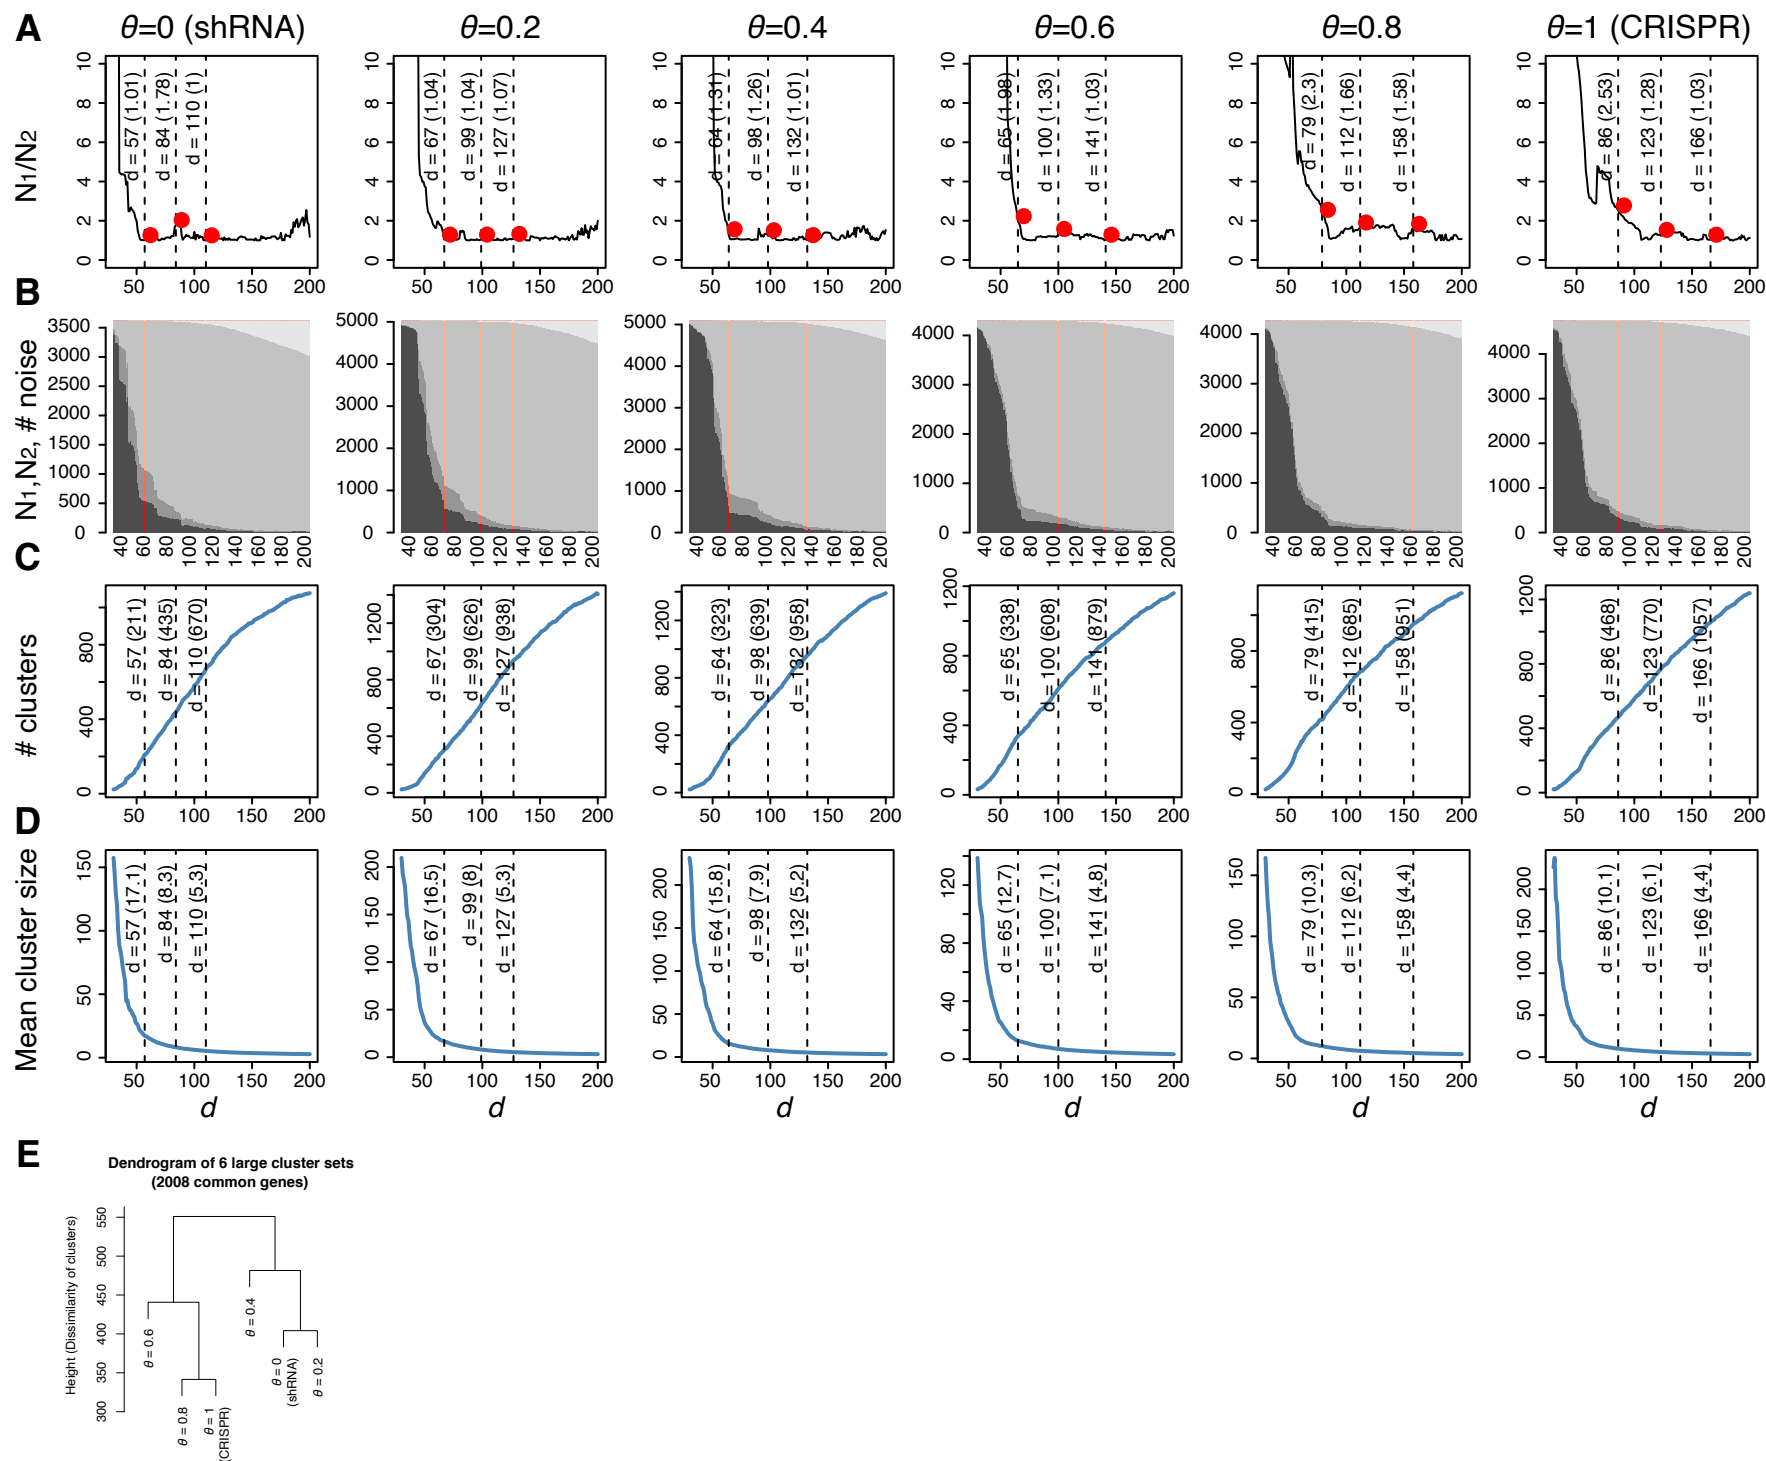

Supplement: supp [file elife-57116-supp-v1.zip]
